# Supplementary material for: Aflibercept Intervention in Experimental Branch Retinal Vein Occlusion Results in Upregulation of DnaJ Homolog Subfamily C Member 17
Source: Hindawi journal article supplement (doi:10.1155/2021/6690260), 2021-03-06
Supplement: f1 [file 6690260.f1.zip]

**Supplementary table 3 – significantly regulated proteins in BRVO vs. control**

| Protein ID | Protein name                                                                        | Gene name | P-value               | Ratio BRVO/control |
|------------|-------------------------------------------------------------------------------------|-----------|-----------------------|--------------------|
| Q14315-2   | Isoform 2 of Filamin-C                                                              | FLNC      | 0.00019               | 6.03               |
| Q8MJ14     | Glutathione peroxidase 1                                                            | GPX1      | 0.0064                | 2.94               |
| P08835     | Serum albumin                                                                       | ALB       | 0.0044                | 2.70               |
| P31950     | Protein S100-A11                                                                    | S100A11   | $7.92 \times 10^{-5}$ | 2.60               |
| P14287     | Osteopontin                                                                         | SPP1      | 0.0043                | 2.60               |
| P37802     | Transgelin-2                                                                        | TAGLN2    | 0.0022                | 2.50               |
| P02543     | Vimentin                                                                            | VIM       | 0.00021               | 2.45               |
| Q863Z0     | Proteasome activator complex subunit 2                                              | PSME2     | 0.0046                | 2.42               |
| P19620     | Annexin A2                                                                          | ANXA2     | 0.00053               | 2.41               |
| P08132     | Annexin A4                                                                          | ANXA4     | 0.0028                | 2.41               |
| Q9BX66-9   | Isoform 9 of Sorbin and SH3 domain-containing protein 1 domain-containing protein 1 | SORBS1    | 0.0047                | 2.36               |
| P19619     | Annexin A1                                                                          | ANXA1     | 0.0016                | 2.31               |
| Q9H4A4     | Aminopeptidase B                                                                    | RNPEP     | 0.0013                | 2.30               |
| P01846     | Ig lambda chain C region                                                            |           | 0.00098               | 2.23               |
| P14136     | Glial fibrillary acidic protein                                                     | GFAP      | 0.0064                | 2.18               |
| P08758     | Annexin A5                                                                          | ANXA5     | 0.0031                | 1.98               |
| P21333-2   | Isoform 2 of Filamin-A                                                              | FLNA      | 0.00024               | 1.90               |
| Q7M2W6     | Alpha-crystallin B chain                                                            | CRYAB     | 0.0032                | 1.90               |
| P13797     | Plastin-3                                                                           | PLS3      | 0.0071                | 1.86               |
| P83731     | 60S ribosomal protein L24                                                           | RPL24     | 0.0089                | 1.80               |
| O00629     | Importin subunit alpha-3                                                            | KPNA4     | 0.0096                | 1.80               |
| P50995-2   | Isoform 2 of Annexin A11                                                            | ANXA11    | 0.0028                | 1.77               |
| Q96J01-2   | Isoform 2 of THO complex subunit 3                                                  | THOC3     | 0.002                 | 1.75               |
| P12814     | Alpha-actinin-1                                                                     | ACTN1     | $7.16 \times 10^{-5}$ | 1.72               |
| Q8NEU8     | DCC-interacting protein 13-beta                                                     | APPL2     | 0.0056                | 1.61               |
| Q13642-1   | Isoform 1 of Four and a half LIM domains protein 1                                  | FHL1      | 0.0019                | 1.58               |
| P35579     | Myosin-9                                                                            | MYH9      | 0.0067                | 1.53               |
| Q9Y2J0-2   | Isoform 2 of Rabphilin-3A                                                           | RPH3A     | 0.0035                | 1.52               |
| P82460     | Thioredoxin                                                                         | TXN       | 0.0059                | 1.45               |
| O15031     | Plexin-B2                                                                           | PLXNB2    | 0.0051                | 1.35               |
| O43707     | Alpha-actinin-4                                                                     | ACTN4     | 0.0049                | 1.33               |
| O43347     | RNA-binding protein Musashi homolog 1                                               | MSI1      | 0.0017                | 1.28               |
| Q14558     | Phosphoribosyl pyrophosphate synthase-associated protein 1                          | PRPSAP1   | 0.002                 | 0.81               |
| P09104     | Gamma-enolase                                                                       | ENO2      | 0.0055                | 0.81               |
| P13591-4   | Isoform 4 of Neural cell adhesion molecule 1                                        | NCAM1     | 0.005                 | 0.79               |
| O95782-2   | Isoform B of AP-2 complex subunit alpha-1                                           | AP2A1     | 0.0072                | 0.79               |
| Q02218 O   | 2-oxoglutarate dehydrogenase,                                                       | OGDH      | 0.0031                | 0.78               |
| P21281     | V-type proton ATPase subunit B, brain isoform                                       | ATP6V1B2  | 0.00016               | 0.75               |
| Q99962     | Endophilin-A1                                                                       | H3GL2     | 0.0056                | 0.75               |
| Q8MIZ3     | m7GpppX diphosphatase                                                               | DCPS      | 0.0043                | 0.72               |

|          |                                                                            |        |         |      |
|----------|----------------------------------------------------------------------------|--------|---------|------|
| P62760   | Visinin-like protein 1                                                     | VSNL1  | 0.0068  | 0.66 |
| Q99623-2 | Isoform 2 of Prohibitin-2                                                  | PHB2   | 0.002   | 0.65 |
| O97580   | Succinate--CoA ligase [ADP-forming] subunit beta, mitochondrial (Fragment) | SUCLA2 | 0.00098 | 0.64 |
| Q9UHD9   | Ubiquilin-2                                                                | UBQLN2 | 0.0023  | 0.64 |
| P43007   | Neutral amino acid transporter A                                           | SLC1A4 | 0.0035  | 0.57 |
| P10745   | Retinol-binding protein 3                                                  | RBP3   | 0.0077  | 0.55 |
| Q8HZV3   | Transferrin receptor protein 1                                             | TFRC   | 0.0024  | 0.54 |
| Q13884-2 | Isoform 2 of Beta-1-syntrophin                                             | SNTB1  | 0.0083  | 0.51 |
