# Supplementary material for: Aflibercept Intervention in Experimental Branch Retinal Vein Occlusion Results in Upregulation of DnaJ Homolog Subfamily C Member 17
Source: J Ophthalmol. 2021 Mar 6;2021:6690260. doi: 10.1155/2021/6690260 (PMC7960061; doi:10.1155/2021/6690260)
Supplement: Supplementary Materials — Appendix A: unfiltered results from database search. Appendix B: all successfully identified and quantified proteins. Appendix C: test of reproducibility of the BRVO model at the molecular level. [file 6690260.f1.zip]

Archive with 3 entries (3 files):
- Appendix A.xlsx
- Appendix B.xlsx
- Appendix C (1).pdf
