# Supplementary material for: Aflibercept Intervention in Experimental Branch Retinal Vein Occlusion Results in Upregulation of DnaJ Homolog Subfamily C Member 17
Source: J Ophthalmol. 2021 Mar 6;2021:6690260. doi: 10.1155/2021/6690260 (PMC7960061; doi:10.1155/2021/6690260)
Supplement: Supplementary Materials — Appendix A: unfiltered results from database search. Appendix B: all successfully identified and quantified proteins. Appendix C: test of reproducibility of the BRVO model at the molecular level. [file 6690260.f1.zip › Appendix A.xlsx]

## Sheet: Ark1
LFQ intensity EYIN1H_1	LFQ intensity EYIN1H_2	LFQ intensity EYIN2H	LFQ intensity EYIN3H	LFQ intensity EYIN4H	LFQ intensity EYIN5H	LFQ intensity EYIN6H	LFQ intensity EYS1V_1	LFQ intensity EYS1V_2	LFQ intensity EYS2V	LFQ intensity EYS3V	LFQ intensity EYS4V	LFQ intensity EYS5V	LFQ intensity EYS6V	LFQ intensity EYZ1H	LFQ intensity EYZ1V	LFQ intensity EYZ2H	LFQ intensity EYZ2V	LFQ intensity EYZ3H	LFQ intensity EYZ3V	LFQ intensity EYZ4H	LFQ intensity EYZ4V	LFQ intensity EYZ5H	LFQ intensity EYZ1H_OC	LFQ intensity EYZ1V_OC	LFQ intensity EYZ2H_OC	LFQ intensity EYZ2V_OC	LFQ intensity EYZ3H_OC	LFQ intensity EYZ3V_OC	LFQ intensity EYZ4H_OC	LFQ intensity EYZ4V_OC	LFQ intensity EYZ5H_OC	LFQ intensity EYZ5V_1	LFQ intensity EYZ5V_2	LFQ intensity EYZ6H_1	LFQ intensity EYZ6H_2	LFQ intensity EYZ6V_1	LFQ intensity EYZ6V_2	C: Only identified by site	C: Reverse	C: Potential contaminant	N: Peptides	N: Razor + unique peptides	N: Unique peptides	N: Sequence coverage [%]	N: Unique + razor sequence coverage [%]	N: Unique sequence coverage [%]	N: Mol. weight [kDa]	N: Q-value	N: Score
95326000	170730000	31451000	614560000	116920000	61908000	64067000	332390000	449710000	66378000	48789000	104660000	99365000	35969000	81146000	40313000	89900000	20979000	0	33413000	124540000	46852000	376680000	94018000	53796000	122810000	42946000	179030000	109700000	237390000	110840000	234190000	76169000	71518000	88451000	27031000	74970000	20739000			+	1	1	1	2.9	2.9	2.9	46.397	0	123.73
2654900	0	0	13484000	4251500	0	7155700	4739700	0	3256300	3398700	0	3978600	3843100	0	0	0	0	0	0	0	0	0	6095200	4617700	0	4415300	0	3977900	8269500	2834000	25664000	0	4955700	0	0	3280500	7717000			+	2	2	2	3.8	3.8	3.8	77.456	0.0025967	2.511
93594000	62470000	61298000	437400000	55981000	25516000	18404000	168560000	150580000	69654000	31585000	57139000	43858000	88506000	55010000	27268000	37631000	13114000	106630000	16718000	52580000	7778100	172450000	54693000	27566000	72291000	22594000	86561000	32581000	59727000	20861000	200610000	61624000	10868000	34177000	29565000	38617000	32983000			+	3	3	3	10.5	10.5	10.5	53.341	0	323.31
132900000	85144000	20249000	580570000	87657000	23542000	50476000	374880000	258740000	12101000	9588100	46490000	243000000	45914000	57344000	50667000	22465000	0	84864000	0	50596000	0	615770000	73161000	57105000	59576000	54457000	43954000	25128000	47151000	21512000	356000000	0	0	48849000	57458000	13360000	0			+	3	3	2	3.1	3.1	2.2	164.34	0	36.215
0	3331200	0	59840000	0	0	0	23100000	75969000	0	0	0	0	0	666890	1164700	0	0	0	0	0	0	0	1276400	0	1216100	0	1159500	792590	0	1191200	33701000	0	0	1496800	0	0	0			+	2	2	2	2.9	2.9	2.9	65.19	0	6.5271
124520000	93561000	98050000	155230000	89109000	89536000	100480000	109410000	61715000	121650000	40967000	150760000	299200000	121250000	50899000	46793000	118650000	59338000	82091000	101310000	106270000	0	98531000	84785000	75054000	80520000	54919000	299160000	168460000	135880000	107640000	67897000	116830000	92165000	87072000	86729000	104560000	110210000			+	3	3	3	23.8	23.8	23.8	24.409	0	78.927
76905000	98915000	63207000	141940000	71109000	57321000	32683000	64966000	102620000	77362000	81860000	63241000	22074000	21067000	6220900	17139000	40144000	2831800	37108000	44821000	40139000	30186000	59787000	31801000	10965000	36425000	17939000	29678000	56948000	47801000	27770000	20106000	90360000	122790000	63996000	25364000	16230000	81351000			+	2	1	1	15.2	8.3	8.3	15.954	0	194.42
0	0	0	0	0	4811500	0	0	0	0	0	0	23255000	0	0	0	0	12411000	0	0	0	0	0	0	0	0	0	0	0	0	0	0	0	0	0	0	0	0			+	4	3	3	14.2	12.3	12.3	51.561	0	9.256
0	0	36246000	0	17709000	15095000	0	0	13330000	905690	0	20186000	158720000	12736000	6978000	10316000	22312000	80238000	33801000	18515000	14501000	27283000	16706000	7483000	11869000	16703000	186170000	24599000	39071000	24357000	24160000	8875800	26582000	30447000	10517000	5603500	10096000	21800000			+	8	8	4	19.7	19.7	11.3	60.044	0	101.43
1189100000	797630000	609020000	1120900000	665990000	460900000	524670000	949040000	832080000	488080000	305810000	388900000	715330000	667940000	682060000	539150000	1143100000	611380000	763640000	526170000	639840000	570450000	669990000	639240000	538880000	1080000000	561540000	541230000	627930000	730450000	751380000	1285300000	437010000	610960000	574980000	742920000	698750000	495170000			+	6	6	3	64.3	64.3	32.1	15.057	0	323.31
0	0	0	0	0	0	0	0	0	0	0	0	0	0	0	0	0	0	16186000	0	0	0	0	0	0	0	0	0	0	0	0	0	0	0	0	0	0	0			+	1	1	1	12.4	12.4	12.4	23.583	0.00035945	5.0809
0	0	0	3160400000	0	0	0	0	0	0	0	0	413980000	0	340820000	80206000	188980000	0	0	0	0	0	0	366160000	101560000	159940000	0	121230000	125580000	0	0	1691000000	0	0	0	0	0	0			+	2	1	1	5.1	3	3	56.44	0	46.255
4011200	4785400	10418000	12749000	0	12792000	29287000	5901300	0	23579000	7264200	0	0	0	6336200	0	0	0	9184600	0	0	0	0	12644000	4206600	6717400	0	6173900	9557500	0	8500700	4035800	11051000	18370000	4597800	0	5719700	0			+	1	1	1	2.6	2.6	2.6	51.385	0	7.7152
0	0	7695700	672720	0	5901800	783760	1726600	0	0	0	901710	316380000	2293700	1085200	4604400	1381500	78267000	14250000	0	0	0	6839400	0	0	0	206320000	59053000	0	0	0	42882000	11538000	0	1776100	624330	0	0			+	6	6	4	20.9	20.9	14.6	51.267	0	148.82
41279000	67308000	179440000	10552000	76854000	24902000	27246000	8486600	27206000	13024000	30013000	41311000	253150000	13563000	35531000	73730000	134420000	513040000	165780000	136920000	48402000	220000000	76358000	53838000	70958000	149110000	305400000	141740000	116810000	58097000	213020000	32605000	103650000	76969000	42841000	143640000	93996000	178490000			+	10	10	10	31.5	31.5	31.5	58.826	0	323.31
0	0	0	0	0	0	0	0	0	0	0	0	0	0	0	0	0	0	0	0	0	0	0	0	0	0	0	0	0	0	0	0	0	0	0	0	0	0			+	1	1	1	5.2	5.2	5.2	38.252	0	59.554
3394600	0	3918200	1684700	22552000	0	0	11503000	0	0	7206200	9182300	4859100	234960000	3336600	18338000	16805000	0	37843000	11734000	9063100	6810800	1988600	0	15333000	8354800	35533000	40894000	38113000	36870000	23869000	9847200	0	3860600	3848100	24587000	13990000	8069100			+	5	5	5	17.5	17.5	17.5	62.064	0	28.992
8104400	12368000	18846000	7478000	15975000	2323300	20277000	0	3699000	7902200	16198000	34900000	45355000	29898000	13423000	28859000	19266000	12149000	38289000	62475000	29865000	43415000	30617000	13508000	18870000	34679000	22444000	26366000	65405000	23722000	62803000	12479000	46882000	20911000	12470000	8415100	30681000	15560000			+	7	4	4	22.7	17.7	17.7	65.432	0	73.361
12649000	19879000	6271100	54221000	28173000	8375500	1360600	27426000	49136000	4358100	0	2995700	20207000	17989000	1608600	510180	3338900	0	0	0	2532400	334370	18857000	0	0	0	0	0	0	7948900	0	31350000	12859000	2945100	9626600	0	4914500	0			+	2	2	2	5.2	5.2	5.2	52.347	0	43.971
150020000	240130000	224130000	205490000	296900000	179530000	190140000	147320000	180070000	204550000	182330000	96622000	227880000	377510000	104570000	288420000	125360000	116710000	182560000	252650000	159220000	340080000	125930000	122740000	198880000	154720000	237100000	181330000	222670000	237860000	395930000	114920000	198870000	304200000	184870000	138630000	129050000	163960000			+	3	3	3	24.8	24.8	24.8	11.703	0	323.31
2409700	3274400	2013200	11603000	3602400	3458200	2677100	6654100	10346000	6811500	3255600	4753800	5493000	3349100	6024600	4160300	0	0	0	2600100	0	4616700	12969000	3751600	2126200	1738500	917180	1570100	0	2042400	0	4701200	1241700	3995700	1816800	3663300	2456400	5821200			+	1	1	1	5.3	5.3	5.3	38.429	0.00063512	3.3292
4719500	0	0	83013000	33966000	10421000	33032000	11683000	0	17687000	30937000	42217000	37874000	8769300	21734000	11723000	17707000	13889000	8894600	0	42569000	17307000	53753000	0	0	13634000	17074000	21512000	17954000	0	9563300	0	26956000	16669000	13446000	49322000	0	0			+	3	1	1	5.7	2.6	2.6	75.829	0	105.4
5653500	0	0	24630000	7898800	4880400	550060	6555900	4208400	0	2081400	0	3462100	2602600	5817500	0	5586200	0	7057700	3555800	3782400	0	34382000	3865700	0	0	0	2805200	2550700	0	0	3445700	0	0	0	0	0	0			+	1	1	1	3.7	3.7	3.7	65.056	0	9.6343
1426000	0	0	32322000	7296600	0	0	2420100	4490400	0	9683200	0	0	0	5850200	0	0	0	0	0	23181000	0	10226000	7004800	0	0	5224600	0	0	29587000	0	5067100	0	0	3585400	9461100	0	0			+	4	4	4	5.1	5.1	5.1	129.39	0	12.712
1342800	1116500	3448800	0	429010	0	0	1529400	1795200	1673600	0	0	0	0	2886400	0	0	0	0	0	0	0	0	0	0	0	0	0	879090	0	0	0	1117100	1611500	613680	605750	1151300	3254700			+	1	1	1	2.6	2.6	2.6	40.87	0.0038304	2.1368
0	3034400	0	10162000	3476100	3301800	0	3825200	5559000	3499700	0	0	3101600	2852100	2909900	0	2041400	0	0	0	2509000	0	6211400	0	0	0	0	4516100	0	0	0	6255100	0	1282500	0	1956900	0	0			+	1	1	1	3.7	3.7	3.7	43.017	0.0030488	2.2209
342810	22700000	0	44190000	13284000	15534000	10086000	31514000	0	8295800	0	16880000	28394000	20004000	11751000	18134000	33876000	0	13524000	0	0	0	30251000	20906000	9540600	17827000	0	12378000	8450900	11275000	6866800	39268000	0	0	0	10516000	0	10368000			+	1	1	1	3.4	3.4	3.4	85.411	0	39.203
37834000	2158300	3677900	49404000	42444000	34328000	11499000	23119000	12105000	1317700	15688000	45812000	57106000	23298000	1500600	0	24445000	0	30911000	26703000	16360000	136300000	0	0	0	25887000	0	0	11679000	8966400	28300000	0	0	0	8883900	0	5016200	5651200			+	10	1	0	28.8	4.5	0	85.686	0	14.441
0	0	826220	1580700	863110	0	0	1745100	851070	0	0	0	0	0	0	0	0	0	0	0	0	0	0	0	0	0	0	0	0	0	0	0	0	0	0	0	0	0			+	4	1	1	13	5.6	5.6	32.85	0.00064309	3.4533
0	0	0	0	0	0	0	0	0	0	0	0	0	0	0	0	0	0	0	0	0	0	0	0	0	0	0	0	0	0	0	96152	0	0	0	0	0	0			+	2	1	1	6	1.5	1.5	51.606	0	8.4298
0	944660	0	0	911730	0	0	0	0	3776400	0	0	0	0	0	0	0	0	1963200	2070100	0	1628300	0	0	0	0	0	0	0	0	0	0	0	0	0	0	0	0	+		+	12	1	1	29.8	2.9	2.9	62.87	1	-2
12575000	9348800	26476000	26125000	11036000	4826800	26865000	31942000	15882000	18568000	11084000	0	0	6136000	12264000	4907600	12850000	61641000	16285000	0	15072000	52867000	30296000	16015000	8463200	6797300	7247600	23539000	8015500	12043000	13774000	13174000	14322000	15699000	6483500	22573000	9593200	10972000			+	4	2	2	14.7	8.4	8.4	46.228	0	17.896
0	0	0	30190000	0	985570	0	0	0	3649200	0	1513200	52488000	4415100	7090900	0	1212200	0	0	12262000	22998000	0	0	9750300	4019500	0	0	12737000	28496000	23536000	4159200	0	0	0	0	0	0	0			+	2	2	2	5.1	5.1	5.1	46.203	0.00032819	3.6613
0	0	20337000	0	0	0	0	0	0	0	0	0	0	0	0	0	0	0	0	0	0	0	0	2835400	0	0	0	0	0	0	0	0	0	0	0	0	21469000	0		+	+	1	1	1	0	0	0	44.689	0.0099744	1.72
0	0	0	8688300	0	36101000	22909000	11650000	0	0	0	11099000	9437000	9594600	11244000	12619000	11397000	0	0	0	11699000	0	19446000	15094000	12696000	0	0	0	0	13398000	0	16627000	0	14083000	0	0	15000000	10175000		+	+	1	1	1	0	0	0	86.858	0.0085161	1.7661
0	0	0	0	0	0	0	0	0	0	0	0	0	0	0	0	0	0	0	0	0	0	0	0	0	0	0	0	0	0	0	0	0	0	0	0	0	0		+	+	1	1	1	0	0	0	23.122	0.0077801	1.8048
3157800	5431500	7659100	8594800	0	18874000	13511000	25271000	3120000	11377000	0	0	2771600	0	0	0	2262800	0	0	0	0	0	6148200	87866000	77202000	28077000	41001000	11566000	25775000	34584000	24179000	31998000	3478200	9971700	2214600	7720000	3919100	14472000		+		1	1	1	0	0	0	12.968	0.0026347	2.5949
0	0	0	0	0	0	0	0	0	0	0	0	0	0	0	0	0	0	0	0	0	0	0	0	0	0	0	0	0	0	0	0	0	0	0	0	0	21846000	+	+		1	1	1	0	0	0	63.936	1	-2
0	0	0	0	0	0	0	0	0	0	0	0	0	0	0	0	0	0	0	0	0	0	0	0	0	0	0	0	2337900	0	0	0	0	0	0	0	0	0		+		1	1	1	0	0	0	21.048	0.0092545	1.7415
0	0	0	0	164120000	0	112330000	139030000	0	0	0	0	125510000	0	0	85399000	112820000	0	0	0	0	0	0	0	111900000	123850000	95008000	80759000	95530000	0	111600000	127670000	135170000	0	0	207370000	0	0	+	+		2	2	2	0	0	0	71.247	1	-2
0	0	0	0	0	0	0	0	0	0	0	0	0	0	0	0	0	0	0	0	0	0	0	14606000	17096000	0	0	0	0	0	0	0	0	0	0	0	0	0	+	+		1	1	1	0	0	0	22.077	1	-2
0	0	0	0	0	0	0	0	0	0	0	2941800	0	0	0	0	0	0	0	0	0	0	0	0	0	0	0	0	0	0	0	0	0	0	0	0	0	0		+		1	1	1	0	0	0	134.4	0.0020778	2.7068
48499000	687860000	131300000	150730000	18381000	80775000	0	133760000	79442000	159340000	83955000	36116000	0	72051000	141580000	86008000	43125000	50510000	405170000	54311000	81696000	53268000	1105900000	124010000	183560000	104260000	87488000	103070000	99907000	189180000	155830000	132120000	116800000	24416000	123020000	44432000	154270000	0		+		1	1	1	0	0	0	42.026	0.0090021	1.7512
0	6369200	12508000	0	0	0	0	24413000	45215000	40561000	131300000	3293400	0	0	0	49833000	0	0	0	0	0	66159000	0	0	0	57275000	4645600	22975000	37441000	55063000	0	22349000	37237000	0	30938000	65861000	33722000	84049000		+		2	2	2	0	0	0	63.187	0.0070588	1.8639
0	0	0	61339000	134670000	71020000	62378000	114580000	0	52217000	0	22542000	38005000	113340000	156380000	69789000	83695000	84197000	38045000	52765000	42250000	0	0	120090000	98322000	139010000	114860000	89227000	94528000	95715000	137250000	151940000	70641000	45767000	39317000	22315000	62825000	52514000		+		1	1	1	0	0	0	41.537	0.0073069	1.8534
0	0	0	0	33521000	65372000	52607000	0	71826000	46042000	0	37993000	15842000	39446000	47638000	36491000	32545000	18174000	0	0	0	0	19618000	0	61257000	25274000	0	0	0	0	0	0	0	0	0	0	32985000	97839000		+		2	2	2	0	0	0	509.7	0.0031153	2.3846
22670000	14190000	14281000	14179000	30861000	0	0	12308000	2771100	7608000	29526000	0	0	0	0	48078000	32058000	0	0	0	25987000	65021000	0	0	0	0	0	0	0	0	0	0	17395000	0	16450000	15743000	24598000	12064000	+	+		1	1	1	0	0	0	214.8	1	-2
70376000	3797400	58433000	5421500	21669000	16395000	34464000	18897000	14312000	18727000	0	0	10558000	0	52404000	44218000	23543000	0	15902000	30490000	15355000	0	22180000	39788000	41480000	14382000	17866000	12450000	14469000	16873000	17177000	18865000	17804000	12638000	17518000	17223000	41507000	22691000		+		1	1	1	0	0	0	27.805	0.004104	2.1338
103080000	115160000	9128800	96435000	47470000	21889000	37445000	79375000	85220000	66745000	76363000	28480000	44791000	44152000	80550000	44027000	59369000	0	164680000	169140000	146670000	76159000	154320000	57116000	62820000	80265000	50184000	49213000	36917000	60614000	64612000	53775000	79296000	11304000	154650000	192040000	62477000	131340000		+		1	1	1	0	0	0	256	0.001537	3.0104
0	0	0	0	0	0	0	0	0	0	0	0	0	0	0	0	37363000	0	0	0	0	0	0	0	0	2822500	0	0	1646800	0	0	0	0	0	0	0	0	0	+	+		1	1	1	0	0	0	23.147	1	-2
1751400	775850	1191000	1936100	1212800	2088700	1735000	1250800	819900	740670	2000200	1260500	700990	1744100	1141900	1064100	2183700	0	1374100	1763000	335260	1979200	898280	0	0	0	0	0	0	0	0	1307500	1533300	1212700	1340800	1976900	1533000	0	+	+		1	1	1	0	0	0	37.507	1	-2
0	0	0	0	0	0	0	0	0	0	0	0	0	0	0	0	0	0	0	0	0	0	0	1131400	0	0	0	0	0	0	0	987130	0	1027800	0	0	0	0	+	+		1	1	1	0	0	0	211.68	1	-2
0	5155800	0	0	5707200	0	0	0	0	0	0	7974000	9061200	7209900	5473900	0	11435000	0	4719800	5744900	0	0	0	0	0	0	0	0	0	0	0	0	0	5612900	0	0	0	0	+	+		1	1	1	0	0	0	45.733	1	-2
152620000	140370000	0	99436000	32815000	97332000	222090000	121730000	97102000	0	107890000	102570000	44050000	0	0	186800000	0	0	0	0	131180000	0	0	0	0	0	0	0	147910000	80446000	131940000	88994000	153460000	0	111300000	143320000	212340000	228350000	+	+		2	2	2	0	0	0	217.17	1	-2
0	0	0	0	0	0	0	1434400	0	2428200	0	0	0	0	0	0	0	0	0	0	0	0	0	0	0	0	0	0	0	0	0	0	1147400	1981700	613240	1531800	0	0		+		1	1	1	0	0	0	46.386	0.0033076	2.1822
0	5074800	3563800	1914200	3363200	2304800	4088700	0	957840	3741400	1984400	6329800	5296500	4402900	2770800	5022100	3820100	0	2689400	0	0	3958500	0	0	0	0	0	0	0	0	0	0	1202300	0	1952500	2763900	1891600	2147300	+	+		1	1	1	0	0	0	95.801	1	-2
0	0	0	0	0	0	0	0	0	0	0	7719900	0	0	0	0	0	0	0	0	0	0	0	0	0	0	0	0	0	0	0	0	0	0	0	0	0	0	+	+		1	1	1	0	0	0	35.398	1	-2
39918000	0	84553000	91952000	0	33031000	0	74881000	65045000	3865200	0	26461000	0	0	0	0	43941000	0	0	27850000	0	58070000	0	0	0	0	0	0	0	0	0	0	86545000	89308000	84949000	42491000	12155000	95779000	+	+		2	2	2	0	0	0	250.75	1	-2
0	0	0	0	69586000	0	40733000	0	0	0	0	18823000	0	84840000	0	37745000	0	0	0	0	0	0	0	49425000	90295000	56788000	46774000	41749000	44706000	45175000	71297000	41141000	0	0	0	0	0	0		+		1	1	1	0	0	0	47.314	0.005606	1.9997
5647700	0	9471200	0	0	2299700	0	0	0	0	0	3680000	0	0	0	7788200	0	0	0	0	0	0	0	0	12191000	0	0	0	0	0	0	0	7397800	5253300	4802000	0	7921100	0		+		3	3	3	0	0	0	134.19	0.00036819	5.5768
0	0	0	0	0	16085000	21860000	0	18604000	0	6113300	13128000	5880500	13269000	24760000	28206000	18595000	0	15303000	21739000	17795000	26086000	19385000	0	0	0	20224000	0	0	0	0	0	0	0	0	0	0	0		+		2	2	2	0	0	0	58.063	0.0049046	2.1024
0	0	0	9355000	0	0	0	0	0	0	0	0	0	0	0	0	0	0	0	0	0	0	0	0	0	0	0	0	0	0	0	0	0	0	0	0	0	0		+		1	1	1	0	0	0	14.689	0.0054025	2.0559
0	0	0	0	0	0	0	0	0	0	0	0	0	0	0	0	0	0	0	0	0	0	0	0	39733000	0	0	0	0	0	0	0	0	0	0	0	0	0	+	+		1	1	1	0	0	0	11.535	1	-2
75712000	0	0	145570000	66606000	52829000	91713000	102490000	0	0	19796000	133270000	64668000	108090000	41467000	47896000	58881000	0	142030000	100460000	97731000	89835000	94581000	116080000	87585000	0	96687000	190420000	170990000	94854000	71727000	134420000	607420	122290000	0	0	66140000	0		+		2	2	2	0	0	0	72.66	0.0060911	1.9433
8828600	15911000	0	15296000	14762000	10731000	13337000	15008000	9996500	17124000	15020000	16764000	7967100	0	16875000	0	7863100	0	4308800	5754700	2404700	9342000	34457000	0	0	0	0	0	13543000	0	8657100	75224000	3863600	4600300	9835900	17339000	10044000	11985000		+		1	1	1	0	0	0	37.237	0.0094629	1.7231
2677400000	2453600000	1982700000	82360000	1783300000	0	876960000	2472200000	2072300000	2181500000	539260000	909030000	1119500000	1811600000	1881400000	1171100000	1110300000	14543000	517090000	97278000	31138000	44383000	1478600000	1803100000	1504100000	2068200000	1450900000	102080000	1796700000	2117700000	2019000000	2710900000	1418900000	87207000	614870000	10485000	1811900000	1384100000		+		3	3	3	0	0	0	274.93	0.0075423	1.8266
0	0	0	0	0	0	0	0	0	0	0	0	0	9143400	0	0	0	0	0	0	0	0	0	0	0	0	0	0	17497000	0	16323000	0	13284000	0	0	0	0	0	+	+		1	1	1	0	0	0	41.493	1	-2
43804000	154080000	363340000	15559000	0	3500400	1124400000	257690000	241350000	407210000	3104700	45038000	80367000	25507000	9911500	72681000	110950000	0	67631000	38396000	118580000	76712000	5893700	124720000	229570000	120360000	1684100	481280	3613100	129980000	0	75789000	75905000	249650000	10160000	81704000	6396800	118150000	+	+		2	2	2	0	0	0	322.23	1	-2
0	55249000	54972000	0	0	0	0	29357000	0	90569000	0	0	0	75415000	0	70197000	0	0	0	0	0	0	0	0	0	0	0	0	0	0	0	0	0	51046000	0	78123000	57068000	28657000	+	+		1	1	1	0	0	0	58.475	1	-2
0	0	0	14890000	0	0	0	0	0	0	0	0	0	25556000	0	0	0	0	0	0	0	0	0	0	0	0	0	0	7553100	16034000	6346100	0	16180000	0	16880000	0	18563000	37023000		+		1	1	1	0	0	0	24.789	0.0063241	1.9098
33270000	84309000	35445000	0	25827000	31787000	23548000	29332000	39209000	30791000	44124000	25507000	17406000	29800000	0	26994000	2254300	0	0	26027000	30001000	0	25684000	71993000	60538000	67477000	430310000	106790000	49695000	60182000	40400000	0	24122000	0	30941000	27223000	54921000	0		+		1	1	1	0	0	0	27.736	0.0046359	2.1204
80912000	0	44166000	6693800	23156000	13046000	0	50082000	39206000	82385000	19253000	31696000	4191900	36087000	127140000	26480000	8442800	0	0	0	0	84919000	84284000	0	0	21222000	12197000	34962000	53183000	73602000	22586000	0	38238000	83616000	20300000	85411000	32098000	73160000		+		3	3	3	0	0	0	129.34	0.0058324	1.9557
460350000	298420000	51921000	166260000	151700000	418690000	184330000	144640000	205920000	161100000	156610000	0	202120000	279220000	159950000	96697000	69152000	97026000	179430000	155000000	237200000	272140000	327580000	78142000	84205000	29387000	24404000	53484000	527010000	112920000	21639000	49421000	37228000	0	0	0	78040000	92795000	+	+		1	1	1	0	0	0	36.562	1	-2
0	0	64934000	0	0	36075000	0	0	0	73629000	0	0	0	0	0	0	0	0	0	0	0	0	0	0	0	0	0	0	0	0	0	0	0	0	0	0	0	0	+	+		1	1	1	0	0	0	393.36	1	-2
0	0	36957000	40713000	0	0	0	0	0	22822000	31655000	17974000	0	0	0	0	0	0	0	0	0	0	0	0	0	0	0	0	0	0	0	0	11240000	10588000	0	5433500	0	0	+	+		2	2	2	0	0	0	141.32	1	-2
0	0	0	0	5273100	0	3397000	0	0	28740000	0	0	0	2410600	0	0	0	0	0	0	0	0	0	0	0	0	0	0	0	0	0	0	0	0	0	0	0	0	+	+		1	1	1	0	0	0	76.067	1	-2
0	3904300	7128500	5779000	8377000	3226500	0	0	5160000	5394500	10867000	9117800	4915300	2755400	9242400	5943000	0	0	6370000	9373300	0	5335300	4192700	0	0	0	0	0	0	12720000	7100600	0	4660300	4688800	8137300	7207200	0	10512000		+		1	1	1	0	0	0	38.65	0.0028612	2.4719
186560000	154370000	234060000	69155000	72563000	61953000	33324000	208460000	139450000	207460000	83996000	229140000	146320000	49594000	507390000	81779000	110840000	0	485560000	46763000	116950000	96587000	103900000	73528000	86258000	77003000	51893000	154820000	71356000	57830000	46507000	56220000	16235000	243180000	94094000	62074000	196820000	125820000		+		5	5	5	0	0	0	492.62	0.0017959	2.7786
87829000	90202000	0	0	0	0	0	64630000	51519000	0	38473000	0	0	0	99388000	0	0	0	85373000	95198000	79109000	134220000	75032000	0	0	0	0	0	0	88939000	0	120750000	0	0	0	81365000	0	75503000		+		2	2	2	0	0	0	125.23	0.0051421	2.0693
0	0	0	0	18610000	0	10545000	6758900	0	0	0	9832100	11747000	0	0	0	11778000	0	0	0	0	0	0	0	0	0	0	0	0	0	0	0	0	0	0	9127300	0	0		+		1	1	1	0	0	0	77.394	0.008273	1.7854
0	0	0	0	7036700	0	0	0	0	0	4085300	0	0	0	0	0	0	0	0	0	0	0	0	0	0	0	0	0	0	0	0	0	0	0	0	0	0	0		+		1	1	1	0	0	0	60.377	0.0065411	1.8742
18228000	8736800	16625000	14802000	9318600	12428000	13950000	11781000	7376500	16632000	20866000	16673000	10869000	20799000	17565000	16345000	7718000	27206000	13314000	15715000	25737000	31348000	11284000	6272700	9034800	5678000	5074000	9733800	12570000	10563000	8372300	6185900	11740000	20407000	8600400	21046000	14767000	15711000		+		1	1	1	0	0	0	134.05	0.00092793	3.0775
181360000	39520000	191200000	102780000	37800000	225480000	85721000	100470000	0	87045000	68421000	153230000	0	0	495980000	80073000	113440000	0	56544000	0	0	159620000	212150000	105320000	186030000	161590000	101920000	84448000	171060000	105590000	166870000	126350000	63814000	135130000	0	108480000	236610000	16949000		+		10	10	9	0	0	0	3653	0.0012315	3.0455
0	0	0	0	0	0	0	0	0	0	0	0	0	0	0	0	0	0	0	0	0	0	0	0	0	0	0	0	0	0	0	0	0	0	0	0	0	0	+	+		1	1	1	0	0	0	33.882	1	-2
0	0	0	0	8142400	0	0	0	6437900	7075200	6073900	0	0	0	0	0	0	0	0	0	0	0	0	0	0	0	0	0	0	0	0	0	0	0	0	0	0	0	+	+		1	1	1	0	0	0	34.275	1	-2
5310700	0	3289200	0	0	0	0	6589500	0	0	0	0	0	0	0	0	0	0	0	0	0	0	0	0	0	0	0	0	0	0	0	0	0	0	0	0	0	0	+	+		1	1	1	0	0	0	69.108	1	-2
34159000	0	42283000	0	0	0	0	46375000	0	0	0	0	0	0	0	0	31814000	0	0	0	0	0	0	31943000	30446000	35189000	42653000	28762000	41338000	34712000	33894000	40498000	30469000	32574000	29910000	0	32588000	32647000	+	+		1	1	1	0	0	0	70.91	1	-2
17157000	0	14864000	0	0	0	0	6726800	0	0	0	0	0	0	0	0	0	0	0	0	0	0	0	0	0	0	0	0	0	0	0	0	11098000	0	6431200	0	9433600	0		+		1	1	1	0	0	0	41.489	0.0067992	1.8701
346920000	130280000	280590000	325140000	225910000	104640000	102300000	67005000	214350000	217970000	288400000	41721000	136700000	61432000	78327000	110620000	86490000	242240000	255210000	279960000	166960000	154830000	136320000	143820000	181790000	192100000	182960000	110640000	101390000	129140000	157330000	101590000	115940000	199140000	214680000	409960000	174170000	283850000		+		1	1	1	0	0	0	79.169	0.0035724	2.1689
0	0	0	0	0	0	0	0	0	0	0	0	0	0	0	0	0	0	0	9856400	0	6164400	12335000	0	0	0	0	0	0	0	0	0	0	0	0	0	0	0		+		1	1	1	0	0	0	71.114	0.0080394	1.8037
0	0	0	0	0	0	0	0	0	0	0	0	0	101050000	0	70996000	73030000	0	51144000	70452000	0	173330000	37757000	0	0	0	0	0	0	0	0	0	0	0	0	0	0	0	+	+		1	1	1	0	0	0	12.923	1	-2
0	13259000	0	0	10234000	0	10824000	0	0	0	0	13628000	0	10573000	22348000	0	12517000	0	11110000	0	10251000	10510000	12702000	0	0	0	0	0	0	0	0	0	0	0	0	0	0	8864400	+	+		1	1	1	0	0	0	58.41	1	-2
0	0	0	2874800	0	0	0	0	0	0	0	0	0	0	0	0	0	0	0	0	0	0	3704700	0	0	0	0	0	0	0	0	0	0	0	0	0	0	0		+		1	1	1	0	0	0	91.154	0.0087494	1.7564
13107000	12021000	17016000	0	9454400	11769000	0	11950000	0	14599000	0	0	0	7615400	8502800	11066000	9255100	0	0	8417500	0	0	0	22109000	12672000	12495000	11126000	10550000	13029000	11923000	14537000	0	12149000	14168000	12506000	10095000	0	12284000		+		2	2	2	0	0	0	94.436	0.0097187	1.7219
3900400	2795600	1591600	31277000	10041000	1405500	4880200	0	5895700	2125100	864700	0	3671000	15947000	3118200	2723800	4911700	0	10037000	0	9139300	804230	4407700	5149000	2225800	2712800	0	3530700	1015400	5344700	2274900	0	582520	1834300	0	2844200	951110	2228100	+	+		2	2	2	0	0	0	68.649	1	-2
363630000	0	235580000	0	145320000	106510000	143960000	155270000	0	7557400	0	150580000	158310000	124520000	108740000	179510000	171590000	201020000	267050000	517810000	0	304470000	0	225450000	221830000	302810000	298270000	224070000	239710000	341720000	229840000	333210000	246950000	122590000	0	289540000	0	0		+		1	1	1	0	0	0	55.447	0.004368	2.1238
4854100	0	0	0	152870000	0	0	118030000	334160000	0	4962600	2174900	0	0	0	0	85253000	0	106000000	0	0	0	0	0	0	6625100	0	0	156570000	0	140330000	0	168660000	112710000	0	0	0	0	+	+		1	1	1	0	0	0	170.45	1	-2
0	7210300	5263200	14080000	0	0	0	61941000	31908000	3837800	0	0	0	4916000	11233000	0	0	0	0	4529600	0	6569300	39614000	0	26850000	0	0	0	12285000	7076400	0	29027000	0	2909300	8430000	37970000	1883500	0		+		2	2	2	0	0	0	43.373	0.00065295	3.5959
0	0	28515000	0	0	0	131490000	0	0	89004000	149670000	0	0	0	0	66553000	0	0	0	0	0	0	0	0	6658200	0	8364900	0	141760000	0	0	156830000	0	0	120490000	0	209370000	0		+		1	1	1	0	0	0	82.932	0.003843	2.1597
0	0	0	0	0	0	0	0	0	0	0	1630600	0	0	0	0	0	0	0	0	0	0	0	0	0	0	0	0	0	0	0	0	0	0	0	0	0	0	+	+		1	1	1	0	0	0	47.931	1	-2
0	0	33388000	0	0	1237600	20390000	0	0	0	0	3782100	0	0	0	4244400	0	0	874580	2745200	0	7385600	12114000	24403000	12084000	16324000	30195000	7948400	12144000	10055000	10598000	14914000	16494000	0	0	0	2494000	8718000		+		1	1	1	0	0	0	76.886	0.0023697	2.6823
45239000	17573000	13929000	207520000	40957000	1683300	0	247170000	160690000	4494600	1103900	3382700	41210000	1147600	10985000	13919000	13557000	10293000	9935900	14705000	42205000	20818000	197740000	18156000	9510200	18937000	30369000	24693000	15865000	17547000	11744000	201830000	3215000	8642900	11269000	10308000	10383000	0				1	1	1	13.7	13.7	13.7	12.737	0	7.6027
5848300	5865800	4260700	8706400	9573000	5589000	5269600	7527800	8035100	6950100	6194200	0	13594000	0	8850400	5694000	9786600	7115100	6676400	7090900	6716000	7669800	9781500	24161000	14569000	19480000	26727000	16893000	9693400	0	15210000	0	4438100	9121100	5141800	10572000	3987300	9356100				4	4	4	6	6	6	117.97	0	178.43
43440000	0	31839000	28174000	23314000	21776000	37186000	31547000	24020000	21333000	19643000	27027000	38087000	36748000	19324000	0	28629000	0	51247000	30135000	53682000	34146000	13074000	23682000	0	30400000	16077000	15556000	32597000	23887000	22735000	33358000	33066000	19005000	30111000	24046000	27570000	65614000				5	5	5	8.5	8.5	8.5	104.71	0.000333	3.8773
2702200	0	2998400	2034800	938780	3191900	3432800	1642400	0	3020800	2459300	0	2428900	4061400	3087300	0	0	2075600	0	1903300	0	3816000	1747200	2883100	2498300	3947800	3138700	1744800	3832300	2711300	4913500	3336900	1901800	2833000	1614600	2905200	3189400	0				1	1	1	3.3	3.3	3.3	88.087	0	5.9907
46291000	50776000	0	35884000	127000000	25297000	38771000	7934400	26775000	13412000	39404000	26984000	64074000	29164000	29364000	43274000	133980000	22839000	32267000	21238000	47431000	52595000	46814000	34864000	15181000	74211000	30512000	29331000	33672000	33200000	37961000	47934000	28437000	31840000	40433000	31285000	33818000	26687000				4	4	4	23.6	23.6	23.6	36.9	0	172.18
47027000	39507000	38284000	42098000	56606000	36554000	25993000	39962000	49293000	22663000	55994000	42011000	45719000	26972000	59499000	63180000	22462000	36232000	41576000	57109000	47532000	28887000	47273000	31471000	32345000	21746000	19685000	22234000	33023000	28126000	29036000	39190000	24278000	15702000	15829000	29392000	23959000	58057000				4	4	4	15	15	15	67.867	0	37.484
2211000	3263200	1047400	2469600	2462200	1492100	1198700	2054900	1138200	1314200	640160	2625300	381190	993890	0	0	0	0	2811700	2985700	0	2513200	941340	0	0	0	0	0	0	0	0	0	1142400	2182400	0	5005000	2513700	3290200				1	1	1	4.6	4.6	4.6	33.356	0.0014984	2.7878
23668000	30853000	51075000	23630000	26921000	35691000	140990000	24431000	34659000	26257000	49513000	56041000	27999000	45920000	24444000	57096000	63208000	0	65306000	126280000	81567000	4592700	47431000	34702000	50198000	18564000	35456000	49733000	32252000	28584000	35126000	15818000	36756000	47446000	47220000	26342000	25203000	28923000				3	3	3	34.7	34.7	34.7	13.322	0	7.9013
142400000	172830000	141470000	92517000	97843000	95753000	139280000	142240000	252150000	118250000	77690000	188600000	31327000	235470000	128230000	107630000	141520000	326770000	98508000	98214000	105500000	110060000	75999000	114710000	111780000	131870000	157490000	133770000	159380000	136740000	152700000	173740000	149170000	148640000	158130000	75337000	122120000	106950000				4	4	4	65.2	65.2	65.2	10.803	0	23.257
40344000	39547000	171260000	13105000	14889000	89290000	76304000	55779000	26246000	47551000	30226000	43828000	27118000	56042000	51770000	28910000	64101000	0	22902000	52619000	20619000	61625000	17378000	43589000	53294000	59423000	58080000	33755000	53697000	54584000	63014000	60034000	24509000	63851000	23359000	58138000	48029000	114850000				1	1	1	30.9	30.9	30.9	6.2484	0	6.1088
1406400	1053000	298420	199200	1649400	1047900	1308000	312340	237600	421100	285810	1746800	417440	5038700	0	210980	116350000	1621000	1943200	605190	763600	11902000	402440	853930	882550	739980	880790	545370	1918200	833350	1727000	1298600	3736900	989640	1116700	996280	1049000	1417800				1	1	1	22.8	22.8	22.8	14.277	0	8.49
38145000	35545000	39443000	23606000	78311000	52249000	9251700	37161000	25082000	4526700	34886000	56369000	42571000	30505000	56684000	41556000	33096000	340000000	93490000	33495000	56295000	37168000	80356000	60757000	79277000	43760000	29156000	42439000	37853000	30916000	30048000	36030000	53790000	72005000	51329000	86376000	49297000	53047000				5	5	5	40.1	40.1	40.1	29.98	0	323.31
160630000	182610000	140780000	41844000	161620000	61074000	84383000	305370000	151110000	187630000	55360000	50534000	169220000	39203000	77785000	44816000	58673000	131960000	55606000	44448000	60692000	53421000	71180000	96959000	74640000	96581000	124280000	105670000	73783000	95886000	112390000	96761000	165570000	101120000	94418000	62184000	88820000	51368000				2	2	2	10.3	10.3	10.3	23.33	0	26.037
23614000	80968000	202040000	66730000	0	0	0	139280000	168920000	131420000	0	6570700	63901000	140280000	95520000	144220000	94620000	132090000	21873000	164110000	43507000	74460000	0	154860000	167740000	192560000	247970000	139490000	152290000	204930000	147080000	201570000	195290000	34606000	132540000	53405000	94528000	132220000				1	1	1	6.6	6.6	6.6	15.798	0.0043644	2.1224
0	21604000	0	61347000	101600000	0	73461000	100680000	0	142320000	41610000	101790000	67363000	157340000	188370000	0	182950000	0	81718000	60936000	0	0	0	192800000	194500000	223970000	237350000	234970000	206940000	93003000	248800000	0	0	8478900	254730000	0	0	64559000				2	2	2	26.9	26.9	26.9	13.373	0.0025847	2.4951
4641400	30680000	16511000	56142000	536130	18596000	18334000	9577900	0	7673800	5780700	0	15915000	5243700	16813000	24450000	13982000	0	0	11074000	9093700	3473800	837460	36551000	10764000	24938000	23504000	27374000	15899000	20757000	17576000	24357000	27398000	14709000	11052000	22976000	7076900	10105000				6	6	1	24	24	6.1	60.688	0	21.216
19136000	15962000	11397000	19480000	13352000	18411000	18462000	14583000	23838000	12441000	17110000	14615000	4452700	16429000	15685000	12457000	11719000	9421800	14964000	25176000	17691000	22155000	6759100	27280000	7264800	8106600	6365100	10509000	18839000	5376400	12384000	6470900	15478000	13500000	14792000	7198200	12777000	7985900				7	7	7	33.7	33.7	33.7	47.82	0	14.167
0	0	0	0	10209000	0	0	0	0	0	0	0	2394100	0	0	0	0	0	0	0	0	0	0	0	0	0	0	0	0	0	0	0	0	0	0	0	0	0				1	1	1	2	2	2	170.58	0.00032992	3.727
3395800	1800900	0	2405000	17550000	7865600	5838300	1656500	2950700	1472700	3675300	0	7262900	3880300	0	0	0	0	2932100	3964600	3421300	3097100	3366600	3331900	0	0	2803200	6614400	0	2048100	0	0	3171000	4233600	2845500	3817700	2706200	1332300				1	1	1	7.3	7.3	7.3	47.421	0	14.342
22609000	26397000	0	0	18073000	32659000	19417000	13326000	8269500	0	23734000	25377000	25277000	44951000	28757000	28564000	27105000	0	46945000	24895000	43027000	13566000	38987000	26640000	22849000	0	13334000	24501000	19810000	0	11088000	0	3421300	0	8258700	25202000	17067000	35367000				2	2	2	27.8	27.8	27.8	17.843	0	44.808
10714000	7086200	7097100	10157000	7941000	10748000	5512600	1496200	8785700	4365400	14607000	3346200	11491000	0	3753100	17936000	4194900	0	10999000	0	9369100	0	0	4853700	8443000	9289600	12171000	17412000	14571000	10987000	10489000	0	5444600	5764000	8134900	2500500	9064600	0				10	10	10	6.1	6.1	6.1	254.81	0	9.9772
0	20997000	23093000	8747900	19124000	39686000	20078000	21910000	9684400	29438000	11885000	17404000	11175000	13644000	22117000	0	4474000	13754000	0	0	0	0	0	20019000	33925000	13810000	18921000	23739000	33303000	0	25477000	0	11608000	25504000	10600000	25351000	13288000	12160000				5	4	4	11	9.9	9.9	81.56	0	10.92
2387900	4259200	4053000	6666000	3405700	6396500	8356500	4334400	2582500	4043000	5436700	1570100	6159200	6519400	0	10287000	3002800	0	4714500	0	0	4230900	0	4996900	5698100	5730900	4447400	9548200	0	3927500	10744000	3058700	5074700	4912400	4333500	4634700	5353300	3974700				3	3	3	3.8	3.8	3.8	116.94	0.00035625	4.9122
0	38059000	0	0	0	0	0	0	0	0	0	0	0	0	0	0	0	0	0	0	0	0	18995000	0	0	0	0	0	0	0	0	0	0	65868000	46374000	6470300	0	19418000				1	1	1	0.7	0.7	0.7	159.09	0.0092213	1.7323
14551000	9716200	23352000	4870100	0	0	0	10386000	12344000	12384000	0	0	0	0	0	0	35197000	0	0	0	0	0	0	0	0	42574000	6377000	12574000	0	20829000	12793000	0	11550000	18136000	11976000	10807000	14706000	20040000				3	3	3	1.5	1.5	1.5	377.34	0.0006217	3.1424
7761000	13886000	18941000	6592400	24674000	9104300	9719300	8048400	10538000	14250000	8738700	36405000	8923900	0	13127000	15414000	12001000	18734000	18277000	18604000	9912300	15100000	21508000	24361000	14858000	25938000	26571000	34625000	34970000	28468000	29476000	21118000	19440000	0	10281000	8385200	14428000	17723000				5	5	5	14	14	14	50.098	0	8.0543
10261000	13203000	15055000	18844000	9640200	13974000	7954300	13051000	15282000	17983000	14744000	19474000	9605300	7907500	12342000	14224000	18029000	1579700	0	11055000	10214000	8812700	13648000	18257000	15103000	10318000	12304000	12052000	10440000	12909000	13260000	15867000	21099000	16759000	9527900	16768000	4370900	9172500				4	4	4	12.5	12.5	12.5	50.097	0	22.625
231300000	234190000	246910000	226210000	220430000	272500000	264250000	293800000	209950000	295270000	444010000	333480000	281540000	263760000	283410000	301650000	334470000	259210000	339970000	287990000	342620000	393700000	295960000	207330000	373200000	272640000	581020000	231670000	288910000	291970000	425720000	289800000	337180000	262100000	311960000	363850000	296140000	363920000				9	9	8	51.2	51.2	45.3	35.624	0	323.31
34731000	30175000	49804000	31828000	40369000	40713000	19020000	50688000	28450000	23751000	25009000	43561000	26631000	30453000	36430000	49320000	24340000	20667000	57063000	37702000	26695000	56108000	28106000	23773000	32991000	42246000	16001000	24808000	32130000	22162000	28463000	10114000	32476000	35043000	36625000	56172000	45900000	30303000				8	8	8	29.6	29.6	29.6	64.901	0	28.875
40260000	27339000	44449000	51693000	29351000	10457000	47950000	38471000	56716000	36769000	50682000	55637000	116600000	42429000	41155000	28039000	32494000	0	7492300	46054000	62923000	88507000	83116000	64765000	37847000	31624000	77865000	39506000	56225000	64942000	39223000	37358000	57230000	30020000	48151000	51756000	37519000	28252000				9	9	9	18.3	18.3	18.3	113.29	0	14.915
32204000	38893000	21622000	56876000	44292000	30841000	28987000	36972000	21007000	35786000	40147000	32599000	27667000	46619000	38388000	33243000	35701000	45917000	55671000	56106000	58451000	39849000	32321000	25484000	27188000	31527000	37793000	39378000	28242000	29014000	32017000	46488000	31838000	20032000	35824000	35277000	34486000	46440000				6	6	6	36.1	36.1	36.1	41.025	0	23.942
1097900	1327300	1908100	0	0	0	0	2554400	1385200	0	0	0	0	1209700	0	0	0	0	1610400	0	0	1426200	0	0	0	0	0	0	0	566710	0	0	185000	1983500	0	0	0	0				2	2	2	13	13	13	28.661	0.00062016	3.1116
882240000	466550000	313350000	142840000	212390000	198160000	237140000	452660000	374440000	321430000	349350000	365340000	250470000	244050000	279660000	195750000	281240000	275290000	12489000	284680000	446850000	694050000	163140000	242180000	271230000	254850000	253510000	156390000	179940000	276400000	328460000	351640000	280950000	382140000	392870000	402710000	39551000	928620000				4	4	3	20.2	20.2	15.2	27.053	0	45.173
1841700	1451600	0	0	0	649380	0	0	0	0	0	0	0	322840	0	630830	1363600	0	0	525220	0	0	1191600	0	0	0	0	0	0	0	0	0	0	4138900	192150	0	1523500	0				1	1	1	3.3	3.3	3.3	33.886	0.0030362	2.1868
3925100	10281000	11966000	0	4160000	0	14746000	9344100	7414000	9225100	0	7029700	4655500	0	20630000	7765100	6389200	0	9728000	6667600	11370000	8007600	9081500	5560900	2389000	13503000	11076000	7707400	15366000	13010000	10777000	7715200	9568400	10007000	4004600	6966500	5062100	3995400				5	5	5	16.1	16.1	16.1	66.217	0	6.9883
655390000	806380000	844970000	545390000	446820000	499770000	805220000	542570000	664930000	814780000	961820000	691460000	587040000	627810000	808470000	664970000	679420000	998910000	914480000	683170000	689210000	1043200000	616110000	770980000	663810000	628580000	1116900000	630320000	896920000	921290000	932310000	646170000	1205200000	997820000	654560000	708400000	1003200000	729770000				14	14	14	40.3	40.3	40.3	56.809	0	323.31
14212000	0	12261000	0	0	0	7518600	5621800	0	0	7842800	0	0	0	8078600	0	0	0	0	0	0	0	0	6997600	0	0	0	0	6421200	0	0	8252900	0	0	0	0	0	0				2	2	2	14.7	14.7	14.7	45.159	0.00034662	4.4296
0	1553300	0	0	0	0	0	1276700	2130000	0	0	0	0	0	0	0	0	0	0	0	0	0	0	0	0	1250600	871250	0	0	0	0	0	0	0	0	0	0	0				2	2	2	4.8	4.8	4.8	70.393	0	7.6206
37969000	47368000	19273000	39289000	13742000	9295600	5446700	25880000	42982000	27306000	19821000	8013400	5012100	10955000	15210000	17789000	12366000	28942000	17471000	15852000	26177000	18532000	20460000	11298000	16938000	48429000	12158000	12407000	22477000	9998600	14403000	11175000	13483000	27743000	20671000	11691000	14206000	32508000				12	12	12	8.6	8.6	8.6	266.38	0	54.497
321420000	197880000	169910000	345140000	243720000	160540000	258040000	227350000	145660000	198250000	162800000	216410000	192820000	181950000	201240000	204940000	122250000	145230000	173600000	113060000	136860000	128940000	75457000	159890000	157910000	184540000	129030000	127250000	132610000	183710000	140020000	200810000	165040000	249750000	184560000	305740000	194050000	229020000				9	9	9	38.4	38.4	38.4	46.871	0	218.04
46376000	181990000	229910000	85756000	65443000	75605000	133880000	295780000	143820000	202620000	151980000	27848000	163810000	96513000	129590000	111980000	385590000	0	89852000	48835000	101860000	122620000	52974000	173850000	117610000	211610000	219320000	203790000	211640000	117420000	155670000	165460000	138940000	29821000	137740000	410170000	170090000	91284000	+			1	1	1	11.2	11.2	11.2	14.688	1	-2
0	0	0	0	28583000	0	35261000	0	12784000	21541000	0	37906000	0	36474000	0	7797200	0	0	0	0	0	0	27053000	0	0	0	0	0	0	0	0	19668000	17731000	25596000	16677000	25699000	20810000	0	+			2	2	2	3.5	3.5	3.5	134.02	1	-2
60044000	70963000	68377000	28281000	60990000	90970000	57166000	35909000	30639000	16964000	54901000	74626000	48528000	72623000	73557000	98492000	29720000	116140000	74702000	75050000	80843000	75931000	50685000	50036000	76401000	45489000	26002000	48635000	73148000	90870000	102610000	68395000	42701000	47593000	55214000	31659000	110750000	101120000				3	3	3	15.3	15.3	15.3	34.006	0	88.804
42125000	37840000	26420000	64898000	39557000	57530000	53630000	29442000	32056000	54618000	28348000	59102000	55366000	55048000	42445000	10238000	42737000	17312000	37850000	29719000	25484000	33082000	29645000	28931000	20851000	20826000	34427000	24510000	46438000	28334000	23428000	20892000	37869000	32633000	23840000	23834000	28383000	27757000				3	3	3	20.7	20.7	20.7	33.62	0	117.04
54334000	83761000	29831000	54354000	50583000	26005000	44637000	39738000	46765000	22911000	36462000	31763000	81764000	20055000	19348000	28612000	32029000	0	41087000	40325000	38105000	35536000	36938000	15821000	40633000	43277000	49987000	28869000	0	27337000	0	56485000	23022000	32545000	36518000	64842000	31938000	41220000				3	3	3	9.8	9.8	9.8	52.47	0	142.71
1498000	14814000	8750000	2362100	10656000	6136100	3242800	8213600	1747200	0	14522000	0	7956600	0	8074600	7636900	6048000	0	2375100	0	5067700	0	0	4839400	8585100	0	0	3705000	5068200	9013200	5440000	8089700	8274700	0	19282000	22836000	11942000	0				1	1	1	3.1	3.1	3.1	30.293	0.0053519	2.0155
15918000	10840000	6908200	13348000	11023000	10812000	0	8438800	22916000	17614000	5336300	23060000	12474000	8887400	0	0	14076000	0	0	14446000	0	16641000	15840000	10012000	14868000	10686000	16597000	11736000	11340000	10525000	16813000	5557200	23292000	14991000	17562000	0	13388000	12778000				2	2	2	10.4	10.4	10.4	36.794	0.00036805	5.5738
462790000	213670000	240190000	127620000	180060000	196260000	150650000	222920000	244460000	364710000	222340000	554010000	227920000	325860000	222590000	254940000	168700000	185320000	119320000	158040000	227020000	251710000	145590000	247370000	268100000	321810000	229800000	135600000	249320000	214010000	345900000	324750000	141430000	127030000	161130000	131430000	252430000	257730000				4	2	2	10.6	6.7	6.7	45.517	0	16.182
82213000	0	83208000	0	33389000	32711000	23322000	69309000	0	36518000	29168000	16493000	27679000	27583000	72509000	30365000	34340000	36407000	0	30596000	29768000	0	0	65250000	48933000	59828000	55838000	51618000	0	46128000	25537000	0	0	19723000	56292000	0	31904000	0				3	2	2	11.7	8.4	8.4	34.803	0.0080207	1.7902
12911000	20563000	13180000	21506000	6639800	5447700	8899800	14107000	14498000	21580000	18532000	13661000	13228000	12349000	17156000	10774000	23439000	24930000	20072000	16428000	15203000	7237600	0	14057000	11569000	31798000	14434000	15181000	19414000	12673000	20373000	18592000	17616000	0	7796200	11107000	8186600	12770000				6	6	6	5.6	5.6	5.6	215.74	0	8.4189
20354000	32978000	33389000	24892000	16100000	28171000	29640000	27963000	17250000	22184000	22990000	41393000	35000000	43776000	20382000	23727000	22931000	4393500	48218000	37290000	42848000	1946200	19850000	31770000	46451000	27864000	36800000	30367000	53644000	25134000	21527000	27523000	21839000	22614000	20696000	20557000	21527000	25285000				5	5	5	30.1	30.1	30.1	36.056	0	41.517
0	0	0	0	0	0	0	0	0	0	0	0	0	0	0	0	0	0	0	0	0	0	0	0	0	0	0	0	0	0	0	0	0	0	0	0	0	0	+			7	1	1	19.4	3.8	3.8	49.572	1	-2
8505800	3371700	7976700	7618900	6458500	14689000	8580300	7216000	4550700	8011300	6679500	8240900	6607200	6809000	7142000	10193000	7461600	6337200	3643200	4987200	10812000	18237000	9628400	6672200	4584900	8052500	13968000	5251800	19881000	6910800	4798000	3720900	13498000	8187700	4465500	8348900	9536100	7360900				4	4	4	3.6	3.6	3.6	230.53	0	10.055
57700000	48394000	40569000	68495000	32513000	45976000	32704000	32312000	65696000	26858000	40990000	63491000	31459000	49250000	36263000	32318000	47861000	59039000	48304000	61177000	43635000	88014000	69755000	51183000	66753000	48439000	62302000	62622000	88193000	69867000	54558000	39259000	58563000	52901000	53149000	46237000	55495000	30744000				6	6	6	39.9	39.9	39.9	35.865	0	67.905
29306000	65257000	0	98264000	62193000	9367500	6302800	44533000	9148500	0	28587000	17975000	128120000	17781000	76237000	32953000	81412000	0	26455000	23855000	22104000	42425000	45569000	38575000	37476000	113620000	25840000	11241000	10769000	28620000	15107000	36817000	10732000	0	6820500	4457300	3900600	0				9	8	8	19.1	17.4	17.4	80.327	0	80.753
171350000	93286000	104010000	150420000	192300000	180300000	107090000	126840000	136740000	91983000	210280000	168160000	159440000	146030000	119080000	107310000	136610000	178150000	127160000	124860000	114690000	127570000	103100000	187370000	173410000	136380000	167000000	112710000	114680000	110560000	164140000	121920000	113720000	101080000	125190000	192280000	135980000	138400000				10	10	10	39.7	39.7	39.7	46.268	0	140.38
1341400	867220	0	1349300	849180	1619300	0	2509400	0	0	0	0	0	1983200	0	3881000	0	0	0	0	2905600	0	0	0	0	0	0	1703400	3625100	1773900	0	0	0	0	0	0	2610400	827570				1	1	1	2.9	2.9	2.9	87.434	0.00033124	3.7939
5217700	0	0	0	2503700	7492900	4505200	895480	1170400	4597200	14001000	0	0	2503300	3985700	5260800	0	0	0	59353000	0	3813400	0	5950200	0	0	0	900440	3730000	1896700	0	0	3986400	0	6280000	0	4087500	10117000				3	3	1	5.2	5.2	1.7	113.84	0.003304	2.1762
1183600	3600100	0	6442200	391840	731650	0	3022300	2762400	2126200	14629000	0	0	7118400	6821600	2742000	3249900	0	5004300	2672900	0	2222300	830940	0	0	0	0	0	0	2586000	0	3335900	2113600	3382000	2457000	1665900	2415000	0				1	1	1	7.9	7.9	7.9	26.428	0	9.797
118590000	109250000	83134000	33067000	103490000	97646000	125660000	64400000	42074000	106300000	79281000	166550000	56084000	73522000	135800000	117430000	40085000	267590000	164120000	118090000	71994000	171920000	131430000	74897000	44915000	118140000	110300000	84346000	100580000	18233000	72309000	53653000	141350000	109650000	80516000	81386000	101110000	116680000				4	4	4	51.5	51.5	51.5	21.547	0	247.75
30789000	37016000	43263000	8285000	28822000	8315000	30650000	16415000	20933000	16020000	12201000	12260000	20542000	17751000	24531000	32873000	20102000	34908000	68271000	22690000	0	4609600	22715000	38590000	70647000	29235000	27830000	72250000	60876000	54992000	44092000	72413000	35978000	33758000	37864000	64661000	35479000	27193000				4	4	4	20.2	20.2	20.2	37.35	0	76.643
53012000	55630000	34482000	28827000	61696000	48789000	73556000	26458000	51366000	42707000	77393000	35369000	40140000	88728000	86666000	48270000	58762000	84749000	0	67352000	63383000	52180000	24767000	52335000	61249000	89385000	62230000	49160000	66794000	48835000	62568000	40348000	49768000	74308000	62106000	61489000	71929000	51675000				5	5	5	12.4	12.4	12.4	83.989	0	39.375
12155000	0	15076000	0	7734800	0	0	7959300	0	29587000	16978000	7133200	0	14694000	0	12916000	0	0	1416100	0	9654100	0	0	17538000	16602000	30279000	44995000	27971000	19674000	18546000	24226000	19515000	19867000	11522000	18507000	12228000	33588000	14028000				3	3	3	4.9	4.9	4.9	91.732	0	5.8635
10480000	0	10268000	0	0	6377800	0	0	0	0	0	0	0	0	0	0	8489500	0	0	0	0	0	0	0	0	0	13479000	8628200	8965500	9054200	14617000	0	0	0	0	0	0	0				3	3	3	14.9	14.9	14.9	29.632	0.002584	2.4878
945990	0	1837500	0	0	2954700	2742000	1631000	1073400	1420300	0	1948600	1999900	0	1555500	0	1118100	0	0	1176300	0	0	870350	0	1026200	0	881310	1980100	861490	0	1512500	0	1317900	2378100	722640	2167700	0	1228400				2	2	2	3.9	3.9	3.9	105.04	0.00033818	4.0491
131960000	66710000	61386000	75622000	142910000	55058000	31219000	97489000	124270000	68141000	83039000	54558000	42164000	47012000	70186000	64718000	54974000	83179000	286500000	53417000	90734000	62126000	60579000	63283000	59883000	69661000	85194000	103030000	52367000	66241000	65483000	66405000	79474000	90536000	80883000	124070000	72512000	124510000				8	8	8	11.4	11.4	11.4	105.34	0	98.568
54491000	73476000	69714000	38775000	70322000	81818000	107000000	43208000	86592000	44291000	62999000	68541000	61670000	104230000	88524000	57431000	54244000	46032000	86483000	122560000	112550000	92923000	73556000	68122000	66531000	53684000	55912000	66370000	79387000	80480000	70308000	74172000	58266000	63011000	71886000	46732000	63001000	31440000				10	10	10	35.3	35.3	35.3	54.28	0	323.31
0	11285000	3613100	0	10476000	12064000	11730000	2053600	34017000	0	4930000	14601000	8390000	10939000	4566500	0	337880	0	73441000	0	0	1603800	0	18700000	15155000	0	22096000	24174000	14722000	23842000	26562000	0	13880000	0	17964000	0	4440700	0				1	1	1	8.9	8.9	8.9	18.766	0.0015083	2.8537
13905000	29816000	15067000	0	1905500	0	0	12503000	11202000	0	0	0	11327000	1466500	0	17853000	0	0	3556800	0	0	0	0	18041000	10755000	15084000	36579000	4352100	5726600	0	13117000	0	15311000	0	0	0	3326400	62796000				2	2	2	22.7	22.7	22.7	10.92	0.00062578	3.2007
30119000	90505000	86807000	30834000	42222000	40610000	76430000	61602000	55233000	83332000	99581000	42565000	37699000	43021000	50146000	74853000	45124000	68847000	81874000	54986000	49813000	180110000	28973000	58859000	81703000	69691000	70943000	165070000	90293000	64344000	113930000	54785000	109990000	38452000	72567000	58711000	101880000	179100000				4	4	4	38.5	38.5	38.5	18.518	0.00034364	4.2811
387760000	440530000	369210000	287300000	356810000	338580000	299700000	377670000	339790000	281660000	424010000	271030000	429110000	238400000	350920000	291250000	288060000	298410000	351270000	372070000	348080000	380280000	339880000	280080000	287990000	330730000	284160000	280230000	301160000	276910000	355040000	321090000	331690000	365900000	332830000	331170000	319730000	423990000				26	26	26	45.9	45.9	45.9	107.12	0	323.31
94319000	84253000	118320000	82313000	67331000	81088000	83325000	81138000	82974000	81791000	111010000	129290000	69142000	158380000	96680000	84312000	104490000	168890000	125290000	79126000	135540000	117610000	110090000	93102000	72970000	96453000	136660000	98274000	131650000	99362000	132280000	114520000	84807000	77041000	84292000	83594000	88909000	169800000				19	12	4	26.6	15.4	5.8	112.21	0	323.31
251080000	195710000	131390000	345600000	215480000	195440000	274000000	213500000	266710000	188280000	228810000	201460000	180150000	150640000	230940000	193210000	160220000	96037000	138500000	122370000	243130000	234660000	302830000	247020000	255670000	276490000	157000000	219680000	188340000	253580000	172910000	296360000	195450000	205760000	314200000	300320000	142100000	247120000				5	5	5	32.6	32.6	32.6	23.384	0	300.58
646570000	619400000	432620000	708720000	505070000	461530000	505470000	481110000	483260000	540400000	576480000	619210000	438540000	535270000	404680000	489330000	487490000	387660000	531300000	553400000	426420000	578250000	421030000	357010000	356460000	396040000	357310000	538890000	398800000	423920000	492660000	423390000	414180000	495440000	443490000	502370000	520250000	552650000				16	16	16	47.8	47.8	47.8	59.234	0	323.31
184300000	141630000	54341000	106140000	162980000	127890000	147870000	107470000	116780000	117780000	56727000	143910000	149840000	183120000	136760000	147730000	179430000	94246000	254700000	154220000	199400000	135870000	114580000	130380000	121540000	165550000	210570000	146490000	161360000	147910000	176840000	284470000	144050000	155880000	181770000	80287000	134690000	44078000				11	11	10	40.2	40.2	38.7	59.474	0	323.31
4721500	8610200	15721000	9856300	23134000	7713600	10033000	15644000	7994700	0	4875900	4908500	7091500	6484800	0	15299000	7437800	0	2092700	0	10314000	9639300	0	11910000	9914600	10579000	15146000	10565000	12512000	9399400	12908000	21074000	24028000	2252700	12992000	0	12701000	4320900				3	3	3	19.8	19.8	19.8	38.668	0	7.6534
109620000	168520000	155270000	113110000	65821000	20000000	57636000	69771000	100560000	105440000	39262000	27803000	98140000	65669000	65822000	76922000	95005000	0	68144000	71131000	62990000	45619000	107190000	69706000	72237000	77135000	78774000	82547000	82153000	90447000	108280000	95864000	79517000	173650000	65224000	64344000	73258000	114380000				6	6	6	12.9	12.9	12.9	80.237	0	109.05
349740000	304750000	311410000	330700000	310940000	415530000	371010000	257200000	252940000	342530000	371350000	350790000	305310000	416410000	336580000	345700000	346170000	577650000	457130000	385880000	428340000	449500000	501170000	360150000	489190000	413200000	386070000	389610000	410290000	379470000	480410000	349430000	321320000	326120000	280210000	400960000	344700000	379360000				23	23	11	48.5	48.5	28.9	104.31	0	323.31
5560700	7222000	9027800	2735400	3560200	10420000	9584900	7522100	3927800	6178900	2827600	12083000	6438300	2695000	5757800	6066500	5918800	0	5419300	7453400	7202900	0	7083200	0	2465200	12551000	6635700	0	6534900	1942800	5051900	0	5456800	7284600	5502000	1498200	8390300	7443400				3	3	1	37.1	37.1	10	16.415	0	11.2
51740000	43435000	42657000	54690000	28136000	33303000	47569000	45463000	31844000	45873000	28193000	25365000	27007000	38626000	33588000	37884000	21748000	0	31632000	42623000	30462000	0	68531000	24030000	18267000	38776000	0	0	76778000	26561000	30722000	20083000	17794000	25641000	29672000	24780000	25395000	28449000				6	6	6	11.9	11.9	11.9	79.791	0	9.0342
12945000	17880000	22157000	9908700	12875000	21152000	8585100	14072000	27522000	12753000	14946000	5793600	10718000	2950900	0	13106000	8240800	7077900	0	11586000	6513500	11639000	20859000	15237000	8297700	10947000	9558800	9201500	15798000	15337000	15736000	9324700	11523000	19003000	2203900	3160300	1709800	0				4	4	4	16.4	16.4	16.4	46.173	0	105.91
0	0	10544000	0	4838900	0	0	7253900	0	13724000	5494600	0	0	0	6459400	0	0	0	0	4031500	3576100	0	0	11885000	14718000	11227000	14717000	0	0	12487000	12612000	0	12677000	0	17734000	5922200	0	24535000				1	1	1	9.7	9.7	9.7	11.133	0.0085095	1.7602
22864000	0	7758400	5788100	1605700	0	0	5851700	4022500	3600200	5151800	2315900	0	1303600	0	1398300	0	2652900	0	0	0	0	0	0	0	0	1638300	0	3873000	0	5202100	0	3767100	4303800	3785300	4834800	0	3477800				10	1	1	13.4	0.9	0.9	160.75	0.004902	2.0995
36758000	50483000	54688000	22443000	52168000	30339000	23031000	83299000	20487000	17421000	15799000	60212000	36888000	36197000	36881000	44951000	12392000	40539000	35961000	23226000	47500000	50664000	37341000	31969000	57872000	22057000	72967000	22613000	21382000	18289000	41153000	24752000	25848000	35337000	34137000	56366000	35238000	15126000				7	7	7	14.7	14.7	14.7	75.042	0	107.38
0	0	0	0	3847300	0	0	0	0	0	2450300	0	0	0	0	0	0	0	0	0	0	0	0	0	0	0	0	0	0	0	0	0	0	0	0	0	0	0	+			6	1	1	20.8	2.6	2.6	49.129	1	-2
0	8862700	7886600	0	0	2581100	0	9561200	0	0	0	0	3170000	0	0	5860900	0	0	0	0	0	0	0	8102900	0	7295900	5684300	6500000	0	14167000	0	8012400	0	0	0	0	0	908280				2	2	2	7	7	7	36.071	0.0063208	1.9072
165350000	134300000	267160000	123390000	156170000	105210000	163570000	194470000	158440000	256900000	355030000	215180000	89835000	164550000	185320000	166930000	150710000	180990000	107590000	134760000	160170000	169510000	164330000	239580000	290310000	337290000	330480000	270930000	292890000	184630000	310240000	192640000	226590000	206020000	138650000	115680000	135770000	91708000				4	4	4	20.3	20.3	20.3	27.041	0	10.262
34196000	20441000	11900000	19301000	22281000	19644000	8614100	13919000	7018700	9717900	14095000	21417000	16165000	29086000	19468000	15113000	18708000	23986000	13277000	10298000	15664000	18291000	14872000	13973000	0	28553000	11202000	20207000	17990000	11717000	18419000	22879000	13564000	22698000	14446000	19994000	19121000	13060000				7	7	7	13.9	13.9	13.9	117.91	0	32.021
4986500	9854900	0	6144000	9567600	5984500	4184200	10124000	10035000	0	0	7020000	6008600	0	6757400	0	0	0	0	0	5329500	0	5520000	14531000	3408700	6213200	0	5171200	0	5909400	0	8597100	1610900	2318100	0	0	5116600	3222000				1	1	1	8.9	8.9	8.9	17.789	0.0053778	2.0338
0	15746000	13214000	5363700	0	0	0	0	13853000	11581000	9575300	9936000	1396100	0	11298000	6699500	6268500	0	0	0	0	0	0	10224000	0	9625800	9505400	10488000	9750200	13695000	29792000	15741000	10675000	6796100	18814000	0	19167000	0				2	2	2	6.4	6.4	6.4	37.636	0.00032884	3.6781
68689000	58226000	32176000	48434000	59941000	35864000	55116000	38844000	52246000	47827000	39125000	57366000	24503000	57445000	20553000	20888000	48060000	39521000	26875000	29610000	52480000	77066000	56592000	26201000	32318000	24719000	30752000	22590000	31079000	46601000	34850000	24115000	41591000	39017000	37040000	51247000	46109000	43093000				8	8	8	20.9	20.9	20.9	72.453	0	14.319
12536000	23256000	16100000	1219900	32347000	19958000	12287000	15986000	29053000	19936000	3184000	22084000	20469000	8313200	12230000	0	21061000	0	11242000	0	0	21841000	0	15862000	12982000	27306000	36182000	29296000	19136000	16168000	14650000	24316000	31671000	14099000	11674000	11901000	10352000	16218000				3	3	3	8.3	8.3	8.3	67.764	0	8.5794
43278000	121640000	55275000	130560000	225650000	97223000	93293000	126000000	88156000	43967000	64701000	188270000	94992000	252130000	94451000	303050000	120940000	63763000	84659000	216980000	77821000	83890000	136860000	73630000	64810000	88968000	70651000	65055000	69840000	73538000	74939000	88920000	77318000	80400000	67778000	125530000	86100000	83839000				10	10	10	15.8	15.8	15.8	104.64	0	323.31
35889000	0	41831000	39810000	42849000	25310000	61125000	26667000	24936000	41951000	30954000	0	31813000	42523000	36863000	35482000	41554000	0	47933000	30657000	95247000	47634000	52238000	39768000	29775000	48719000	63772000	31950000	45284000	43985000	55434000	44496000	47206000	15615000	74271000	0	43181000	99227000				1	1	1	12.6	12.6	12.6	20.332	0	207.07
9760500	5747100	4541400	0	9352100	0	923990	4390000	7489100	0	0	2253300	9681800	5773900	2739900	0	4695700	0	7806400	2682200	0	3647200	0	0	0	10392000	3819900	5032400	3501400	5306300	6912600	10816000	3388000	0	5888700	5124200	5246900	1466000				4	2	2	5.7	2.8	2.8	116.19	0.00062972	3.2639
25198000	0	28964000	0	40608000	0	30976000	0	0	0	82726000	90248000	55793000	0	0	47769000	33846000	0	47790000	0	43007000	0	30127000	0	9769000	0	36748000	0	0	0	0	0	13207000	0	0	0	0	0	+			1	1	1	3.8	3.8	3.8	73.301	1	-2
54676000	165240000	156400000	53934000	38971000	0	52716000	146970000	119990000	111640000	97514000	29488000	19331000	39514000	37923000	41453000	15962000	115140000	73243000	52681000	54838000	70988000	65383000	279760000	55309000	157460000	293570000	99748000	120380000	111210000	140510000	88867000	129500000	55733000	89636000	190640000	103120000	206640000				2	2	2	10.5	10.5	10.5	23.705	0	7.7881
237520000	228440000	291350000	150000000	246040000	205630000	223730000	218660000	278270000	208290000	207770000	195130000	263130000	335580000	169460000	178600000	220680000	172350000	210470000	266250000	193430000	256020000	156530000	122590000	161020000	210300000	185580000	227480000	164000000	170690000	152390000	154260000	291410000	221730000	280210000	204430000	264050000	245750000				14	14	14	50	50	50	47.463	0	323.31
270240000	162910000	147870000	168900000	61524000	193300000	162910000	173870000	127100000	125810000	86179000	138820000	129790000	162520000	93102000	87304000	162650000	151760000	194840000	136150000	122090000	82104000	143940000	86281000	59527000	69072000	59105000	127880000	98575000	85029000	88164000	87226000	117340000	191370000	124050000	83529000	193810000	96374000				10	10	10	32.5	32.5	32.5	52.904	0	323.31
0	0	0	9166800	0	2985800	0	0	5223000	0	0	0	2437100	0	0	0	0	0	13218000	20751000	16926000	13344000	12155000	24484000	22731000	37941000	0	134840000	32005000	0	0	38179000	0	0	0	0	0	0				1	1	1	10.2	10.2	10.2	13.053	0.006083	1.9362
40590000	44190000	33969000	19437000	6423800	21801000	20763000	26089000	25075000	41495000	22494000	14372000	39850000	64589000	23313000	39560000	34976000	37045000	17985000	19839000	23418000	22849000	24990000	21327000	31072000	41902000	54911000	23329000	38179000	47019000	39025000	43571000	29394000	40167000	32787000	34101000	34167000	25010000				11	11	11	19.4	19.4	19.4	120.5	0	102.56
3883200	0	4440100	2550800	0	0	0	0	0	2586400	0	0	0	0	0	0	3838400	0	9417800	6189000	0	0	0	3996400	0	0	0	0	0	0	0	0	3922500	0	2168000	2566100	3176400	0				1	1	1	1.8	1.8	1.8	110.11	0.0053433	2.0085
26382000	10799000	0	12850000	8996700	10347000	8210300	7503600	12438000	7012800	9042700	8428900	9339000	8915800	8317200	5639300	7870300	0	0	9414900	12038000	0	0	8641000	0	7521800	10935000	11312000	8576900	6560800	13396000	7202300	9024900	8367700	7772600	7102300	8408900	6899800				2	2	2	3.3	3.3	3.3	110.66	0.00064	3.4077
20551000	33745000	23626000	16817000	27419000	30713000	24805000	18171000	17728000	17475000	30016000	20010000	19688000	28656000	16381000	43528000	16419000	56076000	30169000	21899000	25305000	36277000	23254000	21041000	25066000	35130000	30178000	27441000	18096000	18399000	45242000	19899000	19765000	25439000	16518000	27315000	21505000	29656000				4	4	4	13.3	13.3	13.3	54.666	0	17.12
229390000	197600000	84677000	603130000	217940000	212890000	196500000	127360000	315170000	194260000	159770000	241710000	195160000	221560000	181960000	140270000	258180000	185320000	158720000	140900000	131990000	158390000	196680000	235730000	140920000	299650000	149460000	138140000	127470000	225700000	178900000	282320000	118700000	106460000	135960000	146660000	93991000	65321000				8	8	8	48.5	48.5	48.5	26.922	0	152.32
94984000	295910000	185590000	197390000	171130000	187380000	116010000	218240000	191870000	190540000	251510000	182220000	123990000	208380000	150260000	128690000	174770000	114090000	221020000	144920000	161640000	139280000	109360000	155690000	126170000	144970000	141050000	113610000	108920000	149480000	121970000	150290000	126300000	203420000	160490000	176320000	168440000	258360000				8	8	8	29.4	29.4	29.4	37.563	0	317.59
8783600	8176600	8786200	15274000	11442000	8971500	0	11156000	10317000	19099000	8731500	9591000	0	17775000	4331100	24808000	24653000	7085400	0	0	0	0	8419000	0	0	0	8423900	7111700	0	0	0	0	6612900	0	6538800	13646000	7462900	12174000				3	3	3	5.4	5.4	5.4	86.307	0.0006483	3.5324
82782000	77835000	140620000	59900000	62593000	83296000	89260000	83380000	52161000	94121000	104060000	168720000	59420000	141180000	77716000	67322000	49334000	164570000	57409000	82175000	61925000	118280000	53666000	54795000	72382000	40627000	63302000	76006000	53091000	63323000	81207000	51423000	94976000	93883000	92749000	70557000	93977000	106560000				5	5	5	13.4	13.4	13.4	51.459	0	123.97
21338000	27056000	25316000	12952000	11943000	23567000	23215000	43059000	25580000	30002000	16204000	0	53783000	28372000	44062000	52059000	39903000	36079000	29875000	23813000	49352000	65099000	54381000	34790000	40514000	47396000	0	26778000	13711000	18364000	54420000	97205000	33956000	19619000	40918000	43022000	33864000	48505000				3	3	3	35.3	35.3	35.3	20.747	0	18.514
6935000	8538700	5834900	6479000	6372800	0	5795000	5043500	5789400	4721200	8655600	2835600	8354100	7944800	0	23684000	0	0	8521700	0	0	20376000	4141100	9819700	5242400	6130500	5408000	17287000	4263900	2658700	4377900	3696900	8904600	6978100	4567300	3752600	6150100	6544100				3	3	3	14.5	14.5	14.5	54.826	0	6.2616
469890000	468850000	465970000	448700000	421240000	321770000	375430000	567640000	495490000	387810000	352530000	639720000	408030000	500920000	481940000	344960000	379740000	272750000	559780000	424180000	470070000	366580000	510890000	340450000	318900000	480800000	297330000	372850000	351700000	352550000	426140000	598400000	346270000	353780000	371610000	497380000	468500000	438750000				28	28	26	45.9	45.9	44.2	123.63	0	323.31
14545000	11927000	15480000	22638000	0	28411000	15546000	13525000	11954000	8356900	17156000	12955000	19312000	22131000	6934600	6590100	12294000	2466900	0	9744000	8603600	10430000	9787300	0	1239600	3689700	1782100	6068300	13214000	3348100	4262500	2426500	9462300	9872800	14069000	7934200	10863000	18342000				1	1	1	10.5	10.5	10.5	17.561	0	29.106
11851000	24266000	15697000	19468000	0	2931000	18433000	16367000	14343000	13115000	18145000	5748800	8047700	9631500	6696500	8230500	15697000	0	6776600	0	13904000	13389000	0	9557200	7159300	12444000	8112300	20716000	11047000	10582000	5886600	7275400	8114500	12564000	10095000	12145000	8711700	11154000	+			2	1	1	4.7	2.4	2.4	63.704	1	-2
308780000	342110000	473330000	238100000	281990000	316160000	374770000	316360000	387760000	423990000	391410000	340120000	338960000	395620000	290360000	456970000	331840000	303360000	341500000	276020000	302630000	267890000	211980000	277670000	353250000	320060000	359770000	412440000	439320000	338300000	403280000	234290000	409610000	401800000	354430000	315760000	399000000	300250000				19	19	19	43.8	43.8	43.8	78.099	0	323.31
107280000	98491000	74304000	33800000	100230000	15724000	93798000	104710000	141220000	78814000	68818000	52911000	65630000	35231000	62625000	74465000	74027000	72381000	0	110490000	45789000	54576000	20483000	67910000	51944000	118940000	54744000	115480000	91261000	98341000	90357000	97791000	171880000	75508000	76625000	57663000	72636000	146180000				4	4	4	15.6	15.6	15.6	39.336	0	17.576
2306300	3252100	0	5086800	0	0	0	2493800	3441500	4588000	0	0	1488800	1060900	0	0	0	1218400	0	0	0	0	0	2408300	1381500	2767500	2950000	0	2418200	2380500	3334200	2258100	2979400	0	0	0	0	1022100				3	3	3	1.8	1.8	1.8	190.68	0.00064205	3.4436
0	1854000	0	0	0	1598400	0	0	0	0	0	0	1596400	0	0	0	0	0	0	0	0	0	0	1651000	0	0	0	0	0	0	0	0	0	0	0	0	3007500	0	+			1	1	1	1.7	1.7	1.7	104.63	1	-2
0	1362500	3169300	0	2260800	3620300	1816200	295060	2449300	698160	2929700	0	802710	0	2538500	8453600	1164000	0	0	1395800	0	1415300	4567400	5047800	2998300	3311300	3472700	0	4007900	5818100	3776100	5765300	6142000	3202300	2614000	0	4928600	0	+			4	2	2	13	7.5	7.5	42.9	1	-2
13274000	26146000	7014300	14059000	8641400	11375000	0	18604000	28330000	4862300	8992700	24055000	0	7261700	8806000	10547000	34356000	0	0	13691000	4539300	750910	14966000	22344000	16829000	22900000	30242000	15090000	17215000	20532000	22999000	17093000	23927000	11169000	11009000	0	5953800	8755100				3	3	3	1.9	1.9	1.9	214.84	0.00064454	3.4675
6167100	12346000	12976000	5039900	0	0	5897100	5600800	19192000	8303200	0	1122100	8378500	5615400	5988300	4185100	14668000	11510000	0	5779300	4601000	0	5874500	7908400	7310700	10606000	9417600	3869600	11030000	5294800	8330100	8509100	10573000	19423000	4510800	4085000	6253300	2118000				3	3	3	7.1	7.1	7.1	84.685	0	30.726
3397900	2643200	1212400	2762700	2605200	3595000	2528500	1723500	1178100	4281900	2629500	5502700	3332800	2620800	2431700	2344000	2516400	0	0	0	1529100	0	1404800	0	0	3530300	1926400	0	0	1608100	0	0	1646300	2486300	1570600	4956800	890000	1227700				2	2	2	14.7	14.7	14.7	33.598	0.00033289	3.8704
7468800	6512000	6624400	0	8462000	3012300	6894100	6431000	7519800	9011300	1553100	7094900	9017100	6261100	3537600	7510300	10402000	0	3331200	9442900	2507000	6978600	7182600	13423000	6176400	11106000	10280000	13523000	6245200	7557700	7876000	6117100	6614400	0	6102100	2885000	5734200	14632000				4	4	4	10.6	10.6	10.6	81.852	0	15.807
413700000	294680000	231590000	317200000	345790000	494960000	282180000	258290000	172040000	510340000	525650000	2408700000	307240000	816670000	276560000	341000000	302850000	449380000	398170000	491260000	260610000	399480000	195630000	382540000	597880000	349750000	537230000	565730000	588800000	491800000	704120000	336820000	653450000	527200000	560190000	345110000	392950000	237560000				1	1	1	14.8	14.8	14.8	9.3697	0	11.263
176800000	150230000	94202000	171990000	180220000	201920000	175560000	124050000	90716000	148130000	154380000	292230000	165430000	162990000	183040000	162720000	92209000	0	67217000	90459000	145620000	54171000	136490000	153040000	175510000	216340000	218910000	131060000	90845000	153540000	164060000	97943000	157180000	126990000	130130000	266870000	135600000	140810000				6	6	6	44.8	44.8	44.8	34.577	0	184.32
121320000	134890000	110550000	83462000	140410000	165110000	160360000	117360000	86377000	94820000	108320000	92391000	88832000	208380000	95093000	149000000	167260000	31116000	65521000	122070000	98414000	227290000	110620000	68886000	84841000	82928000	59861000	63851000	67046000	64099000	103800000	71603000	77828000	103190000	91410000	104980000	161150000	125330000				8	8	8	32.3	32.3	32.3	45.563	0	65.12
52524000	64199000	76746000	123470000	46461000	52495000	54695000	71577000	55779000	47566000	46935000	58079000	43506000	84562000	69245000	44185000	65224000	135850000	27925000	25984000	55619000	32599000	47827000	48943000	36140000	37366000	45553000	36605000	58707000	30895000	30136000	28325000	50917000	67407000	57589000	33409000	36703000	32091000				9	8	8	27.3	24.6	24.6	57.81	0	316.82
76929000	76796000	79318000	76089000	59527000	71467000	83684000	104430000	54326000	70414000	95435000	76569000	86906000	90357000	93661000	102430000	131060000	57032000	135720000	74993000	75381000	160210000	98805000	72443000	87535000	98144000	50482000	89604000	64247000	82144000	87166000	108180000	62988000	65472000	73596000	95886000	91577000	129120000				5	5	5	5.5	5.5	5.5	135.07	0	20.907
11850000	5586400	3815500	4381600	4149900	2764200	0	0	8618600	5820500	4132000	0	4143000	0	0	0	13989000	0	0	0	3658200	0	0	7126500	4507100	8651800	4958200	8488400	7852600	9250300	0	7287400	4776100	2527200	3886500	2602600	3910200	1457300				2	2	2	9.9	9.9	9.9	31.761	0	16.955
54834000	121540000	104520000	84278000	97940000	80234000	66713000	76401000	74029000	127990000	102130000	50225000	59111000	93330000	44399000	54960000	75926000	129510000	44588000	104420000	56543000	60114000	38457000	135970000	105980000	151190000	169050000	92229000	119290000	89433000	117920000	117680000	127420000	69868000	88710000	69671000	121070000	157080000				10	10	10	13.4	13.4	13.4	134.77	0	164.11
154160000	144800000	116890000	106110000	61835000	125970000	91333000	132560000	155900000	96859000	131270000	58510000	119600000	222160000	105290000	113970000	98758000	97800000	132490000	112850000	102930000	132670000	73621000	84200000	128970000	94424000	83185000	84158000	117150000	141670000	103930000	100810000	147500000	133050000	102980000	110140000	182750000	204050000				9	9	9	21.5	21.5	21.5	66.049	0	63.696
270320000	337290000	309000000	229900000	216840000	226040000	229000000	264060000	279910000	281390000	288160000	311840000	243490000	260090000	301640000	264990000	180650000	465160000	201270000	223110000	222680000	196680000	265310000	234590000	269670000	231250000	274460000	239790000	291020000	251180000	265780000	264990000	273230000	356040000	254690000	318760000	274930000	381320000				13	12	4	34.4	32.8	12.4	73.243	0	323.31
14672000	32009000	59831000	24039000	31341000	914920	3575300	23953000	38392000	26552000	4340100	8453100	10658000	0	24295000	16930000	17354000	0	36878000	10131000	15316000	0	33337000	16587000	10197000	13090000	15399000	12544000	12033000	5854600	13931000	459110000	20303000	45330000	12705000	30799000	28258000	72585000				2	2	1	7.1	7.1	2.8	35.078	0.00033058	3.7547
89790000	140260000	112190000	82881000	107060000	115280000	128000000	109600000	96427000	133310000	121430000	141850000	119510000	100240000	145780000	34568000	136610000	92275000	162610000	91551000	177530000	106360000	137780000	115790000	81600000	91458000	70104000	72566000	77751000	90124000	82821000	78746000	74739000	89486000	120870000	119560000	70024000	172210000				10	10	9	44.3	44.3	41.7	57.886	0	323.31
15024000	0	0	7508900	0	15351000	0	0	23196000	0	0	0	0	0	8568300	0	0	0	0	0	43074000	0	0	10653000	0	45632000	16723000	16909000	6107900	0	0	0	14465000	10359000	8925000	0	10798000	13344000	+			2	2	2	10.7	10.7	10.7	47.441	1	-2
82138000	68696000	52431000	113580000	145970000	63568000	102560000	73269000	78210000	72338000	94219000	87991000	92088000	92409000	60390000	96817000	116660000	72362000	99571000	56075000	80229000	120280000	111400000	51599000	60192000	70347000	53433000	55523000	84351000	56402000	52791000	78724000	60971000	61610000	80475000	90837000	59076000	54436000				7	7	7	40.7	40.7	40.7	35.144	0	249.8
62062000	0	29452000	54229000	28877000	0	27583000	38533000	0	26784000	44379000	87442000	32865000	23293000	32308000	34253000	19511000	0	32787000	35196000	59848000	31665000	0	34660000	57659000	37242000	33105000	30765000	43809000	38669000	31632000	46572000	37083000	3101900	28906000	48842000	28546000	11330000				2	1	1	13.4	4.2	4.2	26.827	0.0015211	2.9243
15083000	18691000	464620	339800000	95624000	13098000	2242900	200950000	126910000	427850	3023500	26825000	313150000	6257800	1077500	851000	808240	0	1013200	798800	46027000	377100	749760000	12121000	2771200	14542000	1286600	18010000	4168500	7261600	3444100	620140000	2514200	0	6577100	8059700	1327300	2913600				9	9	9	19.9	19.9	19.9	104.62	0	112
15507000000	14245000000	13810000000	11682000000	14476000000	13128000000	11070000000	13918000000	11466000000	12393000000	19250000000	13364000000	11368000000	14929000000	18436000000	18374000000	13839000000	20079000000	20463000000	19617000000	15210000000	16965000000	16094000000	18951000000	21366000000	15284000000	22606000000	17743000000	15056000000	14045000000	15902000000	16927000000	13582000000	11673000000	15063000000	17510000000	16326000000	17842000000				29	29	2	48.8	48.8	5.3	84.774	0	323.31
17874000	15694000	22672000	8474800	7370900	10463000	10390000	5379500	10669000	12655000	9849600	19512000	4286800	9953700	0	9683900	1132600	15122000	0	0	0	0	9499900	2152500	12455000	23277000	20616000	23177000	23936000	23298000	22169000	20853000	43380000	6552100	11929000	8635100	6558900	0				2	2	2	16.5	16.5	16.5	14.749	0.00034423	4.321
37747000	33037000	15589000	77010000	38109000	43116000	37697000	60004000	47870000	19251000	36176000	74991000	53308000	53117000	46737000	40685000	80509000	68136000	33995000	23838000	24150000	44392000	42677000	24689000	23906000	26905000	12808000	17509000	15236000	22504000	16829000	16300000	24879000	29766000	22299000	43285000	24583000	18084000				8	8	8	17.9	17.9	17.9	99.059	0	31.063
0	0	0	10627000	0	0	0	0	0	0	0	0	0	0	4649300	0	0	3139200	1882000	0	3172600	2766000	21854000	6561600	8666900	5700100	4977800	5179900	5020400	5752800	3815500	13927000	0	0	0	0	0	0				1	1	1	5.2	5.2	5.2	37.943	0.003083	2.2809
5951400	8751600	0	17334000	8081800	6826800	0	10945000	6415800	7751600	15540000	12107000	18843000	5190900	8735900	0	7291300	0	2361500	0	0	1502500	6901900	12493000	0	10513000	0	2592800	0	4089600	0	5159000	0	0	4004800	9063500	0	1243100				3	3	2	8.5	8.5	6.6	74.461	0	10.539
4357000	0	9148700	0	0	0	0	6808400	8226000	6008600	0	5445500	0	8907500	0	12352000	0	0	0	6443100	0	0	0	5256200	7257900	9075300	5034100	0	5399000	4616300	7700800	6879000	8221100	21919000	6124800	5085000	8289700	6788400				4	3	3	11.6	9.4	9.4	46.224	0.0023592	2.6629
18010000	19439000	9373000	39397000	9004200	5399400	6548100	6978600	5090400	11113000	0	4710300	6901700	7204000	3383200	1324800	14139000	0	0	14435000	6560100	0	6477000	0	5770800	6188400	5853800	6796500	6294600	7363400	3350000	0	4505400	14199000	3091500	10161000	5446400	7652600				1	1	1	7	7	7	32.156	0	56.182
14600000	11195000	3767100	1415200	13483000	0	0	5825800	8057600	10698000	69181000	0	26788000	9009000	5191500	0	14843000	2280300	5634200	9705600	5937600	2430900	4400100	1995000	1925600	1483800	1197700	2442800	2043800	13358000	1784900	2058500	9754500	6618600	11206000	6057100	9570000	10084000				4	4	3	4.3	4.3	3.4	218.33	0	13.656
0	0	0	1607400	0	1399500	683340	1195600	933260	1231200	0	0	2970400	0	0	720280	0	0	1111700	1250700	0	0	1380300	0	0	0	0	0	0	0	0	458570	470220	0	0	1420200	0	0				1	1	1	14.9	14.9	14.9	9.6008	0	12.129
0	4110700	0	3730200	1732900	2459400	0	0	2286100	890430	1388500	0	0	3096800	0	0	0	0	993830	0	0	0	0	1592600	0	1625700	1556500	3760500	2171600	2430200	3417200	1421500	6816000	3412200	819320	1247300	2253400	3174700				1	1	1	1.4	1.4	1.4	76.18	0.0028353	2.3885
0	8013700	0	4778300	0	0	0	4310400	3064300	3593600	0	0	0	0	12500000	0	0	0	0	0	0	7578900	0	0	0	0	0	0	0	3829800	0	0	3790300	0	4142800	9802200	0	6943600				1	1	1	1.5	1.5	1.5	135.08	0.00035474	4.8262
70272000	34918000	56546000	60622000	67484000	79841000	51999000	62327000	66602000	81925000	71989000	65287000	14726000	87060000	81955000	84791000	78866000	161370000	84312000	88030000	84431000	59590000	5461200	61689000	131310000	73276000	72532000	66506000	42985000	52170000	59757000	66590000	13255000	119550000	56954000	38628000	64417000	135430000				4	4	4	8.7	8.7	8.7	61.877	0	319.78
56260000	22173000	37801000	64069000	31386000	28524000	29869000	14499000	30529000	27353000	36394000	51335000	47105000	55253000	20395000	24914000	23812000	0	23799000	31168000	0	0	16940000	29662000	30127000	20915000	24243000	25491000	16285000	22249000	24119000	43206000	30040000	23023000	26373000	21847000	31968000	35351000				2	2	2	10.8	10.8	10.8	44.501	0.0030838	2.2823
9859900	50735000	14237000	40929000	26492000	30207000	26332000	14194000	5591400	33077000	14809000	54503000	56712000	16181000	30429000	22521000	18005000	0	19551000	116040000	12945000	12556000	57374000	51268000	65688000	35412000	19281000	31062000	56985000	32274000	37377000	41612000	14770000	33587000	11876000	40513000	12088000	17704000				2	2	2	16.2	16.2	16.2	17.135	0.0003391	4.0794
92195000	44680000	75439000	40586000	23369000	23543000	118670000	45776000	64207000	93314000	111860000	14095000	57238000	76862000	57230000	53259000	77534000	145300000	37328000	73524000	83049000	98321000	39772000	149270000	52237000	69941000	261410000	127460000	77833000	89396000	99202000	67953000	54636000	56434000	87579000	0	83713000	78310000				2	2	2	9.6	9.6	9.6	17.417	0.00035486	4.8266
6557400	19637000	16513000	11626000	14409000	2137400	9558600	15319000	66038000	9282000	32335000	0	14833000	9278200	9075900	13140000	2464400	0	0	10683000	12465000	11089000	17995000	9985500	7064300	11706000	23037000	14373000	10785000	11301000	12395000	10282000	10417000	24033000	12592000	9491800	29081000	12558000				3	3	3	12.9	12.9	12.9	33.382	0	76.623
41674000	45881000	33966000	19095000	38380000	79978000	52397000	48245000	18683000	40180000	24892000	13902000	70922000	33791000	30812000	51170000	17326000	32107000	34400000	12732000	16652000	47511000	16399000	30588000	50402000	41637000	26104000	36334000	49420000	27167000	51845000	24646000	39133000	33891000	34581000	23626000	31033000	23738000				8	8	8	26.8	26.8	26.8	70.789	0	130.68
39644000	21655000	3535200	34377000	0	0	8936000	11910000	24642000	0	40067000	54637000	20218000	39146000	25700000	18140000	16539000	35143000	42064000	72959000	21979000	32992000	45722000	17825000	24252000	23396000	28997000	28575000	18189000	21548000	26426000	37461000	21147000	11567000	26248000	38097000	21140000	42846000				3	3	3	20.6	20.6	20.6	28.796	0	98.402
142990000	228920000	137350000	146120000	131760000	142720000	110800000	131360000	164960000	166870000	153300000	139140000	107220000	138100000	133120000	189590000	113000000	236610000	122100000	146030000	134620000	84385000	123920000	151110000	179390000	177850000	176530000	181500000	107730000	163030000	161230000	119990000	126560000	93049000	124640000	90856000	138020000	190050000				12	12	12	14.7	14.7	14.7	130.16	0	36.165
11750000	0	6083300	0	0	0	2418900	35688000	0	0	13309000	10501000	0	0	0	5377500	4895200	0	0	0	0	0	0	6522600	4441400	7977600	9574400	87915000	5075500	5248400	6696500	0	16501000	0	8490100	0	11079000	0				3	3	3	5.2	5.2	5.2	81.12	0.003103	2.3472
0	0	0	1382600	0	0	1185700	0	0	0	1035400	8779300	0	0	0	1366400	0	0	0	0	0	0	0	0	0	0	0	793560	1073900	0	0	0	1261000	1854700	1002500	0	0	0				1	1	1	7.5	7.5	7.5	24.775	0.0030353	2.1854
0	6717500	1261000	7321900	0	7037200	0	3739800	0	4563900	0	14846000	0	0	0	1213700	0	0	0	0	0	0	2522800	5154600	5336600	7876100	3850900	3987300	5547400	5110100	4719000	3829900	4274000	4412800	0	2282300	0	1009400				2	2	2	7.5	7.5	7.5	37.808	0.0015347	2.9946
0	1792700	6482200	11964000	0	15655000	7095900	8457700	4073900	4389100	12408000	6385900	0	11047000	2807400	0	12271000	0	3762100	15373000	10805000	7469700	1632200	5412800	5074300	7392400	10415000	6567600	8027200	4401200	7519400	3352700	4638900	5477100	3799200	5519200	4448100	2331700				2	2	2	12.1	12.1	12.1	31.073	0	42.596
0	0	0	0	0	0	6564500	0	0	0	4318200	4181500	3719300	7964400	0	5324100	0	0	4563400	4492700	4544700	7822800	3122900	4133600	5580300	5616600	0	5322400	5848400	5615100	0	7898300	0	0	0	0	0	0				3	3	3	9.4	9.4	9.4	84.382	0.00033367	3.9019
0	7933700	7865300	5148500	5563000	3929400	5499900	3350100	27729000	0	9428600	0	0	10505000	5580100	0	12475000	0	5346900	13588000	8405800	21543000	4837100	8678100	9730500	17742000	10040000	14228000	9591500	8421400	16169000	17109000	2975500	5286900	2407600	8860200	3341000	11996000				2	2	2	7.4	7.4	7.4	47.484	0	23.759
94724000	164490000	68465000	49993000	107580000	58882000	63290000	55090000	195950000	101250000	199100000	43520000	62534000	74095000	63770000	68328000	105370000	80766000	25866000	81243000	62730000	71873000	86986000	148760000	87743000	85823000	111770000	80580000	76340000	76057000	86850000	96642000	118850000	73255000	80896000	88564000	105040000	101270000				3	3	3	20.8	20.8	20.8	18.624	0	41.901
16091000	16863000	10549000	23027000	33613000	10666000	884100	27160000	16766000	8271000	20262000	19215000	10373000	9188600	18822000	18899000	32567000	20548000	339760	0	32087000	25624000	14575000	41117000	13694000	22732000	19671000	45700000	33688000	25441000	23604000	24291000	25766000	12404000	30039000	15646000	20800000	10139000				2	2	2	19.2	19.2	19.2	14.285	0	87.915
125130000	133550000	89014000	146480000	187970000	151190000	139450000	106910000	137040000	156040000	149600000	182970000	190150000	150910000	140350000	148280000	123750000	149650000	175450000	119890000	170900000	126120000	191450000	137460000	148990000	142350000	128350000	110120000	188010000	98672000	150260000	152310000	148020000	124120000	117140000	141210000	136150000	114020000				11	11	11	34.7	34.7	34.7	72.683	0	165.77
3073800	0	0	0	0	0	0	967680	1989300	0	0	0	0	0	0	0	0	0	0	0	0	0	0	0	0	0	0	0	0	0	0	0	1557400	0	0	0	0	1284300				1	1	1	6.6	6.6	6.6	34.463	0.0017948	2.7731
66421000	50576000	71174000	49467000	72071000	157010000	126850000	47765000	39643000	100630000	93206000	141030000	130530000	114860000	126270000	128270000	34820000	371820000	113450000	109300000	96175000	132980000	59882000	107550000	156310000	140660000	106400000	80703000	108610000	52843000	109140000	49439000	74576000	146600000	92365000	142420000	105620000	92421000				6	6	6	20.8	20.8	20.8	43.566	0	221.2
74271000	47913000	56344000	45486000	31355000	41052000	46007000	30890000	39959000	36383000	74360000	6358400	41664000	71031000	54533000	28833000	32021000	32055000	0	20491000	34918000	14304000	36451000	49751000	52407000	33192000	25118000	39132000	29706000	44853000	33496000	60547000	36886000	43910000	18286000	34052000	49663000	25803000				5	5	5	5.9	5.9	5.9	121.69	0	18.062
47618000	38590000	50984000	49579000	56127000	67461000	49182000	68223000	34791000	30624000	33177000	46645000	57780000	70702000	41005000	37051000	44025000	47915000	43392000	22180000	42559000	54638000	35819000	31616000	39731000	26471000	36794000	29100000	32400000	30629000	42561000	35780000	20592000	44307000	32833000	50062000	31776000	34484000				15	11	11	35.4	27.8	27.8	100.41	0	39.259
27176000	14272000	24469000	0	12162000	14506000	34240000	16771000	19513000	20756000	17790000	13509000	18120000	12918000	19821000	20238000	12742000	14914000	19537000	12067000	18033000	12419000	21972000	16623000	21225000	20577000	14397000	18201000	15231000	17948000	27992000	16847000	30719000	20783000	17678000	15136000	25172000	27212000				4	4	4	31.7	31.7	31.7	23.846	0	9.2782
334890000	250760000	164190000	122280000	280600000	257070000	185740000	229400000	354350000	340960000	269870000	332760000	331810000	347910000	219790000	171760000	293940000	194260000	280980000	234300000	220220000	393760000	131880000	318560000	218750000	266280000	246280000	244010000	241970000	280880000	266020000	179920000	248830000	196780000	295010000	169660000	299690000	243660000				5	5	5	33.9	33.9	33.9	27.887	0	193.81
22118000	18668000	19172000	25655000	11845000	0	6190600	22121000	23856000	30598000	79885000	0	20634000	24206000	16625000	24311000	22666000	51651000	26469000	30771000	23063000	32691000	29373000	19370000	19783000	37478000	29598000	17745000	14692000	17346000	37105000	30225000	15486000	18271000	19987000	54998000	18399000	32144000				2	2	2	11.2	11.2	11.2	35.201	0	5.7536
0	10156000	5599100	3773900	0	4369400	8444900	6123100	0	9547400	0	0	0	4949300	0	13694000	10098000	0	0	0	0	0	0	13246000	10340000	14625000	16455000	6936000	8127400	10562000	11772000	0	0	3713200	6836500	0	6663500	0				1	1	1	2.1	2.1	2.1	86.517	0.0017857	2.7213
16713000	9615100	15389000	0	18331000	17014000	10949000	21178000	16951000	13135000	16372000	11205000	15788000	14959000	12265000	6734600	13666000	12654000	12254000	15902000	13612000	11863000	11386000	18033000	10394000	15045000	19651000	12117000	10597000	18641000	28541000	18213000	19684000	5652600	17128000	7972700	35438000	20005000				6	6	6	8	8	8	137.46	0	12.088
4158100	0	3304400	2542800	0	0	0	1565100	0	2290200	0	0	0	0	4380900	0	0	0	0	0	0	0	0	0	0	0	0	0	0	2263400	0	0	3858300	7108300	0	0	9359200	0	+			2	2	2	11.3	11.3	11.3	37.767	1	-2
191750000	101480000	118850000	102240000	135520000	190190000	87605000	204100000	120780000	136630000	240710000	117480000	161830000	192740000	148950000	133660000	159130000	205580000	233650000	466710000	299420000	143530000	148060000	117830000	210620000	121820000	121080000	87148000	107620000	158930000	197100000	205130000	134010000	53333000	92753000	176180000	0	182890000				1	1	1	9.2	9.2	9.2	16.516	0	23.5
50105000	0	12720000	0	44629000	18975000	20646000	0	50600000	21090000	29706000	10776000	13505000	33903000	17298000	12950000	21908000	0	20118000	0	0	0	24819000	19087000	9219300	30858000	74289000	13321000	12867000	17353000	12732000	31885000	7027600	0	27737000	26420000	16337000	0				1	1	1	13.7	13.7	13.7	13.735	0	5.9181
42875000	19874000	23176000	11347000	30253000	29703000	13688000	13958000	12508000	21625000	0	44969000	13248000	15676000	22500000	22305000	49330000	33439000	15371000	39174000	9701000	26485000	34799000	27614000	17752000	23819000	18535000	17848000	20536000	20909000	18628000	23619000	16841000	19649000	18033000	18647000	24310000	23245000				3	2	2	20.8	15.7	15.7	26.071	0	38.962
0	0	58342000	150420000	58778000	18416000	44937000	56690000	0	57563000	95004000	37053000	34708000	23221000	46238000	38346000	30140000	0	0	0	0	0	0	13284000	58394000	50081000	53577000	42949000	37276000	55390000	54744000	69156000	45395000	29605000	75678000	0	0	0				2	2	2	10.3	10.3	10.3	25.996	0	11.861
0	3313600	0	5072600	0	0	0	2806700	0	2677100	2585100	0	0	0	0	0	2087900	0	0	0	0	1853600	0	0	0	0	0	0	0	0	0	0	0	0	0	4480200	0	0				1	1	1	6.2	6.2	6.2	29.235	0	130.35
15601000	7705000	15516000	5350900	7551700	7177000	0	6183100	0	16474000	6605400	5901300	9957000	4656700	6255500	7558700	8772400	8699000	8309300	5544800	5998600	5026700	6595900	5923900	5283500	4915100	7365300	0	6641500	6387800	8384600	4398800	9451900	7458400	5418700	0	13290000	10379000				1	1	1	8.1	8.1	8.1	21.943	0.0023557	2.6462
56803000	132760000	125160000	47717000	78197000	51634000	69991000	80762000	47726000	120930000	44228000	41279000	42781000	45862000	89936000	133640000	37145000	62845000	22053000	0	74347000	83866000	0	82081000	92399000	97997000	110920000	104240000	78941000	94159000	106390000	54165000	74501000	35489000	102830000	61139000	139510000	104510000				3	3	3	6.3	6.3	6.3	55.056	0	12.791
27123000	11684000	17819000	0	18903000	0	11973000	0	19842000	26389000	29534000	19625000	23649000	8205600	25034000	11571000	9449100	0	17214000	5299600	19849000	0	22489000	26642000	30323000	20043000	19909000	13595000	0	17714000	22825000	25346000	4864400	29097000	31333000	19942000	43943000	29054000				3	3	3	18	18	18	39.786	0	42.667
62054000	60889000	48664000	64570000	61611000	53128000	44949000	67783000	39307000	89467000	48701000	28335000	54192000	50711000	71868000	73692000	47756000	35624000	76206000	84707000	18379000	54150000	55075000	65677000	70681000	66966000	32531000	48957000	53742000	54159000	92324000	72016000	63373000	66722000	126800000	29047000	68340000	63084000				13	13	13	27.6	27.6	27.6	102.16	0	56.775
281970000	97091000	151280000	249600000	161850000	155210000	153180000	230960000	186940000	108300000	164760000	400620000	330040000	158750000	160380000	230150000	257490000	119110000	102400000	90706000	190160000	204750000	158870000	144390000	117130000	231430000	174660000	190570000	221590000	212000000	277580000	201190000	103710000	305210000	208160000	99718000	200950000	130810000				6	6	1	62.2	62.2	17.4	19.779	0	323.31
11939000	4753700	12997000	20842000	7028700	4134800	8216100	15687000	0	8913900	0	0	0	0	0	0	0	2354300	0	0	0	9596900	22867000	8650100	10781000	7842200	7251200	16548000	14131000	5951300	7499400	4262500	12178000	13202000	6196700	0	5145400	12109000				1	1	1	21.4	21.4	21.4	6.5696	0.0035695	2.1612
20425000	18794000	22338000	11433000	29893000	16463000	39962000	4667400	8066300	20265000	8413100	26031000	10230000	0	10766000	16164000	29032000	22362000	27969000	12060000	20027000	24566000	12728000	14613000	12911000	0	9920900	7340800	0	16856000	0	16027000	33883000	21735000	41989000	15375000	22992000	0				5	5	5	14.3	14.3	14.3	76.375	0	21.502
4636100	0	0	7606600	3486400	0	5764800	0	5136400	0	0	9029700	0	5503900	4570700	0	5870000	0	0	0	3957500	13044000	0	8789100	3956300	0	6105500	8563400	0	9193200	11278000	11384000	0	10102000	0	0	8350400	8918900				1	1	1	6.3	6.3	6.3	29.884	0	7.6023
27734000	34269000	19524000	19926000	62288000	33993000	37030000	16851000	17422000	19391000	19702000	33149000	37303000	23177000	22611000	27386000	30012000	0	0	74022000	45084000	0	29732000	34688000	35013000	31040000	31364000	30477000	12244000	19646000	27330000	20326000	16221000	21225000	16203000	25966000	32111000	27181000				4	4	4	6.9	6.9	6.9	105.64	0	265.86
15536000	7053600	7070600	0	0	0	0	0	15058000	0	13814000	0	0	0	0	9986300	6255300	0	0	4629300	8891100	2015900	0	0	0	0	0	0	0	0	0	0	9882200	12952000	0	8609700	8008800	0	+			9	1	1	22.1	3.6	3.6	46.437	1	-2
942790000	1039700000	878620000	695260000	1068700000	877690000	927580000	773570000	773090000	768770000	622410000	834430000	691140000	952470000	621510000	664460000	757310000	616000000	470130000	551060000	952900000	612510000	732460000	435000000	651130000	694940000	700400000	603520000	615080000	651040000	782880000	745410000	682430000	646620000	653540000	774600000	824980000	648530000				9	9	1	39.3	39.3	7.4	27.191	0	323.31
608570000	590770000	530960000	462760000	540750000	532870000	451580000	567610000	594220000	492720000	414000000	599810000	505640000	724890000	435400000	454750000	457750000	610480000	517780000	476170000	593080000	407260000	451210000	444650000	429450000	436410000	388140000	515860000	474530000	460990000	480340000	400300000	474460000	505930000	419290000	479970000	494140000	564710000				29	29	29	42.6	42.6	42.6	123.38	0	323.31
14728000	9394400	12109000	8220900	17329000	11677000	9931300	8952700	12368000	11226000	10140000	11673000	10244000	16679000	12385000	11869000	18675000	0	19934000	21828000	11495000	22719000	5185000	19635000	15538000	19437000	17834000	24032000	20585000	15003000	24425000	27897000	10900000	20932000	15905000	22833000	36270000	29201000				15	9	9	9.3	6.9	6.9	268.31	0	19.751
0	6300400	0	2553900	4280500	0	1608700	0	3856000	3495700	14028000	7828700	4218700	0	0	4160000	3034600	0	0	0	5163700	10153000	0	0	0	0	0	0	0	3620700	0	0	5763800	4421000	3003700	3801700	3087500	0				2	2	2	1.3	1.3	1.3	228.87	0.0031082	2.3568
27377000	24622000	13819000	30268000	26110000	23657000	23263000	14296000	18120000	17942000	0	30348000	27701000	28084000	24880000	19138000	32494000	0	29113000	18649000	25583000	22454000	21512000	58194000	13527000	19101000	21444000	14324000	50528000	21913000	23870000	23290000	20045000	14297000	24835000	20688000	18602000	19327000				9	9	9	9	9	9	205.12	0	43.395
30408000	29529000	33664000	28065000	18927000	37093000	23895000	33434000	16990000	39572000	21617000	30882000	43525000	23394000	24776000	28809000	26020000	73191000	20446000	8034200	22919000	27861000	31167000	34336000	30274000	39157000	25579000	32409000	20557000	25092000	19457000	17936000	19137000	44323000	16605000	47251000	17571000	25988000				6	6	6	9.8	9.8	9.8	118.23	0	28.088
8741500	14158000	0	0	2807900	0	0	0	23663000	0	8734600	4098400	7041700	13134000	0	0	0	0	0	0	0	0	0	13072000	0	16336000	0	14325000	4109400	18502000	0	11503000	0	0	8257200	3635700	0	0				3	3	3	10.6	10.6	10.6	39.041	0	9.1409
6122300	4959100	4516600	11558000	30603000	5200700	3976600	0	3571200	4626800	0	8895900	0	4362900	4443700	4286100	10176000	0	0	2688600	0	8357700	8739400	0	0	5472400	7744000	0	8737600	0	0	0	0	4533100	5669900	5375200	5925900	5488400				2	2	2	4.3	4.3	4.3	85.124	0	106.84
9019600	12837000	14400000	0	7736500	0	14181000	10529000	15877000	2618600	31853000	7293400	0	0	0	0	11111000	31156000	8249700	19345000	17341000	0	16633000	10426000	10529000	12208000	0	0	14457000	13482000	13743000	19720000	16855000	0	9225100	15351000	20057000	14907000				2	2	2	1.9	1.9	1.9	161.1	0	10.442
282130000	247390000	177890000	298620000	352890000	195150000	217830000	239990000	258710000	182450000	230510000	309190000	228490000	202780000	239000000	180780000	324820000	57470000	217220000	286820000	184620000	197740000	528870000	140180000	160650000	228660000	210750000	129270000	166600000	143170000	200740000	207090000	131200000	133280000	174870000	154940000	176820000	202040000				14	14	14	37.4	37.4	37.4	82.223	0	243.86
45056000	0	1975100	0	0	0	8581200	5733500	3823100	0	0	9056000	10788000	5174800	10245000	5442900	12305000	0	0	15797000	20403000	7033700	31714000	8947300	8910100	9315300	8121700	5661700	5126900	6578100	7748100	8887600	11818000	4181200	16193000	10708000	0	3301400				1	1	1	6.1	6.1	6.1	36.648	0	96.656
2407700	4048800	0	0	3528300	0	5841000	4355800	0	0	0	0	4460400	0	0	0	0	0	0	0	2174800	0	1676900	0	0	0	0	5466600	0	4358900	0	5415800	5894000	2129100	4468100	0	0	0				6	2	2	19.8	7.6	7.6	60.348	0.00033887	4.0731
15534000	18124000	28469000	15101000	41783000	15073000	0	40612000	36275000	12059000	0	10457000	22141000	0	27035000	0	34338000	0	0	0	12252000	0	0	17411000	11133000	21381000	22733000	8594800	1108100	13540000	10031000	31708000	15785000	3490900	20163000	0	20332000	0				3	2	2	13.4	7.3	7.3	40.949	0.00033223	3.8322
75273000	176680000	96460000	88151000	27885000	19055000	30783000	278470000	97718000	139390000	104540000	77145000	67202000	72503000	33889000	93866000	110890000	85044000	133770000	72529000	73869000	114050000	101200000	104050000	84598000	232700000	105890000	125100000	116730000	129630000	124620000	197790000	75787000	67190000	122560000	254260000	72606000	136120000				5	5	5	34	34	34	34.333	0	258.09
46372000	43718000	35777000	39930000	22177000	33463000	38649000	51006000	62576000	43696000	28709000	38255000	53943000	35587000	23384000	28993000	50820000	38463000	33111000	7911500	21881000	23179000	48925000	32108000	29681000	41457000	21522000	30343000	32040000	29900000	24044000	55647000	24976000	60396000	45848000	43628000	29658000	43106000				2	2	2	13.5	13.5	13.5	20.546	0	49.229
0	9540300	0	0	0	0	0	0	10394000	0	0	0	0	5106800	7434900	0	0	0	0	0	0	7935500	11434000	12032000	0	9831600	14806000	0	0	8926700	14805000	9878600	5502600	0	0	0	0	0				2	2	2	9.1	9.1	9.1	38.646	0.0092497	1.7413
112830000	37555000	80066000	108470000	45428000	27492000	68588000	115770000	135310000	61947000	32449000	41562000	121930000	48635000	57538000	52803000	96016000	47304000	33028000	26646000	56774000	39219000	34917000	72717000	91673000	78835000	100990000	118940000	81757000	84048000	92637000	132950000	98611000	58143000	134430000	126090000	88146000	87558000				3	2	2	13.9	9.9	9.9	23.818	0	29.525
13709000	6148400	17760000	9923500	4486900	0	16096000	14086000	0	16288000	17218000	0	0	26582000	16546000	7898600	12031000	51698000	0	11576000	37269000	0	24493000	0	0	0	0	11053000	8167200	9443800	0	12838000	13360000	11412000	16070000	25887000	13670000	27225000				3	3	3	26.9	26.9	26.9	19.55	0	15.75
20689000	21947000	34675000	53934000	35809000	36946000	42994000	25029000	43205000	42332000	35232000	32392000	14252000	47553000	24202000	54131000	27740000	39552000	29811000	43018000	34919000	30077000	23385000	45674000	51817000	42093000	43511000	54505000	47181000	41401000	56120000	56891000	46005000	38263000	32416000	20644000	29291000	21944000				5	5	5	42.6	42.6	42.6	14.582	0	40.076
18081000	25857000	8383000	6874000	4728800	10253000	3121100	7793900	21641000	6361700	6033400	15880000	4442200	4765900	3303600	6514300	14649000	10716000	16438000	37273000	0	27402000	0	9607700	10329000	12939000	14138000	15384000	11034000	10877000	9253700	0	19664000	14258000	5398700	7900200	12393000	15142000				3	3	3	31.1	31.1	31.1	25.704	0	17.08
5601900	11227000	20728000	17625000	12939000	5116600	4761900	10474000	0	14980000	3170100	3009500	5496300	6693800	0	7690800	8344400	0	0	0	10304000	0	0	0	10070000	7942500	0	0	0	0	3072900	0	5077300	3436100	5632800	18790000	7876400	9062300				4	4	4	9.6	9.6	9.6	67.257	0	5.6372
26731000	0	29586000	7912100	14583000	30537000	10191000	16785000	28248000	8461500	25553000	19129000	22549000	12942000	20929000	19143000	16636000	31030000	34844000	22064000	18046000	10632000	25765000	29740000	38725000	33253000	18073000	17987000	16869000	14141000	16765000	29155000	33417000	27426000	29480000	36808000	30105000	10291000				1	1	1	9.2	9.2	9.2	22.958	0	7.8746
65630000	64128000	52791000	51561000	40081000	35350000	50158000	54598000	42476000	69825000	29006000	70930000	41617000	39245000	42104000	47311000	46368000	32081000	54557000	45987000	43163000	56827000	40816000	30253000	27373000	34738000	25287000	50426000	31399000	26909000	31393000	26428000	50482000	66182000	41516000	58386000	27420000	41924000				5	5	5	41.5	41.5	41.5	17.97	0	212.56
39863000	60027000	43765000	45724000	57113000	61472000	64045000	32252000	39232000	46038000	31313000	37004000	34801000	80850000	39240000	65918000	52502000	67919000	51622000	55062000	28207000	39225000	59273000	50811000	66894000	55168000	58327000	53063000	65088000	58408000	64291000	51947000	70241000	57673000	53603000	62444000	52571000	41629000				11	11	11	18.3	18.3	18.3	115.7	0	69.762
2055000	6802500	5780000	2856500	4776900	11512000	2423500	3697900	7005100	1989600	5848500	0	4216800	3531900	0	12024000	963550	0	5642200	8506200	0	19526000	0	12185000	14792000	6509400	9153400	11437000	13401000	10063000	11519000	8561500	1974900	5752300	801740	4774000	3471800	10109000				4	4	4	9.5	9.5	9.5	95.467	0	323.31
11150000	8395200	36340000	12563000	25690000	0	18014000	11978000	9453100	11358000	0	0	28666000	20248000	14379000	18518000	22641000	0	13035000	0	0	14335000	10318000	13982000	16793000	18561000	18220000	10671000	14160000	15550000	18765000	12830000	7874500	0	8590400	18458000	10620000	8434900				2	2	2	28.6	28.6	28.6	13.428	0.00032658	3.6072
0	0	5734800	1290500	0	0	3782300	0	0	3798500	2979300	0	0	9477900	0	7184800	2662200	0	0	0	6154100	5172400	0	1608000	2435800	1769500	1892300	3398700	1955000	771630	1926700	2282800	1794900	4669700	4115600	0	2540100	4779300				2	2	2	4.4	4.4	4.4	104.74	0.00033344	3.8916
0	0	0	0	4846100	6772700	12084000	0	0	0	0	0	0	0	0	6117300	0	0	0	0	0	0	0	0	0	3728100	0	0	0	0	0	0	0	0	0	0	0	0				1	1	1	2.9	2.9	2.9	62.287	0.0028329	2.3881
28533000	26120000	50978000	35844000	37708000	61220000	53017000	16739000	13749000	20892000	53606000	62501000	37903000	51361000	75931000	62166000	167700000	198580000	70613000	106010000	58979000	74887000	40174000	55517000	67146000	104850000	96625000	49252000	138130000	46837000	143390000	37276000	36863000	53530000	24560000	39416000	49718000	47352000				4	4	4	14.4	14.4	14.4	67.113	0	44.432
16355000	12992000	12210000	6915500	0	11215000	8737000	15925000	8425900	8751100	7244900	13951000	15552000	10881000	11119000	15687000	11784000	19756000	6741800	6167300	0	0	9824300	0	1240600	9774900	9130400	6969700	6630200	5081100	6104000	11023000	19470000	5207400	12956000	10054000	9885000	8846600				3	3	3	10.6	10.6	10.6	59.271	0.00036792	5.5669
5987100	0	5694400	0	3969500	4375700	0	6589700	0	0	0	0	6430500	0	0	3877600	3917100	0	0	0	0	0	4865300	0	0	0	0	0	0	0	0	0	4316800	0	4269800	7926400	3935600	0				3	3	3	4.6	4.6	4.6	138.6	0.0043632	2.1204
42907000	36027000	42560000	3551700	31874000	15717000	29387000	33943000	56593000	27144000	79800000	30473000	43882000	36319000	25490000	25754000	33890000	49854000	22503000	38692000	26416000	11513000	58942000	34797000	27728000	29593000	29983000	30783000	18570000	24295000	40208000	28938000	18093000	16265000	26737000	14372000	31276000	61043000				7	7	7	29.5	29.5	29.5	58.14	0	19.525
11376000	8001100	6303800	5462400	5022600	12854000	12617000	7481700	3703900	8472700	7397700	13429000	11500000	13291000	9103900	7198400	16100000	31318000	10068000	0	8386700	10173000	5786500	5585700	4760600	9781200	7517100	0	0	1812900	16209000	0	8996700	7928100	4715000	11610000	4990300	6027200				4	4	4	24.1	24.1	24.1	39.93	0	13.269
0	4658200	0	0	4619500	6992500	7380900	0	0	0	7440200	0	6071600	0	6239300	3861900	5568100	0	0	6792400	5483600	10265000	0	0	0	0	0	2907000	0	0	0	4865700	3389700	0	6627800	5464700	0	0				3	3	3	16.6	16.6	16.6	48.847	0.00035411	4.8056
60765000	70655000	39102000	21534000	54378000	53511000	47633000	30385000	61842000	83956000	62493000	46869000	62178000	68043000	45148000	67807000	43956000	65422000	57251000	80633000	46540000	52060000	64163000	50535000	61869000	50772000	95749000	45391000	50875000	63478000	68478000	46215000	58628000	43773000	51451000	51895000	57690000	54288000				7	7	7	12.7	12.7	12.7	93.045	0	73.911
0	0	0	612550	0	0	0	0	0	0	0	0	865170	0	878020	0	0	0	0	0	0	0	0	1008400	1815300	766270	647270	0	620530	0	665860	807890	0	0	0	0	0	0				4	3	3	9.4	8.2	8.2	96.035	0.0073012	1.8529
20367000	24219000	28814000	22918000	29616000	18766000	21560000	40389000	19621000	25115000	18320000	59589000	21984000	43715000	24944000	39289000	13090000	19138000	37766000	22009000	17139000	17338000	11523000	19369000	23684000	15915000	21649000	18630000	14208000	18794000	15250000	20385000	32041000	38607000	24360000	31306000	24680000	19251000				3	3	3	22.6	22.6	22.6	27.4	0	18.754
3399500	2882900	4028500	1858900	0	4948700	6250200	4752300	3110600	4157000	3234400	1633700	2708600	4324800	6588300	0	0	6460200	3017900	4584500	3911500	0	0	2948400	2471700	3048400	2362500	10748000	4285200	1992100	2999300	3421500	2134700	0	2440300	4582700	2532600	3269700				3	3	3	3.4	3.4	3.4	144.2	0	6.8444
16770000	16068000	11576000	11202000	0	8646200	11359000	15428000	12802000	16340000	21084000	9438600	0	8156700	11879000	17498000	29046000	0	0	7147700	0	13712000	0	20306000	29161000	27325000	37001000	31111000	13109000	19974000	29526000	42095000	17495000	0	19378000	13696000	10945000	7712200				4	4	4	25.8	25.8	25.8	22.417	0	6.2405
3622000	0	0	31567000	0	0	0	20948000	22838000	0	0	13815000	7856200	11657000	0	0	0	0	11915000	8195800	0	0	10451000	8970800	0	9839200	0	0	0	0	6374100	20490000	7525500	5640300	8701700	10709000	0	0				3	3	3	44.4	44.4	44.4	16.32	0.00035448	4.8179
16885000	6659600	16798000	9209700	8665600	7515700	14345000	9709300	19590000	10188000	6971600	4811400	9267100	9563300	2485500	11952000	0	15960000	25757000	8555700	6650600	7306400	12805000	8966200	8235800	6521400	4734800	14261000	10946000	11699000	0	5159900	10180000	9051600	6086700	14410000	8026600	10640000				4	4	4	47.2	47.2	47.2	16.311	0	85.196
14891000	19286000	0	0	14991000	17393000	18134000	12888000	0	21608000	0	9204600	0	0	16875000	0	19636000	0	10091000	0	19909000	0	0	12291000	18216000	24514000	0	0	0	0	0	18809000	30933000	13951000	0	0	27203000	0	+			11	2	2	27	4.8	4.8	73.153	1	-2
577330000	622780000	718560000	149760000	649050000	592810000	779170000	423600000	505220000	869980000	821450000	622750000	615900000	807040000	607390000	696050000	705270000	849320000	743970000	1043600000	849440000	998250000	384320000	442650000	918300000	578110000	1015800000	901350000	784410000	647110000	735810000	418670000	874590000	649690000	890590000	1396100000	1187500000	731020000				5	5	5	26.3	26.3	26.3	25.592	0	323.31
13734000	25153000	27955000	28165000	45562000	35994000	33790000	15099000	55412000	19114000	27207000	34119000	38156000	59321000	39511000	14120000	58569000	26028000	53973000	19567000	8372300	45141000	15597000	28040000	29704000	54790000	56556000	30606000	43052000	35212000	49338000	61761000	32722000	15189000	28194000	21232000	19464000	6886500				2	2	2	17.4	17.4	17.4	14.889	0	6.6874
845670000	762420000	1357100000	489240000	938730000	1646200000	1742400000	470130000	467830000	2482200000	1678600000	2364500000	747610000	1011900000	1071400000	1344600000	1280300000	1908900000	3818600000	3118300000	806400000	1731100000	300340000	804760000	1113800000	834440000	1232000000	1374800000	909450000	328710000	1291000000	410030000	858420000	1532200000	1061200000	1207300000	1908300000	492820000				3	3	3	17	17	17	39.026	0	323.31
28526000	12679000	26774000	12001000	42094000	58386000	42838000	6529900	14351000	20584000	49605000	30796000	20285000	51501000	28915000	14296000	26693000	34280000	27531000	38120000	31794000	90668000	36124000	17083000	24608000	29026000	46976000	29459000	28397000	22994000	34787000	27248000	15658000	24012000	26020000	11374000	38043000	18530000				7	7	2	18.5	18.5	6.6	96.117	0	68.169
0	4733600	0	6914100	7504500	5278700	0	7265100	14144000	0	0	3415300	0	0	6740100	6817900	0	0	0	0	0	0	0	0	10547000	0	0	10166000	5479000	0	0	27448000	0	0	0	0	0	0				1	1	1	7.1	7.1	7.1	25.641	0.0017836	2.7188
640970000	726970000	851650000	973220000	624760000	859960000	741160000	536560000	443790000	829100000	1252700000	552770000	633390000	611290000	762980000	1044400000	625350000	1376400000	1031700000	839780000	787190000	1201900000	620090000	734270000	979410000	767990000	1702300000	926000000	913850000	981440000	1634500000	1014900000	800370000	693150000	724560000	1007600000	777590000	877240000				5	5	5	26.9	26.9	26.9	36.116	0	308.15
516820000	476580000	535390000	337840000	417930000	273720000	354670000	416550000	484260000	348540000	409240000	327150000	345400000	521840000	354580000	313390000	382620000	450510000	339140000	343430000	327490000	310480000	321890000	344330000	304800000	324140000	454160000	260310000	327120000	350410000	444850000	285220000	335280000	338290000	382450000	390830000	410660000	444850000				20	20	20	42.3	42.3	42.3	90.932	0	273.55
22981000	14170000	15254000	14265000	8967700	25247000	21947000	7608700	10618000	10234000	14161000	24245000	21287000	21959000	22150000	19860000	27308000	0	13689000	17674000	21028000	29425000	0	15930000	14892000	17972000	13742000	11551000	15424000	12193000	15305000	13794000	11889000	16505000	23039000	11454000	22312000	18431000				3	3	3	11.8	11.8	11.8	54.843	0	13.742
15751000	13324000	16198000	12787000	18848000	10011000	12345000	12976000	9530200	12033000	13958000	8518100	17340000	10255000	12309000	14456000	19067000	0	12877000	16966000	7757100	11508000	22064000	11100000	13975000	13249000	16182000	12163000	9786600	9189300	10284000	14667000	13574000	11933000	14328000	13830000	16534000	6144600				3	3	2	4.3	4.3	3.2	106.98	0	12.844
52600000	94571000	120830000	44979000	78803000	272590000	176090000	27918000	24885000	110080000	91250000	105120000	90715000	113550000	225530000	178340000	126780000	241090000	51337000	19272000	69814000	81698000	120450000	138680000	180810000	132120000	130660000	57080000	121040000	113230000	120340000	137610000	126830000	108520000	69803000	119740000	213270000	322450000				1	1	1	1.1	1.1	1.1	179.35	0.00032669	3.615
0	0	0	0	0	0	0	0	0	0	0	0	0	0	0	0	0	3543800	0	0	0	0	0	0	0	0	0	0	0	0	0	0	0	0	0	0	0	0				3	3	3	2.2	2.2	2.2	214.41	0.0030942	2.3121
18319000	60033000	30604000	26818000	0	1243800	18173000	23676000	39302000	46657000	0	1087800	9578000	32570000	15087000	13504000	9137800	17062000	8515200	30518000	17612000	22191000	92904000	11865000	11945000	15321000	38317000	15866000	12354000	19785000	15929000	17876000	53612000	24715000	122900000	37978000	48822000	43476000				1	1	1	6.2	6.2	6.2	16.332	0.00092593	3.0624
6935700	28341000	27632000	0	22874000	12023000	6699800	12553000	27523000	38887000	0	0	21792000	57674000	33979000	25879000	8830000	14295000	0	0	0	4436900	0	22587000	19167000	21963000	26986000	46473000	24614000	22925000	22366000	42002000	15178000	0	28116000	0	17046000	34711000				5	5	5	15.2	15.2	15.2	58.32	0.00034095	4.1792
95167000	181480000	232970000	0	192120000	45581000	215450000	234160000	254220000	138430000	798330000	119840000	0	29020000	140650000	163840000	228460000	462400000	31366000	143280000	159780000	0	0	184420000	276880000	356250000	499900000	306700000	337400000	374210000	521710000	239890000	179250000	82027000	75083000	30772000	145010000	236780000				2	2	2	14.9	14.9	14.9	20.108	0.00033852	4.0577
87516000	21135000	0	0	8032800	23976000	14187000	2571800	0	8221500	0	6900700	7301500	34913000	25998000	25404000	59959000	0	9782400	11343000	12062000	0	0	15977000	19638000	26957000	33163000	14695000	23618000	19019000	22205000	25433000	10523000	24541000	9401800	0	9117300	9762800				1	1	1	4	4	4	32.261	0.00033256	3.8584
1098100	1459800	0	0	378840	0	0	0	0	2702700	2413800	0	0	0	0	0	1103500	0	0	0	0	0	0	0	0	2333900	3236200	2665000	1859800	0	0	0	1600700	0	1396700	0	2019200	0				2	2	2	5.8	5.8	5.8	62.105	0.00062305	3.1678
56921000	61573000	29896000	53420000	95890000	118810000	75790000	53146000	47327000	47917000	117060000	118760000	99724000	54199000	125400000	90489000	41627000	1395900	0	55932000	60880000	100400000	34432000	86886000	156920000	105490000	94635000	68790000	84267000	140930000	132910000	142980000	67172000	50523000	54981000	47852000	64124000	99221000				3	3	3	21.5	21.5	21.5	38.542	0	21.567
84582000	85103000	90804000	92431000	110870000	126020000	75900000	116680000	91152000	89822000	95223000	94026000	113300000	91585000	100100000	66230000	65929000	47024000	39928000	19869000	167780000	50406000	99511000	72317000	76741000	60979000	35426000	65832000	54545000	71913000	57373000	79330000	63797000	26463000	82269000	64498000	91059000	85659000				8	8	7	33.9	33.9	31.3	54.099	0	99.298
183590000	331740000	131580000	159180000	161760000	149220000	161830000	177830000	271110000	173650000	139330000	135820000	136620000	119200000	141500000	130610000	161170000	166300000	193950000	96650000	165620000	141630000	208740000	257930000	246570000	287930000	245330000	182310000	199530000	209710000	164640000	237900000	130580000	231480000	261780000	242520000	125420000	266090000				9	9	9	23.4	23.4	23.4	60.977	0	139.21
52859000	41671000	42017000	38201000	33049000	23123000	41140000	60378000	26130000	29390000	19087000	29503000	24200000	45386000	28291000	27104000	23493000	12323000	13231000	19566000	17991000	10457000	30647000	25651000	29830000	26261000	18091000	27760000	20314000	24153000	25190000	29233000	19774000	27238000	31765000	27166000	24245000	23382000				7	7	6	22	22	19.7	70.832	0	30.821
9631900	27204000	15433000	28326000	16331000	13755000	20016000	14381000	18063000	17198000	14403000	38355000	21388000	3905300	14990000	23901000	17514000	11824000	16755000	13820000	14238000	14700000	31406000	23495000	26865000	33524000	21149000	33172000	30668000	25088000	24330000	14822000	14844000	17044000	9603900	14189000	11981000	13952000				5	5	5	9.6	9.6	9.6	88.828	0	81.526
6310000	9371300	11990000	18414000	17764000	24673000	17390000	12239000	12561000	9625800	43217000	17386000	22688000	25757000	11627000	17129000	0	9628900	0	29192000	0	19786000	12122000	11646000	10011000	10345000	10421000	10323000	14029000	12497000	14830000	12546000	11096000	10179000	13938000	8518500	8404800	0				4	4	4	7.8	7.8	7.8	90.254	0	27.33
9276200	15427000	16306000	8495500	6800900	11829000	12332000	12884000	8666600	9824900	0	11828000	13219000	14511000	18609000	12354000	10008000	0	11165000	10441000	10303000	38119000	8204100	2354100	3604200	1891300	1944200	3206100	10733000	4230600	10056000	1933700	17315000	13275000	9380200	16852000	4807800	7871800				8	8	8	12.9	12.9	12.9	121.78	0	46.599
210470000	257580000	430720000	238920000	285350000	324640000	383380000	237630000	301050000	432730000	385900000	551670000	208940000	432050000	365360000	479720000	354720000	671840000	554030000	524630000	342770000	593900000	340620000	423200000	719220000	551810000	687910000	470790000	506320000	408160000	451270000	307660000	339500000	383440000	329870000	334890000	437500000	390400000				18	18	17	39.6	39.6	37.8	74.977	0	323.31
2940400	6298300	7713700	0	0	9831200	10935000	3439300	7016200	3620100	6120300	14643000	4230000	5514500	0	4669000	4829300	5888700	6770700	4935400	4179900	0	4438000	0	7965400	5757900	9618800	12669000	12844000	9071800	9198000	4613000	6946000	5061800	4408800	4165500	4125700	3085200				3	3	2	9.5	9.5	7.6	60.982	0	5.997
0	0	16295000	0	17210000	0	0	0	0	51446000	0	0	0	0	0	5125100	0	0	0	0	0	0	0	0	0	0	0	0	0	0	0	0	0	0	0	0	0	0				1	1	1	1.4	1.4	1.4	138.1	0.004882	2.0834
6340500	0	1241700	0	562640	8372400	0	834950	0	0	0	0	0	8586300	0	1109900	4453000	0	0	3687400	0	7868500	854990	0	0	2824100	3141800	14177000	0	0	22640000	0	0	0	5970800	3936300	2597200	3535100				1	1	1	15.1	15.1	15.1	15.548	0.0028563	2.4584
304930000	194400000	120470000	172680000	183700000	166340000	168340000	133820000	169030000	247310000	252850000	184680000	112880000	184580000	211590000	163520000	203170000	180880000	212020000	179010000	214800000	129960000	182890000	164800000	179100000	199740000	201800000	164870000	154800000	160650000	189290000	190560000	150670000	142220000	192510000	222800000	172400000	166050000				9	9	9	42.5	42.5	42.5	39.124	0	303.4
1076200000	991530000	756150000	899710000	1010800000	882490000	1046400000	754340000	1139900000	941870000	750720000	742580000	654200000	753690000	954580000	838010000	1091800000	986150000	887680000	917580000	854020000	673780000	804390000	810990000	789920000	1017900000	970780000	954110000	892310000	914950000	953870000	776550000	858630000	735050000	890920000	659720000	798850000	931920000				17	17	1	31.8	31.8	2.7	70.942	0	323.31
12536000	34065000	32069000	0	5456900	50462000	34933000	27720000	65963000	33426000	36435000	25276000	0	49446000	0	7581100	28692000	10761000	33851000	16405000	24166000	42868000	33258000	1074700	8259500	0	0	19678000	33148000	0	13449000	0	31694000	38702000	31068000	14990000	11150000	15789000				17	1	1	32.1	3.1	3.1	71.214	0.0030856	2.2861
10024000	6732800	3276600	9057200	0	15859000	6909100	5984100	4930800	3861100	0	0	8905300	13248000	10079000	0	7771500	0	4293200	3718500	6815000	6057800	0	0	4736700	3597800	2580300	4565600	6712800	3765300	3446100	3364400	2407900	10076000	15987000	3948900	5581100	21489000				4	4	4	14.5	14.5	14.5	77.528	0	30.05
229280000	181100000	115970000	135440000	96441000	171700000	141670000	185150000	81432000	132850000	128440000	194360000	160480000	62923000	113810000	100450000	58012000	0	21049000	145880000	211660000	91641000	224310000	101320000	133850000	190540000	176490000	82047000	119380000	68933000	242900000	139770000	152940000	165800000	152130000	250330000	186000000	115790000				7	7	7	45.3	45.3	45.3	32.251	0	51.428
9365000	25589000	5102900	4384200	3122600	13262000	7331900	8121800	6969400	7347500	8397400	12915000	6905000	7108000	5163800	10805000	7145400	0	12603000	4904500	14066000	25050000	12670000	2700300	3361000	0	0	5769500	0	5971000	1796400	0	3391900	4876800	6204000	5896400	7078400	14263000				1	1	1	14.8	14.8	14.8	14.542	0.0055925	1.9852
105630000	112180000	145480000	115030000	105680000	113340000	102440000	75634000	147970000	105480000	135570000	95364000	96825000	92673000	124090000	179850000	108220000	178930000	98453000	170760000	148770000	173620000	159950000	98377000	145280000	94254000	79309000	119720000	114020000	132830000	158680000	110240000	136620000	125640000	123600000	141350000	125180000	126890000				14	14	14	14.9	14.9	14.9	173.1	0	153.02
14258000	0	14187000	11407000	17252000	0	30549000	7598600	26028000	5397400	0	40691000	15345000	2863000	0	5969200	12747000	0	0	0	0	0	0	10185000	8802600	8540400	40526000	15374000	5621800	13728000	9740200	7969200	11664000	16172000	0	0	6532100	3502100				2	2	2	9	9	9	41.21	0.00063371	3.3207
24164000	24329000	29890000	20138000	17002000	30470000	24500000	29077000	28425000	26009000	16312000	28255000	23927000	27092000	36289000	21647000	22855000	0	29882000	22311000	14305000	11163000	21728000	39438000	24942000	12405000	17784000	18992000	30345000	14046000	20488000	20608000	23398000	26845000	16090000	18727000	20220000	23180000				9	9	9	10.4	10.4	10.4	146.87	0	23.471
33118000	50765000	33902000	25668000	19373000	44653000	52445000	25451000	18909000	25750000	13446000	22807000	28351000	39093000	36577000	34706000	42505000	56346000	0	25866000	45990000	18023000	25859000	47298000	81723000	86783000	63658000	36088000	72613000	40896000	59295000	82295000	19659000	40736000	36516000	62566000	19821000	63904000				3	3	3	32.2	32.2	32.2	19.208	0	69.734
15316000	0	27185000	2426900	15121000	16662000	5088800	28677000	16131000	19027000	17105000	30534000	14451000	31245000	0	23748000	11475000	0	20294000	0	18512000	15454000	2793500	15943000	24446000	19181000	25282000	17174000	22761000	25543000	32836000	24701000	24704000	20828000	13049000	0	23904000	9851100				2	2	2	5.8	5.8	5.8	39.913	0.00032776	3.6471
63925000	24921000	26926000	43293000	69936000	172900000	70948000	37723000	81958000	26107000	0	30598000	74780000	57410000	61829000	46806000	35533000	61294000	48654000	107660000	39054000	2753500	51980000	45551000	45914000	80314000	108650000	33108000	32376000	63300000	81864000	0	69778000	74830000	39573000	17078000	51712000	18938000				2	2	1	9.5	9.5	5.3	39.589	0	12.382
2907500000	2108900000	1637700000	2309700000	3061400000	2528300000	2140600000	2084900000	3022100000	2365600000	4073600000	2553200000	3018100000	1857700000	1772200000	1926100000	1819600000	3629200000	2654000000	2895000000	1861500000	2324900000	2351200000	1860500000	1624700000	2216700000	2602100000	2032300000	1822700000	2210700000	2723500000	2560500000	2041700000	1976900000	2782500000	3268200000	2522000000	4173300000				8	8	8	17.3	17.3	17.3	83.801	0	323.31
141450000	83522000	75348000	220320000	66264000	95254000	57107000	96830000	55013000	78903000	125690000	49965000	65405000	73820000	48138000	58371000	80829000	74767000	69509000	49010000	83465000	70146000	74797000	89397000	82550000	106500000	164950000	67966000	69021000	74086000	89411000	122950000	76950000	142490000	111270000	104150000	93792000	177180000				4	4	4	85.7	85.7	85.7	9.6138	0	152.06
0	17667000	27693000	0	0	0	0	18094000	0	18437000	14872000	0	22701000	12440000	15724000	14068000	0	0	0	0	50931000	0	0	11951000	17377000	15673000	16526000	13483000	11268000	23678000	17844000	16309000	0	0	14980000	0	20523000	0				2	2	2	6	6	6	47.119	0.00033467	3.9442
0	0	0	0	0	0	0	0	0	0	0	0	0	0	3326800	0	0	0	0	6357200	4419400	0	0	2282600	3156000	3454800	7281900	3058600	0	0	0	3061200	0	0	0	0	0	0				2	2	2	7.6	7.6	7.6	50.699	0.00035778	4.9896
6005600	0	0	10138000	5774500	0	3550000	0	0	0	6076600	7732100	0	0	0	4832500	0	0	8677200	15848000	0	15563000	0	2834700	0	0	3570300	2964900	1877100	2287400	0	6019400	0	4212700	2345900	0	6429500	0				1	1	1	11.1	11.1	11.1	22.092	0.00034904	4.5352
20114000	8164300	11695000	17697000	9604800	18119000	14087000	21449000	10315000	13222000	11868000	10718000	18713000	17591000	4284200	12519000	17408000	0	8277600	8780300	14582000	15808000	21099000	15210000	14803000	16243000	11933000	13660000	23554000	11797000	10247000	14158000	15790000	16291000	11418000	17716000	11987000	18978000				8	8	8	15.1	15.1	15.1	109.96	0	24.162
0	2823100	0	0	0	0	1356200	0	0	1008400	315530	0	0	883360	705780	908290	2109500	1136900	0	0	1111400	0	0	0	0	2855100	676930	0	2307200	0	0	463790	0	0	412230	0	0	0				2	1	1	7.8	3.1	3.1	40.044	0	10.725
15903000	14947000	11541000	37405000	16478000	7280800	10823000	4052500	23830000	10098000	18984000	21326000	7912500	13326000	0	10423000	10353000	0	0	6569800	11926000	6095900	0	25710000	17696000	15632000	19296000	19509000	16522000	13671000	13504000	12097000	12958000	7990400	9746400	5303700	16739000	34513000				3	3	3	7.7	7.7	7.7	51.355	0	13.608
115420000	54751000	104450000	21338000	43696000	51148000	48532000	61776000	74882000	35453000	34691000	38545000	18551000	65087000	39235000	47157000	68632000	65561000	79730000	45077000	31323000	71719000	33369000	36598000	40063000	58703000	79959000	66991000	44308000	34756000	42531000	76402000	65063000	53468000	61493000	62966000	71610000	54696000				3	3	3	22.2	22.2	22.2	20.274	0	100.48
29827000	9307700	15040000	0	27500000	20089000	0	0	13939000	13327000	0	20596000	0	0	18446000	20919000	10440000	19671000	16028000	8576800	0	0	0	17177000	18768000	20959000	17635000	23799000	19238000	21120000	20010000	28736000	16989000	6447400	20448000	8023300	21678000	18152000				2	2	2	8.9	8.9	8.9	56.289	0	59.241
0	0	2976500	4356900	0	4883700	0	4567000	5314000	6126700	0	6461300	8405700	4741000	0	0	6044300	0	0	0	0	0	0	0	3721100	0	0	0	0	0	0	5287300	8255900	0	2742100	4338500	5209000	0				2	2	2	10.8	10.8	10.8	19.608	0.0025914	2.5059
72125000	0	64501000	75618000	0	0	0	61311000	76366000	90492000	129730000	0	99215000	72308000	59974000	0	0	50467000	68498000	243820000	83353000	0	0	56604000	74917000	86475000	75274000	74262000	117040000	73208000	100000000	105120000	51995000	41317000	0	0	0	66825000				2	2	2	5.6	5.6	5.6	49.692	0.00035137	4.6552
14678000	72901000	46065000	0	78968000	33087000	0	31411000	21184000	54825000	0	20461000	46573000	11066000	33479000	33794000	0	47905000	24290000	81393000	5003000	0	22464000	4862100	83847000	0	81872000	70809000	70818000	98519000	99502000	56766000	73776000	97675000	55588000	108340000	46501000	0				2	2	2	14.5	14.5	14.5	8.4908	0	8.7532
547130000	649880000	579890000	299200000	309010000	432160000	406550000	524180000	394240000	325540000	411560000	528230000	417890000	436100000	441970000	335370000	694740000	441680000	645090000	419100000	429960000	627350000	327960000	424340000	466610000	773050000	674110000	446760000	454370000	573580000	620350000	544820000	418760000	384440000	372030000	345130000	471910000	484110000				10	10	10	58.9	58.9	58.9	38.792	0	114.82
256750000	190970000	140630000	234150000	158040000	154100000	105110000	158890000	138960000	207280000	281440000	148280000	147120000	164520000	147220000	157940000	117180000	266330000	143150000	190720000	167830000	148430000	195780000	151110000	149840000	217320000	249070000	198230000	133660000	139780000	169310000	140580000	114220000	217170000	136180000	187050000	154980000	265330000				5	5	5	32.8	32.8	32.8	36.954	0	50.462
2990900	2661400	3255100	1851900	0	9336500	4556300	1919800	1340900	2874800	3171700	0	4615700	7640800	0	5023500	0	10130000	6065700	0	4064700	8391300	0	2531800	1883800	1197500	1481100	1903800	4363600	2095200	2368200	2276800	4220600	4982700	1901400	5381900	2943100	3504900				1	1	1	8.6	8.6	8.6	26.103	0.00033738	4.03
2807900000	2532600000	1709900000	3991300000	2421700000	1949900000	1316400000	2371700000	2780600000	1620600000	2742200000	1557800000	2106600000	1673400000	1815800000	1233700000	1866400000	1418500000	2355400000	1569800000	2115200000	1919800000	2409000000	1945700000	1536400000	2274000000	1946400000	1710000000	1417900000	1933000000	1645700000	2318000000	1562000000	1584300000	1785200000	1796200000	1307500000	1842000000				31	31	20	47.4	47.4	33.5	104.85	0	323.31
3699800	15555000	9413500	7458700	0	0	18371000	5287500	2534500	13000000	5231000	21573000	24457000	12447000	8765900	18892000	9171900	0	0	8366800	9442100	12482000	5578900	14436000	33944000	17805000	16561000	18613000	21386000	22131000	16367000	16198000	6539300	14012000	21457000	37711000	2271000	13130000				2	2	2	5.7	5.7	5.7	85.852	0	29.197
4206200	0	7367200	3991600	0	17698000	0	4810300	0	8578800	0	9169800	0	11007000	0	3932000	0	0	0	0	0	0	0	0	0	0	0	0	0	4382700	0	0	0	5749100	0	10243000	0	0				1	1	1	6	6	6	46.291	0	22.929
83541000	181600000	159040000	181240000	158730000	107660000	204630000	151950000	111390000	165090000	147840000	192950000	150600000	179110000	140550000	137880000	155800000	144160000	94297000	135960000	134050000	153530000	101590000	143690000	145890000	110900000	109980000	147790000	137110000	107800000	136140000	93726000	147470000	163430000	163150000	198980000	120590000	182060000				11	11	11	24	24	24	91.35	0	323.31
2480700	3624900	3329800	2481200	0	6111900	5707300	4583700	2526600	3337900	2934300	6577100	4609500	7369600	0	11633000	12042000	0	2640000	7737200	0	7069500	5498500	3574100	5809100	3352000	3799400	3102800	0	1264800	1433000	1993400	2533200	6377900	2334600	5659900	2749900	5485800				1	1	1	8.2	8.2	8.2	29.176	0	10.52
314980000	160360000	240100000	0	0	142740000	176690000	495430000	500110000	0	198800000	107410000	33526000	137140000	125370000	218800000	135580000	230760000	127750000	149420000	182040000	144810000	68200000	197870000	301120000	197320000	320500000	184090000	160300000	197590000	222440000	158680000	260450000	196740000	166850000	80105000	304050000	381280000				1	1	1	6.3	6.3	6.3	21.038	0	6.916
0	21131000	20380000	0	0	0	8448200	14020000	20932000	23643000	17831000	12503000	8962000	13564000	15960000	28419000	12550000	0	0	0	13770000	0	0	20609000	49813000	28828000	32672000	14331000	31812000	0	38623000	37042000	19213000	20778000	14408000	13004000	21784000	16054000				1	1	1	5.2	5.2	5.2	24.555	0.0030641	2.2353
0	51394000	24031000	0	0	0	0	32996000	75240000	5556600	21095000	0	0	0	28176000	32209000	43199000	61109000	52980000	72736000	65818000	98204000	42844000	39081000	31515000	74089000	45799000	29028000	5201100	59361000	60012000	47623000	9821100	0	46130000	37097000	28204000	0				1	1	1	15	15	15	12.404	0.0025773	2.4756
164600000	149640000	96555000	116430000	171000000	175270000	158170000	143510000	132600000	102750000	118900000	180600000	163870000	145280000	126610000	191690000	181630000	147460000	175030000	144350000	218090000	136080000	121130000	102920000	111850000	154430000	135230000	117690000	120540000	99990000	147300000	142570000	93161000	85696000	110890000	102080000	134660000	123390000				9	9	9	27.2	27.2	27.2	62.942	0	174.99
10195000	14287000	1353000	25282000	0	0	0	6855500	10307000	8417900	18777000	5714300	8202200	8748400	0	8423900	7983300	0	0	9594300	0	12326000	38719000	4936300	5628500	8145800	2851100	8167700	17138000	4879700	14874000	7210100	11616000	6324700	14439000	9617200	6906900	0				4	4	4	5.8	5.8	5.8	124.95	0	15.363
1205800	3046200	0	2921700	1258600	0	1718300	2773500	0	0	0	4049400	0	3720400	0	710000	1620000	0	0	0	0	0	0	2917200	0	0	0	0	0	4241800	0	0	4323100	784760	2704900	2125100	0	0				1	1	1	10.9	10.9	10.9	13.596	0.0051407	2.0674
269930000	328470000	230620000	121100000	670240000	222170000	184230000	215550000	95991000	171240000	286960000	220750000	22526000	266800000	259370000	229940000	210530000	301880000	218310000	254870000	163430000	182250000	218560000	178810000	222590000	213180000	169260000	141870000	111110000	168790000	174950000	258320000	178130000	242010000	164410000	311570000	260000000	412590000				7	7	7	41.4	41.4	41.4	26.227	0	89.644
22483000	13337000	16244000	10677000	33946000	31947000	12620000	9070900	11638000	7066800	8356400	19244000	8971700	12950000	15941000	14532000	17347000	0	20752000	30351000	13515000	83053000	13607000	15059000	13862000	20741000	11741000	9964200	52754000	13661000	56083000	130210000	5702000	12864000	12917000	21960000	20727000	17999000				1	1	1	6.8	6.8	6.8	45.283	0	14.368
22631000	71258000	24672000	11513000	18586000	30633000	11036000	35287000	18407000	21662000	3161300	7005400	22748000	12253000	22603000	19337000	0	36817000	13408000	16011000	11105000	11971000	11954000	19483000	22499000	26828000	21801000	22127000	16658000	22094000	33834000	17699000	15282000	0	14686000	17669000	26916000	27225000				5	5	5	12.1	12.1	12.1	86.131	0	43.488
0	0	4058700	0	0	8692900	5406200	5270500	7083200	0	0	0	10204000	0	0	3165700	0	0	2328300	0	0	0	0	2245300	0	0	0	9635800	0	1124300	0	1611300	0	0	2799200	0	2048300	2594400				2	2	2	9.7	9.7	9.7	51.84	0	9.3053
33081000	43784000	19071000	7450400	73549000	42889000	45070000	22677000	22242000	22237000	49038000	70681000	22298000	18501000	26237000	26337000	53413000	22817000	46604000	52673000	37315000	43484000	0	30177000	32466000	29869000	24464000	60982000	50027000	32769000	46401000	21592000	21049000	37101000	28694000	26272000	24588000	21487000				3	3	3	13.8	13.8	13.8	46.36	0	89.622
292440000	359250000	348320000	163670000	327100000	453520000	275150000	257050000	252900000	287830000	336280000	191040000	167570000	203510000	257450000	295150000	246200000	383090000	322320000	445100000	624150000	378920000	204060000	268760000	298880000	371970000	489620000	427900000	428070000	428500000	569700000	287330000	261670000	337430000	304680000	218010000	290190000	383650000				7	7	6	24.7	24.7	19.7	42.183	0	122.58
8949300	0	11230000	0	8784800	0	0	9068100	0	0	9046400	0	0	0	8737500	0	6852600	0	0	0	0	0	0	4141500	8733800	0	7481000	6391600	5737400	7216400	8149500	9503200	5893900	0	6188600	10572000	7227500	0				2	2	2	3.9	3.9	3.9	131.57	0.00032895	3.6817
1512800000	813790000	410470000	971670000	711930000	590070000	489620000	822780000	994510000	411250000	366580000	582000000	631450000	724700000	382610000	210740000	739870000	456940000	549370000	450540000	437640000	372490000	581640000	370830000	254450000	647360000	301490000	558970000	511770000	326020000	389440000	552920000	282150000	446190000	411040000	331460000	520970000	445200000				9	9	2	39.7	39.7	9.8	37.106	0	323.31
13094000	11421000	4993300	4679700	7268000	0	7139000	11597000	4867900	6826600	5571600	18045000	20008000	11026000	11053000	5769500	13191000	808140	5257200	8441900	7400600	4342300	14644000	8123100	6927800	11958000	5046700	8252200	5103600	0	3130300	7652300	8980500	9071300	6366400	4780300	6533800	3415100				9	2	2	38.7	8.9	8.9	37.134	0	21.71
105380000	83279000	59373000	70936000	91188000	115710000	95033000	70817000	72757000	102660000	62091000	87566000	102850000	83646000	67512000	121230000	73173000	101100000	97982000	90865000	55482000	76750000	56594000	71249000	80070000	60735000	84859000	50479000	65504000	41747000	47012000	109170000	22096000	49709000	38202000	139880000	81148000	60209000				9	7	7	32.5	27.4	27.4	58.951	0	245.64
183380000	172580000	167620000	76432000	208040000	151790000	157460000	184690000	240230000	259400000	84556000	124240000	116740000	146810000	183770000	127050000	156310000	294080000	36345000	153640000	185510000	144540000	90411000	157210000	202270000	226970000	366430000	150170000	183960000	155040000	275590000	177180000	176770000	269680000	155700000	243320000	220660000	176080000				2	2	2	20.7	20.7	20.7	17.42	0	36.597
10874000	10313000	20537000	12874000	16630000	22755000	16041000	14666000	9974600	15536000	11562000	23780000	17457000	28704000	15229000	9505000	9438900	0	14168000	8704200	14866000	0	15123000	10918000	15879000	6471200	13020000	12042000	7449000	17495000	5779400	10144000	19495000	17573000	11808000	6378200	8237100	18608000				8	8	8	29	29	29	56.866	0	10.6
0	0	0	3302400	0	0	0	0	0	0	718130	0	1801100	0	0	0	0	0	0	0	0	0	0	0	0	0	0	0	0	0	0	0	0	0	0	0	0	0				1	1	1	10.1	10.1	10.1	37.454	0.0030821	2.2781
160030000	206020000	235370000	104830000	87660000	195920000	174200000	184160000	146930000	178400000	161220000	137240000	132230000	172620000	188810000	149800000	177360000	467630000	174570000	253660000	151610000	145180000	117150000	248410000	150590000	194930000	149730000	149790000	217430000	189180000	215780000	127830000	172080000	220750000	126020000	168960000	160050000	210800000				12	12	11	59.3	59.3	52.5	35.613	0	53.217
82043000	48980000	63040000	50662000	98490000	76272000	70690000	38936000	40525000	56954000	52553000	56009000	66493000	48443000	76829000	61641000	60025000	0	72394000	90012000	55600000	58611000	26808000	84026000	57294000	65942000	52312000	56062000	69982000	32850000	40661000	30611000	14517000	44272000	42616000	42570000	59119000	55679000				10	10	10	29.3	29.3	29.3	71.689	0	31.092
0	7832000	65798000	0	27748000	1732600	0	116290000	0	25781000	6437700	1003700	6333400	11540000	36619000	39317000	11558000	0	0	20139000	0	0	0	29254000	43337000	43518000	71676000	111740000	39245000	44478000	42843000	66729000	0	12134000	4698800	39002000	45256000	0				2	2	2	41.2	41.2	41.2	10.998	0	34.689
2134100	3938200	0	0	0	0	0	1796300	0	1301700	0	0	0	0	0	0	8093000	0	0	0	0	592630	3192200	0	4233300	5299200	1815900	5164400	5142900	4797700	4924400	0	1127200	0	1564300	1777500	0	0				2	2	2	2.3	2.3	2.3	119.26	0.00062441	3.1824
11866000	21680000	17526000	0	13404000	12569000	13837000	0	0	13163000	14527000	8149200	7461700	10021000	13986000	12366000	13956000	24251000	0	29606000	17287000	29046000	9427900	14095000	12639000	11408000	6489600	10612000	10040000	10500000	7376300	0	8876400	9722700	12273000	8174800	16225000	0				2	2	2	23.6	23.6	23.6	21.474	0	48.021
4520800	3814500	0	2309600	0	0	3606000	2853300	0	2762100	0	0	0	10631000	2294900	5597900	2122600	0	0	0	3432200	5469800	0	0	4662400	5195600	2913800	2568300	0	6634800	4679600	2721500	4156100	3986600	3509100	0	3240100	2961900				3	3	3	4.7	4.7	4.7	116.07	0	5.9094
76159000	81144000	65353000	32123000	30566000	44643000	63223000	60142000	53489000	42328000	37170000	31077000	38147000	46387000	23479000	36226000	32748000	41912000	39063000	37456000	38067000	33475000	52085000	43402000	29690000	43881000	26267000	44564000	33501000	29441000	61607000	24611000	46322000	66781000	45319000	51904000	53071000	111730000				8	8	8	35	35	35	40.925	0	108.63
30148000	21821000	14266000	38852000	24511000	24836000	18596000	31085000	24440000	11877000	13509000	18353000	28007000	24407000	24157000	33431000	35261000	0	55464000	48976000	0	40890000	76634000	26910000	35458000	45062000	51029000	46281000	53755000	71653000	82343000	33619000	33347000	52725000	57630000	25281000	34034000	0				1	1	1	23.5	23.5	23.5	7.5217	0.0012311	3.0436
42484000	70449000	34238000	34084000	36945000	26959000	50341000	41543000	58514000	42239000	55153000	26191000	46558000	23975000	40361000	20201000	25635000	100170000	20045000	15670000	26791000	11240000	20841000	17272000	7349600	20147000	44242000	24318000	57283000	32033000	43429000	34076000	46646000	40048000	68474000	47313000	35920000	41630000				9	9	7	10.7	10.7	9	121.9	0	19.674
15649000	448590	27493000	17599000	10817000	34552000	18019000	7222800	9734300	6507700	9249100	13802000	6835200	12942000	9533200	18006000	24341000	38621000	0	3769500	23266000	19573000	1191800	13764000	10818000	11286000	12516000	17888000	11617000	9672500	12617000	14928000	5298200	32989000	10449000	5362200	12360000	4647900				5	5	5	8	8	8	128.61	0	123.22
43361000	68956000	53363000	69689000	30692000	73550000	88844000	53058000	64887000	43160000	56962000	39308000	54835000	72096000	41941000	52567000	61835000	47263000	43963000	124520000	58985000	58280000	58617000	34699000	45435000	39531000	54859000	54215000	53552000	39815000	65293000	46904000	69216000	69730000	47144000	46580000	47295000	38352000				12	8	8	18.5	12.2	12.2	109.49	0	117.48
3186400	0	4548900	2061900	0	0	6477800	0	1912500	2974500	0	3398600	0	4769900	0	0	0	0	0	6069900	3849300	5378100	6981200	0	0	0	0	0	0	0	0	0	9725800	16723000	0	3826500	2579400	0				1	1	1	0.9	0.9	0.9	180.92	0.0025997	2.5176
9236400	14270000	11611000	15398000	8860200	11100000	19771000	7472900	7192800	10083000	6789000	12768000	10052000	11301000	6296200	22683000	9825400	9335600	16384000	16218000	8634900	14311000	11250000	8047900	9956100	10316000	5326700	6207200	15394000	0	13748000	0	8732800	11479000	25491000	14681000	9593500	15703000				7	7	7	9.8	9.8	9.8	171.29	0	25.208
88366000	101380000	121540000	130760000	102810000	102240000	168990000	104410000	128300000	122340000	141980000	159320000	94081000	111130000	124660000	127810000	79201000	150060000	238030000	107890000	145950000	99425000	136380000	137610000	115430000	95351000	102660000	87599000	91702000	110940000	98161000	88487000	104480000	141180000	75793000	159710000	145890000	127370000				12	12	12	19.6	19.6	19.6	107.57	0	125.34
37315000	45405000	25565000	27719000	10226000	31250000	20599000	31121000	12453000	22910000	38931000	35956000	35006000	34813000	33958000	45040000	20425000	43970000	31595000	43769000	35214000	23480000	44576000	18118000	32955000	32696000	95085000	25071000	22225000	38741000	41200000	24200000	22177000	24513000	22746000	43612000	51708000	28643000				3	3	2	10.9	10.9	8.8	70.213	0	30.936
4640800	0	0	5054600	0	3023900	0	4185900	0	4722400	0	0	0	8912100	0	1930000	9996300	0	0	0	0	0	0	5742000	12167000	10988000	4970500	7836700	0	0	0	0	0	6396000	4412600	0	0	0				6	3	3	6.8	4.3	4.3	199.26	0.00033102	3.7868
34652000	28014000	33801000	21240000	17512000	36363000	14115000	21789000	34649000	21051000	28913000	45190000	21661000	35185000	18488000	21970000	41210000	84996000	56688000	21569000	17179000	39099000	0	39434000	33566000	46131000	24151000	22679000	15452000	18767000	32706000	32198000	17443000	38966000	32802000	33849000	32074000	44507000				9	9	9	22.2	22.2	22.2	92.902	0	39.383
79847000	46997000	59350000	86461000	48815000	108620000	60423000	45081000	58126000	74303000	76883000	34156000	58192000	47322000	32613000	31569000	58821000	2892400	106380000	0	49331000	47792000	68607000	28388000	38840000	54315000	37312000	66795000	42631000	38387000	51166000	46061000	68077000	68046000	41216000	35334000	60290000	18300000				5	5	5	47.5	47.5	47.5	18.762	0	29.616
102400000	138740000	107950000	133770000	33375000	77393000	112400000	150220000	111730000	103530000	91418000	85694000	96399000	115880000	82606000	66564000	48285000	94989000	86467000	77628000	75048000	64726000	99582000	85954000	81634000	80328000	68380000	84565000	79837000	67578000	94972000	82166000	52264000	93804000	52858000	90210000	73425000	70994000				13	13	13	27.7	27.7	27.7	102.91	0	87.449
25930000	0	0	7113500	0	0	6165000	12927000	12105000	5273800	0	0	13053000	6230400	3552300	6810600	11318000	0	0	0	0	5652000	8585600	0	0	12921000	9396900	4042300	0	6231900	5224400	0	5567600	5978600	8423100	6175300	7231000	6022600				2	2	2	4.5	4.5	4.5	75.34	0.0015029	2.8134
302290000	388510000	316780000	198240000	300730000	346550000	321050000	291080000	389690000	310780000	298620000	335200000	381430000	334430000	386660000	203990000	276640000	428900000	429260000	429830000	349450000	294400000	377910000	295650000	241640000	331800000	299220000	280610000	310970000	294230000	297140000	258030000	277200000	379670000	261100000	313410000	210620000	355580000				16	12	1	34.7	29.1	2.6	69.602	0	323.31
13122000	0	9085300	0	12711000	6029500	8823000	0	27561000	11246000	0	7330500	10992000	6283200	17496000	0	11135000	0	6776400	24821000	0	0	0	10563000	10029000	12603000	11085000	8956100	8425300	9433600	0	8574600	10609000	0	9577400	4042200	12897000	0	+			16	1	1	37.4	1.8	1.8	62.656	1	-2
8660500	22165000	17197000	7637900	0	6456400	0	19381000	6650700	15622000	8131500	6296400	13077000	31358000	13926000	5399100	8935200	0	7908600	14462000	18397000	0	4489800	12261000	8081200	9780900	7687800	7751500	11758000	16065000	10614000	12675000	7083800	23358000	15860000	32639000	6809300	34387000				6	4	4	10.5	8.8	8.8	124.71	0	48.157
3292800	2846500	3410800	0	2445400	3916900	3851600	2762000	1954400	3078100	1896300	6039400	0	0	2422500	1949800	0	0	0	2461600	1929800	0	0	0	0	0	0	0	0	0	0	0	1912000	2610000	2270500	2319600	2899800	2492300				2	2	2	4.3	4.3	4.3	118.02	0.0023634	2.6691
6978500	2110700	3191000	4299100	18329000	5618500	3778800	4555800	6818100	2750100	8614800	0	6745500	0	4188400	0	5231700	5503000	4031900	5357400	8267600	15516000	4114100	0	4909600	12233000	7143800	10720000	13606000	11817000	8360000	7815800	3282900	6118500	7534400	5013600	4892500	3034200				6	6	6	8.5	8.5	8.5	138.91	0	22.699
263090000	324730000	252290000	210470000	228620000	328780000	370270000	237420000	185430000	261760000	330790000	316760000	332530000	311230000	300510000	440270000	209000000	251940000	418550000	338890000	267780000	433710000	229900000	162220000	191400000	209660000	195340000	200350000	339270000	209710000	199150000	97141000	254700000	447980000	219870000	384720000	175840000	264470000				7	7	6	9.8	9.8	8.4	89.655	0	323.31
2111800	2695600	1271600	2081100	0	0	0	2235500	1406500	2512300	0	1174300	1931400	938360	1698600	0	1563800	0	0	0	0	0	0	1245800	0	0	0	0	0	884720	0	0	893560	1922900	1499400	2539100	0	0				2	2	2	4.2	4.2	4.2	73.796	0.0015124	2.873
116700000	103330000	94715000	109220000	75824000	103930000	103050000	84921000	76295000	70421000	90584000	106330000	88176000	121490000	85065000	117360000	116370000	70869000	111590000	116300000	81990000	110030000	89177000	81573000	83871000	78138000	67060000	62753000	70792000	70968000	89858000	98857000	80378000	124820000	87674000	106390000	68310000	172560000				9	9	4	35.1	35.1	20.3	60.029	0	323.31
2278700	6619400	2917900	5099200	6487800	0	8038600	6742200	6219800	2968800	2896700	3575500	4925000	4508000	5607700	3775600	3797400	0	0	0	3667000	0	0	6468500	3500600	3812400	4405300	3143900	3650000	4121100	4880600	3299200	4660100	3065700	6486700	7636400	4572900	5299800				4	4	4	13.6	13.6	13.6	47.602	0	17.859
71288000	119220000	68601000	100900000	71885000	76434000	80900000	101160000	99788000	79870000	80792000	111950000	76806000	68957000	83622000	91679000	120890000	68968000	62957000	16400000	29283000	64657000	81042000	71854000	66221000	86710000	60405000	59464000	60520000	91034000	63065000	88668000	75274000	43771000	79555000	96021000	61064000	63850000				12	12	12	22.9	22.9	22.9	90.283	0	157.12
11007000	16223000	14478000	6153900	13213000	0	25971000	14535000	8853000	12929000	0	6749200	13136000	0	19221000	14999000	10905000	24456000	20708000	19091000	0	11848000	11698000	14790000	15155000	12252000	9995100	33281000	19226000	7502000	21021000	12205000	0	0	10951000	8681300	9152500	5493700				2	2	2	10.9	10.9	10.9	31.938	0.00033841	4.0561
5388600	6315000	4405000	5871000	1821800	10111000	6686000	3798100	4035400	3016300	0	0	6115700	13236000	0	7509200	0	0	12507000	6668000	6805400	10789000	0	0	0	0	0	0	0	0	0	0	9110100	6856200	6688500	4593300	4899800	4054200				2	2	2	6.6	6.6	6.6	84.092	0.00033245	3.8542
157800000	119840000	182570000	128660000	85971000	196100000	245300000	145530000	109860000	136400000	129890000	154100000	177450000	106380000	188020000	225350000	158630000	343800000	215060000	135470000	175800000	246360000	143270000	126760000	155280000	132450000	140990000	102410000	136780000	126350000	90107000	146430000	112700000	159980000	115960000	191190000	150710000	157600000				6	6	3	74.3	74.3	40.7	12.823	0	288.71
37108000	78912000	76270000	48731000	90938000	99987000	59578000	50271000	52457000	72372000	55505000	66030000	126080000	108040000	78185000	80143000	83618000	52389000	101710000	151320000	110420000	112400000	80060000	61849000	63611000	59290000	69663000	68998000	53571000	57291000	89659000	74463000	69181000	62086000	66415000	62016000	89116000	71748000				9	9	7	17.3	17.3	13.7	98.795	0	323.31
67490000	74494000	60063000	46816000	42512000	41692000	48758000	78352000	59899000	69705000	115160000	35674000	61143000	60166000	68871000	45552000	127930000	57316000	97916000	65755000	67335000	62802000	0	38587000	49476000	73832000	87026000	52772000	29191000	64607000	53142000	68170000	38846000	27384000	21887000	100740000	50025000	58233000				6	5	5	21.6	19.2	19.2	46.097	0	104.64
24199000	59902000	30475000	30880000	58772000	44984000	45675000	41358000	34152000	25321000	17236000	40798000	27818000	65366000	7932100	34319000	24646000	16880000	67203000	38434000	49758000	45236000	53790000	21461000	24441000	24521000	21815000	32030000	44220000	33904000	23289000	22552000	38723000	31943000	25038000	21079000	34640000	32632000				5	5	5	27.7	27.7	27.7	29.634	0	16.394
169440000	175560000	144380000	135910000	109490000	129220000	106130000	128770000	133090000	89009000	162480000	73507000	63408000	169130000	115460000	98554000	130730000	119390000	70055000	140540000	134270000	120250000	118990000	142340000	136890000	170930000	122540000	111400000	147460000	121010000	190740000	172590000	96476000	173400000	129550000	130910000	118030000	164760000				13	13	13	21.2	21.2	21.2	107.89	0	175.57
81130000	42570000	60684000	86366000	72040000	61812000	56428000	76382000	64776000	62992000	49969000	45733000	104120000	70830000	43676000	57955000	89939000	56485000	58114000	50830000	34877000	37898000	39792000	45756000	55182000	59206000	48436000	64664000	91302000	81241000	46713000	83648000	28327000	82032000	54555000	81316000	53579000	76250000				5	5	5	17.7	17.7	17.7	53.818	0	184.44
4911300	5520900	5095800	7203200	0	3866800	3784400	5809700	2150900	6858100	0	2880800	15557000	0	0	0	5112800	0	0	0	0	1159300	0	4874800	5505900	2335000	5708700	3093900	0	0	1899100	0	0	0	4422100	0	5235200	4900700				3	3	3	9.6	9.6	9.6	54.406	0	6.4051
24534000	12605000	0	0	8945800	0	10872000	25346000	9646300	0	20150000	5541800	11524000	0	0	6852500	8967700	0	0	0	28786000	8747800	24978000	8689400	0	0	8532800	5515600	7632400	7709500	7559600	10236000	8374100	26295000	9769400	8106600	15016000	18717000				3	3	3	8.6	8.6	8.6	70.755	0	323.31
0	0	12224000	0	26300000	46916000	27745000	0	0	0	0	24104000	0	19365000	14015000	26372000	0	0	0	10750000	0	0	0	15321000	15569000	0	0	13899000	8536800	14073000	16713000	0	3583300	0	0	7909400	0	5002800				1	1	1	43.3	43.3	43.3	6.9808	0	14.452
1816000	4995900	0	0	0	3054000	0	0	0	0	0	2685800	4197000	0	0	0	0	0	0	0	0	7080500	0	7046300	5104700	0	24710000	0	16021000	0	7554800	5258800	0	0	0	0	0	0				2	2	2	26.2	26.2	26.2	18.273	0.0053619	2.0212
39052000	98863000	103370000	98379000	69417000	28269000	122000000	88321000	88103000	96087000	107310000	134260000	77878000	58317000	74081000	132760000	63491000	73480000	30074000	26629000	29845000	29179000	75123000	100910000	188380000	84202000	76703000	95454000	92251000	86709000	107040000	84174000	86096000	89280000	88352000	152870000	70562000	59163000				2	2	2	16.3	16.3	16.3	19.258	0	247.04
37498000	56322000	3120200	58628000	3711700	42980000	43846000	35583000	49823000	88907000	33185000	28621000	22200000	38706000	31836000	35779000	22604000	14109000	559960	32629000	24137000	0	31642000	217550000	31728000	46908000	86541000	67067000	42209000	44522000	41157000	22827000	30918000	53046000	28365000	15079000	14264000	19104000				3	3	3	15.7	15.7	15.7	47.602	0	5.6229
53784000	64967000	58470000	65074000	104270000	36949000	20177000	41078000	20319000	29055000	66640000	0	42844000	92210000	38190000	31078000	28711000	48754000	43971000	19081000	42376000	16595000	36878000	34368000	36188000	53366000	44165000	54060000	48431000	47908000	56325000	44522000	24893000	26542000	38642000	38168000	21249000	29442000				7	7	7	10.8	10.8	10.8	138.83	0	31.171
0	0	0	0	0	0	0	7840300	0	0	0	0	4584500	0	0	0	0	0	0	3606700	0	4466400	0	0	0	0	0	0	0	0	0	1833800	0	0	0	0	0	0				1	1	1	5.7	5.7	5.7	54.371	0	8.5028
0	0	0	0	0	0	0	0	40385000	0	4620000	0	0	0	0	21542000	0	0	0	0	0	0	0	22281000	25304000	19351000	11128000	15087000	26002000	25055000	18654000	23205000	0	0	0	0	0	336780				1	1	1	8.6	8.6	8.6	15.48	0	9.47
165900000	117340000	162670000	141710000	165540000	191310000	238600000	152570000	118430000	157300000	99067000	256410000	151320000	213920000	149950000	182050000	122440000	195670000	184570000	151510000	139680000	144220000	126660000	131410000	166470000	94596000	82493000	101250000	130250000	148970000	102390000	96957000	142910000	226330000	200600000	217440000	180070000	174750000				8	8	8	41	41	41	45.745	0	203.41
88857000	94567000	93584000	128480000	71031000	101040000	149860000	76267000	82912000	83030000	123530000	108540000	156300000	217600000	83373000	107620000	115930000	84642000	156700000	99678000	117390000	136470000	111460000	94970000	62378000	59793000	67436000	74796000	105810000	61355000	60242000	69907000	118900000	200560000	74713000	141490000	108630000	75419000				3	3	3	29.5	29.5	29.5	16.832	0	5.6256
34216000	63811000	42244000	46860000	0	47241000	48191000	46028000	0	19826000	22884000	82905000	55674000	71401000	32046000	32061000	35749000	26488000	0	0	27573000	65338000	0	29448000	29927000	16781000	20827000	25508000	36681000	0	14403000	26107000	24701000	89183000	29011000	27387000	41487000	93642000				4	4	2	13.9	13.9	5.5	57.048	0	75.914
25204000	34465000	49644000	73767000	34822000	60560000	40746000	43408000	29634000	31171000	71962000	39087000	44416000	31569000	27964000	37718000	31447000	27630000	28419000	42577000	58494000	173340000	66109000	44588000	51099000	44880000	125700000	52354000	35775000	48963000	33980000	51274000	48324000	30717000	38709000	58423000	39535000	70966000				2	2	2	16.4	16.4	16.4	14.21	0.00035373	4.7859
11366000	8499100	9722000	15685000	0	0	17348000	8519600	8073300	10723000	38563000	28588000	14591000	15322000	10741000	13927000	17025000	20157000	8346900	6873000	9541800	8405000	7897500	7806800	9181000	14142000	9301900	0	14326000	18341000	0	0	9080400	10010000	7562200	8803600	11400000	5496300				2	2	2	18.3	18.3	18.3	22.629	0	28.564
184150000	226890000	101740000	220360000	173430000	101800000	106900000	327750000	501220000	410340000	0	587850000	19267000	375050000	187780000	143690000	312800000	362800000	145210000	89786000	165250000	101840000	178970000	171910000	138250000	232600000	127080000	191140000	147870000	174940000	125700000	331020000	138350000	61112000	306140000	0	164730000	676370000				1	1	1	8.9	8.9	8.9	13.79	0	166.65
19888000	34929000	5522900	32760000	17143000	19460000	38962000	25779000	33435000	10868000	34276000	52763000	21049000	13540000	24915000	40308000	39586000	0	6031500	904100	11483000	37076000	68473000	49573000	29068000	52169000	24285000	12217000	21753000	29695000	20726000	28372000	22397000	0	10346000	12802000	88325000	0				7	7	5	23.5	23.5	15.9	59.771	0	10.862
3693900	1050600	3509100	3138200	0	8537800	14241000	2318400	1628700	3612800	0	13664000	4959800	6997000	5430100	16558000	4222700	15608000	0	0	8300300	0	3407900	2989500	13888000	2342700	6365000	6642500	8430600	3940900	3875500	1698000	4099200	5872700	3877900	5507100	4284200	4338300				2	2	2	4.8	4.8	4.8	78.159	0	11.638
78472000	37722000	27126000	0	23168000	15909000	10812000	13973000	16913000	17169000	18427000	0	16316000	18061000	7314100	16409000	0	20456000	11874000	12943000	13307000	0	5530400	11908000	19063000	15653000	22297000	13536000	32954000	19139000	35379000	34337000	19517000	18357000	27949000	14741000	23454000	55685000				5	5	4	7.6	7.6	6.6	124.3	0	6.9834
5922500	7671200	7376900	12290000	3988200	5050900	12466000	7613100	9182800	9332600	9811200	7910600	11455000	22517000	6855300	6511400	5571000	2228600	5941700	6928300	7761400	5963600	7490100	3041600	1981800	3397700	2714600	3512100	13385000	6245000	4824200	2997800	5931500	13427000	6160300	6168100	5392400	7389800				3	3	2	4.9	4.9	3.7	120.87	0	6.8716
80510000	51618000	53420000	52989000	37907000	73832000	108150000	57359000	36943000	66022000	31388000	85809000	83405000	55538000	56816000	51243000	56197000	86576000	51170000	77786000	55327000	118960000	37737000	53570000	58382000	44474000	92286000	53660000	78987000	74759000	151420000	67583000	70603000	62225000	54235000	38345000	64682000	97521000				9	9	1	15.6	15.6	2.2	99.995	0	19.824
0	0	0	0	0	0	0	0	0	0	0	0	0	208820	0	217750	0	0	0	0	0	0	0	0	0	0	0	0	0	0	0	0	0	0	0	0	0	0	+			9	1	1	15	1.4	1.4	98.648	1	-2
7685400	6638300	6087900	0	0	6054100	12394000	12382000	0	0	0	0	0	12467000	0	5987900	7426900	0	0	0	0	0	0	0	0	14536000	43345000	0	0	0	0	0	0	0	0	0	8042300	0				2	2	2	11.2	11.2	11.2	33.775	0.00092393	3.0477
1086000000	609700000	385160000	835130000	762900000	553060000	540320000	750140000	685580000	594490000	723840000	592440000	743290000	805080000	623900000	686780000	1032000000	967400000	656770000	705700000	788660000	471810000	686900000	723260000	964970000	828260000	1011400000	674690000	655790000	783170000	841830000	1210300000	816700000	554470000	1034300000	501830000	739110000	1104000000				11	11	11	39.3	39.3	39.3	66.193	0	261.03
0	4481200	0	1129400	0	11339000	0	2113700	3786500	0	0	0	9425800	0	0	0	0	0	0	0	0	0	0	9666800	0	7222300	10199000	7862800	6306900	0	8105500	4679400	4322800	0	0	0	0	0				2	2	2	3.2	3.2	3.2	118.58	0.00036364	5.323
50645000	29073000	47092000	22135000	51691000	26547000	29004000	56294000	17160000	75744000	33540000	50118000	54701000	35943000	59593000	74604000	36461000	0	53555000	30968000	74895000	93870000	0	48009000	46531000	62817000	54462000	67106000	47348000	58932000	60803000	67205000	36031000	50523000	43598000	37028000	62913000	75684000				11	11	2	14.3	14.3	1.8	160.9	0	38.419
150870000	136420000	137460000	117820000	125500000	151860000	151750000	130770000	113070000	102060000	152780000	177750000	163480000	142470000	105690000	214520000	168940000	154530000	167250000	130780000	107230000	338280000	143290000	160850000	158870000	108040000	147230000	140540000	163760000	127330000	149980000	103530000	105490000	133460000	133710000	197850000	129240000	154220000				20	20	17	23	23	21	165.92	0	312.34
22350000	14857000	10269000	12686000	19100000	15805000	19118000	19434000	13756000	13042000	14123000	21961000	19655000	14390000	22874000	16262000	22355000	0	16880000	38114000	24128000	18675000	36381000	16268000	10025000	12997000	4774900	8746200	10049000	10838000	10462000	17065000	6660200	9471800	14904000	9785800	8793600	8690600				6	5	5	16.6	14.9	14.9	60.13	0	25.46
3732500	0	0	0	28620000	21774000	18961000	46283000	57362000	32050000	38292000	55316000	24542000	16692000	0	0	20315000	0	0	14306000	17776000	29249000	10108000	86460000	30151000	0	0	130160000	33333000	0	46422000	0	35304000	46453000	18372000	4279400	66203000	0				6	6	5	7.2	7.2	6.2	132.36	0	5.9556
16274000	17223000	30126000	17324000	19622000	14569000	29676000	36126000	23619000	17117000	16242000	17037000	19275000	20792000	24387000	38080000	21741000	15627000	38799000	18362000	31294000	17161000	21127000	25353000	26805000	22992000	21362000	10499000	13080000	24388000	21403000	24126000	12105000	22076000	14469000	22675000	16080000	24982000				5	5	5	6.5	6.5	6.5	135.25	0	103.17
19563000	27754000	23030000	23584000	26212000	25118000	26390000	32906000	34790000	27080000	17113000	37261000	29618000	33715000	23851000	30986000	29266000	14240000	17779000	17856000	23352000	15646000	31777000	24500000	34135000	23032000	27660000	25006000	22324000	19200000	40330000	26890000	20600000	16900000	25203000	17256000	22877000	12581000				12	12	12	9.1	9.1	9.1	254.41	0	51.501
2319100	974630	4328700	4481900	0	5506300	5508300	3345600	2470900	4158900	0	0	0	4526400	2409500	0	2230400	0	3669200	3020100	0	5736500	8144300	4040300	4148500	5373700	5771700	5465600	5961500	4467600	6370700	4739500	3405800	4880000	3872500	0	4852800	4151800				3	3	3	5.3	5.3	5.3	98.125	0.0026277	2.5735
18990000	10318000	11244000	13919000	7673200	3693500	5256100	13402000	6532300	0	4743800	5114900	0	9375200	23311000	9265600	0	0	2036400	908300	36702000	9692100	0	17317000	15398000	10235000	7956000	23594000	15996000	24483000	33434000	18021000	17246000	2413900	12460000	0	3975100	0				2	2	2	4.2	4.2	4.2	81.871	0.00034025	4.155
0	4830200	0	3429000	5099700	0	0	5741400	0	3299400	4059300	0	2552800	0	2028900	5069500	0	28828000	0	0	0	0	0	0	0	0	2719600	9157300	4010500	3989900	3864900	2351300	0	4018500	4351900	3577800	7496700	3255800				4	4	4	2.8	2.8	2.8	246.75	0	9.9735
53056000	52197000	17485000	0	0	20023000	0	68161000	28463000	9236200	36977000	0	33571000	43022000	36742000	37300000	41220000	0	35772000	0	65370000	38545000	34656000	37090000	65896000	59347000	81230000	48747000	37209000	57920000	57610000	46909000	30899000	8624300	0	7713200	28712000	9266900				2	2	2	10	10	10	26.899	0.00032982	3.7144
19882000	0	70883000	38040000	119060000	38004000	26482000	99392000	68433000	108670000	33859000	32932000	20407000	0	79905000	56549000	95605000	33837000	13707000	0	0	0	0	57473000	53639000	52804000	90422000	51666000	40042000	51565000	59772000	55013000	80861000	19459000	5829600	43295000	43938000	0				1	1	1	10.6	10.6	10.6	10.504	0.00061996	3.1095
103520000	106680000	114380000	21997000	43655000	67858000	50129000	59292000	60361000	132970000	132420000	52812000	81212000	196320000	111000000	103230000	56764000	79670000	67098000	76527000	85628000	56376000	10016000	59193000	75048000	85949000	97007000	72662000	81148000	78979000	120440000	62230000	107020000	33149000	73572000	48027000	79703000	104770000				2	2	2	11.2	11.2	11.2	22.202	0	188.85
112230000	166770000	162260000	153000000	98556000	148460000	220520000	130670000	85907000	148180000	120630000	116520000	57596000	218810000	23657000	142450000	18494000	33159000	141580000	126440000	112140000	244530000	18210000	82925000	116280000	192150000	79051000	67498000	110100000	145470000	156300000	49488000	107310000	141920000	161110000	163230000	140160000	149740000				8	8	8	24.4	24.4	24.4	52.545	0	131.09
8391500	0	2928000	1849400	12146000	17097000	12352000	3940400	0	4898400	0	13448000	7051000	0	12906000	21154000	0	0	0	0	0	4847800	11160000	0	22184000	10135000	0	7937500	5185000	8124200	0	1101600	7164600	0	9728100	15193000	13905000	4334800				1	1	1	8.8	8.8	8.8	42.001	0.0017889	2.7353
5318500	6494400	4223100	10469000	2425300	3596400	3387300	2884800	3498300	10378000	2262500	5847600	3881000	3279300	0	2496300	2490700	0	0	0	0	2300100	5171600	3782100	2270600	4471500	0	4841700	3614900	3131500	2973800	2707300	2413100	3325300	1313100	3807300	3048300	3509800				1	1	1	3.1	3.1	3.1	50.925	0.0030607	2.2284
0	15914000	10113000	6987900	5207700	0	2463800	9235600	14174000	8030800	9862700	8190200	7139700	2786200	11149000	0	0	0	0	6407100	0	0	0	9711900	13392000	18814000	16301000	16193000	16151000	13605000	11800000	21818000	9573500	2976500	9351700	0	11291000	4494000				2	2	2	7.3	7.3	7.3	41.111	0.00062657	3.2097
34215000	0	21383000	11814000	46186000	13056000	21743000	11137000	25958000	26857000	21766000	16230000	10701000	22331000	8471500	18928000	17134000	0	11129000	16105000	0	0	5266300	11642000	21467000	15742000	22467000	17638000	16238000	9366200	26519000	18575000	27756000	28502000	16067000	14784000	15212000	5702700				5	5	5	24.1	24.1	24.1	33.742	0.00034953	4.5666
1690400	0	2192400	1633900	1610400	0	0	2352900	0	1556500	0	0	0	0	0	1806900	728210	0	0	0	0	0	1827600	0	0	0	0	0	0	0	0	0	1024100	0	0	0	0	0				2	1	1	2.7	1.6	1.6	132.17	0.0082666	1.783
86801000	70950000	62301000	54897000	89861000	61991000	74750000	86805000	80855000	88737000	45161000	79042000	57817000	40365000	48093000	33972000	60938000	53770000	0	33620000	41086000	33555000	49708000	69498000	80022000	154120000	106560000	80682000	74393000	98769000	63387000	102700000	109230000	40900000	46765000	82190000	86201000	70341000				4	4	4	22.2	22.2	22.2	21.664	0	35.812
312720000	360790000	361280000	61901000	272170000	237360000	17573000	417280000	498640000	402110000	353740000	318300000	266070000	312930000	623100000	285350000	284920000	439680000	295960000	351700000	264610000	440800000	199920000	182960000	216350000	201360000	302960000	340030000	303890000	334170000	316660000	264000000	357600000	268310000	285080000	314780000	345760000	412110000				4	4	3	42.4	42.4	29.7	13.757	0	195.75
0	7069900	0	0	0	0	4222600	3306600	6200000	3332900	3552600	0	11547000	3860700	0	3648300	0	0	0	0	0	0	6083300	0	0	0	0	0	0	0	0	0	4108200	0	0	0	0	0				2	1	1	7	4.3	4.3	49.301	0.0092521	1.7414
4299400	0	3287700	6573000	2789900	0	0	4649400	0	2964100	4203800	0	4363700	0	0	3059600	0	0	0	0	0	0	8734000	0	0	0	0	0	0	0	0	0	4729500	4669200	2945400	0	0	0				1	1	1	9.7	9.7	9.7	19.752	0.0030778	2.2679
4078300	0	1679100	0	0	0	4472100	0	1465700	0	0	0	0	2276500	0	0	0	0	0	0	0	0	0	1070100	0	2532900	1757200	0	1912400	2345300	0	0	0	0	0	0	0	1373600				2	2	2	19.7	19.7	19.7	19.535	0.00034614	4.3988
2275400000	3189900000	2283200000	1785300000	3025200000	2383200000	2020000000	2278800000	2668900000	2082600000	2641900000	1758300000	1656700000	2653500000	2045600000	2081500000	2589900000	2377200000	2405600000	2515600000	2282200000	1936700000	2545900000	2527800000	2251700000	2404300000	2626500000	2082800000	2318300000	2501200000	2892600000	2871200000	2574300000	2371000000	2544200000	3448800000	2749000000	2449100000				14	14	12	66	66	59	39.488	0	323.31
43783000	23429000	28603000	0	42377000	38259000	0	36856000	45179000	35481000	7157800	15565000	0	28343000	30642000	15974000	36536000	0	0	2977800	46822000	0	0	29008000	20476000	31027000	29157000	18348000	27793000	33755000	29592000	43327000	29158000	22398000	37183000	0	20160000	11492000				2	2	2	20.2	20.2	20.2	12.774	0.003053	2.2239
98008000	109880000	40282000	86589000	84147000	83517000	82075000	99982000	135880000	88299000	87365000	65373000	112320000	61405000	113120000	50108000	80616000	32742000	169060000	63279000	18854000	63213000	90484000	104660000	58657000	124310000	38938000	89124000	74958000	98441000	82203000	161570000	74861000	56435000	56842000	74020000	54682000	30611000				28	23	23	20.7	18.3	18.3	275.66	0	89.737
4333800	2536100	0	3989100	0	2410900	6886400	3244200	3306300	3468300	0	0	1394200	2408100	0	0	0	0	2909700	2140700	5971400	0	0	0	850060	1062700	1244600	8033800	2614100	0	0	0	5451900	3774600	1185300	9727700	1690600	10990000				3	3	3	9.6	9.6	9.6	67.725	0	9.0369
20012000	9692000	33341000	22300000	35818000	8907200	12475000	22853000	7650200	42413000	30953000	23014000	15148000	27087000	18093000	29957000	17976000	83425000	7813300	20536000	38391000	0	19376000	40861000	55638000	22946000	14081000	29404000	29397000	51327000	17301000	31296000	26482000	57454000	24737000	33538000	20949000	28939000				4	4	4	22	22	22	26.034	0	9.2089
384880000	517610000	303820000	282880000	328810000	206640000	199190000	363900000	408820000	303100000	337260000	168000000	196880000	254470000	287260000	224870000	301260000	294640000	737310000	424830000	345580000	354390000	527280000	317150000	251090000	270630000	476880000	358420000	296970000	309880000	317500000	317500000	350900000	470340000	291450000	599510000	258600000	375790000				4	4	4	24.7	24.7	24.7	24.593	0	323.31
43424000	20120000	33690000	0	16214000	14663000	20266000	24241000	21115000	21828000	36667000	14000000	44299000	19952000	20182000	16029000	14104000	20828000	0	36732000	13996000	11634000	0	15264000	14628000	30801000	13594000	15736000	14873000	6460300	12668000	15043000	15876000	14284000	35392000	17440000	17188000	25973000				3	3	3	4.8	4.8	4.8	105.93	0	9.3211
117230000	141410000	235410000	447260000	155880000	204090000	243720000	119360000	101800000	80267000	161540000	192890000	220080000	186760000	178440000	401500000	153550000	0	195470000	94478000	229480000	208500000	108320000	133430000	92807000	78329000	115660000	91296000	227260000	238790000	259890000	91848000	117900000	177160000	123200000	125910000	169650000	218870000				4	4	4	40.3	40.3	40.3	29.763	0	248.52
101900000	225990000	144900000	26648000	133380000	78736000	76542000	134860000	174440000	129290000	164610000	73188000	99300000	17810000	138330000	67747000	109400000	85475000	64044000	57982000	140560000	59355000	92196000	127860000	110990000	123340000	144950000	96899000	93420000	118420000	136770000	170420000	119580000	45731000	167260000	61708000	102500000	232550000				7	7	6	32.1	32.1	30	38.169	0	16.43
8657500	6739600	7996800	6148400	6979700	11954000	11669000	5169100	7452000	5507000	5846100	13243000	10807000	9604800	8421400	11569000	15799000	12580000	7945300	8558200	15842000	11126000	10341000	3926700	4855400	5770800	3265700	6209600	4991300	0	4317300	5896100	8238700	13140000	7629400	10200000	5442100	7705900				4	4	4	16.4	16.4	16.4	54.366	0	22.155
0	0	0	0	0	0	0	0	0	0	0	4655700	0	0	0	0	0	0	0	0	0	0	0	1463400	0	7414000	0	0	1693100	3148800	0	0	0	0	0	0	0	0				2	2	2	3.1	3.1	3.1	108.94	0.0058309	1.9555
300260000	633790000	351290000	414600000	271870000	305230000	414790000	254270000	674190000	377060000	442280000	261530000	376370000	374660000	299260000	396390000	445490000	390270000	364820000	351500000	399990000	289900000	355360000	494500000	488780000	817010000	716080000	679880000	686350000	538020000	815410000	372980000	511380000	376670000	318370000	274160000	286820000	342160000				6	6	6	13.2	13.2	13.2	60.103	0	264.01
2360100	0	0	0	0	0	0	0	0	0	0	0	0	0	0	0	0	0	0	0	0	0	0	0	0	0	0	419630	0	0	0	0	0	0	0	0	0	0	+			2	1	1	7.8	4.3	4.3	38.925	1	-2
321150000	286520000	491190000	464640000	173580000	360440000	427980000	338280000	299830000	609640000	621670000	376190000	312560000	251140000	463400000	416170000	350270000	409520000	425730000	478660000	425350000	396220000	230030000	454120000	651820000	542730000	570670000	373760000	477900000	497160000	495940000	306360000	616970000	482850000	381580000	595580000	444280000	618710000				5	5	5	24.6	24.6	24.6	30.241	0	72.806
182010000	148930000	160150000	168420000	113870000	189810000	257670000	99276000	53154000	198420000	109770000	105620000	276560000	118310000	152490000	151220000	166250000	92734000	68011000	119450000	129930000	154860000	79134000	110300000	85164000	80640000	83489000	98107000	108820000	69261000	72578000	75046000	116890000	260270000	108850000	141290000	144070000	209350000				3	3	2	23.6	23.6	17	20.117	0	6.748
7180200	5980100	14977000	17538000	14162000	3946800	8899200	21638000	19128000	36238000	24213000	21254000	15316000	8060000	14232000	14068000	5991200	0	9972900	10436000	6865300	17830000	9856700	16167000	16304000	8148700	3402400	8081200	15477000	14357000	0	14703000	20420000	27790000	19387000	48638000	13307000	27061000				1	1	1	25	25	25	8.5435	0	181.59
0	0	0	0	0	2102600	0	0	0	0	0	0	2958100	0	0	0	958770	0	0	0	0	0	0	5922000	1770800	0	0	2356600	0	4777100	0	0	932640	0	0	1822000	313880	0				1	1	1	7.3	7.3	7.3	41.392	0	9.8505
46127000	22456000	28719000	23787000	13837000	29871000	15018000	20986000	19997000	11573000	11383000	19180000	14569000	7726900	7588200	18978000	7792200	0	17425000	11933000	4296200	6196400	18456000	8234300	7027800	10912000	4654400	8856000	12522000	13318000	6488900	14187000	16195000	10661000	13526000	8206500	16792000	26940000				1	1	1	13.5	13.5	13.5	10.058	0	14.951
368540000	340000000	313000000	480490000	469100000	353250000	348790000	367850000	256420000	373280000	281340000	370150000	342650000	381100000	363490000	305510000	336360000	352580000	316240000	391140000	285600000	312070000	338150000	205950000	196570000	206980000	182830000	231810000	264030000	217320000	231790000	208440000	276660000	354150000	324740000	438750000	323730000	345670000				27	27	27	40.3	40.3	40.3	145.83	0	318.76
27843000	19577000	14020000	29735000	28610000	26301000	25413000	19297000	26403000	25353000	34903000	29409000	37628000	45061000	25171000	56155000	52270000	68272000	15654000	43584000	0	36410000	20595000	28054000	26533000	31880000	20009000	24489000	16901000	29770000	33594000	23293000	27778000	23634000	38533000	25212000	31248000	27855000				6	6	6	10.3	10.3	10.3	85.746	0	172.71
5537400	5874400	3741900	11946000	4505700	0	5610200	5805000	3766700	4619500	0	0	3695400	0	8401500	0	12490000	0	11320000	8176500	7066000	5493100	8162300	2687300	4415000	3547900	2425600	0	1848500	5622100	1726900	4752400	5549100	7590900	2385800	0	3374800	5851800				2	2	2	10.8	10.8	10.8	24.09	0	15.441
115750000	81982000	196720000	75031000	352550000	257400000	97153000	127650000	71268000	174010000	165940000	221850000	159800000	230800000	141640000	255170000	380100000	175750000	141890000	101150000	111390000	102220000	72755000	333070000	327230000	299750000	500630000	364950000	293250000	200570000	310470000	179480000	290720000	112230000	229070000	181570000	261590000	106640000				4	4	4	21.2	21.2	21.2	31.635	0	34.327
16844000	14616000	19131000	23604000	42350000	36027000	12186000	10239000	32654000	39212000	36285000	48526000	15798000	23388000	48158000	34522000	23101000	27100000	54487000	39092000	28670000	15569000	30522000	40092000	32682000	29713000	34578000	36246000	33734000	23600000	21711000	44806000	29553000	14142000	12080000	8551000	18159000	9657800				8	8	8	16.8	16.8	16.8	89.864	0	18.747
249960000	241260000	244050000	361950000	107570000	193740000	218230000	381750000	227030000	275950000	287580000	116110000	170030000	208030000	160710000	170750000	162030000	352420000	199620000	267370000	262750000	357730000	155050000	204580000	174380000	174080000	193780000	183160000	200910000	172640000	139710000	166270000	239490000	172420000	178680000	138780000	166850000	190110000				3	3	3	23.8	23.8	23.8	22.875	0	37.725
687230000	556760000	575020000	642070000	515440000	688750000	591340000	509760000	483960000	602480000	597080000	673140000	654140000	695760000	587090000	581180000	571100000	488730000	488940000	532180000	526760000	656670000	541400000	446440000	456190000	459300000	359330000	497760000	488180000	412380000	456050000	380060000	555240000	555840000	542520000	583460000	587450000	585980000				53	53	53	39.4	39.4	39.4	244.5	0	323.31
35689000	31507000	25173000	0	34479000	14482000	32891000	43202000	16790000	53837000	24938000	20989000	34643000	20312000	13989000	16391000	14810000	0	0	19429000	21885000	33843000	36115000	27768000	46823000	43650000	28540000	17903000	21650000	22784000	32343000	27179000	19775000	13154000	25720000	50381000	21301000	20405000				3	3	3	33.1	33.1	33.1	20.214	0.00034141	4.1924
41246000	35182000	46425000	69886000	93973000	17670000	77078000	33145000	32570000	97977000	50251000	63375000	62045000	21390000	86959000	45411000	53821000	62564000	0	77057000	68989000	69748000	18864000	57910000	70812000	28645000	76889000	111780000	129740000	81684000	68449000	51632000	65224000	53659000	54344000	53720000	71948000	52085000				6	6	6	31.8	31.8	31.8	42.086	0	31.598
0	2758400	1128400	0	0	0	0	0	7025100	0	0	0	0	0	0	0	0	0	0	0	0	5018900	0	24014000	18697000	60127000	29445000	32368000	32468000	21673000	31035000	42450000	0	0	0	0	0	0	+			2	2	2	1.5	1.5	1.5	318.38	1	-2
26896000	26226000	28076000	37446000	33679000	10631000	11657000	22684000	18913000	22044000	15962000	13627000	13969000	18596000	17937000	20347000	15670000	0	40583000	21462000	11253000	13969000	19233000	30567000	25549000	18126000	24045000	32603000	18291000	33211000	13612000	0	27496000	25948000	21722000	35561000	17280000	16870000				9	9	9	12.4	12.4	12.4	149.01	0	36.596
2088100	12634000	0	4873100	4012500	4272400	13940000	0	13870000	22016000	0	18845000	0	9847200	1344000	0	0	0	7778600	3457800	0	8684900	11666000	15130000	13233000	4065400	9437800	14774000	11477000	11163000	15925000	21205000	0	5497500	0	4438900	0	0				2	2	2	7.4	7.4	7.4	39.641	0.00034282	4.2457
534410000	432210000	771850000	421320000	580940000	926640000	656860000	376080000	392150000	590890000	860540000	694340000	502220000	658240000	590240000	629670000	599920000	625890000	919570000	632230000	684730000	693010000	500160000	555210000	730680000	574070000	838420000	654300000	918930000	758630000	942480000	475960000	707150000	647700000	643130000	560520000	636730000	599660000				19	19	16	45.1	45.1	40.6	74.761	0	323.31
5643100	0	4351700	0	0	0	0	0	0	0	0	0	0	9598300	0	0	4872000	0	0	0	0	0	0	0	0	0	0	0	0	0	0	0	0	0	0	0	8440700	6894900	+			1	1	1	4.4	4.4	4.4	35.612	1	-2
5204500	5044900	4891700	0	12029000	0	6316400	5165400	2397200	5916200	5552000	0	0	0	4459700	8245400	0	0	4822600	0	4204300	8022700	0	0	0	0	3511600	4849100	2940300	5428500	4136600	0	0	2897900	4923900	4582400	0	4464200				2	2	2	7.4	7.4	7.4	39.134	0.00062208	3.1441
15086000	0	0	0	16017000	7503500	5590600	0	4893400	7374900	0	7170300	13658000	12577000	0	24780000	0	7183600	0	8345300	6557900	8926600	5482800	8608500	14993000	10030000	6482900	0	0	21968000	8149400	14181000	0	0	0	37587000	0	37957000				1	1	1	10.7	10.7	10.7	15.651	0.0028498	2.4283
42049000	37499000	33054000	62791000	34211000	37735000	14745000	35490000	40639000	32426000	15119000	17252000	45291000	24223000	31362000	41836000	48518000	0	54761000	30801000	22334000	29987000	49760000	44765000	33167000	52090000	48004000	31061000	34581000	41438000	39319000	37215000	19596000	36011000	18958000	24596000	23419000	34294000				4	4	4	21.6	21.6	21.6	35.611	0	53.447
26195000	0	22041000	18638000	0	13587000	0	15485000	0	0	38199000	11568000	0	26783000	10192000	12943000	0	0	0	0	0	0	0	20388000	25197000	14907000	15725000	16040000	14548000	0	14698000	0	0	11239000	0	0	21421000	0				1	1	1	5.9	5.9	5.9	22.941	0	6.497
45113000	53328000	31935000	56204000	45693000	58887000	72890000	47066000	80445000	45644000	34347000	36761000	26351000	73826000	59261000	60826000	36542000	38549000	69363000	86243000	85866000	68073000	40393000	39694000	28280000	50386000	51489000	91836000	116540000	70831000	38279000	34542000	76062000	49128000	66161000	98713000	34659000	37496000				3	1	1	16.6	6.1	6.1	30.85	0	224.21
3702100	4473100	4969200	12749000	5470100	11166000	5916800	4636400	6215600	4573000	4538200	9984700	7017500	6588500	5445100	8112700	6908700	0	5261700	0	4131700	0	0	12159000	16954000	28834000	9638300	4694800	2762600	2232800	5992900	3174200	4028700	7903700	1659500	8831600	2996900	3317800				2	2	2	6.7	6.7	6.7	54.812	0	28.138
421470000	348970000	289300000	211960000	279180000	287530000	241710000	343670000	278470000	264070000	295720000	394730000	314780000	318310000	164910000	180940000	239600000	220650000	222320000	294710000	217440000	197060000	278350000	184540000	174930000	337770000	171340000	178540000	235150000	196850000	284790000	190350000	283310000	180080000	353580000	165720000	287120000	252790000				12	11	11	32.6	30.4	30.4	46.659	0	323.31
5835600	17347000	10684000	3036300	21019000	0	18082000	4496800	3952800	0	15834000	16938000	18565000	22209000	13124000	0	41870000	0	0	0	0	0	61501000	0	0	0	0	0	0	0	0	0	0	15745000	12323000	20778000	0	7804800				2	2	2	13	13	13	33.814	0	17.047
64836000	53309000	58459000	41239000	69722000	44687000	67614000	55060000	48906000	40867000	8250900	66402000	52236000	54962000	66647000	62596000	60422000	45677000	75430000	88559000	37583000	86857000	27095000	66213000	72972000	67188000	48487000	52508000	49705000	38125000	44341000	83356000	37598000	68645000	54979000	86496000	66870000	32838000				8	8	4	27.2	27.2	14.2	60.692	0	196.88
0	5701400	6366500	0	13443000	14596000	12321000	0	0	7040800	9654600	21382000	9520300	12086000	12748000	16691000	11677000	23192000	14306000	20207000	13693000	22832000	6393700	9757800	12461000	8360200	5654500	8769600	9363400	7179400	7707900	0	8011200	3919000	9927800	0	11633000	4290700				3	3	3	13.4	13.4	13.4	56.776	0	35.827
1944700	1705500	2516400	1864400	0	3970800	0	2370400	1869600	3067300	0	341010	3909000	2430900	3048000	1901500	2477700	0	0	6212800	0	0	3213400	0	0	0	2900000	3571100	5847400	2699100	4838600	3102600	440630	0	2523800	2228300	1335200	470630				2	2	2	6.5	6.5	6.5	71.835	0.00035298	4.7421
41948000	25040000	50563000	41528000	61372000	99702000	50339000	30836000	13074000	29254000	33176000	35754000	103460000	61074000	59931000	74364000	93172000	68546000	63517000	136330000	70372000	153100000	88001000	73463000	72477000	65647000	50129000	59874000	86781000	78031000	166090000	105360000	29275000	41970000	31877000	60207000	30915000	60039000				2	2	2	21.3	21.3	21.3	26.131	0	166.74
14635000	0	0	0	0	0	0	0	0	0	0	0	0	0	0	0	0	0	0	0	0	0	0	0	0	0	0	0	0	0	0	0	0	0	0	0	0	0				1	1	1	19.3	19.3	19.3	19.468	0	6.3282
14207000	7644200	11776000	6973400	4963800	22071000	20380000	12753000	13336000	13821000	0	30278000	20072000	40757000	19762000	16810000	14967000	26387000	18911000	15324000	16727000	10786000	23522000	10545000	11128000	5705500	4775900	11644000	8354400	8615500	6236900	8450600	6308100	8409000	14357000	9530700	11300000	12137000				2	2	2	14.6	14.6	14.6	29.841	0	29.324
52255000	44600000	15523000	44198000	53068000	0	81828000	6291400	0	85868000	35697000	21201000	57836000	36486000	34254000	24698000	35566000	0	0	21020000	21987000	38766000	0	50390000	42581000	53964000	54590000	110160000	66966000	66035000	63573000	45525000	31983000	19834000	51019000	23314000	33886000	67955000				4	4	4	29.4	29.4	29.4	26.711	0	23.16
27239000	15078000	14613000	17335000	4551900	6274200	10730000	3184600	13922000	9885400	17334000	12091000	8191800	5430500	8339500	25396000	13597000	0	7556200	8470500	11231000	17687000	0	15959000	14523000	11854000	10085000	9525300	11862000	13398000	10608000	11476000	10377000	15530000	9479900	14966000	7945900	12161000				8	8	8	6.2	6.2	6.2	287.37	0	8.6669
0	6160200	12248000	0	5266700	9568400	6912000	0	10471000	5815700	7563500	0	3589600	11184000	3576900	0	9679900	8768500	4359000	9373100	5658700	9429700	8051900	4230400	7911300	7150800	16440000	3477300	3508300	6474000	13043000	12276000	5452700	0	0	3538800	6495700	0				4	4	4	4.8	4.8	4.8	214.8	0	38.486
35737000	37335000	89552000	0	21212000	13913000	13911000	42262000	29105000	38502000	48258000	50273000	0	15942000	34377000	35784000	44706000	41325000	0	27730000	0	57498000	0	53229000	35800000	36899000	235460000	45962000	47595000	34590000	55287000	36317000	0	11164000	36311000	19827000	23634000	21934000				1	1	1	3.3	3.3	3.3	37.432	0.0063042	1.8999
0	8034800	14968000	0	3585300	0	0	14463000	6991700	14808000	7478300	0	10603000	0	0	7615600	9727800	0	4027300	0	11070000	0	0	0	9157800	8467900	8821000	12360000	0	19135000	9174100	8133300	0	5560000	0	6441100	0	15102000				4	4	4	7.7	7.7	7.7	69.223	0.0023599	2.6631
34802000	28556000	32733000	14431000	25227000	19961000	15439000	37098000	13660000	20437000	43626000	50624000	15967000	20903000	36934000	27143000	48178000	74356000	29595000	55576000	77531000	31485000	26111000	27082000	42917000	46452000	49789000	27463000	45763000	20029000	86900000	23657000	31393000	21605000	11643000	15022000	19626000	29100000				6	6	5	32.6	32.6	28.9	31.196	0	76.479
0	20477000	22207000	6977500	0	34479000	0	0	18015000	0	0	6613300	0	17103000	12947000	15954000	8596100	0	29502000	18989000	0	0	7194700	16096000	29632000	0	25804000	28651000	19686000	26236000	11193000	31873000	14060000	0	0	0	12614000	0				2	2	1	11.2	11.2	5.6	36.636	0.00063654	3.3598
112150000	101630000	225300000	292920000	140670000	65268000	96545000	123670000	163720000	297470000	396070000	275700000	120360000	3698500	236100000	160020000	326080000	426320000	192320000	196320000	298180000	151690000	272420000	116120000	156360000	146960000	385130000	159140000	114210000	176580000	171670000	128140000	136300000	43376000	151240000	271740000	313340000	382770000				1	1	1	12.6	12.6	12.6	13.331	0	323.31
37072000	30945000	45660000	49986000	43325000	26910000	22260000	41221000	42845000	36814000	26988000	21080000	16731000	23394000	44579000	35260000	23921000	42939000	41826000	34572000	19190000	3168700	27595000	26118000	25741000	43326000	20316000	28236000	18468000	43475000	26780000	25810000	27354000	47552000	22452000	52781000	22368000	28670000				4	4	4	12.8	12.8	12.8	74.605	0	42.343
84002000	90132000	54726000	153850000	34482000	71542000	61724000	108470000	88567000	70379000	46918000	35048000	93638000	105180000	47199000	31445000	117710000	69199000	48666000	27992000	35625000	32102000	27585000	45333000	30211000	135490000	37373000	61193000	40571000	66036000	39291000	62553000	21666000	24508000	31988000	44381000	6693400	13618000				9	9	6	19.6	19.6	13.7	84.523	0	134.41
121520000	140760000	104080000	31937000	96306000	80030000	100420000	126760000	100800000	131740000	121200000	134170000	35715000	148780000	89042000	116800000	104320000	225290000	93726000	116830000	54309000	99938000	77464000	126140000	172730000	148630000	90083000	153970000	154290000	139800000	142580000	149320000	86874000	206420000	118890000	58427000	102840000	132250000				5	5	5	31.4	31.4	31.4	30.132	0	323.31
121060000	143580000	90674000	89693000	121670000	125240000	75339000	128740000	93768000	128490000	168970000	114190000	156220000	80478000	108100000	155170000	107940000	113770000	184290000	132900000	112310000	102470000	97848000	142070000	220390000	145350000	130100000	113500000	117450000	140210000	131480000	129080000	54617000	112330000	120140000	135750000	80183000	145210000				5	5	5	24	24	24	37.919	0	248.37
32606000	113530000	137830000	23851000	75341000	99776000	180230000	46334000	88757000	83483000	68812000	45404000	79401000	63669000	80091000	90279000	68739000	70238000	84781000	82269000	80474000	158140000	58298000	174910000	83685000	47422000	135560000	87738000	93570000	73427000	71146000	62943000	103860000	71408000	48580000	60509000	46680000	53033000				5	5	5	14.5	14.5	14.5	35.647	0	83.428
29890000	26651000	14231000	14943000	7872300	8462500	19758000	26220000	8073200	13065000	25178000	5265100	8161300	35706000	22823000	13135000	25172000	13725000	30222000	20946000	20277000	61410000	22812000	16914000	24890000	31896000	26413000	16554000	19426000	16499000	38907000	16226000	16001000	9692900	34403000	45084000	37790000	51846000				2	2	2	11.5	11.5	11.5	39.055	0	14.021
594290000	322760000	386510000	253930000	68653000	930640000	670400000	276030000	343340000	658140000	924640000	745300000	577890000	991420000	568760000	67073000	40310000	499440000	0	947310000	631710000	565780000	507130000	47403000	277150000	415750000	178480000	1177900000	699600000	398170000	696320000	173560000	821790000	937950000	835700000	431810000	531590000	757950000				3	3	3	10.1	10.1	10.1	56.958	0	11.422
14891000	0	24676000	34977000	37339000	2468900	37900000	12190000	15363000	35640000	78841000	49192000	18704000	0	25013000	45282000	29396000	76634000	88278000	0	0	34528000	20473000	46126000	60420000	20706000	23197000	27820000	32236000	60525000	0	24659000	68998000	86742000	51116000	41170000	28910000	48465000				1	1	1	13	13	13	12.993	0.0026019	2.5237
30386000	53054000	56084000	10504000	8840400	87832000	33888000	26192000	43366000	78344000	61070000	32031000	8395800	45315000	25956000	29115000	14141000	53111000	41307000	24079000	4137800	29396000	10170000	43954000	37716000	36665000	56174000	42677000	48389000	32724000	62749000	16514000	33143000	39292000	34189000	28831000	27331000	28772000				4	4	4	14.6	14.6	14.6	51.824	0	162.06
33849000	92260000	114710000	68549000	62850000	32265000	117380000	124270000	94026000	90450000	83616000	27446000	110220000	73102000	0	53879000	41753000	0	55665000	23608000	69746000	15539000	39925000	87893000	83994000	83523000	108900000	92581000	92502000	175710000	80290000	182570000	119390000	31280000	244970000	50486000	85168000	80292000				2	1	1	9.9	5.5	5.5	20.189	0.0080186	1.7894
15501000	36142000	12598000	18416000	16973000	16591000	21023000	10331000	28566000	18897000	18160000	14776000	27256000	18408000	30586000	18285000	0	40221000	0	0	16727000	22612000	7981000	19613000	28604000	24249000	23333000	24028000	39105000	22146000	27233000	28047000	9173200	13308000	17766000	0	31073000	12195000				2	2	2	13	13	13	34.624	0	11.739
49579000	39142000	29715000	66773000	47984000	56350000	53595000	27358000	37784000	49323000	44103000	31623000	50438000	73555000	29236000	42255000	47415000	46010000	15003000	77420000	45298000	60185000	39690000	30308000	46585000	66289000	41655000	33715000	36521000	43039000	38415000	43508000	37387000	39353000	47846000	37976000	37622000	68576000				9	9	8	21.3	21.3	19.8	75.022	0	117.26
0	0	0	4918300	13901000	0	0	0	0	0	0	0	0	0	0	0	0	0	0	0	0	0	0	0	0	0	0	0	0	0	0	0	0	0	2285300	0	0	0				2	2	2	7.7	7.7	7.7	53.059	0.0030873	2.2911
0	4173100	0	8196100	0	0	0	6939000	5787000	0	0	0	0	0	0	0	0	0	5012900	0	0	0	0	0	0	0	0	0	0	3672100	0	6771800	3017400	0	5029500	1822900	0	0				2	2	2	4.8	4.8	4.8	112.13	0.00034211	4.2064
13993000	0	7085700	3897100	12866000	0	9330100	9243000	0	0	18360000	3918100	7444400	0	0	7721500	0	0	6453300	8613700	0	0	0	6585600	10870000	7139200	10906000	6531100	9642800	0	10792000	0	4719800	0	7019500	5510800	4635300	10862000				4	3	3	18.3	15.5	15.5	46.877	0	7.6438
6480500	0	13200000	6475300	11904000	7879400	5318600	21344000	0	8118600	10264000	11915000	6418400	7417500	10957000	15693000	10911000	18713000	0	13048000	8681800	0	0	8694400	10599000	9384600	8460600	7383900	7751200	7824700	6212500	0	19813000	15900000	13754000	25605000	8649500	0				1	1	1	5.9	5.9	5.9	23.693	0.0025929	2.507
647690	5619500	1002300	0	0	1486600	0	918880	14336000	5277000	2930900	5295800	6306800	3865100	7396400	0	3835200	0	0	291430	0	0	2430500	2493700	2187800	0	0	0	0	4094700	0	0	0	0	0	0	0	0				1	1	1	7.1	7.1	7.1	15.113	0.0053562	2.0164
145560000	203010000	370480000	181730000	206200000	287670000	271510000	221090000	195540000	310440000	371810000	283950000	257070000	230810000	237470000	291080000	198210000	596470000	294050000	345770000	284840000	329180000	224140000	237880000	351800000	251580000	330210000	264370000	254980000	243040000	318280000	210090000	241380000	286460000	215280000	242700000	236330000	283770000				13	13	13	33.7	33.7	33.7	67.454	0	323.31
0	1901600	1668800	1420500	1829300	0	3033100	2553400	827710	1385500	2196400	1444000	0	1333200	2982600	2996000	0	0	673490	1972900	0	4350700	0	5060400	1667100	0	0	0	0	0	2321100	3263900	2052800	7444200	2041200	4797700	184730	1998100				5	5	5	8.9	8.9	8.9	108.19	0	6.8202
151720000	65847000	118900000	57628000	111680000	105100000	214390000	164880000	118700000	114500000	198620000	191800000	107610000	160600000	105400000	160400000	167230000	191430000	227210000	188180000	234080000	248480000	108960000	120890000	176780000	139270000	161800000	108620000	131290000	164180000	210400000	156010000	202260000	144740000	172810000	198260000	153000000	162880000				13	13	13	15.1	15.1	15.1	137.61	0	167.72
16587000	31376000	19276000	29106000	30462000	23633000	19932000	37227000	26658000	18547000	29618000	21963000	18119000	42763000	41539000	45741000	39405000	46843000	22441000	38693000	9377100	32655000	19582000	22198000	21368000	32980000	16432000	24530000	25964000	28929000	51526000	26404000	19033000	42297000	17779000	35488000	23835000	34099000				7	7	3	16.7	16.7	8	82.097	0	76.58
0	3369500	0	0	0	0	0	2947700	0	0	0	0	0	0	0	0	0	0	0	0	0	0	0	0	0	0	0	0	0	0	0	0	0	0	0	0	0	3763600				5	1	1	16.3	3.7	3.7	57.583	0.0015323	2.9899
183990000	135630000	144400000	204930000	145050000	166230000	128870000	186910000	160270000	103060000	143090000	199960000	114570000	322110000	163650000	139460000	147470000	0	130810000	147370000	131690000	146350000	319720000	187870000	142680000	275390000	209690000	195760000	194130000	179950000	207080000	262400000	147110000	105790000	109260000	117920000	161390000	115200000				5	5	5	12	12	12	74.777	0	13.698
53849000	36173000	46935000	44784000	34511000	44077000	49391000	42562000	34741000	38581000	42025000	39769000	19591000	35866000	31567000	38693000	24700000	37385000	40036000	38741000	51348000	34057000	34147000	39668000	43169000	70932000	57780000	74587000	74225000	41102000	43660000	37234000	65135000	34954000	34520000	36773000	49054000	29855000				5	5	5	18.2	18.2	18.2	54.862	0	63.17
84456000	120470000	98339000	98992000	129080000	93233000	121920000	85575000	75840000	123470000	130210000	199510000	76899000	181510000	78786000	84978000	73177000	103230000	43928000	106800000	263980000	155300000	167820000	133680000	65589000	114850000	78109000	90430000	79078000	95372000	113460000	44795000	93521000	141870000	74995000	49160000	64805000	74040000				5	5	4	28.3	28.3	24.8	37.839	0	169.25
20291000	15979000	16854000	35568000	8582800	20004000	25778000	10415000	9379000	14656000	12783000	21626000	21961000	17799000	3719700	0	9789700	0	19172000	16202000	12369000	13100000	12946000	15717000	16465000	16469000	20333000	17544000	0	12751000	7700300	13673000	12566000	20173000	17375000	13818000	13806000	17470000				4	4	4	6.8	6.8	6.8	102.43	0	62.61
0	14255000	3539400	0	13310000	4681600	11689000	5054900	23696000	15222000	3965100	0	11515000	15550000	8211600	8403400	30642000	4039600	0	6003600	0	0	13452000	4314600	9209200	0	8550200	12985000	10438000	11582000	9254300	9647900	15793000	0	9398300	10522000	12934000	0				6	6	6	6	6	6	162.71	0.00063452	3.3253
4250600	4899900	0	4236200	0	7462600	9114200	3810800	0	5304500	0	7783700	8373000	9362000	0	0	1622100	0	0	0	0	0	0	4115600	0	0	3480500	0	0	0	0	0	0	6302200	0	5576900	6552600	9381900				4	4	3	4.4	4.4	2.8	179.24	0	98.902
8346400	4633500	2624200	4935100	5659600	2334900	2822000	1793200	2610100	3940400	2645500	3089300	3311900	6376700	0	4379500	8479800	1703200	10497000	5628900	0	0	4067700	5983300	6088000	4986700	4499100	6605100	3455500	3731000	3057600	3728200	5332600	2577600	3039200	3747100	6259600	3378000				6	6	6	4.2	4.2	4.2	339.59	0	9.6587
467890000	522410000	599640000	400430000	594390000	509980000	368500000	419850000	445450000	531690000	448830000	521460000	353810000	474990000	500420000	523710000	506270000	1092600000	724700000	658570000	800950000	905630000	487530000	462760000	691230000	469410000	744610000	568550000	639150000	587980000	720970000	421830000	826930000	600460000	580820000	702620000	847340000	1019500000				15	15	2	33.8	33.8	4.3	73.46	0	323.31
0	0	1277000	0	3576300	0	0	0	0	0	0	0	0	0	0	0	0	0	0	0	0	2605900	0	0	0	0	0	0	0	0	0	0	2248200	0	875330	0	834270	0				15	2	2	38.6	5.7	5.7	65.459	0.0003413	4.1877
3676800	0	5606300	1511200	0	3256100	0	3224400	1128800	3773300	0	935300	0	2101500	0	705690	1913400	0	0	0	0	0	1379500	0	0	0	0	1874300	16188000	0	3342200	0	2073800	3897400	1505100	2657400	1771000	1354500				1	1	1	2.4	2.4	2.4	61.57	0.0038419	2.1594
21797000	17017000	15657000	0	21608000	15794000	10530000	20957000	11765000	10193000	26807000	18335000	11408000	6440400	12771000	0	21272000	12219000	22920000	0	0	13841000	12062000	14002000	21380000	18977000	18979000	0	0	6429400	18976000	0	10169000	0	13104000	19590000	9511900	0				4	4	4	15.3	15.3	15.3	71.478	0	26.081
7615300	10074000	9066300	10679000	0	4270500	7603600	5542500	3765500	8957600	8322600	6693300	0	0	9439900	18018000	5669000	0	25507000	13617000	0	16830000	10032000	8535800	10343000	7305300	7164500	6087500	6703200	6510500	9877700	8897000	4677900	6101200	5840600	9369600	7821800	7894600				1	1	1	1.4	1.4	1.4	140.02	0.0006435	3.4584
6155000	10198000	13456000	6801800	5155500	14158000	22044000	5575900	5520500	5537800	10670000	2779700	2690700	56972000	6144700	0	0	10361000	9818500	14806000	5766600	7274800	3994100	17041000	11034000	11686000	20411000	11171000	15794000	13964000	21365000	9188300	12986000	4279700	5816200	13635000	5782200	7915000				4	4	4	5.4	5.4	5.4	98.515	0	14.008
138410000	118710000	118270000	148620000	140290000	137670000	168070000	124840000	183320000	111740000	163710000	123500000	156290000	134180000	121070000	154230000	120080000	209010000	94967000	124390000	110590000	185910000	143800000	109350000	119880000	150400000	163880000	129500000	143910000	118390000	228540000	158430000	108070000	106710000	140580000	128460000	101870000	121340000				15	10	1	25.6	18	1.4	103.96	0	242.22
0	0	0	0	43110000	33526000	43674000	0	0	0	0	31204000	47277000	39166000	0	0	72394000	0	0	0	0	0	0	28223000	35817000	40506000	35429000	21986000	0	0	0	0	0	0	22809000	0	72789000	0	+			15	1	1	25.6	1.5	1.5	104.09	1	-2
44192000	41312000	46324000	33888000	19593000	46907000	20716000	42085000	33797000	38099000	20560000	66443000	25151000	45589000	25793000	34853000	41763000	55972000	31196000	12238000	21303000	13388000	42762000	23200000	24657000	21784000	14409000	23526000	17238000	7750400	14991000	22326000	38570000	53842000	23057000	23072000	24666000	22927000				6	6	6	10.6	10.6	10.6	105.75	0	135.77
4322500	0	5036100	0	0	0	0	5946800	2552400	0	5143400	4656900	4060600	0	4076700	4714500	4149800	5303600	4773900	4015400	4109500	0	9570700	7308500	7211300	8846300	5578000	5600800	7077400	0	0	0	5513100	0	0	0	8876300	0				2	2	2	3.7	3.7	3.7	108.64	0.0015235	2.9451
23470000	19197000	25888000	15725000	7390600	17546000	19932000	21089000	16345000	23813000	15711000	5518100	8878400	5660900	9308500	12919000	7082600	0	0	0	16560000	17535000	11276000	10430000	14231000	19080000	26071000	25982000	11446000	11991000	20188000	6437600	15193000	22916000	11412000	10122000	25764000	28109000				2	2	2	13.1	13.1	13.1	22.329	0	226.94
16035000	24515000	24627000	42622000	66129000	16609000	53006000	11360000	19496000	16068000	20221000	19441000	651660	22764000	16217000	12820000	10386000	18669000	22163000	20578000	0	38318000	24659000	18958000	21721000	10659000	23609000	16281000	25149000	17227000	23119000	19878000	21665000	11452000	25598000	34088000	20919000	16393000				5	5	5	9	9	9	123.64	0	6.7205
14452000	20391000	19987000	14192000	6485900	10558000	13219000	7851400	0	15044000	35190000	21454000	10278000	3895000	10394000	21947000	5737100	5409000	0	6465300	0	7916900	8041500	14363000	11725000	8758200	10380000	8824700	12130000	48615000	26373000	0	9928200	15556000	9474700	8674300	11540000	14478000				5	5	5	12	12	12	86.401	0	7.2053
42098000	0	0	83094000	56858000	52105000	35375000	56072000	53395000	67663000	132950000	165360000	69275000	57248000	74970000	53168000	30350000	0	63655000	49328000	119830000	0	69756000	63239000	73461000	45473000	61500000	40584000	32284000	61213000	62016000	80422000	67240000	47216000	80216000	0	42197000	0				2	2	1	9.4	9.4	5.7	37.206	0.0023669	2.6779
5018200	3393500	4867000	6309500	0	0	0	4354500	8236900	5806500	0	7202300	3269700	0	0	0	5241400	0	0	0	2775800	3896100	4849400	5948000	5292400	5765800	5995400	3777400	6891200	3787400	4098100	5308300	3834100	8236100	4103700	7122300	4420700	2830600				5	5	5	7.8	7.8	7.8	133.27	0	20.326
17977000	14083000	0	0	27946000	11676000	20581000	17272000	14716000	9785600	10314000	11516000	13331000	8497200	4952800	7589500	7307400	0	0	11337000	29210000	10669000	4490000	11456000	11232000	23075000	16452000	13879000	14961000	27138000	15603000	11642000	13024000	0	11665000	0	0	0				3	3	3	2.9	2.9	2.9	150.25	0.00035112	4.6406
0	0	0	0	0	0	0	0	0	0	0	0	0	0	0	0	710740	0	0	0	4039800	6609000	0	8124200	0	0	5382800	5415100	4515300	6196700	0	4571100	974430	0	0	0	0	0				1	1	1	12.8	12.8	12.8	13.157	0.009226	1.7346
20461000	0	18188000	0	0	29140000	14626000	0	0	19231000	0	36767000	0	40813000	25784000	32700000	0	0	16974000	11370000	0	0	27251000	7991500	7626600	5961000	3881600	8484600	4294700	3816100	4694000	5454400	14348000	25135000	11492000	25359000	15626000	25624000				1	1	1	14.5	14.5	14.5	14.044	0	6.0875
0	12700000	29557000	0	0	0	21938000	15563000	0	10672000	7158000	10952000	1726100	36624000	0	17340000	0	29802000	0	30860000	16558000	0	0	15196000	28437000	24705000	7272300	11962000	9890300	21345000	31845000	32281000	14724000	0	14067000	0	0	0				1	1	1	28.6	28.6	28.6	9.2787	0.0038377	2.1497
40602000	41857000	70634000	24230000	0	0	31602000	34971000	36279000	59548000	94097000	13696000	26127000	0	45150000	43161000	30525000	41975000	45867000	44203000	53953000	46058000	0	39761000	121370000	47012000	38754000	39456000	41531000	68409000	53363000	40903000	44414000	70278000	33472000	31701000	56062000	40853000				2	2	2	30	30	30	14.026	0	103.11
23705000	65896000	62056000	34857000	35571000	24775000	24447000	55487000	41362000	41559000	69190000	69944000	27409000	36423000	29473000	42973000	89089000	111390000	71456000	134580000	102830000	154560000	90819000	29024000	41714000	32959000	44500000	28317000	29283000	33499000	55612000	24586000	27149000	703970	60858000	59071000	71888000	31625000				1	1	1	12.3	12.3	12.3	18.479	0	82.868
0	0	0	0	0	0	0	0	0	0	0	0	0	0	0	0	0	0	0	2908600	0	0	0	3308600	3639800	0	0	5309000	0	3666300	2173800	0	0	0	0	0	0	0				1	1	1	6.7	6.7	6.7	43.621	0.0028547	2.4495
2520500	2078800	2169200	2441500	0	2109100	2382100	2226900	3441400	2625800	1509100	4590100	2422200	1214100	0	1269200	1095800	0	12362000	0	2129800	0	3781300	0	0	0	0	0	1514000	0	0	0	3020500	4612600	2247200	4647200	1806300	3162600				2	2	2	2.7	2.7	2.7	100.82	0	42.612
33529000	22012000	49230000	49093000	43549000	29711000	25251000	21901000	67618000	29447000	40092000	15955000	30404000	22741000	14637000	43795000	0	39115000	69637000	34385000	45675000	30569000	59087000	23881000	32418000	23765000	25383000	27317000	34773000	50531000	25592000	22994000	34402000	19986000	24895000	26309000	36132000	0				5	5	5	10	10	10	83.353	0	13.54
49088000	48457000	47403000	46388000	30637000	53755000	35747000	35153000	43900000	37578000	41160000	46237000	30587000	45930000	45299000	28456000	42302000	251860000	11803000	21381000	37159000	22581000	22937000	27864000	28262000	28186000	49765000	40816000	39075000	27922000	43609000	20625000	33981000	45842000	29769000	38047000	43786000	32319000				7	7	7	20.1	20.1	20.1	51.466	0	72.045
7591200	7146400	8785300	12339000	8842400	7455100	7155900	8131600	7499000	7375500	6809000	5789700	7218500	11114000	10303000	8003000	9322600	0	11430000	10231000	0	17474000	13839000	5127200	14504000	5063900	3234200	14359000	9471700	7730400	8818500	2908500	5658300	0	7226000	6819300	5670000	10260000				5	5	5	5.2	5.2	5.2	208.44	0.00034072	4.1773
0	3541900	0	3575500	0	2466100	0	0	0	0	0	4502400	3280000	4120700	6753100	0	5456500	7589000	2967100	0	0	5056200	0	0	0	0	0	0	4443100	0	0	0	0	0	2150400	0	3127100	0				1	1	1	3.8	3.8	3.8	51.439	0.0031073	2.3562
1679500	1452400	2298600	3064000	0	949450	0	1078900	1442800	0	1262200	0	0	0	1129200	1666600	0	0	0	0	0	0	1409200	0	0	1510500	1089000	0	0	0	1298800	1123400	1659700	1804300	1660300	2807100	1902200	1476700				2	2	2	14.9	14.9	14.9	35.958	0.001791	2.748
0	0	3824900	4702500	0	0	0	5415000	9563800	7577000	7401300	12124000	4229300	12273000	5671300	0	0	0	11896000	0	0	0	0	0	6453800	0	11751000	5219000	8914400	8196200	7870800	7302400	8432700	2334000	3055500	3229200	2675200	0				2	2	2	9.1	9.1	9.1	59.031	0.0023676	2.6781
0	0	0	0	0	1344700	1663300	0	0	0	0	0	0	0	1936400	0	3181300	0	0	920320	0	0	1873900	0	0	0	0	0	0	0	0	0	0	0	0	0	0	0				1	1	1	7.1	7.1	7.1	39.791	0	5.7416
27584000	46862000	19657000	22812000	33765000	0	39430000	24260000	28235000	39383000	25405000	12552000	21256000	19852000	23651000	46368000	22662000	0	17600000	14279000	27328000	28239000	20268000	18636000	16460000	20867000	17287000	47852000	11992000	15941000	18122000	15824000	18233000	21735000	20859000	20438000	18597000	63488000				3	3	3	38.2	38.2	38.2	14.874	0	5.8394
107100000	98079000	172390000	24341000	38687000	13364000	52407000	70834000	0	210370000	257530000	35974000	0	8929700	60251000	72666000	50586000	44631000	35952000	52125000	69555000	0	0	88123000	160440000	91944000	152220000	127870000	69936000	167230000	113100000	88588000	143370000	61573000	210640000	0	138740000	0				2	2	2	13	13	13	40.75	0.0053548	2.0162
4705200	6179800	6739400	8717300	5573400	13189000	17687000	0	5101300	7598200	11538000	18448000	18311000	4003300	10886000	9863500	17750000	0	9376600	8047700	10198000	0	10544000	7043800	0	8892100	5926100	3003700	8537500	0	0	12515000	8820900	10721000	18321000	9973700	0	5014500				3	3	3	8.4	8.4	8.4	63.083	0.0085052	1.7596
36783000	31189000	31893000	38490000	31601000	40456000	20135000	20338000	29923000	28180000	56260000	79439000	24076000	41059000	30123000	36585000	62575000	108460000	38013000	29625000	34551000	30971000	35177000	19852000	21492000	21701000	13462000	22534000	28279000	35887000	30995000	27269000	31017000	25752000	25925000	30895000	47752000	23972000				4	4	3	15.4	15.4	13.3	52.054	0	175.2
37479000	81623000	84299000	85183000	67168000	75153000	187460000	126230000	118350000	35883000	54251000	131230000	89693000	123330000	89708000	46435000	68455000	100040000	84383000	12862000	21532000	72263000	40679000	121690000	45569000	85364000	151240000	104220000	114890000	63911000	140680000	93422000	133600000	57806000	64686000	96034000	94129000	177500000				4	4	4	18.6	18.6	18.6	27.547	0	38.391
7863700	5981300	2909200	13154000	6410100	0	5154400	8553300	7195400	4547100	1985300	8689200	11029000	0	8146600	0	2663100	0	5053600	2230200	2567600	0	4979500	2013800	0	4853200	3171200	0	1769800	4479300	3370800	2679000	0	3255300	2968900	6337400	2640300	3986600				4	3	3	13.5	11.2	11.2	69.5	0	76.765
11322000	0	11706000	18950000	13363000	12003000	24239000	13116000	10787000	12164000	11589000	11914000	14605000	17399000	0	9338500	13796000	21203000	14476000	9477300	3572100	15994000	12212000	7153700	6864900	7917200	11163000	26764000	15291000	17628000	4978300	15804000	9992100	18647000	11020000	13564000	12314000	12057000				6	6	6	11.1	11.1	11.1	77.959	0	12.57
0	1848200	2980600	1822600	1510100	5837600	4891800	2297300	2489400	4081700	3229800	0	0	0	0	0	5741700	0	4710400	2348400	0	0	0	0	0	0	0	0	0	4014100	0	4135600	0	3070900	0	4938400	3172000	2535200				1	1	1	4.6	4.6	4.6	61.438	0.00034352	4.2797
114800000	71177000	57659000	53944000	47179000	98086000	53280000	58626000	44697000	57329000	28410000	118180000	36680000	56977000	31981000	41533000	9246800	0	54627000	83002000	35266000	80194000	53118000	30395000	23126000	52123000	20860000	45516000	59357000	28590000	82406000	42753000	41058000	37102000	43987000	40415000	46507000	40302000				4	4	4	29.9	29.9	29.9	24.737	0	18.53
291580000	374090000	288770000	436870000	271970000	390850000	289310000	300180000	353280000	319680000	237490000	339380000	254590000	312810000	242510000	352560000	278860000	212060000	316470000	265850000	289920000	285920000	296530000	277930000	323790000	325240000	397780000	272920000	303910000	254440000	344410000	394900000	267820000	431750000	248530000	336060000	281910000	343800000				23	23	22	34	34	33	119.52	0	323.31
11814000	17020000	21622000	14570000	14882000	54327000	18971000	19292000	12884000	13290000	0	13752000	22532000	17054000	16146000	10944000	17636000	8476400	0	13492000	13759000	11107000	0	30124000	18439000	10605000	8374300	11867000	19337000	15486000	9809000	16258000	12931000	41311000	20419000	10658000	14665000	16247000				3	3	3	10.5	10.5	10.5	57.818	0.00062775	3.2252
2592200	1756600	0	2290600	0	1910900	0	0	6414400	0	0	2588800	3141700	3469400	0	0	2255500	0	2650500	0	2195300	0	3308400	2652100	0	0	0	1708000	0	0	0	1345700	924950	0	0	0	1064200	1103300				1	1	1	10.6	10.6	10.6	21.877	0.0017852	2.7201
0	0	0	0	0	0	0	0	0	0	0	0	0	0	0	0	0	0	0	0	0	0	0	0	0	0	0	0	1696900	0	0	0	0	0	0	0	0	0	+			2	1	1	7	5.5	5.5	59.851	1	-2
0	5507900	0	0	3477200	2144100	0	5297500	4953300	5532300	1908600	0	1468600	0	1993000	1465000	2364000	2532100	2368100	0	0	1655100	3335600	1747900	5168000	7268700	1969200	0	4108300	3055900	5455000	2049200	1691200	5478000	4337500	3853000	0	6266500				1	1	1	3.2	3.2	3.2	37.646	0.0026193	2.566
116390000	254550000	425470	82432000	157450000	675420000	474140000	162740000	93286000	180120000	342280000	345040000	337220000	182740000	579320000	428370000	550980000	0	279580000	675550000	460660000	619010000	488090000	587480000	522460000	355570000	472030000	394820000	449500000	605960000	540430000	601070000	281600000	336070000	189380000	284410000	612830000	799300000				2	2	2	3.4	3.4	3.4	105.81	0.0062877	1.8833
0	33550000	0	0	0	0	0	42448000	37349000	5213500	0	0	0	52459000	40026000	45187000	33029000	0	0	34661000	37980000	33502000	0	0	53597000	47531000	3988600	33826000	28785000	41825000	46315000	40637000	27780000	0	0	19867000	0	23210000				2	2	2	8.3	8.3	8.3	32.339	0.00064725	3.5104
8931300	10716000	7812500	8203000	4383700	0	6438100	3362300	9627100	7465100	11060000	6156700	3753100	4128700	4364700	2010000	0	0	9382400	0	0	0	8836200	8441900	8093400	8892700	5364000	6544400	5261300	9342600	7505800	10514000	12959000	8284000	3427800	2702400	3253900	2879100				1	1	1	3.7	3.7	3.7	30.288	0.00035575	4.8913
14018000	0	6675100	851530	0	5962300	0	7869900	0	0	0	9439800	0	0	0	0	0	0	0	0	0	0	0	8599900	7531200	9726900	6362800	8919300	8334000	8073200	5930000	10335000	0	0	0	0	1084200	0				2	2	2	6.7	6.7	6.7	63.523	0.0023426	2.5989
13641000	8182800	7143600	0	5773000	8250800	0	5796500	6934700	3470400	0	0	0	0	10628000	0	0	0	0	0	4455700	0	12127000	7475700	9252000	1792300	9293600	0	2155600	8800400	8643500	8873500	10089000	11667000	9005400	5437400	6563400	8861700				3	3	3	19.5	19.5	19.5	27.687	0	48.167
14687000	26680000	21387000	25353000	14267000	19953000	13940000	26214000	17219000	30888000	23245000	17686000	23156000	17566000	17475000	5498800	13217000	9368100	12662000	16571000	27853000	17238000	22228000	13898000	21637000	18905000	10284000	22084000	21651000	14377000	15856000	18838000	16106000	19837000	14091000	19291000	8602800	12171000				6	6	6	9.6	9.6	9.6	119.75	0	188.12
6431100	0	8696200	4601000	1323400	6581300	11301000	1120500	0	6470100	8110400	9779300	5078800	12870000	0	0	0	0	0	0	0	0	0	7030700	15586000	8298200	10510000	11604000	10579000	11984000	4755800	0	13191000	4616500	12846000	4911100	2992000	4871700				4	4	4	4.9	4.9	4.9	133.63	0.00035174	4.6808
9056000	0	17152000	7251600	0	0	0	4125600	9351500	6997300	0	1981000	4414800	1511600	4380200	2866000	3928000	0	0	4448100	2183700	0	8933200	2296600	2537400	1258800	0	0	2389100	2851100	0	0	5074200	0	1801400	2579200	5782000	2043400				2	2	2	3.6	3.6	3.6	126.16	0.0025959	2.5103
6816700	44895000	37749000	10428000	25561000	16509000	20461000	36379000	41856000	33202000	35411000	7923200	3560900	58832000	17817000	15591000	11801000	26747000	39472000	79621000	26889000	7427500	92512000	21115000	45837000	47919000	52408000	41960000	44621000	35378000	75587000	36933000	32575000	37884000	54927000	8028400	58489000	34965000				3	3	3	28.3	28.3	28.3	14.279	0	6.6687
36163000	40485000	35546000	13670000	31051000	59249000	25854000	17348000	10342000	24698000	30514000	21524000	20268000	38431000	34398000	25267000	42212000	37261000	21857000	30856000	42158000	45607000	0	15597000	19874000	19441000	10524000	16181000	25687000	20477000	15841000	18808000	19642000	50748000	19361000	18976000	25293000	20168000				4	4	3	8.9	8.9	6.4	80.419	0.0003639	5.3385
167400000	193140000	430480000	598960000	209150000	145230000	206810000	269770000	423610000	380350000	474290000	158520000	114460000	155900000	331820000	425500000	136810000	69345000	685130000	194290000	264410000	123030000	227650000	401900000	461160000	390620000	446130000	334870000	293620000	457010000	227790000	438770000	359480000	654410000	205800000	369410000	229680000	128720000				2	1	1	15.3	8.4	8.4	14.806	0.0080228	1.7913
24909000	0	24718000	0	0	0	0	14561000	11162000	1212100	0	0	0	18462000	9103400	29576000	0	0	15631000	4796500	10120000	24513000	6733900	19269000	10652000	7986600	76909000	0	0	10688000	28452000	0	0	0	4957400	6603300	12113000	56571000				2	1	1	46.2	26.9	26.9	8.9543	0.0030977	2.3277
4296700	0	0	0	1536100	0	4396500	0	0	3216400	1439600	0	3312400	3412800	0	0	0	0	0	0	3166400	3226600	0	2265100	3495800	2941900	2476500	3482200	0	2890900	2452700	3342900	0	5161100	0	2069900	0	0				1	1	1	5.8	5.8	5.8	51.417	0	6.114
0	5511500	4312700	5027800	948310	1046900	0	5329100	3090200	2702200	4666700	0	0	7177900	4614900	4849300	0	0	0	6330000	0	6073700	0	0	5186300	3398300	3294700	0	0	2719800	0	3010300	4322700	4127800	3072000	7190500	6734100	8665000				2	2	2	10	10	10	40.907	0	8.2462
28830000	0	44254000	0	6784100	69892000	22824000	61237000	56004000	58072000	57951000	92971000	77878000	0	40851000	45505000	22727000	21676000	16021000	43462000	48953000	0	0	50457000	83879000	56061000	43271000	39972000	42119000	87067000	0	0	38963000	0	52002000	0	52625000	0				2	1	1	13.7	5	5	24.267	0.0085008	1.7584
8743200	9101300	16066000	10439000	6202200	1015900	15598000	2027200	10473000	13601000	12098000	2510900	10002000	6666500	3584400	4869000	4783000	0	3103300	2997100	4478700	2409100	5796700	5518000	3986100	2643300	5325200	12773000	5655600	6291600	2315100	2729000	15693000	21923000	8087400	7557000	5430600	13962000				7	7	5	22.9	22.9	15.5	48.053	0	15.228
43457000	88851000	119830000	45457000	60937000	137600000	72955000	54571000	83213000	53233000	57373000	29067000	39049000	47244000	2112900	38910000	81029000	23590000	11974000	55243000	15885000	45290000	31915000	65450000	104120000	82319000	88220000	59215000	71895000	63721000	88012000	89861000	85827000	35700000	42386000	22934000	38989000	41248000				8	8	7	20.8	20.8	19.2	61.99	0	16.972
0	1126700	2430300	3725300	28901000	0	2929500	3310200	0	6690000	4204200	3227800	3119000	3200000	2785700	0	0	0	0	2950500	0	2345300	3669600	8176500	1640400	0	1336400	1280700	0	0	0	0	1501800	0	4870000	8283700	3355000	0				3	3	3	24.3	24.3	24.3	34.87	0	50.562
684140000	602140000	650270000	425160000	569280000	689220000	641340000	456420000	573070000	733290000	678960000	458670000	463090000	772180000	615120000	766640000	745570000	833070000	875070000	738870000	675430000	672950000	621750000	697010000	797540000	604430000	799960000	999910000	717620000	743090000	800870000	567550000	621200000	747290000	598530000	465910000	738110000	693330000				18	16	15	31.2	27.7	26	94.511	0	323.31
6756300	10860000	5414300	10358000	4937800	0	4096400	0	0	0	7340700	0	5724400	0	6125000	5426700	6397300	0	0	17881000	5589600	0	15351000	0	4453300	7505600	6240800	0	4515900	0	7232000	7417900	0	6405700	6498200	10127000	0	10733000				3	2	2	9.8	8.3	8.3	56.501	0.0025855	2.4968
29732000	81891000	47846000	38451000	53068000	50058000	71225000	30274000	76990000	47671000	49541000	55367000	29937000	59872000	53743000	29526000	73553000	28277000	45433000	29856000	42356000	72500000	61073000	102610000	71429000	49674000	69692000	64608000	81875000	109480000	114230000	78047000	56515000	30555000	44344000	43166000	39940000	38350000				4	4	4	71.9	71.9	71.9	10.403	0	21.263
1146500000	1133100000	970970000	740210000	938830000	980140000	881470000	1021400000	845060000	979930000	884360000	881450000	632340000	1039000000	832290000	1126200000	974180000	1082700000	1045500000	978500000	767170000	1366400000	789590000	851260000	1040000000	1147300000	1378100000	1221400000	957450000	1009400000	1256800000	899480000	931810000	1042700000	843840000	813730000	994480000	1218700000				25	25	20	39.3	39.3	31.8	105.36	0	323.31
18466000	14472000	15039000	21657000	8631100	14986000	7553700	25863000	5197400	17866000	13885000	11982000	8712100	25509000	10882000	12491000	8820800	22783000	0	11438000	8848100	16043000	8926200	11281000	10688000	11898000	21613000	10950000	9944100	14224000	9226200	11838000	18354000	9732800	10383000	19092000	28585000	25536000				3	3	3	10.3	10.3	10.3	54.933	0	65.792
3407900	2849000	2885100	0	0	3271800	4025600	2582000	1392300	2459600	1744700	2797800	2196400	2976400	0	2313100	2151300	0	0	3172300	3119900	0	0	1781500	2144600	0	0	0	0	2928400	2051100	0	2159400	0	1690000	1667400	0	2194200				1	1	1	3.8	3.8	3.8	47.173	0.0062893	1.886
0	9832300	0	4806900	1633500	0	1241400	0	5726200	5735900	0	0	995610	2451400	3350400	3169000	0	0	0	0	0	0	0	0	0	5424800	2514700	3000900	4595800	0	3801800	0	3074100	9924900	0	2238800	1305000	6310500				1	1	1	4.2	4.2	4.2	50.945	0.0015074	2.8394
524230000	548010000	964320000	411490000	683170000	737970000	848900000	424740000	409820000	679140000	567010000	923180000	516810000	809470000	543340000	718820000	606820000	879520000	550980000	620320000	750520000	805070000	362990000	551940000	753820000	501640000	719800000	506670000	637720000	548800000	655080000	428600000	710980000	634740000	765390000	518980000	881750000	529570000				11	11	11	27.1	27.1	27.1	66.294	0	323.31
182290000	126890000	207940000	76418000	139810000	115720000	187710000	205030000	158880000	205040000	188920000	181870000	75380000	146420000	143170000	89292000	101210000	50274000	174850000	138020000	132430000	185700000	131370000	112210000	118640000	72534000	163330000	132850000	130560000	144140000	103110000	75102000	284930000	199180000	155450000	156940000	149250000	137840000				9	9	9	22.6	22.6	22.6	86.47	0	90.941
3365800	0	7390700	3342900	0	6915200	4627400	0	0	6097800	2058800	0	3448900	2630200	0	10392000	3997400	0	0	0	23613000	0	0	2905900	3337200	0	3648600	0	0	0	8824100	0	2631700	8127300	0	9091700	7148700	9101800				2	2	2	15.5	15.5	15.5	27.209	0	11.201
4734800	39879000	18318000	27557000	42179000	51421000	21652000	21499000	22000000	14448000	3141900	30754000	10893000	11888000	18462000	43682000	44638000	0	28062000	15530000	10692000	15556000	35935000	34879000	27094000	16514000	8907900	21079000	29831000	10945000	42132000	32732000	12847000	27973000	16600000	56199000	19372000	29145000				3	3	3	24.9	24.9	24.9	27.543	0	28.088
1011400000	997220000	774860000	1113400000	988380000	725710000	967740000	958350000	765760000	785740000	976830000	907860000	921560000	790110000	649780000	640220000	704290000	1162700000	899160000	617720000	622380000	1000300000	1133600000	644300000	476320000	639930000	789180000	481480000	452640000	596260000	724260000	910650000	785240000	452250000	667680000	792350000	929110000	786660000				7	7	6	52.3	52.3	49.5	29.644	0	24.465
12886000	0	18346000	4389400	0	20936000	15425000	25224000	30013000	30738000	14769000	19178000	8686100	17788000	12006000	19428000	11347000	11780000	11246000	15511000	21834000	31503000	45246000	21189000	20604000	13320000	13662000	12121000	11322000	16663000	21080000	18764000	21636000	7513100	13362000	7835300	0	20869000				4	4	4	10.5	10.5	10.5	59.382	0	9.942
12351000	25369000	22817000	10814000	6099600	38913000	16509000	10983000	0	12888000	14586000	0	26341000	21112000	14499000	0	0	0	0	14174000	0	0	6426900	0	0	76169000	0	0	15704000	0	0	0	38921000	20033000	18167000	11780000	17870000	0				2	2	2	27.9	27.9	27.9	19.206	0.00061958	3.1013
2447300	2497000	0	0	2946900	0	8305900	0	3767100	0	0	3843400	6009500	0	0	0	2760900	0	0	0	0	0	0	1869100	0	1542700	1570400	0	2168600	2124600	1424000	0	2215200	0	3368400	1962000	2091700	0				1	1	1	5.8	5.8	5.8	29.014	0.0028571	2.4637
27857000	23062000	20320000	0	36929000	16121000	15689000	18043000	22373000	30563000	38220000	21813000	25022000	12688000	0	19479000	10833000	5305500	0	0	38914000	0	27529000	21137000	45884000	43014000	17568000	16649000	18678000	23213000	32792000	80920000	26219000	0	74174000	0	16767000	20803000				2	2	2	14	14	14	19.471	0.0030968	2.3247
42643000	58016000	35581000	42745000	41798000	81470000	71419000	42828000	29222000	29157000	32762000	78882000	91901000	67511000	43464000	63469000	153970000	45246000	39103000	22678000	111420000	89421000	63403000	59961000	76443000	112530000	93912000	66744000	83981000	57960000	73892000	40955000	22134000	55793000	40402000	33887000	33980000	52377000				5	5	5	14.8	14.8	14.8	65.596	0	323.31
35927000	34389000	56071000	46371000	49247000	76735000	56346000	65452000	17710000	66699000	58076000	48527000	51540000	84371000	75589000	84558000	134030000	54926000	100870000	81489000	88508000	79859000	105840000	45095000	65632000	39803000	49838000	51892000	63537000	65584000	80703000	40090000	44038000	81403000	59281000	57357000	79410000	84076000				8	8	8	43.5	43.5	43.5	37.893	0	173.31
4605300	1831900	3144500	0	4624400	0	0	5889900	0	0	4624700	0	0	5485500	0	5684500	0	3908800	0	0	4608300	5065800	0	6047300	8811500	6322100	9800500	6277800	9505500	0	4289000	7169700	7389600	5859300	6977700	0	3567800	3672800				3	3	3	14.7	14.7	14.7	26.724	0.00033146	3.8043
0	0	0	0	0	0	0	0	0	0	0	0	0	0	0	0	0	0	0	0	0	0	0	2040400	0	3470600	2495100	0	0	0	3360300	0	0	0	0	0	0	0				1	1	1	4.2	4.2	4.2	47.924	0.0026087	2.5471
141840000	168220000	115980000	111500000	147830000	137720000	116340000	112500000	165830000	127720000	151770000	113330000	102790000	186480000	91091000	98599000	118890000	98045000	116120000	213240000	110850000	135590000	60384000	142920000	132070000	232670000	122350000	147370000	134270000	135050000	117090000	159160000	147060000	112440000	104190000	141870000	82594000	161240000				8	8	7	32.9	32.9	30.1	47.46	0	105.45
509710000	352320000	680110000	389150000	593390000	464580000	281000000	482240000	393710000	605420000	678060000	429560000	469170000	819070000	456430000	735140000	355470000	881520000	450680000	590760000	542210000	593260000	347670000	596550000	705890000	488680000	913540000	846630000	341930000	675810000	608080000	328850000	727830000	605380000	567290000	480810000	594480000	878470000				11	11	5	41.6	41.6	19.3	46.258	0	257.79
30497000	11316000	2129700	9226900	1842400	0	4281400	2448100	5414600	4195100	1634200	0	1848000	0	12432000	0	0	2201900	0	0	3162300	0	3964700	5612600	5564300	10512000	4806600	5071800	3781900	9979100	8257900	9226400	1821500	2568100	3770100	0	0	0				1	1	1	15.4	15.4	15.4	16.288	0.0015006	2.7996
169270000	43599000	166600000	330580000	186770000	102670000	79595000	196310000	324650000	168550000	165540000	85555000	101270000	78755000	148530000	138320000	189150000	0	0	0	239340000	0	0	192180000	140100000	265670000	193390000	144850000	154480000	244990000	174310000	194050000	183520000	174330000	142510000	146590000	113330000	280370000				1	1	1	12.2	12.2	12.2	11.153	0.0055911	1.9847
12783000000	10065000000	13361000000	15137000000	8027300000	13324000000	13165000000	10192000000	9710500000	9628600000	7951300000	13417000000	9048900000	11611000000	10152000000	10784000000	14036000000	10967000000	10112000000	15074000000	10050000000	12598000000	9491900000	11446000000	11521000000	10479000000	11041000000	10484000000	12060000000	8738400000	15349000000	8967600000	10359000000	10801000000	11216000000	12596000000	13655000000	11454000000				12	12	12	51.5	51.5	51.5	36.612	0	323.31
4270700000	3421000000	5255600000	5088400000	4291300000	3415500000	3496600000	3895700000	2804500000	4252200000	4635600000	5321100000	2738500000	3389900000	4393200000	4113200000	2679300000	2684100000	4220600000	2696900000	3578800000	3097500000	3850500000	4983900000	3861300000	2790900000	3390300000	3193600000	2981600000	3823600000	3751400000	3416500000	5365600000	5534200000	3901800000	4734200000	5694200000	3191200000				11	11	11	54.2	54.2	54.2	36.618	0	323.31
6157500000	4760800000	8069600000	6668000000	11878000000	8308600000	10093000000	4521300000	6067200000	7051300000	8916800000	6921500000	7398400000	8345400000	5569500000	9032600000	6097900000	5980100000	5852600000	7690000000	8448700000	5614000000	5624900000	6302600000	9353900000	6612800000	9741200000	8618000000	8819400000	7634800000	10200000000	6844000000	10830000000	7188200000	8473200000	7788600000	9165800000	5441400000				11	11	11	47	47	47	35.484	0	323.31
142710000	170970000	103940000	93447000	383450000	214820000	268100000	92091000	139190000	91966000	107940000	206620000	190550000	141290000	74382000	204390000	148340000	179350000	113710000	91771000	145870000	99074000	108870000	97178000	86419000	176030000	144360000	133300000	119030000	117060000	164960000	64507000	68785000	107170000	77012000	108270000	121270000	103060000				6	6	6	40.1	40.1	40.1	34.161	0	80.722
21181000	12688000	8094300	612640000	221180000	25136000	10300000	5392600	37356000	1605200	10577000	0	79632000	11434000	0	24841000	0	0	0	0	0	3495600	0	0	97599000	0	0	0	0	0	7313300	5691000	2962700	0	16469000	0	0	0				4	4	4	12.4	12.4	12.4	54.861	0	48.66
38133000000	18517000000	32060000000	29858000000	41939000000	27506000000	39441000000	36810000000	29407000000	33664000000	66227000000	45332000000	29510000000	26017000000	25826000000	32720000000	50335000000	45344000000	33775000000	33501000000	28114000000	26371000000	37500000000	41433000000	37416000000	38412000000	39564000000	52742000000	36609000000	31218000000	40321000000	31436000000	35015000000	41688000000	43161000000	31829000000	43805000000	40944000000				12	12	9	63.7	63.7	52.9	35.836	0	323.31
2940800000	2392400000	2523900000	1563500000	2496600000	2227600000	2247800000	2749000000	2375500000	2781400000	1581600000	2716900000	2037400000	2433500000	2378800000	2365400000	2795400000	4168200000	2259500000	2923300000	2521700000	3149900000	2107000000	3247800000	2786800000	3399900000	4501300000	2729900000	2896300000	2782700000	3436400000	2666400000	2636900000	2162300000	2143800000	3255900000	3578500000	2564900000				17	17	17	41.2	41.2	41.2	61.397	0	323.31
22186000	11576000	8589200	9475200	7815200	8905700	7720100	11307000	9348700	7565500	5337800	17263000	16484000	15159000	6919400	8325900	20290000	10533000	0	14489000	6500400	11072000	11959000	6401500	4909900	8247100	4297800	11862000	9246900	6862100	10155000	6836800	5334900	5432600	6727900	7720600	8517200	5852500				1	1	1	8.1	8.1	8.1	21.455	0	25.065
31349000	0	23752000	68812000	29171000	30243000	36494000	24229000	42012000	14170000	22806000	29013000	7144900	46109000	4575300	37549000	0	0	0	0	2311000	2334800	0	0	0	8682100	8553600	29095000	57188000	0	25067000	0	48720000	38470000	65911000	19024000	35377000	13728000				5	1	1	28.8	8.3	8.3	31.628	0.004894	2.093
34231000	78542000	150860000	30911000	53676000	39420000	122650000	57304000	135830000	96224000	30960000	21313000	85858000	19865000	39133000	55876000	43391000	31482000	57520000	46039000	0	290370000	0	46710000	50260000	63468000	44340000	86300000	46195000	54906000	59131000	51618000	44692000	79345000	49349000	9185000	60548000	52595000				2	2	2	8	8	8	47.267	0	6.4936
86348000	88638000	29824000	351840000	112390000	53717000	41440000	116070000	140840000	45632000	27246000	75768000	89272000	63125000	54151000	24076000	53531000	12731000	42571000	37333000	50448000	25347000	175000000	63604000	36509000	50377000	11678000	66125000	28424000	43403000	25759000	147770000	33588000	44379000	33856000	22540000	17997000	23148000				6	6	6	9.1	9.1	9.1	122.2	0	22.823
216430000	186240000	43679000	123230000	75445000	156550000	131500000	203810000	238400000	131700000	198300000	165370000	113650000	92274000	220590000	133680000	81897000	169160000	109310000	137890000	129050000	194740000	77630000	114890000	167600000	192470000	268150000	170850000	192780000	155250000	281930000	104110000	168270000	142740000	141820000	101260000	228680000	314340000				4	4	4	20.8	20.8	20.8	32.118	0	119.14
2148800000	2401800000	2113500000	1618300000	2379700000	2540800000	2565600000	1684100000	1961900000	2029700000	2410200000	2520500000	1903600000	2101500000	2452500000	2937500000	1935500000	2735900000	3651400000	2975700000	3336900000	3477300000	2154900000	2877400000	3779400000	3290900000	3286600000	2596300000	3993100000	3587000000	4410900000	2053200000	2511600000	2897400000	2321600000	2079000000	2053700000	2354800000				14	14	14	55.9	55.9	55.9	46.474	0	323.31
7312200000	10178000000	8615000000	9611300000	24562000000	13442000000	9380700000	6127700000	5872200000	8196600000	16917000000	8650300000	15768000000	8798300000	7675900000	16542000000	7197100000	12697000000	11954000000	12337000000	14159000000	16391000000	9009900000	10198000000	20717000000	8520100000	11807000000	10240000000	10755000000	10814000000	16499000000	9208700000	10279000000	12140000000	11694000000	13171000000	8594800000	9380800000				14	14	10	52.1	52.1	42.1	47.436	0	323.31
338300000	509460000	580290000	408530000	400630000	424640000	451310000	444080000	526260000	589110000	477440000	489110000	450530000	442000000	570300000	568030000	414040000	355170000	382060000	380900000	525600000	413930000	498650000	504420000	593250000	374470000	513350000	311840000	447780000	494150000	398690000	352250000	648960000	526450000	461740000	685550000	377120000	532360000				8	8	7	52.1	52.1	47.4	21.639	0	166.58
23738000	14258000	15919000	14831000	6531800	13231000	14028000	22223000	34215000	14705000	13979000	4348200	24304000	25846000	15443000	17982000	26488000	0	0	13311000	0	18407000	14486000	17527000	15054000	10621000	9466600	13932000	8212700	8804700	9089200	14195000	9267300	21273000	7858300	23212000	13617000	19945000				2	2	2	10.1	10.1	10.1	36.779	0	18.037
2853900000	2047300000	1934200000	894030000	2116100000	1510500000	1180800000	3063300000	3965600000	1084200000	1414700000	1717000000	1886500000	2297000000	2147600000	1437000000	3162300000	1867200000	1385800000	1494500000	1341100000	1381600000	2256600000	1857700000	1156000000	2288100000	1324600000	1355400000	1361400000	1510500000	1983700000	2361700000	1252900000	1215400000	2309100000	1373600000	1972300000	1961300000				10	10	10	43.8	43.8	43.8	37.294	0	271.25
0	0	6892700	1798900	0	0	1705100	5307900	11382000	6711400	9199900	8287500	3039100	0	5675500	0	1184500	0	0	0	8625800	0	0	0	12433000	23367000	15405000	11564000	0	17983000	5333900	8625100	4505200	0	10949000	0	5773900	0				2	2	2	17.2	17.2	17.2	11.139	0.0070459	1.8541
1633800000	2077200000	2257700000	1155500000	1771400000	2813500000	2722200000	1282400000	1655500000	1937400000	1529900000	2006400000	1457100000	1935200000	1664900000	2120400000	2046500000	1978000000	2251900000	2196200000	1477100000	2559900000	1368400000	1208000000	1458200000	1641600000	1760600000	1944300000	1984000000	1635500000	2804500000	1079400000	1832800000	2006300000	1619400000	1801600000	2056500000	2214900000				12	12	6	41.2	41.2	28	51.629	0	189.02
0	0	0	0	266310000	464380000	621300000	0	3334600000	0	0	362710000	51014000	125960000	0	23831000	0	0	0	0	0	0	0	785690000	80401000	794800000	324430000	0	0	0	0	0	0	542880000	0	0	0	0				1	1	1	5	5	5	29.246	0	64.643
28386000	34924000	7641600	96021000	46470000	10481000	0	32965000	25694000	10439000	0	17894000	29088000	39010000	20634000	16377000	38992000	0	12806000	4990400	16176000	6093800	50611000	9766900	0	27031000	8712700	21142000	0	5866600	0	57372000	6618300	0	0	11352000	12300000	7988900				2	2	2	7.3	7.3	7.3	52.602	0	71.885
0	48997000	29811000	0	0	254390000	43225000	402720000	321500000	0	0	476300000	8975300	0	0	0	42280000	0	177440000	0	0	0	515820000	25397000	9095400	52408000	0	0	0	5811200	0	1959500000	0	0	48446000	5584800	44571000	0				2	1	1	1.8	0.9	0.9	163.29	0.0030505	2.2217
331330000	265170000	90300000	1126400000	418690000	218620000	135530000	1116900000	1035900000	176980000	80147000	217870000	784060000	223080000	315750000	124450000	311690000	1926200	645980000	192260000	389730000	216330000	2963200000	340980000	134020000	250330000	28097000	408590000	219760000	363410000	247200000	1938000000	168290000	168470000	148180000	153590000	148760000	111910000				40	40	40	39.4	39.4	39.4	186.8	0	323.31
20498000	33375000	21443000	0	19676000	8355400	33781000	20219000	17234000	53225000	14382000	17114000	46290000	0	13587000	14458000	4664400	24086000	0	0	15760000	0	0	22095000	25124000	27834000	22228000	27954000	21092000	26161000	25527000	32947000	42950000	17487000	24614000	22131000	46470000	19595000				5	2	1	44.4	11.1	4.8	21.229	0	9.0694
121320000	131460000	142650000	91061000	104130000	186430000	193310000	79791000	76030000	122840000	103130000	146860000	124890000	235770000	141170000	146610000	129980000	152000000	76056000	130420000	120220000	169170000	150670000	78652000	76662000	116700000	120710000	57902000	124180000	74839000	113140000	54718000	137040000	121330000	95717000	51252000	103270000	121110000				6	6	2	54.8	54.8	13.3	21.424	0	247.6
7650200	6932300	2828400	4313800	1875900	0	7809800	10807000	1304400	2882400	8004000	8906300	11999000	0	15831000	9640300	18367000	0	7166000	4831900	5965500	24210000	23998000	0	0	3594300	2676800	1141300	0	3197500	3567400	0	0	7291300	5275900	7722700	12076000	2155600				1	1	1	28.4	28.4	28.4	12.735	0	7.9808
0	0	0	8916900	0	0	0	5377400	5755800	0	0	0	16550000	0	24143000	4451600	0	0	0	0	0	0	0	35565000	0	0	0	0	0	14571000	7334300	41214000	0	0	0	0	0	0				1	1	1	12.8	12.8	12.8	12.778	0.00064662	3.4885
1189000000	864930000	378200000	4162800000	2443600000	847070000	451530000	5880700000	4333200000	406300000	326220000	1330800000	3902900000	807380000	1385300000	422820000	823670000	328970000	1236200000	450060000	588430000	699550000	1227600000	1080400000	356130000	889090000	301140000	753690000	354210000	667700000	312500000	7407000000	316800000	444940000	512180000	1158000000	519110000	296750000				4	4	4	68.6	68.6	68.6	11.003	0	323.31
1807200000	4640400000	4543400000	566750000	6333500000	3304300000	3891200000	687780	262980	670070	772280	0	0	0	0	0	0	0	0	0	0	3030700	0	575770	0	0	1151900	498400	0	0	0	0	0	0	0	0	0	0				8	8	8	42.4	42.4	42.4	36.105	0	323.31
16518000000	25695000000	29306000000	30279000000	39925000000	9340200000	11257000000	20512000000	24213000000	21997000000	18268000000	12390000000	4137700000	13139000000	38880000000	14138000000	15639000000	9003800000	12375000000	11560000000	35282000000	13908000000	11586000000	66557000000	10381000000	24597000000	25745000000	14635000000	15489000000	45304000000	23468000000	16314000000	16230000000	19574000000	18755000000	15465000000	21685000000	44047000000				5	5	5	61.7	61.7	61.7	15.039	0	323.31
899500000	114400000	0	0	0	0	0	21524000	0	0	0	38277000	15877000	0	0	0	0	0	0	0	0	12343000	0	0	0	0	0	0	0	0	0	0	0	0	63095000	0	963780000	0				2	1	1	19.7	12.9	12.9	16.055	0.0028433	2.4097
14436000000	4712700000	12761000000	14796000000	18205000000	7810700000	11022000000	7387900000	6265800000	11677000000	25786000000	8425100000	10046000000	8925200000	52274000000	7813400000	26221000000	5965100000	14589000000	11565000000	21538000000	9110600000	7518400000	40754000000	15986000000	27943000000	21440000000	9571600000	20801000000	44875000000	21813000000	23870000000	9222000000	6668400000	13046000000	19140000000	15494000000	18692000000				7	7	5	58.5	58.5	42.9	16.165	0	323.31
0	0	3449100	0	0	0	0	0	0	0	0	0	0	0	0	0	0	0	0	0	0	0	0	0	0	0	0	0	0	0	0	0	0	0	0	0	0	878330				1	1	1	10.4	10.4	10.4	17.084	0.0028531	2.4405
0	0	0	0	0	0	0	0	0	10800000	0	0	0	0	0	0	0	0	0	0	0	0	0	0	0	0	0	0	0	0	0	0	0	0	0	0	0	0	+			1	1	1	1.4	1.4	1.4	138.94	1	-2
0	0	0	1754200	0	0	0	1508700	0	1087500	0	0	0	0	1592700	0	0	0	0	0	0	0	0	0	0	0	0	0	0	0	0	0	0	0	0	0	2054200	0				2	2	2	17.2	17.2	17.2	29.78	0.0070533	1.8586
0	0	0	0	0	0	0	0	0	0	0	0	0	0	0	0	0	0	0	0	0	0	0	0	0	0	0	0	0	3734600	0	0	0	0	0	0	0	0				1	1	1	1.2	1.2	1.2	127.98	0.0028458	2.4183
58321000	58936000	0	0	0	0	0	5943500	0	0	0	0	0	0	0	64427000	0	0	0	0	0	0	0	0	72493000	1354700	0	0	0	0	0	0	0	0	0	0	0	0				3	3	3	16.2	16.2	16.2	19.746	0.0015011	2.8039
3956200	4922500	0	9668500	2081300	2551900	0	8919000	6594800	4597200	0	4167700	6027300	1511300	6554400	410200	0	0	0	1184900	0	0	0	11240000	1943400	7015000	0	0	0	897760	0	3476400	0	0	1139100	3310500	373460	0				4	3	3	15.3	13.4	13.4	53.628	0	18.372
124990000000	75552000000	35062000000	88849000000	83398000000	37452000000	36529000000	130850000000	119330000000	54783000000	36329000000	46778000000	67446000000	46042000000	47362000000	19935000000	57687000000	21222000000	45280000000	19126000000	38080000000	17788000000	92268000000	58098000000	19748000000	64842000000	28997000000	41260000000	27572000000	42248000000	21009000000	75812000000	30426000000	30649000000	64008000000	63322000000	31048000000	27882000000				23	23	20	53.4	53.4	47	53.667	0	323.31
15089000	21038000	0	0	0	0	2751400	21358000	28573000	0	6690900	0	0	11164000	11782000	7539800	6958000	0	0	0	24630000	0	0	18698000	17466000	17295000	14780000	20173000	20068000	62754000	21256000	122810000	42042000	29519000	24234000	13785000	0	0				6	1	1	11	1.6	1.6	62.852	0.0030598	2.2275
313830000	202790000	551930000	233490000	207370000	478610000	421810000	224680000	336500000	798620000	909660000	1227700000	247880000	718590000	777600000	525630000	709660000	662860000	1223900000	919450000	759550000	759320000	352260000	686290000	606640000	758020000	1321500000	1047500000	1043800000	866290000	720790000	350590000	327840000	272210000	413640000	493210000	795850000	685370000				12	10	4	34.4	30.8	12.8	62.071	0	323.31
64116000	51586000	136820000	66781000	9809300	134300000	123850000	59019000	107800000	113330000	163320000	119900000	143010000	83606000	55513000	84184000	77553000	191510000	0	89106000	124650000	23623000	38435000	76466000	114120000	106700000	108920000	88816000	83598000	24214000	108330000	95121000	55189000	64334000	82393000	169550000	118970000	117350000				20	1	1	64.5	4	4	50.068	0	19.382
5360400000	7030500000	7528900000	2936500000	8012100000	4197000000	5131800000	6423800000	5963100000	5027400000	5778200000	7253000000	3860400000	7993200000	4202400000	7139600000	6769900000	4717400000	3697500000	4666400000	4155000000	5068600000	4506700000	3210100000	5284900000	6310900000	11071000000	3947300000	4849000000	5650700000	5922200000	5448600000	7017100000	5415400000	5249200000	2900700000	6078900000	5403000000				20	3	0	71	8.1	0	49.86	0	323.31
84910000	87896000	27965000	13999000	144460000	29116000	29501000	238110000	259580000	38193000	61208000	24502000	395700000	100020000	207890000	75342000	171220000	23663000	171100000	104700000	103060000	30347000	569210000	259900000	63251000	201660000	35769000	93230000	130540000	179630000	0	1319600000	13405000	12861000	66971000	37372000	32345000	18038000				1	1	1	2	2	2	69.756	0	173.36
13559000	11138000	0	825400000	19486000	4495200	0	42826000	62530000	11905000	12722000	9734800	146580000	25359000	117560000	9008800	31292000	0	0	0	15627000	0	151830000	101040000	13971000	33825000	0	47286000	14971000	35702000	0	332960000	18249000	0	15189000	0	0	0				3	3	2	8.4	8.4	6.3	55.928	0	55.655
83750000	241220000	21255000	979290000	78354000	6305100	0	209180000	319740000	113830000	56800000	0	188740000	67908000	384700000	66919000	269350000	0	69529000	80021000	142370000	71476000	417240000	248830000	65182000	280930000	17686000	84261000	98773000	194500000	59271000	1139200000	25629000	0	64663000	0	0	42725000				2	2	2	9.8	9.8	9.8	49.496	0	40.722
7338500	7446900	740760	27275000	17017000	8392200	9998400	13614000	13660000	6165500	0	33662000	29510000	12447000	5150900	0	6706900	936000	11512000	0	0	0	24407000	0	0	4001300	799790	8903500	1705500	3074600	1127600	17709000	1608700	2541400	2964900	7207100	2728300	3305000				1	1	1	4.3	4.3	4.3	38.298	0.002369	2.6818
200570000	161060000	7340500	792160000	253370000	58689000	21150000	167480000	167560000	31551000	88764000	120880000	277570000	129930000	198480000	0	177580000	0	28552000	4627000	335460000	14972000	291680000	102720000	4355800	99043000	4206900	36387000	2492200	198950000	6650000	351230000	0	3930700	27807000	13165000	6874900	3794800				15	15	1	12.6	12.6	0.9	240.51	0	323.31
0	0	0	7341800	0	0	0	0	0	0	0	0	0	0	0	0	0	0	0	0	0	0	0	0	0	0	0	0	0	0	0	0	0	0	0	0	0	0				15	1	1	12	1.3	1.3	262.4	0.0006248	3.1846
161110000	130690000	58673000	0	6045500	34556000	13597000	217050000	167550000	103870000	0	0	208990000	51832000	108710000	0	322730000	0	25630000	0	88899000	0	64543000	119660000	37537000	181100000	0	17464000	0	63136000	0	68201000	3142100	0	67411000	244280000	0	0				1	1	1	7.4	7.4	7.4	20.019	0.00062735	3.2193
0	0	0	0	0	0	0	0	0	0	0	0	0	0	0	80925000	0	0	0	0	0	0	0	0	55151000	1996300	0	0	0	0	0	0	0	0	0	0	0	0				2	2	2	53.2	53.2	53.2	7.3044	0.00065147	3.5739
498660000	329020000	369640000	398520000	175510000	111780000	334740000	220500000	147560000	420560000	112550000	137630000	184790000	271440000	550850000	150360000	144190000	0	129510000	160990000	369430000	124790000	106060000	274670000	304570000	173010000	895550000	361920000	272620000	428530000	438540000	657400000	319520000	282740000	419400000	102380000	562740000	513720000				33	1	1	63.9	2	2	89.288	0.00062093	3.122
12855000	0	0	2339200	44511000	25118000	15889000	5685700	0	4918100	20415000	0	14576000	12677000	13128000	16886000	8048300	20622000	7527000	0	28909000	10651000	13553000	8138600	22882000	10124000	9553900	10838000	7468300	17839000	20952000	5438800	11270000	0	20113000	23477000	15697000	0				2	2	2	10.1	10.1	10.1	39.135	0.00035663	4.9235
11212000	38433000	22787000	11490000	54226000	10986000	29119000	28147000	0	35918000	0	12072000	6706900	0	27844000	52482000	255900000	42721000	0	2979000	0	17036000	0	30295000	68521000	0	46159000	110030000	60598000	69962000	80007000	0	41089000	35331000	115100000	42570000	26672000	22332000				1	1	1	2.5	2.5	2.5	40.584	0.00092564	3.0624
0	4842700	5728500	0	0	1585100	1359600	9765100	3117300	0	0	0	2011000	0	11472000	8143100	3209500	0	0	0	0	0	0	7243300	7360800	4237800	4583800	2465400	4911500	6189300	0	0	4525500	0	6981900	0	0	1982300	+			3	1	1	9.3	1.7	1.7	59.755	1	-2
8392600	15396000	15268000	4063100	33702000	8077900	8690900	8007100	19531000	9509100	11338000	12007000	8964500	6162000	11087000	5089100	16306000	0	11091000	5499400	6898400	7772400	20006000	70958000	17307000	19357000	36108000	26431000	30036000	22587000	18097000	16556000	27203000	4397700	9335400	9809700	6274700	9620900				2	2	2	4.7	4.7	4.7	53.688	0	8.2282
1177600000	605820000	766790000	1478700000	1790000000	1104000000	999160000	1066000000	997600000	1291400000	4308300000	1553400000	1042600000	929990000	1391900000	1518100000	1023200000	1467800000	1003800000	1659900000	1363700000	1576300000	1497400000	2366000000	2727700000	1838800000	3617900000	1608100000	1397600000	1692600000	756020000	1844800000	1855300000	1831400000	1524800000	2457900000	1580700000	1969500000				9	7	7	39	31.3	31.3	39.42	0	240.03
0	0	0	11492000	0	3208700	0	10066000	15990000	0	0	0	11951000	0	0	0	0	0	0	0	0	0	2912400	0	0	0	2126800	0	0	0	0	21372000	0	0	0	0	0	0				4	4	4	1.4	1.4	1.4	515.6	0	33.369
66597000	74077000	70629000	52038000	42344000	61958000	57721000	67598000	75893000	51546000	74664000	71518000	78495000	90115000	59833000	63350000	73567000	76478000	83902000	89328000	52025000	66339000	70576000	48971000	92731000	92661000	65233000	63136000	71466000	56487000	69844000	68371000	64769000	44725000	85012000	59207000	62421000	55157000				8	8	8	21.8	21.8	21.8	76.832	0	123.79
1037900000	1415000000	1311400000	2257500000	772910000	1102400000	1204600000	1141400000	1265900000	1916500000	1159700000	584460000	1550300000	1098800000	435230000	1301000000	816300000	649360000	682330000	545100000	636310000	569180000	1260000000	655900000	401750000	587280000	761990000	408480000	694460000	779800000	568380000	492290000	1177300000	938170000	528460000	1480800000	1413800000	1478400000				5	5	5	60.8	60.8	60.8	15.892	0	216.42
110930000	136800000	134000000	165470000	235490000	138720000	168460000	57866000	101550000	103730000	189940000	145510000	94506000	179390000	149070000	141640000	116180000	81275000	153460000	89928000	161870000	133370000	144520000	85382000	108260000	289540000	112070000	206040000	170310000	145840000	285950000	67724000	188830000	403880000	309170000	81849000	119350000	110490000				1	1	1	8.6	8.6	8.6	18.262	0	131.78
310400000	299690000	411510000	73874000	59210000	187800000	280970000	263210000	232230000	333640000	962620000	367650000	185590000	317830000	227180000	415010000	136920000	454350000	210610000	327530000	317340000	247300000	198460000	202210000	279330000	180290000	628710000	232360000	257830000	263860000	325260000	285960000	318020000	226480000	371570000	443490000	261200000	437370000				2	2	2	14.9	14.9	14.9	17.935	0	133.91
163780000	172380000	303440000	172090000	296710000	95547000	121890000	149550000	284210000	151670000	142130000	165770000	576760000	492430000	181590000	162690000	235060000	218050000	290730000	156420000	185210000	195630000	165480000	109440000	99089000	139580000	320180000	118990000	228980000	172480000	82104000	104460000	296970000	467990000	139760000	131500000	194200000	558690000			+	8	8	6	19.1	19.1	17.2	66.038	0	146.66
398660000	437070000	666550000	596450000	530420000	649570000	542010000	329790000	720250000	758310000	678280000	967170000	655420000	440690000	502900000	860760000	367890000	827320000	873720000	1212000000	776580000	816240000	509110000	340350000	305420000	441520000	484830000	1415700000	1214400000	637050000	729620000	219750000	681820000	852540000	562220000	507650000	456910000	815800000				19	3	2	68.5	11.5	7.4	49.585	0	323.31
24922000	24916000	0	168680000	40353000	3358300	1926900	72846000	40447000	4467400	0	2705300	49362000	4505200	14834000	2655400	6724300	0	31114000	5220300	3217800	0	112040000	14581000	5490200	10844000	2147200	16772000	6228200	6480800	5435000	190650000	0	6250000	3915100	6529200	2338900	6405300				5	5	5	24.6	24.6	24.6	37.69	0	16.7
32409000	7302500	30225000	36281000	7855800	39829000	18982000	5948800	5423500	15243000	31758000	21671000	2572100	28898000	8531000	19745000	30704000	15197000	13982000	56403000	9449300	26582000	17298000	31726000	10857000	17557000	20550000	8715600	11880000	13789000	19993000	13320000	30158000	12374000	6838100	11838000	43996000	7089400				5	2	2	24.2	11.9	11.9	31.548	0	23.799
13922000	17451000	10309000	8699900	8886300	13612000	22158000	11221000	16514000	10834000	17427000	0	25423000	10036000	17849000	13445000	13641000	8701800	0	21562000	16442000	10513000	12287000	11554000	14974000	22866000	13016000	29397000	15823000	19030000	33418000	11545000	12267000	14508000	8468500	11004000	9251800	7264600				1	1	1	4.5	4.5	4.5	49.509	0	7.4147
40027000	15238000	0	30205000	11861000	36902000	52101000	35089000	57428000	0	7971800	14274000	38140000	148520000	45910000	10219000	37676000	11527000	0	20502000	55146000	12189000	22503000	18419000	23091000	36650000	0	21020000	0	0	0	27840000	10621000	11919000	18436000	0	0	15337000				2	2	1	7.4	7.4	3.6	40.933	0	65.87
244560000	225990000	96839000	133670000	109300000	87731000	135660000	203030000	128790000	121110000	113750000	215970000	120580000	65695000	107220000	102940000	110770000	55667000	82143000	162520000	122030000	132790000	198760000	68933000	38559000	70602000	34278000	97411000	88439000	110500000	43158000	42682000	68743000	126290000	84694000	110330000	76321000	104810000				8	8	8	68	68	68	28.068	0	308.1
0	0	0	0	0	0	0	0	0	0	0	0	0	0	0	0	20204000	8991100	18381000	26444000	14827000	24256000	0	0	0	14586000	11883000	18401000	31752000	28463000	7620000	0	0	0	0	0	0	0				10	1	1	24.5	2.5	2.5	68.569	0	16.615
4160900	4454800	2546300	1780700	3425100	6882500	6568900	2562600	2525200	2832100	2566100	0	3114700	0	5209300	0	0	0	0	6162100	0	6244500	3090700	0	0	1097600	603280	0	0	0	0	0	2381600	3620000	4203800	7214100	8319200	4169200				4	1	1	13	4.4	4.4	67.723	0	9.9376
765310000	554800000	465240000	918440000	753280000	684100000	428020000	664970000	618080000	426780000	694680000	502350000	550670000	604230000	406050000	440700000	725810000	601410000	903880000	373250000	513730000	545050000	898680000	405890000	336550000	440140000	400600000	429510000	385640000	465990000	549000000	682770000	375470000	536720000	340060000	619760000	424760000	444330000				9	6	5	36.9	26.8	22.5	40.45	0	323.31
1228900000	1824100000	1225600000	1121200000	1247200000	985460000	1130400000	1402800000	1655400000	1123600000	1681600000	882740000	1343600000	1618300000	1194000000	1228700000	1802700000	1639400000	1202400000	1380800000	1354900000	1404300000	1068100000	1031000000	1205600000	1517300000	1796400000	1212700000	1321700000	1197400000	1475400000	1455300000	997350000	978440000	1010900000	1323600000	1267400000	1588100000				19	11	1	28.9	16.4	2.8	109.55	0	323.31
763390000	736080000	1052800000	387210000	557990000	1484700000	1032300000	743570000	863470000	758350000	588570000	1308200000	859330000	1462200000	900190000	1037200000	825030000	1282900000	602690000	1034400000	819630000	1831600000	748430000	781100000	1241900000	872370000	1150900000	793740000	1054200000	921910000	1612300000	943640000	643650000	974560000	577930000	538760000	951200000	847870000				6	6	6	27.7	27.7	27.7	35.158	0	230.52
3546100	2925600	3280900	0	0	0	4406300	2904800	1096100	3413800	3542100	2839800	6768100	4673200	2545400	6001700	1414700	46541000	3240800	5984800	7649500	3068600	6712400	2419300	3409000	0	1011700	0	1211700	1508400	0	2468900	1855700	3801500	3042600	0	3227800	0				4	4	4	12.1	12.1	12.1	76.759	0.00035511	4.8525
108530000	0	0	0	0	0	3984900	0	21529000	0	5646600	0	0	0	0	0	4001900	0	0	0	0	0	0	0	0	0	0	0	0	7430800	0	12748000	0	0	0	0	0	0				1	1	1	2.3	2.3	2.3	84.781	0.00035984	5.091
0	0	5608500	0	0	0	2744600	0	0	0	0	0	450970000	0	0	2826500	0	2399100	0	0	0	0	0	0	3839100	0	5191900	0	0	0	0	0	0	0	0	0	5055200	0				3	3	3	46.2	46.2	46.2	10.834	0	6.0446
1732700000	1336800000	2065000000	1013900000	753430000	1127700000	619640000	1160800000	1137300000	1571700000	923540000	765140000	956360000	1168400000	1518800000	1286600000	985700000	2821000000	1483200000	955650000	1262500000	1122900000	1099200000	1248300000	1782900000	1448300000	2043500000	1573800000	1521400000	1952400000	1903600000	1256400000	1779100000	1859400000	1482200000	1698300000	2141600000	2407800000				11	7	6	34.2	21.8	16.1	32.852	0	323.31
19296000	9909700	15922000	13134000	14427000	41128000	26299000	24036000	13367000	11321000	19439000	11576000	9492700	14749000	14993000	12938000	18018000	29119000	12593000	32612000	26053000	59933000	3643000	22349000	16807000	10628000	24425000	8556000	15592000	11259000	21388000	18518000	23564000	14865000	18641000	18528000	18443000	12501000				3	3	3	7.9	7.9	7.9	75.001	0	6.4905
898740	4652500	261260	8017500	2292400	1105100	2314500	679930	1786100	1082000	3386900	4157800	1760800	1848900	1742400	1919500	2089700	0	1048600	3792800	2022100	1810700	1403100	642750	0	5589200	0	0	0	2786200	0	3038800	2606400	1703500	2248000	2587500	0	1875400				2	2	2	4.7	4.7	4.7	48.908	0.00061881	3.0805
50535000	42439000	21310000	50430000	34050000	39664000	40316000	38699000	35748000	19136000	74168000	41303000	92725000	20672000	23606000	26356000	22453000	32599000	33103000	28413000	33236000	26018000	5195100	38646000	17931000	19696000	58839000	49049000	59599000	5075400	21652000	47959000	41474000	30340000	28659000	127950000	31423000	12563000				6	6	6	23.2	23.2	23.2	36.112	0	29.862
36794000	64673000	52629000	25165000	34172000	8356200	39893000	74126000	26452000	67404000	14992000	28831000	14815000	25298000	32812000	22213000	42844000	0	5743500	13623000	21766000	17656000	11567000	119140000	72062000	156870000	82556000	61665000	54129000	64659000	93329000	100980000	15347000	57689000	35575000	75714000	14443000	0				2	2	1	16.8	16.8	7.7	17.459	0	14.95
45901000	107600000	54292000	77979000	46697000	69545000	91549000	44854000	71306000	52734000	57431000	61766000	29837000	36780000	41844000	58018000	40258000	30872000	41207000	110430000	53683000	43860000	84028000	55461000	62282000	74900000	34970000	60120000	83090000	54880000	131830000	48353000	83616000	50582000	40971000	34004000	47458000	43041000				7	3	3	41.1	15.7	15.7	39.379	0	181.4
1114200000	884630000	937580000	934270000	1415600000	1718700000	1077300000	618450000	579900000	444950000	664950000	1242000000	773570000	1090000000	1116500000	838750000	972450000	84756000	611250000	1066300000	886680000	870890000	864750000	694090000	591610000	396130000	448770000	654740000	541780000	644740000	712030000	753360000	600140000	866860000	666270000	874420000	760580000	952960000				4	3	3	57	42.1	42.1	11.514	0	144.63
670070000	1007400000	833890000	1581100000	1266800000	741020000	948570000	1067000000	1150500000	958670000	727880000	929100000	873110000	598200000	688610000	964820000	1064500000	848650000	1005900000	649050000	843410000	311530000	923150000	875270000	984310000	981430000	819880000	679080000	826570000	863130000	943740000	973530000	790620000	754270000	1046100000	714640000	885900000	1232500000				5	5	3	67.8	67.8	42.6	11.665	0	205.69
133950000	98332000	113650000	127420000	53019000	96727000	116690000	82579000	134280000	66580000	81719000	48125000	96483000	100270000	80081000	86596000	59851000	29115000	135660000	55666000	28527000	61467000	102930000	65217000	35196000	93540000	70118000	63880000	77287000	63482000	96934000	42693000	116660000	88280000	58200000	84528000	67496000	52478000				2	2	2	7.1	7.1	7.1	46.836	0.00036483	5.4191
918190	12588000	5693800	0	0	0	4172300	1811000	5026900	3064900	0	0	2342300	0	0	23322000	0	0	0	0	1747500	0	0	0	2399000	16829000	3596700	9814300	0	4530500	0	0	0	4240600	0	964210	0	0				1	1	1	4.6	4.6	4.6	47.183	0.0025944	2.5093
6406400	0	0	8931100	6614300	12469000	0	9057900	4637200	4175800	7682800	0	10740000	0	0	0	11586000	0	0	0	8118000	22335000	9016600	0	0	0	0	0	0	1413100	0	0	5239600	4978500	5297000	0	7730300	0				5	1	1	13.2	3.4	3.4	77.011	0.0055688	1.9576
0	0	0	0	0	0	0	0	0	0	0	0	0	0	0	0	0	0	0	0	0	0	0	0	40631000	0	0	0	0	0	0	0	0	0	0	0	0	0				1	1	1	6.1	6.1	6.1	23.191	0.0075383	1.8262
280460000	348920000	281640000	181350000	254470000	273590000	283760000	254180000	249230000	321530000	337710000	341510000	250980000	309420000	235440000	197980000	477420000	275760000	286740000	242340000	251400000	250270000	233820000	335850000	393530000	253920000	430940000	311090000	347530000	447350000	473980000	315430000	444130000	168540000	295410000	98960000	264490000	217890000				8	7	7	44.8	40.6	40.6	30.025	0	323.31
75127000	47954000	40280000	37088000	24922000	39620000	29721000	88669000	28556000	32907000	20973000	49912000	24575000	38717000	33209000	49022000	41960000	31658000	31460000	37165000	31543000	60332000	37759000	36560000	24649000	51859000	37671000	26139000	29033000	25018000	44639000	62849000	27039000	27784000	39191000	38824000	46375000	42458000				5	5	5	18.5	18.5	18.5	40.786	0	25.502
3407000	2960000	0	3668200	0	0	0	5022100	0	4092100	0	0	0	4592700	3302900	0	0	0	0	5236200	0	0	0	0	0	0	0	3711300	2730100	0	3025000	0	3260200	0	3689300	0	3855400	8200000				3	3	3	5.1	5.1	5.1	155.14	0.0015038	2.821
43505000	41621000	24513000	58597000	50551000	26779000	51305000	29703000	41375000	14907000	23939000	41875000	57159000	71218000	24709000	15530000	22481000	20898000	39795000	0	23024000	0	36023000	46821000	28254000	48394000	20731000	19576000	16225000	38071000	12469000	41789000	16144000	18833000	21460000	52491000	22711000	4595000				4	4	4	14.3	14.3	14.3	68.417	0	26.105
21403000	0	19626000	12757000	23310000	19017000	0	23620000	12559000	23212000	0	8350900	9596800	0	21176000	9363300	0	0	0	0	0	0	12663000	16713000	12541000	19966000	8855000	21233000	7422900	14427000	0	14150000	20140000	6367500	11313000	0	11896000	0				1	1	1	4.2	4.2	4.2	48.766	0.00033591	3.9976
7526200	0	14418000	0	7762000	10827000	26984000	15826000	0	0	20867000	0	11305000	14949000	0	7437500	19067000	0	20552000	0	0	0	0	9756300	8726000	13618000	11548000	17576000	38050000	0	19801000	0	0	0	0	0	0	0				1	1	1	10.4	10.4	10.4	22.059	0.00033636	4.0025
0	0	0	0	0	6471900	0	0	4165700	0	0	9487400	0	4663800	0	4798400	0	0	0	7959200	0	0	44160000	0	0	0	0	0	0	4348300	0	0	0	4649200	0	0	0	0				10	1	1	30.5	3.4	3.4	80.64	0.0015047	2.8232
589280000	449380000	528610000	488480000	165990000	228010000	160030000	401390000	408700000	561360000	460720000	258910000	301830000	253740000	375820000	176280000	198700000	64020000	261880000	291470000	498820000	196440000	433900000	329720000	452740000	327890000	229870000	230060000	235770000	457630000	289560000	943400000	262730000	625990000	371180000	1035500000	691790000	591280000				2	2	2	15.5	15.5	15.5	12.074	0	210.48
15915000000	12035000000	19258000000	14103000000	19696000000	22485000000	19469000000	11837000000	9173100000	17011000000	20002000000	24387000000	15693000000	21768000000	15964000000	20642000000	17344000000	16569000000	18313000000	18124000000	18194000000	19440000000	11020000000	15286000000	18618000000	13230000000	16380000000	13527000000	16798000000	18333000000	18039000000	11956000000	17694000000	18977000000	18252000000	18269000000	18853000000	18867000000				24	24	24	65.4	65.4	65.4	56.559	0	323.31
97813000	98651000	40303000	29934000	86101000	58778000	59817000	37454000	23478000	27210000	19756000	50989000	38373000	85141000	66326000	64921000	67023000	0	46639000	103220000	0	114280000	61359000	23352000	18428000	22513000	23273000	18620000	18127000	11038000	27901000	30035000	30225000	53090000	66669000	62498000	67359000	82873000				5	5	5	39.6	39.6	39.6	25.097	0	109.24
26681000000	38809000000	23271000000	18400000000	13042000000	3469600000	15959000000	27363000000	23422000000	20762000000	21228000000	13694000000	25768000000	16913000000	24658000000	18400000000	38585000000	475100000	5957700000	10969000000	2580600000	34046000000	24545000000	24535000000	37525000000	37313000000	24113000000	29978000000	20046000000	44508000000	35057000000	36586000000	32885000000	5774000000	25854000000	33514000000	24890000000	44335000000				12	8	7	35.7	21.7	20	47.168	0	323.31
584000000	607710000	336460000	598320000	369010000	390110000	298810000	687970000	633550000	463070000	576900000	419650000	439910000	424000000	414910000	305100000	447680000	615890000	682120000	557340000	610690000	419020000	557570000	473080000	441600000	706450000	512620000	514230000	490000000	523210000	505840000	540270000	467440000	456010000	508520000	629360000	486430000	639400000				13	10	10	21	15.9	15.9	93.133	0	323.31
2269000	3714500	2280000	4857100	0	0	0	2543500	2816800	1792800	1781900	0	0	1397800	222730	1209600	0	0	0	0	0	802020	0	4040200	0	1452500	1120000	1644200	1702400	1900700	1643400	0	0	1784400	0	1415700	2079200	2606800				1	1	1	2.7	2.7	2.7	38.177	0.00064599	3.4824
456910000	470430000	377930000	270550000	638850000	749370000	383750000	405560000	352570000	355490000	411060000	446650000	401370000	692470000	411130000	364630000	588430000	724440000	287120000	365270000	419840000	541580000	366670000	424180000	359520000	418480000	595740000	486840000	551100000	546340000	515290000	367040000	331750000	357360000	289180000	329800000	389430000	451970000				5	5	5	32.8	32.8	32.8	29.464	0	323.31
83085000	231630000	127590000	311420000	116600000	27266000	115790000	170280000	292170000	118780000	41993000	109310000	110420000	128360000	92720000	51489000	94106000	86456000	27449000	108710000	66854000	63185000	237920000	114780000	163280000	156730000	81662000	92219000	49930000	167850000	99874000	175560000	133130000	52411000	104330000	59620000	95376000	103620000				5	4	1	20.6	16.5	4.8	28.87	0	150.34
52187000	0	0	0	0	0	0	10364000	32704000	0	0	0	0	0	0	0	0	0	0	0	0	0	0	0	0	0	0	0	0	0	0	0	0	0	0	0	0	0				5	1	0	22.2	6.5	0	28.922	0.0080353	1.8002
106240000	72653000	116290000	92409000	74735000	123890000	109590000	97649000	38202000	122850000	58369000	151730000	129100000	106880000	113870000	112880000	100890000	114050000	94430000	102890000	80687000	59449000	112010000	96283000	132680000	122610000	126860000	132660000	132040000	87821000	106610000	76875000	88704000	87775000	60170000	132320000	103490000	73968000				10	10	10	16.8	16.8	16.8	111.13	0	201.14
4009100	3844700	2081100	0	0	0	0	4468100	5549600	1962100	5058600	0	0	0	0	0	1403300	0	0	0	4210000	0	0	0	5682300	7423800	8203800	6719000	2824000	5748300	3958000	6574700	3909600	1586500	2807500	1792900	3948500	2288300				1	1	1	2.3	2.3	2.3	60.702	0.00032765	3.6391
53820000	15899000	15398000	353580000	69214000	22194000	14496000	75048000	109990000	12996000	772740	11914000	86035000	25805000	54540000	18850000	22327000	0	99857000	15989000	36286000	11645000	330140000	62001000	21139000	30418000	11367000	38578000	18160000	37310000	12033000	435290000	0	3589400	888870	19678000	0	0				13	13	13	30.3	30.3	30.3	90.614	0	277.25
24836000000	32549000000	36786000000	17545000000	21830000000	17704000000	16025000000	29221000000	26248000000	39334000000	76028000000	21954000000	20281000000	22616000000	26588000000	19968000000	24918000000	13455000000	13820000000	15137000000	27619000000	11209000000	20256000000	27912000000	30817000000	37428000000	17550000000	33635000000	27913000000	38372000000	30736000000	26288000000	23760000000	26478000000	22175000000	21907000000	41721000000	20025000000				4	4	1	32.5	32.5	11.9	13.908	0	271.96
0	0	0	0	7856700	8896200	0	0	0	13969000	0	13163000	0	0	0	13349000	0	0	0	0	37403000	0	0	0	0	0	0	0	0	0	0	0	0	15028000	0	0	0	0				4	1	1	19.3	7.3	7.3	52.948	0.0048966	2.0975
171070000	105900000	478770000	106300000	45722000	247150000	141690000	235870000	162140000	569010000	373320000	636130000	156330000	200570000	223800000	174260000	267320000	255540000	282330000	203790000	329930000	235310000	91361000	245070000	195960000	229360000	240640000	337460000	259500000	286860000	194900000	154460000	176470000	264850000	218740000	109160000	529260000	652120000				12	4	4	31.9	9.9	9.9	61.516	0	120.23
238980000	352290000	1332600000	160330000	184200000	513080000	1006300000	479010000	623750000	1881900000	1496500000	1342700000	254730000	2701300000	986010000	833840000	970610000	2041700000	1574200000	1030000000	1563500000	741460000	538920000	679710000	566200000	767830000	2415300000	1056600000	1080800000	957650000	794600000	536220000	856990000	942740000	751290000	735800000	1839100000	1974500000				13	12	4	19	18	6.3	102.47	0	323.31
0	108370000	0	0	25795000	9227600	0	0	0	0	0	17560000	0	0	0	14558000	0	0	0	17291000	0	0	0	0	0	0	0	0	0	16017000	0	0	0	0	0	0	0	0				4	1	1	13.7	3.8	3.8	44.796	0.0026095	2.5481
723370000	838200000	774180000	976710000	918560000	500950000	357830000	964060000	919080000	1251200000	974390000	411530000	829480000	623510000	738810000	694260000	421340000	617220000	599380000	589660000	848140000	634330000	869600000	761430000	646080000	855150000	1111800000	944830000	741760000	990910000	885340000	908320000	1014600000	809700000	759210000	859650000	783900000	839170000				7	7	7	16.1	16.1	16.1	57.116	0	303.68
782210000	872850000	389780000	269620000	285140000	322130000	269610000	580700000	521980000	321620000	497330000	300180000	297270000	509330000	371820000	269090000	355040000	535820000	315840000	524630000	306210000	380650000	234740000	316660000	257280000	378580000	448740000	208960000	272520000	218070000	432070000	380950000	347200000	326930000	297680000	324510000	441560000	663180000				1	1	1	7.3	7.3	7.3	19.167	0	70.983
3685300000	2816200000	2541900000	6398500000	6131700000	5033900000	3936400000	3123200000	4294100000	4117300000	4429100000	4204200000	4052500000	4681600000	2610800000	3342300000	3651800000	1420200000	4512100000	3123900000	2923700000	3676500000	5292100000	2413900000	2094300000	3518500000	3954700000	2826500000	4944500000	2909500000	5553100000	3662400000	3215700000	3480500000	2831700000	2982600000	3351500000	2551100000				18	3	3	63.7	13.3	13.3	49.67	0	323.31
197510000	599260000	267460000	361810000	50709000	332460000	153550000	488350000	530350000	358300000	304240000	117140000	419900000	247240000	257270000	187330000	154850000	135270000	123250000	253300000	344340000	212390000	357030000	345910000	359130000	426710000	245520000	238780000	180930000	389460000	326600000	635620000	264520000	124570000	462560000	679270000	269290000	399800000				2	2	2	3.8	3.8	3.8	58.112	0	6.0956
331800000	406450000	271080000	1743800000	585020000	236010000	279780000	348260000	529170000	613730000	755460000	270400000	256580000	355200000	213780000	135630000	949590000	258640000	267060000	184380000	422530000	98297000	310390000	298690000	181300000	222330000	1812800	5781900	172100000	19625000	136040000	48045000	239300000	290670000	284320000	128420000	227440000	320930000				4	1	1	43.6	11.4	11.4	15.054	0	33.341
8507200	8967600	14291000	0	0	0	21085000	24688000	5666200	7368800	0	16797000	21034000	26876000	14953000	37287000	0	2620300	0	0	0	0	0	11888000	0	1321200	5196500	5527900	12489000	1960200	9505600	0	10589000	18720000	0	6357600	38137000	33787000				2	2	2	13.1	13.1	13.1	30.005	0	5.869
191280000	111730000	151240000	123160000	86340000	177960000	54364000	80549000	103940000	60431000	58176000	54452000	130000000	66592000	60276000	59486000	89940000	140130000	0	112610000	64777000	78085000	71115000	44603000	60953000	88477000	64321000	75966000	82635000	61683000	113830000	66156000	131260000	103290000	116190000	68111000	123950000	111630000				4	4	4	18.7	18.7	18.7	42.921	0	268.84
95391000	89146000	97990000	107570000	101190000	57223000	68493000	116230000	56485000	89593000	78724000	132930000	177450000	106780000	70689000	98451000	95760000	386820000	119110000	96326000	94583000	133750000	74097000	55244000	80559000	34625000	93625000	92046000	67820000	63703000	60212000	40089000	59640000	63289000	70690000	77615000	66787000	109330000				10	10	10	9.7	9.7	9.7	170.59	0	30.628
0	0	0	0	0	0	0	0	0	0	6319100	0	0	0	0	0	0	0	0	0	0	0	0	0	0	0	0	0	0	0	0	0	0	0	0	0	0	0				28	1	1	48.2	4.6	4.6	84.659	0.000344	4.3176
33688000	30871000	26074000	29502000	9518300	45971000	24895000	24934000	19588000	23633000	10202000	51265000	8472000	135280000	28907000	7820400	65203000	0	7559700	26909000	0	34234000	28422000	13133000	3572100	12909000	4304900	5026200	16787000	14775000	3265100	44561000	0	24808000	15800000	33296000	20300000	22524000				2	2	2	10.8	10.8	10.8	43.363	0	152.29
0	0	0	2160500	0	0	0	0	0	0	0	0	0	0	0	0	0	0	0	0	0	0	0	0	0	0	0	0	0	0	0	0	0	0	0	0	0	0				4	1	1	22.9	10.1	10.1	33.67	0.00036617	5.4718
804640000	816890000	836310000	644340000	896340000	963070000	411320000	792380000	733140000	551370000	466950000	345820000	822440000	879840000	771640000	581630000	711810000	819810000	646570000	633040000	889930000	891000000	433050000	638510000	494850000	779640000	703340000	486630000	449420000	439070000	591560000	563920000	604320000	693370000	626110000	551100000	782510000	822740000				4	4	1	22.8	22.8	7.2	27.821	0	266.65
3639400	8172800	0	5241800	2903100	6072000	4449200	4573200	5112200	2855900	3018200	6534200	4575600	2353700	5698000	0	0	0	0	0	0	0	0	0	0	5457300	6496200	3360800	0	0	8605500	8094200	3788200	4992100	5377800	6914100	0	0				4	3	3	14.4	12.9	12.9	60.801	0	18.603
472080000	448230000	539640000	588950000	853080000	503280000	299660000	928630000	650690000	494400000	542920000	320450000	491630000	420080000	415430000	328100000	491200000	464200000	257560000	321250000	501330000	358980000	440560000	591550000	370620000	620720000	1050900000	505980000	235990000	393920000	308160000	679300000	309850000	129810000	461400000	381040000	405710000	377700000				7	7	4	26.2	26.2	17.7	28.684	0	109.14
931640000	620630000	650650000	481320000	985740000	757800000	857840000	350160000	616940000	621250000	1303300000	877020000	564880000	598780000	714130000	773680000	891030000	1003400000	901370000	641410000	836140000	614230000	372540000	560950000	709040000	723280000	878620000	631260000	842210000	780190000	1059000000	634390000	662000000	707200000	763470000	600090000	982670000	953020000				10	10	3	37.3	37.3	8.8	50.212	0	323.31
6162800000	6214900000	6783000000	6645800000	5612000000	6336500000	6885500000	4910400000	4440600000	7729100000	6508200000	6435200000	5263600000	5130800000	7084300000	7314100000	4791700000	5479200000	7136700000	5769000000	5738400000	6485300000	5337200000	7667500000	6733100000	5726200000	5487500000	6995400000	6984300000	6323400000	5776500000	5049800000	6742900000	9259400000	6724200000	9396000000	7046900000	7642400000				18	18	7	52.2	52.2	25.3	63.125	0	323.31
117270000	95696000	125920000	358960000	165960000	238030000	283520000	156770000	94796000	99028000	140340000	147180000	226370000	256880000	404890000	297740000	260170000	312790000	138090000	216750000	223710000	76526000	318950000	173660000	103310000	0	0	123660000	136590000	240810000	234980000	0	108310000	173080000	101350000	137960000	99774000	113270000				4	4	4	6.2	6.2	6.2	154.79	0	15.153
19444000	22531000	13196000	41408000	29643000	34099000	20770000	16841000	19363000	17588000	15510000	10093000	25609000	27782000	21850000	8138600	17441000	5976700	0	6324300	16324000	5915100	31203000	16952000	9636300	13221000	14839000	18774000	20187000	6317300	10364000	22673000	20180000	11121000	11000000	12613000	8046200	7895000				5	4	4	24.5	22.3	22.3	35.828	0	77.395
131800000	298470000	569390000	215890000	326180000	150380000	125950000	536350000	416570000	384120000	243210000	293840000	207570000	483900000	251390000	281420000	190680000	274530000	256660000	153450000	236300000	242710000	123130000	241010000	302410000	283930000	431660000	287380000	219330000	292840000	293500000	310070000	369820000	113930000	357590000	424410000	487920000	284030000				10	10	10	15.9	15.9	15.9	72.423	0	107.37
393050000	370700000	274760000	252250000	380300000	231690000	404020000	455570000	283180000	273680000	315140000	332870000	339940000	446530000	300990000	357170000	443560000	276040000	221710000	473510000	248100000	228560000	276770000	391090000	209580000	346200000	239870000	219860000	189940000	259760000	293130000	353960000	297610000	257710000	241140000	293800000	311700000	229580000				6	6	2	54.9	54.9	18.7	22.006	0	301.65
48405000	108540000	27883000	55463000	82584000	31502000	95379000	145950000	141690000	26689000	71466000	138610000	74676000	35495000	41948000	27037000	75007000	57152000	79207000	110360000	83654000	223350000	56227000	17033000	32170000	33514000	22834000	38630000	56673000	28512000	64498000	45245000	38298000	45135000	25049000	66863000	23414000	91189000				4	4	4	26.4	26.4	26.4	35.766	0	19.845
6990700	6519300	3637300	12080000	0	0	4330300	7908100	8218300	6879100	0	6819800	0	9610700	4792200	5110200	12603000	0	2593700	0	13477000	3505300	4655400	11087000	9321500	19760000	5269200	0	5160200	2181700	2285800	8196900	1921900	3475500	1761600	8258300	1712100	3044700				3	3	3	4.9	4.9	4.9	134.03	0	12.729
58439000	66618000	65444000	53929000	66545000	2141500	23356000	67403000	66676000	60715000	0	0	224640000	4564100	76226000	0	51642000	61470000	45560000	0	0	71760000	0	73737000	50257000	66119000	104060000	46158000	51364000	61577000	96791000	56148000	56827000	0	96336000	24072000	60323000	46923000				1	1	1	2.1	2.1	2.1	57.944	0	8.3189
1545300000	960110000	1361400000	863670000	1694900000	1441000000	1193400000	1502600000	990380000	1616700000	1627000000	2149100000	1352900000	1318200000	1242300000	2068700000	1467100000	1606800000	1073900000	1560000000	1447600000	1377800000	1284100000	1872900000	1999400000	1758800000	1503600000	1397200000	1473000000	863880000	1330900000	1683800000	1466100000	1753500000	1996800000	1218900000	1816100000	977310000				22	14	14	44.1	26.8	26.8	83.263	0	323.31
33285000	30926000	17088000	50999000	58506000	30409000	33603000	37776000	26105000	12598000	63628000	16387000	33789000	25741000	38291000	29022000	40616000	28947000	30873000	43413000	32618000	31148000	31106000	20784000	19895000	22346000	11932000	12661000	18250000	16272000	11311000	16152000	12240000	19300000	28751000	34941000	23347000	5487300				7	7	7	21.1	21.1	21.1	66.558	0	133.98
7377700	8760800	7399800	11027000	2429200	9039300	3173700	5390200	8888200	5156400	4732400	0	2078200	24803000	4693300	2008600	1814100	0	3218100	0	1768800	0	4610100	5091500	3364500	8562800	1875200	3841700	3371200	3631200	2461400	4248100	3241600	3482400	3844600	4132100	2421400	3019900				3	3	3	11.3	11.3	11.3	54.817	0	16.63
177370000	202650000	153220000	117150000	362260000	192010000	386900000	93932000	171670000	212630000	11998000	165220000	45312000	250510000	111400000	140360000	116340000	93137000	0	96622000	311150000	125530000	11164000	121220000	195900000	160360000	198150000	174930000	214710000	205040000	293340000	179810000	151070000	63782000	121090000	180590000	197870000	81310000				2	2	1	9.6	9.6	6.4	33.845	0.00033693	4.0219
0	0	2513500	0	0	0	0	0	0	5983300	1414400	3064100	0	0	0	4099300	0	7456500	0	3643900	0	0	0	4381200	0	1857600	3251700	0	3011700	0	0	0	0	0	4075600	5790600	0	0				10	1	1	33.2	7.7	7.7	51.985	0.0026057	2.5415
0	11737000	0	0	20302000	5492700	0	0	0	0	4064500	0	3031700	4264600	0	2913700	3779500	6312400	0	0	29583000	0	0	6230500	0	0	9230700	11340000	15040000	13519000	0	11643000	6905100	0	0	0	0	0				2	2	2	1.7	1.7	1.7	167.55	0.001506	2.8279
114260000	174110000	132770000	149520000	246770000	251310000	175760000	61464000	108120000	179940000	322980000	315220000	224470000	206310000	162840000	135440000	173370000	258270000	491340000	472340000	314640000	0	175950000	214590000	248580000	266290000	243280000	376970000	454820000	316940000	252030000	164900000	82593000	417410000	69704000	339810000	36157000	436210000				5	5	5	36.9	36.9	36.9	35.422	0	190.47
29759000	36408000	23639000	32495000	15687000	9698500	13180000	32820000	19045000	17785000	42173000	17153000	20323000	15587000	22827000	24069000	19407000	43211000	16000000	45509000	37337000	96058000	27181000	14722000	17872000	17825000	16693000	13795000	16076000	22509000	19380000	18382000	20763000	25188000	15937000	37409000	31557000	37270000				3	2	2	20	16.4	16.4	25.486	0	9.1871
83668000	108950000	56394000	55389000	68083000	62057000	48744000	53499000	74804000	49071000	27503000	58447000	46289000	50800000	79145000	52082000	65105000	69696000	134560000	110890000	61071000	114970000	69629000	90552000	92071000	129800000	104360000	99918000	120290000	71234000	140260000	126210000	53314000	68346000	115470000	85923000	48848000	59660000				3	3	3	21.1	21.1	21.1	19.79	0.00035063	4.633
214660000	264670000	150550000	238820000	253980000	208990000	229580000	255390000	158450000	161110000	163820000	227580000	238440000	247190000	105960000	141150000	271920000	205480000	135820000	221670000	214470000	207460000	202330000	156980000	146900000	134280000	145360000	150610000	186920000	180170000	176450000	144430000	62378000	147350000	155710000	148520000	176670000	186140000				4	4	4	41.5	41.5	41.5	15.524	0	194.29
15399000	17604000	10501000	11651000	13153000	16837000	16107000	7854400	7103300	18787000	10922000	20481000	26320000	25208000	15205000	25029000	17610000	6485000	19703000	23362000	12948000	26654000	20131000	39872000	30718000	23363000	6593100	3343900	13758000	6639100	6796200	12533000	12756000	15939000	14793000	20155000	14930000	10369000				6	3	3	30.8	20.1	20.1	40.532	0	104.89
1931300000	2465500000	1156400000	3136900000	2053500000	1403500000	1560000000	2901500000	4012900000	1385400000	1173400000	1877600000	2411500000	2252700000	1828400000	858350000	1989100000	551590000	1185400000	1057100000	1152200000	913520000	3043600000	1498500000	701940000	2271400000	860770000	1441800000	1057600000	1298500000	952610000	2514700000	805600000	1000400000	1794300000	1537800000	911250000	1158000000				13	13	12	46.6	46.6	46.6	35.936	0	323.31
13194000000	13176000000	5570300000	45274000000	23865000000	8079000000	6771100000	23619000000	24563000000	10742000000	7450000000	9909700000	20586000000	11993000000	10221000000	2861400000	7799100000	4481400000	18557000000	4988900000	7863700000	4008100000	30185000000	9462900000	3773200000	10965000000	2941100000	14553000000	3866800000	8893800000	3611300000	32564000000	3935900000	3079700000	6116600000	8110900000	6976800000	7330200000				26	26	26	44	44	44	69.691	0	323.31
715350000	873300000	827500000	689820000	686010000	639840000	604910000	776910000	703070000	685610000	804090000	754340000	446980000	1102900000	992650000	725740000	812420000	904650000	981860000	908500000	716210000	754200000	435850000	842840000	729510000	933910000	1136400000	748060000	960530000	798350000	1038800000	973520000	819540000	568280000	727540000	739810000	955400000	757180000				12	12	12	54.2	54.2	54.2	32.928	0	323.31
4422300	6917400	3451400	0	3250300	0	2156100	5876400	0	0	4999000	1090900	0	1769400	9219900	4143700	0	0	4231000	0	0	5154900	0	5533300	6608300	4742300	4869900	5023400	4767600	4887900	4695200	7435700	16080000	3685700	0	0	6820200	6749400				1	1	1	7.1	7.1	7.1	17.254	0.0092474	1.7409
13709000000	8835100000	14848000000	10297000000	16626000000	22316000000	19291000000	11806000000	11187000000	13713000000	15277000000	15624000000	13700000000	20120000000	14542000000	16752000000	14894000000	16277000000	15485000000	17048000000	13942000000	17045000000	10447000000	18036000000	16498000000	13421000000	15404000000	15977000000	17390000000	13745000000	13124000000	9924000000	14190000000	18906000000	13599000000	13565000000	17411000000	18177000000				13	13	9	56	56	41.9	47.268	0	323.31
410810000	312460000	390000000	396250000	233270000	341840000	1047500000	298710000	318980000	286550000	164300000	794460000	566840000	925720000	287820000	475610000	261460000	115910000	399610000	253390000	358220000	200030000	136490000	238020000	173070000	270770000	136270000	231110000	245620000	470990000	465090000	255440000	221030000	319560000	283890000	176020000	230610000	156780000				3	3	3	14.8	14.8	14.8	34.664	0	47.168
14838000	26548000	13130000	10436000	24245000	23941000	15869000	14673000	8434900	17267000	20474000	12367000	0	0	15567000	0	12224000	0	15410000	0	0	7290200	11446000	12943000	19834000	9724100	14794000	12910000	17175000	0	13332000	20082000	11126000	10917000	16092000	14715000	20744000	6950000				3	3	3	35.4	35.4	35.4	16.156	0	7.0278
83330000	179900000	77039000	144680000	145780000	59976000	63356000	93936000	80246000	94141000	114410000	44119000	73663000	57949000	112270000	54693000	64846000	123500000	0	135410000	58542000	0	147870000	68053000	63220000	130640000	102780000	93817000	94465000	104280000	133430000	148850000	91281000	95971000	65080000	106600000	69023000	0				2	2	2	18.9	18.9	18.9	17.394	0	10.157
783110000	1016500000	931830000	971470000	1003900000	716990000	678490000	621310000	631260000	872890000	750850000	438190000	310280000	611380000	609640000	490030000	464590000	966320000	842350000	843770000	527590000	791570000	728170000	576080000	698540000	722480000	751980000	571960000	494770000	571600000	918050000	814150000	513580000	830410000	951320000	799600000	758650000	1288100000				3	3	3	19.1	19.1	19.1	24.917	0	256.43
86228000	236740000	388570000	385410000	137850000	101350000	288250000	109470000	566020000	316210000	255260000	163590000	538150000	162220000	170750000	222190000	228450000	54583000	150150000	36287000	181820000	166930000	105290000	223040000	145930000	259550000	189750000	191450000	162760000	199710000	206780000	236930000	229350000	78918000	193470000	283220000	123500000	59744000				3	3	3	27.4	27.4	27.4	15.85	0	12.799
3392100000	2199200000	2813400000	1201300000	2517400000	2124000000	2404400000	2221500000	2084500000	2159800000	3290800000	2185700000	1770500000	2168000000	1855500000	2463300000	2191100000	2514200000	2877700000	2425100000	2538500000	2404600000	1758400000	2377300000	2900700000	2002600000	2519300000	2181900000	1624500000	1964900000	3459000000	2233200000	2314200000	2280400000	2327500000	2820100000	3484800000	4154500000				12	12	3	56.2	56.2	16.9	40.05	0	323.31
4217200	1970100	0	3960400	1494000	0	0	0	2769400	1650400	0	1111600	3571700	1047600	0	1348200	3917300	3280200	5235600	2396500	0	7137600	2496200	994320	628310	1938800	431590	2207300	3356200	0	0	751880	0	1960900	0	9392100	1742100	2230000				10	1	0	42.9	3.7	0	40.086	0	87.932
196580000	234030000	198750000	152860000	41426000	161740000	233290000	230720000	316410000	163800000	145540000	46104000	240950000	40389000	144010000	101130000	119010000	109500000	181260000	121040000	162040000	119170000	283800000	125870000	135300000	87494000	51699000	146990000	156250000	199040000	118530000	158460000	135470000	160620000	93162000	176270000	77093000	92274000				2	2	2	16.6	16.6	16.6	21.252	0	251.22
75246000	103880000	74782000	104140000	130710000	64485000	50987000	113670000	157360000	63058000	61580000	62097000	70120000	65861000	60406000	37237000	76546000	0	36686000	34718000	48059000	0	95456000	74437000	51766000	89549000	130480000	85241000	51023000	53440000	51175000	105430000	53778000	39466000	68893000	72879000	61251000	38383000				4	3	1	17.3	13.7	5.6	32.865	0	64.553
6269200	5435400	7015900	8458800	0	5868300	6631100	9324700	5730000	5466200	6896700	42680000	0	12725000	9967400	10546000	8995400	0	5576100	8124200	12231000	15243000	5877700	0	0	4664700	10574000	4387800	3924100	0	4879000	0	3218000	7904500	5111000	4523900	13775000	8695000				3	1	1	15.1	6.9	6.9	28.385	0	323.31
26711000	38583000	43097000	37581000	26631000	58750000	58942000	30956000	18955000	38343000	29904000	35853000	44260000	71817000	36207000	56584000	32295000	40542000	40051000	33072000	94806000	84995000	26325000	18746000	35878000	19848000	25088000	30484000	30911000	41122000	14846000	22598000	18564000	33389000	31517000	30825000	28329000	19137000				1	1	1	9.6	9.6	9.6	25.19	0	31.65
3308800000	2673600000	1736300000	10223000000	4069100000	2565400000	1954700000	3612800000	3640800000	2165800000	2447900000	2328400000	3161300000	3071500000	2178200000	1190100000	2194200000	2245500000	3856700000	1443900000	3284200000	2019500000	4764800000	2128600000	1514700000	2292200000	1823400000	3061300000	1452900000	2990900000	2471400000	4454000000	1708100000	1693100000	2000300000	2305900000	2935200000	2383800000				20	20	17	42.7	42.7	36.5	76.967	0	323.31
35286000	76958000	31049000	9863400	9722300	38300000	35899000	10841000	21360000	12796000	4735400	0	2216600	51585000	6741400	16031000	1267000	2206300	0	24240000	2360100	45141000	20202000	16865000	12611000	14920000	17609000	9884800	19426000	0	18568000	0	18948000	8026800	27060000	7470900	11041000	22991000				7	1	1	25.2	5.4	5.4	49.282	0	25.366
353910000	346500000	228880000	222270000	480850000	604550000	458270000	203680000	173410000	232020000	360350000	475820000	193430000	422820000	317460000	380260000	378250000	372100000	415680000	593460000	316750000	781250000	308800000	357390000	320100000	353310000	299910000	307290000	502640000	314780000	519070000	211110000	417130000	476350000	398930000	249960000	461910000	280030000				9	9	3	34.6	34.6	16.7	54.185	0	323.31
886320000	1307900000	1126000000	1487800000	1294300000	899710000	933450000	1347900000	1458000000	1142700000	1749000000	1184900000	765210000	1087900000	857550000	1119100000	1161500000	1033600000	994970000	967440000	1356500000	1132900000	1382000000	993040000	1043800000	1491000000	1407100000	1177000000	1088400000	1231900000	1609400000	1596600000	1168300000	1015100000	1557500000	1205100000	1258300000	913000000				6	6	6	22.1	22.1	22.1	29.386	0	323.31
182110000	138250000	175210000	122950000	129200000	260470000	324560000	187090000	107880000	125820000	297670000	269180000	269690000	268390000	251840000	212910000	182330000	152860000	83196000	171180000	194060000	209740000	114920000	195930000	183230000	176710000	204540000	183530000	248890000	206520000	216910000	164690000	125610000	198560000	119430000	259120000	210530000	180360000				7	7	7	42.7	42.7	42.7	28.415	0	323.31
290270000	227760000	279770000	222420000	285500000	254420000	288730000	233060000	313060000	336210000	320280000	320450000	268910000	244160000	323060000	269290000	227130000	262980000	322000000	225150000	267550000	211070000	271220000	265640000	269430000	312070000	224330000	303110000	206440000	221280000	305240000	261200000	279540000	234920000	319910000	350490000	265100000	294430000				14	14	14	20.7	20.7	20.7	113.08	0	323.31
192700000	146790000	180430000	282490000	330970000	136090000	116880000	222020000	187500000	115670000	187740000	163450000	90968000	105300000	99354000	136050000	199460000	120260000	137610000	150490000	132370000	123380000	269670000	204700000	125440000	143560000	187610000	218200000	155330000	126300000	222160000	176100000	114940000	172990000	108680000	192130000	131910000	241970000				6	6	6	16.7	16.7	16.7	66.851	0	148.33
4918000000	6043900000	7440200000	5783800000	7039300000	7521900000	8316800000	5826200000	5713900000	8661600000	6618600000	9438600000	5729700000	7819500000	7313400000	7549900000	6302000000	8233100000	5826300000	11808000000	10573000000	7968700000	8173900000	8678800000	10852000000	9492200000	13550000000	9036200000	10157000000	12373000000	15080000000	8367200000	9987100000	6788100000	7566200000	6300300000	8351000000	5379100000				10	10	8	36.8	36.8	29.1	39.455	0	323.31
343040000	893070000	1148400000	808600000	1500100000	1023200000	627400000	1635900000	1969500000	841530000	948550000	1906100000	918410000	501780000	1453000000	1308800000	737300000	609440000	2181100000	422160000	487230000	353100000	1552900000	1239100000	1069000000	1026700000	2479700000	1209000000	1137900000	856480000	1614700000	1559900000	923130000	2283900000	904010000	799170000	1252900000	1556200000				3	2	2	42.1	34.2	34.2	12.146	0	242.36
6442700	6571000	4285200	3420100	2097900	5176900	3983800	5926800	8314500	3300200	1142100	4291600	4083500	22449000	7785400	0	5665300	0	0	4605000	2700000	14745000	2729300	5346500	6388100	4106500	9620100	3357600	2451000	6301300	7112000	4297600	10717000	0	2496300	3899500	6339500	5322500				2	2	2	12.4	12.4	12.4	30.288	0.0015133	2.8763
20415000	0	10456000	0	9082700	0	7335500	19593000	0	3395400	0	0	21246000	5136100	8192100	6576100	3995100	11456000	15823000	0	18066000	5186200	0	3448600	6698000	4595300	4260200	7899700	8696700	8362300	11657000	5094300	0	0	0	0	0	0				1	1	1	37.5	37.5	37.5	4.6024	0	6.2016
11445000	25639000	39533000	53179000	61099000	20330000	20409000	28760000	29868000	21396000	0	66966000	34034000	21657000	40278000	27100000	63605000	0	30587000	25964000	26505000	51787000	0	24323000	39318000	35716000	25091000	13006000	21347000	26042000	34285000	42925000	14614000	0	44296000	22773000	20666000	41778000				5	5	5	27.2	27.2	27.2	39.827	0	7.6441
0	0	396220	513030	0	12302000	872930	0	7616000	1005000	0	0	0	0	1253600	0	2138200	0	0	591580	1005700	0	1038300	0	3624300	3488400	0	0	0	2639800	0	0	1533200	4646000	0	0	0	0				2	2	2	4.1	4.1	4.1	90.476	0.0063091	1.9022
27875000	54818000	63954000	29634000	23739000	53648000	60635000	36309000	34348000	66064000	73638000	72805000	62114000	59712000	58789000	68678000	41168000	79715000	52010000	67648000	66822000	60012000	52722000	66651000	42884000	53652000	73206000	40782000	42269000	63023000	42142000	43152000	45670000	68805000	70946000	58850000	45920000	75181000				4	4	4	79	79	79	10.775	0	224.38
3800700	4739100	11277000	0	931880	4156500	0	6406400	0	10864000	0	5472300	0	6235600	0	7129400	0	0	6427400	5416800	0	3587000	7766600	1818000	3249900	2235100	2345500	0	1299100	2677900	0	1766700	3641000	0	7928300	8629900	7891400	8748400	+			1	1	1	2.7	2.7	2.7	61.263	1	-2
1815600	2878300	2606100	1927000	1785800	0	1878900	3232600	1814700	3175300	0	0	2124600	0	1342000	1097500	1397200	0	0	0	0	0	2611200	0	0	0	0	0	0	0	0	0	0	3341100	1125600	0	0	3293800				1	1	1	22.5	22.5	22.5	8.6724	0.0063075	1.9015
0	0	0	0	0	0	0	0	0	0	0	0	0	0	0	0	0	0	0	0	0	0	0	0	0	0	0	0	0	0	9605500	0	0	0	0	0	0	0	+			3	1	1	37.1	10	10	16.445	1	-2
0	3344400	6469900	0	0	8452800	9067300	0	0	0	0	0	0	15281000	0	0	0	0	0	0	0	0	0	0	7629500	2509800	3371400	3014400	4530600	0	4385000	5846100	2165900	0	0	2098200	0	4179500				20	2	2	55.2	8.3	8.3	70.051	0.00064267	3.4475
37310000	44642000	66218000	41462000	178980000	89225000	110990000	63601000	47657000	70062000	253420000	208630000	71314000	105060000	85430000	85119000	67290000	84867000	119490000	59915000	69992000	64723000	53970000	92732000	108320000	172130000	151460000	74226000	116100000	192230000	85811000	160690000	51144000	74350000	50895000	80640000	43812000	90983000				4	4	4	26.7	26.7	26.7	27.872	0	148.98
5948200000	2695900000	4269800000	3640900000	2641700000	3645400000	3839200000	3595000000	2256500000	2998900000	6352600000	9614700000	3076600000	3456900000	3205200000	4986700000	2813500000	4457000000	4675800000	5782200000	3702100000	3845700000	2598600000	3280800000	4903900000	4277700000	3193900000	3833000000	3578800000	5348500000	4031700000	3495800000	2606700000	4512200000	3386900000	2861800000	3340200000	2740600000				7	7	7	70.5	70.5	70.5	16.837	0	323.31
0	0	0	4355500	0	0	1258700	0	1004200	2183200	2185400	0	2414400	0	0	2460300	0	0	0	1729200	0	0	0	0	0	0	0	1386800	1659700	0	0	0	1600600	2851500	2094000	1475700	564000	674100				3	1	1	26.2	6.6	6.6	20.615	0.0030336	2.1835
92842000	136700000	77959000	148240000	186260000	132530000	171320000	126150000	84704000	171780000	93035000	208480000	141030000	143080000	85764000	86736000	111090000	96073000	75603000	80812000	100320000	64358000	101280000	97990000	69882000	145040000	132690000	98508000	104240000	89081000	128540000	97127000	142230000	126600000	85941000	129660000	127350000	136280000				5	5	5	14.3	14.3	14.3	60.67	0	141.88
12510000	14985000	10523000	11890000	5609600	7231600	26495000	2291100	13480000	13984000	19884000	23383000	5038500	19627000	15368000	4292600	13946000	13515000	0	19300000	8800700	14861000	7615000	13190000	13958000	16229000	19570000	13556000	8255800	13176000	12866000	0	16719000	21490000	11860000	7621100	10701000	8019700				9	2	2	39.9	11.4	11.4	50.009	0.00035765	4.9836
28510000	16712000	0	14902000	19795000	25390000	9856900	13235000	28008000	0	20634000	61876000	1536400	0	8314500	11954000	14726000	0	5737800	4561800	9720600	1578400	12895000	16004000	10569000	25975000	66049000	0	19761000	12299000	20441000	23361000	8034700	11984000	18220000	10229000	0	0				3	3	3	22	22	22	23.48	0	52.721
312870000	428890000	614890000	226920000	268140000	455890000	444500000	393850000	291410000	409880000	225370000	433600000	299520000	458500000	421640000	329080000	396010000	561470000	411340000	436500000	459060000	279840000	353320000	480020000	457400000	373130000	418650000	449300000	514450000	474400000	620730000	354760000	629200000	355360000	490050000	317020000	563450000	329220000				7	7	7	15.3	15.3	15.3	68.996	0	63.399
0	0	0	0	0	0	0	0	0	0	8435900	0	0	0	0	0	0	0	0	0	0	0	0	0	0	0	0	0	0	0	0	0	0	0	0	0	0	0				1	1	1	5.2	5.2	5.2	45.119	0	6.2478
3789900	3562900	2795200	1899200	4199200	3698300	5393300	4153900	5660300	2679800	0	0	0	3074800	0	2419500	0	0	2258300	0	0	4049100	0	0	0	3534500	5612300	5216400	6539000	6591900	6194100	4653800	4944400	3752600	3897300	0	3981800	11611000				7	4	4	6.4	4.3	4.3	211.68	0.00034176	4.1958
73757000	117060000	64129000	141710000	85183000	129590000	72629000	54647000	87285000	85322000	105890000	166750000	0	187060000	67344000	126100000	58781000	0	90902000	124720000	79426000	150900000	97967000	36525000	50415000	0	0	75775000	0	0	120410000	60223000	34475000	72121000	28901000	58885000	113380000	49428000				3	3	1	8.7	8.7	2.4	78.927	0	31.048
0	0	0	0	0	0	83035000	0	0	0	0	0	0	0	0	0	0	0	0	0	0	0	0	0	0	94842000	0	0	0	0	0	0	0	0	0	0	0	0	+			3	1	1	19	3.8	3.8	32.944	1	-2
5696600000	3884300000	4828600000	5065800000	6378400000	4561300000	3574800000	4899100000	3678000000	4703500000	4342400000	5794400000	6571900000	3912100000	3137900000	2971600000	4005600000	3170000000	2530100000	2292300000	4364600000	3796800000	5797500000	4879500000	3600700000	3859700000	3960400000	3373600000	3424700000	3889000000	3572200000	5610200000	5521900000	4286200000	3655900000	3497200000	5565500000	4642200000				8	8	2	55.4	55.4	10.2	18.518	0	323.31
371950000	358730000	790100000	153060000	453090000	421360000	201480000	288870000	231340000	1149000000	431270000	675110000	322650000	406090000	404480000	566790000	212890000	747400000	315660000	423530000	291280000	399650000	280890000	411880000	588590000	402380000	1009900000	397940000	367390000	385510000	524070000	377630000	1070200000	522150000	657530000	429130000	755670000	884590000				3	3	3	3.2	3.2	3.2	135.36	0	36.692
1917800	1086400	1733600	1415700	0	0	0	1419000	1556300	1558200	0	1158000	419850	0	0	2369800	913670	0	0	0	0	0	1552500	1970700	1454900	1217400	0	0	0	609500	0	1284200	1635100	2039800	749760	2854600	1240600	819970	+			1	1	1	6.7	6.7	6.7	22.904	1	-2
712460000	730830000	483540000	1161800000	572990000	540890000	565080000	517600000	771470000	521540000	555140000	832880000	855660000	752610000	672590000	486360000	569830000	560500000	757120000	791150000	701600000	649160000	1024500000	760790000	504620000	457640000	606250000	644840000	782280000	610430000	628860000	763560000	568210000	692980000	663240000	590160000	532150000	619300000				15	15	15	57.9	57.9	57.9	49.023	0	323.31
1976200000	2288400000	2420100000	1467100000	2191900000	2026100000	2234500000	1644900000	1895500000	1768800000	2099800000	2431600000	1627500000	2121800000	1979300000	2138800000	1721700000	2983800000	2406400000	2441400000	2466500000	2385900000	1894800000	1842700000	2171400000	1629900000	1895400000	1775100000	1951000000	1921900000	1934200000	1809800000	2299700000	3202400000	1894300000	2883900000	2166600000	2651400000				22	22	22	50.1	50.1	50.1	61.054	0	323.31
3647600000	4567600000	3140600000	4505000000	4054500000	2511900000	2591700000	4078200000	4142500000	3317000000	3586300000	2984100000	3448300000	2544600000	3165200000	3110500000	3728100000	3078500000	3422800000	3518600000	3183300000	2919500000	3716600000	4036800000	3882200000	4719600000	3871700000	4145700000	2961000000	3762300000	3573400000	4541900000	3092600000	1691300000	2929800000	3883300000	3085600000	3970900000				19	18	18	41.1	41.1	41.1	72.332	0	323.31
77840000	60092000	43035000	148730000	79466000	44529000	46206000	74153000	53006000	37998000	37498000	65834000	37508000	51478000	43862000	38157000	70238000	65742000	95113000	36551000	76571000	42208000	56817000	81557000	42029000	70079000	58069000	39378000	38754000	88123000	56296000	74394000	45111000	56252000	34221000	91348000	41835000	38071000				11	11	11	10.1	10.1	10.1	177.6	0	46.621
321630000	245520000	195650000	213650000	209950000	0	0	20088000	217170000	281280000	163140000	168460000	142980000	446300000	186530000	186350000	258170000	407340000	578580000	302210000	233290000	356420000	192320000	175070000	169540000	245250000	536690000	255740000	497600000	321970000	472500000	282670000	252100000	176080000	141470000	205760000	253910000	214550000				3	3	3	7.8	7.8	7.8	48.344	0.00033322	3.887
492200000	442450000	507340000	278860000	458570000	270240000	205200000	589800000	386120000	453530000	437640000	325840000	214510000	301290000	494550000	501020000	367110000	479490000	540950000	705670000	555500000	306140000	271580000	432580000	457770000	301930000	359060000	435910000	355440000	400740000	320530000	327120000	491390000	547010000	349080000	480200000	355160000	672980000				14	14	14	15	15	15	199.08	0	323.31
11822000000	11630000000	13182000000	13068000000	15333000000	11475000000	10062000000	9907500000	10965000000	11360000000	11299000000	8873900000	10316000000	11259000000	14323000000	13815000000	11639000000	14560000000	11614000000	14348000000	12883000000	9872000000	10276000000	12476000000	13587000000	13923000000	14106000000	12559000000	11923000000	13494000000	12683000000	11718000000	12554000000	11380000000	11759000000	13591000000	14213000000	10956000000				25	25	16	62.2	62.2	45.4	70.897	0	323.31
2056500000	2546900000	2791300000	1971900000	1576200000	1986500000	1413700000	1210900000	1702700000	2198000000	1795800000	1708000000	1676700000	1945000000	2176200000	2057600000	1366800000	2393100000	1837800000	1453400000	2073000000	2261700000	2289300000	1865500000	2453000000	2046300000	2623700000	2553900000	2493400000	1887800000	2984700000	1816500000	2941300000	2042800000	1712400000	1385900000	2623000000	2906800000				8	8	8	22.2	22.2	22.2	54.035	0	167.4
27493000	18772000	29398000	25222000	24531000	19961000	0	17823000	14907000	18229000	14532000	0	33085000	4975700	18345000	16301000	14483000	0	9795400	15350000	6173400	63042000	0	11259000	11350000	31499000	106510000	8357200	9878500	9834100	29654000	24264000	24581000	46432000	22784000	3658900	40399000	12548000				3	3	3	11.1	11.1	11.1	53.924	0	6.7457
22291000	8837700	17491000	3157000	3825900	9020200	6042100	27257000	8746600	4545700	0	0	6024300	0	3375700	5358500	5946100	23345000	0	0	11389000	15445000	6313800	9025200	8465300	5421600	0	5033600	3666000	4949600	23610000	8576300	12127000	7073800	5566400	4526700	17365000	0				3	1	1	6.9	2.8	2.8	63.254	0.0023454	2.6136
11938000	14771000	13758000	18153000	3747500	17244000	10597000	16307000	15596000	11041000	23027000	10299000	8504300	14578000	12577000	6835700	11000000	0	0	0	8345600	12246000	8503000	20722000	18610000	22014000	32199000	18848000	16961000	16129000	19915000	24602000	10273000	8687000	8117700	10181000	14008000	17908000				2	2	2	12.3	12.3	12.3	33.051	0.0023585	2.6609
22748000	190070000	104650000	59424000	88355000	157810000	158190000	51413000	147640000	313880000	71042000	228770000	95844000	154790000	177690000	65299000	146750000	126620000	76951000	204360000	261770000	73086000	59187000	186380000	251520000	252230000	198690000	271730000	300570000	293540000	386230000	104580000	195010000	123590000	182230000	47166000	246780000	82219000				5	5	5	17.3	17.3	17.3	37.514	0	70.861
1040100000	824370000	924050000	626760000	640290000	566370000	390540000	790560000	946750000	660740000	793060000	741350000	489020000	554990000	745090000	654650000	516790000	570490000	854060000	583490000	829740000	438830000	379510000	850730000	1057500000	903500000	1126000000	664980000	681640000	785630000	881410000	707280000	656550000	652620000	663290000	807990000	904360000	1050200000				15	15	11	25.6	25.6	19.6	96.695	0	323.31
0	116430000	267550000	0	11774000	0	70635000	0	347850000	0	0	0	90044000	95745000	1883900	6028900	66958000	0	868350	44785000	0	0	0	126880000	0	85755000	0	103730000	50235000	38931000	54387000	93052000	108200000	0	50035000	38839000	0	0				5	1	1	8.3	2.3	2.3	97.091	0.005339	2.0003
64330000	0	0	0	37681000	13481000	58870000	96373000	59255000	89609000	158380000	28414000	21516000	33997000	39398000	50872000	11086000	0	0	0	0	0	0	48747000	51622000	47796000	41858000	40036000	36300000	84982000	57967000	74417000	54892000	158860000	180960000	114240000	0	0				5	1	1	33	7.3	7.3	23.567	0	22.376
77133000	68528000	79428000	50757000	119380000	80640000	97311000	46483000	71323000	59229000	69365000	76889000	93471000	86664000	97581000	133670000	110020000	143660000	85960000	130730000	136950000	60167000	138650000	63004000	39753000	15758000	19635000	81516000	80629000	50980000	47855000	55894000	102360000	83062000	79738000	101970000	84634000	46272000				6	6	2	39.3	39.3	13.6	23.408	0	323.31
7767800	11738000	12090000	0	13019000	12608000	7716400	12959000	7628400	806440	0	14286000	0	6543700	0	10492000	0	0	0	7129800	0	9130400	0	11121000	0	14480000	10039000	5090900	9408900	11539000	9829900	15318000	7843600	14423000	3562800	7123100	4100500	0				4	3	3	5.2	4.4	4.4	137.73	0	13.232
10093000	23402000	39252000	17381000	24460000	24129000	9842400	17611000	25431000	16341000	26770000	54708000	5635000	20422000	37415000	20095000	11471000	37934000	0	15463000	44582000	20279000	19734000	31661000	23016000	20468000	29146000	22698000	40038000	26940000	28559000	16114000	18207000	23516000	23247000	6046300	26702000	33526000				11	9	9	7.3	6.4	6.4	242.8	0	42.62
7490000	22446000	12136000	8301700	17737000	11639000	18607000	20225000	22870000	26313000	4561900	5185200	14072000	11097000	35747000	5026800	6758300	0	28479000	0	32641000	18247000	7164700	24402000	16286000	19017000	13173000	5492500	14500000	4104800	14719000	15074000	14530000	16389000	26844000	20987000	7221100	12818000				6	6	6	10.3	10.3	10.3	90.725	0	9.2887
0	0	0	1419200	1768100	0	1543800	0	1516500	0	7611600	0	1575900	0	833860	0	0	0	0	2394700	1956900	2574500	0	1785900	1242400	0	0	0	3959400	2587900	0	883610	3383200	0	2626000	3010400	537180	0				6	1	1	4.3	0.7	0.7	174.38	0.0026254	2.5714
136620000	256940000	179500000	254300000	102720000	142780000	119560000	134280000	184320000	160540000	114110000	113430000	148460000	204000000	232880000	18857000	113330000	11380000	89944000	261720000	107850000	78577000	25451000	137440000	117910000	157920000	169170000	66883000	93475000	100140000	110600000	149160000	149980000	102200000	147540000	119820000	73524000	116090000				6	6	6	13.8	13.8	13.8	59.256	0	68.542
3065900000	2173200000	3138100000	1369600000	3600200000	3938900000	4489400000	1809000000	2157800000	4577800000	7129700000	4238600000	2774500000	3930200000	3235600000	3199100000	2823100000	3818100000	5582600000	5371300000	5365000000	4241400000	2271200000	3306600000	3580900000	3157600000	3981800000	3796100000	3442000000	3118800000	4250100000	1808700000	3460400000	4309900000	5335500000	5023300000	4839500000	5871600000				11	10	9	50.3	47.1	43.7	40.04	0	323.31
335960000	377960000	309690000	284050000	220020000	282140000	350110000	374370000	368290000	307040000	448410000	340440000	254560000	413770000	234870000	284730000	314740000	214920000	299400000	325970000	312250000	398480000	280280000	244170000	346800000	233280000	381210000	230320000	261320000	259930000	295180000	314640000	276220000	302780000	250030000	431140000	342910000	366590000				17	17	17	25	25	25	129.63	0	323.31
0	0	0	0	0	0	0	0	0	0	0	0	0	0	0	0	0	0	0	0	0	0	0	6188900	6372500	5992000	0	5896000	0	0	0	0	0	0	0	0	0	0	+			1	1	1	5.5	5.5	5.5	56.501	1	-2
164010000	134500000	79555000	133450000	150580000	98489000	79013000	161990000	166520000	68553000	128890000	63328000	98968000	69701000	83049000	51307000	119630000	123070000	21257000	63865000	106450000	90808000	108740000	120150000	8476500	196300000	125210000	59791000	60023000	109930000	124590000	132370000	89774000	62318000	76832000	58359000	69019000	59085000				9	9	9	17.1	17.1	17.1	101.56	0	14.571
948300000	648020000	609620000	577100000	679580000	730510000	628870000	744030000	481940000	595020000	765690000	668030000	680110000	692350000	615420000	693480000	476280000	501670000	506800000	651470000	593960000	587150000	664620000	489880000	492880000	478580000	461390000	504330000	449860000	421700000	518790000	610280000	621830000	689560000	585550000	570530000	641890000	715730000				23	23	23	37.8	37.8	37.8	109.72	0	323.31
5276200000	3368400000	5273300000	4759700000	7192500000	4730900000	4867500000	3292500000	4009000000	5915500000	5115900000	6013200000	4080800000	6019800000	4353300000	6053200000	6412600000	5780200000	4798400000	6445300000	5604000000	4588500000	4024500000	4765200000	6159200000	5192800000	4950400000	4842200000	5570900000	4660200000	6973800000	5658900000	5014800000	4656100000	4944500000	4274400000	4864700000	4621700000				11	11	11	61.1	61.1	61.1	36.454	0	323.31
410470000	417260000	237500000	120270000	355410000	201380000	134340000	459420000	327770000	257410000	66328000	223290000	467650000	169440000	259970000	278860000	335490000	189400000	279200000	310850000	276180000	350610000	184740000	332800000	289840000	446640000	504380000	380600000	321270000	351000000	319310000	416090000	236670000	576650000	256470000	229600000	261060000	217000000				3	3	3	12.8	12.8	12.8	39.724	0	14.981
6597000	14395000	0	0	0	0	0	9775000	20613000	0	0	8962800	0	0	0	3705300	0	0	0	0	21607000	7160900	0	0	5138200	11625000	6086600	0	6599000	13193000	9586600	0	8065600	4226400	5498300	1844600	5820900	9022100				6	1	1	31.8	6.3	6.3	34.769	0	30.702
273910000	277020000	366700000	270070000	290200000	308170000	280230000	292070000	292820000	306500000	381660000	442430000	319930000	264790000	297720000	284450000	272410000	292450000	237340000	374560000	267700000	387650000	273920000	322420000	268110000	320600000	241850000	258310000	290160000	253490000	351910000	289470000	263100000	363910000	322000000	264890000	291490000	340530000				11	11	5	31.4	31.4	16.7	70.67	0	323.31
13713000	0	6801600	5360300	11199000	25845000	18743000	0	0	7050800	35037000	31174000	32932000	21381000	16448000	17805000	24732000	26382000	13223000	14209000	25581000	12930000	6138700	14203000	0	12561000	12693000	13467000	27046000	18138000	13769000	11193000	11790000	18923000	20832000	4678900	10259000	6792900				3	3	3	24.1	24.1	24.1	28.768	0	15.802
7685100000	8772100000	3436000000	8452700000	8408500000	7656500000	6435600000	6047400000	6918700000	5959300000	7003100000	9202700000	7119400000	3422500000	6361100000	5836700000	7520400000	3449600000	8602200000	3979900000	9401800000	8534000000	6019700000	6424900000	7788500000	10125000000	10111000000	6218900000	5046300000	8854900000	6113800000	8338800000	3846500000	4020200000	12045000000	8117200000	5319600000	3119400000				3	3	3	48.3	48.3	48.3	9.8962	0	74.721
52817000	97633000	182280000	0	72978000	108390000	460250000	127550000	136010000	218170000	233500000	215190000	100100000	368510000	128930000	172480000	175770000	349530000	464430000	261920000	264930000	272020000	219500000	224640000	312070000	245370000	1385100000	533760000	395440000	292020000	226700000	208440000	175430000	145750000	177980000	326510000	249740000	307240000				5	3	3	7.6	5.5	5.5	105.64	0	34.816
14844000	12806000	0	63087000	10827000	0	0	20420000	16322000	16463000	10408000	28614000	15007000	0	0	0	0	0	4875500	11605000	12543000	5593100	15303000	12155000	0	12025000	0	14283000	6543300	7378100	6314200	15816000	0	14921000	20359000	12605000	17153000	19398000				3	3	3	32.4	32.4	32.4	16.711	0	9.4209
91376000	84094000	85167000	74520000	101940000	100670000	50744000	94613000	92973000	83852000	37691000	97056000	71667000	61880000	69249000	76459000	55629000	79947000	45976000	33951000	68320000	38075000	56132000	89000000	69338000	81958000	72833000	67344000	72709000	52625000	67724000	88974000	76880000	86957000	85403000	95056000	68063000	61793000				10	10	6	27.8	27.8	19.8	54.846	0	43.648
0	0	0	2388000	0	0	0	2951800	0	0	0	0	0	0	0	0	0	0	0	0	0	0	0	0	0	0	0	0	0	0	0	0	0	2184200	0	0	1812800	0				1	1	1	0.8	0.8	0.8	278.2	0.0028417	2.4048
103350000	108540000	108350000	137710000	228960000	112290000	3174800	170940000	100960000	129960000	110170000	391430000	265200000	208520000	60459000	33130000	71308000	35905000	53172000	71002000	79291000	0	29936000	117420000	251040000	108940000	149850000	112480000	129460000	278250000	173090000	146940000	161660000	149820000	105410000	50794000	304690000	54665000				9	2	2	35.9	6	6	33.064	0.00035051	4.6274
4023700000	3877400000	6495900000	2981400000	3109400000	3619900000	3370500000	3433100000	4578800000	4702200000	7059600000	4975600000	2353400000	5056200000	4053400000	4737900000	2428100000	2742600000	5176400000	2824700000	3978300000	4070700000	3389800000	4780900000	5929000000	4110600000	4827000000	4321700000	5017300000	6218900000	5020300000	3709800000	5618100000	7392000000	5664700000	3341600000	4599900000	4608200000				12	12	0	43	43	0	32.866	0	323.31
119800000	127420000	163790000	228680000	187580000	117560000	151400000	104410000	93611000	129180000	83606000	124880000	94132000	100110000	91098000	86334000	105080000	134170000	106790000	151810000	75562000	99203000	158690000	120250000	108170000	131380000	116770000	153740000	114710000	102800000	93461000	92220000	131060000	132940000	145750000	143620000	133410000	211750000				7	7	7	21	21	21	55.804	0	37.771
146260000	162230000	150960000	110780000	185830000	121180000	109380000	167460000	165990000	147500000	142290000	132910000	102580000	74862000	112020000	113700000	128950000	266660000	205870000	123330000	115110000	152130000	157720000	125240000	122180000	114150000	133040000	123650000	93798000	123210000	100170000	119660000	153500000	169140000	123050000	156640000	112920000	135740000				17	17	17	9.9	9.9	9.9	267.29	0	288.28
3332600000	2001200000	2277900000	2631000000	3335400000	1985800000	3193500000	2367800000	1718700000	2726500000	3571700000	2420300000	2681100000	1350300000	3940200000	1903800000	1658200000	1561500000	3474500000	2383200000	2752900000	2332200000	2451200000	2122800000	2202000000	1955600000	1441900000	1896700000	1935100000	1539800000	1757900000	1830400000	2830000000	2771100000	2179700000	2078900000	3020600000	2203700000				4	4	4	14.5	14.5	14.5	36.474	0	323.31
15833000	18457000	18181000	18908000	12981000	46164000	154710000	20431000	25618000	11026000	23253000	11942000	23753000	41495000	21974000	33277000	0	1646200	38042000	15735000	19142000	39806000	0	3811000	3561300	8076000	14171000	20513000	18144000	3160000	23398000	4904800	11924000	17725000	19817000	27456000	13974000	12145000				12	1	1	44.4	6.6	6.6	42.644	0	101.63
159840000	173810000	167970000	375960000	556940000	122540000	28831000	252050000	207330000	87378000	362470000	172230000	240120000	128620000	257340000	174110000	230950000	0	145050000	72620000	142400000	146830000	503800000	171870000	96511000	168410000	459670000	125260000	74966000	53220000	76853000	242810000	45008000	61225000	187830000	266160000	172400000	39705000				3	3	3	38.7	38.7	38.7	11.828	0	219.89
7581200	36188000	24051000	17563000	18161000	0	5281400	25168000	109510000	39480000	4396000	18101000	9826100	10260000	10393000	17035000	12774000	8276500	0	9530100	12182000	5137500	14888000	14288000	9765900	18104000	13498000	15434000	11676000	12107000	18946000	19195000	22282000	0	22386000	11001000	13769000	626460				1	1	1	2.8	2.8	2.8	36.375	0.00064475	3.4717
1445200000	785160000	2117100000	883870000	2960700000	1443700000	765510000	1089900000	703740000	2104600000	2288200000	1352400000	2124000000	646130000	942830000	2193400000	1582700000	1934100000	0	0	1876000000	0	960580000	1524600000	3002100000	1710800000	2507000000	1931400000	3036500000	2288100000	2234200000	1427900000	1615400000	2931000000	2017500000	2570500000	2205700000	1883400000				10	1	1	35.7	2.9	2.9	47.036	0	11.378
620090000	264280000	933130000	94856000	149030000	629190000	417530000	347310000	265730000	1138300000	242080000	285390000	217000000	356670000	411350000	868600000	272480000	0	189170000	239650000	214550000	233190000	173720000	622870000	590810000	366000000	502010000	198180000	330860000	347430000	360670000	223160000	221560000	720950000	317270000	325420000	344960000	949740000				1	1	1	44	44	44	2.8132	0.0026209	2.5677
19036000	27015000	34123000	34164000	27062000	33623000	24050000	15551000	47082000	27518000	21541000	22860000	53970000	22424000	16703000	55524000	56164000	0	6107900	0	49997000	54377000	35847000	25896000	22300000	25420000	14874000	15259000	13664000	46425000	21500000	54295000	40737000	0	27812000	18492000	0	26164000				5	5	5	19.2	19.2	19.2	77.123	0	38.15
20566000	8604100	15275000	14422000	21281000	29976000	10581000	14523000	12213000	24444000	17733000	21227000	13231000	8665100	15492000	22312000	14882000	18421000	0	17610000	39453000	29000000	19706000	25680000	17658000	19362000	24309000	13570000	0	20215000	30948000	16567000	17653000	14920000	0	13563000	20407000	19791000				4	4	4	18.4	18.4	18.4	50.47	0	39.353
171620000	183840000	120270000	417120000	351300000	141960000	177550000	157940000	158280000	230200000	197440000	237600000	251540000	179770000	209780000	125050000	239510000	102040000	246400000	143140000	196060000	146710000	220450000	191480000	113530000	188450000	75660000	144310000	125660000	176050000	118650000	160770000	109160000	98217000	200070000	148760000	114610000	147380000				29	19	19	49.9	38	38	103.06	0	323.31
12185000	16237000	12192000	16533000	8888300	16187000	17740000	13096000	8751800	11235000	9765400	0	14286000	18283000	13075000	17334000	8665000	0	15948000	16581000	0	11581000	6754000	11659000	15341000	16018000	9234100	10372000	9434200	7386300	18397000	10271000	10504000	13665000	17112000	21899000	15802000	13915000				5	4	4	15.1	13.6	13.6	59.834	0	198.88
42795000	67985000	110340000	98781000	51967000	45660000	34435000	45078000	63998000	67686000	105980000	46345000	52427000	30783000	39756000	34179000	46600000	29803000	25486000	30537000	36389000	34412000	50486000	36252000	29360000	49006000	28793000	34140000	33832000	48912000	25991000	72619000	41501000	118920000	42790000	65236000	27123000	57664000				2	2	2	5.8	5.8	5.8	47.261	0	83.659
0	4469400	0	6125400	3017300	4791100	0	3758600	0	0	7109600	4458300	6908400	2487100	7559800	3847900	3564400	0	0	2561400	0	5780900	3323100	0	0	0	0	0	931580	1802200	0	0	5967100	7192300	2133700	2639800	6356900	5229900				1	1	1	3.6	3.6	3.6	82.704	0	7.9211
6210800	4972800	0	6909300	0	5418900	0	2672000	0	13793000	9321700	29415000	4796500	7488100	2896200	5222800	0	0	5014400	0	0	0	12987000	6208800	0	5644900	9704800	2535100	0	6324700	5420900	0	0	0	0	2943400	3185800	2662900				2	2	2	5.3	5.3	5.3	71.73	0.00062228	3.1562
4013700	9658400	17285000	9914200	8330500	6902900	3811000	0	54331000	7633000	9069100	3747100	19843000	7600800	10688000	0	16613000	0	0	9626500	11573000	0	19993000	0	1639000	6131700	4874100	6748200	0	2280300	4924800	2883300	13083000	3088900	5008600	14025000	3276000	2445900				1	1	1	2.2	2.2	2.2	44.955	0.0070496	1.8562
736750000	998340000	1115700000	768420000	1374700000	1241600000	1202400000	1097000000	876440000	1056000000	1242400000	1104200000	1423000000	948200000	989660000	1138300000	976450000	1446800000	876820000	932320000	928800000	1164800000	961900000	1242000000	1631200000	1595300000	1169800000	1169300000	1265100000	1491700000	2091400000	1900700000	1078000000	1433100000	1064200000	885820000	1066400000	1781700000				6	6	6	14.5	14.5	14.5	80.311	0	177.74
0	2143400	0	6808800	1861800	721910	5736400	5527500	2001100	29628000	4194100	14541000	7482100	11637000	3910800	11191000	0	0	0	0	0	0	3408200	0	3863700	4477700	3675100	0	6226200	1868500	1607900	2950400	4659800	34761000	806420	5547900	8612000	0				1	1	1	1	1	1	265.05	0.00032808	3.6568
337140000	89886000	362290000	161370000	306740000	517240000	400340000	227600000	300390000	239870000	301070000	678060000	297710000	688970000	338930000	248150000	248890000	706450000	303360000	498540000	407750000	216910000	204050000	405410000	619180000	421500000	536260000	266360000	374730000	357010000	848070000	300750000	329500000	733980000	323440000	172710000	475080000	125080000				5	5	5	63.2	63.2	63.2	8.9299	0	29.202
8506800000	6544800000	9127000000	6248400000	9450900000	10961000000	10497000000	6908600000	7926600000	11048000000	14586000000	7640300000	8812600000	12796000000	8570000000	10440000000	9172600000	12216000000	12609000000	11325000000	12501000000	11271000000	6712100000	8921200000	11977000000	9337500000	13122000000	9704200000	10631000000	10202000000	12383000000	7868400000	9348100000	10110000000	10215000000	13341000000	11228000000	12007000000				24	24	14	39.2	39.2	25.3	111.75	0	323.31
1547800000	1710800000	1514700000	1935400000	1390800000	1261200000	1387300000	1734600000	1605800000	1321600000	1729300000	1481000000	1917200000	1666800000	1572800000	1392100000	1496600000	1327100000	1544700000	1521600000	1446000000	1331900000	2072700000	1381600000	1319200000	1409300000	1007200000	1239900000	1051300000	1257900000	1160400000	1494000000	1230200000	1573700000	1368000000	1769300000	1374600000	1438100000				24	24	24	38.1	38.1	38.1	95.337	0	323.31
152860000	212030000	69868000	73538000	158220000	129240000	62662000	149110000	181180000	126920000	76746000	131250000	124780000	93384000	145070000	111490000	127910000	97760000	128970000	103240000	106600000	108180000	164570000	113000000	132670000	180800000	111260000	105770000	116700000	149810000	132640000	233310000	93962000	74617000	87975000	103990000	87812000	106390000				3	3	3	6.4	6.4	6.4	72.932	0	42.585
163150000	83254000	38056000	87966000	108040000	103730000	115820000	72358000	94799000	68043000	56633000	122650000	89812000	129040000	110870000	102300000	138030000	138640000	109130000	133300000	122610000	91798000	118910000	82875000	82223000	91427000	79314000	93438000	90983000	75339000	100250000	66204000	76314000	110150000	62464000	59908000	111650000	66298000				8	8	8	30.1	30.1	30.1	61.049	0	67.968
97559000	165560000	133610000	139750000	89748000	62664000	53606000	97012000	63227000	100440000	110100000	179410000	103470000	78594000	115870000	63613000	66245000	149490000	71463000	171540000	68313000	57184000	85161000	81134000	82475000	89465000	92123000	61243000	66431000	112240000	123680000	80259000	95119000	146420000	119900000	111660000	81144000	80615000				3	3	3	28.5	28.5	28.5	19.595	0	7.1671
19454000	43487000	74244000	62443000	19747000	51512000	0	65080000	54008000	79135000	15450000	9362000	50101000	10805000	32647000	38359000	29815000	0	58293000	0	32296000	32189000	59647000	69201000	52748000	66302000	31080000	85026000	51775000	63797000	54947000	70658000	78537000	14451000	64772000	17806000	85487000	0				5	5	5	20	20	20	36.294	0	5.6646
138420000	146350000	80339000	255590000	136350000	107150000	61131000	222650000	173440000	76275000	14223000	74314000	95488000	103430000	203490000	32428000	191540000	0	18506000	12129000	89033000	14048000	146850000	119270000	35438000	165130000	14924000	47586000	26859000	63955000	21411000	172080000	15520000	27213000	81444000	166500000	41562000	67099000				11	8	8	26.5	21.5	21.5	70.288	0	38.251
146640000	112500000	48230000	131530000	134090000	67469000	70979000	154540000	175360000	114060000	16173000	118340000	173410000	185510000	149670000	107230000	140330000	34078000	112170000	85422000	108680000	66585000	167690000	164480000	113450000	228640000	162720000	105410000	103430000	96616000	114990000	187310000	50324000	72130000	86486000	127140000	73527000	105500000				14	14	10	33.3	33.3	26.2	70.81	0	182.69
0	0	0	0	0	0	0	0	0	0	0	0	0	0	0	0	0	0	0	0	0	0	0	0	0	0	0	0	0	0	0	0	0	0	0	0	4899700	0	+			6	1	1	15.2	3.8	3.8	81.224	1	-2
502300000	471130000	472610000	324550000	420700000	478180000	471760000	415910000	259780000	280940000	697420000	529310000	554180000	605130000	688940000	581190000	335480000	1219500000	766900000	624140000	734040000	538420000	308610000	457760000	626730000	284950000	372010000	395590000	403610000	406140000	447350000	96272000	502960000	424380000	687050000	567600000	364740000	448380000				6	6	6	29.7	29.7	29.7	35.079	0	267.24
28299000	28864000	23134000	24515000	12237000	44926000	24287000	24755000	27178000	37939000	14622000	34785000	47510000	42367000	22996000	5981600	33139000	16387000	21701000	0	0	22219000	35269000	31144000	23558000	24134000	23596000	26464000	26479000	27054000	28550000	44409000	21203000	45482000	21308000	23774000	36910000	22234000				7	7	7	17.1	17.1	17.1	83.785	0	15.103
1139400000	857710000	860660000	735060000	947320000	626210000	1065700000	697280000	811600000	862180000	845760000	627700000	920330000	963930000	877130000	808000000	972000000	1102500000	654220000	1412600000	794050000	1080400000	690010000	716280000	847720000	786650000	916120000	900920000	810730000	775570000	986430000	826620000	986300000	1033600000	849620000	1180800000	1113000000	1162500000				10	10	8	33.8	33.8	26.2	43.066	0	323.31
0	0	0	0	0	0	0	0	0	0	0	0	0	0	0	0	0	0	0	0	0	0	0	0	0	0	0	0	0	0	0	6860100	0	0	0	0	0	0	+			8	1	1	37.1	7.7	7.7	42.248	1	-2
13336000	10032000	11668000	0	0	2545700	2937700	9114100	0	4686600	0	2049400	4601400	0	0	0	0	7400600	0	0	0	0	0	0	0	0	0	0	0	0	0	0	6129600	3960700	15367000	0	6596300	0				1	1	1	4	4	4	28.38	0.0030908	2.3043
15609000000	10135000000	8232600000	13196000000	15648000000	4360800000	3492300000	11160000000	13713000000	4243800000	7507000000	6506700000	5957700000	5583800000	9396900000	3467400000	9597100000	2629500000	8003500000	6700500000	7661700000	2079200000	6785600000	8094800000	5277200000	7920300000	4118800000	6847800000	5393700000	10381000000	4552300000	18231000000	3300300000	1831200000	9014500000	1426400000	3499900000	4514200000				6	6	6	13.4	13.4	13.4	49.88	0	163.83
155460000	133760000	58100000	153320000	379810000	163740000	98542000	111050000	148080000	126860000	121840000	106950000	225930000	120700000	92587000	29660000	89971000	48697000	184910000	0	209840000	72795000	221990000	64978000	33977000	134890000	35523000	121400000	29109000	147720000	58073000	203870000	58981000	53663000	101090000	165190000	64675000	129890000				4	4	4	23.1	23.1	23.1	33.668	0	101.26
47333000	81540000	64397000	81393000	46783000	0	42080000	67417000	75648000	77653000	76565000	90388000	42009000	48585000	57695000	30986000	37309000	25160000	46627000	46285000	67828000	62432000	49364000	47896000	55435000	38496000	101600000	80828000	45945000	66145000	41692000	59493000	46458000	83186000	0	0	47454000	72748000				2	2	2	5.5	5.5	5.5	59.177	0	26.66
0	21534000	32129000	0	0	15027000	0	31829000	12928000	22884000	21041000	32667000	17143000	14572000	23188000	20669000	14991000	0	32896000	18174000	19905000	20727000	17941000	0	21811000	15728000	28042000	14858000	22230000	24403000	29488000	23447000	0	32260000	26107000	15992000	21676000	14375000				1	1	1	3.1	3.1	3.1	40.532	0.0026239	2.5698
98704000	52551000	84179000	93788000	47626000	116050000	61370000	99623000	116460000	86548000	56430000	100920000	118200000	67356000	85806000	61617000	129330000	0	96624000	80045000	75689000	83181000	185550000	84712000	22190000	101700000	76138000	94646000	127170000	64137000	58225000	63913000	49895000	73498000	70241000	73497000	41886000	71715000				6	5	5	37.2	28	28	27.805	0	86.875
43982000	69745000	0	56382000	17220000	86065000	26720000	9353700	89241000	21344000	39444000	81271000	29901000	86411000	65625000	54124000	69180000	109800000	44782000	60568000	117180000	0	75735000	51303000	51758000	50085000	42502000	19939000	46038000	54543000	20779000	70823000	7989900	27883000	42318000	165240000	20317000	80559000				2	2	2	10	10	10	33.367	0	114.68
6033200	0	4288900	4150800	1690400	1749700	1667800	13474000	975630	2359800	2270500	13093000	0	659290	0	2316800	2411200	0	0	0	0	0	0	785380	3387800	0	0	0	0	0	3914000	4477900	0	1169600	0	1741500	3563800	652930	+			6	1	1	26.2	3.7	3.7	36.573	1	-2
457980000	1637000000	974140000	1580600000	281430000	458260000	327460000	779700000	1901100000	1145300000	614570000	1107100000	448960000	676430000	734970000	1155600000	921100000	341480000	823560000	612970000	1094200000	966540000	1048000000	2040500000	709650000	615950000	1732200000	910190000	1544200000	1373200000	508690000	508460000	1028600000	985370000	891600000	901230000	695630000	542680000				20	3	3	40.5	5.3	5.3	57.936	0	57.998
19443000000	18490000000	19240000000	22668000000	19632000000	24962000000	21745000000	17280000000	18218000000	24586000000	18676000000	23536000000	15508000000	15822000000	22838000000	21493000000	19037000000	19541000000	20272000000	21602000000	21004000000	19326000000	16519000000	24320000000	24762000000	20620000000	27084000000	23479000000	24291000000	23117000000	24338000000	17639000000	29574000000	27686000000	23389000000	26407000000	24512000000	31398000000				20	20	3	43.3	43.3	8.1	58.061	0	323.31
12661000	6429900	0	1018800	0	9400600	29533000	0	0	0	460630	5596800	0	17843000	0	0	52384000	20836000	0	3177500	0	0	3215100	0	2785800	17101000	4358800	7182100	8983100	0	13228000	0	0	0	0	3321100	3060000	0				19	1	1	27.3	3.9	3.9	92.468	0	16.114
41243000	391150000	101350000	65400000	142620000	78336000	68049000	78719000	182860000	99144000	199830000	105030000	107180000	94896000	134030000	21557000	15812000	50324000	88347000	101680000	64908000	13351000	87900000	136430000	106810000	123120000	155460000	197300000	130490000	163960000	96069000	100020000	131820000	87950000	104410000	72464000	45040000	68982000				5	5	5	26.8	26.8	26.8	23.656	0	74.628
13313000	16819000	18149000	23056000	14397000	9355300	15562000	14538000	14197000	14116000	25357000	13063000	39241000	15361000	11521000	23400000	21127000	16123000	31820000	24057000	16775000	17201000	15016000	13579000	14468000	14937000	14304000	15705000	20284000	19582000	16749000	13670000	17860000	21003000	24163000	16963000	12450000	14679000				4	4	4	5.2	5.2	5.2	117.97	0	7.5777
142380000	104100000	74826000	54578000	15576000	3639200	44379000	124220000	280880000	108230000	0	69773000	63689000	34112000	246020000	278600000	67357000	189210000	45719000	74419000	65239000	165140000	0	150370000	175640000	201110000	394870000	297880000	353420000	178570000	318360000	128750000	167800000	8090000	226420000	88621000	84854000	586720000				1	1	1	12.8	12.8	12.8	10.192	0	31.842
630890000	729200000	553910000	759950000	899220000	707770000	811950000	550230000	624730000	514600000	555710000	1059200000	785800000	920500000	705790000	679390000	733270000	603680000	810160000	1032100000	933150000	996140000	841940000	565390000	690740000	728370000	743240000	661710000	639880000	683290000	778440000	679170000	634970000	748390000	645390000	849450000	487850000	670580000				13	13	13	49.1	49.1	49.1	64.132	0	323.31
1637500	3369700	7634600	9882000	5530600	14309000	4413400	4512700	0	3216700	8908800	11028000	11623000	13904000	2902000	9859000	4723500	0	0	0	9493200	0	3647600	3743800	0	0	0	0	3715000	0	0	4387400	7187700	0	826940	6571000	8256700	10208000				1	1	1	5.5	5.5	5.5	51.801	0.00036711	5.5311
281080000	167790000	243080000	254670000	146080000	108070000	143690000	207570000	239240000	248330000	279970000	35734000	180910000	143500000	165770000	173880000	212650000	175340000	122180000	190710000	92296000	168070000	193130000	148460000	143450000	174880000	256280000	156960000	153780000	240030000	261320000	209390000	190570000	157090000	149450000	123120000	145290000	183440000				8	8	8	18	18	18	57.136	0	151.81
32332000	35195000	113590000	2913200	0	0	13641000	47673000	34764000	0	9298300	5406300	0	20131000	0	18583000	37703000	46163000	0	19543000	10535000	0	0	27905000	27813000	33792000	64675000	25823000	38536000	23588000	92763000	0	38730000	0	26937000	0	0	35829000	+			7	1	1	27.3	4.6	4.6	42.064	1	-2
268870000	240840000	173570000	855880000	486030000	348850000	239870000	271170000	231520000	247750000	349580000	476660000	577110000	229300000	291810000	315800000	418740000	321250000	323850000	208470000	345780000	341030000	441060000	209340000	201110000	327310000	244090000	294440000	204590000	302860000	287900000	295720000	295120000	338090000	204480000	183080000	151490000	162410000				24	24	24	42.7	42.7	42.7	108.83	0	323.31
26600000	9850000	23585000	45624000	19770000	15523000	51812000	21703000	50605000	12495000	17850000	94638000	39163000	0	24403000	0	32756000	22132000	0	35010000	6910100	18735000	17876000	24943000	27790000	35976000	17998000	34767000	26764000	30928000	41624000	33159000	17595000	28986000	13509000	13404000	24608000	3977600				2	2	2	10	10	10	55.755	0	13.145
88267000	60764000	46182000	66379000	54621000	38964000	46165000	87262000	62749000	40462000	46162000	45755000	112310000	65006000	67450000	32330000	89163000	18503000	39544000	40864000	43738000	244610000	77766000	25033000	26621000	36185000	16159000	23791000	22143000	21290000	21730000	42651000	34722000	50166000	53406000	83560000	54781000	22313000				10	4	4	19.6	10.4	10.4	69.412	0	191.15
26540000	13317000	10214000	0	22808000	7058100	18437000	0	9245000	5536100	0	11606000	5645900	28021000	16933000	8802800	9858100	0	0	0	0	0	29745000	0	7128900	21548000	12323000	0	6441400	0	2271200	0	2977800	5111000	17452000	11533000	21878000	6550300				2	2	2	12.7	12.7	12.7	26.365	0	39.294
4725900	0	3378100	0	15312000	0	0	9160800	4813000	0	0	6681900	0	0	0	0	0	0	0	0	1714400	0	0	0	0	0	0	0	3417200	0	0	0	4019400	2718600	3556000	1675400	0	0				2	2	2	7.5	7.5	7.5	43.157	0.00061977	3.1017
312140000	379690000	385360000	429450000	188440000	337930000	382170000	351720000	350180000	398560000	266980000	290490000	419850000	333480000	237790000	246250000	309100000	526780000	310230000	212870000	280470000	287180000	318830000	321050000	317880000	158540000	178610000	227040000	266690000	229390000	166340000	200460000	280870000	415940000	409180000	467940000	298220000	391970000				7	7	7	29.7	29.7	29.7	31.324	0	212.21
20071000	18717000	18007000	23348000	11332000	24306000	17091000	16571000	21383000	20958000	20483000	15922000	26371000	19519000	13109000	9298800	21667000	16185000	17131000	0	16231000	18187000	17650000	15239000	15199000	14366000	13079000	11620000	37167000	11992000	12602000	14100000	15074000	17763000	20061000	19616000	15134000	16000000				4	4	4	12.9	12.9	12.9	50.033	0	9.0716
2838800	5067400	0	23376000	5900500	0	6642800	7848300	18577000	0	0	7905600	4913300	3241300	0	0	0	6563000	0	0	0	0	5543300	4761100	0	13669000	3711500	0	8765700	8892700	0	7556600	0	0	2698600	4060500	900210	0				2	2	2	11	11	11	28.067	0	9.3339
7642700000	5381700000	8480700000	4805600000	477510000	8535700000	7799700000	8476500000	4959700000	6741500000	3411400000	3857000000	5291900000	8852400000	5523900000	3214100000	7883600000	10280000000	5276100000	4763600000	10065000000	4876300000	8246000000	4094200000	6164100000	4420300000	5200000000	5868900000	6645000000	4490200000	6979100000	9425900000	11859000000	7021600000	7647600000	4133800000	7290600000	7269600000				5	5	2	53.8	53.8	22.4	15.144	0	323.31
137300000	8509600	218510000	94148000	169590000	177520000	178090000	195840000	198380000	173160000	179160000	198880000	154930000	117750000	156000000	133330000	92502000	304460000	226920000	171350000	120790000	254070000	279090000	159680000	176240000	123850000	283700000	191030000	205370000	271380000	224400000	146400000	162820000	129880000	141570000	129230000	257570000	205810000				5	5	1	23.1	23.1	2.9	30.375	0	323.31
63216000	23894000	29265000	47441000	45137000	39087000	106490000	42415000	63322000	82692000	48174000	62819000	24306000	60875000	43885000	68304000	48372000	81657000	100570000	60516000	92279000	99028000	27159000	64572000	82687000	57798000	94647000	48796000	55400000	91928000	105830000	75987000	71745000	46418000	69688000	52597000	89646000	71856000				12	12	12	12.9	12.9	12.9	166.48	0	110.55
7604500	3664200	7251600	0	2807200	7575200	5756900	0	0	10388000	8285300	13921000	6911900	7162900	0	0	6454900	6812200	3534300	6456100	0	5276200	4182200	0	0	7518800	7147100	2921000	4732000	2941100	11110000	0	9791600	8117900	4658900	4062700	3965600	3286400				2	1	1	7.3	4.4	4.4	44.297	0.00092678	3.0685
44638000	35734000	30127000	23649000	26585000	21281000	38105000	29516000	12274000	19051000	51007000	26860000	15863000	19122000	23598000	20573000	31134000	6960600	0	44730000	0	16662000	22103000	19759000	25254000	24912000	16955000	19259000	13879000	26855000	20566000	28606000	25663000	40406000	25424000	21699000	23757000	13691000				2	2	2	13.1	13.1	13.1	35.136	0	24.751
0	1838700	1954100	8908500	0	0	0	5026200	1065300	0	1678200	3019800	4175600	1422400	0	0	2632400	0	1276900	0	2073200	0	0	3370300	2718200	2974200	2582000	0	0	3044100	0	0	0	0	0	0	963380	3871000				3	3	3	6	6	6	122.67	0.00063111	3.2933
2749000000	2687300000	3528100000	2235600000	2569900000	2706500000	3653900000	2473700000	2266000000	3484000000	4578300000	2976700000	3058700000	2278400000	2746300000	3601400000	3028600000	3503900000	3978600000	3859700000	3818000000	4612000000	2493300000	2855200000	3686000000	3129200000	3580700000	3328400000	3763900000	3398200000	4108000000	2075500000	3203900000	3546200000	3438200000	3428600000	3719200000	3862800000				28	28	9	47.4	47.4	16.1	85.76	0	323.31
7450500	0	0	3335300	0	0	0	0	5424000	0	0	0	0	0	0	0	0	0	0	0	0	0	0	5073400	0	4863700	0	0	0	0	3631500	5284500	4330100	0	4571900	0	4874700	0	+			1	1	1	2.6	2.6	2.6	60.535	1	-2
42236000	32879000	35889000	0	34605000	0	53498000	28215000	7595300	28457000	48884000	26486000	20596000	13345000	11406000	16497000	19740000	0	13033000	11841000	26256000	14304000	18993000	22770000	25634000	17930000	54268000	39025000	27909000	40951000	24289000	43735000	37665000	37268000	33242000	40676000	23564000	23724000				7	5	5	27.5	20.8	20.8	59.024	0	12.156
0	0	0	0	0	0	0	0	0	0	0	0	0	0	0	0	0	0	0	0	2561100	0	0	7341500	6866400	0	8793000	7533100	0	0	10150000	0	0	0	0	0	0	0				1	1	1	4.2	4.2	4.2	40.965	0.0023578	2.6544
538360000	991490000	521520000	267090000	439230000	254620000	238380000	569330000	604170000	612180000	532980000	208730000	372290000	198390000	288630000	244860000	198400000	167540000	346970000	390140000	0	151080000	289360000	486830000	417750000	623870000	634330000	462590000	476070000	577490000	462090000	829880000	440660000	802770000	581080000	514600000	524210000	215080000				2	2	2	9.3	9.3	9.3	22.58	0.00036337	5.3137
3903400000	1791400000	3891900000	2117400000	2925200000	4559100000	3970100000	7523300000	4252000000	5871900000	5519100000	2482000000	5434100000	295000000	2749100000	2782300000	1937200000	2045100000	6341600000	4368900000	5274000000	3496500000	4150600000	5101300000	8291700000	7012000000	6198600000	3254500000	3962800000	4004200000	3604800000	6044100000	3538500000	1370600000	4257000000	2077900000	757530000	5986900000				2	2	1	13.1	13.1	7.5	21.364	0	6.5965
126620000	204800000	275070000	137370000	110720000	235280000	165200000	115390000	151680000	247050000	112500000	205270000	104940000	218030000	184350000	224110000	142020000	143500000	314720000	184310000	219870000	174310000	164920000	186190000	159090000	248980000	323030000	261080000	231220000	174470000	240050000	92472000	222700000	220540000	199640000	214870000	212350000	210960000				13	8	8	19	12.3	12.3	99.546	0	323.31
336800000	302480000	215110000	239020000	291740000	392420000	484980000	202660000	93597000	203100000	400610000	484310000	685700000	455470000	256860000	371470000	241060000	281680000	252720000	343540000	367640000	318330000	290600000	194810000	339800000	239990000	262920000	269040000	305620000	233240000	421420000	219600000	323790000	245280000	366190000	210240000	366340000	219690000				5	5	5	33.5	33.5	33.5	37.221	0	317.54
1377300	1730300	2250500	1825200	0	0	1222400	2170600	0	0	0	0	2108100	0	0	1232400	0	0	0	0	0	0	1948300	0	0	0	0	0	0	0	0	0	0	4584300	0	1827000	0	5855100				1	1	1	3.6	3.6	3.6	49.885	0	5.6066
308250000	401140000	516550000	229490000	492410000	202630000	539250000	685100000	849300000	522550000	417690000	277280000	187780000	297430000	254480000	333420000	374250000	294470000	309060000	236930000	265470000	180920000	251700000	551180000	415130000	435360000	334890000	301270000	289210000	391500000	394120000	514900000	441800000	238850000	365100000	330000000	319290000	301970000				4	4	3	24.2	24.2	18.1	17.302	0	59.486
58156000	126840000	43926000	324040000	0	16758000	58539000	42929000	381320000	91305000	86163000	69740000	194360000	48644000	64402000	8702600	97913000	15450000	66423000	8813900	70559000	31258000	483410000	92656000	30400000	141820000	19665000	270840000	20944000	45038000	36846000	121000000	28117000	28244000	18803000	1055000	28662000	16568000				5	5	5	1.9	1.9	1.9	565.33	0.0033012	2.1728
0	2088600	0	0	0	0	0	0	0	0	0	0	0	0	0	0	0	0	0	1688400	0	1470400	0	0	0	1141300	0	1224800	0	0	0	0	0	0	0	0	0	0				1	1	1	9.3	9.3	9.3	22.382	0	7.4825
4544000	3388500	3280200	6129900	5432300	0	0	5927600	3866900	2337100	2190700	0	0	5010700	924540	2783200	3892500	0	0	3101300	5844700	0	2622100	0	4729900	3691900	5870100	5412400	4926900	2660500	8048000	6588300	1828400	2772500	2532900	0	3838200	5029800				2	2	2	6.2	6.2	6.2	63.629	0	13.231
0	59045000	0	55087000	58382000	0	37837000	47473000	0	0	72099000	58108000	0	0	0	0	54893000	0	0	0	0	0	85018000	0	68635000	59525000	0	39067000	0	81404000	0	97098000	0	67468000	66118000	0	0	0				1	1	1	2.9	2.9	2.9	46.564	0.0060606	1.9146
38736000	38312000	59775000	0	0	18548000	18558000	46037000	41929000	0	0	0	28201000	0	0	0	18737000	0	46991000	0	0	0	12337000	60621000	0	0	0	198900000	138550000	76909000	86915000	36905000	47842000	0	35295000	0	41253000	20899000				1	1	1	8.3	8.3	8.3	21.541	0.0030666	2.2392
178510000	292620000	152920000	250440000	126910000	157660000	194490000	115030000	152510000	146640000	165900000	212870000	130440000	149840000	141930000	149300000	179270000	150740000	229940000	211700000	195470000	296940000	169430000	105460000	151680000	195550000	207900000	149110000	167710000	123530000	186200000	131570000	140820000	141200000	147570000	191630000	159600000	153780000				10	10	6	23.2	23.2	13.4	76.749	0	229.92
23107000	39064000	13858000	28842000	31022000	22371000	17936000	18147000	26328000	37312000	39151000	17237000	8732100	21502000	20704000	18177000	15128000	0	25202000	24013000	32815000	13252000	5067500	18619000	2642700	39110000	22906000	20060000	17670000	21799000	25459000	25189000	25781000	17054000	26713000	25267000	31944000	13053000				6	6	6	7.6	7.6	7.6	129.29	0	31.36
6198100	8605200	0	0	0	0	0	7883700	2796700	2622400	0	2959600	0	3136700	0	0	0	0	1399900	0	0	0	0	0	2067200	0	2675300	4993800	5874800	0	0	3565200	1910300	0	1139600	0	5109000	5058100				1	1	1	5.2	5.2	5.2	43.049	0.0031021	2.3432
32279000	41180000	26441000	0	14107000	11033000	12485000	20214000	27896000	22720000	0	0	35348000	15932000	22219000	17984000	20882000	0	19698000	17775000	23855000	0	0	21595000	32064000	27763000	26279000	44163000	31678000	41399000	25477000	19424000	24719000	0	0	0	73462000	34172000				2	2	2	2.8	2.8	2.8	84.936	0.00035651	4.9217
19480000	16091000	11959000	11643000	9513700	14683000	11964000	11710000	16047000	13289000	9946900	30283000	12826000	9663200	3768900	0	18337000	8861500	13389000	19385000	16146000	0	12365000	2449000	0	24470000	10691000	22713000	12578000	11548000	15740000	5682100	8260000	6101700	11122000	9909000	8074200	7376900				6	6	6	25.6	25.6	25.6	46.402	0	60.984
10142000	20792000	0	23031000	34300000	30327000	11388000	25467000	30891000	40957000	44718000	15261000	13572000	28207000	0	1521300	18549000	0	0	17939000	69507000	20439000	0	1079600	52551000	26593000	35970000	36260000	34121000	35773000	43876000	1287500	30683000	0	0	21508000	32892000	0				1	1	1	7.3	7.3	7.3	16.402	0.0055881	1.9836
524970000	337190000	513910000	222490000	404090000	309920000	290450000	431610000	468190000	422660000	591470000	467520000	306040000	327630000	429790000	516970000	375500000	421120000	558050000	611370000	471380000	678600000	424870000	551430000	711960000	495620000	866740000	638290000	517280000	588800000	637840000	408360000	525670000	438060000	508230000	539210000	533440000	752580000				14	14	12	27.2	27.2	23.8	74.111	0	310.75
129140000	157170000	162400000	136620000	100850000	166770000	172910000	132520000	113430000	130990000	166610000	159640000	175510000	162840000	91518000	107760000	118000000	98079000	169460000	102640000	141300000	211960000	118240000	89762000	142440000	152980000	127010000	136800000	207250000	160490000	214300000	156220000	187060000	192250000	174980000	135120000	116610000	133590000				7	7	3	34.1	34.1	9	39.821	0	210.38
117190000	150700000	95895000	124450000	102910000	90839000	113120000	114410000	108640000	89816000	57672000	151160000	110550000	107400000	71654000	61224000	118750000	237870000	124340000	93103000	84893000	75193000	129570000	51938000	42271000	105550000	40439000	80745000	62827000	44884000	58854000	59608000	72742000	96233000	73825000	115160000	65939000	63163000				10	10	5	21.7	21.7	10.6	71.475	0	63.074
265970000	173250000	192950000	218140000	220070000	56707000	139730000	222290000	191500000	192740000	242300000	217110000	219150000	88560000	142520000	125120000	271410000	163080000	189050000	184420000	185890000	222100000	246960000	159260000	146330000	185710000	235110000	216050000	158530000	182610000	196730000	145830000	192070000	74664000	211880000	160710000	153470000	215650000				16	11	11	37.5	28	28	69.147	0	191.82
661820000	1202100000	491760000	694750000	706680000	396830000	506110000	435270000	704710000	827100000	1004000000	733010000	489490000	449160000	657140000	547740000	616990000	512950000	867190000	816060000	973150000	676520000	460680000	691670000	690990000	590190000	646110000	716650000	611510000	562360000	545610000	646380000	695350000	971450000	834490000	792580000	567250000	605720000				9	8	7	19.4	18.2	15.8	85.018	0	323.31
103390000	0	0	79386000	56900000	65007000	28183000	65093000	0	52951000	26119000	164500000	91940000	25192000	36193000	0	82072000	38365000	0	0	0	0	50573000	35874000	26303000	90426000	78032000	16076000	0	15245000	13494000	124080000	14442000	30076000	21129000	32032000	0	0				2	2	2	10.4	10.4	10.4	26.152	0.000619	3.082
213730000	215680000	747750000	720830000	351490000	355160000	308800000	0	0	0	0	0	0	0	0	0	0	0	0	0	0	0	0	0	0	0	0	0	0	0	0	0	0	0	0	0	0	0				6	6	6	3.7	3.7	3.7	150.77	0	8.749
300190000	320220000	210140000	351200000	239820000	298840000	271980000	256340000	276860000	262390000	313130000	277980000	328220000	271780000	206560000	231130000	237200000	255740000	324600000	228110000	322190000	244080000	251230000	283480000	235240000	268010000	247930000	265310000	314720000	228770000	269780000	254410000	224130000	226070000	235150000	218360000	249170000	258720000				13	13	13	47.6	47.6	47.6	49.203	0	323.31
1037800000	1000100000	1115900000	897850000	891380000	1046000000	1138300000	1021500000	1024700000	924290000	1231500000	795530000	782970000	1211800000	1108600000	920000000	1104800000	1199200000	744390000	1141500000	767590000	888610000	1081300000	1157800000	1192700000	1100600000	1062500000	934550000	863120000	1005800000	1079900000	1031900000	862320000	1092300000	944540000	1007600000	1276900000	820900000				16	16	16	45.5	45.5	45.5	60.343	0	323.31
0	0	0	31830000	9019000	0	0	0	0	0	0	0	9849400	0	0	0	0	0	0	0	0	0	0	0	0	5268400	0	0	0	0	0	0	0	0	0	0	0	0				1	1	1	4.1	4.1	4.1	33.937	0.0023481	2.6171
988960	1675800	0	0	0	0	0	0	0	0	0	0	0	0	0	0	0	0	0	0	0	0	0	0	0	1343900	0	0	0	0	0	0	2385600	0	777590	0	627160	0				1	1	1	2.7	2.7	2.7	46.274	0.0030539	2.2243
28854000	34025000	34351000	29679000	20851000	8382600	30444000	31686000	24200000	33453000	23908000	19721000	41662000	45130000	20158000	17071000	14542000	0	6092700	24818000	14939000	10115000	23637000	25878000	11160000	17224000	19945000	17094000	36933000	41579000	26952000	10370000	30067000	28277000	18120000	19157000	22373000	42440000				5	5	5	11.3	11.3	11.3	88.053	0	12.396
30163000	34559000	20180000	45367000	30213000	76940000	51768000	39316000	28058000	44635000	47809000	98593000	95827000	58658000	63317000	66758000	39254000	0	43397000	31950000	106180000	39214000	40461000	25777000	40184000	31479000	8240400	11871000	13067000	21627000	10144000	14119000	28711000	29121000	40600000	51766000	24468000	23538000				6	2	2	52.8	23.9	23.9	20.511	0	98.84
66886000	174400000	85023000	243880000	188190000	154280000	182060000	109550000	190570000	146040000	186590000	120550000	94489000	84962000	57518000	122650000	254050000	90029000	99374000	111370000	119070000	193830000	123200000	209240000	128290000	186850000	246820000	151080000	200310000	156800000	194740000	136400000	141540000	191680000	117090000	127380000	85364000	78856000				4	4	4	21.4	21.4	21.4	29.225	0	24.882
433810000	512810000	340780000	497860000	535510000	384620000	394260000	587710000	511530000	427200000	563780000	400380000	464020000	273070000	394050000	265210000	377470000	271960000	316750000	353660000	357710000	272400000	582570000	397960000	339340000	544300000	380500000	300710000	336720000	426690000	361060000	641440000	269270000	395040000	386480000	409550000	335910000	488960000				21	21	21	35.6	35.6	35.6	116.72	0	323.31
16746000	21817000	22742000	29682000	14025000	45840000	16195000	22707000	24981000	19449000	19264000	19321000	18826000	35295000	18877000	22752000	15259000	26954000	19298000	12653000	20182000	19539000	21335000	24105000	21224000	27985000	24266000	18587000	31602000	19972000	27890000	25015000	29253000	24361000	26843000	15666000	18227000	29467000				8	8	8	17	17	17	89.702	0	18.869
4922700	4691100	10396000	3314700	2466600	19132000	10237000	4730000	4086200	5545300	10548000	9371000	5480600	17616000	18924000	16925000	12482000	24114000	5768100	13647000	0	11273000	6012000	10873000	2231200	1440000	1729200	3170700	3710800	1573000	2933200	1670500	7979900	12677000	6703700	8128200	7113700	8249500				1	1	1	4.3	4.3	4.3	54.162	0	23.129
2940100	12773000	6824600	6562400	11550000	9536900	12077000	6110200	12074000	8460500	0	10951000	0	8195700	7188300	4504600	0	0	2116300	12074000	4338000	4809200	12278000	14246000	17799000	3504000	8391900	8098500	8423600	19430000	7792100	45028000	14402000	9113700	5954300	2954000	7140200	4040300				6	6	6	5.1	5.1	5.1	232.3	0	5.8043
107450000	127030000	162870000	246400000	261620000	49513000	27908000	219090000	21446000	73387000	0	132440000	97868000	0	51102000	49192000	117450000	0	76495000	13544000	16801000	41165000	71783000	130360000	88612000	103960000	84707000	222580000	145520000	206250000	78789000	129450000	211160000	45666000	62857000	63797000	125640000	57749000				2	2	2	17.8	17.8	17.8	17.094	0	39.698
788380000	930500000	454320000	3877200000	1087100000	365200000	531790000	3960900000	4059400000	571750000	402620000	540020000	1418900000	720650000	638480000	353440000	773830000	596930000	530490000	315880000	537040000	287700000	3780500000	702500000	393680000	964830000	474940000	885660000	372090000	833540000	505940000	5702300000	629490000	351020000	522980000	466900000	603700000	426100000				13	13	13	48.7	48.7	48.7	30.325	0	323.31
23673000	8130800	5487400	114630000	4908900	7941300	0	6898900	46980000	7933900	9839800	6409000	18195000	5279600	25002000	0	51678000	0	2120700	0	17270000	0	33436000	23376000	0	24113000	10213000	9904500	7441700	13039000	6080100	45396000	8234000	6115000	6405500	0	59819000	0				4	4	4	18.6	18.6	18.6	36.599	0	323.31
10343000000	9934200000	8312900000	11496000000	8685600000	8787300000	8726400000	7795100000	8678600000	8511900000	9941100000	7578600000	5314200000	5851800000	6471700000	8516100000	8131700000	7881400000	14074000000	9942700000	10215000000	8168100000	9885200000	6800400000	8784900000	7522100000	6646900000	6738400000	6366000000	8190900000	8116300000	7786700000	8706200000	10135000000	8096400000	7970400000	7986800000	9528800000				12	12	12	64.6	64.6	64.6	28.804	0	323.31
18265000	6246000	11178000	24210000	17610000	54569000	30181000	30612000	5411700	20804000	67463000	40006000	14750000	40028000	41016000	24742000	24066000	31403000	18478000	0	0	1247200000	25594000	25833000	41798000	23889000	54782000	17114000	53493000	36893000	34165000	44117000	26254000	27357000	16530000	33032000	19526000	15595000				4	4	4	17.3	17.3	17.3	44.969	0	52.835
0	14204000	7476500	0	11524000	0	9506100	0	15060000	13605000	11973000	12871000	8369700	15003000	0	0	10416000	0	14867000	18226000	0	0	0	14376000	20398000	0	24678000	16835000	9632600	20462000	19618000	28785000	23098000	13979000	0	6423900	18227000	20987000				2	2	2	3.1	3.1	3.1	96.257	0.0053405	2.0029
347780000	487520000	174400000	418030000	408360000	465910000	311500000	340950000	308250000	273370000	329490000	418940000	425130000	395840000	356830000	346680000	634590000	378280000	323400000	329670000	297840000	427200000	554100000	349160000	294570000	476330000	350460000	293090000	338180000	340020000	248380000	417590000	200470000	287070000	272930000	319260000	302660000	216640000				12	12	12	25	25	25	97.039	0	222.41
167050000	112300000	83516000	169210000	135460000	133250000	161180000	46858000	154170000	143270000	159150000	100650000	124030000	164580000	107030000	127870000	221030000	133640000	257040000	88364000	109210000	101440000	81015000	120060000	121900000	103540000	171010000	148960000	114340000	173480000	179410000	122850000	145190000	142350000	80973000	54433000	205970000	174770000				5	5	5	27	27	27	40.923	0	117.66
19451000	17316000	13008000	7993100	17005000	17518000	26484000	13098000	6987700	18010000	0	19878000	4714700	27584000	0	6362300	16309000	0	0	12288000	0	36438000	6831600	12293000	16387000	7839500	9304000	27754000	13412000	19286000	5985900	0	17206000	27136000	21199000	27832000	16038000	21464000				5	3	3	17.2	10.7	10.7	40.175	0	141.81
15362000	7393400	2018500	0	0	0	0	1802400	5641400	4353600	0	0	0	3068600	17944000	10026000	13249000	0	0	7457500	0	0	0	0	0	0	0	0	0	13091000	0	13208000	0	5114500	6418900	5167200	3424900	3841600				6	1	1	62.6	17.5	17.5	19.794	0.0006192	3.0855
274270000	109710000	80924000	160310000	128850000	71998000	95645000	171680000	411900000	68042000	189730000	181380000	160920000	262250000	177040000	34207000	112740000	15093000	40036000	30208000	176870000	22943000	82363000	57209000	28617000	83016000	25369000	28400000	12321000	52726000	33927000	81000000	8707500	34177000	59256000	70546000	22818000	36133000				1	1	1	8.3	8.3	8.3	21.044	0.00034376	4.3022
788170000	264850000	72761000	1218200000	1574800000	322880000	4456000	1485200000	961300000	530510000	174320000	483870000	840340000	549100000	456510000	31753000	988600000	0	232450000	0	103030000	27515000	320190000	591100000	40966000	424680000	28970000	151940000	22420000	572340000	19470000	384890000	30009000	0	320500000	338300000	0	0				3	3	3	64.1	64.1	64.1	8.7839	0	98.148
205850000	210100000	177150000	228050000	223460000	194820000	211070000	146470000	198450000	238850000	179940000	155110000	220980000	192610000	184420000	178340000	225950000	259090000	65149000	193440000	197140000	248670000	172860000	222560000	191890000	229120000	228750000	204390000	173150000	197150000	205950000	204080000	193850000	160980000	239410000	178570000	185360000	242100000				18	18	13	49.3	49.3	38	81.243	0	182.5
923270000	788350000	891830000	526610000	778050000	691980000	549360000	539690000	798780000	781850000	1107500000	603760000	687500000	701100000	574870000	503690000	642800000	847710000	774720000	642510000	629240000	664960000	383040000	699630000	719780000	733300000	723710000	762010000	742030000	931390000	862790000	867200000	862070000	617760000	715310000	519940000	671850000	880090000				6	6	6	8.5	8.5	8.5	76.613	0	108.52
1642600000	2050300000	2718400000	1279600000	2505400000	2322000000	2310800000	1347900000	1756500000	1899100000	2439500000	1840500000	1886100000	2479900000	2240900000	2314000000	1578200000	2009600000	2015200000	2565500000	2110700000	2588100000	1602400000	1982300000	2507000000	1703100000	2594200000	2245700000	2100500000	2693800000	2500000000	1804300000	2391600000	2127000000	2459200000	1845200000	2821000000	3199400000				16	16	12	26	26	21.4	102.48	0	323.31
41339000	24503000	32484000	19789000	22126000	28756000	38222000	19056000	19275000	34526000	21200000	37341000	32776000	36253000	33237000	27830000	26951000	0	40982000	28388000	9362500	16533000	6241300	26579000	30440000	56799000	28492000	28541000	9971300	17272000	20037000	14237000	28811000	41499000	21769000	52200000	35555000	41786000				4	4	4	32.4	32.4	32.4	31.441	0	56.295
22789000	20007000	15440000	16434000	12248000	23616000	24275000	15461000	16030000	18702000	23512000	23581000	36283000	30372000	21792000	14224000	50236000	29884000	41022000	22904000	22796000	23400000	20313000	17939000	32546000	14796000	11192000	18824000	18332000	25532000	15438000	17416000	22961000	16007000	27066000	30080000	31518000	13694000				3	3	3	28.6	28.6	28.6	24.551	0	66.192
343770000	412650000	454670000	338340000	626760000	411920000	373390000	276600000	522880000	386110000	616600000	309550000	361710000	435930000	311350000	504760000	245050000	381470000	494380000	433240000	501620000	600060000	307110000	366780000	469130000	346560000	499220000	376250000	434170000	441010000	661900000	198320000	398420000	660120000	496730000	448760000	513270000	647570000				9	9	9	37.8	37.8	37.8	27.391	0	323.31
14542000	31228000	14298000	42351000	16488000	8676700	4362700	39448000	64615000	9601800	8749400	0	13394000	0	62156000	27903000	65439000	0	0	0	0	0	6086300	22074000	20785000	24885000	9174300	9771200	8143200	11043000	13037000	15884000	0	5079800	8212700	0	0	0				1	1	1	2.2	2.2	2.2	57.39	0.0026163	2.5633
1157800000	1058400000	254020000	1577300000	867550000	430850000	477000000	1116500000	1358900000	422720000	691940000	817010000	866890000	594320000	585070000	271900000	919390000	384910000	449130000	309370000	390430000	240340000	1174200000	618520000	221530000	761380000	257670000	416650000	320270000	411380000	211320000	860740000	243730000	208330000	642040000	1007100000	327740000	349640000				12	12	12	39.9	39.9	39.9	38.759	0	323.31
1991200000	2745700000	693430000	2901400000	2044500000	1289900000	1209400000	2707900000	3204400000	1036300000	1224400000	1737100000	2164000000	1727600000	1275300000	539570000	2013000000	526070000	1635300000	884050000	906290000	650980000	2525700000	1248100000	676110000	2782000000	661330000	1101700000	699570000	1078800000	573690000	2665800000	585410000	502970000	1555700000	1591200000	817920000	920560000				13	13	13	48.7	48.7	48.7	38.422	0	323.31
31901000	15876000	16131000	17015000	31026000	28560000	27912000	28553000	24837000	28111000	40169000	47028000	33896000	45962000	21539000	28112000	64637000	52553000	42920000	10159000	23548000	36055000	25784000	34343000	30252000	48115000	67722000	15099000	31605000	42986000	29616000	31166000	36712000	22085000	27109000	42702000	35338000	45308000				7	7	7	29.1	29.1	29.1	41.213	0	17.924
13905000	26622000	6638500	8077900	2593700	37966000	18915000	7489500	4983000	8606900	13106000	0	16518000	16391000	13600000	10869000	0	0	0	17057000	6459000	6818300	14632000	8059800	9088300	16164000	4962200	9379600	11119000	6750600	5310800	8007800	2398100	3315700	16235000	11236000	14114000	8382000				2	1	1	29.6	20.4	20.4	17.103	0	34.426
0	42110000	38345000	6999100	36449000	39887000	30973000	69167000	0	25108000	31580000	0	0	20423000	15453000	28134000	0	64574000	56455000	22417000	35369000	0	8159900	31313000	42883000	37638000	101990000	28725000	47026000	35161000	66336000	36896000	65800000	0	0	9782800	51263000	0				19	1	1	21.3	1.4	1.4	130.62	0	9.1552
64206000	62762000	64516000	72451000	61689000	27330000	38243000	68528000	86398000	50591000	36785000	34051000	53139000	46586000	58401000	42133000	46868000	50797000	62060000	50425000	44768000	55904000	67748000	61019000	44939000	45534000	39766000	47894000	47682000	49082000	47715000	92190000	58536000	57699000	62638000	31338000	67899000	35125000				3	3	3	11.1	11.1	11.1	38.388	0	52.617
25048000	103450000	50329000	49384000	60577000	16690000	11731000	161440000	71308000	48171000	25978000	41495000	34880000	57121000	45594000	26341000	37014000	0	81576000	31010000	41856000	72484000	42559000	56475000	49909000	67566000	62607000	28440000	49133000	65421000	74508000	116300000	38683000	63818000	46745000	33002000	52507000	68759000				3	3	3	7.1	7.1	7.1	50.315	0	14.007
18512000	31240000	27897000	40838000	31296000	42115000	41615000	20784000	31481000	30697000	30538000	43802000	52042000	43458000	28178000	23155000	22335000	18512000	45964000	37020000	26815000	23221000	37856000	32374000	21086000	19994000	21963000	28022000	38432000	22425000	26683000	23230000	16686000	18406000	37150000	14358000	23450000	29035000				5	5	5	26.3	26.3	26.3	34.239	0	36.698
1603600	852310	1849800	1517800	2637100	0	0	2070000	1657700	1692300	1201800	3220100	4869600	2815700	1238500	1998200	2837500	0	0	0	941720	0	0	0	5056400	4694900	3735100	1417200	1784700	1896800	1485800	0	0	3105100	368640	1725300	1284300	905520				2	2	2	5.6	5.6	5.6	82.605	0.00064998	3.56
6663800	8364900	5282000	5953800	4453500	9577700	24667000	5210900	3009700	6664400	3001700	12343000	11784000	0	0	0	7213400	790460	0	6063600	5748500	0	5306400	4578400	4501100	3948700	2893000	4809900	5744900	4219600	3805600	3234800	5195800	4751200	5060100	5459700	4078800	5806800				2	2	2	12.5	12.5	12.5	35.657	0	8.494
33567000	28782000	25301000	34468000	17166000	28586000	35031000	18861000	19649000	20024000	27776000	49999000	21545000	46376000	30611000	31332000	28693000	58820000	23799000	41020000	22001000	51087000	40245000	56096000	31784000	24388000	27981000	25076000	36279000	39361000	26671000	25726000	21963000	27250000	24213000	30646000	28265000	15989000				4	4	4	48.8	48.8	48.8	17.699	0	39.696
2771500000	2001100000	1182000000	1819700000	1894700000	1513700000	1422200000	2518400000	2287900000	1393400000	1247000000	2119800000	2421600000	1707000000	1688000000	1276800000	2206600000	1189700000	1679200000	1662800000	1705100000	1403800000	3180400000	1447400000	1122000000	2240000000	1052400000	1368900000	1221800000	1501000000	1298100000	3422200000	1034100000	1048100000	1528700000	1438600000	1195000000	995260000				19	19	8	54.2	54.2	21.9	80.738	0	323.31
675130000	595860000	737010000	345890000	569400000	403200000	611040000	531350000	253670000	765880000	579980000	433740000	658930000	767380000	555090000	587960000	489700000	444280000	369630000	691600000	751110000	689320000	603360000	517980000	633080000	618710000	513010000	469090000	468830000	580430000	676000000	429210000	838730000	1517300000	859840000	916960000	895050000	904950000				5	5	3	40.9	40.9	19.5	24.97	0	323.31
3025300	3396600	3236800	5768200	0	2681600	6937600	3252900	3523000	2505300	0	0	1209500	4679400	5144500	0	4520500	0	2564800	0	3135500	8606500	3820700	0	3369300	2833900	0	2238800	0	0	3968400	5459500	4537900	5375200	4523300	0	5950100	2995700				2	2	2	16.9	16.9	16.9	24.758	0	18.383
11002000	7282400	5842000	12257000	7667700	0	18725000	12325000	12894000	10990000	12129000	24071000	9725900	12676000	15401000	21125000	5203800	0	9426000	11667000	12401000	12122000	7168100	29171000	46649000	30853000	25031000	16148000	8633000	9530300	11851000	13779000	7930000	19800000	10463000	14232000	15812000	10897000				4	4	3	32.6	32.6	26.1	24.389	0	22.313
626630000	451570000	550200000	439750000	514250000	509750000	614890000	458970000	590730000	470160000	632070000	719510000	405890000	537730000	657680000	488650000	552250000	533800000	619230000	769370000	492700000	701950000	472750000	399420000	425560000	571110000	714310000	502030000	706520000	312430000	661490000	625140000	490010000	559280000	581030000	517090000	475680000	561580000				7	7	5	56.3	56.3	46	23.747	0	134.5
516860000	462300000	657740000	705840000	685190000	454490000	900920000	676520000	292940000	520650000	361140000	307600000	565630000	742650000	440490000	416320000	519310000	1017000000	277000000	326020000	379500000	779350000	220190000	479480000	593440000	605650000	729890000	594260000	476780000	534200000	573480000	464910000	708710000	761890000	527700000	518580000	797340000	797450000				6	6	1	42.8	42.8	10.6	23.593	0	286.65
1924900	5890000	0	5346900	9202600	0	0	0	0	0	8653500	5061700	3409800	0	0	2343400	0	0	0	0	0	0	0	0	0	2884200	1943900	2788700	4536000	5453200	6795500	3868500	1900800	0	4078900	2603000	0	5103300				6	1	0	42.8	10.6	0	23.548	0	46.067
67312000	96024000	97137000	0	52539000	79154000	62910000	97771000	99634000	61307000	71420000	85271000	0	45906000	109930000	37827000	80314000	143680000	143400000	88288000	74697000	52688000	31352000	0	68787000	51016000	80525000	58370000	69082000	63566000	89689000	65579000	46160000	50232000	59196000	25998000	92337000	181980000				3	3	3	19.1	19.1	19.1	12.059	0	128.49
31964000	4668000	14535000	20669000	18367000	15825000	15954000	28274000	33422000	26399000	32537000	17595000	20211000	21721000	22018000	15483000	0	32973000	37521000	18901000	39544000	6220600	0	34484000	21517000	17690000	59779000	37526000	17946000	33423000	46063000	23259000	14865000	41927000	40442000	23202000	25625000	48007000				2	2	2	2	2	2	127.41	0.00063816	3.3839
208870000	144020000	224040000	163170000	108640000	193210000	149760000	117800000	200500000	161130000	157490000	211240000	206990000	161800000	212760000	170960000	199630000	254310000	184730000	167320000	210450000	123580000	295850000	113170000	117650000	143820000	130210000	142170000	141000000	142580000	110750000	208460000	193290000	300370000	128640000	178380000	125710000	176540000				6	6	6	36.5	36.5	36.5	26.489	0	123.18
109540000	79054000	38474000	72406000	197980000	412430000	385820000	131170000	180970000	70788000	97372000	908610000	197490000	0	379030000	153960000	264330000	583800000	290650000	352550000	229080000	539060000	132880000	153190000	252960000	382620000	418640000	355030000	357570000	58518000	422820000	43364000	145250000	165900000	173760000	241440000	146730000	38762000				3	3	3	30.7	30.7	30.7	16.762	0	56.578
1033300000	1585000000	968060000	1004600000	1037700000	880740000	970650000	738100000	947600000	917620000	1775000000	837140000	773100000	757480000	1068700000	747140000	1025600000	1277500000	1519300000	1361000000	1203400000	1160300000	1164200000	749280000	748920000	1021100000	2060200000	801070000	893540000	791370000	1019500000	895360000	970380000	885110000	1036300000	1104500000	1105800000	1283800000				9	9	9	22	22	22	66.408	0	323.31
804960000	912820000	1273500000	803220000	1177100000	972480000	881760000	612580000	788590000	1555900000	1305100000	1224100000	791260000	1180900000	1040000000	1191500000	1151000000	1606500000	1428300000	1291800000	1119400000	1397600000	878550000	1540900000	1392600000	1480000000	2828500000	1736300000	1883400000	1353400000	1487700000	1042700000	1461300000	1037300000	1267200000	1868800000	1205900000	1146100000				11	11	11	33.3	33.3	33.3	55.405	0	253.6
0	0	3004100	8705300	4916700	3127500	5311500	0	0	4463100	2880300	7574900	3841900	4767300	0	0	0	0	3628900	4674100	5217000	2920700	4335700	0	0	0	0	0	0	0	0	0	2634500	4334100	1509100	3622800	2722800	3459600				3	3	3	3.6	3.6	3.6	183.56	0.0030412	2.204
43586000	79684000	43020000	35923000	41522000	24244000	26424000	46839000	132350000	38883000	46030000	9637300	22535000	32948000	34825000	61834000	80118000	57158000	26962000	12891000	42579000	18266000	15220000	36689000	26800000	50055000	29162000	25435000	32545000	56501000	30017000	32405000	76893000	19372000	37382000	7185000	37460000	27317000				12	12	12	20	20	20	100.4	0	22.185
318070000	129170000	191010000	237700000	178250000	129970000	326090000	148230000	338600000	798370000	169150000	95568000	154670000	55290000	187030000	92633000	133030000	402770000	526950000	537660000	192560000	155090000	141930000	99418000	64234000	25658000	282110000	130590000	30986000	35150000	37956000	91612000	441140000	667060000	293680000	839430000	304350000	490580000				1	1	1	7.2	7.2	7.2	22.317	0.00062598	3.2079
0	19183000	10950000	2555300	0	9499200	5324800	25778000	0	4586300	0	3449800	4800000	11293000	5355700	4909000	12378000	8292400	0	8851700	0	13998000	0	7154100	10229000	11725000	5964200	6582700	7783400	7114500	0	7192400	11746000	0	0	9263500	0	0				2	2	2	7.6	7.6	7.6	45.229	0.0015002	2.7996
2790900000	1975800000	2580000000	1698200000	1810500000	2455300000	2981600000	2182500000	1694200000	2537200000	2921800000	3544200000	2211800000	2590400000	2310800000	2941700000	2149000000	3626100000	2240800000	3357400000	2260400000	2792200000	2218700000	2567900000	2976100000	2329900000	2732200000	2263300000	2158600000	2090700000	2533700000	1997800000	2879600000	2970300000	2252600000	3020300000	2860700000	2907300000				19	19	19	63.2	63.2	63.2	56.5	0	323.31
279070000	367240000	429070000	301960000	207530000	272940000	279380000	301320000	395130000	422480000	382980000	313360000	214190000	228610000	285950000	321900000	377630000	191320000	399040000	302590000	278050000	440880000	467180000	278850000	334680000	321740000	385710000	367030000	377350000	339060000	403100000	315410000	393830000	457670000	385050000	446360000	370100000	476130000				14	14	13	42.9	42.9	40.8	43.941	0	323.31
251640000	183300000	165200000	228490000	103280000	57535000	80350000	212280000	283310000	255990000	0	129360000	0	116530000	193180000	116980000	84830000	0	231160000	219340000	204390000	0	0	119290000	109270000	194210000	199660000	208040000	146850000	234960000	219230000	150580000	124930000	119940000	335260000	308980000	123160000	170360000				3	3	3	21.2	21.2	21.2	20.567	0	17.72
2513900000	2210100000	1251300000	2754400000	2574600000	1502100000	1273300000	2588900000	2368200000	1414100000	1912900000	2004000000	2308100000	1492400000	1642000000	804050000	2018200000	875430000	1383500000	945910000	1541400000	824740000	2704200000	1612200000	886730000	2244800000	937370000	1148200000	892560000	1271900000	839680000	2595400000	910870000	1093900000	1557700000	1657400000	1053800000	1360100000				42	42	37	28.9	28.9	26.3	280.01	0	323.31
13830000	1781400	17217000	9688200	7185000	9678300	19640000	10855000	14272000	12543000	7894900	17517000	7940800	8458600	10821000	18907000	13262000	8685700	3470800	4349500	17104000	16190000	31855000	7257500	12045000	13450000	3082200	9143000	9264100	6798500	5336200	4436900	36430000	15964000	19942000	5917700	7168100	16331000				6	6	6	4.1	4.1	4.1	317.03	0	10.307
237570000	398190000	208400000	326220000	282920000	214800000	294670000	260350000	219340000	276470000	217470000	349780000	282500000	311160000	274450000	200230000	262010000	119960000	121050000	237260000	218250000	150880000	295400000	157210000	102430000	132670000	104730000	122640000	136890000	138620000	166270000	132780000	211370000	157470000	212120000	243880000	228190000	335700000				9	9	9	16.4	16.4	16.4	98.398	0	130.61
1380100000	1877000000	2153900000	1047300000	1332000000	1269800000	1556300000	1287800000	1150300000	1783600000	3060800000	1300800000	1346500000	1961500000	1453400000	2108100000	1843700000	2334500000	1067200000	1947400000	1545500000	2557600000	1564300000	1454600000	1935800000	1785000000	2239800000	1449300000	1346400000	1039300000	2003600000	1281900000	1684600000	1412600000	1801100000	2094500000	1848700000	2562300000				14	14	12	44.1	44.1	39.1	47.573	0	323.31
0	0	0	0	0	0	0	0	0	0	0	0	0	0	0	0	0	0	0	0	0	0	0	0	0	0	0	9291200	8296300	9928400	8811600	0	0	0	0	0	0	0				2	2	2	8.9	8.9	8.9	35.139	0.0084986	1.7581
84575000	114160000	61280000	338810000	65415000	62646000	0	122200000	141640000	149590000	295190000	276530000	254850000	35638000	207940000	85834000	206140000	0	268400000	114980000	145610000	53563000	156470000	199460000	136060000	162570000	65056000	101430000	74491000	149830000	45991000	217160000	100060000	51474000	186070000	135100000	56249000	77442000				1	1	1	33.3	33.3	33.3	4.8234	0	74.482
34347000	19011000	30495000	23769000	25932000	46131000	38638000	20951000	16259000	23883000	22969000	28827000	11813000	40047000	48419000	31441000	16104000	41402000	26351000	12396000	27390000	32158000	39146000	23679000	26996000	25886000	56774000	20888000	24406000	18692000	25010000	24877000	22966000	58724000	14749000	25685000	32172000	50138000				5	5	5	20.2	20.2	20.2	43.122	0	24.72
7399000	0	3556000	0	0	6821600	0	0	0	7596700	3430000	0	0	6257500	0	1241800	0	0	0	0	0	393430	0	0	0	0	0	0	1261000	0	0	0	5679900	0	3529000	0	0	0	+			6	1	1	31.7	7.2	7.2	24.449	1	-2
33634000	11042000	16058000	45809000	34078000	13542000	0	18977000	19946000	4419200	0	22517000	0	21984000	18707000	14380000	22627000	0	0	0	15175000	0	0	22168000	14916000	29269000	14280000	13802000	10564000	24702000	13447000	22549000	19933000	0	27084000	27743000	18436000	0				3	3	3	8.6	8.6	8.6	61.678	0.00063052	3.2723
2666700	16411000	5255400	4453800	24746000	3182300	12570000	6473600	15359000	5575900	15779000	52408000	13074000	8175500	15587000	11134000	12308000	0	16841000	11500000	21557000	5485000	0	6605600	8784300	7254000	24512000	6987700	7917600	10232000	8734600	0	14543000	11237000	18473000	6174800	9295600	0				4	4	3	7.6	7.6	5.6	89.42	0	14.972
291450000	152750000	94106000	111220000	169440000	204750000	182380000	210630000	275310000	184500000	319720000	271540000	113450000	376220000	325420000	333650000	256340000	267820000	153910000	349200000	261240000	294280000	163230000	202120000	175690000	306230000	218450000	189460000	187020000	201260000	304810000	150040000	192220000	211240000	190730000	180040000	296350000	257330000				5	5	5	41.9	41.9	41.9	24.646	0	323.31
112570000	81096000	101400000	97790000	68330000	163840000	106610000	101430000	67955000	100880000	111620000	94298000	118320000	61310000	53922000	107320000	82313000	103100000	66024000	73466000	95836000	142640000	57647000	156660000	143790000	100440000	221250000	102070000	142870000	104030000	120870000	168450000	150270000	100240000	104180000	117470000	92549000	92082000				5	5	4	31.8	31.8	28.3	33.784	0	19.621
15808000	33666000	25531000	28876000	14991000	20677000	23866000	30077000	31280000	20936000	22019000	29116000	41784000	13343000	17544000	33967000	22100000	42838000	20189000	31252000	25103000	22746000	0	22064000	19828000	42182000	29699000	28983000	52199000	16476000	40569000	25859000	20410000	25234000	24888000	15753000	10887000	11411000				6	6	6	11	11	11	107.77	0	9.9067
78123000	98012000	48697000	87447000	104690000	44372000	78660000	55156000	85028000	88307000	65808000	110120000	84210000	62820000	62371000	62973000	80200000	77486000	49371000	85198000	64672000	50031000	73778000	65097000	57368000	90087000	94412000	80360000	58233000	79809000	57126000	93452000	63168000	78112000	59034000	65464000	51746000	65549000				6	6	6	18.4	18.4	18.4	47.079	0	58.328
3945700	10035000	10920000	6798900	0	8592200	14329000	0	10017000	7428200	6768100	11225000	12463000	9880200	7149200	10931000	7057700	5024900	0	18953000	10981000	0	12824000	10630000	13769000	10190000	21032000	16306000	12103000	19142000	19572000	23494000	17275000	14909000	5536600	10522000	0	11437000				3	3	3	6.8	6.8	6.8	67.795	0.00033613	4.001
2765400000	2548100000	1963000000	1609800000	2082500000	1988000000	2257700000	1898900000	1931800000	2178800000	2265100000	2143700000	2096500000	2346100000	2109400000	1934800000	2006000000	2214900000	2250800000	2466400000	2177200000	2001000000	2265600000	2163000000	2203500000	2334600000	2112300000	2364700000	2140300000	1976300000	2317200000	2091500000	2254900000	2057800000	2155000000	2075100000	2341700000	1788100000				27	27	27	47.4	47.4	47.4	113.8	0	323.31
54229000	46154000	95283000	250630000	81515000	104370000	151670000	91674000	116660000	323490000	255430000	215180000	205010000	50893000	378390000	211880000	86627000	298340000	238690000	238800000	285900000	92216000	79624000	236780000	251470000	132050000	233960000	222000000	196950000	272910000	102310000	149260000	654220000	87206000	248250000	126560000	115610000	162970000				4	1	1	20.2	3.7	3.7	30.137	0	13.226
0	79714000	97673000	0	0	5398500	0	0	325650000	0	0	6245700	0	0	102060000	0	0	0	284270000	308280000	0	0	0	0	0	0	0	0	0	0	0	0	0	22139000	0	0	0	0	+			2	2	2	4.5	4.5	4.5	60.588	1	-2
44229000	51864000	54246000	29053000	27199000	83177000	144270000	56947000	45349000	45268000	39594000	55428000	61870000	69624000	38466000	64994000	59180000	26571000	30235000	7725700	0	61042000	34912000	41967000	41241000	49803000	36866000	49080000	93368000	38222000	51890000	41417000	47825000	91949000	42979000	32853000	44837000	62754000				2	1	1	12.3	6.8	6.8	40.434	0	5.7599
2924900000	5067600000	3958000000	3497700000	5007200000	4407900000	2610600000	3493800000	5465500000	4391500000	4434200000	2744800000	3635800000	3480800000	4099400000	4609500000	3139700000	4521600000	4413800000	4723900000	4165700000	4852400000	3775600000	5227400000	3872800000	4982400000	5360500000	4171300000	4099200000	3838300000	4536600000	5079700000	5107300000	2723000000	4526400000	2925400000	5712400000	5736600000				10	10	10	36.4	36.4	36.4	36.006	0	323.31
1947500000	2428700000	2882500000	1595400000	1994800000	2524400000	1948200000	2138300000	2133800000	3328900000	2564100000	2892000000	2202500000	1438400000	2823100000	3014200000	1402100000	1965100000	3096500000	3652900000	3101200000	1495300000	1557700000	2743800000	4160200000	2298500000	2634200000	3227000000	3261800000	3185300000	2131800000	1822000000	2110600000	2483100000	2067900000	2339000000	2288800000	3016300000				9	9	8	40.6	40.6	36.5	31.54	0	323.31
472250000	530330000	418670000	183040000	740370000	264920000	385470000	327000000	284550000	480320000	539270000	219670000	309290000	463460000	297990000	446840000	303820000	262260000	512350000	303820000	703560000	996490000	489960000	282970000	361640000	157050000	1042500000	214500000	231900000	362200000	578840000	453490000	380250000	650390000	340630000	492520000	449340000	782790000				2	2	2	6.8	6.8	6.8	48.442	0	186.43
4862900	17947000	14771000	21017000	18762000	12333000	10292000	13603000	16745000	17574000	36111000	15466000	17843000	0	22142000	17370000	11533000	20437000	101810000	67208000	33577000	10479000	29535000	18002000	22592000	17222000	26773000	38539000	43489000	30801000	21177000	22609000	46886000	34405000	35270000	41381000	24077000	0				3	3	3	13.6	13.6	13.6	33.969	0	7.3973
0	0	0	0	0	0	0	0	0	0	0	0	0	0	0	0	0	0	0	0	0	1527200	0	0	0	0	0	0	0	0	0	0	0	0	0	0	0	0				2	2	2	5.7	5.7	5.7	56.084	0.00036684	5.5267
753330000	715730000	679010000	459980000	630190000	738200000	1088400000	477360000	559780000	572860000	815110000	790840000	662550000	568820000	549720000	669260000	603900000	898330000	764490000	843150000	804540000	703460000	668400000	490110000	630780000	523260000	684570000	440010000	521970000	546510000	655460000	469240000	741440000	1020800000	627440000	737230000	683410000	848300000				21	21	3	24.2	24.2	4.8	134.71	0	323.31
949730000	593480000	1020000000	1317500000	620000000	857870000	990390000	748180000	863080000	1035800000	1024900000	1131000000	1188800000	1236900000	1007300000	970190000	1220300000	2009800000	1176500000	939240000	997770000	706310000	872060000	1142900000	1113900000	1119600000	1006100000	1363600000	1051100000	1049600000	1036400000	908100000	866200000	876020000	1040900000	1003000000	757810000	610450000				6	6	6	14.7	14.7	14.7	76.149	0	282.64
66270000	120170000	61946000	80763000	41136000	72471000	77975000	62237000	52839000	61240000	63124000	83578000	75939000	116780000	33433000	85098000	57254000	7104500	50387000	77763000	48737000	74109000	32766000	53969000	49324000	50720000	40468000	64700000	50271000	79052000	48869000	65118000	41175000	48393000	66654000	44733000	65525000	92212000				13	13	13	61.4	61.4	61.4	51.169	0	64.019
793350000	678700000	614630000	195640000	689810000	354570000	458190000	825640000	454860000	944330000	502230000	310370000	390440000	655890000	375220000	294660000	629100000	397520000	114600000	205980000	501490000	242080000	328150000	323710000	447990000	464860000	377180000	246010000	266780000	356910000	403910000	455730000	430720000	395090000	778870000	252220000	709540000	533020000				5	5	5	26.4	26.4	26.4	23.742	0	240.14
7711400000	7269100000	16277000000	7187200000	6624000000	11088000000	14487000000	6389100000	13205000000	13936000000	6450400000	6488100000	10633000000	10212000000	13917000000	3996600000	9528600000	404690000	1787300000	2865900000	5298600000	4211100000	3524100000	21893000000	16890000000	19121000000	18313000000	28520000000	14311000000	25517000000	13333000000	14742000000	6867100000	8385900000	9159600000	10110000000	9642700000	10806000000				4	4	4	75.5	75.5	75.5	10.546	0	323.31
21641000	35130000	37202000	23398000	17842000	42032000	29760000	14328000	26668000	14858000	17039000	67916000	22143000	29251000	16756000	18699000	23679000	0	14640000	26479000	18905000	27024000	11098000	15717000	16007000	17111000	18479000	12482000	23706000	24982000	15606000	18170000	21915000	22853000	24911000	11373000	30682000	7516200				6	6	6	17.5	17.5	17.5	53.586	0	62.606
24274000	17979000	25898000	20433000	30326000	35712000	0	21088000	21513000	19917000	12359000	29852000	44252000	22602000	22862000	26088000	71717000	17128000	0	0	36008000	21337000	14613000	28478000	26750000	33063000	25983000	20203000	31094000	22696000	28530000	17730000	15629000	15780000	16710000	23010000	26660000	17909000				5	5	5	6.5	6.5	6.5	112.73	0	12.778
96008000	82685000	54727000	144080000	102590000	39135000	30856000	124230000	107480000	78457000	32389000	73872000	56202000	100510000	55575000	70014000	90766000	56442000	118200000	51848000	63814000	51133000	64746000	51816000	56181000	103310000	48116000	57673000	45895000	52725000	56051000	98702000	48370000	46078000	65434000	127870000	41498000	50096000				5	5	5	18.4	18.4	18.4	48.851	0	64.177
1092700000	589280000	1045100000	580770000	536010000	478460000	397320000	717120000	785610000	744840000	1049900000	361890000	613630000	721600000	894290000	703980000	506620000	867870000	488170000	585070000	671140000	615770000	543640000	818920000	821160000	890480000	1121100000	565310000	610210000	750340000	734160000	884230000	770500000	584460000	830450000	453590000	838240000	651780000				10	10	10	49.8	49.8	49.8	26.688	0	95.374
0	1262500	0	0	0	0	0	0	0	0	0	0	0	2708000	0	2188100	0	0	0	1710200	0	0	0	0	0	0	0	0	0	0	0	0	0	0	1213300	0	0	911470	+			1	1	1	7.1	7.1	7.1	51.692	1	-2
17233000	29820000	116260000	71121000	37511000	47729000	40788000	63262000	69651000	25954000	69733000	41067000	63165000	24923000	52509000	50240000	34972000	0	24298000	65988000	82453000	66227000	49916000	32023000	36471000	57453000	94379000	39070000	29078000	72872000	55940000	33714000	49712000	44115000	48394000	28571000	41302000	58737000				3	3	3	41	41	41	18.884	0	99.035
40661000	39130000	46017000	27253000	21035000	70924000	42220000	47519000	17452000	38128000	29752000	60026000	31507000	42243000	37369000	43987000	49830000	74389000	29361000	41117000	34896000	58929000	28473000	50840000	80883000	45653000	49642000	35429000	40071000	30946000	53687000	35525000	33163000	40033000	36986000	43007000	47063000	109880000				13	13	8	11.5	11.5	8	212.13	0	35.224
0	0	904970	718430	0	0	556930	915380	955960	1136300	0	512510	0	0	385110	0	617760	0	0	409060	0	0	0	958840	1444100	710650	0	732640	0	0	519400	631880	535220	945830	205730	0	0	1347900				1	1	1	2.6	2.6	2.6	71.381	0.0030564	2.2252
0	1400800	1002100	0	1945900	0	0	0	0	0	1085100	0	0	0	0	0	0	0	0	1315000	1104100	0	932040	0	0	0	0	0	0	0	0	1499100	2271900	0	0	0	0	0				1	1	1	0.7	0.7	0.7	158.77	0.0089997	1.7512
12722000	0	4353600	0	7629500	2737000	14754000	11977000	0	12289000	14372000	19895000	4344200	6275900	6526600	22522000	31334000	13923000	14793000	13232000	22633000	17316000	18871000	20566000	12725000	3172200	13992000	5114600	4652800	6553900	4913900	20659000	9180800	13492000	8838200	11544000	11697000	8566900				3	3	3	2.8	2.8	2.8	253.67	0	226.4
2282700	0	2028000	0	9322500	15459000	10952000	3478900	5466500	5533600	0	9994500	16001000	8708700	0	10077000	34351000	19186000	4198900	9921700	12722000	3749800	0	7432900	5882200	5754900	11778000	8278100	8757000	14180000	7825200	6474600	6424200	7763500	4010300	3378500	9021200	5062600				1	1	1	6	6	6	33.939	0.0025974	2.5115
63155000	72120000	70388000	50116000	22328000	123910000	37285000	56414000	89164000	44651000	22464000	24187000	40654000	13911000	27975000	19491000	28869000	12256000	19647000	530110	24968000	23274000	29287000	23938000	22495000	32487000	19601000	14690000	20718000	25185000	18430000	23551000	31126000	34752000	14596000	16793000	23889000	10265000				7	1	0	55.4	10.2	0	18.502	0	10.286
51221000	63242000	53361000	78125000	258280000	51009000	30353000	34655000	52038000	25939000	17568000	104610000	0	31958000	53793000	56122000	45755000	0	30863000	50252000	64911000	49827000	36310000	2590400	4344000	842380	1438200	0	0	18053000	1451400	23853000	53756000	31433000	38649000	37156000	34138000	36079000				3	3	3	7.4	7.4	7.4	69.15	0	32.938
27907000	60463000	32571000	42012000	40395000	40580000	61922000	44124000	64187000	44772000	51291000	2286500	64521000	14993000	31475000	39568000	43038000	43644000	75103000	37404000	99989000	58452000	0	49594000	6345500	48042000	40714000	51595000	93031000	8501000	57961000	0	91949000	44758000	30681000	33906000	28073000	39106000				11	4	4	12.8	5.8	5.8	132.59	0	11.518
648050000	528200000	484880000	622810000	702150000	587920000	710530000	486240000	432530000	532000000	732980000	588520000	570420000	594300000	580740000	498170000	635500000	617130000	585980000	530260000	712080000	627080000	499510000	553340000	485380000	625940000	561970000	490690000	510550000	433010000	594200000	413820000	562860000	550710000	605510000	612240000	593060000	484260000				25	25	25	49.9	49.9	49.9	80.769	0	323.31
0	0	0	0	8712400	7220000	0	0	0	0	0	0	12877000	0	0	0	0	0	0	0	0	0	0	0	0	0	0	0	0	0	0	0	0	0	0	0	0	0				2	2	2	6.7	6.7	6.7	73.776	0.00064977	3.559
5119600	5683900	8165900	7169300	3025500	9027800	4214300	6005200	5493700	5626300	4254500	5812000	11114000	5122300	2303600	5019200	5397300	7018700	4203800	6609000	3347100	0	8200900	6393100	3713800	3273300	4036900	4336800	6028600	2773400	5479600	3792000	6020800	7040200	4602200	7561200	6157500	5115000				5	5	5	12.9	12.9	12.9	90.069	0	7.297
104530000	102810000	196830000	100500000	87281000	84051000	118370000	98269000	86881000	207170000	180540000	198170000	145280000	94203000	145660000	162710000	109870000	207480000	117410000	122810000	182120000	337410000	50870000	120850000	112340000	76641000	108120000	151730000	124580000	84240000	135350000	71169000	216700000	295830000	107380000	113010000	208760000	182300000				3	3	3	9	9	9	39.186	0	147.94
13188000	11439000	9154800	8675900	7743100	7045900	8359800	7330400	4412000	8171400	5225600	10932000	13561000	13413000	23748000	19006000	7064500	0	0	7839000	0	19639000	0	8719600	4717800	2515100	2884100	6885300	8770600	2645900	5242700	3460400	9632100	3300100	9896100	10019000	4233800	9828400				2	2	2	17	17	17	24.542	0	9.2408
714210000	478380000	630020000	655460000	782260000	956140000	833580000	462610000	427250000	519900000	799540000	652280000	974830000	1222400000	622020000	556860000	470280000	413850000	349670000	607250000	469840000	378550000	454760000	423730000	473600000	454280000	455910000	386310000	545770000	521740000	456460000	471460000	449870000	443940000	762850000	378250000	657100000	646050000				6	6	6	37.8	37.8	37.8	24.763	0	211.66
0	73725000	0	30054000	41029000	0	0	0	0	178500000	104530000	72629000	31188000	52319000	72966000	42581000	86120000	60814000	105650000	30163000	0	106160000	0	40247000	54614000	31683000	57351000	65444000	61877000	63157000	58420000	34523000	62114000	34526000	63744000	46547000	30343000	36112000				3	3	3	17.2	17.2	17.2	28.908	0	44.748
130470000	152650000	210260000	119080000	240630000	127500000	99452000	141900000	156630000	147190000	144580000	99747000	173970000	84489000	133510000	127500000	131900000	121130000	79262000	122960000	109760000	83028000	200820000	137900000	159100000	169840000	194820000	270060000	198520000	172960000	220420000	158020000	141410000	98178000	180920000	130280000	174680000	92919000				4	4	1	53.5	53.5	17.8	11.427	0	160.24
7249100	6537700	10135000	8557000	3765400	11082000	11470000	6771900	5359000	7670800	24508000	7535800	12116000	9316500	11873000	9296700	8360000	27276000	7832800	13634000	7934600	8177900	8101000	4743700	3738700	3346800	2632000	3540000	4828400	3382000	2718400	3447400	10438000	10631000	6347200	10601000	7181700	9731000				4	1	1	52.5	16.2	16.2	11.208	0	6.0008
59930000	30327000	70731000	49555000	129510000	44058000	60478000	36999000	32900000	95208000	73581000	79724000	58662000	105440000	50299000	54947000	33010000	77347000	28909000	24506000	150320000	124890000	0	61359000	55634000	45205000	52969000	55406000	66586000	68856000	60361000	79534000	72389000	71329000	51282000	48521000	79293000	118630000				2	2	2	19.1	19.1	19.1	17.175	0	117.71
64866000	58729000	35928000	59747000	61977000	66189000	51229000	39493000	61890000	83278000	42796000	62655000	43483000	49484000	49376000	33522000	76778000	25820000	47282000	48218000	38417000	43441000	58181000	58552000	59747000	61923000	44577000	48189000	47544000	44795000	49760000	37656000	42461000	42282000	39278000	83842000	51699000	53545000				10	10	10	10.5	10.5	10.5	217.17	0	241.84
0	21723000	35549000	2599200	0	7979800	0	23585000	42614000	45308000	0	4621200	0	761870	10981000	19545000	7503300	43151000	4333500	834470	0	31254000	7539400	23885000	38727000	22347000	23567000	16626000	20504000	24578000	31909000	19931000	25597000	0	25837000	9053000	54280000	87943000				1	1	1	2.4	2.4	2.4	42.781	0.0023613	2.6632
1297400	1236400	0	5952300	5067700	2529600	5123500	2345800	1908700	5111600	5638200	0	0	0	4427100	0	4064400	0	0	11163000	9129900	6639700	0	7468900	2768400	3497000	4393200	0	0	3956600	0	0	4825200	0	0	0	3908200	2364700				1	1	1	0.8	0.8	0.8	300.44	0.0053792	2.0367
6461900	4479100	4343300	6640900	0	8400500	0	7800900	5454000	3636300	3180000	3112100	9115500	6102800	3545900	3210600	3682500	0	0	2446400	0	0	10542000	9875300	3354500	3320800	0	0	0	0	0	8366600	0	3660500	3010000	5705900	3197400	4245300				2	2	2	13.3	13.3	13.3	55.259	0	16.656
17790000	22388000	18167000	8915700	6322800	19653000	23806000	15169000	15336000	23225000	18909000	16879000	18647000	24601000	35694000	29233000	13237000	0	5354400	12913000	0	0	0	39159000	26178000	26912000	37063000	15430000	24524000	31221000	24345000	15087000	19665000	12137000	0	27070000	15713000	19236000				3	3	3	28	28	28	22.831	0	14.773
0	0	0	0	2025700	0	4101300	0	0	0	0	0	0	7870900	0	0	0	0	0	0	0	0	0	0	0	0	0	0	0	0	0	0	0	0	0	0	0	0				3	3	3	2.1	2.1	2.1	337.08	0.0030479	2.2194
326750000	419040000	445460000	699450000	390030000	409240000	391960000	418860000	443020000	604230000	830130000	289420000	382930000	292900000	450880000	542960000	302280000	683420000	819410000	384420000	744820000	351630000	434820000	573590000	550390000	473740000	395490000	384660000	120730000	451430000	217310000	457380000	534550000	444350000	571200000	808460000	317990000	763220000				4	4	4	40.9	40.9	40.9	14.515	0	323.31
17010000	8242800	4578400	4137300	0	0	0	0	0	16380000	8456900	0	7259100	4118600	5457300	14776000	0	17253000	0	12092000	0	0	0	5599000	4030000	6282300	3641700	4977400	3755400	4211600	7022500	10552000	0	0	11696000	0	0	43304000				2	2	2	4.7	4.7	4.7	88.06	0.0031117	2.3782
0	0	8386900	0	0	0	0	4619100	3816800	9149900	4571900	0	6250300	4570200	3664900	873810	0	0	5050300	3937000	0	0	0	0	3538400	0	0	0	0	0	0	0	16367000	0	0	0	0	3193200				2	2	2	8.7	8.7	8.7	44.712	0.0053677	2.0256
69582000	36630000	54724000	42034000	61996000	45491000	47785000	60506000	66583000	51405000	0	54178000	68909000	48349000	57141000	49410000	38431000	51785000	78790000	77564000	57480000	43657000	88896000	51351000	58604000	32579000	69346000	37533000	47914000	55789000	65402000	50451000	45446000	79798000	65414000	34263000	62322000	52222000				5	5	4	20.3	20.3	16.8	38.044	0	40.965
28670000	27075000	43142000	24860000	6089100	30117000	60559000	47404000	20799000	39759000	21402000	46641000	41583000	27049000	26131000	36805000	33499000	22074000	2038600	0	0	26460000	42640000	53122000	64324000	52283000	50514000	40779000	46475000	63772000	75288000	50497000	15936000	32956000	21210000	37632000	25804000	41613000				3	3	3	17.3	17.3	17.3	30.568	0	232.03
1617100	4900200	0	0	0	0	1281200	39365000	0	948540	0	0	2568200	28892000	0	0	64032000	0	0	0	0	1596100	11749000	4798400	71229000	0	883010	1717900	160480000	88910000	250720000	2392500	0	0	0	0	16740000	0				18	1	1	49.3	4.2	4.2	54.493	0.0026316	2.5849
35623000	0	0	29819000	16848000	0	4483700	0	24987000	0	0	4432900	9423700	0	0	5016700	10970000	0	6436200	0	8562500	0	5752400	17759000	0	15977000	0	0	0	0	0	0	0	0	12738000	0	0	4175100				1	1	1	5.7	5.7	5.7	31.626	0	14.222
146200000	187320000	146350000	256970000	206740000	275110000	194480000	157880000	249980000	160950000	252060000	182020000	305650000	267680000	206070000	134490000	190370000	93706000	212440000	183800000	199780000	184780000	219180000	129000000	103310000	154140000	170690000	103530000	118810000	114760000	138030000	112560000	219750000	129890000	139620000	181880000	183090000	205730000				6	6	6	44.9	44.9	44.9	29.555	0	143.37
271620000	221280000	256600000	257700000	178900000	182170000	198300000	212430000	215530000	215910000	160600000	184790000	164310000	242520000	120450000	175340000	233360000	86870000	210530000	170650000	194720000	177250000	242760000	104350000	123330000	172460000	86386000	206190000	175540000	194630000	165750000	116810000	204770000	226280000	162630000	147260000	183090000	226820000				5	5	5	38	38	38	25.898	0	58.258
113860000	51105000	91154000	85197000	133330000	87119000	138110000	52871000	78408000	84268000	108190000	90999000	89883000	68340000	106890000	76575000	60374000	165120000	79858000	82917000	70758000	58555000	99571000	95478000	125820000	172120000	101850000	110510000	88371000	91707000	115350000	119440000	69920000	154180000	75606000	106260000	119250000	85353000				4	4	4	21	21	21	27.647	0	26.825
160230000	196380000	234730000	215970000	212070000	221240000	274520000	186430000	291000000	158330000	348890000	241450000	396210000	196040000	196740000	202020000	164010000	112330000	250480000	194300000	179990000	229240000	211660000	193090000	181690000	164840000	114480000	183450000	337690000	135370000	233880000	179110000	107200000	159130000	122220000	273020000	194850000	73693000				7	7	7	52.5	52.5	52.5	29.483	0	139.21
6992600	7800800	9192000	8965800	4172700	16176000	8542300	8773400	5190500	6668500	5674900	7567600	8788000	5705100	8451500	6705700	6991100	0	8511200	4417200	4911100	4517100	9406700	0	0	5703900	6769400	5353000	6034600	6559400	5128200	5771600	4589300	5609400	4194800	10790000	3518900	6000100				3	3	3	7.6	7.6	7.6	71.283	0.00064914	3.5555
724120000	771430000	436130000	547250000	574730000	414210000	270170000	940790000	826140000	437070000	352650000	577050000	454210000	691690000	615560000	416170000	568460000	500460000	393730000	255110000	326260000	387180000	687960000	574790000	384110000	714110000	358140000	400960000	306410000	385380000	315400000	724060000	393810000	337400000	502860000	370560000	371920000	310480000				14	14	8	29.8	29.8	20.5	67.819	0	281.87
109280000	96458000	73964000	121810000	108220000	44695000	96733000	99343000	83261000	74000000	42263000	104810000	119020000	120930000	101670000	102340000	142260000	143100000	88094000	64794000	119810000	111200000	125070000	93114000	84828000	117350000	89495000	75053000	63440000	75555000	71109000	115030000	62820000	81816000	60873000	107460000	74694000	77898000				12	6	6	26.4	17.2	17.2	68.563	0	242.98
143830000	188770000	184850000	228110000	196680000	375370000	204120000	237350000	181300000	175300000	300540000	217970000	208320000	240460000	232280000	273950000	165050000	216190000	179090000	200390000	193240000	212230000	159330000	261610000	273240000	298390000	357880000	304870000	200490000	181300000	212600000	207910000	217930000	244940000	205820000	325460000	188980000	188450000				12	12	12	36.2	36.2	36.2	54.416	0	323.31
94941000	104520000	133820000	81297000	101730000	113190000	204160000	96424000	106480000	127570000	158860000	187020000	176760000	142370000	175510000	172750000	125550000	12832000	124820000	193650000	143090000	131080000	166930000	128910000	126460000	120030000	146800000	96034000	85597000	105620000	94582000	98372000	90480000	117300000	103250000	139390000	155500000	165020000				19	15	15	36.6	30.9	30.9	100.45	0	161.06
0	0	0	0	0	0	0	0	8438100	0	0	0	0	0	0	0	0	0	0	0	0	0	0	0	5051300	0	0	0	0	14342000	0	0	0	0	0	0	0	0				2	2	2	7.8	7.8	7.8	46.683	0.00063231	3.3038
664880000	442380000	555920000	644230000	668740000	383090000	518180000	341210000	453960000	444720000	481210000	476800000	413410000	518950000	476220000	564520000	387500000	543940000	435800000	440410000	452450000	486380000	500220000	483200000	448250000	441760000	483900000	563330000	466650000	524090000	497330000	427490000	409540000	458490000	462410000	531200000	494900000	436910000				12	12	12	44.8	44.8	44.8	53.12	0	323.31
6875900	5917200	7756800	5838500	17541000	6948800	3780100	4496200	0	6179800	10684000	8379800	7328200	4375300	12600000	14355000	4339400	0	0	0	9988700	0	8072100	11286000	0	11603000	10738000	186960	0	8862700	11589000	0	0	7795500	0	903220	6793600	7947200				1	1	1	4.3	4.3	4.3	74.071	0	6.9584
27544000	46371000	85042000	15524000	23824000	26103000	36086000	34974000	42501000	65667000	72539000	9937400	33202000	0	40296000	39450000	28186000	25289000	28531000	22505000	64645000	0	23534000	32756000	65107000	45425000	38918000	31361000	35450000	61666000	67620000	74840000	48712000	50528000	56309000	64719000	29584000	48590000				7	2	1	24.6	7.1	4.1	40.405	0	16.048
64114000	34281000	22735000	29619000	102050000	90476000	90491000	36357000	33983000	15886000	25728000	76708000	77327000	58627000	50348000	66190000	48343000	37670000	77686000	42387000	43857000	53044000	64869000	57271000	86268000	36213000	39388000	36394000	29770000	21256000	27378000	20811000	45482000	32885000	37226000	59427000	59257000	12368000				4	4	4	21.1	21.1	21.1	42.724	0	142.74
7696900	6247600	6078300	6930300	2940300	5656000	939110	8398600	4665400	5379500	585830	1849400	1510600	3219400	6519900	2041800	5861800	0	3491600	6081800	0	7015100	14085000	5062800	4154700	1487700	3395000	5851100	2493400	2391200	3428200	4284300	3202100	6205800	3022500	6492700	2752300	4885000				9	1	1	35	3.4	3.4	57.221	0.0006252	3.1894
115810000	197500000	172290000	77821000	124060000	76719000	111140000	194560000	268110000	166350000	239050000	94015000	138020000	131650000	119870000	123860000	81931000	156240000	267460000	227200000	152890000	161220000	66417000	141460000	215440000	162230000	164410000	235810000	179170000	186520000	197900000	181110000	111410000	150190000	134930000	98288000	112170000	91709000				9	9	8	15.9	15.9	14.8	83.434	0	98.426
237180000	129450000	161060000	232360000	261090000	188420000	270190000	152500000	143240000	161780000	236380000	289640000	234490000	229790000	185810000	232210000	195850000	324380000	243300000	200700000	236560000	227060000	235960000	207410000	221490000	205690000	176140000	182750000	213400000	183020000	247870000	278990000	166100000	157980000	184980000	256530000	236200000	172690000				10	10	10	15	15	15	140.47	0	94.066
120510000	3535000	228980000	208770000	177090000	146810000	225710000	87089000	244920000	114230000	0	313460000	214230000	269170000	232980000	228250000	317520000	165410000	286760000	181650000	1657000	0	137100000	0	0	249570000	318960000	272920000	180750000	0	268670000	0	122210000	212420000	170940000	0	138590000	0				12	1	1	35.5	3	3	50.118	0	145.58
213490000	195910000	136560000	166910000	133590000	136750000	153120000	144410000	166370000	161330000	174220000	202380000	180130000	132140000	120640000	197760000	141650000	160030000	190840000	202350000	180800000	210650000	271990000	146780000	214410000	174020000	185330000	125190000	175740000	132770000	162630000	166840000	129310000	171020000	132460000	126450000	194940000	161790000				4	4	4	48.6	48.6	48.6	15.649	0	34.711
9408600	22629000	6024400	8573500	8015000	12364000	17657000	6411500	11682000	6463900	15550000	17816000	7487700	4736600	10293000	9613800	18743000	17609000	19104000	21163000	2762200	16191000	23482000	6980400	10969000	25151000	21751000	15592000	6457500	11725000	6390700	21375000	15826000	10872000	13205000	10442000	13399000	6130000				3	3	3	11.3	11.3	11.3	40.633	0.0003499	4.5953
87880000	33410000	20717000	10814000	0	8284500	3236200	34119000	45006000	0	0	0	8592800	0	7175800	69109000	0	7311000	8524000	12114000	14470000	9573600	15508000	14596000	43505000	15169000	12004000	10755000	12289000	15473000	22073000	13258000	17904000	0	19396000	5183100	0	6907100				3	3	3	16.6	16.6	16.6	24.252	0	6.6774
37763000	35839000	22210000	46303000	16398000	24268000	19999000	32647000	30858000	21001000	23055000	31288000	31362000	24783000	26570000	17953000	29454000	33307000	20989000	16391000	31780000	12810000	48203000	38946000	23301000	33413000	7903800	18990000	13375000	30427000	19353000	34422000	10993000	19071000	23691000	30923000	20799000	11943000				4	4	4	21.9	21.9	21.9	31.73	0	213.82
1020800000	1133400000	1251100000	1240600000	1653500000	1174600000	1220200000	1208000000	696090000	1219000000	1019400000	1425600000	1346200000	1226800000	1089400000	1304600000	1260100000	1151300000	1393000000	1230700000	1130700000	1359000000	1284200000	743410000	750860000	742070000	791910000	869830000	944420000	968820000	1145800000	668960000	756620000	700590000	1034000000	880970000	981700000	844300000				11	7	7	58.8	49	49	27.764	0	323.31
111550000	89882000	45558000	275990000	171980000	76036000	68751000	68109000	119910000	52163000	66737000	104060000	102900000	94937000	123820000	70883000	66957000	0	147910000	92162000	62758000	44232000	100360000	78997000	78302000	150710000	120160000	154570000	166100000	104520000	98162000	126060000	46946000	99039000	57681000	102170000	86459000	111510000				6	4	4	35.6	24.6	24.6	40.088	0	9.9401
32925000	0	23316000	9435300	0	13719000	20054000	12599000	17734000	13834000	14636000	25140000	12612000	7997100	16416000	29210000	41722000	0	0	19145000	17811000	2114100	14764000	15224000	18772000	26885000	34836000	18956000	22992000	20105000	17990000	25063000	25405000	11900000	15981000	14657000	22417000	36246000				4	4	4	8.3	8.3	8.3	79.875	0	13.835
0	0	0	0	0	0	0	0	0	0	0	0	0	0	0	0	0	0	0	0	0	0	0	0	0	0	0	0	0	0	9233100	0	0	0	0	0	0	0				1	1	1	20	20	20	15.736	0	16.536
746780000	782560000	92140000	740130000	20764000	422030000	276280000	1314000000	1407500000	65299000	204210000	5634700	704120000	443970000	349420000	364040000	472670000	48510000	15719000	12132000	26754000	46585000	631670000	396390000	311640000	615570000	66080000	68622000	61696000	134990000	81161000	634500000	156120000	201330000	162960000	182250000	85708000	107630000				21	21	20	53.1	53.1	53.1	75.586	0	323.31
20166000	8778400	0	10269000	19131000	0	19089000	4089800	9657700	14448000	10944000	19687000	0	20590000	14632000	0	0	0	0	0	20434000	7003200	25031000	10464000	9849500	10511000	12333000	45870000	26372000	11680000	19808000	12122000	11421000	35308000	5669600	6620200	11428000	0				2	2	2	3.9	3.9	3.9	68.137	0.00034819	4.5174
443680000	558150000	493660000	992370000	659890000	668140000	664400000	666240000	663320000	898500000	500980000	560450000	565880000	581150000	607520000	520800000	470890000	428070000	520500000	474080000	606960000	804300000	528070000	440660000	437500000	465580000	377410000	770150000	599470000	430810000	489050000	356720000	498690000	753790000	619550000	542040000	376890000	605490000				10	10	10	40.6	40.6	40.6	35.554	0	201.64
52513000	71092000	59726000	64964000	56535000	67501000	67708000	65617000	84305000	51589000	59468000	65039000	68071000	43615000	41181000	21970000	63167000	19216000	49720000	36967000	28937000	31289000	67332000	49237000	42744000	64297000	52826000	44478000	50531000	70418000	38344000	55497000	64938000	58214000	45973000	38438000	32862000	36981000				18	18	18	13	13	13	242.98	0	33.64
51962000	81944000	58833000	44956000	54846000	28865000	14889000	77482000	77509000	18451000	46183000	19794000	29108000	39160000	11447000	115350000	102030000	0	53390000	26608000	20874000	28305000	0	111660000	62729000	68607000	51735000	50197000	47767000	51493000	40538000	95987000	35984000	28475000	34028000	41596000	18572000	22534000				3	3	3	4.8	4.8	4.8	102.9	0	129.07
2437100000	1762600000	1854000000	1219400000	1585700000	1675200000	1216500000	2106500000	1422500000	726740000	1060000000	1759200000	1280700000	974880000	1630300000	1059500000	2022800000	2092000000	1595700000	1297400000	1458600000	1690200000	1524600000	1647800000	1709300000	1786900000	2566600000	1999700000	1614200000	1348100000	2168300000	1991900000	1230900000	931640000	973440000	1139000000	1635600000	1484800000				7	7	7	20.6	20.6	20.6	67.567	0	65.556
11915000	9951200	0	33101000	25935000	8489900	0	17439000	22757000	6419300	0	8132400	24895000	11539000	17944000	11869000	0	60267000	0	0	21085000	0	0	39841000	17818000	13870000	11229000	18786000	14449000	18654000	0	38014000	0	6184000	0	0	0	0				2	2	2	28.1	28.1	28.1	10.704	0.0003375	4.0325
254680000	153570000	163510000	399760000	269520000	235310000	181690000	239510000	221590000	220560000	420870000	185920000	191730000	293780000	136790000	157040000	214430000	237550000	138420000	173240000	181520000	98031000	219590000	261640000	231340000	237210000	311100000	252760000	266580000	312860000	230150000	306470000	305080000	191640000	197620000	199590000	187610000	163840000				7	7	3	48.1	48.1	18.7	26.411	0	203.74
13273000	10642000	0	0	0	20546000	17184000	13535000	0	0	11373000	16814000	47709000	0	0	17535000	17560000	0	13006000	20194000	15297000	13827000	0	0	0	0	0	0	0	0	0	10917000	0	18311000	11055000	18628000	0	0	+			5	1	1	43.2	15.3	15.3	20.035	1	-2
131220000	75158000	88192000	65771000	26682000	23277000	187150000	87292000	87942000	110780000	111200000	16941000	17031000	276420000	80294000	75182000	45939000	39368000	212610000	85552000	69227000	0	145690000	66605000	54313000	49330000	75662000	63985000	0	105630000	90444000	57003000	130750000	112510000	111060000	16189000	124120000	83599000				2	2	2	20.5	20.5	20.5	25.357	0	8.7406
32238000	25454000	17619000	17830000	23490000	26447000	31560000	18347000	12581000	23009000	21167000	54407000	17453000	25580000	21001000	24022000	21191000	31778000	33387000	24485000	41983000	31754000	13444000	16063000	20949000	21178000	16738000	19703000	16650000	20215000	25016000	18079000	18933000	36779000	42032000	18366000	16439000	21897000				3	3	3	23.2	23.2	23.2	28.48	0	23.484
22869000	26278000	19837000	28446000	14343000	25781000	26995000	19548000	21297000	27505000	30369000	36131000	38818000	26842000	27382000	21063000	11333000	13268000	26253000	18584000	25798000	18952000	25859000	24124000	38885000	46704000	11965000	30839000	19803000	17083000	46489000	21187000	18073000	28068000	14837000	24126000	20215000	17903000				4	4	4	10.7	10.7	10.7	62.725	0	37.75
645740000	425150000	708480000	354440000	672620000	654450000	745070000	749140000	365930000	798630000	1784100000	724050000	463970000	649050000	665820000	856420000	451340000	722480000	986130000	669910000	920270000	839200000	267390000	669320000	805760000	617250000	841090000	982340000	1054500000	961090000	1191800000	659410000	736820000	860840000	887560000	436520000	1143100000	769920000				11	11	11	23.1	23.1	23.1	79.467	0	323.31
491020000	646820000	538120000	404420000	466010000	577580000	515650000	719320000	610080000	582290000	454950000	763670000	669820000	547700000	532010000	544510000	643500000	530040000	554240000	435090000	548090000	662600000	627180000	435570000	409880000	502000000	437710000	609180000	441080000	411350000	472430000	453590000	391550000	764070000	392530000	457530000	323540000	462080000				13	13	11	56.9	56.9	46.1	41.389	0	323.31
2899700000	2638600000	1900100000	2178900000	2750000000	2738000000	2521800000	2568700000	2144600000	1997500000	2373700000	2475900000	3120000000	2975800000	2930900000	3540900000	3153900000	2849600000	1935000000	3270700000	2778700000	1846100000	3154000000	2318100000	2707700000	3299600000	2622000000	2373700000	2307000000	2228100000	3158700000	2538200000	1831800000	2052300000	2582600000	1869500000	2517700000	1775800000				11	11	11	50.8	50.8	50.8	48.287	0	323.31
6128900	5281400	2872700	3392000	5125700	6559200	4311900	7497900	21940000	5552500	0	5073000	7573800	3746200	5531700	5161400	5467800	0	0	4358800	5793400	7363800	0	25176000	12932000	22215000	11853000	8965600	0	10361000	9596800	10910000	8826600	4423200	9296900	4581000	4208900	0				1	1	1	5.5	5.5	5.5	24.01	0	14.988
0	5339800	0	0	4644200	0	0	0	5210200	3653300	0	0	2516500	2311700	0	0	0	0	0	0	0	0	0	0	4510800	4192300	7300100	4257500	5645400	4165000	3348400	0	0	0	0	0	0	0				1	1	1	3.2	3.2	3.2	56.921	0.00179	2.7416
29742000	111460000	48292000	74427000	53063000	34152000	27608000	33594000	76055000	58347000	84606000	25709000	34114000	0	49851000	45508000	42884000	85194000	45869000	0	0	40543000	53744000	38169000	51595000	60972000	119550000	41823000	41229000	63221000	78240000	61355000	53132000	18103000	55728000	86654000	61592000	128420000				2	2	2	23.6	23.6	23.6	15.638	0	31.529
39290000	145610000	100430000	77629000	92277000	56020000	104300000	150430000	181530000	130270000	184240000	52955000	126020000	95132000	89711000	63863000	60774000	21319000	146420000	92963000	111940000	66741000	45667000	135950000	91087000	108950000	89777000	87375000	129730000	168160000	88697000	107620000	167790000	68581000	111470000	25391000	85896000	2338800				5	5	5	11.7	11.7	11.7	52.771	0	11.58
279070000	101790000	64294000	187330000	184470000	74380000	81343000	78682000	108100000	56273000	46039000	77690000	35748000	0	46988000	19781000	66271000	0	62803000	0	52336000	738570	123940000	66695000	24591000	61491000	38413000	63917000	98023000	61167000	26022000	60194000	31121000	42197000	64368000	28834000	21899000	50134000				2	2	2	6.8	6.8	6.8	32.401	0	10.499
4711000	6898000	9006300	11329000	5470300	0	6424400	5628000	8144500	8880700	4830400	0	10382000	5821300	3418700	0	0	4887000	0	1909900	1816500	0	5083000	4201800	5500800	6913000	4251300	4894000	4611900	6704500	4072700	6551300	5827500	5232600	3794900	2938800	4281500	4817800				3	3	3	11.4	11.4	11.4	49.452	0	6.678
11147000	13999000	16724000	21236000	6390300	4573200	10415000	13392000	15484000	17282000	9118500	19942000	10073000	7049200	9709800	11124000	11721000	0	0	20447000	4455100	16586000	11418000	17038000	14327000	12066000	13125000	12617000	12138000	17033000	21021000	15583000	9442900	19315000	14988000	17783000	13543000	14171000				7	7	7	11.9	11.9	11.9	138.35	0	8.1845
181930000	67405000	87199000	89647000	98955000	110620000	93690000	157030000	109840000	105980000	74332000	145260000	99138000	64651000	138640000	94050000	170930000	164270000	135100000	85482000	71420000	7754100	199680000	101660000	105080000	161940000	125180000	104620000	97721000	81290000	102240000	181320000	139240000	112200000	140420000	108180000	156450000	139940000				13	13	12	23.2	23.2	22.1	109.87	0	210.38
4371400	4399000	0	5736700	2529200	3620100	4954500	2876300	9393500	6107600	5549400	0	9404100	6568200	4857700	4824500	4760000	5734500	4242300	15633000	7085000	7510400	14505000	9332800	6727900	3433700	16543000	3978600	8717700	4727700	7624000	7887800	7137300	0	3798400	1546300	9802300	38649000				4	4	4	11.2	11.2	11.2	63.124	0	6.5373
470820000	432750000	442340000	459480000	484180000	362700000	567300000	375010000	453010000	382290000	438030000	335620000	456430000	392080000	374690000	402680000	376070000	276210000	304860000	367870000	381580000	259050000	279750000	325400000	326760000	437720000	301950000	324980000	302120000	329750000	269430000	397000000	331830000	308870000	309400000	238880000	329500000	367010000				9	9	9	28.1	28.1	28.1	67.877	0	283.88
0	0	0	0	0	0	0	0	0	0	0	0	0	0	0	0	0	5976300	0	0	0	12833000	0	0	0	0	12023000	0	0	0	0	0	0	0	0	0	0	0	+			4	1	1	14.1	4.9	4.9	44.564	1	-2
0	27043000	16274000	20835000	47804000	28442000	40636000	13100000	0	36513000	10496000	66895000	43060000	22396000	20123000	19758000	19848000	20463000	27467000	19694000	16038000	18535000	20242000	16678000	22078000	21742000	12041000	30834000	20029000	17171000	33510000	15792000	23912000	15528000	17940000	20553000	20203000	13542000				2	2	2	6.5	6.5	6.5	71.407	0	6.8552
299940000	135780000	57422000	741750000	569970000	315350000	180480000	851530000	215380000	38435000	130210000	200730000	265850000	58986000	127000000	54988000	331560000	130740000	87840000	75995000	223150000	119830000	566310000	111290000	39193000	335360000	135740000	174160000	88765000	217070000	126130000	863230000	108130000	89842000	84704000	51804000	140020000	80234000				5	5	5	27.6	27.6	27.6	38.424	0	214.01
149630000	321710000	360340000	337620000	325530000	409960000	140380000	197640000	172940000	354420000	390810000	291160000	305640000	228340000	347350000	394200000	170270000	130850000	411140000	351960000	381090000	300990000	354340000	240450000	232150000	207350000	194190000	274500000	252760000	372800000	277390000	224190000	279520000	271930000	354260000	299240000	368910000	457960000				3	3	3	28.5	28.5	28.5	15.565	0	116.44
392350000	772160000	841040000	456880000	922280000	997990000	874110000	560870000	457150000	767220000	983440000	761580000	660510000	655560000	642680000	808650000	621290000	669570000	711270000	656500000	692780000	718420000	522690000	615690000	771620000	650870000	983880000	656250000	597930000	700940000	749510000	534860000	764600000	822940000	773860000	506720000	849740000	1158600000				12	12	12	44.2	44.2	44.2	43.121	0	148.82
0	0	0	0	0	0	0	0	0	0	0	163260000	0	72007000	0	0	400000000	0	276310000	146540000	98386000	0	0	213410000	0	471630000	113130000	0	45615000	56221000	168760000	0	0	0	0	0	0	0				1	1	1	9.6	9.6	9.6	31.554	0	7.0549
41289000	41939000	75973000	19963000	49540000	91029000	81780000	38624000	43891000	70998000	78311000	56088000	45304000	74946000	138000000	93055000	60817000	878790000	96487000	78627000	5129600	49967000	0	73263000	83552000	65283000	94262000	70439000	82452000	84545000	95658000	60719000	120670000	110360000	118830000	82523000	135040000	99902000				6	6	6	11.7	11.7	11.7	79.585	0	85.163
3326100	17042000	22155000	11071000	14927000	33355000	23118000	20850000	10931000	14842000	0	27286000	47753000	45951000	21773000	21504000	14156000	0	10903000	7495500	0	20075000	0	22132000	17957000	38165000	16792000	10412000	13631000	10433000	16178000	14471000	8838600	27528000	12038000	40185000	14257000	34290000				2	2	2	7.4	7.4	7.4	55.117	0	98.315
264720000	234410000	191950000	88414000	213150000	280420000	144630000	222980000	164850000	159000000	240590000	187100000	113310000	157320000	143050000	138300000	195010000	182530000	184590000	146310000	186530000	162700000	95794000	122980000	168380000	182230000	186120000	132210000	131140000	195950000	210780000	212580000	135940000	242560000	134540000	124450000	141520000	124590000				4	4	4	21.8	21.8	21.8	28.993	0	210.13
53446000	29488000	18329000	31520000	49956000	39055000	46610000	21287000	50836000	43942000	32241000	63179000	32684000	61219000	39136000	29066000	60994000	43769000	0	21805000	149490000	36267000	45401000	34302000	32077000	42713000	26093000	35194000	18012000	43082000	35377000	12453000	29353000	39814000	55443000	23451000	56047000	52386000				2	2	2	18.9	18.9	18.9	22.119	0	27.534
953360000	1392400000	1137000000	753110000	626540000	882230000	925400000	1004000000	1288200000	1388700000	692310000	733820000	915240000	919820000	1101200000	1253900000	644180000	1273100000	1235700000	760360000	1071100000	580980000	841760000	1038900000	1350300000	1003800000	1147700000	1272900000	1177100000	1094800000	1070200000	1157800000	778080000	387270000	775850000	672890000	870730000	905530000				5	5	5	40.7	40.7	40.7	17.031	0	208.53
12642000	10050000	14166000	8890300	0	0	0	11936000	0	19325000	0	5860700	4956000	5504600	0	14061000	0	0	0	0	0	0	0	4329500	3423200	1103400	1283000	0	6979500	2523000	0	2669300	21219000	23574000	24948000	15000000	13707000	0	+			1	1	1	15.1	15.1	15.1	8.5549	1	-2
180860000	197980000	126250000	478510000	301650000	318500000	104900000	141280000	211160000	195800000	533930000	330460000	66018000	244090000	170370000	256640000	56183000	0	419860000	177220000	165700000	117040000	70305000	199210000	194400000	216290000	593820000	289210000	351190000	286210000	280840000	155540000	217740000	208160000	144560000	124900000	134400000	185050000				3	3	3	24.8	24.8	24.8	25.838	0	25.499
147800000	373360000	241910000	188280000	364120000	154060000	220010000	246760000	173870000	256440000	373580000	155610000	196900000	148290000	183540000	191660000	220200000	229770000	121150000	155460000	177420000	60362000	168160000	214080000	228510000	186940000	204790000	250770000	176040000	261170000	241210000	255750000	220840000	111380000	335610000	163400000	409110000	237440000				4	4	4	35.8	35.8	35.8	17.818	0	118.31
4122000000	405960000	2796100000	6066500000	4283000000	3196100000	3876400000	4649800000	2955600000	3167800000	2384100000	2724500000	299930000	1705100000	2709600000	2630700000	3407800000	1850800000	1797700000	2822300000	2153800000	2819800000	1253900000	2429000000	2748700000	3705800000	3096600000	3869900000	2293100000	2956400000	3091100000	2761600000	2301300000	3062200000	2829800000	3148500000	2671400000	2547600000				4	4	4	24.6	24.6	24.6	21.057	0	323.31
[truncated: 2,914 more rows]
[truncated: 5 more columns]
