# Supplementary material for: Aflibercept Intervention in Experimental Branch Retinal Vein Occlusion Results in Upregulation of DnaJ Homolog Subfamily C Member 17
Source: J Ophthalmol. 2021 Mar 6;2021:6690260. doi: 10.1155/2021/6690260 (PMC7960061; doi:10.1155/2021/6690260)
Supplement: Supplementary Materials — Appendix A: unfiltered results from database search. Appendix B: all successfully identified and quantified proteins. Appendix C: test of reproducibility of the BRVO model at the molecular level. [file 6690260.f1.zip › Appendix B.xlsx]

## Sheet: Ark1
EYIN1H	EYIN2H	EYIN3H	EYIN4H	EYIN5H	EYIN6H	EYS1V	EYS2V	EYS3V	EYS4V	EYS5V	EYS6V	EYZ1H	EYZ1V	EYZ2H	EYZ2V	EYZ3H	EYZ3V	EYZ4H	EYZ4V	EYZ5H	EYZ5V	EYZ6H	EYZ6V	C: Only identified by site	C: Reverse	C: Potential contaminant	N: Peptides	N: Razor + unique peptides	N: Unique peptides	N: Sequence coverage [%]	N: Unique + razor sequence coverage [%]	N: Unique sequence coverage [%]	N: Mol. weight [kDa]	N: Q-value	N: Score	N: Intensity	N: MS/MS count	T: Protein IDs	T: Majority protein IDs	T: Fasta headers
25.5309	NaN	25.0968	26.9203	24.5925	25.2085	23.797	23.677	25.2318	24.6856	25.9332	24.7977	24.8075	25.367	26.9974	24.445	24.9436	24.3401	25.4993	25.6484	25.4804	24.8428	25.084	24.8405				4	4	4	23.6	23.6	23.6	36.9	0	172.18	892200000	73	sp|A1E295|CATB_PIG;sp|P07858|CATB_HUMAN	sp|A1E295|CATB_PIG	sp|A1E295|CATB_PIG Cathepsin B OS=Sus scrofa OX=9823 GN=CTSB PE=1 SV=1
25.3613	25.1902	25.3272	25.7545	25.1235	24.6316	25.4035	24.4338	25.7388	25.3243	25.4463	24.685	25.8264	25.913	24.421	25.1108	25.3092	25.7672	25.5024	24.7839	25.4945	24.2188	24.3625	25.1525				4	4	4	15	15	15	67.867	0	37.484	843730000	39	sp|A1L0T0|ILVBL_HUMAN	sp|A1L0T0|ILVBL_HUMAN	sp|A1L0T0|ILVBL_HUMAN Acetolactate synthase-like protein OS=Homo sapiens OX=9606 GN=ILVBL PE=1 SV=2
24.6877	25.6061	24.4941	24.6822	25.0891	27.071	24.7945	24.6462	25.5613	25.74	24.7389	25.4526	24.543	25.7669	25.9136	NaN	25.9607	26.9121	26.2815	22.1309	25.4993	25.3156	25.0719	24.6864				3	3	3	34.7	34.7	34.7	13.322	0	7.9013	1029300000	35	sp|A1XQR7|MIC13_PIG	sp|A1XQR7|MIC13_PIG	sp|A1XQR7|MIC13_PIG MICOS complex subunit MIC13 OS=Sus scrofa OX=9823 GN=MIC13 PE=3 SV=1
27.2251	27.0759	26.4632	26.544	26.5128	27.0534	27.4967	26.8173	26.2112	27.4908	24.9009	27.811	26.9342	26.6815	27.0764	28.2837	26.5537	26.5494	26.6527	26.7137	26.1795	27.1498	26.7017	26.768				4	4	4	65.2	65.2	65.2	10.803	0	23.257	4016000000	193	sp|P62304|RUXE_HUMAN;sp|A1XQR9|RUXE_PIG	sp|P62304|RUXE_HUMAN;sp|A1XQR9|RUXE_PIG	sp|P62304|RUXE_HUMAN Small nuclear ribonucleoprotein E OS=Homo sapiens OX=9606 GN=SNRPE PE=1 SV=1;sp|A1XQR9|RUXE_PIG Small nuclear ribonucleoprotein E OS=Sus scrofa OX=9823 GN=SNRPE PE=3 SV=1
25.1341	25.2333	24.4927	26.2227	25.6389	23.1413	24.8637	22.11	25.0561	25.7484	25.3434	24.8625	25.7564	25.3086	24.9802	28.341	26.4783	24.9974	25.7465	25.1476	26.2599	25.8912	25.9887	25.6079				5	5	5	40.1	40.1	40.1	29.98	0	323.31	1207600000	75	sp|A1XQU1|PSB7_PIG;sp|Q99436|PSB7_HUMAN	sp|A1XQU1|PSB7_PIG	sp|A1XQU1|PSB7_PIG Proteasome subunit beta type-7 OS=Sus scrofa OX=9823 GN=PSMB7 PE=2 SV=2
27.3517	27.0689	25.3185	27.268	25.8641	26.3304	27.6785	27.4833	25.7223	25.5908	27.3343	25.2245	26.213	25.4175	25.8062	26.9755	25.7287	25.4056	25.855	25.6709	26.085	26.9472	26.1913	26.0094				2	2	2	10.3	10.3	10.3	23.33	0	26.037	2596500000	113	sp|A1XQU3|RL14_PIG;sp|P50914|RL14_HUMAN	sp|A1XQU3|RL14_PIG;sp|P50914|RL14_HUMAN	sp|A1XQU3|RL14_PIG 60S ribosomal protein L14 OS=Sus scrofa OX=9823 GN=RPL14 PE=1 SV=1;sp|P50914|RL14_HUMAN 60S ribosomal protein L14 OS=Homo sapiens OX=9606 GN=RPL14 PE=1 SV=4
24.059	23.4422	24.2155	23.6706	24.1341	24.1381	24.1523	23.5686	24.0283	23.8009	22.0862	23.9697	23.9029	23.5705	23.4823	23.1676	23.835	24.5855	24.0765	24.4011	22.6884	23.7851	23.2988	23.268				7	7	7	33.7	33.7	33.7	47.82	0	14.167	324820000	57	sp|A1YIZ1|SPS2_PIG;sp|Q99611|SPS2_HUMAN	sp|A1YIZ1|SPS2_PIG	sp|A1YIZ1|SPS2_PIG Selenide, water dikinase 2 OS=Sus scrofa OX=9823 GN=SEPHS2 PE=2 SV=2
23.3075	24.175	22.6524	24.5565	23.1181	23.2124	23.1347	23.7645	23.059	25.1176	23.0892	NaN	23.646	23.8777	23.5167	24.1592	24.1235	24.1491	23.2408	23.848	24.3584	24.2125	23.1464	23.9307				5	5	5	14	14	14	50.098	0	8.0543	440210000	32	sp|A4Z6H0|PURA1_PIG;sp|Q8N142|PURA1_HUMAN;sp|Q8N142-2|PURA1_HUMAN	sp|A4Z6H0|PURA1_PIG	sp|A4Z6H0|PURA1_PIG Adenylosuccinate synthetase isozyme 1 OS=Sus scrofa OX=9823 GN=ADSSL1 PE=2 SV=1
23.4725	23.8437	24.1676	23.2006	23.7362	22.9233	23.7515	24.1001	23.8136	24.215	23.1954	22.9148	23.5571	23.7618	24.1038	20.5912	NaN	23.3982	23.284	23.0712	23.7022	24.1646	23.5915	22.5942				4	4	4	12.5	12.5	12.5	50.097	0	22.625	321920000	66	sp|P30520|PURA2_HUMAN;sp|A4Z6H1|PURA2_PIG	sp|P30520|PURA2_HUMAN;sp|A4Z6H1|PURA2_PIG	sp|P30520|PURA2_HUMAN Adenylosuccinate synthetase isozyme 2 OS=Homo sapiens OX=9606 GN=ADSS PE=1 SV=3;sp|A4Z6H1|PURA2_PIG Adenylosuccinate synthetase isozyme 2 OS=Sus scrofa OX=9823 GN=ADSS PE=2 SV=1
27.7941	27.8794	27.7531	27.7157	28.0217	27.9773	27.8879	28.1375	28.726	28.313	28.0688	27.9747	28.0783	28.1683	28.3173	27.9495	28.3408	28.1014	28.352	28.5525	28.1408	28.1472	28.3278	28.2904				9	9	8	51.2	51.2	45.3	35.624	0	323.31	6881100000	206	sp|A5A761|SFXN1_PIG;sp|Q9H9B4|SFXN1_HUMAN	sp|A5A761|SFXN1_PIG;sp|Q9H9B4|SFXN1_HUMAN	sp|A5A761|SFXN1_PIG Sideroflexin-1 OS=Sus scrofa OX=9823 GN=SFXN1 PE=2 SV=1;sp|Q9H9B4|SFXN1_HUMAN Sideroflexin-1 OS=Homo sapiens OX=9606 GN=SFXN1 PE=1 SV=4
24.9483	25.5698	24.9238	25.2667	25.279	24.181	25.1785	24.5015	24.5759	25.3765	24.6666	24.8601	25.1186	25.5557	24.5368	24.3008	25.7661	25.1681	24.6701	25.7417	24.7444	25.0077	25.4348	25.1525				8	8	8	29.6	29.6	29.6	64.901	0	28.875	739000000	77	sp|A5A779|PGTA_PIG;sp|Q92696|PGTA_HUMAN	sp|A5A779|PGTA_PIG;sp|Q92696|PGTA_HUMAN	sp|A5A779|PGTA_PIG Geranylgeranyl transferase type-2 subunit alpha OS=Sus scrofa OX=9823 GN=RABGGTA PE=2 SV=1;sp|Q92696|PGTA_HUMAN Geranylgeranyl transferase type-2 subunit alpha OS=Homo sapiens OX=9606 GN=RABGGTA PE=1 SV=2
24.9837	25.4056	25.6235	24.8069	23.318	25.515	25.4773	25.132	25.595	25.7295	26.797	25.3385	25.2946	24.7409	24.9537	NaN	22.837	25.4568	25.9071	26.3993	26.3086	25.3048	25.5731	24.9565				9	9	9	18.3	18.3	18.3	113.29	0	14.915	1098200000	37	sp|A5D9M6-2|BAG6_PIG;sp|A5D9M6|BAG6_PIG;sp|P46379-4|BAG6_HUMAN;sp|P46379-5|BAG6_HUMAN;sp|P46379-2|BAG6_HUMAN;sp|P46379|BAG6_HUMAN;sp|P46379-3|BAG6_HUMAN	sp|A5D9M6-2|BAG6_PIG;sp|A5D9M6|BAG6_PIG	sp|A5D9M6-2|BAG6_PIG Isoform 2 of Large proline-rich protein BAG6 OS=Sus scrofa OX=9823 GN=BAG6;sp|A5D9M6|BAG6_PIG Large proline-rich protein BAG6 OS=Sus scrofa OX=9823 GN=BAG6 PE=2 SV=1
25.0769	24.366	25.7613	25.4005	24.8783	24.7889	24.7321	25.0929	25.2588	24.9583	24.7217	25.4744	25.1942	24.9865	25.0895	25.4525	25.7304	25.7417	25.8007	25.248	24.946	24.59	25.0833	25.2542				6	6	6	36.1	36.1	36.1	41.025	0	23.942	790160000	58	sp|A5GFN6|RAEL1_PIG;sp|P78406|RAE1L_HUMAN	sp|A5GFN6|RAEL1_PIG;sp|P78406|RAE1L_HUMAN	sp|A5GFN6|RAEL1_PIG mRNA export factor OS=Sus scrofa OX=9823 GN=RAE1 PE=3 SV=1;sp|P78406|RAE1L_HUMAN mRNA export factor OS=Homo sapiens OX=9606 GN=RAE1 PE=1 SV=1
29.257	28.2232	27.0898	27.6621	27.5621	27.8212	28.617	28.2599	28.3801	28.4447	27.9001	27.8626	28.0591	27.5444	28.0672	28.0364	23.5742	28.0848	28.7352	29.3705	27.2815	28.2876	28.5673	27.5139				4	4	3	20.2	20.2	15.2	27.053	0	45.173	7158100000	61	sp|A5GFS8|VAPB_PIG;sp|O95292-2|VAPB_HUMAN;sp|O95292|VAPB_HUMAN	sp|A5GFS8|VAPB_PIG;sp|O95292-2|VAPB_HUMAN;sp|O95292|VAPB_HUMAN	sp|A5GFS8|VAPB_PIG Vesicle-associated membrane protein-associated protein B OS=Sus scrofa OX=9823 GN=VAPB PE=3 SV=1;sp|O95292-2|VAPB_HUMAN Isoform 2 of Vesicle-associated membrane protein-associated protein B/C OS=Homo sapiens OX=9606 GN=VAPB;sp|O95292|VAP
29.4373	29.6543	29.0227	28.7351	28.8967	29.5848	29.1619	29.6018	29.8412	29.3651	29.1289	29.2258	29.5906	29.3087	29.3397	29.8958	29.7684	29.3477	29.3604	29.9584	29.1986	30.0304	29.343	29.6724				14	14	14	40.3	40.3	40.3	56.809	0	323.31	18820000000	509	sp|A5GFY8|SERA_PIG;sp|O43175|SERA_HUMAN	sp|A5GFY8|SERA_PIG;sp|O43175|SERA_HUMAN	sp|A5GFY8|SERA_PIG D-3-phosphoglycerate dehydrogenase OS=Sus scrofa OX=9823 GN=PHGDH PE=3 SV=1;sp|O43175|SERA_HUMAN D-3-phosphoglycerate dehydrogenase OS=Homo sapiens OX=9606 GN=PHGDH PE=1 SV=4
25.3379	24.2001	25.2276	23.7121	23.1481	22.377	24.9913	24.7027	24.2405	22.934	22.257	23.3851	23.8585	24.0845	23.5599	24.7867	24.0585	23.9182	24.6418	24.1435	24.2863	24.2051	23.89	24.3571				12	12	12	8.6	8.6	8.6	266.38	0	54.497	493570000	78	sp|A5YKK6-2|CNOT1_HUMAN;sp|A5YKK6|CNOT1_HUMAN;sp|A5YKK6-3|CNOT1_HUMAN;sp|A5YKK6-4|CNOT1_HUMAN	sp|A5YKK6-2|CNOT1_HUMAN;sp|A5YKK6|CNOT1_HUMAN;sp|A5YKK6-3|CNOT1_HUMAN;sp|A5YKK6-4|CNOT1_HUMAN	sp|A5YKK6-2|CNOT1_HUMAN Isoform 2 of CCR4-NOT transcription complex subunit 1 OS=Homo sapiens OX=9606 GN=CNOT1;sp|A5YKK6|CNOT1_HUMAN CCR4-NOT transcription complex subunit 1 OS=Homo sapiens OX=9606 GN=CNOT1 PE=1 SV=2;sp|A5YKK6-3|CNOT1_HUMAN Isoform 3 of CC
27.91	27.3402	28.3626	27.8606	27.2584	27.943	27.4392	27.5627	27.2785	27.6892	27.5227	27.439	27.5843	27.6106	26.8653	27.1138	27.3712	26.7525	27.0281	26.9421	26.1692	27.5971	27.8236	27.6514				9	9	9	38.4	38.4	38.4	46.871	0	218.04	4801700000	224	sp|P38919|IF4A3_HUMAN;sp|A6M931|IF4A3_PIG	sp|P38919|IF4A3_HUMAN;sp|A6M931|IF4A3_PIG	sp|P38919|IF4A3_HUMAN Eukaryotic initiation factor 4A-III OS=Homo sapiens OX=9606 GN=EIF4A3 PE=1 SV=4;sp|A6M931|IF4A3_PIG Eukaryotic initiation factor 4A-III OS=Sus scrofa OX=9823 GN=EIF4A3 PE=2 SV=1
25.96	26.027	24.7533	25.8621	26.4389	25.7687	24.9834	24.016	25.7103	26.1532	25.5323	26.1139	26.1324	26.5535	24.8249	26.7913	26.1546	26.1613	26.2686	26.1782	25.5951	25.426	25.3173	26.6571				3	3	3	15.3	15.3	15.3	34.006	0	88.804	1652400000	88	sp|A6NDG6|PGP_HUMAN	sp|A6NDG6|PGP_HUMAN	sp|A6NDG6|PGP_HUMAN Glycerol-3-phosphate phosphatase OS=Homo sapiens OX=9606 GN=PGP PE=1 SV=1
25.2508	24.6551	25.9517	25.2374	25.7778	25.6765	24.8727	25.7029	24.7567	25.8167	25.7225	25.7142	25.3391	23.2874	25.349	24.0453	25.1738	24.8249	24.6031	24.9795	24.8213	25.0672	24.5067	24.7424				3	3	3	20.7	20.7	20.7	33.62	0	117.04	806220000	72	sp|A6NDU8|CE051_HUMAN	sp|A6NDU8|CE051_HUMAN	sp|A6NDU8|CE051_HUMAN UPF0600 protein C5orf51 OS=Homo sapiens OX=9606 GN=C5orf51 PE=1 SV=1
26.0076	24.8303	25.6959	25.5921	24.6323	25.4117	25.3615	24.4495	25.1199	24.9208	26.285	24.2575	24.2057	24.7701	24.9329	NaN	25.2922	25.2652	25.1835	25.0828	25.1386	24.7062	25.5363	25.1128				3	3	3	9.8	9.8	9.8	52.47	0	142.71	777610000	54	sp|A6NE02|BTBDH_HUMAN	sp|A6NE02|BTBDH_HUMAN	sp|A6NE02|BTBDH_HUMAN BTB/POZ domain-containing protein 17 OS=Homo sapiens OX=9606 GN=BTBD17 PE=3 SV=1
28.2283	27.8396	26.9273	27.4239	27.5482	27.1666	27.7985	28.4422	27.7282	29.0453	27.764	28.2797	27.7298	27.9256	27.3299	27.4654	26.8303	27.2357	27.7582	27.9072	27.1173	26.9981	27.1167	27.9263				4	2	2	10.6	6.7	6.7	45.517	0	16.182	7310000000	81	sp|A6NHL2-2|TBAL3_HUMAN;sp|A6NHL2|TBAL3_HUMAN	sp|A6NHL2-2|TBAL3_HUMAN;sp|A6NHL2|TBAL3_HUMAN	sp|A6NHL2-2|TBAL3_HUMAN Isoform 2 of Tubulin alpha chain-like 3 OS=Homo sapiens OX=9606 GN=TUBAL3;sp|A6NHL2|TBAL3_HUMAN Tubulin alpha chain-like 3 OS=Homo sapiens OX=9606 GN=TUBAL3 PE=1 SV=2
23.9578	23.6518	24.3582	22.6627	22.3772	23.0853	23.7696	24.3632	24.1435	23.7036	23.6571	23.5579	24.0322	23.3611	24.4824	24.5714	24.2587	23.9697	23.8579	22.7871	NaN	24.0704	23.1497	23.2855				6	6	6	5.6	5.6	5.6	215.74	0	8.4189	342790000	46	sp|A6NHR9-2|SMHD1_HUMAN;sp|A6NHR9|SMHD1_HUMAN;sp|A6NHR9-3|SMHD1_HUMAN	sp|A6NHR9-2|SMHD1_HUMAN;sp|A6NHR9|SMHD1_HUMAN	sp|A6NHR9-2|SMHD1_HUMAN Isoform 2 of Structural maintenance of chromosomes flexible hinge domain-containing protein 1 OS=Homo sapiens OX=9606 GN=SMCHD1;sp|A6NHR9|SMHD1_HUMAN Structural maintenance of chromosomes flexible hinge domain-containing protein 1 O
24.6269	24.9929	24.5692	23.9406	24.7477	24.821	24.3886	24.403	24.4545	25.3029	25.0609	25.3836	24.2808	24.5	24.4508	22.0669	25.5231	25.1523	25.3527	20.8922	24.2426	24.4056	24.298	24.4757				5	5	5	30.1	30.1	30.1	36.056	0	41.517	673810000	56	sp|A6NHX0|CAST2_HUMAN	sp|A6NHX0|CAST2_HUMAN	sp|A6NHX0|CAST2_HUMAN Cytosolic arginine sensor for mTORC1 subunit 2 OS=Homo sapiens OX=9606 GN=CASTOR2 PE=1 SV=3
22.3525	22.9274	22.8612	22.6228	23.8082	23.0326	22.4502	22.9336	22.6713	22.9744	22.6556	22.699	22.7679	23.2811	22.8311	22.5954	21.7968	22.2498	23.3661	24.1204	23.1989	23.3256	22.5418	22.9982				4	4	4	3.6	3.6	3.6	230.53	0	10.055	196640000	38	sp|A7KAX9|RHG32_HUMAN;sp|A7KAX9-2|RHG32_HUMAN;sp|A7KAX9-3|RHG32_HUMAN	sp|A7KAX9|RHG32_HUMAN;sp|A7KAX9-2|RHG32_HUMAN;sp|A7KAX9-3|RHG32_HUMAN	sp|A7KAX9|RHG32_HUMAN Rho GTPase-activating protein 32 OS=Homo sapiens OX=9606 GN=ARHGAP32 PE=1 SV=1;sp|A7KAX9-2|RHG32_HUMAN Isoform 2 of Rho GTPase-activating protein 32 OS=Homo sapiens OX=9606 GN=ARHGAP32;sp|A7KAX9-3|RHG32_HUMAN Isoform 3 of Rho GTPase-a
25.6552	25.2739	26.0295	24.9545	25.4544	24.963	25.4574	24.6788	25.2888	25.92	24.907	25.5536	25.112	24.9458	25.5123	25.8152	25.5256	25.8665	25.379	26.3912	26.0558	25.7301	25.563	25.2998				6	6	6	39.9	39.9	39.9	35.865	0	67.905	1341800000	86	sp|A7TX81|CSN6_PIG;sp|Q7L5N1|CSN6_HUMAN	sp|A7TX81|CSN6_PIG;sp|Q7L5N1|CSN6_HUMAN	sp|A7TX81|CSN6_PIG COP9 signalosome complex subunit 6 OS=Sus scrofa OX=9823 GN=COPS6 PE=2 SV=1;sp|Q7L5N1|CSN6_HUMAN COP9 signalosome complex subunit 6 OS=Homo sapiens OX=9606 GN=COPS6 PE=1 SV=1
25.3822	NaN	26.5502	25.8902	23.1592	22.5876	24.2667	NaN	24.7689	24.0995	26.9329	24.0838	26.184	24.9739	26.2787	NaN	24.657	24.5078	24.3978	25.3384	25.4415	23.3554	22.3946	21.8953				9	8	8	19.1	17.4	17.4	80.327	0	80.753	689660000	43	sp|A7VK00|MX2_PIG	sp|A7VK00|MX2_PIG	sp|A7VK00|MX2_PIG Interferon-induced GTP-binding protein Mx2 OS=Sus scrofa OX=9823 GN=MX2 PE=2 SV=1
26.9138	26.6321	27.1644	27.5188	27.4258	26.6742	26.9726	26.4549	27.6477	27.3253	27.2484	27.1217	26.8274	26.6772	27.0255	27.4085	26.9221	26.8957	26.7732	26.9267	26.6195	26.6759	27.2091	27.0315				10	10	10	39.7	39.7	39.7	46.268	0	140.38	3181800000	202	sp|Q9BT78|CSN4_HUMAN;sp|A7Y521|CSN4_PIG;sp|Q9BT78-2|CSN4_HUMAN	sp|Q9BT78|CSN4_HUMAN;sp|A7Y521|CSN4_PIG;sp|Q9BT78-2|CSN4_HUMAN	sp|Q9BT78|CSN4_HUMAN COP9 signalosome complex subunit 4 OS=Homo sapiens OX=9606 GN=COPS4 PE=1 SV=1;sp|A7Y521|CSN4_PIG COP9 signalosome complex subunit 4 OS=Sus scrofa OX=9823 GN=COPS4 PE=2 SV=1;sp|Q9BT78-2|CSN4_HUMAN Isoform 2 of COP9 signalosome complex s
26.7622	26.3089	24.9789	26.6249	26.5411	26.905	25.6335	26.6636	26.2405	27.3114	25.7411	26.1317	27.0169	26.8072	25.2566	27.9954	27.2902	26.8153	26.1014	27.3572	26.9697	26.8915	26.2705	26.6947				4	4	4	51.5	51.5	51.5	21.547	0	247.75	2071000000	60	sp|A9CQL8|PXL2B_PIG	sp|A9CQL8|PXL2B_PIG	sp|A9CQL8|PXL2B_PIG Prostamide/prostaglandin F synthase OS=Sus scrofa OX=9823 GN=PRXL2B PE=1 SV=1
25.0088	25.3666	22.9821	24.7807	22.9873	24.8694	24.1439	23.9334	23.5405	23.5475	24.2921	24.0814	24.5481	24.9704	24.2608	25.0571	26.0248	24.4356	NaN	22.1362	24.4371	25.0547	25.5604	24.8886				4	4	4	20.2	20.2	20.2	37.35	0	76.643	822970000	59	sp|A9YUB1|CHRD1_PIG;sp|Q9UHD1-2|CHRD1_HUMAN;sp|Q9UHD1|CHRD1_HUMAN	sp|A9YUB1|CHRD1_PIG;sp|Q9UHD1-2|CHRD1_HUMAN;sp|Q9UHD1|CHRD1_HUMAN	sp|A9YUB1|CHRD1_PIG Cysteine and histidine-rich domain-containing protein 1 OS=Sus scrofa OX=9823 GN=CHORDC1 PE=2 SV=1;sp|Q9UHD1-2|CHRD1_HUMAN Isoform 2 of Cysteine and histidine-rich domain-containing protein 1 OS=Homo sapiens OX=9606 GN=CHORDC1;sp|Q9UHD1
25.6946	25.0393	24.7809	25.8787	25.5401	26.1323	25.1358	25.348	26.2057	25.076	25.2585	26.4029	26.369	25.5246	25.8084	26.3367	NaN	26.0052	25.9176	25.637	24.5619	25.8579	25.881	25.8615				5	5	5	12.4	12.4	12.4	83.989	0	39.375	1247400000	64	sp|B0KYV5|LIMA1_PIG;sp|B0KYV5-2|LIMA1_PIG	sp|B0KYV5|LIMA1_PIG;sp|B0KYV5-2|LIMA1_PIG	sp|B0KYV5|LIMA1_PIG LIM domain and actin-binding protein 1 OS=Sus scrofa OX=9823 GN=LIMA1 PE=2 SV=1;sp|B0KYV5-2|LIMA1_PIG Isoform 2 of LIM domain and actin-binding protein 1 OS=Sus scrofa OX=9823 GN=LIMA1
26.4835	25.8714	26.1723	27.0905	25.7144	24.8959	26.7138	26.022	26.3073	25.7013	25.3295	25.4865	26.0647	25.9477	25.7122	26.3097	28.094	25.6708	26.4351	25.8887	25.8523	26.338	26.578	26.5017				8	8	8	11.4	11.4	11.4	105.34	0	98.568	1848500000	80	sp|Q99613|EIF3C_HUMAN;sp|B5ME19|EIFCL_HUMAN;sp|Q99613-2|EIF3C_HUMAN	sp|Q99613|EIF3C_HUMAN;sp|B5ME19|EIFCL_HUMAN;sp|Q99613-2|EIF3C_HUMAN	sp|Q99613|EIF3C_HUMAN Eukaryotic translation initiation factor 3 subunit C OS=Homo sapiens OX=9606 GN=EIF3C PE=1 SV=1;sp|B5ME19|EIFCL_HUMAN Eukaryotic translation initiation factor 3 subunit C-like protein OS=Homo sapiens OX=9606 GN=EIF3CL PE=3 SV=1;sp|Q99
25.9151	26.0549	25.2086	26.0675	26.2859	26.673	25.8663	25.4005	25.9088	26.0305	25.8781	26.6352	26.3996	25.7753	25.693	25.4561	26.3659	26.8689	26.746	26.4695	26.1323	25.8526	25.7886	25.4075				10	10	10	35.3	35.3	35.3	54.28	0	323.31	1752600000	172	sp|B6CVD7|ERO1A_PIG;sp|Q96HE7|ERO1A_HUMAN	sp|B6CVD7|ERO1A_PIG;sp|Q96HE7|ERO1A_HUMAN	sp|B6CVD7|ERO1A_PIG ERO1-like protein alpha OS=Sus scrofa OX=9823 GN=ERO1A PE=2 SV=1;sp|Q96HE7|ERO1A_HUMAN ERO1-like protein alpha OS=Homo sapiens OX=9606 GN=ERO1A PE=1 SV=2
25.6378	26.3713	24.878	25.3315	25.2753	26.1876	25.7978	26.3124	26.5694	25.3432	25.168	25.3585	25.5796	26.1576	25.4274	26.0369	26.2869	25.7126	25.57	27.4243	24.7882	25.9547	25.96	27.0092				4	4	4	38.5	38.5	38.5	18.518	0.00034364	4.2811	1871500000	55	sp|D0VWV4|C560_PIG	sp|D0VWV4|C560_PIG	sp|D0VWV4|C560_PIG Succinate dehydrogenase cytochrome b560 subunit, mitochondrial OS=Sus scrofa OX=9823 GN=SDHC PE=1 SV=2
28.6226	28.4599	28.098	28.4106	28.3349	28.1589	28.4163	28.0694	28.6595	28.0139	28.6768	27.8288	28.3866	28.1177	28.1018	28.1527	28.388	28.471	28.3748	28.5025	28.3405	28.3761	28.3066	28.4559				26	26	26	45.9	45.9	45.9	107.12	0	323.31	8529900000	621	sp|D2SW95|COPB_PIG;sp|P53618|COPB_HUMAN	sp|D2SW95|COPB_PIG;sp|P53618|COPB_HUMAN	sp|D2SW95|COPB_PIG Coatomer subunit beta OS=Sus scrofa OX=9823 GN=COPB1 PE=2 SV=1;sp|P53618|COPB_HUMAN Coatomer subunit beta OS=Homo sapiens OX=9606 GN=COPB1 PE=1 SV=3
26.4096	26.8181	26.2946	26.0048	26.273	26.3122	26.29	26.2854	26.7261	26.946	26.0431	27.2388	26.5267	26.3292	26.6388	27.3315	26.9007	26.2376	27.0141	26.8094	26.7141	26.2684	26.3229	26.8725				19	12	4	26.6	15.4	5.8	112.21	0	323.31	2569600000	232	sp|D2WKD8|AT1A2_PIG	sp|D2WKD8|AT1A2_PIG	sp|D2WKD8|AT1A2_PIG Sodium/potassium-transporting ATPase subunit alpha-2 OS=Sus scrofa OX=9823 GN=ATP1A2 PE=1 SV=1
27.7239	26.9693	28.3645	27.683	27.5422	28.0296	27.8302	27.4883	27.7696	27.5859	27.4246	27.1665	27.7829	27.5256	27.2555	26.5171	27.0453	26.8667	27.8572	27.806	28.1739	27.5793	28.1945	27.4815				5	5	5	32.6	32.6	32.6	23.384	0	300.58	5038400000	128	sp|Q13765|NACA_HUMAN;sp|E9PAV3-2|NACAM_HUMAN;sp|E9PAV3|NACAM_HUMAN;sp|Q9BZK3|NACP1_HUMAN	sp|Q13765|NACA_HUMAN;sp|E9PAV3-2|NACAM_HUMAN;sp|E9PAV3|NACAM_HUMAN	sp|Q13765|NACA_HUMAN Nascent polypeptide-associated complex subunit alpha OS=Homo sapiens OX=9606 GN=NACA PE=1 SV=1;sp|E9PAV3-2|NACAM_HUMAN Isoform skNAC-2 of Nascent polypeptide-associated complex subunit alpha, muscle-specific form OS=Homo sapiens OX=960
29.2373	28.6885	29.4006	28.9119	28.7818	28.913	28.845	29.0095	29.1027	29.2059	28.7081	28.9957	28.5922	28.8662	28.8608	28.5302	28.985	29.0437	28.6677	29.1071	28.6493	28.7549	28.8143	28.9982				16	16	16	47.8	47.8	47.8	59.234	0	323.31	12315000000	608	sp|F1RKQ4|TKFC_PIG;sp|Q3LXA3-2|TKFC_HUMAN;sp|Q3LXA3|TKFC_HUMAN	sp|F1RKQ4|TKFC_PIG	sp|F1RKQ4|TKFC_PIG Triokinase/FMN cyclase OS=Sus scrofa OX=9823 GN=TKFC PE=1 SV=2
27.2675	25.6955	26.6614	27.2801	26.9303	27.1398	26.7393	26.8115	25.7575	27.1006	27.1588	27.4482	27.0271	27.1384	27.4188	26.4899	27.9242	27.2004	27.5711	27.0177	26.7718	27.1589	26.8481	26.1993				11	11	10	40.2	40.2	38.7	59.474	0	323.31	3469700000	188	sp|F1RQM2|AGM1_PIG	sp|F1RQM2|AGM1_PIG	sp|F1RQM2|AGM1_PIG Phosphoacetylglucosamine mutase OS=Sus scrofa OX=9823 GN=PGM3 PE=1 SV=2
27.0181	27.2102	26.7532	25.972	24.2535	25.7805	26.3198	26.6518	25.2266	24.7287	26.5483	25.9687	25.9721	26.1969	26.5015	NaN	26.0221	26.084	25.9086	25.4431	26.6756	26.8082	25.9491	26.4479				6	6	6	12.9	12.9	12.9	80.237	0	109.05	2022700000	123	sp|F1S584|CTL2_PIG;sp|Q8IWA5-3|CTL2_HUMAN;sp|Q8IWA5|CTL2_HUMAN;sp|Q8IWA5-2|CTL2_HUMAN	sp|F1S584|CTL2_PIG;sp|Q8IWA5-3|CTL2_HUMAN;sp|Q8IWA5|CTL2_HUMAN;sp|Q8IWA5-2|CTL2_HUMAN	sp|F1S584|CTL2_PIG Choline transporter-like protein 2 OS=Sus scrofa OX=9823 GN=SLC44A2 PE=3 SV=1;sp|Q8IWA5-3|CTL2_HUMAN Isoform 3 of Choline transporter-like protein 2 OS=Homo sapiens OX=9606 GN=SLC44A2;sp|Q8IWA5|CTL2_HUMAN Choline transporter-like protein
28.2824	28.2142	28.3009	28.2121	28.6304	28.4669	27.9263	28.3517	28.4682	28.386	28.1857	28.6334	28.3264	28.3649	28.3669	29.1056	28.768	28.5236	28.6742	28.7437	28.9007	28.2701	28.3204	28.4299				23	23	11	48.5	48.5	28.9	104.31	0	323.31	8859500000	537	sp|F1SPM8|AAK1_PIG	sp|F1SPM8|AAK1_PIG	sp|F1SPM8|AAK1_PIG AP2-associated protein kinase 1 OS=Sus scrofa OX=9823 GN=AAK1 PE=2 SV=2
25.3604	25.7047	24.4198	25.6367	24.8547	24.4571	25.3	24.0543	23.9133	25.8435	25.1366	25.1094	25.1364	25.4219	23.5629	25.2728	25.0999	24.4692	25.5014	25.5945	25.1543	24.8491	25.3866	24.4606				7	7	7	14.7	14.7	14.7	75.042	0	107.38	907590000	91	sp|O00139-2|KIF2A_HUMAN;sp|O00139-1|KIF2A_HUMAN;sp|O00139-5|KIF2A_HUMAN;sp|O00139|KIF2A_HUMAN;sp|O00139-4|KIF2A_HUMAN	sp|O00139-2|KIF2A_HUMAN;sp|O00139-1|KIF2A_HUMAN;sp|O00139-5|KIF2A_HUMAN;sp|O00139|KIF2A_HUMAN;sp|O00139-4|KIF2A_HUMAN	sp|O00139-2|KIF2A_HUMAN Isoform 2 of Kinesin-like protein KIF2A OS=Homo sapiens OX=9606 GN=KIF2A;sp|O00139-1|KIF2A_HUMAN Isoform 1 of Kinesin-like protein KIF2A OS=Homo sapiens OX=9606 GN=KIF2A;sp|O00139-5|KIF2A_HUMAN Isoform 5 of Kinesin-like protein KIF2
27.1509	27.9931	26.8787	27.2185	26.6487	27.2853	27.3872	27.9366	28.4034	27.681	26.4208	27.294	27.4654	27.3147	27.1672	27.4313	26.681	27.0058	27.255	27.3368	27.292	27.6869	26.9162	26.7336				4	4	4	20.3	20.3	20.3	27.041	0	10.262	4748200000	74	sp|O00154-2|BACH_HUMAN;sp|O00154-3|BACH_HUMAN;sp|O00154-6|BACH_HUMAN;sp|O00154-4|BACH_HUMAN;sp|O00154-5|BACH_HUMAN;sp|O00154-7|BACH_HUMAN;sp|O00154|BACH_HUMAN	sp|O00154-2|BACH_HUMAN;sp|O00154-3|BACH_HUMAN;sp|O00154-6|BACH_HUMAN;sp|O00154-4|BACH_HUMAN;sp|O00154-5|BACH_HUMAN;sp|O00154-7|BACH_HUMAN;sp|O00154|BACH_HUMAN	sp|O00154-2|BACH_HUMAN Isoform 2 of Cytosolic acyl coenzyme A thioester hydrolase OS=Homo sapiens OX=9606 GN=ACOT7;sp|O00154-3|BACH_HUMAN Isoform 3 of Cytosolic acyl coenzyme A thioester hydrolase OS=Homo sapiens OX=9606 GN=ACOT7;sp|O00154-6|BACH_HUMAN Iso
24.6561	23.5045	24.2022	24.4093	24.2276	23.0383	23.2367	23.2122	23.7487	24.3523	23.9464	24.7938	24.2146	23.8493	24.1572	24.5157	23.6624	23.2959	23.9009	24.1246	23.8261	24.0647	24.0186	23.9137				7	7	7	13.9	13.9	13.9	117.91	0	32.021	362840000	48	sp|O00159-2|MYO1C_HUMAN;sp|O00159-3|MYO1C_HUMAN;sp|O00159|MYO1C_HUMAN	sp|O00159-2|MYO1C_HUMAN;sp|O00159-3|MYO1C_HUMAN;sp|O00159|MYO1C_HUMAN	sp|O00159-2|MYO1C_HUMAN Isoform 2 of Unconventional myosin-Ic OS=Homo sapiens OX=9606 GN=MYO1C;sp|O00159-3|MYO1C_HUMAN Isoform 3 of Unconventional myosin-Ic OS=Homo sapiens OX=9606 GN=MYO1C;sp|O00159|MYO1C_HUMAN Unconventional myosin-Ic OS=Homo sapiens OX=
25.9144	24.9395	25.5295	25.837	25.096	25.716	25.425	25.5113	25.2216	25.7737	24.5465	25.7757	24.2928	24.3162	25.5183	25.2361	24.6798	24.8196	25.6453	26.1996	25.7541	25.2637	25.3768	25.4097				8	8	8	20.9	20.9	20.9	72.453	0	14.319	919870000	61	sp|O00178|GTPB1_HUMAN	sp|O00178|GTPB1_HUMAN	sp|O00178|GTPB1_HUMAN GTP-binding protein 1 OS=Homo sapiens OX=9606 GN=GTPBP1 PE=1 SV=3
26.1126	25.7201	26.9601	27.7495	26.5348	26.4753	26.6512	25.3899	25.9473	27.4882	26.5013	27.9096	26.4931	28.175	26.8497	25.9262	26.3352	27.693	26.2137	26.322	27.0281	26.2325	26.4589	26.3403				10	10	10	15.8	15.8	15.8	104.64	0	323.31	1937300000	123	sp|O00192|ARVC_HUMAN;sp|O00192-2|ARVC_HUMAN	sp|O00192|ARVC_HUMAN;sp|O00192-2|ARVC_HUMAN	sp|O00192|ARVC_HUMAN Armadillo repeat protein deleted in velo-cardio-facial syndrome OS=Homo sapiens OX=9606 GN=ARVCF PE=1 SV=1;sp|O00192-2|ARVC_HUMAN Isoform Short of Armadillo repeat protein deleted in velo-cardio-facial syndrome OS=Homo sapiens OX=9606
26.5022	27.2207	25.6847	25.2159	NaN	25.6517	26.9846	26.7343	26.5391	24.8136	24.2044	25.2359	25.1766	25.305	23.9281	26.7788	26.1262	25.6508	25.7087	26.0811	25.9624	26.3402	26.9619	27.1211				2	2	2	10.5	10.5	10.5	23.705	0	7.7881	2265100000	48	sp|O00217|NDUS8_HUMAN	sp|O00217|NDUS8_HUMAN	sp|O00217|NDUS8_HUMAN NADH dehydrogenase [ubiquinone] iron-sulfur protein 8, mitochondrial OS=Homo sapiens OX=9606 GN=NDUFS8 PE=1 SV=1
27.7954	28.1182	27.1604	27.8743	27.6155	27.7372	27.878	27.634	27.6304	27.5399	27.9712	28.3221	27.3364	27.4122	27.7174	27.3608	27.649	27.9882	27.5272	27.9317	27.2219	27.9214	27.8345	27.9244				14	14	14	50	50	50	47.463	0	323.31	5670000000	349	sp|O00231|PSD11_HUMAN;sp|O00231-2|PSD11_HUMAN	sp|O00231|PSD11_HUMAN;sp|O00231-2|PSD11_HUMAN	sp|O00231|PSD11_HUMAN 26S proteasome non-ATPase regulatory subunit 11 OS=Homo sapiens OX=9606 GN=PSMD11 PE=1 SV=3;sp|O00231-2|PSD11_HUMAN Isoform 2 of 26S proteasome non-ATPase regulatory subunit 11 OS=Homo sapiens OX=9606 GN=PSMD11
27.6446	27.1398	27.3316	25.8746	27.5263	27.2795	27.1474	26.9067	26.3608	27.0486	26.9516	27.276	26.4723	26.3795	27.2772	27.1772	27.5377	27.0206	26.8634	26.2909	27.1009	27.159	26.6011	27.0261				10	10	10	32.5	32.5	32.5	52.904	0	323.31	3068900000	232	sp|O00232|PSD12_HUMAN;sp|O00232-2|PSD12_HUMAN	sp|O00232|PSD12_HUMAN;sp|O00232-2|PSD12_HUMAN	sp|O00232|PSD12_HUMAN 26S proteasome non-ATPase regulatory subunit 12 OS=Homo sapiens OX=9606 GN=PSMD12 PE=1 SV=3;sp|O00232-2|PSD12_HUMAN Isoform 2 of 26S proteasome non-ATPase regulatory subunit 12 OS=Homo sapiens OX=9606 GN=PSMD12
25.3359	25.0177	24.2123	22.615	24.3779	24.3075	24.6083	25.3064	24.423	23.7768	25.2481	25.9448	24.4746	25.2375	25.0599	25.1428	24.1003	24.2418	24.4811	24.4456	24.5748	25.0343	24.995	24.8011				11	11	11	19.4	19.4	19.4	120.5	0	102.56	730250000	100	sp|O00267-2|SPT5H_HUMAN;sp|O00267|SPT5H_HUMAN	sp|O00267-2|SPT5H_HUMAN;sp|O00267|SPT5H_HUMAN	sp|O00267-2|SPT5H_HUMAN Isoform 2 of Transcription elongation factor SPT5 OS=Homo sapiens OX=9606 GN=SUPT5H;sp|O00267|SPT5H_HUMAN Transcription elongation factor SPT5 OS=Homo sapiens OX=9606 GN=SUPT5H PE=1 SV=1
24.6504	24.4939	24.0034	24.7087	24.8723	24.5641	24.0973	24.0588	24.8392	24.2542	24.2308	24.7723	23.9655	25.3754	23.9689	25.7409	24.8466	24.3844	24.5929	25.1126	24.471	24.4185	24.3404	24.59				4	4	4	13.3	13.3	13.3	54.666	0	17.12	578320000	57	sp|O00294-2|TULP1_HUMAN;sp|O00294|TULP1_HUMAN	sp|O00294-2|TULP1_HUMAN;sp|O00294|TULP1_HUMAN	sp|O00294-2|TULP1_HUMAN Isoform 2 of Tubby-related protein 1 OS=Homo sapiens OX=9606 GN=TULP1;sp|O00294|TULP1_HUMAN Tubby-related protein 1 OS=Homo sapiens OX=9606 GN=TULP1 PE=1 SV=3
27.6656	26.3355	29.1679	27.6994	27.6655	27.55	27.5779	27.5334	27.2514	27.8487	27.5401	27.7231	27.439	27.0636	27.9438	27.4654	27.2419	27.0701	26.9759	27.2389	27.5513	26.7442	27.0733	26.2235				8	8	8	48.5	48.5	48.5	26.922	0	152.32	4292900000	163	sp|O00299|CLIC1_HUMAN;sp|Q29238|CLIC1_PIG	sp|O00299|CLIC1_HUMAN;sp|Q29238|CLIC1_PIG	sp|O00299|CLIC1_HUMAN Chloride intracellular channel protein 1 OS=Homo sapiens OX=9606 GN=CLIC1 PE=1 SV=4;sp|Q29238|CLIC1_PIG Chloride intracellular channel protein 1 (Fragment) OS=Sus scrofa OX=9823 GN=CLIC1 PE=2 SV=2
27.3209	27.4675	27.5565	27.3505	27.4814	26.7897	27.6084	27.5055	27.906	27.4411	26.8856	27.6346	27.1629	26.9393	27.3809	26.7656	27.7196	27.1107	27.2682	27.0534	26.7045	27.2561	27.3258	27.6362				8	8	8	29.4	29.4	29.4	37.563	0	317.59	3707400000	137	sp|O00303|EIF3F_HUMAN	sp|O00303|EIF3F_HUMAN	sp|O00303|EIF3F_HUMAN Eukaryotic translation initiation factor 3 subunit F OS=Homo sapiens OX=9606 GN=EIF3F PE=1 SV=1
26.2584	27.0672	25.8361	25.8995	26.3117	26.4115	25.9748	26.488	26.6328	27.3301	25.8244	27.073	26.2117	26.0046	25.5561	27.2941	25.7748	26.2922	25.884	26.8176	25.6775	26.4927	26.2696	26.5764				5	5	5	13.4	13.4	13.4	51.459	0	123.97	2140600000	124	sp|O00330-3|ODPX_HUMAN;sp|O00330|ODPX_HUMAN;sp|O00330-2|ODPX_HUMAN	sp|O00330-3|ODPX_HUMAN;sp|O00330|ODPX_HUMAN;sp|O00330-2|ODPX_HUMAN	sp|O00330-3|ODPX_HUMAN Isoform 3 of Pyruvate dehydrogenase protein X component, mitochondrial OS=Homo sapiens OX=9606 GN=PDHX;sp|O00330|ODPX_HUMAN Pyruvate dehydrogenase protein X component, mitochondrial OS=Homo sapiens OX=9606 GN=PDHX PE=1 SV=3;sp|O00330
24.5182	24.5935	23.6267	23.5097	24.4903	24.4686	24.9842	24.8386	23.9498	NaN	25.6806	24.758	25.393	25.6336	25.25	25.1047	24.8324	24.5052	25.5566	25.9561	25.6966	24.6215	25.3224	25.2724				3	3	3	35.3	35.3	35.3	20.747	0	18.514	705910000	54	sp|O00399|DCTN6_HUMAN	sp|O00399|DCTN6_HUMAN	sp|O00399|DCTN6_HUMAN Dynactin subunit 6 OS=Homo sapiens OX=9606 GN=DCTN6 PE=1 SV=1
28.8061	28.7957	28.7412	28.6501	28.2615	28.484	28.9823	28.5308	28.3932	29.2529	28.6041	28.9	28.8443	28.3619	28.5004	28.023	29.0603	28.6601	28.8083	28.4496	28.9284	28.3828	28.6795	28.7561				28	28	26	45.9	45.9	44.2	123.63	0	323.31	10443000000	567	sp|O00410|IPO5_HUMAN;sp|O00410-3|IPO5_HUMAN;sp|O00410-2|IPO5_HUMAN	sp|O00410|IPO5_HUMAN;sp|O00410-3|IPO5_HUMAN;sp|O00410-2|IPO5_HUMAN	sp|O00410|IPO5_HUMAN Importin-5 OS=Homo sapiens OX=9606 GN=IPO5 PE=1 SV=4;sp|O00410-3|IPO5_HUMAN Isoform 3 of Importin-5 OS=Homo sapiens OX=9606 GN=IPO5;sp|O00410-2|IPO5_HUMAN Isoform 2 of Importin-5 OS=Homo sapiens OX=9606 GN=IPO5
28.2759	28.8183	27.827	28.0711	28.2361	28.4814	28.3838	28.6595	28.5441	28.3415	28.3365	28.5595	28.1133	28.7675	28.3059	28.1765	28.3473	28.0402	28.173	27.9971	27.6594	28.5958	28.3176	28.3667				19	19	19	43.8	43.8	43.8	78.099	0	323.31	8704000000	570	sp|O00429-4|DNM1L_HUMAN;sp|O00429-5|DNM1L_HUMAN;sp|O00429-3|DNM1L_HUMAN;sp|O00429-2|DNM1L_HUMAN;sp|O00429|DNM1L_HUMAN;sp|O00429-8|DNM1L_HUMAN;sp|O00429-6|DNM1L_HUMAN;sp|O00429-7|DNM1L_HUMAN	sp|O00429-4|DNM1L_HUMAN;sp|O00429-5|DNM1L_HUMAN;sp|O00429-3|DNM1L_HUMAN;sp|O00429-2|DNM1L_HUMAN;sp|O00429|DNM1L_HUMAN;sp|O00429-8|DNM1L_HUMAN;sp|O00429-6|DNM1L_HUMAN;sp|O00429-7|DNM1L_HUMAN	sp|O00429-4|DNM1L_HUMAN Isoform 3 of Dynamin-1-like protein OS=Homo sapiens OX=9606 GN=DNM1L;sp|O00429-5|DNM1L_HUMAN Isoform 5 of Dynamin-1-like protein OS=Homo sapiens OX=9606 GN=DNM1L;sp|O00429-3|DNM1L_HUMAN Isoform 2 of Dynamin-1-like protein OS=Homo sa
26.6151	26.1469	25.0105	26.5787	23.9065	26.4831	26.8576	26.2319	26.0363	25.6571	25.9679	25.0703	25.9002	26.1501	26.1415	26.1091	NaN	26.7193	25.4485	25.7018	24.2879	26.7635	25.9862	26.6187				4	4	4	15.6	15.6	15.6	39.336	0	17.576	1842100000	93	sp|O00442|RTCA_HUMAN;sp|O00442-2|RTCA_HUMAN	sp|O00442|RTCA_HUMAN;sp|O00442-2|RTCA_HUMAN	sp|O00442|RTCA_HUMAN RNA 3-terminal phosphate cyclase OS=Homo sapiens OX=9606 GN=RTCA PE=1 SV=1;sp|O00442-2|RTCA_HUMAN Isoform 2 of RNA 3-terminal phosphate cyclase OS=Homo sapiens OX=9606 GN=RTCA
24.1511	22.7419	23.745	23.0428	23.4394	NaN	24.4525	22.2132	23.1003	24.5198	NaN	22.7919	23.0701	23.3303	25.0341	NaN	NaN	23.7067	22.114	19.5183	23.8352	23.9626	23.3922	22.7835				3	3	3	1.9	1.9	1.9	214.84	0.00064454	3.4675	352600000	47	sp|O00468-6|AGRIN_HUMAN;sp|O00468-3|AGRIN_HUMAN;sp|O00468-5|AGRIN_HUMAN;sp|O00468-4|AGRIN_HUMAN;sp|O00468-7|AGRIN_HUMAN;sp|O00468|AGRIN_HUMAN;sp|O00468-2|AGRIN_HUMAN	sp|O00468-6|AGRIN_HUMAN;sp|O00468-3|AGRIN_HUMAN;sp|O00468-5|AGRIN_HUMAN;sp|O00468-4|AGRIN_HUMAN;sp|O00468-7|AGRIN_HUMAN;sp|O00468|AGRIN_HUMAN;sp|O00468-2|AGRIN_HUMAN	sp|O00468-6|AGRIN_HUMAN Isoform 6 of Agrin OS=Homo sapiens OX=9606 GN=AGRN;sp|O00468-3|AGRIN_HUMAN Isoform 3 of Agrin OS=Homo sapiens OX=9606 GN=AGRN;sp|O00468-5|AGRIN_HUMAN Isoform 5 of Agrin OS=Homo sapiens OX=9606 GN=AGRN;sp|O00468-4|AGRIN_HUMAN Isoform
22.7336	22.6594	NaN	23.0126	21.5224	22.7169	22.7294	23.1033	20.5667	22.7584	23.1042	22.578	21.7543	22.8404	23.3104	NaN	21.6676	23.1708	21.2575	22.7345	22.7761	22.6572	22.0005	23.1269				4	4	4	10.6	10.6	10.6	81.852	0	15.807	173050000	28	sp|O00471|EXOC5_HUMAN	sp|O00471|EXOC5_HUMAN	sp|O00471|EXOC5_HUMAN Exocyst complex component 5 OS=Homo sapiens OX=9606 GN=EXOC5 PE=1 SV=1
27.2801	26.4893	27.3577	27.4252	27.5892	27.3874	26.6606	27.1423	27.2019	28.1225	27.3016	27.2802	27.4476	27.2778	26.4584	NaN	26.0023	26.4308	27.1176	25.691	27.0242	27.074	27.4735	27.042				6	6	6	44.8	44.8	44.8	34.577	0	184.32	3712000000	133	sp|O00487|PSDE_HUMAN	sp|O00487|PSDE_HUMAN	sp|O00487|PSDE_HUMAN 26S proteasome non-ATPase regulatory subunit 14 OS=Homo sapiens OX=9606 GN=PSMD14 PE=1 SV=1
26.9307	26.7201	26.3146	27.0651	27.2989	27.2567	26.5853	26.4987	26.6907	26.4612	26.4046	27.6346	26.5028	27.1507	27.3175	24.8912	25.9655	26.8631	26.5524	27.76	26.721	26.4173	26.5457	27.0825				8	8	8	32.3	32.3	32.3	45.563	0	65.12	2631100000	156	sp|O00499-9|BIN1_HUMAN;sp|O00499-10|BIN1_HUMAN;sp|O00499-7|BIN1_HUMAN;sp|O00499-8|BIN1_HUMAN;sp|O00499-4|BIN1_HUMAN;sp|O00499-6|BIN1_HUMAN;sp|O00499-11|BIN1_HUMAN;sp|O00499-3|BIN1_HUMAN;sp|O00499-2|BIN1_HUMAN;sp|O00499-5|BIN1_HUMAN;sp|O00499|BIN1_HUMAN	sp|O00499-9|BIN1_HUMAN;sp|O00499-10|BIN1_HUMAN;sp|O00499-7|BIN1_HUMAN;sp|O00499-8|BIN1_HUMAN;sp|O00499-4|BIN1_HUMAN;sp|O00499-6|BIN1_HUMAN;sp|O00499-11|BIN1_HUMAN;sp|O00499-3|BIN1_HUMAN;sp|O00499-2|BIN1_HUMAN;sp|O00499-5|BIN1_HUMAN;sp|O00499|BIN1_HUMAN	sp|O00499-9|BIN1_HUMAN Isoform BIN1-10-13 of Myc box-dependent-interacting protein 1 OS=Homo sapiens OX=9606 GN=BIN1;sp|O00499-10|BIN1_HUMAN Isoform BIN1-13 of Myc box-dependent-interacting protein 1 OS=Homo sapiens OX=9606 GN=BIN1;sp|O00499-7|BIN1_HUMAN I
25.7913	26.1936	26.8796	25.4695	25.6457	25.7049	25.9131	25.5034	25.4842	25.7915	25.3747	26.3335	26.0452	25.3971	25.9589	27.0174	24.7351	24.6311	25.7291	24.9583	25.5113	25.804	25.3865	25.0325				9	8	8	27.3	24.6	24.6	57.81	0	316.82	1280300000	146	sp|O00505|IMA4_HUMAN	sp|O00505|IMA4_HUMAN	sp|O00505|IMA4_HUMAN Importin subunit alpha-4 OS=Homo sapiens OX=9606 GN=KPNA3 PE=1 SV=2
26.1958	26.2411	26.1812	25.827	26.0908	26.3184	26.1665	26.0694	26.508	26.1903	26.373	26.4291	26.4809	26.6101	26.9657	25.7653	27.0161	26.1603	26.1677	27.2554	26.5581	25.9365	26.324	26.6963				5	5	5	5.5	5.5	5.5	135.07	0	20.907	1885100000	107	sp|O00533|NCHL1_HUMAN;sp|O00533-2|NCHL1_HUMAN	sp|O00533|NCHL1_HUMAN;sp|O00533-2|NCHL1_HUMAN	sp|O00533|NCHL1_HUMAN Neural cell adhesion molecule L1-like protein OS=Homo sapiens OX=9606 GN=CHL1 PE=1 SV=4;sp|O00533-2|NCHL1_HUMAN Isoform 2 of Neural cell adhesion molecule L1-like protein OS=Homo sapiens OX=9606 GN=CHL1
26.2827	26.6392	26.3287	26.5454	26.2577	25.9915	26.1643	26.9315	26.6058	25.5819	25.8169	26.4758	25.404	25.7119	26.1781	26.9485	25.4102	26.6378	25.7528	25.8412	25.1967	26.4916	26.2283	27.0391				10	10	10	13.4	13.4	13.4	134.77	0	164.11	2414400000	174	sp|O00562-2|PITM1_HUMAN;sp|O00562|PITM1_HUMAN	sp|O00562-2|PITM1_HUMAN;sp|O00562|PITM1_HUMAN	sp|O00562-2|PITM1_HUMAN Isoform 2 of Membrane-associated phosphatidylinositol transfer protein 1 OS=Homo sapiens OX=9606 GN=PITPNM1;sp|O00562|PITM1_HUMAN Membrane-associated phosphatidylinositol transfer protein 1 OS=Homo sapiens OX=9606 GN=PITPNM1 PE=1 SV
27.1547	26.8006	26.661	25.8819	26.9085	26.4446	27.0991	26.5294	26.968	25.8022	26.8336	27.727	26.6498	26.7641	26.5574	26.5433	26.9813	26.7498	26.6171	26.9833	26.1336	27.0618	26.6663	27.5248				9	9	9	21.5	21.5	21.5	66.049	0	63.696	2836400000	111	sp|O00567|NOP56_HUMAN	sp|O00567|NOP56_HUMAN	sp|O00567|NOP56_HUMAN Nucleolar protein 56 OS=Homo sapiens OX=9606 GN=NOP56 PE=1 SV=4
28.1698	28.203	27.7764	27.6921	27.752	27.7708	28.0183	28.068	28.1023	28.2162	27.8593	27.9544	28.1683	27.9814	27.4286	28.7932	27.5846	27.7332	27.7304	27.5513	27.9831	28.2165	28.086	28.2705				13	12	4	34.4	32.8	12.4	73.243	0	323.31	6150800000	338	sp|O00571|DDX3X_HUMAN;sp|O00571-2|DDX3X_HUMAN	sp|O00571|DDX3X_HUMAN;sp|O00571-2|DDX3X_HUMAN	sp|O00571|DDX3X_HUMAN ATP-dependent RNA helicase DDX3X OS=Homo sapiens OX=9606 GN=DDX3X PE=1 SV=3;sp|O00571-2|DDX3X_HUMAN Isoform 2 of ATP-dependent RNA helicase DDX3X OS=Homo sapiens OX=9606 GN=DDX3X
26.7418	26.7414	26.3045	26.6738	26.7806	26.9316	26.6153	26.9902	26.8555	27.0798	26.8326	26.5789	27.1192	25.0429	27.0255	26.4594	27.2768	26.4481	27.4035	26.6644	27.0378	26.2853	26.841	26.7105				10	10	9	44.3	44.3	41.7	57.886	0	323.31	2421100000	155	sp|O00629|IMA3_HUMAN	sp|O00629|IMA3_HUMAN	sp|O00629|IMA3_HUMAN Importin subunit alpha-3 OS=Homo sapiens OX=9606 GN=KPNA4 PE=1 SV=1
26.1626	25.6439	26.7591	27.1211	25.9218	26.6119	26.1738	26.1082	26.4895	26.3909	26.4565	26.4615	25.8478	26.5288	26.7977	26.1087	26.5692	25.7409	26.2576	26.8418	26.7312	25.8691	26.3494	25.7571				7	7	7	40.7	40.7	40.7	35.144	0	249.8	1764100000	185	sp|O00743|PPP6_HUMAN;sp|O00743-3|PPP6_HUMAN;sp|O00743-2|PPP6_HUMAN	sp|O00743|PPP6_HUMAN;sp|O00743-3|PPP6_HUMAN;sp|O00743-2|PPP6_HUMAN	sp|O00743|PPP6_HUMAN Serine/threonine-protein phosphatase 6 catalytic subunit OS=Homo sapiens OX=9606 GN=PPP6C PE=1 SV=1;sp|O00743-3|PPP6_HUMAN Isoform 3 of Serine/threonine-protein phosphatase 6 catalytic subunit OS=Homo sapiens OX=9606 GN=PPP6C;sp|O00743
24.0011	18.8257	28.3401	26.5109	23.6428	21.0969	27.2507	18.7067	21.5278	24.6771	28.2223	22.5772	20.0393	19.6988	19.6244	NaN	19.9505	19.6075	25.456	18.5246	29.4819	21.2617	22.7957	20.9072				9	9	9	19.9	19.9	19.9	104.62	0	112	1362100000	67	sp|O02668|ITIH2_PIG;sp|P19823|ITIH2_HUMAN;CON__Q9TRI1	sp|O02668|ITIH2_PIG	sp|O02668|ITIH2_PIG Inter-alpha-trypsin inhibitor heavy chain H2 OS=Sus scrofa OX=9823 GN=ITIH2 PE=2 SV=1
33.791	33.685	33.4436	33.7529	33.6119	33.3659	33.5564	33.5288	34.1641	33.6376	33.4043	33.7974	34.1018	34.0969	33.688	34.225	34.2523	34.1914	33.8243	33.9818	33.9058	33.5517	33.9189	33.9905				29	29	2	48.8	48.8	5.3	84.774	0	323.31	408610000000	3468	sp|O02705|HS90A_PIG;sp|Q14568|HS902_HUMAN;sp|Q58FG0|HS905_HUMAN	sp|O02705|HS90A_PIG	sp|O02705|HS90A_PIG Heat shock protein HSP 90-alpha OS=Sus scrofa OX=9823 GN=HSP90AA1 PE=2 SV=3
25.0737	23.894	26.1985	25.1836	25.3617	25.1679	25.6756	24.1984	25.1085	26.1602	25.6678	25.6627	25.4781	25.278	26.2626	26.0219	25.0188	24.5068	24.5255	25.4038	25.347	24.6978	24.8889	24.3297				8	8	8	17.9	17.9	17.9	99.059	0	31.063	847890000	66	sp|O02799|STAT2_PIG;sp|P52630-4|STAT2_HUMAN;sp|P52630|STAT2_HUMAN	sp|O02799|STAT2_PIG	sp|O02799|STAT2_PIG Signal transducer and activator of transcription 2 OS=Sus scrofa OX=9823 GN=STAT2 PE=2 SV=1
25.562	25.7529	25.8533	26.008	26.2506	25.632	25.9412	26.2878	26.1013	25.9603	23.8119	26.3755	26.2883	26.3374	26.2329	27.2658	26.3292	26.3915	26.3313	25.8286	22.3808	25.2465	25.4832	26.477				4	4	4	8.7	8.7	8.7	61.877	0	319.78	1989400000	85	sp|O14531|DPYL4_HUMAN	sp|O14531|DPYL4_HUMAN	sp|O14531|DPYL4_HUMAN Dihydropyrimidinase-related protein 4 OS=Homo sapiens OX=9606 GN=DPYSL4 PE=1 SV=2
24.4148	23.7631	25.2866	24.6591	24.8484	24.6503	23.0868	24.9793	23.82	25.6998	25.7572	23.9478	24.8589	24.4248	24.1019	NaN	24.2207	26.79	23.6259	23.5819	25.7739	24.4088	24.3867	23.8023				2	2	2	16.2	16.2	16.2	17.135	0.0003391	4.0794	772660000	46	sp|O14558|HSPB6_HUMAN	sp|O14558|HSPB6_HUMAN	sp|O14558|HSPB6_HUMAN Heat shock protein beta-6 OS=Homo sapiens OX=9606 GN=HSPB6 PE=1 SV=2
25.9357	26.1688	25.2745	24.4781	24.4888	26.8224	25.6922	26.4756	26.7371	23.7487	25.7705	26.1958	25.7703	25.6665	26.2083	27.1145	25.1538	26.1317	26.3075	26.551	25.2453	25.7267	26.3841	26.2708				2	2	2	9.6	9.6	9.6	17.417	0.00035486	4.8266	2432800000	56	sp|O14561|ACPM_HUMAN	sp|O14561|ACPM_HUMAN	sp|O14561|ACPM_HUMAN Acyl carrier protein, mitochondrial OS=Homo sapiens OX=9606 GN=NDUFAB1 PE=1 SV=3
23.4359	23.9771	23.4709	23.7805	21.0274	23.1884	24.9228	23.146	24.9466	NaN	23.8223	23.1454	23.1136	23.6475	21.2328	NaN	NaN	23.3488	23.5714	23.4026	24.1011	23.9155	23.3821	24.1878				3	3	3	12.9	12.9	12.9	33.382	0	76.623	365220000	54	sp|O14562|UBFD1_HUMAN	sp|O14562|UBFD1_HUMAN	sp|O14562|UBFD1_HUMAN Ubiquitin domain-containing protein UBFD1 OS=Homo sapiens OX=9606 GN=UBFD1 PE=1 SV=2
25.382	25.0176	24.1867	25.1939	26.2531	25.643	24.8396	25.26	24.5692	23.7288	26.0797	25.0101	24.877	25.6088	24.0464	24.9364	25.0359	23.602	23.9892	25.5018	23.9671	25.1181	24.7687	24.694				8	8	8	26.8	26.8	26.8	70.789	0	130.68	913710000	119	sp|O14576-2|DC1I1_HUMAN;sp|O14576-4|DC1I1_HUMAN;sp|O14576-3|DC1I1_HUMAN;sp|O14576|DC1I1_HUMAN;sp|O14576-5|DC1I1_HUMAN	sp|O14576-2|DC1I1_HUMAN;sp|O14576-4|DC1I1_HUMAN;sp|O14576-3|DC1I1_HUMAN;sp|O14576|DC1I1_HUMAN;sp|O14576-5|DC1I1_HUMAN	sp|O14576-2|DC1I1_HUMAN Isoform 2 of Cytoplasmic dynein 1 intermediate chain 1 OS=Homo sapiens OX=9606 GN=DYNC1I1;sp|O14576-4|DC1I1_HUMAN Isoform 4 of Cytoplasmic dynein 1 intermediate chain 1 OS=Homo sapiens OX=9606 GN=DYNC1I1;sp|O14576-3|DC1I1_HUMAN Isof
27.4308	27.0333	27.1226	26.9733	27.0886	26.7234	27.1332	27.3141	27.1918	27.052	26.676	27.0411	26.9882	27.4983	26.7517	27.8179	26.8635	27.1217	27.0043	26.3305	26.8848	26.6934	26.6651	27.2711				12	12	12	14.7	14.7	14.7	130.16	0	36.165	3528600000	169	sp|O14617|AP3D1_HUMAN;sp|O14617-5|AP3D1_HUMAN;sp|O14617-4|AP3D1_HUMAN;sp|O14617-2|AP3D1_HUMAN;sp|O14617-3|AP3D1_HUMAN	sp|O14617|AP3D1_HUMAN;sp|O14617-5|AP3D1_HUMAN;sp|O14617-4|AP3D1_HUMAN;sp|O14617-2|AP3D1_HUMAN;sp|O14617-3|AP3D1_HUMAN	sp|O14617|AP3D1_HUMAN AP-3 complex subunit delta-1 OS=Homo sapiens OX=9606 GN=AP3D1 PE=1 SV=1;sp|O14617-5|AP3D1_HUMAN Isoform 5 of AP-3 complex subunit delta-1 OS=Homo sapiens OX=9606 GN=AP3D1;sp|O14617-4|AP3D1_HUMAN Isoform 4 of AP-3 complex subunit delta
26.8953	26.0289	25.5752	26.6808	25.8113	25.9155	26.6306	26.5933	27.5689	25.3752	25.8981	26.1429	25.9264	26.026	26.6509	26.2672	24.6246	26.2757	25.9027	26.0989	26.3743	26.4755	26.3349	26.62				3	3	3	20.8	20.8	20.8	18.624	0	41.901	3053300000	119	sp|O14735-3|CDIPT_HUMAN;sp|O14735|CDIPT_HUMAN;sp|O14735-2|CDIPT_HUMAN	sp|O14735-3|CDIPT_HUMAN;sp|O14735|CDIPT_HUMAN	sp|O14735-3|CDIPT_HUMAN Isoform 3 of CDP-diacylglycerol--inositol 3-phosphatidyltransferase OS=Homo sapiens OX=9606 GN=CDIPT;sp|O14735|CDIPT_HUMAN CDP-diacylglycerol--inositol 3-phosphatidyltransferase OS=Homo sapiens OX=9606 GN=CDIPT PE=1 SV=1
23.9736	23.3306	24.4568	25.0025	23.3465	19.7539	24.347	22.9796	24.2723	24.1957	23.3063	23.1314	24.1659	24.1718	24.9569	24.2925	18.3742	NaN	24.9355	24.611	23.797	24.0916	24.3698	23.7917				2	2	2	19.2	19.2	19.2	14.285	0	87.915	498100000	30	sp|O14737|PDCD5_HUMAN;sp|O14737-2|PDCD5_HUMAN	sp|O14737|PDCD5_HUMAN;sp|O14737-2|PDCD5_HUMAN	sp|O14737|PDCD5_HUMAN Programmed cell death protein 5 OS=Homo sapiens OX=9606 GN=PDCD5 PE=1 SV=3;sp|O14737-2|PDCD5_HUMAN Isoform 2 of Programmed cell death protein 5 OS=Homo sapiens OX=9606 GN=PDCD5
26.9458	26.4075	27.1261	27.4859	27.1718	27.0552	26.8509	27.2173	27.1565	27.447	27.5026	27.1691	27.0645	27.1437	26.8829	27.157	27.3865	26.8371	27.3486	26.9102	27.5124	27.0142	26.9385	26.8927				11	11	11	34.7	34.7	34.7	72.683	0	165.77	3188500000	218	sp|O14744|ANM5_HUMAN;sp|O14744-2|ANM5_HUMAN;sp|O14744-5|ANM5_HUMAN;sp|O14744-3|ANM5_HUMAN;sp|O14744-4|ANM5_HUMAN	sp|O14744|ANM5_HUMAN;sp|O14744-2|ANM5_HUMAN;sp|O14744-5|ANM5_HUMAN;sp|O14744-3|ANM5_HUMAN;sp|O14744-4|ANM5_HUMAN	sp|O14744|ANM5_HUMAN Protein arginine N-methyltransferase 5 OS=Homo sapiens OX=9606 GN=PRMT5 PE=1 SV=4;sp|O14744-2|ANM5_HUMAN Isoform 2 of Protein arginine N-methyltransferase 5 OS=Homo sapiens OX=9606 GN=PRMT5;sp|O14744-5|ANM5_HUMAN Isoform 5 of Protein a
25.7885	26.0848	25.56	26.1029	27.2263	26.9185	25.375	26.5845	26.4739	27.0714	26.9598	26.7753	26.9119	26.9346	25.0534	28.47	26.7575	26.7037	26.5192	26.9866	25.8356	26.6398	26.7732	26.558				6	6	6	20.8	20.8	20.8	43.566	0	221.2	2714200000	96	sp|O14775|GNB5_HUMAN;sp|O14775-2|GNB5_HUMAN;sp|O14775-3|GNB5_HUMAN	sp|O14775|GNB5_HUMAN;sp|O14775-2|GNB5_HUMAN;sp|O14775-3|GNB5_HUMAN	sp|O14775|GNB5_HUMAN Guanine nucleotide-binding protein subunit beta-5 OS=Homo sapiens OX=9606 GN=GNB5 PE=1 SV=2;sp|O14775-2|GNB5_HUMAN Isoform 2 of Guanine nucleotide-binding protein subunit beta-5 OS=Homo sapiens OX=9606 GN=GNB5;sp|O14775-3|GNB5_HUMAN Is
25.8301	25.7478	25.4389	24.9022	25.2909	25.4554	25.0663	25.1168	26.148	22.6002	25.3123	26.0819	25.7006	24.7812	24.9325	24.934	NaN	24.2885	25.0575	23.7699	25.1195	25.2623	24.5727	25.0934				5	5	5	5.9	5.9	5.9	121.69	0	18.062	870810000	57	sp|O14776-2|TCRG1_HUMAN;sp|O14776|TCRG1_HUMAN	sp|O14776-2|TCRG1_HUMAN;sp|O14776|TCRG1_HUMAN	sp|O14776-2|TCRG1_HUMAN Isoform 2 of Transcription elongation regulator 1 OS=Homo sapiens OX=9606 GN=TCERG1;sp|O14776|TCRG1_HUMAN Transcription elongation regulator 1 OS=Homo sapiens OX=9606 GN=TCERG1 PE=1 SV=2
25.3534	25.6035	25.5632	25.7422	26.0076	25.5516	25.538	24.8682	24.9837	25.4752	25.7841	26.0752	25.2893	25.143	25.3918	25.514	25.3709	24.4028	25.343	25.7034	25.0942	24.8483	25.2729	24.9804				15	11	11	35.4	27.8	27.8	100.41	0	39.259	981620000	115	sp|O14787-2|TNPO2_HUMAN;sp|O14787|TNPO2_HUMAN	sp|O14787-2|TNPO2_HUMAN;sp|O14787|TNPO2_HUMAN	sp|O14787-2|TNPO2_HUMAN Isoform 2 of Transportin-2 OS=Homo sapiens OX=9606 GN=TNPO2;sp|O14787|TNPO2_HUMAN Transportin-2 OS=Homo sapiens OX=9606 GN=TNPO2 PE=1 SV=3
24.2313	24.5445	NaN	23.5359	23.7901	25.0292	24.1087	24.307	24.0846	23.6874	24.1111	23.6229	24.2405	24.2706	23.6031	23.8302	24.2197	23.5246	24.1041	23.566	24.3892	24.5908	23.9635	24.6415				4	4	4	31.7	31.7	31.7	23.846	0	9.2782	436570000	41	sp|O14807|RASM_HUMAN	sp|O14807|RASM_HUMAN	sp|O14807|RASM_HUMAN Ras-related protein M-Ras OS=Homo sapiens OX=9606 GN=MRAS PE=1 SV=2
28.1104	27.2908	26.8656	28.0639	27.9376	27.4687	28.0869	28.345	28.0077	28.3099	28.3058	28.3741	27.7115	27.3558	28.1309	27.5334	28.0659	27.8038	27.7144	28.5527	26.9747	27.7213	27.7371	28.0096				5	5	5	33.9	33.9	33.9	27.887	0	193.81	6163700000	177	sp|O14818|PSA7_HUMAN;sp|O14818-4|PSA7_HUMAN;sp|O14818-2|PSA7_HUMAN;sp|Q8TAA3-2|PSMA8_HUMAN;sp|Q8TAA3-5|PSMA8_HUMAN;sp|Q8TAA3|PSMA8_HUMAN	sp|O14818|PSA7_HUMAN;sp|O14818-4|PSA7_HUMAN	sp|O14818|PSA7_HUMAN Proteasome subunit alpha type-7 OS=Homo sapiens OX=9606 GN=PSMA7 PE=1 SV=1;sp|O14818-4|PSA7_HUMAN Isoform 3 of Proteasome subunit alpha type-7 OS=Homo sapiens OX=9606 GN=PSMA7
24.2764	24.1925	24.6127	23.4978	NaN	22.5616	24.4534	24.8669	26.2514	NaN	24.2985	24.5289	23.9869	24.5351	24.434	25.6223	24.6578	24.8751	24.4591	24.9624	24.808	24.0038	24.9827	24.5356				2	2	2	11.2	11.2	11.2	35.201	0	5.7536	591700000	25	sp|O14828-2|SCAM3_HUMAN;sp|O14828|SCAM3_HUMAN	sp|O14828-2|SCAM3_HUMAN;sp|O14828|SCAM3_HUMAN	sp|O14828-2|SCAM3_HUMAN Isoform 2 of Secretory carrier-associated membrane protein 3 OS=Homo sapiens OX=9606 GN=SCAMP3;sp|O14828|SCAM3_HUMAN Secretory carrier-associated membrane protein 3 OS=Homo sapiens OX=9606 GN=SCAMP3 PE=1 SV=3
23.5957	23.8754	NaN	24.1278	24.0202	23.3843	24.1755	23.6469	23.9647	23.4176	23.9123	23.8345	23.548	22.6832	23.7041	23.5931	23.5467	23.9227	23.6984	23.5	23.4408	23.3305	23.4782	24.6663				6	6	6	8	8	8	137.46	0	12.088	337700000	37	sp|O14841|OPLA_HUMAN	sp|O14841|OPLA_HUMAN	sp|O14841|OPLA_HUMAN 5-oxoprolinase OS=Homo sapiens OX=9606 GN=OPLAH PE=1 SV=3
24.799	24.4661	23.4358	24.8506	24.8241	23.7064	23.6555	24.3662	NaN	25.4224	23.6593	23.9021	24.4234	24.4109	25.556	24.995	23.8737	25.2234	23.2097	24.6587	25.0525	24.1167	24.1283	24.5027				3	2	2	20.8	15.7	15.7	26.071	0	38.962	516470000	30	sp|O14908-2|GIPC1_HUMAN;sp|O14908|GIPC1_HUMAN	sp|O14908-2|GIPC1_HUMAN;sp|O14908|GIPC1_HUMAN	sp|O14908-2|GIPC1_HUMAN Isoform 2 of PDZ domain-containing protein GIPC1 OS=Homo sapiens OX=9606 GN=GIPC1;sp|O14908|GIPC1_HUMAN PDZ domain-containing protein GIPC1 OS=Homo sapiens OX=9606 GN=GIPC1 PE=1 SV=2
26.3719	26.8992	25.508	26.2206	25.6218	26.0607	25.8877	26.8496	25.3985	25.2989	25.3505	25.4508	26.4224	26.9938	25.1467	25.9053	24.3945	NaN	26.1478	26.3216	NaN	25.6158	26.2406	26.8474				3	3	3	6.3	6.3	6.3	55.056	0	12.791	1911000000	69	sp|O14926|FSCN2_HUMAN;sp|O14926-2|FSCN2_HUMAN	sp|O14926|FSCN2_HUMAN;sp|O14926-2|FSCN2_HUMAN	sp|O14926|FSCN2_HUMAN Fascin-2 OS=Homo sapiens OX=9606 GN=FSCN2 PE=1 SV=1;sp|O14926-2|FSCN2_HUMAN Isoform 2 of Fascin-2 OS=Homo sapiens OX=9606 GN=FSCN2
25.8733	25.5364	25.9444	25.8767	25.663	25.4218	25.6214	26.4149	25.5374	24.7561	25.6916	25.5958	26.0988	26.135	25.5092	25.0863	26.1834	26.336	24.1316	25.6905	25.7149	25.9545	25.8549	25.9685				13	13	13	27.6	27.6	27.6	102.16	0	56.775	1424400000	97	sp|O14936-4|CSKP_HUMAN;sp|O14936-6|CSKP_HUMAN;sp|O14936-2|CSKP_HUMAN;sp|O14936|CSKP_HUMAN;sp|O14936-3|CSKP_HUMAN;sp|O14936-5|CSKP_HUMAN	sp|O14936-4|CSKP_HUMAN;sp|O14936-6|CSKP_HUMAN;sp|O14936-2|CSKP_HUMAN;sp|O14936|CSKP_HUMAN;sp|O14936-3|CSKP_HUMAN;sp|O14936-5|CSKP_HUMAN	sp|O14936-4|CSKP_HUMAN Isoform 4 of Peripheral plasma membrane protein CASK OS=Homo sapiens OX=9606 GN=CASK;sp|O14936-6|CSKP_HUMAN Isoform 6 of Peripheral plasma membrane protein CASK OS=Homo sapiens OX=9606 GN=CASK;sp|O14936-2|CSKP_HUMAN Isoform 2 of Peri
24.2238	24.413	23.4467	24.8333	23.9727	25.2521	22.5488	24.2725	23.0042	24.6337	23.2863	NaN	23.36	23.9463	24.7911	24.4145	24.7373	23.5237	24.2554	24.5502	23.6015	24.6938	24.5988	24.4546				5	5	5	14.3	14.3	14.3	76.375	0	21.502	338640000	41	sp|O14964-2|HGS_HUMAN;sp|O14964|HGS_HUMAN	sp|O14964-2|HGS_HUMAN;sp|O14964|HGS_HUMAN	sp|O14964-2|HGS_HUMAN Isoform 2 of Hepatocyte growth factor-regulated tyrosine kinase substrate OS=Homo sapiens OX=9606 GN=HGS;sp|O14964|HGS_HUMAN Hepatocyte growth factor-regulated tyrosine kinase substrate OS=Homo sapiens OX=9606 GN=HGS PE=1 SV=1
29.1594	28.984	28.7857	29.0104	28.9892	28.7504	29.1134	28.8762	28.6251	29.1599	28.9135	29.4332	28.6978	28.7605	28.77	29.1854	28.9478	28.8269	29.1437	28.6014	28.7492	28.868	28.7409	28.9766				29	29	29	42.6	42.6	42.6	123.38	0	323.31	13370000000	879	sp|O14980|XPO1_HUMAN	sp|O14980|XPO1_HUMAN	sp|O14980|XPO1_HUMAN Exportin-1 OS=Homo sapiens OX=9606 GN=XPO1 PE=1 SV=1
23.4877	23.5296	22.9709	24.0467	23.4772	23.2436	23.327	23.4203	23.2736	23.4767	23.2883	23.9915	23.5621	23.5007	24.1546	NaN	24.2487	24.3797	23.4545	24.4374	22.3059	23.8485	24.1838	24.9559				15	9	9	9.3	6.9	6.9	268.31	0	19.751	392500000	64	sp|O15020-2|SPTN2_HUMAN;sp|O15020|SPTN2_HUMAN	sp|O15020-2|SPTN2_HUMAN;sp|O15020|SPTN2_HUMAN	sp|O15020-2|SPTN2_HUMAN Isoform 2 of Spectrin beta chain, non-erythrocytic 2 OS=Homo sapiens OX=9606 GN=SPTBN2;sp|O15020|SPTN2_HUMAN Spectrin beta chain, non-erythrocytic 2 OS=Homo sapiens OX=9606 GN=SPTBN2 PE=1 SV=3
24.63	23.7201	24.8513	24.6381	24.4958	24.4715	23.9401	24.0968	NaN	24.8551	24.7234	24.7432	24.5685	24.1899	24.9537	NaN	24.7952	24.1526	24.6087	24.4205	24.3586	24.013	24.4341	24.1765				9	9	9	9	9	9	205.12	0	43.395	455240000	64	sp|O15031|PLXB2_HUMAN;sp|O60486|PLXC1_HUMAN;sp|Q9Y4D7|PLXD1_HUMAN	sp|O15031|PLXB2_HUMAN	sp|O15031|PLXB2_HUMAN Plexin-B2 OS=Homo sapiens OX=9606 GN=PLXNB2 PE=1 SV=3
24.8368	25.0047	24.7423	24.1739	25.1446	24.5102	24.5065	25.238	24.3657	24.8803	25.3753	24.4796	24.5624	24.78	24.6331	26.1252	24.2853	22.9377	24.45	24.7317	24.8935	24.7957	24.7395	24.349				6	6	6	9.8	9.8	9.8	118.23	0	28.088	646370000	76	sp|O15042-2|SR140_HUMAN;sp|O15042|SR140_HUMAN;sp|O15042-3|SR140_HUMAN	sp|O15042-2|SR140_HUMAN;sp|O15042|SR140_HUMAN;sp|O15042-3|SR140_HUMAN	sp|O15042-2|SR140_HUMAN Isoform 2 of U2 snRNP-associated SURP motif-containing protein OS=Homo sapiens OX=9606 GN=U2SURP;sp|O15042|SR140_HUMAN U2 snRNP-associated SURP motif-containing protein OS=Homo sapiens OX=9606 GN=U2SURP PE=1 SV=2;sp|O15042-3|SR140_H
27.977	27.4064	28.1537	28.3946	27.54	27.6986	27.8926	27.4429	27.7803	28.2039	27.7676	27.5953	27.8324	27.4297	28.2751	25.7763	27.6946	28.0956	27.46	27.559	28.9783	26.9785	27.2944	27.4939				14	14	14	37.4	37.4	37.4	82.223	0	243.86	5277400000	321	sp|O15075|DCLK1_HUMAN;sp|O15075-2|DCLK1_HUMAN;sp|O15075-4|DCLK1_HUMAN;sp|O15075-3|DCLK1_HUMAN	sp|O15075|DCLK1_HUMAN;sp|O15075-2|DCLK1_HUMAN;sp|O15075-4|DCLK1_HUMAN;sp|O15075-3|DCLK1_HUMAN	sp|O15075|DCLK1_HUMAN Serine/threonine-protein kinase DCLK1 OS=Homo sapiens OX=9606 GN=DCLK1 PE=1 SV=2;sp|O15075-2|DCLK1_HUMAN Isoform 1 of Serine/threonine-protein kinase DCLK1 OS=Homo sapiens OX=9606 GN=DCLK1;sp|O15075-4|DCLK1_HUMAN Isoform 4 of Serine/t
26.7811	26.5234	26.3935	24.733	24.1837	24.8756	27.2975	27.0546	26.6395	26.2011	26.002	26.1115	25.0143	26.4841	26.7246	26.3417	26.9952	26.1121	26.1385	26.7651	26.5926	26.0886	27.3953	26.5669				5	5	5	34	34	34	34.333	0	258.09	2599100000	65	sp|O15144|ARPC2_HUMAN	sp|O15144|ARPC2_HUMAN	sp|O15144|ARPC2_HUMAN Actin-related protein 2/3 complex subunit 2 OS=Homo sapiens OX=9606 GN=ARPC2 PE=1 SV=1
25.4242	25.0925	25.251	24.4026	24.9961	25.2039	25.7516	25.381	24.775	25.1891	25.6849	25.0848	24.479	24.7892	25.5989	25.197	24.9808	22.9155	24.3832	24.4663	25.5441	25.211	25.4146	25.0917				2	2	2	13.5	13.5	13.5	20.546	0	49.229	948030000	55	sp|O15145|ARPC3_HUMAN	sp|O15145|ARPC3_HUMAN	sp|O15145|ARPC3_HUMAN Actin-related protein 2/3 complex subunit 3 OS=Homo sapiens OX=9606 GN=ARPC3 PE=1 SV=3
25.956	26.2547	26.6927	25.4371	24.7125	26.0315	26.8992	25.8845	24.9517	25.3088	26.8615	25.5355	25.778	25.6541	26.5168	25.4955	24.9772	24.6674	25.7587	25.225	25.0574	26.1742	26.9561	26.3886				3	2	2	13.9	9.9	9.9	23.818	0	29.525	1935300000	89	sp|O15173|PGRC2_HUMAN;sp|O15173-2|PGRC2_HUMAN	sp|O15173|PGRC2_HUMAN;sp|O15173-2|PGRC2_HUMAN	sp|O15173|PGRC2_HUMAN Membrane-associated progesterone receptor component 2 OS=Homo sapiens OX=9606 GN=PGRMC2 PE=1 SV=1;sp|O15173-2|PGRC2_HUMAN Isoform 2 of Membrane-associated progesterone receptor component 2 OS=Homo sapiens OX=9606 GN=PGRMC2
24.3449	25.0474	25.6847	25.0938	25.1389	25.3576	24.9709	25.3352	25.0704	24.9491	23.7647	25.503	24.5286	25.69	24.7255	25.2372	24.8293	25.3584	25.0575	24.8422	24.4791	25.3224	24.6247	24.5956				5	5	5	42.6	42.6	42.6	14.582	0	40.076	867320000	58	sp|O15212|PFD6_HUMAN	sp|O15212|PFD6_HUMAN	sp|O15212|PFD6_HUMAN Prefoldin subunit 6 OS=Homo sapiens OX=9606 GN=PFDN6 PE=1 SV=1
25.9512	25.6538	25.6198	25.2564	25.0752	25.58	25.5212	26.0572	24.7898	26.0799	25.3107	25.226	25.3275	25.4957	25.4666	24.9352	25.7013	25.4547	25.3633	25.7601	25.2826	25.7846	25.5531	25.015				5	5	5	41.5	41.5	41.5	17.97	0	212.56	1117900000	166	sp|O15260-2|SURF4_HUMAN;sp|O15260|SURF4_HUMAN;sp|O15260-3|SURF4_HUMAN	sp|O15260-2|SURF4_HUMAN;sp|O15260|SURF4_HUMAN;sp|O15260-3|SURF4_HUMAN	sp|O15260-2|SURF4_HUMAN Isoform 2 of Surfeit locus protein 4 OS=Homo sapiens OX=9606 GN=SURF4;sp|O15260|SURF4_HUMAN Surfeit locus protein 4 OS=Homo sapiens OX=9606 GN=SURF4 PE=1 SV=3;sp|O15260-3|SURF4_HUMAN Isoform 3 of Surfeit locus protein 4 OS=Homo sapi
25.5438	25.3833	25.4464	25.7673	25.8734	25.9326	25.0842	25.4563	24.9003	25.1412	25.0526	26.2687	25.2258	25.9742	25.6459	26.0173	25.6215	25.7146	24.7495	25.2253	25.8209	25.9236	25.7859	25.4794				11	11	11	18.3	18.3	18.3	115.7	0	69.762	1229500000	129	sp|O15294-3|OGT1_HUMAN;sp|Q27HV0|OGT1_PIG;sp|O15294|OGT1_HUMAN;sp|O15294-2|OGT1_HUMAN;sp|O15294-4|OGT1_HUMAN	sp|O15294-3|OGT1_HUMAN;sp|Q27HV0|OGT1_PIG;sp|O15294|OGT1_HUMAN;sp|O15294-2|OGT1_HUMAN;sp|O15294-4|OGT1_HUMAN	sp|O15294-3|OGT1_HUMAN Isoform 1 of UDP-N-acetylglucosamine--peptide N-acetylglucosaminyltransferase 110 kDa subunit OS=Homo sapiens OX=9606 GN=OGT;sp|Q27HV0|OGT1_PIG UDP-N-acetylglucosamine--peptide N-acetylglucosaminyltransferase 110 kDa subunit OS=Sus s
24.7024	25.6034	25.0952	25.1684	25.8675	25.66	23.8548	24.3164	25.6759	25.8974	25.1758	25.6142	26.1782	25.8896	27.3213	27.5651	26.0734	26.6596	25.8137	26.1582	25.2598	25.4048	24.891	25.5321				4	4	4	14.4	14.4	14.4	67.113	0	44.432	1390800000	62	sp|O15354|GPR37_HUMAN	sp|O15354|GPR37_HUMAN	sp|O15354|GPR37_HUMAN Prosaposin receptor GPR37 OS=Homo sapiens OX=9606 GN=GPR37 PE=1 SV=2
23.7972	23.5416	22.7214	NaN	23.4189	23.0587	23.4656	23.061	22.7885	23.7339	23.8906	23.3753	23.4065	23.9031	23.4903	24.2358	22.6847	22.5562	NaN	NaN	23.2279	23.2634	23.4442	23.1567				3	3	3	10.6	10.6	10.6	59.271	0.00036792	5.5669	210050000	21	sp|O15355|PPM1G_HUMAN	sp|O15355|PPM1G_HUMAN	sp|O15355|PPM1G_HUMAN Protein phosphatase 1G OS=Homo sapiens OX=9606 GN=PPM1G PE=1 SV=1
25.2286	25.343	21.7601	24.9259	23.9058	24.8087	25.3854	24.6941	26.2499	24.861	25.3871	25.1142	24.6034	24.6183	25.0144	25.5712	24.4236	25.2055	24.6549	23.4568	25.8128	24.0321	24.2245	25.3809				7	7	7	29.5	29.5	29.5	58.14	0	19.525	779780000	94	sp|O15371-2|EIF3D_HUMAN;sp|O15371-3|EIF3D_HUMAN;sp|O15371|EIF3D_HUMAN	sp|O15371-2|EIF3D_HUMAN;sp|O15371-3|EIF3D_HUMAN;sp|O15371|EIF3D_HUMAN	sp|O15371-2|EIF3D_HUMAN Isoform 2 of Eukaryotic translation initiation factor 3 subunit D OS=Homo sapiens OX=9606 GN=EIF3D;sp|O15371-3|EIF3D_HUMAN Isoform 3 of Eukaryotic translation initiation factor 3 subunit D OS=Homo sapiens OX=9606 GN=EIF3D;sp|O15371|
23.1856	22.5878	22.3811	22.26	23.6157	23.5889	22.3278	23.0144	22.8186	23.6788	23.4551	23.6639	23.1181	22.7792	23.9406	24.9005	23.2633	NaN	22.9997	23.2782	22.4643	23.0098	22.8188	22.3869				4	4	4	24.1	24.1	24.1	39.93	0	13.269	172240000	36	sp|O15372|EIF3H_HUMAN	sp|O15372|EIF3H_HUMAN	sp|O15372|EIF3H_HUMAN Eukaryotic translation initiation factor 3 subunit H OS=Homo sapiens OX=9606 GN=EIF3H PE=1 SV=1
25.9655	25.2207	24.3601	25.6965	25.6733	25.5055	25.3695	26.3231	25.8972	25.4821	25.8899	26.0199	25.4282	26.0149	25.3896	25.9633	25.7708	26.2649	25.472	25.6337	25.9352	25.5943	25.6229	25.738				7	7	7	12.7	12.7	12.7	93.045	0	73.911	1446300000	125	sp|O15394|NCAM2_HUMAN;sp|O15394-2|NCAM2_HUMAN	sp|O15394|NCAM2_HUMAN	sp|O15394|NCAM2_HUMAN Neural cell adhesion molecule 2 OS=Homo sapiens OX=9606 GN=NCAM2 PE=1 SV=2
24.4047	24.7803	24.45	24.8199	24.1616	24.3619	24.7467	24.582	24.1269	25.8285	24.3899	25.3816	24.5722	25.2276	23.642	24.1899	25.1706	24.3916	24.0308	24.0474	23.458	25.0679	24.719	24.3776				3	3	3	22.6	22.6	22.6	27.4	0	18.754	613280000	54	sp|O15400-2|STX7_HUMAN;sp|O15400|STX7_HUMAN	sp|O15400-2|STX7_HUMAN;sp|O15400|STX7_HUMAN	sp|O15400-2|STX7_HUMAN Isoform 2 of Syntaxin-7 OS=Homo sapiens OX=9606 GN=STX7;sp|O15400|STX7_HUMAN Syntaxin-7 OS=Homo sapiens OX=9606 GN=STX7 PE=1 SV=4
23.3381	24.0018	23.1347	23.0469	22.8415	23.774	23.7173	23.2804	22.7331	22.198	23.1437	23.1891	21.2451	23.5107	NaN	23.928	24.6185	23.0285	22.6651	22.8007	23.6102	23.1945	23.1589	23.1397				4	4	4	47.2	47.2	47.2	16.311	0	85.196	208070000	43	sp|O15514|RPB4_HUMAN	sp|O15514|RPB4_HUMAN	sp|O15514|RPB4_HUMAN DNA-directed RNA polymerase II subunit RPB4 OS=Homo sapiens OX=9606 GN=POLR2D PE=1 SV=1
29.1595	29.4205	27.1581	29.2738	29.143	29.5374	28.7852	29.6964	29.6136	29.2141	29.1981	29.5881	29.178	29.3746	29.3936	29.6617	29.4707	29.9589	29.6619	29.8948	28.5177	29.4896	30.0545	29.7953				5	5	5	26.3	26.3	26.3	25.592	0	323.31	17205000000	163	sp|O15537|XLRS1_HUMAN	sp|O15537|XLRS1_HUMAN	sp|O15537|XLRS1_HUMAN Retinoschisin OS=Homo sapiens OX=9606 GN=RS1 PE=1 SV=2
24.1477	24.7366	24.7474	25.4413	25.1013	25.0101	24.7858	24.1881	24.6975	25.0241	25.1854	25.822	25.2358	23.7512	25.8036	24.6336	25.6857	24.2219	22.9972	25.4279	23.8948	24.4101	24.5443	23.4648				2	2	2	17.4	17.4	17.4	14.889	0	6.6874	824990000	66	sp|O15540|FABP7_HUMAN;sp|O15540-2|FABP7_HUMAN	sp|O15540|FABP7_HUMAN;sp|O15540-2|FABP7_HUMAN	sp|O15540|FABP7_HUMAN Fatty acid-binding protein, brain OS=Homo sapiens OX=9606 GN=FABP7 PE=1 SV=3;sp|O15540-2|FABP7_HUMAN Isoform 2 of Fatty acid-binding protein, brain OS=Homo sapiens OX=9606 GN=FABP7
29.5808	30.3379	28.866	29.8061	30.6165	30.6984	28.8049	31.209	30.6446	31.1389	29.4777	29.9144	29.9969	30.3245	30.2538	30.8301	31.8304	31.5381	29.5869	30.689	28.162	30.095	30.0761	29.8531				3	3	3	17	17	17	39.026	0	323.31	79880000000	569	sp|O18766|OPSD_PIG;sp|P08100|OPSD_HUMAN	sp|O18766|OPSD_PIG	sp|O18766|OPSD_PIG Rhodopsin OS=Sus scrofa OX=9823 GN=RHO PE=1 SV=1
24.1809	24.6743	23.5167	25.3271	25.7991	25.3524	23.2066	24.295	25.564	24.8762	24.2739	25.6181	24.7853	23.7691	24.67	25.0309	24.7146	25.184	24.9223	26.4341	25.1065	24.2088	24.0362	24.6622				7	7	2	18.5	18.5	6.6	96.117	0	68.169	739760000	92	sp|O18868|KCNB1_PIG	sp|O18868|KCNB1_PIG	sp|O18868|KCNB1_PIG Potassium voltage-gated channel subfamily B member 1 OS=Sus scrofa OX=9823 GN=KCNB1 PE=2 SV=1
29.3465	29.6657	29.8582	29.2187	29.6797	29.4652	28.8622	29.627	30.2224	29.0421	29.2385	29.1873	29.5071	29.96	29.2201	30.3583	29.9424	29.6454	29.5521	30.1627	29.2079	29.4723	29.6704	29.6214				5	5	5	26.9	26.9	26.9	36.116	0	308.15	20797000000	263	sp|O19069|SUCA_PIG;sp|O19069-1|SUCA_PIG;sp|P53597|SUCA_HUMAN	sp|O19069|SUCA_PIG;sp|O19069-1|SUCA_PIG	sp|O19069|SUCA_PIG Succinate--CoA ligase [ADP/GDP-forming] subunit alpha, mitochondrial OS=Sus scrofa OX=9823 GN=SUCLG1 PE=1 SV=2;sp|O19069-1|SUCA_PIG Isoform II of Succinate--CoA ligase [ADP/GDP-forming] subunit alpha, mitochondrial OS=Sus scrofa OX=9823
28.8866	28.996	28.3318	28.6387	28.0281	28.4019	28.7426	28.3767	28.6084	28.2854	28.3637	28.959	28.4015	28.2234	28.5113	28.747	28.3373	28.3554	28.2869	28.2099	28.262	28.3272	28.5263	28.6711				20	20	20	42.3	42.3	42.3	90.932	0	273.55	9240800000	441	sp|O43143|DHX15_HUMAN	sp|O43143|DHX15_HUMAN	sp|O43143|DHX15_HUMAN Pre-mRNA-splicing factor ATP-dependent RNA helicase DHX15 OS=Homo sapiens OX=9606 GN=DHX15 PE=1 SV=2
24.1051	23.8627	23.766	23.0963	24.5896	24.3875	23.0996	23.2869	23.7554	24.5312	24.3435	24.3883	24.4008	24.2434	24.7028	NaN	23.7065	24.0751	24.3258	24.8105	NaN	23.7398	23.9535	24.2735				3	3	3	11.8	11.8	11.8	54.843	0	13.742	398960000	64	sp|O43148|MCES_HUMAN;sp|O43148-2|MCES_HUMAN	sp|O43148|MCES_HUMAN;sp|O43148-2|MCES_HUMAN	sp|O43148|MCES_HUMAN mRNA cap guanine-N7 methyltransferase OS=Homo sapiens OX=9606 GN=RNMT PE=1 SV=1;sp|O43148-2|MCES_HUMAN Isoform 2 of mRNA cap guanine-N7 methyltransferase OS=Homo sapiens OX=9606 GN=RNMT
23.7882	23.9493	23.6082	24.1679	23.2551	23.5574	23.4067	23.5205	23.7346	23.0221	24.0476	23.2898	23.5532	23.7852	24.1846	NaN	23.6183	24.0161	22.8871	23.4561	24.3952	23.6014	23.7468	23.2649				3	3	2	4.3	4.3	3.2	106.98	0	12.844	339770000	19	sp|O43150-2|ASAP2_HUMAN;sp|O43150|ASAP2_HUMAN	sp|O43150-2|ASAP2_HUMAN;sp|O43150|ASAP2_HUMAN	sp|O43150-2|ASAP2_HUMAN Isoform 2 of Arf-GAP with SH3 domain, ANK repeat and PH domain-containing protein 2 OS=Homo sapiens OX=9606 GN=ASAP2;sp|O43150|ASAP2_HUMAN Arf-GAP with SH3 domain, ANK repeat and PH domain-containing protein 2 OS=Homo sapiens OX=960
26.9696	27.7956	NaN	27.5174	25.4419	27.6828	27.8622	27.0446	29.5724	26.8365	NaN	24.7905	27.0675	27.2877	27.7674	28.7846	24.9027	27.0943	27.2515	NaN	NaN	26.8535	25.5185	27.4653				2	2	2	14.9	14.9	14.9	20.108	0.00033852	4.0577	5015100000	31	sp|O43181|NDUS4_HUMAN	sp|O43181|NDUS4_HUMAN	sp|O43181|NDUS4_HUMAN NADH dehydrogenase [ubiquinone] iron-sulfur protein 4, mitochondrial OS=Homo sapiens OX=9606 GN=NDUFS4 PE=1 SV=1
25.8191	24.8334	25.6709	26.5149	26.8241	26.1755	25.5798	25.514	26.8027	26.8235	26.5714	25.6918	26.902	26.4312	25.311	20.4128	NaN	25.7372	25.8595	26.5812	25.0372	25.7959	25.6123	26.2493				3	3	3	21.5	21.5	21.5	38.542	0	21.567	1896700000	52	sp|O43236-5|SEPT4_HUMAN;sp|O43236-2|SEPT4_HUMAN;sp|O43236-3|SEPT4_HUMAN;sp|O43236|SEPT4_HUMAN;sp|O43236-4|SEPT4_HUMAN;sp|O43236-6|SEPT4_HUMAN	sp|O43236-5|SEPT4_HUMAN;sp|O43236-2|SEPT4_HUMAN;sp|O43236-3|SEPT4_HUMAN;sp|O43236|SEPT4_HUMAN;sp|O43236-4|SEPT4_HUMAN	sp|O43236-5|SEPT4_HUMAN Isoform 5 of Septin-4 OS=Homo sapiens OX=9606 GN=SEPT4;sp|O43236-2|SEPT4_HUMAN Isoform 2 of Septin-4 OS=Homo sapiens OX=9606 GN=SEPT4;sp|O43236-3|SEPT4_HUMAN Isoform 3 of Septin-4 OS=Homo sapiens OX=9606 GN=SEPT4;sp|O43236|SEPT4_HUM
26.3383	26.4363	26.4619	26.7243	26.9091	26.1776	26.6199	26.4206	26.5048	26.4866	26.7556	26.4486	26.5769	25.981	25.9744	25.4869	25.2509	24.244	27.322	25.5871	26.5684	25.2922	26.1183	26.3962				8	8	7	33.9	33.9	31.3	54.099	0	99.298	1812100000	99	sp|O43237|DC1L2_HUMAN;sp|O43237-2|DC1L2_HUMAN	sp|O43237|DC1L2_HUMAN;sp|O43237-2|DC1L2_HUMAN	sp|O43237|DC1L2_HUMAN Cytoplasmic dynein 1 light intermediate chain 2 OS=Homo sapiens OX=9606 GN=DYNC1LI2 PE=1 SV=1;sp|O43237-2|DC1L2_HUMAN Isoform 2 of Cytoplasmic dynein 1 light intermediate chain 2 OS=Homo sapiens OX=9606 GN=DYNC1LI2
27.8787	26.9714	27.2461	27.2693	27.1529	27.2699	27.7101	27.3716	27.0539	27.0171	27.0256	26.8288	27.0762	26.9607	27.264	27.3092	27.5311	26.5263	27.3033	27.0776	27.6371	27.3733	27.9087	27.4448				9	9	9	23.4	23.4	23.4	60.977	0	139.21	4542400000	161	sp|O43242|PSMD3_HUMAN;sp|O43242-2|PSMD3_HUMAN	sp|O43242|PSMD3_HUMAN;sp|O43242-2|PSMD3_HUMAN	sp|O43242|PSMD3_HUMAN 26S proteasome non-ATPase regulatory subunit 3 OS=Homo sapiens OX=9606 GN=PSMD3 PE=1 SV=2;sp|O43242-2|PSMD3_HUMAN Isoform 2 of 26S proteasome non-ATPase regulatory subunit 3 OS=Homo sapiens OX=9606 GN=PSMD3
25.4841	25.3245	25.1871	24.9781	24.4628	25.294	25.2434	24.8088	24.1861	24.8144	24.5285	25.4357	24.7538	24.692	24.4857	23.5548	23.6574	24.2218	24.1008	23.318	24.8692	24.4681	24.8081	24.505				7	7	6	22	22	19.7	70.832	0	30.821	700320000	57	sp|O43252|PAPS1_HUMAN	sp|O43252|PAPS1_HUMAN	sp|O43252|PAPS1_HUMAN Bifunctional 3-phosphoadenosine 5-phosphosulfate synthase 1 OS=Homo sapiens OX=9606 GN=PAPSS1 PE=1 SV=2
23.9484	23.8795	24.7556	23.9611	23.7135	24.2547	23.9421	24.0357	23.7799	25.1929	24.3503	21.897	23.8375	24.5106	24.062	23.4952	23.9981	23.7203	23.7632	23.8093	24.9045	23.9231	23.4767	23.6241				5	5	5	9.6	9.6	9.6	88.828	0	81.526	454110000	105	sp|O43264|ZW10_HUMAN;sp|O43264-2|ZW10_HUMAN	sp|O43264|ZW10_HUMAN;sp|O43264-2|ZW10_HUMAN	sp|O43264|ZW10_HUMAN Centromere/kinetochore protein zw10 homolog OS=Homo sapiens OX=9606 GN=ZW10 PE=1 SV=3;sp|O43264-2|ZW10_HUMAN Isoform 2 of Centromere/kinetochore protein zw10 homolog OS=Homo sapiens OX=9606 GN=ZW10
23.512	23.9589	23.0183	22.6973	23.4958	23.5559	23.3331	23.228	NaN	23.4957	23.6561	23.7906	24.1495	23.5585	23.2547	NaN	23.4125	23.3158	23.2966	25.184	22.9679	23.8539	23.5838	22.5526				8	8	8	12.9	12.9	12.9	121.78	0	46.599	232990000	45	sp|O43295-2|SRGP3_HUMAN;sp|O43295|SRGP3_HUMAN;sp|O43295-3|SRGP3_HUMAN	sp|O43295-2|SRGP3_HUMAN;sp|O43295|SRGP3_HUMAN;sp|O43295-3|SRGP3_HUMAN	sp|O43295-2|SRGP3_HUMAN Isoform 2 of SLIT-ROBO Rho GTPase-activating protein 3 OS=Homo sapiens OX=9606 GN=SRGAP3;sp|O43295|SRGP3_HUMAN SLIT-ROBO Rho GTPase-activating protein 3 OS=Homo sapiens OX=9606 GN=SRGAP3 PE=1 SV=3;sp|O43295-3|SRGP3_HUMAN Isoform 3 o
27.7947	28.6822	27.832	28.0882	28.2743	28.5142	27.9948	28.6889	28.5237	29.0392	27.6385	28.6866	28.4447	28.8376	28.4021	29.3235	29.0454	28.9667	28.3527	29.1456	28.3436	28.4266	28.3082	28.6225				18	18	17	39.6	39.6	37.8	74.977	0	323.31	9958800000	365	sp|O43301|HS12A_HUMAN	sp|O43301|HS12A_HUMAN	sp|O43301|HS12A_HUMAN Heat shock 70 kDa protein 12A OS=Homo sapiens OX=9606 GN=HSPA12A PE=1 SV=2
27.8592	26.8441	27.3635	27.4528	27.3096	27.3268	27.1642	27.8817	27.9137	27.4605	26.7502	27.4597	27.6567	27.2849	27.5981	27.4305	27.6596	27.4155	27.6784	26.9535	27.4464	27.1252	27.6258	27.3341				9	9	9	42.5	42.5	42.5	39.124	0	303.4	4965800000	312	sp|O43347|MSI1H_HUMAN	sp|O43347|MSI1H_HUMAN	sp|O43347|MSI1H_HUMAN RNA-binding protein Musashi homolog 1 OS=Homo sapiens OX=9606 GN=MSI1 PE=1 SV=1
27.6024	26.7892	27.0131	26.5231	27.3553	27.078	26.8716	26.9852	26.9365	27.5342	27.2578	25.9071	26.7621	26.5819	25.7898	NaN	24.3272	27.1202	27.6572	26.4495	27.7409	27.2466	27.54	27.1288				7	7	7	45.3	45.3	45.3	32.251	0	51.428	3169300000	80	sp|O43396|TXNL1_HUMAN	sp|O43396|TXNL1_HUMAN	sp|O43396|TXNL1_HUMAN Thioredoxin-like protein 1 OS=Homo sapiens OX=9606 GN=TXNL1 PE=1 SV=3
26.6978	27.1162	26.7774	26.6551	26.7561	26.6102	26.6566	26.6524	27.0145	26.5069	26.5289	26.4656	26.8868	27.4222	26.6894	27.4148	26.5529	27.3474	27.1485	27.3714	27.253	26.9652	26.9779	26.9092				14	14	14	14.9	14.9	14.9	173.1	0	153.02	2792700000	182	sp|O43426|SYNJ1_HUMAN;sp|O43426-4|SYNJ1_HUMAN;sp|O43426-2|SYNJ1_HUMAN;sp|O43426-5|SYNJ1_HUMAN	sp|O43426|SYNJ1_HUMAN;sp|O43426-4|SYNJ1_HUMAN;sp|O43426-2|SYNJ1_HUMAN;sp|O43426-5|SYNJ1_HUMAN	sp|O43426|SYNJ1_HUMAN Synaptojanin-1 OS=Homo sapiens OX=9606 GN=SYNJ1 PE=1 SV=2;sp|O43426-4|SYNJ1_HUMAN Isoform 3 of Synaptojanin-1 OS=Homo sapiens OX=9606 GN=SYNJ1;sp|O43426-2|SYNJ1_HUMAN Isoform 2 of Synaptojanin-1 OS=Homo sapiens OX=9606 GN=SYNJ1;sp|O43
24.5313	24.8332	24.2634	24.0192	24.8609	24.5463	24.777	24.6325	23.9594	24.752	24.5121	24.6914	25.113	24.3677	24.446	NaN	24.8328	24.4113	23.77	23.4122	24.3731	24.579	24.0491	24.3678				9	9	9	10.4	10.4	10.4	146.87	0	23.471	558280000	101	sp|O43432-4|IF4G3_HUMAN;sp|O43432|IF4G3_HUMAN;sp|O43432-3|IF4G3_HUMAN	sp|O43432-4|IF4G3_HUMAN;sp|O43432|IF4G3_HUMAN;sp|O43432-3|IF4G3_HUMAN	sp|O43432-4|IF4G3_HUMAN Isoform 4 of Eukaryotic translation initiation factor 4 gamma 3 OS=Homo sapiens OX=9606 GN=EIF4G3;sp|O43432|IF4G3_HUMAN Eukaryotic translation initiation factor 4 gamma 3 OS=Homo sapiens OX=9606 GN=EIF4G3 PE=1 SV=2;sp|O43432-3|IF4G3
25.2892	25.0149	24.6135	24.2075	25.4123	25.6443	24.3869	24.6181	23.6807	24.443	24.7569	25.2204	25.1244	25.0487	25.3411	25.7478	NaN	24.6246	25.4548	24.1033	24.6242	24.7542	25.5105	25.085				3	3	3	32.2	32.2	32.2	19.208	0	69.734	977950000	36	sp|O43447|PPIH_HUMAN;sp|O43447-2|PPIH_HUMAN	sp|O43447|PPIH_HUMAN	sp|O43447|PPIH_HUMAN Peptidyl-prolyl cis-trans isomerase H OS=Homo sapiens OX=9606 GN=PPIH PE=1 SV=1
31.2055	30.609	31.1051	31.5115	31.2355	30.9954	31.2251	31.1396	31.9237	31.2497	31.491	30.7909	30.7229	30.843	30.761	31.757	31.3055	31.4309	30.7938	31.1145	31.1308	30.9039	31.4898	31.5952				8	8	8	17.3	17.3	17.3	83.801	0	323.31	55964000000	334	sp|O43491-3|E41L2_HUMAN;sp|O43491-4|E41L2_HUMAN;sp|O43491|E41L2_HUMAN;sp|O43491-2|E41L2_HUMAN	sp|O43491-3|E41L2_HUMAN;sp|O43491-4|E41L2_HUMAN;sp|O43491|E41L2_HUMAN;sp|O43491-2|E41L2_HUMAN	sp|O43491-3|E41L2_HUMAN Isoform 3 of Band 4.1-like protein 2 OS=Homo sapiens OX=9606 GN=EPB41L2;sp|O43491-4|E41L2_HUMAN Isoform 4 of Band 4.1-like protein 2 OS=Homo sapiens OX=9606 GN=EPB41L2;sp|O43491|E41L2_HUMAN Band 4.1-like protein 2 OS=Homo sapiens OX
26.6957	26.1671	27.715	25.9817	26.5053	25.7672	26.1211	26.2336	26.9053	25.5744	25.9629	26.1375	25.5207	25.7987	26.2684	26.1559	26.0507	25.5466	26.3147	26.0639	26.1565	26.6419	26.6818	26.9418				4	4	4	85.7	85.7	85.7	9.6138	0	152.06	2185100000	99	sp|Q66X52|LTOR5_PIG;sp|O43504|LTOR5_HUMAN	sp|Q66X52|LTOR5_PIG;sp|O43504|LTOR5_HUMAN	sp|Q66X52|LTOR5_PIG Ragulator complex protein LAMTOR5 OS=Sus scrofa OX=9823 GN=LAMTOR5 PE=3 SV=2;sp|O43504|LTOR5_HUMAN Ragulator complex protein LAMTOR5 OS=Homo sapiens OX=9606 GN=LAMTOR5 PE=1 SV=1
23.6113	23.4794	24.077	23.1953	24.111	23.7479	23.8263	23.6564	23.5006	23.3535	24.1575	24.0683	22.0306	23.5776	24.0532	NaN	22.9808	23.0658	23.7977	23.9142	24.3307	23.935	23.7617	23.8464				8	8	8	15.1	15.1	15.1	109.96	0	24.162	321420000	87	sp|O43592|XPOT_HUMAN	sp|O43592|XPOT_HUMAN	sp|O43592|XPOT_HUMAN Exportin-T OS=Homo sapiens OX=9606 GN=XPOT PE=1 SV=2
26.2444	26.6382	24.3469	25.381	25.6082	25.5324	26.0193	25.0794	25.0481	25.2	24.145	25.9559	25.2256	25.491	26.0324	25.9663	26.2486	25.4259	24.9007	26.0959	24.992	25.8138	25.891	25.8993				3	3	3	22.2	22.2	22.2	20.274	0	100.48	1794600000	123	sp|O43617|TPPC3_HUMAN;sp|O43617-2|TPPC3_HUMAN	sp|O43617|TPPC3_HUMAN;sp|O43617-2|TPPC3_HUMAN	sp|O43617|TPPC3_HUMAN Trafficking protein particle complex subunit 3 OS=Homo sapiens OX=9606 GN=TRAPPC3 PE=1 SV=1;sp|O43617-2|TPPC3_HUMAN Isoform 2 of Trafficking protein particle complex subunit 3 OS=Homo sapiens OX=9606 GN=TRAPPC3
29.1515	29.1112	28.1565	28.2031	28.687	28.5989	28.76	28.2783	28.6165	28.9766	28.6385	28.7001	28.7194	28.3212	29.3719	28.7184	29.2649	28.6427	28.6796	29.2247	28.2889	28.5799	28.4167	28.8323				10	10	10	58.9	58.9	58.9	38.792	0	114.82	11595000000	286	sp|O43681|ASNA_HUMAN	sp|O43681|ASNA_HUMAN	sp|O43681|ASNA_HUMAN ATPase ASNA1 OS=Homo sapiens OX=9606 GN=ASNA1 PE=1 SV=2
27.7223	27.0673	27.8029	27.2357	27.1993	26.6473	27.1468	27.627	28.0683	27.1437	27.1324	27.2937	27.1334	27.2348	26.8042	27.9886	27.093	27.5069	27.3224	27.1452	27.5447	27.2307	27.2499	27.5954				5	5	5	32.8	32.8	32.8	36.954	0	50.462	3946100000	115	sp|O43684-2|BUB3_HUMAN;sp|O43684|BUB3_HUMAN	sp|O43684-2|BUB3_HUMAN;sp|O43684|BUB3_HUMAN	sp|O43684-2|BUB3_HUMAN Isoform 2 of Mitotic checkpoint protein BUB3 OS=Homo sapiens OX=9606 GN=BUB3;sp|O43684|BUB3_HUMAN Mitotic checkpoint protein BUB3 OS=Homo sapiens OX=9606 GN=BUB3 PE=1 SV=1
31.3124	30.6713	31.8942	31.1734	30.8608	30.294	31.258	30.5939	31.3527	30.5369	30.9723	30.6401	30.758	30.2003	30.7976	30.4017	31.1333	30.5479	30.9781	30.8383	31.1658	30.551	30.7379	30.5314				31	31	20	47.4	47.4	33.5	104.85	0	323.31	45965000000	892	sp|O43707|ACTN4_HUMAN;sp|O43707-2|ACTN4_HUMAN;sp|O43707-3|ACTN4_HUMAN	sp|O43707|ACTN4_HUMAN;sp|O43707-2|ACTN4_HUMAN;sp|O43707-3|ACTN4_HUMAN	sp|O43707|ACTN4_HUMAN Alpha-actinin-4 OS=Homo sapiens OX=9606 GN=ACTN4 PE=1 SV=2;sp|O43707-2|ACTN4_HUMAN Isoform ACTN4ISO of Alpha-actinin-4 OS=Homo sapiens OX=9606 GN=ACTN4;sp|O43707-3|ACTN4_HUMAN Isoform 3 of Alpha-actinin-4 OS=Homo sapiens OX=9606 GN=AC
26.8761	27.2448	27.4333	27.242	26.6819	27.6084	26.955	27.2987	27.1395	27.5237	27.1661	27.4163	27.0665	27.0388	27.2151	27.1031	26.4907	27.0186	26.9982	27.1939	26.5982	27.21	27.4248	27.1427				11	11	11	24	24	24	91.35	0	323.31	3712200000	210	sp|O43747|AP1G1_HUMAN;sp|O43747-2|AP1G1_HUMAN	sp|O43747|AP1G1_HUMAN;sp|O43747-2|AP1G1_HUMAN	sp|O43747|AP1G1_HUMAN AP-1 complex subunit gamma-1 OS=Homo sapiens OX=9606 GN=AP1G1 PE=1 SV=5;sp|O43747-2|AP1G1_HUMAN Isoform 2 of AP-1 complex subunit gamma-1 OS=Homo sapiens OX=9606 GN=AP1G1
27.2257	26.5248	26.7949	27.3494	27.385	27.2369	27.0395	26.6146	26.8252	27.4282	27.288	27.1143	26.9158	27.5142	27.4364	27.1357	27.383	27.105	27.7003	27.0199	26.852	26.413	26.6648	26.9417				9	9	9	27.2	27.2	27.2	62.942	0	174.99	3292800000	189	sp|O43776|SYNC_HUMAN;sp|O43776-2|SYNC_HUMAN	sp|O43776|SYNC_HUMAN	sp|O43776|SYNC_HUMAN Asparagine--tRNA ligase, cytoplasmic OS=Homo sapiens OX=9606 GN=NARS PE=1 SV=1
28.1496	27.7809	26.8516	29.3201	27.7271	27.4569	27.0999	27.3514	28.0963	27.7178	24.4251	27.9912	27.9504	27.7767	27.6495	28.1694	27.7018	27.9252	27.2841	27.4413	27.7035	27.6294	27.7539	28.287				7	7	7	41.4	41.4	41.4	26.227	0	89.644	4764000000	109	sp|O43809|CPSF5_HUMAN	sp|O43809|CPSF5_HUMAN	sp|O43809|CPSF5_HUMAN Cleavage and polyadenylation specificity factor subunit 5 OS=Homo sapiens OX=9606 GN=NUDT21 PE=1 SV=1
25.2592	24.5564	23.4568	24.1477	24.8686	23.3957	24.6032	24.3687	21.5921	22.74	24.4392	23.5466	24.43	24.2049	NaN	25.1339	23.6766	23.9326	23.4047	23.513	23.511	23.8653	23.9413	24.6902				5	5	5	12.1	12.1	12.1	86.131	0	43.488	482680000	23	sp|O43815|STRN_HUMAN;sp|O43815-2|STRN_HUMAN	sp|O43815|STRN_HUMAN;sp|O43815-2|STRN_HUMAN	sp|O43815|STRN_HUMAN Striatin OS=Homo sapiens OX=9606 GN=STRN PE=1 SV=4;sp|O43815-2|STRN_HUMAN Isoform 2 of Striatin OS=Homo sapiens OX=9606 GN=STRN
25.1817	24.1849	22.8289	26.1322	25.3541	25.4257	24.4208	24.4065	25.5474	26.0748	24.4104	24.1411	24.6451	24.6506	25.6707	24.4436	25.474	25.6506	25.1533	25.374	NaN	24.7361	24.7106	24.4542				3	3	3	13.8	13.8	13.8	46.36	0	89.622	810030000	69	sp|O43826|G6PT1_HUMAN;sp|O43826-2|G6PT1_HUMAN	sp|O43826|G6PT1_HUMAN;sp|O43826-2|G6PT1_HUMAN	sp|O43826|G6PT1_HUMAN Glucose-6-phosphate exchanger SLC37A4 OS=Homo sapiens OX=9606 GN=SLC37A4 PE=1 SV=1;sp|O43826-2|G6PT1_HUMAN Isoform 2 of Glucose-6-phosphate exchanger SLC37A4 OS=Homo sapiens OX=9606 GN=SLC37A4
28.272	28.3758	27.2862	28.2852	28.7566	28.0356	27.9257	28.1006	28.3251	27.5093	27.3202	27.6005	27.9397	28.1369	27.8753	28.5131	28.2639	28.7296	29.2173	28.4973	27.6044	28.1466	27.9413	28.3138				7	7	6	24.7	24.7	19.7	42.183	0	122.58	8703600000	240	sp|O43837|IDH3B_HUMAN;sp|O43837-2|IDH3B_HUMAN;sp|O43837-3|IDH3B_HUMAN	sp|O43837|IDH3B_HUMAN;sp|O43837-2|IDH3B_HUMAN	sp|O43837|IDH3B_HUMAN Isocitrate dehydrogenase [NAD] subunit beta, mitochondrial OS=Homo sapiens OX=9606 GN=IDH3B PE=1 SV=2;sp|O43837-2|IDH3B_HUMAN Isoform A of Isocitrate dehydrogenase [NAD] subunit beta, mitochondrial OS=Homo sapiens OX=9606 GN=IDH3B
30.0473	28.6127	29.8559	29.4072	29.1363	28.8671	29.7527	28.6154	28.4496	29.1164	29.2341	29.4328	28.5113	27.6509	29.4627	28.7674	29.0332	28.7471	28.7052	28.4726	29.1156	28.4025	28.4595	28.8433				9	9	2	39.7	39.7	9.8	37.106	0	323.31	12736000000	248	sp|O43852|CALU_HUMAN;sp|O43852-3|CALU_HUMAN;sp|O43852-6|CALU_HUMAN;sp|O43852-5|CALU_HUMAN;sp|O43852-9|CALU_HUMAN;sp|O43852-15|CALU_HUMAN;sp|O43852-10|CALU_HUMAN;sp|O43852-13|CALU_HUMAN;sp|O43852-14|CALU_HUMAN;sp|O43852-11|CALU_HUMAN;sp|O43852-12|CALU_HUMAN	sp|O43852|CALU_HUMAN;sp|O43852-3|CALU_HUMAN;sp|O43852-6|CALU_HUMAN;sp|O43852-5|CALU_HUMAN;sp|O43852-9|CALU_HUMAN;sp|O43852-15|CALU_HUMAN;sp|O43852-10|CALU_HUMAN	sp|O43852|CALU_HUMAN Calumenin OS=Homo sapiens OX=9606 GN=CALU PE=1 SV=2;sp|O43852-3|CALU_HUMAN Isoform 3 of Calumenin OS=Homo sapiens OX=9606 GN=CALU;sp|O43852-6|CALU_HUMAN Isoform 6 of Calumenin OS=Homo sapiens OX=9606 GN=CALU;sp|O43852-5|CALU_HUMAN Isof
23.5438	22.2516	22.158	22.7931	NaN	22.7673	22.8411	22.7027	22.4097	24.1051	24.2541	23.3944	23.3979	22.46	23.6531	19.6242	22.3259	23.0091	22.8192	22.05	23.8038	23.1056	22.3954	22.1715				9	2	2	38.7	8.9	8.9	37.134	0	21.71	224540000	40	sp|O43852-2|CALU_HUMAN;sp|O43852-4|CALU_HUMAN;sp|O43852-8|CALU_HUMAN;sp|O43852-7|CALU_HUMAN	sp|O43852-2|CALU_HUMAN;sp|O43852-4|CALU_HUMAN;sp|O43852-8|CALU_HUMAN	sp|O43852-2|CALU_HUMAN Isoform 2 of Calumenin OS=Homo sapiens OX=9606 GN=CALU;sp|O43852-4|CALU_HUMAN Isoform 4 of Calumenin OS=Homo sapiens OX=9606 GN=CALU;sp|O43852-8|CALU_HUMAN Isoform 8 of Calumenin OS=Homo sapiens OX=9606 GN=CALU
26.4812	25.8233	26.08	26.4423	26.7859	26.5019	26.0971	26.6133	25.8879	26.3839	26.616	26.3178	26.0086	26.8532	26.1248	26.5912	26.546	26.4372	25.7255	26.1937	25.7541	24.9821	26.1234	26.0588				9	7	7	32.5	27.4	27.4	58.951	0	245.64	1858600000	105	sp|O43865|SAHH2_HUMAN;sp|O43865-2|SAHH2_HUMAN	sp|O43865|SAHH2_HUMAN;sp|O43865-2|SAHH2_HUMAN	sp|O43865|SAHH2_HUMAN S-adenosylhomocysteine hydrolase-like protein 1 OS=Homo sapiens OX=9606 GN=AHCYL1 PE=1 SV=2;sp|O43865-2|SAHH2_HUMAN Isoform 2 of S-adenosylhomocysteine hydrolase-like protein 1 OS=Homo sapiens OX=9606 GN=AHCYL1
27.4065	27.3206	26.1877	27.6323	27.1775	27.2304	27.6502	27.9506	26.3334	26.8886	26.7987	27.1294	27.4533	26.9208	27.2198	28.1316	25.1153	27.195	27.4669	27.1069	26.43	27.702	27.5362	27.5545				2	2	2	20.7	20.7	20.7	17.42	0	36.597	4167700000	74	sp|O43924|PDE6D_HUMAN	sp|O43924|PDE6D_HUMAN	sp|O43924|PDE6D_HUMAN Retinal rod rhodopsin-sensitive cGMP 3,5-cyclic phosphodiesterase subunit delta OS=Homo sapiens OX=9606 GN=PDE6D PE=1 SV=1
27.436	27.8104	26.6435	26.3854	27.5457	27.3762	27.2935	27.4105	27.2645	27.0321	26.9785	27.363	27.4924	27.1585	27.4021	28.8008	27.3792	27.9183	27.1758	27.1133	26.8038	27.5382	27.1206	27.4526				12	12	11	59.3	59.3	52.5	35.613	0	53.217	4485000000	312	sp|O46560|PDXK_PIG	sp|O46560|PDXK_PIG	sp|O46560|PDXK_PIG Pyridoxal kinase OS=Sus scrofa OX=9823 GN=PDXK PE=1 SV=1
25.9178	25.9098	25.5944	26.5535	26.1847	26.075	25.2435	25.7633	25.6473	25.7392	25.9867	25.5298	26.1951	25.8774	25.8391	NaN	26.1094	26.4236	25.7286	25.8047	24.6762	24.5956	25.3441	25.7739				10	10	10	29.3	29.3	29.3	71.689	0	31.092	1298300000	125	sp|O60216|RAD21_HUMAN;sp|Q9H4I0|RD21L_HUMAN	sp|O60216|RAD21_HUMAN	sp|O60216|RAD21_HUMAN Double-strand-break repair protein rad21 homolog OS=Homo sapiens OX=9606 GN=RAD21 PE=1 SV=2
23.9351	24.063	NaN	23.6762	23.5834	23.722	NaN	23.65	23.7922	22.9582	22.8311	23.2565	23.7375	23.5599	23.7344	24.5315	NaN	24.8194	24.0432	24.7918	23.1685	23.1472	23.2559	23.9517				2	2	2	23.6	23.6	23.6	21.474	0	48.021	239130000	42	sp|O60232|SSA27_HUMAN	sp|O60232|SSA27_HUMAN	sp|O60232|SSA27_HUMAN Sjoegren syndrome/scleroderma autoantigen 1 OS=Homo sapiens OX=9606 GN=SSSCA1 PE=1 SV=1
26.2282	25.9618	24.9371	24.8654	25.4119	25.9139	25.7573	25.3351	25.1476	24.8893	25.1851	25.4672	24.4849	25.1105	24.9649	25.3209	25.2193	25.1587	25.182	24.9966	25.6344	25.7291	25.5315	26.1984				8	8	8	35	35	35	40.925	0	108.63	1158100000	184	sp|O60256|KPRB_HUMAN;sp|O60256-3|KPRB_HUMAN;sp|O60256-2|KPRB_HUMAN;sp|O60256-4|KPRB_HUMAN	sp|O60256|KPRB_HUMAN;sp|O60256-3|KPRB_HUMAN;sp|O60256-2|KPRB_HUMAN;sp|O60256-4|KPRB_HUMAN	sp|O60256|KPRB_HUMAN Phosphoribosyl pyrophosphate synthase-associated protein 2 OS=Homo sapiens OX=9606 GN=PRPSAP2 PE=1 SV=1;sp|O60256-3|KPRB_HUMAN Isoform 3 of Phosphoribosyl pyrophosphate synthase-associated protein 2 OS=Homo sapiens OX=9606 GN=PRPSAP2;s
25.7052	25.0291	25.0226	25.1389	24.6843	25.5852	25.5552	25.3321	25.7169	24.6426	25.4725	24.515	25.2665	24.2679	24.6116	26.5779	24.2567	23.9015	24.6752	23.4221	24.3129	25.3652	25.7624	25.2047				9	9	7	10.7	10.7	9	121.9	0	19.674	903520000	64	sp|O60264|SMCA5_HUMAN	sp|O60264|SMCA5_HUMAN	sp|O60264|SMCA5_HUMAN SWI/SNF-related matrix-associated actin-dependent regulator of chromatin subfamily A member 5 OS=Homo sapiens OX=9606 GN=SMARCA5 PE=1 SV=1
21.3373	24.7126	24.069	23.3668	25.0423	24.103	22.9994	22.6337	23.1409	23.7184	22.7046	23.6256	23.1845	24.102	24.5369	25.2029	NaN	21.8459	24.4717	24.2224	20.1847	23.6563	22.8356	22.8537				5	5	5	8	8	8	128.61	0	123.22	305480000	46	sp|O60271-9|JIP4_HUMAN;sp|O60271-4|JIP4_HUMAN;sp|O60271|JIP4_HUMAN;sp|O60271-5|JIP4_HUMAN;sp|O60271-3|JIP4_HUMAN;sp|O60271-2|JIP4_HUMAN	sp|O60271-9|JIP4_HUMAN;sp|O60271-4|JIP4_HUMAN;sp|O60271|JIP4_HUMAN;sp|O60271-5|JIP4_HUMAN;sp|O60271-3|JIP4_HUMAN;sp|O60271-2|JIP4_HUMAN	sp|O60271-9|JIP4_HUMAN Isoform 6 of C-Jun-amino-terminal kinase-interacting protein 4 OS=Homo sapiens OX=9606 GN=SPAG9;sp|O60271-4|JIP4_HUMAN Isoform 4 of C-Jun-amino-terminal kinase-interacting protein 4 OS=Homo sapiens OX=9606 GN=SPAG9;sp|O60271|JIP4_HUM
25.7045	25.6693	26.0544	24.8714	26.1322	26.4048	25.8062	25.3632	25.7635	25.2283	25.7086	26.1034	25.3219	25.6477	25.8819	25.4942	25.3898	26.8918	25.8138	25.7965	25.8048	26.0499	25.4819	25.344				12	8	8	18.5	12.2	12.2	109.49	0	117.48	1440300000	158	sp|O60282|KIF5C_HUMAN;sp|O60282-2|KIF5C_HUMAN;sp|Q12840|KIF5A_HUMAN	sp|O60282|KIF5C_HUMAN;sp|O60282-2|KIF5C_HUMAN	sp|O60282|KIF5C_HUMAN Kinesin heavy chain isoform 5C OS=Homo sapiens OX=9606 GN=KIF5C PE=1 SV=1;sp|O60282-2|KIF5C_HUMAN Isoform 2 of Kinesin heavy chain isoform 5C OS=Homo sapiens OX=9606 GN=KIF5C
23.4527	23.469	23.8762	23.0789	23.4041	24.2369	22.8057	23.2654	22.6948	23.606	23.261	23.4299	22.5861	24.4351	23.2281	23.1543	23.9658	23.9511	23.0417	23.7706	23.4234	23.2553	24.2055	23.5491				7	7	7	9.8	9.8	9.8	171.29	0	25.208	260100000	35	sp|O60306|AQR_HUMAN	sp|O60306|AQR_HUMAN	sp|O60306|AQR_HUMAN RNA helicase aquarius OS=Homo sapiens OX=9606 GN=AQR PE=1 SV=4
26.4961	26.8569	26.9623	26.6154	26.6074	27.3324	26.7863	26.8663	27.0811	27.2474	26.4874	26.7277	26.8934	26.9294	26.239	27.161	27.8266	26.685	27.1209	26.5671	27.0231	26.8558	26.7132	27.0224				12	12	12	19.6	19.6	19.6	107.57	0	125.34	3120800000	220	sp|O60313-13|OPA1_HUMAN;sp|O60313|OPA1_HUMAN;sp|O60313-9|OPA1_HUMAN;sp|O60313-11|OPA1_HUMAN;sp|O60313-2|OPA1_HUMAN;sp|O60313-10|OPA1_HUMAN	sp|O60313-13|OPA1_HUMAN;sp|O60313|OPA1_HUMAN;sp|O60313-9|OPA1_HUMAN;sp|O60313-11|OPA1_HUMAN;sp|O60313-2|OPA1_HUMAN;sp|O60313-10|OPA1_HUMAN	sp|O60313-13|OPA1_HUMAN Isoform 7 of Dynamin-like 120 kDa protein, mitochondrial OS=Homo sapiens OX=9606 GN=OPA1;sp|O60313|OPA1_HUMAN Dynamin-like 120 kDa protein, mitochondrial OS=Homo sapiens OX=9606 GN=OPA1 PE=1 SV=3;sp|O60313-9|OPA1_HUMAN Isoform 3 of
25.2948	24.6077	24.7244	23.2857	24.8974	24.2961	24.2307	24.4495	25.2144	25.0997	25.0611	25.0531	25.0172	25.4247	24.2838	25.39	24.9132	25.3834	25.0696	24.4849	25.4098	24.4748	24.9087	25.1978				3	3	2	10.9	10.9	8.8	70.213	0	30.936	922720000	70	sp|O60331-4|PI51C_HUMAN;sp|O60331|PI51C_HUMAN;sp|O60331-2|PI51C_HUMAN;sp|O60331-3|PI51C_HUMAN	sp|O60331-4|PI51C_HUMAN;sp|O60331|PI51C_HUMAN;sp|O60331-2|PI51C_HUMAN;sp|O60331-3|PI51C_HUMAN	sp|O60331-4|PI51C_HUMAN Isoform 4 of Phosphatidylinositol 4-phosphate 5-kinase type-1 gamma OS=Homo sapiens OX=9606 GN=PIP5K1C;sp|O60331|PI51C_HUMAN Phosphatidylinositol 4-phosphate 5-kinase type-1 gamma OS=Homo sapiens OX=9606 GN=PIP5K1C PE=1 SV=2;sp|O603
24.893	25.0106	24.3403	24.0618	25.116	23.7507	24.7117	24.3274	24.7852	25.4295	24.3686	25.0685	24.1401	24.389	25.2965	26.3409	25.7565	24.3625	24.0341	25.2206	NaN	24.6359	24.9899	25.1712				9	9	9	22.2	22.2	22.2	92.902	0	39.383	703410000	77	sp|O60341|KDM1A_HUMAN;sp|O60341-2|KDM1A_HUMAN	sp|O60341|KDM1A_HUMAN;sp|O60341-2|KDM1A_HUMAN	sp|O60341|KDM1A_HUMAN Lysine-specific histone demethylase 1A OS=Homo sapiens OX=9606 GN=KDM1A PE=1 SV=2;sp|O60341-2|KDM1A_HUMAN Isoform 2 of Lysine-specific histone demethylase 1A OS=Homo sapiens OX=9606 GN=KDM1A
25.8684	25.8227	26.3655	25.5408	26.6947	25.8486	25.6093	26.1469	26.1962	25.0256	25.7943	25.496	24.9589	24.912	25.8098	21.4638	26.6647	NaN	25.556	25.5103	26.0319	26.0203	25.1856	24.9854				5	5	5	47.5	47.5	47.5	18.762	0	29.616	1218000000	88	sp|O60493|SNX3_HUMAN;sp|O60493-2|SNX3_HUMAN;sp|O60493-4|SNX3_HUMAN;sp|O60493-3|SNX3_HUMAN	sp|O60493|SNX3_HUMAN;sp|O60493-2|SNX3_HUMAN;sp|O60493-4|SNX3_HUMAN	sp|O60493|SNX3_HUMAN Sorting nexin-3 OS=Homo sapiens OX=9606 GN=SNX3 PE=1 SV=3;sp|O60493-2|SNX3_HUMAN Isoform 2 of Sorting nexin-3 OS=Homo sapiens OX=9606 GN=SNX3;sp|O60493-4|SNX3_HUMAN Isoform 4 of Sorting nexin-3 OS=Homo sapiens OX=9606 GN=SNX3
26.8287	26.6858	26.9952	24.9923	26.2057	26.7441	26.949	26.6255	26.446	26.3527	26.5225	26.7881	26.2997	25.9882	25.5251	26.5013	26.3656	26.2101	26.1613	25.9478	26.5694	26.0612	26.0412	26.1055				13	13	13	27.7	27.7	27.7	102.91	0	87.449	1909000000	175	sp|O60502|OGA_HUMAN;sp|O60502-4|OGA_HUMAN;sp|O60502-2|OGA_HUMAN;sp|O60502-3|OGA_HUMAN	sp|O60502|OGA_HUMAN;sp|O60502-4|OGA_HUMAN;sp|O60502-2|OGA_HUMAN;sp|O60502-3|OGA_HUMAN	sp|O60502|OGA_HUMAN Protein O-GlcNAcase OS=Homo sapiens OX=9606 GN=MGEA5 PE=1 SV=2;sp|O60502-4|OGA_HUMAN Isoform 4 of Protein O-GlcNAcase OS=Homo sapiens OX=9606 GN=MGEA5;sp|O60502-2|OGA_HUMAN Isoform 2 of Protein O-GlcNAcase OS=Homo sapiens OX=9606 GN=MGE
28.1228	27.9105	27.649	27.7684	28.2925	28.464	27.6446	27.9637	28.3013	28.2388	28.3089	28.2134	28.1628	28.7138	27.6389	27.9085	28.6408	28.3362	27.9965	28.6922	27.7764	28.3315	28.1157	27.6841				7	7	6	9.8	9.8	8.4	89.655	0	323.31	6620700000	231	sp|O60641-4|AP180_HUMAN;sp|O60641|AP180_HUMAN;sp|O60641-3|AP180_HUMAN	sp|O60641-4|AP180_HUMAN;sp|O60641|AP180_HUMAN;sp|O60641-3|AP180_HUMAN	sp|O60641-4|AP180_HUMAN Isoform 4 of Clathrin coat assembly protein AP180 OS=Homo sapiens OX=9606 GN=SNAP91;sp|O60641|AP180_HUMAN Clathrin coat assembly protein AP180 OS=Homo sapiens OX=9606 GN=SNAP91 PE=1 SV=2;sp|O60641-3|AP180_HUMAN Isoform 3 of Clathrin
26.7105	26.4971	26.7027	26.1762	26.631	26.6188	26.2624	26.0695	26.4328	26.664	26.3939	26.8563	26.3421	26.8064	26.7941	26.0787	26.7336	26.7933	26.2889	26.7133	26.4102	26.5778	26.5252	26.6941				9	9	4	35.1	35.1	20.3	60.029	0	323.31	2020600000	203	sp|O60684|IMA7_HUMAN	sp|O60684|IMA7_HUMAN	sp|O60684|IMA7_HUMAN Importin subunit alpha-7 OS=Homo sapiens OX=9606 GN=KPNA6 PE=1 SV=1
26.4581	26.0317	26.5884	26.0992	26.1877	26.2696	26.5822	26.2512	26.2677	26.7383	26.1947	26.0392	26.3174	26.4501	26.8491	26.0394	25.9079	23.9672	24.8036	25.9463	26.2722	25.7746	26.3811	25.896				12	12	12	22.9	22.9	22.9	90.283	0	157.12	1924400000	165	sp|O60716-24|CTND1_HUMAN;sp|O60716-23|CTND1_HUMAN;sp|O60716-21|CTND1_HUMAN;sp|O60716-19|CTND1_HUMAN;sp|O60716-22|CTND1_HUMAN;sp|O60716-20|CTND1_HUMAN;sp|O60716-16|CTND1_HUMAN;sp|O60716-18|CTND1_HUMAN;sp|O60716-15|CTND1_HUMAN;sp|O60716-17|CTND1_HUMAN;sp|O60716-13|CTND1_HUMAN;sp|O60716-11|CTND1_HUMAN;sp|O60716-14|CTND1_HUMAN;sp|O60716-12|CTND1_HUMAN;sp|O60716-10|CTND1_HUMAN;sp|O60716-8|CTND1_HUMAN;…	sp|O60716-24|CTND1_HUMAN;sp|O60716-23|CTND1_HUMAN;sp|O60716-21|CTND1_HUMAN;sp|O60716-19|CTND1_HUMAN;sp|O60716-22|CTND1_HUMAN;sp|O60716-20|CTND1_HUMAN;sp|O60716-16|CTND1_HUMAN;sp|O60716-18|CTND1_HUMAN;sp|O60716-15|CTND1_HUMAN;sp|O60716-17|CTND1_HUMAN;sp|O60716-13|CTND1_HUMAN;sp|O60716-11|CTND1_HUMAN;sp|O60716-14|CTND1_HUMAN;sp|O60716-12|CTND1_HUMAN;sp|O60716-10|CTND1_HUMAN;sp|O60716-8|CTND1_HUMAN;…	sp|O60716-24|CTND1_HUMAN Isoform 3 of Catenin delta-1 OS=Homo sapiens OX=9606 GN=CTNND1;sp|O60716-23|CTND1_HUMAN Isoform 3C of Catenin delta-1 OS=Homo sapiens OX=9606 GN=CTNND1;sp|O60716-21|CTND1_HUMAN Isoform 3A of Catenin delta-1 OS=Homo sapiens OX=9606
27.035	27.4439	26.939	26.3573	27.547	27.87	26.9139	27.0233	26.9527	27.1993	27.4028	26.6647	27.4863	27.7476	27.2411	28.357	27.6802	27.0134	27.3894	27.8762	27.0942	27.0006	27.1497	27.1994				6	6	3	74.3	74.3	40.7	12.823	0	288.71	3597500000	126	sp|P61220|EIF1B_PIG;sp|O60739|EIF1B_HUMAN	sp|P61220|EIF1B_PIG;sp|O60739|EIF1B_HUMAN	sp|P61220|EIF1B_PIG Eukaryotic translation initiation factor 1b OS=Sus scrofa OX=9823 GN=EIF1B PE=3 SV=1;sp|O60739|EIF1B_HUMAN Eukaryotic translation initiation factor 1b OS=Homo sapiens OX=9606 GN=EIF1B PE=1 SV=2
25.6895	26.1846	25.5383	26.4384	26.5752	25.8283	25.6139	26.1089	25.7261	25.9766	26.9098	26.687	26.2204	26.2561	26.3173	25.6428	26.5999	27.173	26.7184	26.7441	26.2546	25.9658	25.9356	26.2528				9	9	7	17.3	17.3	13.7	98.795	0	323.31	1642800000	175	sp|O60741|HCN1_HUMAN;sp|Q9Y3Q4|HCN4_HUMAN;sp|Q9P1Z3|HCN3_HUMAN	sp|O60741|HCN1_HUMAN	sp|O60741|HCN1_HUMAN Potassium/sodium hyperpolarization-activated cyclic nucleotide-gated channel 1 OS=Homo sapiens OX=9606 GN=HCN1 PE=1 SV=3
26.0794	25.84	25.4805	25.3414	25.3133	25.5391	26.0297	26.0548	26.7791	25.0884	25.8657	25.8424	26.0374	25.441	26.9308	25.7724	26.545	25.9706	26.0049	25.9043	NaN	24.959	25.4848	25.6857				6	5	5	21.6	19.2	19.2	46.097	0	104.64	1449900000	64	sp|O60749-2|SNX2_HUMAN;sp|O60749|SNX2_HUMAN	sp|O60749-2|SNX2_HUMAN;sp|O60749|SNX2_HUMAN	sp|O60749-2|SNX2_HUMAN Isoform 2 of Sorting nexin-2 OS=Homo sapiens OX=9606 GN=SNX2;sp|O60749|SNX2_HUMAN Sorting nexin-2 OS=Homo sapiens OX=9606 GN=SNX2 PE=1 SV=2
25.1823	24.8611	24.8802	25.8086	25.4229	25.4449	25.1636	24.5938	24.0389	25.282	24.7295	25.962	22.9193	25.0325	24.5548	24.0088	26.002	25.1959	25.5684	25.431	25.6808	25.0678	24.4535	25.0029				5	5	5	27.7	27.7	27.7	29.634	0	16.394	796560000	70	sp|O60762|DPM1_HUMAN;sp|A5GFZ5|DPM1_PIG	sp|O60762|DPM1_HUMAN;sp|A5GFZ5|DPM1_PIG	sp|O60762|DPM1_HUMAN Dolichol-phosphate mannosyltransferase subunit 1 OS=Homo sapiens OX=9606 GN=DPM1 PE=1 SV=1;sp|A5GFZ5|DPM1_PIG Dolichol-phosphate mannosyltransferase subunit 1 OS=Sus scrofa OX=9823 GN=DPM1 PE=3 SV=1
27.3618	27.1053	27.0181	26.7062	26.9453	26.6613	26.964	26.4074	27.2757	26.1314	25.9182	27.3336	26.7828	26.5544	26.962	26.8311	26.062	27.0664	27.0006	26.8415	26.8263	26.9466	26.9565	27.0552				13	13	13	21.2	21.2	21.2	107.89	0	175.57	3123100000	155	sp|O60763|USO1_HUMAN;sp|O60763-2|USO1_HUMAN	sp|O60763|USO1_HUMAN;sp|O60763-2|USO1_HUMAN	sp|O60763|USO1_HUMAN General vesicular transport factor p115 OS=Homo sapiens OX=9606 GN=USO1 PE=1 SV=2;sp|O60763-2|USO1_HUMAN Isoform 2 of General vesicular transport factor p115 OS=Homo sapiens OX=9606 GN=USO1
25.8085	25.8548	26.364	26.1023	25.8814	25.7499	26.0678	25.9087	25.5745	25.4467	26.6337	26.0779	25.3803	25.7884	26.4224	25.7514	25.7924	25.5992	25.0558	25.1756	25.246	25.5227	25.9891	25.9297				5	5	5	17.7	17.7	17.7	53.818	0	184.44	1482200000	170	sp|O60784|TOM1_HUMAN;sp|O60784-2|TOM1_HUMAN;sp|O60784-3|TOM1_HUMAN;sp|O60784-4|TOM1_HUMAN	sp|O60784|TOM1_HUMAN;sp|O60784-2|TOM1_HUMAN;sp|O60784-3|TOM1_HUMAN;sp|O60784-4|TOM1_HUMAN	sp|O60784|TOM1_HUMAN Target of Myb protein 1 OS=Homo sapiens OX=9606 GN=TOM1 PE=1 SV=2;sp|O60784-2|TOM1_HUMAN Isoform 2 of Target of Myb protein 1 OS=Homo sapiens OX=9606 GN=TOM1;sp|O60784-3|TOM1_HUMAN Isoform 3 of Target of Myb protein 1 OS=Homo sapiens O
25.8889	26.6232	26.5518	26.0488	24.7527	26.8623	26.3945	26.5178	26.6772	27.0005	26.2147	25.7974	26.1426	26.9842	25.92	26.1308	24.842	24.6665	24.831	24.7984	26.1628	26.3856	26.7922	25.9453				2	2	2	16.3	16.3	16.3	19.258	0	247.04	2276900000	144	sp|O60831|PRAF2_HUMAN	sp|O60831|PRAF2_HUMAN	sp|O60831|PRAF2_HUMAN PRA1 family protein 2 OS=Homo sapiens OX=9606 GN=PRAF2 PE=1 SV=1
25.4538	21.5732	25.8051	21.8236	25.3572	25.3859	25.3275	26.4058	24.984	24.7706	24.4041	25.2061	24.9242	25.0926	24.4301	23.7501	19.095	24.9597	24.5247	NaN	24.9153	25.2713	24.3018	23.9766				3	3	3	15.7	15.7	15.7	47.602	0	5.6229	1119300000	53	sp|O60832-2|DKC1_HUMAN;sp|O60832|DKC1_HUMAN	sp|O60832-2|DKC1_HUMAN;sp|O60832|DKC1_HUMAN	sp|O60832-2|DKC1_HUMAN Isoform 3 of H/ACA ribonucleoprotein complex subunit 4 OS=Homo sapiens OX=9606 GN=DKC1;sp|O60832|DKC1_HUMAN H/ACA ribonucleoprotein complex subunit 4 OS=Homo sapiens OX=9606 GN=DKC1 PE=1 SV=3
25.8169	25.8012	25.9556	26.6357	25.139	24.2662	24.7841	24.7923	25.9899	NaN	25.3526	26.4584	25.1867	24.8894	24.7751	25.539	25.39	24.1856	25.3367	23.9842	25.1363	24.6155	25.1948	24.5761				7	7	7	10.8	10.8	10.8	138.83	0	31.171	1072800000	57	sp|O60841|IF2P_HUMAN	sp|O60841|IF2P_HUMAN	sp|O60841|IF2P_HUMAN Eukaryotic translation initiation factor 5B OS=Homo sapiens OX=9606 GN=EIF5B PE=1 SV=4
27.0559	27.2774	27.0784	27.3026	27.5113	27.83	27.0022	27.2289	26.5619	27.9339	27.173	27.6725	27.1599	27.4398	26.8675	27.5438	27.4596	27.1748	27.0576	27.1037	26.9164	27.4222	27.6379	27.4023				8	8	8	41	41	41	45.745	0	203.41	3614900000	289	sp|O60884|DNJA2_HUMAN	sp|O60884|DNJA2_HUMAN	sp|O60884|DNJA2_HUMAN DnaJ homolog subfamily A member 2 OS=Homo sapiens OX=9606 GN=DNAJA2 PE=1 SV=1
26.4499	26.4798	26.937	26.0819	26.5904	27.159	26.2448	26.3071	26.8803	26.6937	27.2197	27.6971	26.3131	26.6814	26.7887	26.3349	27.2234	26.5708	26.8067	27.024	26.732	27.2023	26.6155	26.4316				3	3	3	29.5	29.5	29.5	16.832	0	5.6256	2288700000	66	sp|O60888-3|CUTA_HUMAN;sp|O60888|CUTA_HUMAN;sp|O60888-2|CUTA_HUMAN	sp|O60888-3|CUTA_HUMAN;sp|O60888|CUTA_HUMAN;sp|O60888-2|CUTA_HUMAN	sp|O60888-3|CUTA_HUMAN Isoform C of Protein CutA OS=Homo sapiens OX=9606 GN=CUTA;sp|O60888|CUTA_HUMAN Protein CutA OS=Homo sapiens OX=9606 GN=CUTA PE=1 SV=2;sp|O60888-2|CUTA_HUMAN Isoform A of Protein CutA OS=Homo sapiens OX=9606 GN=CUTA
24.8129	25.5651	26.1365	25.0535	25.8519	25.2802	25.0961	24.8937	26.1007	25.2202	25.4046	24.912	24.7371	25.1688	24.9064	24.7197	24.7604	25.3436	25.8018	27.369	25.9783	25.1994	25.5031	25.6586				2	2	2	16.4	16.4	16.4	14.21	0.00035373	4.7859	1223700000	27	sp|O60925|PFD1_HUMAN	sp|O60925|PFD1_HUMAN	sp|O60925|PFD1_HUMAN Prefoldin subunit 1 OS=Homo sapiens OX=9606 GN=PFDN1 PE=1 SV=2
24.6517	22.397	24.9654	24.0311	24.214	25.2156	24.8073	23.3736	25.0307	25.653	24.3272	23.6907	24.5705	25.2646	25.2385	NaN	22.5241	19.7861	23.453	25.144	26.029	24.4168	23.4562	26.3963				7	7	5	23.5	23.5	15.9	59.771	0	10.862	759130000	73	sp|O62839|CATA_PIG	sp|O62839|CATA_PIG	sp|O62839|CATA_PIG Catalase OS=Sus scrofa OX=9823 GN=CAT PE=1 SV=4
25.6973	24.6932	NaN	24.4656	23.9233	23.3661	23.8739	24.0333	24.1353	NaN	23.9598	24.1064	22.8022	23.968	NaN	24.286	23.5013	23.6257	23.6657	NaN	22.399	24.174	24.2748	25.1071				5	5	4	7.6	7.6	6.6	124.3	0	6.9834	482690000	37	sp|O75038-2|PLCH2_HUMAN;sp|O75038-4|PLCH2_HUMAN;sp|O75038-3|PLCH2_HUMAN;sp|O75038|PLCH2_HUMAN;sp|O75038-5|PLCH2_HUMAN;sp|Q4KWH8-3|PLCH1_HUMAN;sp|Q4KWH8-4|PLCH1_HUMAN;sp|Q4KWH8|PLCH1_HUMAN	sp|O75038-2|PLCH2_HUMAN;sp|O75038-4|PLCH2_HUMAN;sp|O75038-3|PLCH2_HUMAN;sp|O75038|PLCH2_HUMAN	sp|O75038-2|PLCH2_HUMAN Isoform 2 of 1-phosphatidylinositol 4,5-bisphosphate phosphodiesterase eta-2 OS=Homo sapiens OX=9606 GN=PLCH2;sp|O75038-4|PLCH2_HUMAN Isoform 4 of 1-phosphatidylinositol 4,5-bisphosphate phosphodiesterase eta-2 OS=Homo sapiens OX=96
22.6844	22.8146	23.551	21.9273	22.2681	23.5715	22.9953	23.1538	23.226	22.9154	23.4495	24.4245	22.7088	22.6345	22.4095	21.0877	22.5024	22.7241	22.8879	22.5078	22.8366	23.0893	22.5555	22.5898				3	3	2	4.9	4.9	3.7	120.87	0	6.8716	155370000	39	sp|O75044|SRGP2_HUMAN;sp|P0DMP2|SRG2B_HUMAN;sp|P0DJJ0|SRG2C_HUMAN;sp|Q7Z6B7-2|SRGP1_HUMAN	sp|O75044|SRGP2_HUMAN;sp|P0DMP2|SRG2B_HUMAN;sp|P0DJJ0|SRG2C_HUMAN	sp|O75044|SRGP2_HUMAN SLIT-ROBO Rho GTPase-activating protein 2 OS=Homo sapiens OX=9606 GN=SRGAP2 PE=1 SV=3;sp|P0DMP2|SRG2B_HUMAN SLIT-ROBO Rho GTPase-activating protein 2B OS=Homo sapiens OX=9606 GN=SRGAP2B PE=3 SV=1;sp|P0DJJ0|SRG2C_HUMAN SLIT-ROBO Rho GT
29.6	28.5209	29.6374	29.5069	29.0429	29.0092	29.4177	29.1471	29.4311	29.1421	29.4694	29.5846	29.2167	29.3553	29.9428	29.8495	29.2908	29.3945	29.5548	28.8136	29.3555	29.3259	29.4243	29.7507				11	11	11	39.3	39.3	39.3	66.193	0	261.03	17343000000	305	sp|O75083|WDR1_HUMAN;sp|O75083-3|WDR1_HUMAN	sp|O75083|WDR1_HUMAN;sp|O75083-3|WDR1_HUMAN	sp|O75083|WDR1_HUMAN WD repeat-containing protein 1 OS=Homo sapiens OX=9606 GN=WDR1 PE=1 SV=4;sp|O75083-3|WDR1_HUMAN Isoform 2 of WD repeat-containing protein 1 OS=Homo sapiens OX=9606 GN=WDR1
25.1935	25.489	24.3998	25.6234	24.662	24.7897	24.8895	26.1746	24.9994	25.5788	25.7051	25.0992	25.8286	26.1528	25.1199	NaN	25.6745	24.8843	26.1584	26.4842	NaN	25.3466	25.2599	26.0402				11	11	2	14.3	14.3	1.8	160.9	0	38.419	1208800000	47	sp|O75116|ROCK2_HUMAN	sp|O75116|ROCK2_HUMAN	sp|O75116|ROCK2_HUMAN Rho-associated protein kinase 2 OS=Homo sapiens OX=9606 GN=ROCK2 PE=1 SV=4
27.0961	27.0344	26.812	26.9031	27.1782	27.1771	26.8575	26.6048	27.1869	27.4053	27.2845	27.0861	26.6553	27.6765	27.3319	27.2033	27.3174	26.9626	26.6761	28.3336	27.0944	26.8222	27.2772	27.0729				20	20	17	23	23	21	165.92	0	312.34	3773000000	265	sp|O75122-3|CLAP2_HUMAN;sp|O75122|CLAP2_HUMAN;sp|O75122-2|CLAP2_HUMAN	sp|O75122-3|CLAP2_HUMAN;sp|O75122|CLAP2_HUMAN	sp|O75122-3|CLAP2_HUMAN Isoform 3 of CLIP-associating protein 2 OS=Homo sapiens OX=9606 GN=CLASP2;sp|O75122|CLAP2_HUMAN CLIP-associating protein 2 OS=Homo sapiens OX=9606 GN=CLASP2 PE=1 SV=2
24.1192	23.2918	23.5967	24.1871	23.9139	24.1884	23.9628	23.6367	23.7515	24.3884	24.2284	23.7786	24.4472	23.955	24.4141	NaN	24.0088	25.1838	24.5242	24.1546	25.1167	22.9212	23.5257	23.0595				6	5	5	16.6	14.9	14.9	60.13	0	25.46	330170000	70	sp|O75131|CPNE3_HUMAN;sp|Q86YQ8-2|CPNE8_HUMAN;sp|Q9HCH3-2|CPNE5_HUMAN;sp|Q8IYJ1|CPNE9_HUMAN;sp|Q9UBL6-2|CPNE7_HUMAN;sp|Q86YQ8|CPNE8_HUMAN;sp|Q9HCH3|CPNE5_HUMAN;sp|Q9UBL6|CPNE7_HUMAN	sp|O75131|CPNE3_HUMAN	sp|O75131|CPNE3_HUMAN Copine-3 OS=Homo sapiens OX=9606 GN=CPNE3 PE=1 SV=1
23.9969	24.8445	24.0463	24.226	23.7964	24.8228	24.8	24.0289	23.9532	24.0222	24.2002	24.3095	24.5396	25.1825	24.3739	23.8975	25.2095	24.1302	24.8994	24.0326	24.3326	23.9625	24.1105	24.2566				5	5	5	6.5	6.5	6.5	135.25	0	103.17	511380000	67	sp|O75155|CAND2_HUMAN;sp|O75155-2|CAND2_HUMAN	sp|O75155|CAND2_HUMAN;sp|O75155-2|CAND2_HUMAN	sp|O75155|CAND2_HUMAN Cullin-associated NEDD8-dissociated protein 2 OS=Homo sapiens OX=9606 GN=CAND2 PE=1 SV=3;sp|O75155-2|CAND2_HUMAN Isoform 2 of Cullin-associated NEDD8-dissociated protein 2 OS=Homo sapiens OX=9606 GN=CAND2
24.4739	24.457	24.4913	24.6437	24.5822	24.6535	25.012	24.6907	24.0286	25.1512	24.82	25.0069	24.5075	24.8851	24.8027	23.7634	24.0837	24.0899	24.477	23.8993	24.9215	24.1533	24.3138	24.0161				12	12	12	9.1	9.1	9.1	254.41	0	51.501	549220000	151	sp|O75165|DJC13_HUMAN	sp|O75165|DJC13_HUMAN	sp|O75165|DJC13_HUMAN DnaJ homolog subfamily C member 13 OS=Homo sapiens OX=9606 GN=DNAJC13 PE=1 SV=5
26.647	26.7693	24.3908	25.3796	26.016	25.5791	25.8342	26.9865	26.9805	25.6544	26.2752	27.5486	26.726	26.6213	25.7585	26.2475	25.9998	26.1895	26.3516	25.7486	23.2558	25.8279	25.825	26.4454				2	2	2	11.2	11.2	11.2	22.202	0	188.85	2219200000	73	sp|O75251-2|NDUS7_HUMAN;sp|O75251|NDUS7_HUMAN	sp|O75251-2|NDUS7_HUMAN;sp|O75251|NDUS7_HUMAN	sp|O75251-2|NDUS7_HUMAN Isoform 2 of NADH dehydrogenase [ubiquinone] iron-sulfur protein 7, mitochondrial OS=Homo sapiens OX=9606 GN=NDUFS7;sp|O75251|NDUS7_HUMAN NADH dehydrogenase [ubiquinone] iron-sulfur protein 7, mitochondrial OS=Homo sapiens OX=9606 G
27.0276	27.2737	27.189	26.5544	27.1455	27.7163	26.6588	27.1428	26.846	26.796	25.7795	27.7051	24.4958	27.0859	24.1406	24.9829	27.077	26.9139	26.7407	27.8654	24.1182	26.8789	27.2729	27.1102				8	8	8	24.4	24.4	24.4	52.545	0	131.09	3139800000	136	sp|O75306|NDUS2_HUMAN;sp|O75306-2|NDUS2_HUMAN	sp|O75306|NDUS2_HUMAN;sp|O75306-2|NDUS2_HUMAN	sp|O75306|NDUS2_HUMAN NADH dehydrogenase [ubiquinone] iron-sulfur protein 2, mitochondrial OS=Homo sapiens OX=9606 GN=NDUFS2 PE=1 SV=2;sp|O75306-2|NDUS2_HUMAN Isoform 2 of NADH dehydrogenase [ubiquinone] iron-sulfur protein 2, mitochondrial OS=Homo sapiens
26.2258	25.8928	25.7102	26.4212	25.8856	26.1556	26.3201	26.403	25.4286	26.2361	25.785	25.2666	25.5193	25.0178	25.8608	25.6803	NaN	25.0028	25.2921	25	25.567	25.9942	25.8857	26.2145				4	4	4	22.2	22.2	22.2	21.664	0	35.812	1687700000	67	sp|O75340-2|PDCD6_HUMAN;sp|O75340|PDCD6_HUMAN	sp|O75340-2|PDCD6_HUMAN;sp|O75340|PDCD6_HUMAN	sp|O75340-2|PDCD6_HUMAN Isoform 2 of Programmed cell death protein 6 OS=Homo sapiens OX=9606 GN=PDCD6;sp|O75340|PDCD6_HUMAN Programmed cell death protein 6 OS=Homo sapiens OX=9606 GN=PDCD6 PE=1 SV=1
28.3234	28.4285	25.8835	28.0199	27.8225	24.0669	28.7649	28.583	28.3981	28.2458	27.9872	28.2213	29.2149	28.0882	28.086	28.7119	28.1408	28.3898	27.9793	28.7155	27.5748	28.2065	28.1583	28.4918				4	4	3	42.4	42.4	29.7	13.757	0	195.75	7821900000	140	sp|O75348|VATG1_HUMAN	sp|O75348|VATG1_HUMAN	sp|O75348|VATG1_HUMAN V-type proton ATPase subunit G 1 OS=Homo sapiens OX=9606 GN=ATP6V1G1 PE=1 SV=3
31.3272	31.0884	30.7335	31.4944	31.1503	30.9117	31.1996	30.9557	31.2989	30.7115	30.6257	31.3053	30.9299	30.955	31.2702	31.1466	31.1637	31.2283	31.0878	30.851	31.2455	31.2022	31.464	31.2729				14	14	12	66	66	59	39.488	0	323.31	61405000000	905	sp|O75367-3|H2AY_HUMAN;sp|O75367|H2AY_HUMAN;sp|O75367-2|H2AY_HUMAN	sp|O75367-3|H2AY_HUMAN;sp|O75367|H2AY_HUMAN;sp|O75367-2|H2AY_HUMAN	sp|O75367-3|H2AY_HUMAN Isoform 3 of Core histone macro-H2A.1 OS=Homo sapiens OX=9606 GN=H2AFY;sp|O75367|H2AY_HUMAN Core histone macro-H2A.1 OS=Homo sapiens OX=9606 GN=H2AFY PE=1 SV=4;sp|O75367-2|H2AY_HUMAN Isoform 1 of Core histone macro-H2A.1 OS=Homo sapi
26.6289	25.2636	26.3677	26.3264	26.3156	26.2904	26.7965	26.3959	26.3806	25.9622	26.743	25.8719	26.7533	25.5785	26.2646	24.9646	27.333	25.9152	24.1684	25.9137	26.4312	25.9539	25.9509	25.2861				28	23	23	20.7	18.3	18.3	275.66	0	89.737	1923300000	140	sp|O75369-2|FLNB_HUMAN;sp|O75369-9|FLNB_HUMAN;sp|O75369|FLNB_HUMAN;sp|O75369-6|FLNB_HUMAN;sp|O75369-3|FLNB_HUMAN;sp|O75369-8|FLNB_HUMAN;sp|O75369-5|FLNB_HUMAN;sp|O75369-4|FLNB_HUMAN;sp|O75369-7|FLNB_HUMAN	sp|O75369-2|FLNB_HUMAN;sp|O75369-9|FLNB_HUMAN;sp|O75369|FLNB_HUMAN;sp|O75369-6|FLNB_HUMAN;sp|O75369-3|FLNB_HUMAN;sp|O75369-8|FLNB_HUMAN;sp|O75369-5|FLNB_HUMAN;sp|O75369-4|FLNB_HUMAN;sp|O75369-7|FLNB_HUMAN	sp|O75369-2|FLNB_HUMAN Isoform 2 of Filamin-B OS=Homo sapiens OX=9606 GN=FLNB;sp|O75369-9|FLNB_HUMAN Isoform 9 of Filamin-B OS=Homo sapiens OX=9606 GN=FLNB;sp|O75369|FLNB_HUMAN Filamin-B OS=Homo sapiens OX=9606 GN=FLNB PE=1 SV=2;sp|O75369-6|FLNB_HUMAN Isof
23.7314	24.9908	24.4105	25.0942	23.0865	23.5725	23.6565	25.338	24.8836	24.456	23.8526	24.6911	24.1089	24.8364	24.0996	26.314	22.8975	24.2917	25.1943	NaN	24.2078	25.2172	24.7797	24.5534				4	4	4	22	22	22	26.034	0	9.2089	664930000	50	sp|O75391|SPAG7_HUMAN	sp|O75391|SPAG7_HUMAN	sp|O75391|SPAG7_HUMAN Sperm-associated antigen 7 OS=Homo sapiens OX=9606 GN=SPAG7 PE=1 SV=2
28.7336	28.1786	28.0756	28.2927	27.6225	27.5696	28.5229	28.1752	28.3293	27.3239	27.5527	27.9229	28.0978	27.7445	28.1664	28.1344	29.4577	28.6623	28.3644	28.4008	28.974	28.5978	28.6389	28.2157				4	4	4	24.7	24.7	24.7	24.593	0	323.31	10621000000	237	sp|O75396|SC22B_HUMAN	sp|O75396|SC22B_HUMAN	sp|O75396|SC22B_HUMAN Vesicle-trafficking protein SEC22b OS=Homo sapiens OX=9606 GN=SEC22B PE=1 SV=4
26.94	27.8106	28.7365	27.2159	27.6046	27.8606	26.716	26.2583	27.2673	27.5232	27.7135	27.4766	27.4109	28.5808	27.1941	NaN	27.5424	26.4935	27.7738	27.6355	26.6907	27.1067	26.8921	27.5217				4	4	4	40.3	40.3	40.3	29.763	0	248.52	3569700000	88	sp|O75431|MTX2_HUMAN;sp|Q2L969|MTX2_PIG;sp|O75431-2|MTX2_HUMAN	sp|O75431|MTX2_HUMAN;sp|Q2L969|MTX2_PIG;sp|O75431-2|MTX2_HUMAN	sp|O75431|MTX2_HUMAN Metaxin-2 OS=Homo sapiens OX=9606 GN=MTX2 PE=1 SV=1;sp|Q2L969|MTX2_PIG Metaxin-2 OS=Sus scrofa OX=9823 GN=MTX2 PE=2 SV=1;sp|O75431-2|MTX2_HUMAN Isoform 2 of Metaxin-2 OS=Homo sapiens OX=9606 GN=MTX2
27.1771	27.1105	24.6675	26.991	26.2305	26.1897	27.1925	26.946	27.2945	26.1251	26.5653	24.0862	27.0435	26.0137	26.705	26.349	25.9326	25.7891	27.0666	25.8229	26.4582	26.14	26.5982	27.202				7	7	6	32.1	32.1	30	38.169	0	16.43	2595000000	116	sp|O75436|VP26A_HUMAN;sp|O75436-2|VP26A_HUMAN	sp|O75436|VP26A_HUMAN;sp|O75436-2|VP26A_HUMAN	sp|O75436|VP26A_HUMAN Vacuolar protein sorting-associated protein 26A OS=Homo sapiens OX=9606 GN=VPS26A PE=1 SV=2;sp|O75436-2|VP26A_HUMAN Isoform 2 of Vacuolar protein sorting-associated protein 26A OS=Homo sapiens OX=9606 GN=VPS26A
22.8649	22.931	22.5518	22.7347	23.511	23.4762	22.5653	22.3928	22.479	23.6587	23.3655	23.1953	23.0056	23.4638	23.9133	23.5846	22.9217	23.0289	23.9173	23.4074	23.3019	23.3107	23.0726	22.6266				4	4	4	16.4	16.4	16.4	54.366	0	22.155	172370000	39	sp|O75439|MPPB_HUMAN	sp|O75439|MPPB_HUMAN	sp|O75439|MPPB_HUMAN Mitochondrial-processing peptidase subunit beta OS=Homo sapiens OX=9606 GN=PMPCB PE=1 SV=2
28.7005	28.3881	28.6271	28.0183	28.1853	28.6278	28.6252	28.4902	28.7204	27.9624	28.4876	28.481	28.1568	28.5623	28.7308	28.5399	28.4426	28.389	28.5754	28.111	28.4047	28.7093	28.1383	28.2228				6	6	6	13.2	13.2	13.2	60.103	0	264.01	11006000000	204	sp|O75475|PSIP1_HUMAN;sp|O75475-3|PSIP1_HUMAN;sp|O75475-2|PSIP1_HUMAN	sp|O75475|PSIP1_HUMAN;sp|O75475-3|PSIP1_HUMAN;sp|O75475-2|PSIP1_HUMAN	sp|O75475|PSIP1_HUMAN PC4 and SFRS1-interacting protein OS=Homo sapiens OX=9606 GN=PSIP1 PE=1 SV=1;sp|O75475-3|PSIP1_HUMAN Isoform 3 of PC4 and SFRS1-interacting protein OS=Homo sapiens OX=9606 GN=PSIP1;sp|O75475-2|PSIP1_HUMAN Isoform 2 of PC4 and SFRS1-in
28.1764	28.8717	28.7915	27.371	28.4252	28.673	28.2466	29.1834	29.2116	28.4869	28.2196	27.9039	28.7877	28.6326	28.3839	28.6094	28.6654	28.8344	28.6641	28.5617	27.7772	29.0238	28.8286	28.9658				5	5	5	24.6	24.6	24.6	30.241	0	72.806	10666000000	291	sp|O75489|NDUS3_HUMAN	sp|O75489|NDUS3_HUMAN	sp|O75489|NDUS3_HUMAN NADH dehydrogenase [ubiquinone] iron-sulfur protein 3, mitochondrial OS=Homo sapiens OX=9606 GN=NDUFS3 PE=1 SV=1
27.2948	27.2548	27.3275	26.7628	27.5	27.9409	26.1143	27.564	26.7099	26.6543	28.043	26.818	27.1841	27.1721	27.3088	26.4666	26.0193	26.8318	26.9532	27.2064	26.2378	27.378	26.8859	27.3718				3	3	2	23.6	23.6	17	20.117	0	6.748	3081300000	82	sp|O75494-5|SRS10_HUMAN;sp|O75494-4|SRS10_HUMAN;sp|O75494-6|SRS10_HUMAN;sp|O75494-3|SRS10_HUMAN;sp|O75494-2|SRS10_HUMAN;sp|O75494|SRS10_HUMAN	sp|O75494-5|SRS10_HUMAN;sp|O75494-4|SRS10_HUMAN;sp|O75494-6|SRS10_HUMAN;sp|O75494-3|SRS10_HUMAN;sp|O75494-2|SRS10_HUMAN;sp|O75494|SRS10_HUMAN	sp|O75494-5|SRS10_HUMAN Isoform 5 of Serine/arginine-rich splicing factor 10 OS=Homo sapiens OX=9606 GN=SRSF10;sp|O75494-4|SRS10_HUMAN Isoform 4 of Serine/arginine-rich splicing factor 10 OS=Homo sapiens OX=9606 GN=SRSF10;sp|O75494-6|SRS10_HUMAN Isoform 6
28.3991	28.2216	28.8399	28.8053	28.3961	28.3778	28.1942	28.4757	28.0677	28.4635	28.3522	28.5056	28.4373	28.1866	28.3254	28.3934	28.2364	28.5431	28.0894	28.2173	28.3331	28.2217	28.4918	28.3175				27	27	27	40.3	40.3	40.3	145.83	0	318.76	7493100000	473	sp|O75533|SF3B1_HUMAN;sp|O75533-2|SF3B1_HUMAN	sp|O75533|SF3B1_HUMAN	sp|O75533|SF3B1_HUMAN Splicing factor 3B subunit 1 OS=Homo sapiens OX=9606 GN=SF3B1 PE=1 SV=3
24.4767	23.741	24.8257	24.77	24.6486	24.5991	24.428	24.5957	25.0568	24.8098	25.1653	25.4254	24.5853	25.7429	25.6395	26.0248	23.9	25.3773	NaN	25.1178	24.2958	24.6109	24.8936	24.8143				6	6	6	10.3	10.3	10.3	85.746	0	172.71	705510000	87	sp|O75534-2|CSDE1_HUMAN;sp|O75534|CSDE1_HUMAN;sp|O75534-3|CSDE1_HUMAN;sp|O75534-4|CSDE1_HUMAN	sp|O75534-2|CSDE1_HUMAN;sp|O75534|CSDE1_HUMAN;sp|O75534-3|CSDE1_HUMAN;sp|O75534-4|CSDE1_HUMAN	sp|O75534-2|CSDE1_HUMAN Isoform 2 of Cold shock domain-containing protein E1 OS=Homo sapiens OX=9606 GN=CSDE1;sp|O75534|CSDE1_HUMAN Cold shock domain-containing protein E1 OS=Homo sapiens OX=9606 GN=CSDE1 PE=1 SV=2;sp|O75534-3|CSDE1_HUMAN Isoform 3 of Cold
26.5376	27.5516	26.161	28.3933	27.9394	26.5338	26.5072	27.3746	27.3061	27.725	27.2517	27.7821	27.0777	27.9269	28.5018	27.389	27.0802	26.5919	26.731	26.6071	26.1165	27.4285	27.6036	27.3155				4	4	4	21.2	21.2	21.2	31.635	0	34.327	5155300000	80	sp|O75569-3|PRKRA_HUMAN;sp|O75569-2|PRKRA_HUMAN;sp|O75569|PRKRA_HUMAN	sp|O75569-3|PRKRA_HUMAN;sp|O75569-2|PRKRA_HUMAN;sp|O75569|PRKRA_HUMAN	sp|O75569-3|PRKRA_HUMAN Isoform 3 of Interferon-inducible double-stranded RNA-dependent protein kinase activator A OS=Homo sapiens OX=9606 GN=PRKRA;sp|O75569-2|PRKRA_HUMAN Isoform 2 of Interferon-inducible double-stranded RNA-dependent protein kinase activ
23.9034	24.1894	24.4925	25.3359	25.1026	23.5387	24.1242	25.2248	25.1129	25.5323	23.9132	24.4793	25.5213	25.041	24.4615	24.6918	25.6994	25.2204	24.773	23.8922	24.8633	24.2851	23.2769	23.6587				8	8	8	16.8	16.8	16.8	89.864	0	18.747	743410000	37	sp|O75582|KS6A5_HUMAN;sp|O75582-3|KS6A5_HUMAN;sp|O75582-2|KS6A5_HUMAN	sp|O75582|KS6A5_HUMAN;sp|O75582-3|KS6A5_HUMAN;sp|O75582-2|KS6A5_HUMAN	sp|O75582|KS6A5_HUMAN Ribosomal protein S6 kinase alpha-5 OS=Homo sapiens OX=9606 GN=RPS6KA5 PE=1 SV=1;sp|O75582-3|KS6A5_HUMAN Isoform 3 of Ribosomal protein S6 kinase alpha-5 OS=Homo sapiens OX=9606 GN=RPS6KA5;sp|O75582-2|KS6A5_HUMAN Isoform 2 of Ribosoma
27.8716	27.8626	28.4312	26.6807	27.5295	27.7013	28.1332	28.0398	28.0994	26.7909	27.3412	27.6322	27.2599	27.3473	27.2717	28.3927	27.5727	27.9943	27.9691	28.4143	27.2082	27.5984	27.2305	27.4081				3	3	3	23.8	23.8	23.8	22.875	0	37.725	4790800000	90	sp|O75608-2|LYPA1_HUMAN;sp|O75608|LYPA1_HUMAN	sp|O75608-2|LYPA1_HUMAN;sp|O75608|LYPA1_HUMAN	sp|O75608-2|LYPA1_HUMAN Isoform 2 of Acyl-protein thioesterase 1 OS=Homo sapiens OX=9606 GN=LYPLA1;sp|O75608|LYPA1_HUMAN Acyl-protein thioesterase 1 OS=Homo sapiens OX=9606 GN=LYPLA1 PE=1 SV=1
29.2043	29.099	29.2582	28.9412	29.3594	29.1394	28.8878	29.1663	29.1533	29.3263	29.285	29.374	29.129	29.1144	29.0892	28.8645	28.8651	28.9873	28.9726	29.2906	29.0121	29.0493	29.0676	29.1281				53	53	53	39.4	39.4	39.4	244.5	0	323.31	12530000000	938	sp|O75643|U520_HUMAN;sp|O75643-2|U520_HUMAN	sp|O75643|U520_HUMAN	sp|O75643|U520_HUMAN U5 small nuclear ribonucleoprotein 200 kDa helicase OS=Homo sapiens OX=9606 GN=SNRNP200 PE=1 SV=2
24.9991	24.5854	NaN	25.0392	23.7878	24.9712	24.6828	25.6821	24.5718	24.3231	25.0461	24.2758	23.7378	23.9664	23.8201	NaN	NaN	24.2117	24.3834	25.0124	25.1061	23.9431	25.1014	24.3134				3	3	3	33.1	33.1	33.1	20.214	0.00034141	4.1924	617020000	12	sp|O75663-2|TIPRL_HUMAN;sp|O75663|TIPRL_HUMAN	sp|O75663-2|TIPRL_HUMAN;sp|O75663|TIPRL_HUMAN	sp|O75663-2|TIPRL_HUMAN Isoform 2 of TIP41-like protein OS=Homo sapiens OX=9606 GN=TIPRL;sp|O75663|TIPRL_HUMAN TIP41-like protein OS=Homo sapiens OX=9606 GN=TIPRL PE=1 SV=2
25.183	25.4684	26.0585	26.4857	24.0748	26.1998	24.9697	26.5459	25.5826	25.9174	25.8868	24.3504	26.3738	25.4365	25.6817	25.8988	NaN	26.1994	26.0399	26.0556	24.1691	25.8181	25.6873	25.8674				6	6	6	31.8	31.8	31.8	42.086	0	31.598	1522700000	79	sp|O75688-4|PPM1B_HUMAN;sp|O75688-2|PPM1B_HUMAN;sp|O75688|PPM1B_HUMAN;sp|O75688-5|PPM1B_HUMAN;sp|O75688-3|PPM1B_HUMAN	sp|O75688-4|PPM1B_HUMAN;sp|O75688-2|PPM1B_HUMAN;sp|O75688|PPM1B_HUMAN;sp|O75688-5|PPM1B_HUMAN	sp|O75688-4|PPM1B_HUMAN Isoform 4 of Protein phosphatase 1B OS=Homo sapiens OX=9606 GN=PPM1B;sp|O75688-2|PPM1B_HUMAN Isoform Beta-2 of Protein phosphatase 1B OS=Homo sapiens OX=9606 GN=PPM1B;sp|O75688|PPM1B_HUMAN Protein phosphatase 1B OS=Homo sapiens OX=9
24.6627	24.7428	25.1583	25.0053	23.3418	23.4747	24.304	24.3939	23.9281	23.7	23.7357	24.1485	24.0964	24.2783	23.9015	NaN	25.2744	24.3553	23.4238	23.7357	24.1971	24.6709	24.7282	24.0253				9	9	9	12.4	12.4	12.4	149.01	0	36.596	521050000	52	sp|O75694-2|NU155_HUMAN;sp|O75694|NU155_HUMAN	sp|O75694-2|NU155_HUMAN;sp|O75694|NU155_HUMAN	sp|O75694-2|NU155_HUMAN Isoform 2 of Nuclear pore complex protein Nup155 OS=Homo sapiens OX=9606 GN=NUP155;sp|O75694|NU155_HUMAN Nuclear pore complex protein Nup155 OS=Homo sapiens OX=9606 GN=NUP155 PE=1 SV=1
28.8403	29.5237	28.6503	29.1138	29.7874	29.291	28.5166	29.1383	29.6807	29.3711	28.9037	29.294	29.1367	29.23	29.1602	29.2213	29.7764	29.2359	29.351	29.3683	28.8978	29.3341	29.1614	29.2028				19	19	16	45.1	45.1	40.6	74.761	0	323.31	15733000000	622	sp|O75746|CMC1_HUMAN;sp|O75746-2|CMC1_HUMAN	sp|O75746|CMC1_HUMAN;sp|O75746-2|CMC1_HUMAN	sp|O75746|CMC1_HUMAN Calcium-binding mitochondrial carrier protein Aralar1 OS=Homo sapiens OX=9606 GN=SLC25A12 PE=1 SV=2;sp|O75746-2|CMC1_HUMAN Isoform 2 of Calcium-binding mitochondrial carrier protein Aralar1 OS=Homo sapiens OX=9606 GN=SLC25A12
25.243	24.9783	25.9041	25.028	25.1694	23.8137	25.1786	24.9506	23.8499	24.0403	25.4327	24.5299	24.9025	25.3182	25.532	NaN	25.7066	24.8765	24.4127	24.8378	25.5685	24.663	24.3641	24.7563				4	4	4	21.6	21.6	21.6	35.611	0	53.447	844350000	67	sp|O75821|EIF3G_HUMAN	sp|O75821|EIF3G_HUMAN	sp|O75821|EIF3G_HUMAN Eukaryotic translation initiation factor 3 subunit G OS=Homo sapiens OX=9606 GN=EIF3G PE=1 SV=2
28.5147	28.108	27.6592	28.0566	28.0991	27.8487	28.2047	27.9763	28.1397	28.5563	28.2298	28.2459	27.2971	27.4309	27.8361	27.7172	27.7281	28.1347	27.696	27.5541	28.0523	27.7509	27.8508	28.0052				12	11	11	32.6	30.4	30.4	46.659	0	323.31	6443400000	207	sp|O75874|IDHC_HUMAN	sp|O75874|IDHC_HUMAN	sp|O75874|IDHC_HUMAN Isocitrate dehydrogenase [NADP] cytoplasmic OS=Homo sapiens OX=9606 GN=IDH1 PE=1 SV=2
25.8091	25.8009	25.2975	26.0551	25.4134	26.0108	25.629	25.2844	22.9761	25.9847	25.6385	25.7119	25.99	25.8996	25.8486	25.445	26.1686	26.4001	25.1636	26.3721	24.6915	25.5984	26.0393	25.4819				8	8	4	27.2	27.2	14.2	60.692	0	196.88	1564300000	159	sp|O75914-2|PAK3_HUMAN;sp|O75914|PAK3_HUMAN;sp|O75914-4|PAK3_HUMAN;sp|O75914-3|PAK3_HUMAN	sp|O75914-2|PAK3_HUMAN;sp|O75914|PAK3_HUMAN;sp|O75914-4|PAK3_HUMAN;sp|O75914-3|PAK3_HUMAN	sp|O75914-2|PAK3_HUMAN Isoform 2 of Serine/threonine-protein kinase PAK 3 OS=Homo sapiens OX=9606 GN=PAK3;sp|O75914|PAK3_HUMAN Serine/threonine-protein kinase PAK 3 OS=Homo sapiens OX=9606 GN=PAK3 PE=1 SV=2;sp|O75914-4|PAK3_HUMAN Isoform 4 of Serine/threon
22.4429	22.6021	NaN	23.6804	23.7991	23.5546	NaN	22.7473	23.2028	24.3499	23.1826	23.5268	23.6038	23.9926	23.4772	24.4671	23.7701	24.2684	23.7069	24.4446	22.6082	22.4178	23.243	22.7523				3	3	3	13.4	13.4	13.4	56.776	0	35.827	221240000	58	sp|O75916-3|RGS9_HUMAN;sp|O75916-4|RGS9_HUMAN;sp|O75916-2|RGS9_HUMAN;sp|O75916-5|RGS9_HUMAN;sp|O75916|RGS9_HUMAN	sp|O75916-3|RGS9_HUMAN;sp|O75916-4|RGS9_HUMAN;sp|O75916-2|RGS9_HUMAN;sp|O75916-5|RGS9_HUMAN;sp|O75916|RGS9_HUMAN	sp|O75916-3|RGS9_HUMAN Isoform 3 of Regulator of G-protein signaling 9 OS=Homo sapiens OX=9606 GN=RGS9;sp|O75916-4|RGS9_HUMAN Isoform 4 of Regulator of G-protein signaling 9 OS=Homo sapiens OX=9606 GN=RGS9;sp|O75916-2|RGS9_HUMAN Isoform 2 of Regulator of G
24.9499	25.5916	25.3076	25.8711	26.5711	25.5852	24.2592	24.8021	24.9836	25.0916	26.6245	25.8641	25.8368	26.1481	26.4734	26.0306	25.9206	27.0225	26.0685	27.1899	26.391	25.063	25.3847	25.3606				2	2	2	21.3	21.3	21.3	26.131	0	166.74	1469600000	38	sp|O75934|SPF27_HUMAN	sp|O75934|SPF27_HUMAN	sp|O75934|SPF27_HUMAN Pre-mRNA-splicing factor SPF27 OS=Homo sapiens OX=9606 GN=BCAS2 PE=1 SV=1
23.313	23.4893	22.7334	22.243	24.3956	24.2807	23.6366	23.7204	NaN	24.8518	24.2587	25.2805	24.2362	24.0028	23.8353	24.6533	24.1727	23.8693	23.9957	23.3627	24.4875	22.7961	23.4797	23.4814				2	2	2	14.6	14.6	14.6	29.841	0	29.324	274510000	42	sp|O75937|DNJC8_HUMAN	sp|O75937|DNJC8_HUMAN	sp|O75937|DNJC8_HUMAN DnaJ homolog subfamily C member 8 OS=Homo sapiens OX=9606 GN=DNAJC8 PE=1 SV=2
24.2726	23.8007	24.0472	22.118	22.581	23.3551	22.6668	23.2369	24.0471	23.5274	22.9657	22.3727	22.9915	24.5981	23.6968	NaN	22.8492	23.014	23.421	24.0762	NaN	23.5977	23.5058	23.2288				8	8	8	6.2	6.2	6.2	287.37	0	8.6669	210770000	17	sp|O75962-5|TRIO_HUMAN;sp|O75962-2|TRIO_HUMAN;sp|O75962|TRIO_HUMAN;sp|O75962-4|TRIO_HUMAN	sp|O75962-5|TRIO_HUMAN;sp|O75962-2|TRIO_HUMAN;sp|O75962|TRIO_HUMAN;sp|O75962-4|TRIO_HUMAN	sp|O75962-5|TRIO_HUMAN Isoform 5 of Triple functional domain protein OS=Homo sapiens OX=9606 GN=TRIO;sp|O75962-2|TRIO_HUMAN Isoform 2 of Triple functional domain protein OS=Homo sapiens OX=9606 GN=TRIO;sp|O75962|TRIO_HUMAN Triple functional domain protein
22.5545	23.546	NaN	22.3285	23.1898	22.7207	23.3199	22.4715	22.8506	NaN	21.7754	23.4149	21.7703	NaN	23.2066	23.0639	22.0556	23.1601	22.432	23.1688	22.9409	22.3785	21.7548	22.6311				4	4	4	4.8	4.8	4.8	214.8	0	38.486	123350000	20	sp|O75970-5|MPDZ_HUMAN;sp|O75970-3|MPDZ_HUMAN;sp|O75970-2|MPDZ_HUMAN;sp|O75970|MPDZ_HUMAN	sp|O75970-5|MPDZ_HUMAN;sp|O75970-3|MPDZ_HUMAN;sp|O75970-2|MPDZ_HUMAN;sp|O75970|MPDZ_HUMAN	sp|O75970-5|MPDZ_HUMAN Isoform 4 of Multiple PDZ domain protein OS=Homo sapiens OX=9606 GN=MPDZ;sp|O75970-3|MPDZ_HUMAN Isoform 3 of Multiple PDZ domain protein OS=Homo sapiens OX=9606 GN=MPDZ;sp|O75970-2|MPDZ_HUMAN Isoform 2 of Multiple PDZ domain protein
24.91	24.9642	23.7827	24.5885	24.2507	23.8801	24.4241	24.2847	25.3787	25.5933	23.9286	24.3172	25.1384	24.6941	25.5219	26.1479	24.8188	25.728	26.2083	24.9082	24.6382	24.6344	23.6568	24.5104				6	6	5	32.6	32.6	28.9	31.196	0	76.479	798380000	69	sp|O76041-2|NEBL_HUMAN;sp|O76041|NEBL_HUMAN	sp|O76041-2|NEBL_HUMAN;sp|O76041|NEBL_HUMAN	sp|O76041-2|NEBL_HUMAN Isoform 2 of Nebulette OS=Homo sapiens OX=9606 GN=NEBL;sp|O76041|NEBL_HUMAN Nebulette OS=Homo sapiens OX=9606 GN=NEBL PE=1 SV=1
25.0135	25.4444	25.575	25.3687	24.6816	24.4079	25.3247	25.1338	24.6858	24.3294	23.996	24.4796	25.4099	25.0715	24.5118	25.3558	25.3179	25.0431	24.1939	21.5955	24.7179	25.1041	25.0369	24.594				4	4	4	12.8	12.8	12.8	74.605	0	42.343	722840000	51	sp|O76094|SRP72_HUMAN;sp|O76094-2|SRP72_HUMAN	sp|O76094|SRP72_HUMAN;sp|O76094-2|SRP72_HUMAN	sp|O76094|SRP72_HUMAN Signal recognition particle subunit SRP72 OS=Homo sapiens OX=9606 GN=SRP72 PE=1 SV=3;sp|O76094-2|SRP72_HUMAN Isoform 2 of Signal recognition particle subunit SRP72 OS=Homo sapiens OX=9606 GN=SRP72
26.3747	25.7057	27.1969	25.0393	26.0923	25.8793	26.5465	26.0686	25.4836	25.0628	26.4806	26.6483	25.4923	24.9063	26.8107	26.0442	25.5364	24.7385	25.0864	24.9362	24.7174	24.4578	25.1672	23.1867				9	9	6	19.6	19.6	13.7	84.523	0	134.41	1477200000	110	sp|O77564|FOLH1_PIG;sp|Q04609-10|FOLH1_HUMAN;sp|Q9HBA9|FOH1B_HUMAN	sp|O77564|FOLH1_PIG	sp|O77564|FOLH1_PIG Glutamate carboxypeptidase 2 OS=Sus scrofa OX=9823 GN=FOLH1 PE=1 SV=1
26.9626	26.6331	24.9287	26.5211	26.254	26.5815	26.7522	26.9731	26.8528	26.9995	25.09	27.1486	26.408	26.7995	26.6364	27.7472	26.4819	26.7998	25.6947	26.5745	26.207	26.9967	26.3126	26.7973				5	5	5	31.4	31.4	31.4	30.132	0	323.31	3021300000	129	sp|O77591|IMPA1_PIG;sp|P29218-2|IMPA1_HUMAN;sp|P29218|IMPA1_HUMAN	sp|O77591|IMPA1_PIG	sp|O77591|IMPA1_PIG Inositol monophosphatase 1 OS=Sus scrofa OX=9823 GN=IMPA1 PE=2 SV=1
26.9742	26.4342	26.4185	26.8584	26.9001	26.1669	26.7112	26.9371	27.3322	26.7669	27.219	26.2621	26.6878	27.2093	26.6857	26.7615	27.4574	26.9858	26.7429	26.6106	26.544	26.223	26.9283	26.6852				5	5	5	24	24	24	37.919	0	248.37	2745400000	105	sp|O77735|SCAM1_PIG;sp|O15126-2|SCAM1_HUMAN;sp|O15126|SCAM1_HUMAN	sp|O77735|SCAM1_PIG	sp|O77735|SCAM1_PIG Secretory carrier-associated membrane protein 1 OS=Sus scrofa OX=9823 GN=SCAMP1 PE=2 SV=1
25.8586	27.0383	24.5075	26.1669	26.5722	27.4253	25.9345	26.315	26.0362	25.4363	26.2427	25.9241	26.2551	26.4279	26.0346	26.0657	26.3372	26.2938	26.262	27.2366	25.7969	26.3598	25.6923	25.5683				5	5	5	14.5	14.5	14.5	35.647	0	83.428	2166300000	94	sp|O79874|NU1M_PIG;sp|P03886|NU1M_HUMAN	sp|O79874|NU1M_PIG	sp|O79874|NU1M_PIG NADH-ubiquinone oxidoreductase chain 1 OS=Sus scrofa OX=9823 GN=MT-ND1 PE=1 SV=1
24.7504	23.7625	23.833	22.9084	23.0127	24.2359	23.7944	23.6392	24.5857	22.328	22.9604	25.0897	24.444	23.6469	24.5853	23.7103	24.8491	24.3202	24.2733	25.872	24.4433	23.5701	25.2311	25.3996				2	2	2	11.5	11.5	11.5	39.055	0	14.021	863340000	79	sp|O79875|NU2M_PIG	sp|O79875|NU2M_PIG	sp|O79875|NU2M_PIG NADH-ubiquinone oxidoreductase chain 2 OS=Sus scrofa OX=9823 GN=MT-ND2 PE=1 SV=2
28.7062	28.5259	27.9199	26.0328	29.7936	29.3204	28.1977	29.2938	29.7843	29.4732	29.1062	29.8849	29.0832	25.9992	25.2646	28.8957	NaN	29.8193	29.2347	29.0757	28.9178	29.7096	29.1621	29.2416				3	3	3	10.1	10.1	10.1	56.958	0	11.422	11071000000	65	sp|O79876|COX1_PIG;sp|P00395|COX1_HUMAN	sp|O79876|COX1_PIG	sp|O79876|COX1_PIG Cytochrome c oxidase subunit 1 OS=Sus scrofa OX=9823 GN=MT-CO1 PE=3 SV=2
25.2589	25.7411	23.3244	23.0757	26.3882	25.0143	25.0063	26.2233	25.864	24.933	23.0012	25.4335	24.6296	24.7953	23.7534	25.6625	25.2999	24.5213	21.9804	24.8091	23.2778	25.105	24.9041	24.7411				4	4	4	14.6	14.6	14.6	51.824	0	162.06	1140900000	113	sp|O79881|NU4M_PIG;sp|P03905|NU4M_HUMAN	sp|O79881|NU4M_PIG;sp|P03905|NU4M_HUMAN	sp|O79881|NU4M_PIG NADH-ubiquinone oxidoreductase chain 4 OS=Sus scrofa OX=9823 GN=MT-ND4 PE=1 SV=2;sp|P03905|NU4M_HUMAN NADH-ubiquinone oxidoreductase chain 4 OS=Homo sapiens OX=9606 GN=MT-ND4 PE=1 SV=1
25.3927	24.8247	25.9928	25.5161	25.7479	25.6756	24.9384	25.5558	25.3944	24.9145	25.588	26.1323	24.8012	25.3326	25.4988	25.4554	23.8387	26.2062	25.4329	25.8429	25.2423	25.193	25.3452	25.5981				9	9	8	21.3	21.3	19.8	75.022	0	117.26	1102900000	93	sp|O94776|MTA2_HUMAN;sp|O94776-2|MTA2_HUMAN	sp|O94776|MTA2_HUMAN;sp|O94776-2|MTA2_HUMAN	sp|O94776|MTA2_HUMAN Metastasis-associated protein MTA2 OS=Homo sapiens OX=9606 GN=MTA2 PE=1 SV=1;sp|O94776-2|MTA2_HUMAN Isoform 2 of Metastasis-associated protein MTA2 OS=Homo sapiens OX=9606 GN=MTA2
27.357	28.4648	27.4372	27.6195	28.0998	28.0164	27.6315	28.2097	28.47	28.0811	27.9376	27.7821	27.8232	28.1168	27.5625	29.1519	28.1315	28.3652	28.0856	28.2943	27.7398	27.9702	27.7681	27.9482				13	13	13	33.7	33.7	33.7	67.454	0	323.31	6737900000	428	sp|O94826|TOM70_HUMAN	sp|O94826|TOM70_HUMAN	sp|O94826|TOM70_HUMAN Mitochondrial import receptor subunit TOM70 OS=Homo sapiens OX=9606 GN=TOMM70 PE=1 SV=1
26.5747	26.8252	25.7803	26.7348	26.6472	27.6757	27.0598	26.7708	27.5654	27.515	26.6812	27.2589	26.6513	27.2571	27.3173	27.5122	27.7595	27.4875	27.8024	27.8886	26.6992	27.3503	27.4637	27.2341				13	13	13	15.1	15.1	15.1	137.61	0	167.72	3466700000	241	sp|O94856-9|NFASC_HUMAN;sp|O94856-4|NFASC_HUMAN;sp|O94856-12|NFASC_HUMAN;sp|O94856-6|NFASC_HUMAN;sp|O94856-13|NFASC_HUMAN;sp|O94856-5|NFASC_HUMAN;sp|O94856|NFASC_HUMAN;sp|O94856-10|NFASC_HUMAN;sp|O94856-3|NFASC_HUMAN;sp|O94856-8|NFASC_HUMAN;sp|O94856-11|NFASC_HUMAN;sp|O94856-7|NFASC_HUMAN;sp|O94856-2|NFASC_HUMAN	sp|O94856-9|NFASC_HUMAN;sp|O94856-4|NFASC_HUMAN;sp|O94856-12|NFASC_HUMAN;sp|O94856-6|NFASC_HUMAN;sp|O94856-13|NFASC_HUMAN;sp|O94856-5|NFASC_HUMAN;sp|O94856|NFASC_HUMAN;sp|O94856-10|NFASC_HUMAN;sp|O94856-3|NFASC_HUMAN;sp|O94856-8|NFASC_HUMAN;sp|O94856-11|NFASC_HUMAN;sp|O94856-7|NFASC_HUMAN;sp|O94856-2|NFASC_HUMAN	sp|O94856-9|NFASC_HUMAN Isoform 9 of Neurofascin OS=Homo sapiens OX=9606 GN=NFASC;sp|O94856-4|NFASC_HUMAN Isoform 4 of Neurofascin OS=Homo sapiens OX=9606 GN=NFASC;sp|O94856-12|NFASC_HUMAN Isoform 12 of Neurofascin OS=Homo sapiens OX=9606 GN=NFASC;sp|O9485
24.4434	24.2003	24.7948	24.8605	24.4943	24.2486	24.909	24.1447	24.82	24.3886	24.111	25.3499	25.308	25.447	25.2319	25.4813	24.4196	25.2056	23.1607	24.9608	24.223	24.758	24.5822	24.7649				7	7	3	16.7	16.7	8	82.097	0	76.58	627510000	60	sp|O94874-2|UFL1_HUMAN;sp|O94874|UFL1_HUMAN	sp|O94874-2|UFL1_HUMAN;sp|O94874|UFL1_HUMAN	sp|O94874-2|UFL1_HUMAN Isoform 2 of E3 UFM1-protein ligase 1 OS=Homo sapiens OX=9606 GN=UFL1;sp|O94874|UFL1_HUMAN E3 UFM1-protein ligase 1 OS=Homo sapiens OX=9606 GN=UFL1 PE=1 SV=2
27.2351	27.1055	27.6106	27.112	27.3086	26.9413	27.3668	26.6189	27.0923	27.5751	26.7717	28.263	27.286	27.0553	27.1358	NaN	26.9629	27.1349	26.9726	27.1248	28.2522	26.8945	26.7582	27.0228				5	5	5	12	12	12	74.777	0	13.698	3906100000	97	sp|O94875-2|SRBS2_HUMAN;sp|O94875-9|SRBS2_HUMAN;sp|O94875-5|SRBS2_HUMAN;sp|O94875-3|SRBS2_HUMAN;sp|O94875-8|SRBS2_HUMAN;sp|O94875-4|SRBS2_HUMAN;sp|O94875-12|SRBS2_HUMAN;sp|O94875-10|SRBS2_HUMAN;sp|O94875|SRBS2_HUMAN;sp|O94875-11|SRBS2_HUMAN;sp|O94875-7|SRBS2_HUMAN;sp|O94875-6|SRBS2_HUMAN;sp|P28220|SRBS2_PIG	sp|O94875-2|SRBS2_HUMAN;sp|O94875-9|SRBS2_HUMAN;sp|O94875-5|SRBS2_HUMAN;sp|O94875-3|SRBS2_HUMAN;sp|O94875-8|SRBS2_HUMAN;sp|O94875-4|SRBS2_HUMAN;sp|O94875-12|SRBS2_HUMAN;sp|O94875-10|SRBS2_HUMAN;sp|O94875|SRBS2_HUMAN;sp|O94875-11|SRBS2_HUMAN;sp|O94875-7|SRBS2_HUMAN	sp|O94875-2|SRBS2_HUMAN Isoform 2 of Sorbin and SH3 domain-containing protein 2 OS=Homo sapiens OX=9606 GN=SORBS2;sp|O94875-9|SRBS2_HUMAN Isoform 9 of Sorbin and SH3 domain-containing protein 2 OS=Homo sapiens OX=9606 GN=SORBS2;sp|O94875-5|SRBS2_HUMAN Isof
25.3954	25.4842	25.4165	25.0406	25.3935	25.5577	25.1966	25.2014	25.3247	25.2451	24.2237	25.0961	24.9119	25.2056	24.558	25.156	25.2548	25.2074	25.6138	25.0214	25.0253	25.5079	25.0865	25.1897				5	5	5	18.2	18.2	18.2	54.862	0	63.17	1034900000	119	sp|O94888|UBXN7_HUMAN	sp|O94888|UBXN7_HUMAN	sp|O94888|UBXN7_HUMAN UBX domain-containing protein 7 OS=Homo sapiens OX=9606 GN=UBXN7 PE=1 SV=2
26.5879	26.5513	26.5608	26.9437	26.4743	26.8614	26.2636	26.8796	26.9563	27.5719	26.1965	27.4355	26.2314	26.3406	26.1249	26.6213	25.3886	26.6703	27.9759	27.2105	27.3223	26.7794	25.8556	26.0457				5	5	4	28.3	28.3	24.8	37.839	0	169.25	2488200000	173	sp|O94905|ERLN2_HUMAN;sp|O94905-2|ERLN2_HUMAN;sp|O94905-3|ERLN2_HUMAN	sp|O94905|ERLN2_HUMAN	sp|O94905|ERLN2_HUMAN Erlin-2 OS=Homo sapiens OX=9606 GN=ERLIN2 PE=1 SV=1
28.8811	29.1595	28.577	29.1468	28.9259	28.4571	28.688	28.986	28.7416	28.958	28.3984	28.8233	28.8986	28.9642	28.9153	30.0251	29.4328	29.2948	29.5771	29.7543	28.8609	29.3923	29.2508	29.7918				15	15	2	33.8	33.8	4.3	73.46	0	323.31	14013000000	378	sp|O94925|GLSK_HUMAN;sp|O94925-2|GLSK_HUMAN	sp|O94925|GLSK_HUMAN	sp|O94925|GLSK_HUMAN Glutaminase kidney isoform, mitochondrial OS=Homo sapiens OX=9606 GN=GLS PE=1 SV=1
22.9176	23.6817	22.6975	22.2977	23.7551	24.3939	22.4036	22.4009	23.3471	21.4065	21.3596	25.7638	22.5509	NaN	NaN	23.3047	23.2271	23.8197	22.4593	22.7945	21.9294	22.8298	23.0862	22.6897				4	4	4	5.4	5.4	5.4	98.515	0	14.008	273910000	39	sp|O94967-2|WDR47_HUMAN;sp|O94967|WDR47_HUMAN;sp|O94967-3|WDR47_HUMAN;sp|O94967-4|WDR47_HUMAN	sp|O94967-2|WDR47_HUMAN;sp|O94967|WDR47_HUMAN;sp|O94967-3|WDR47_HUMAN;sp|O94967-4|WDR47_HUMAN	sp|O94967-2|WDR47_HUMAN Isoform 2 of WD repeat-containing protein 47 OS=Homo sapiens OX=9606 GN=WDR47;sp|O94967|WDR47_HUMAN WD repeat-containing protein 47 OS=Homo sapiens OX=9606 GN=WDR47 PE=1 SV=1;sp|O94967-3|WDR47_HUMAN Isoform 3 of WD repeat-containing
25.3487	25.4653	25.0143	24.2238	25.4833	24.3042	25.1686	25.1833	24.2933	25.9856	24.5841	25.4422	24.6205	25.0548	25.3157	25.7382	24.8949	23.5449	24.3446	23.6744	25.3498	25.4416	24.4592	24.5033				6	6	6	10.6	10.6	10.6	105.75	0	135.77	737690000	144	sp|O94979-7|SC31A_HUMAN;sp|O94979-6|SC31A_HUMAN;sp|O94979-3|SC31A_HUMAN;sp|O94979-10|SC31A_HUMAN;sp|O94979-4|SC31A_HUMAN;sp|O94979-9|SC31A_HUMAN;sp|O94979-2|SC31A_HUMAN;sp|O94979|SC31A_HUMAN;sp|O94979-8|SC31A_HUMAN;sp|O94979-5|SC31A_HUMAN	sp|O94979-7|SC31A_HUMAN;sp|O94979-6|SC31A_HUMAN;sp|O94979-3|SC31A_HUMAN;sp|O94979-10|SC31A_HUMAN;sp|O94979-4|SC31A_HUMAN;sp|O94979-9|SC31A_HUMAN;sp|O94979-2|SC31A_HUMAN;sp|O94979|SC31A_HUMAN;sp|O94979-8|SC31A_HUMAN;sp|O94979-5|SC31A_HUMAN	sp|O94979-7|SC31A_HUMAN Isoform 7 of Protein transport protein Sec31A OS=Homo sapiens OX=9606 GN=SEC31A;sp|O94979-6|SC31A_HUMAN Isoform 6 of Protein transport protein Sec31A OS=Homo sapiens OX=9606 GN=SEC31A;sp|O94979-3|SC31A_HUMAN Isoform 3 of Protein tra
24.2409	24.5537	25.3451	25.9788	23.9855	25.6597	23.8271	23.9377	24.2694	24.2126	19.3138	24.4403	23.951	23.6119	23.3081	24.1541	24.4016	24.2946	NaN	25.1915	24.5556	23.909	24.8161	24.1424				5	5	5	9	9	9	123.64	0	6.7205	488180000	43	sp|O95104-2|SFR15_HUMAN;sp|O95104-3|SFR15_HUMAN;sp|O95104|SFR15_HUMAN;sp|Q9UPN6|SCAF8_HUMAN;sp|Q9UPN6-2|SCAF8_HUMAN	sp|O95104-2|SFR15_HUMAN;sp|O95104-3|SFR15_HUMAN;sp|O95104|SFR15_HUMAN	sp|O95104-2|SFR15_HUMAN Isoform 2 of Splicing factor, arginine/serine-rich 15 OS=Homo sapiens OX=9606 GN=SCAF4;sp|O95104-3|SFR15_HUMAN Isoform 3 of Splicing factor, arginine/serine-rich 15 OS=Homo sapiens OX=9606 GN=SCAF4;sp|O95104|SFR15_HUMAN Splicing fac
24.6953	25.553	25.549	25.3761	24.8245	24.5898	25.1977	24.8116	25.2568	23.9275	24.8578	24.4388	23.8031	25.3843	NaN	25.2212	26.0534	25.0353	25.4449	24.8656	25.8163	24.6442	24.6092	25.1068				5	5	5	10	10	10	83.353	0	13.54	752320000	66	sp|O95202|LETM1_HUMAN;sp|O95202-2|LETM1_HUMAN;sp|O95202-3|LETM1_HUMAN	sp|O95202|LETM1_HUMAN	sp|O95202|LETM1_HUMAN Mitochondrial proton/calcium exchanger protein OS=Homo sapiens OX=9606 GN=LETM1 PE=1 SV=1
25.5395	25.4985	25.4672	24.8688	25.6799	25.0913	25.2274	25.1634	25.2947	25.4625	24.8664	25.4529	25.433	24.7622	25.3342	27.908	23.4927	24.3498	25.1472	24.4286	24.4512	25.2342	25.0043	25.1649				7	7	7	20.1	20.1	20.1	51.466	0	72.045	1030400000	135	sp|O95232|LC7L3_HUMAN;sp|O95232-2|LC7L3_HUMAN	sp|O95232|LC7L3_HUMAN	sp|O95232|LC7L3_HUMAN Luc7-like protein 3 OS=Homo sapiens OX=9606 GN=LUC7L3 PE=1 SV=2
22.8123	23.0667	23.5567	23.076	22.8298	22.7707	22.8967	22.8143	22.699	22.4651	22.7833	23.4059	23.2966	22.9321	23.1523	NaN	23.4463	23.2864	NaN	24.0587	23.7222	22.4319	22.743	22.8627				5	5	5	5.2	5.2	5.2	208.44	0.00034072	4.1773	184220000	25	sp|O95248|MTMR5_HUMAN;sp|O95248-5|MTMR5_HUMAN;sp|O95248-4|MTMR5_HUMAN	sp|O95248|MTMR5_HUMAN;sp|O95248-5|MTMR5_HUMAN;sp|O95248-4|MTMR5_HUMAN	sp|O95248|MTMR5_HUMAN Myotubularin-related protein 5 OS=Homo sapiens OX=9606 GN=SBF1 PE=1 SV=4;sp|O95248-5|MTMR5_HUMAN Isoform 5 of Myotubularin-related protein 5 OS=Homo sapiens OX=9606 GN=SBF1;sp|O95248-4|MTMR5_HUMAN Isoform 4 of Myotubularin-related pro
25.0996	24.2285	24.4433	25.009	NaN	25.2328	24.6415	25.2311	24.5986	23.5814	24.3414	24.2428	24.4954	25.4666	24.4338	NaN	24.0691	23.7674	24.7039	24.7512	24.2727	24.2468	24.2995	25.0343				3	3	3	38.2	38.2	38.2	14.874	0	5.8394	570650000	32	sp|O95295|SNAPN_HUMAN	sp|O95295|SNAPN_HUMAN	sp|O95295|SNAPN_HUMAN SNARE-associated protein Snapin OS=Homo sapiens OX=9606 GN=SNAPIN PE=1 SV=1
26.6109	27.3611	24.5369	25.2053	23.6718	25.6433	26.0779	27.6484	27.9402	25.1005	NaN	23.0902	25.8445	26.1148	25.5922	25.4115	25.0996	25.6355	26.0517	NaN	NaN	26.4855	27.6502	27.0478				2	2	2	13	13	13	40.75	0.0053548	2.0162	2068900000	34	sp|O95299|NDUAA_HUMAN;sp|O95299-2|NDUAA_HUMAN	sp|O95299|NDUAA_HUMAN;sp|O95299-2|NDUAA_HUMAN	sp|O95299|NDUAA_HUMAN NADH dehydrogenase [ubiquinone] 1 alpha subcomplex subunit 10, mitochondrial OS=Homo sapiens OX=9606 GN=NDUFA10 PE=1 SV=1;sp|O95299-2|NDUAA_HUMAN Isoform 2 of NADH dehydrogenase [ubiquinone] 1 alpha subcomplex subunit 10, mitochondria
25.0135	24.9267	25.198	24.9135	25.2698	24.2632	24.5562	24.7482	25.7456	26.2433	24.5211	25.2912	24.8444	25.1247	25.8991	26.6926	25.18	24.8203	25.0422	24.8844	25.0681	24.7524	24.7544	25.012				4	4	3	15.4	15.4	13.3	52.054	0	175.2	749740000	57	sp|O95319-5|CELF2_HUMAN;sp|O95319-2|CELF2_HUMAN;sp|O95319|CELF2_HUMAN;sp|O95319-4|CELF2_HUMAN;sp|O95319-3|CELF2_HUMAN	sp|O95319-5|CELF2_HUMAN;sp|O95319-2|CELF2_HUMAN;sp|O95319|CELF2_HUMAN;sp|O95319-4|CELF2_HUMAN;sp|O95319-3|CELF2_HUMAN	sp|O95319-5|CELF2_HUMAN Isoform 5 of CUGBP Elav-like family member 2 OS=Homo sapiens OX=9606 GN=CELF2;sp|O95319-2|CELF2_HUMAN Isoform 2 of CUGBP Elav-like family member 2 OS=Homo sapiens OX=9606 GN=CELF2;sp|O95319|CELF2_HUMAN CUGBP Elav-like family member
25.721	26.329	26.3441	26.0013	26.1633	27.482	26.865	25.0968	25.6931	26.9675	26.4185	26.8779	26.4187	25.4687	26.0287	26.576	26.3304	23.6166	24.36	26.1068	25.2778	26.389	26.232	26.9457				4	4	4	18.6	18.6	18.6	27.547	0	38.391	2374100000	114	sp|O95336|6PGL_HUMAN	sp|O95336|6PGL_HUMAN	sp|O95336|6PGL_HUMAN 6-phosphogluconolactonase OS=Homo sapiens OX=9606 GN=PGLS PE=1 SV=2
23.4326	23.4807	24.1757	23.6717	23.5169	24.5308	23.5038	23.5361	23.4663	23.5062	23.8	24.0525	NaN	23.1548	23.7177	24.3378	23.7872	23.176	21.7683	23.931	23.5418	23.7024	23.5434	23.5386				6	6	6	11.1	11.1	11.1	77.959	0	12.57	290380000	71	sp|O95352|ATG7_HUMAN;sp|O95352-3|ATG7_HUMAN;sp|O95352-2|ATG7_HUMAN	sp|O95352|ATG7_HUMAN;sp|O95352-3|ATG7_HUMAN;sp|O95352-2|ATG7_HUMAN	sp|O95352|ATG7_HUMAN Ubiquitin-like modifier-activating enzyme ATG7 OS=Homo sapiens OX=9606 GN=ATG7 PE=1 SV=1;sp|O95352-3|ATG7_HUMAN Isoform 3 of Ubiquitin-like modifier-activating enzyme ATG7 OS=Homo sapiens OX=9606 GN=ATG7;sp|O95352-2|ATG7_HUMAN Isoform
26.4297	25.781	25.685	25.4916	26.5475	25.6671	25.6094	25.7728	24.7599	26.8164	25.1285	25.7639	24.9307	25.3078	23.1405	NaN	25.7031	26.3066	25.0718	26.257	25.6627	25.2181	25.3295	25.3676				4	4	4	29.9	29.9	29.9	24.737	0	18.53	1292200000	61	sp|O95372|LYPA2_HUMAN	sp|O95372|LYPA2_HUMAN	sp|O95372|LYPA2_HUMAN Acyl-protein thioesterase 2 OS=Homo sapiens OX=9606 GN=LYPLA2 PE=1 SV=1
28.2991	28.1053	28.7026	28.0189	28.542	28.108	28.2787	28.2521	27.8233	28.3383	27.9236	28.2207	27.8535	28.3933	28.055	27.6599	28.2375	27.986	28.1111	28.091	28.1436	28.3412	28.1065	28.2138				23	23	22	34	34	33	119.52	0	323.31	7701600000	506	sp|O95373|IPO7_HUMAN	sp|O95373|IPO7_HUMAN	sp|O95373|IPO7_HUMAN Importin-7 OS=Homo sapiens OX=9606 GN=IPO7 PE=1 SV=1
27.3589	18.6987	26.2967	27.2303	29.3312	28.8207	26.8766	27.4244	28.3506	28.3622	28.3291	27.4452	29.1098	28.6743	29.0374	NaN	28.0587	29.3315	28.7791	29.2054	28.8626	28.1966	27.7901	29.3825				2	2	2	3.4	3.4	3.4	105.81	0.0062877	1.8833	7956600000	34	sp|O95427|PIGN_HUMAN	sp|O95427|PIGN_HUMAN	sp|O95427|PIGN_HUMAN GPI ethanolamine phosphate transferase 1 OS=Homo sapiens OX=9606 GN=PIGN PE=1 SV=1
24.2386	24.3502	24.5957	23.7662	24.2501	23.7327	24.3407	24.8805	24.4704	24.0761	24.4649	24.0663	24.0588	22.3907	23.6559	23.1593	23.594	23.9822	24.7313	24.0391	24.4059	24.0914	23.9748	23.2867				6	6	6	9.6	9.6	9.6	119.75	0	188.12	432650000	83	sp|O95486|SC24A_HUMAN;sp|O95486-2|SC24A_HUMAN	sp|O95486|SC24A_HUMAN;sp|O95486-2|SC24A_HUMAN	sp|O95486|SC24A_HUMAN Protein transport protein Sec24A OS=Homo sapiens OX=9606 GN=SEC24A PE=1 SV=2;sp|O95486-2|SC24A_HUMAN Isoform 2 of Protein transport protein Sec24A OS=Homo sapiens OX=9606 GN=SEC24A
24.0603	25.1699	23.314	24.6074	23.9767	24.2864	25.2178	24.9848	25.0777	22.9177	21.7638	25.8101	24.0868	23.8942	23.4924	24.6729	25.2343	26.2466	24.6805	22.8244	26.4631	25.0662	24.3238	25.4305				3	3	3	28.3	28.3	28.3	14.279	0	6.6687	963280000	110	sp|O95563|MPC2_HUMAN	sp|O95563|MPC2_HUMAN	sp|O95563|MPC2_HUMAN Mitochondrial pyruvate carrier 2 OS=Homo sapiens OX=9606 GN=MPC2 PE=1 SV=1
25.1894	25.0832	23.7045	24.8881	25.8203	24.6239	23.6751	24.5579	24.863	24.3594	24.2727	25.1958	25.0358	24.5908	25.3312	25.1512	24.3816	24.879	25.3293	25.4428	NaN	24.9121	24.1922	24.4289				4	4	3	8.9	8.9	6.4	80.419	0.0003639	5.3385	527360000	33	sp|O95573|ACSL3_HUMAN	sp|O95573|ACSL3_HUMAN	sp|O95573|ACSL3_HUMAN Long-chain-fatty-acid--CoA ligase 3 OS=Homo sapiens OX=9606 GN=ACSL3 PE=1 SV=3
23.0887	23.9375	23.3155	22.5643	19.9543	23.8949	22.1356	23.6972	23.5283	21.2598	23.2538	22.6685	21.7733	22.2152	22.1895	NaN	21.5654	21.5151	22.0946	21.2001	22.4668	24.1448	22.8983	23.0538				7	7	5	22.9	22.9	15.5	48.053	0	15.228	179710000	43	sp|O95718|ERR2_HUMAN;sp|O95718-2|ERR2_HUMAN;sp|O95718-1|ERR2_HUMAN;sp|P11474-2|ERR1_HUMAN;sp|P11474|ERR1_HUMAN	sp|O95718|ERR2_HUMAN;sp|O95718-2|ERR2_HUMAN;sp|O95718-1|ERR2_HUMAN	sp|O95718|ERR2_HUMAN Steroid hormone receptor ERR2 OS=Homo sapiens OX=9606 GN=ESRRB PE=1 SV=3;sp|O95718-2|ERR2_HUMAN Isoform 2 of Steroid hormone receptor ERR2 OS=Homo sapiens OX=9606 GN=ESRRB;sp|O95718-1|ERR2_HUMAN Isoform 1 of Steroid hormone receptor ER
25.889	26.8364	25.438	25.8608	27.0359	26.1205	26.006	25.6658	25.7739	24.7929	25.2188	25.4936	21.0108	25.2136	26.2719	24.4917	23.5134	25.7193	23.9212	25.4327	24.9277	25.7222	24.894	25.2572				8	8	7	20.8	20.8	19.2	61.99	0	16.972	1418400000	125	sp|O95741|CPNE6_HUMAN;sp|O95741-2|CPNE6_HUMAN	sp|O95741|CPNE6_HUMAN;sp|O95741-2|CPNE6_HUMAN	sp|O95741|CPNE6_HUMAN Copine-6 OS=Homo sapiens OX=9606 GN=CPNE6 PE=1 SV=3;sp|O95741-2|CPNE6_HUMAN Isoform 2 of Copine-6 OS=Homo sapiens OX=9606 GN=CPNE6
29.2576	29.2765	28.6634	29.0846	29.3604	29.2565	28.93	29.4498	29.3388	28.7729	28.7867	29.5244	29.1963	29.514	29.4738	29.6339	29.7048	29.4607	29.3312	29.3259	29.2118	29.3438	28.9762	29.4141				18	16	15	31.2	27.7	26	94.511	0	323.31	16490000000	473	sp|O95757|HS74L_HUMAN	sp|O95757|HS74L_HUMAN	sp|O95757|HS74L_HUMAN Heat shock 70 kDa protein 4L OS=Homo sapiens OX=9606 GN=HSPA4L PE=1 SV=3
25.5564	25.5119	25.1965	25.6613	25.5771	26.0859	25.5249	25.5066	25.5621	25.7225	24.8354	25.8354	25.6796	24.8155	26.1323	24.7531	25.4372	24.8315	25.3361	26.1115	25.864	25.3085	25.3828	25.222				4	4	4	71.9	71.9	71.9	10.403	0	21.263	1423600000	93	sp|O95777|LSM8_HUMAN	sp|O95777|LSM8_HUMAN	sp|O95777|LSM8_HUMAN U6 snRNA-associated Sm-like protein LSm8 OS=Homo sapiens OX=9606 GN=LSM8 PE=1 SV=3
30.0861	29.8549	29.4634	29.8063	29.8684	29.7153	29.7912	29.8681	29.7201	29.7153	29.2361	29.9525	29.6325	30.0688	29.8596	30.012	29.9615	29.866	29.515	30.3477	29.5565	29.8766	29.6262	30.036				25	25	20	39.3	39.3	31.8	105.36	0	323.31	25028000000	685	sp|O95782-2|AP2A1_HUMAN;sp|O95782|AP2A1_HUMAN	sp|O95782-2|AP2A1_HUMAN;sp|O95782|AP2A1_HUMAN	sp|O95782-2|AP2A1_HUMAN Isoform B of AP-2 complex subunit alpha-1 OS=Homo sapiens OX=9606 GN=AP2A1;sp|O95782|AP2A1_HUMAN AP-2 complex subunit alpha-1 OS=Homo sapiens OX=9606 GN=AP2A1 PE=1 SV=3
23.9626	23.8422	24.3683	23.0411	23.8371	22.8488	23.4669	24.0907	23.727	23.5144	23.0546	24.6045	23.3754	23.5744	23.0725	24.4415	NaN	23.4473	23.0769	23.9354	23.0896	23.672	23.7471	24.6874				3	3	3	10.3	10.3	10.3	54.933	0	65.792	320100000	44	sp|O95793-2|STAU1_HUMAN;sp|O95793-3|STAU1_HUMAN;sp|O95793|STAU1_HUMAN	sp|O95793-2|STAU1_HUMAN;sp|O95793-3|STAU1_HUMAN;sp|O95793|STAU1_HUMAN	sp|O95793-2|STAU1_HUMAN Isoform Short of Double-stranded RNA-binding protein Staufen homolog 1 OS=Homo sapiens OX=9606 GN=STAU1;sp|O95793-3|STAU1_HUMAN Isoform 3 of Double-stranded RNA-binding protein Staufen homolog 1 OS=Homo sapiens OX=9606 GN=STAU1;sp|O
28.9976	29.8449	28.6163	29.3477	29.459	29.661	28.6362	29.3391	29.0788	29.782	28.9451	29.5924	29.0173	29.4211	29.1767	29.7121	29.0374	29.2084	29.4833	29.5845	28.4354	29.3234	29.2314	29.348				11	11	11	27.1	27.1	27.1	66.294	0	323.31	15925000000	411	sp|O95831-3|AIFM1_HUMAN;sp|O95831|AIFM1_HUMAN;sp|O95831-2|AIFM1_HUMAN;sp|O95831-5|AIFM1_HUMAN;sp|O95831-6|AIFM1_HUMAN;sp|O95831-4|AIFM1_HUMAN	sp|O95831-3|AIFM1_HUMAN;sp|O95831|AIFM1_HUMAN;sp|O95831-2|AIFM1_HUMAN	sp|O95831-3|AIFM1_HUMAN Isoform 3 of Apoptosis-inducing factor 1, mitochondrial OS=Homo sapiens OX=9606 GN=AIFM1;sp|O95831|AIFM1_HUMAN Apoptosis-inducing factor 1, mitochondrial OS=Homo sapiens OX=9606 GN=AIFM1 PE=1 SV=1;sp|O95831-2|AIFM1_HUMAN Isoform 2 o
27.1803	27.6316	26.1874	27.0589	26.7861	27.4839	27.4273	27.6113	27.4932	27.4383	26.1677	27.1255	27.0932	26.412	26.5928	25.5833	27.3815	27.0403	26.9807	27.4684	26.9691	27.8278	27.2188	27.0958				9	9	9	22.6	22.6	22.6	86.47	0	90.941	3623300000	115	sp|O95834-2|EMAL2_HUMAN;sp|O95834-3|EMAL2_HUMAN;sp|O95834|EMAL2_HUMAN	sp|O95834-2|EMAL2_HUMAN;sp|O95834-3|EMAL2_HUMAN;sp|O95834|EMAL2_HUMAN	sp|O95834-2|EMAL2_HUMAN Isoform 2 of Echinoderm microtubule-associated protein-like 2 OS=Homo sapiens OX=9606 GN=EML2;sp|O95834-3|EMAL2_HUMAN Isoform 3 of Echinoderm microtubule-associated protein-like 2 OS=Homo sapiens OX=9606 GN=EML2;sp|O95834|EMAL2_HUMA
23.712	24.1268	24.7159	25.33	25.6159	24.368	24.3744	23.7844	21.5832	24.8743	23.3769	23.503	24.1381	25.3805	25.4118	NaN	24.7421	23.8886	23.35	23.891	25.0989	24.1762	24.8644	24.5021				3	3	3	24.9	24.9	24.9	27.543	0	28.088	499190000	25	sp|O95861-3|BPNT1_HUMAN;sp|O95861|BPNT1_HUMAN;sp|O95861-2|BPNT1_HUMAN;sp|O95861-4|BPNT1_HUMAN	sp|O95861-3|BPNT1_HUMAN;sp|O95861|BPNT1_HUMAN;sp|O95861-2|BPNT1_HUMAN;sp|O95861-4|BPNT1_HUMAN	sp|O95861-3|BPNT1_HUMAN Isoform 3 of 3(2),5-bisphosphate nucleotidase 1 OS=Homo sapiens OX=9606 GN=BPNT1;sp|O95861|BPNT1_HUMAN 3(2),5-bisphosphate nucleotidase 1 OS=Homo sapiens OX=9606 GN=BPNT1 PE=1 SV=1;sp|O95861-2|BPNT1_HUMAN Isoform 2 of 3(2),5
29.9035	29.5294	30.0523	29.8805	29.4348	29.85	29.6741	29.5495	29.8635	29.7579	29.7795	29.5575	29.2754	29.254	29.3916	30.1148	29.744	29.2024	29.2132	29.8978	30.0783	29.1506	29.4381	29.6712				7	7	6	52.3	52.3	49.5	29.644	0	24.465	17672000000	186	sp|O95865|DDAH2_HUMAN	sp|O95865|DDAH2_HUMAN	sp|O95865|DDAH2_HUMAN N(G),N(G)-dimethylarginine dimethylaminohydrolase 2 OS=Homo sapiens OX=9606 GN=DDAH2 PE=1 SV=1
23.6193	24.129	22.0656	NaN	24.3195	23.8788	24.7137	24.8735	23.8161	24.1929	23.0503	24.0844	23.5173	24.2116	23.4358	23.4898	23.4229	23.8868	24.3801	24.909	25.4313	23.604	23.2866	24.3149				4	4	4	10.5	10.5	10.5	59.382	0	9.942	447620000	69	sp|O95870-2|ABHGA_HUMAN;sp|O95870|ABHGA_HUMAN	sp|O95870-2|ABHGA_HUMAN;sp|O95870|ABHGA_HUMAN	sp|O95870-2|ABHGA_HUMAN Isoform 2 of Protein ABHD16A OS=Homo sapiens OX=9606 GN=ABHD16A;sp|O95870|ABHGA_HUMAN Protein ABHD16A OS=Homo sapiens OX=9606 GN=ABHD16A PE=1 SV=3
25.5679	25.0846	25.3493	25.3169	26.2798	26.0898	25.0763	24.7973	24.9655	26.2332	26.4536	26.0086	25.3733	25.9195	27.1981	25.4313	25.2208	24.4348	26.7314	26.4141	25.918	25.0667	25.1411	25.3303				5	5	5	14.8	14.8	14.8	65.596	0	323.31	1409800000	134	sp|O96005-3|CLPT1_HUMAN;sp|O96005-4|CLPT1_HUMAN;sp|O96005|CLPT1_HUMAN	sp|O96005-3|CLPT1_HUMAN;sp|O96005-4|CLPT1_HUMAN;sp|O96005|CLPT1_HUMAN	sp|O96005-3|CLPT1_HUMAN Isoform 2 of Cleft lip and palate transmembrane protein 1 OS=Homo sapiens OX=9606 GN=CLPTM1;sp|O96005-4|CLPT1_HUMAN Isoform 3 of Cleft lip and palate transmembrane protein 1 OS=Homo sapiens OX=9606 GN=CLPTM1;sp|O96005|CLPT1_HUMAN Cl
25.067	25.7408	25.4667	25.5535	26.1934	25.7478	25.021	25.9912	25.7914	25.5323	25.6192	26.3302	26.1717	26.3334	26.998	25.711	26.5879	26.2801	26.3993	26.251	26.6573	25.8354	25.7973	26.284				8	8	8	43.5	43.5	43.5	37.893	0	173.31	1620100000	106	sp|O96008|TOM40_HUMAN;sp|O96008-2|TOM40_HUMAN	sp|O96008|TOM40_HUMAN;sp|O96008-2|TOM40_HUMAN	sp|O96008|TOM40_HUMAN Mitochondrial import receptor subunit TOM40 homolog OS=Homo sapiens OX=9606 GN=TOMM40 PE=1 SV=1;sp|O96008-2|TOM40_HUMAN Isoform 2 of Mitochondrial import receptor subunit TOM40 homolog OS=Homo sapiens OX=9606 GN=TOMM40
27.2027	26.7893	26.7325	27.1394	27.0372	26.7938	27.0252	26.9284	27.1773	26.756	26.6151	27.4744	26.4408	26.5551	26.8251	26.5469	26.791	27.6679	26.724	27.0147	25.8477	26.9382	26.8573	26.7821				8	8	7	32.9	32.9	30.1	47.46	0	105.45	3252200000	133	sp|O96019|ACL6A_HUMAN;sp|O96019-2|ACL6A_HUMAN	sp|O96019|ACL6A_HUMAN;sp|O96019-2|ACL6A_HUMAN	sp|O96019|ACL6A_HUMAN Actin-like protein 6A OS=Homo sapiens OX=9606 GN=ACTL6A PE=1 SV=1;sp|O96019-2|ACL6A_HUMAN Isoform 2 of Actin-like protein 6A OS=Homo sapiens OX=9606 GN=ACTL6A
28.6587	29.3412	28.5358	29.1444	28.7914	28.066	28.6989	29.1734	29.3368	28.6783	28.8055	29.6094	28.7658	29.4534	28.4052	29.7154	28.7475	29.138	29.0143	29.1441	28.3731	29.3061	28.9602	29.4287				11	11	5	41.6	41.6	19.3	46.258	0	257.79	15201000000	268	sp|O97580|SUCB1_PIG	sp|O97580|SUCB1_PIG	sp|O97580|SUCB1_PIG Succinate--CoA ligase [ADP-forming] subunit beta, mitochondrial (Fragment) OS=Sus scrofa OX=9823 GN=SUCLA2 PE=2 SV=1
33.4011	33.6373	33.8174	32.9023	33.6333	33.616	33.2118	33.1647	32.8885	33.6433	33.0751	33.4348	33.241	33.3282	33.7084	33.3525	33.2353	33.8113	33.2265	33.5525	33.1441	33.3003	33.4685	33.5419				12	12	12	51.5	51.5	51.5	36.612	0	323.31	308170000000	2148	sp|P00336|LDHB_PIG;sp|P07195|LDHB_HUMAN	sp|P00336|LDHB_PIG;sp|P07195|LDHB_HUMAN	sp|P00336|LDHB_PIG L-lactate dehydrogenase B chain OS=Sus scrofa OX=9823 GN=LDHB PE=1 SV=3;sp|P07195|LDHB_HUMAN L-lactate dehydrogenase B chain OS=Homo sapiens OX=9606 GN=LDHB PE=1 SV=2
31.8318	32.2912	32.2446	31.9988	31.6694	31.7033	31.6222	31.9856	32.1101	32.3091	31.3507	31.6586	32.0326	31.9376	31.3192	31.3218	31.9748	31.3287	31.7368	31.5285	31.8424	32.3434	32.001	31.9891				11	11	11	54.2	54.2	54.2	36.618	0	323.31	99300000000	703	sp|P00339|LDHA_PIG;sp|P00338-4|LDHA_HUMAN;sp|P00338|LDHA_HUMAN;sp|P00338-3|LDHA_HUMAN;sp|P00338-5|LDHA_HUMAN;sp|P00338-2|LDHA_HUMAN	sp|P00339|LDHA_PIG	sp|P00339|LDHA_PIG L-lactate dehydrogenase A chain OS=Sus scrofa OX=9823 GN=LDHA PE=1 SV=3
32.3341	32.9099	32.6346	33.4676	32.952	33.2326	32.2862	32.7152	33.0539	32.6884	32.7846	32.9583	32.3749	33.0725	32.5057	32.4775	32.4464	32.8403	32.9761	32.3864	32.3892	33.0387	32.9195	32.7175				11	11	11	47	47	47	35.484	0	323.31	188630000000	737	sp|P00346|MDHM_PIG;sp|P40926|MDHM_HUMAN;sp|P40926-2|MDHM_HUMAN	sp|P00346|MDHM_PIG;sp|P40926|MDHM_HUMAN;sp|P40926-2|MDHM_HUMAN	sp|P00346|MDHM_PIG Malate dehydrogenase, mitochondrial OS=Sus scrofa OX=9823 GN=MDH2 PE=1 SV=2;sp|P40926|MDHM_HUMAN Malate dehydrogenase, mitochondrial OS=Homo sapiens OX=9606 GN=MDH2 PE=1 SV=3;sp|P40926-2|MDHM_HUMAN Isoform 2 of Malate dehydrogenase, mito
27.2188	26.6312	26.4776	28.5145	27.6786	27.9982	26.7545	26.4546	26.6857	27.6224	27.5056	27.0741	26.1485	27.6067	27.1443	27.4182	26.7608	26.4515	27.1201	26.562	26.698	26.3555	26.4443	26.7363				6	6	6	40.1	40.1	40.1	34.161	0	80.722	3466100000	201	sp|P00348|HCDH_PIG;sp|Q16836|HCDH_HUMAN;sp|Q16836-3|HCDH_HUMAN;sp|Q16836-2|HCDH_HUMAN	sp|P00348|HCDH_PIG	sp|P00348|HCDH_PIG Hydroxyacyl-coenzyme A dehydrogenase, mitochondrial OS=Sus scrofa OX=9823 GN=HADH PE=1 SV=2
34.6292	34.9001	34.7974	35.2876	34.679	35.199	34.9374	34.9705	35.9467	35.3998	34.7805	34.5987	34.5881	34.9295	35.5508	35.4002	34.9752	34.9635	34.7106	34.6182	35.1262	35.1531	35.1093	35.3017				12	12	9	63.7	63.7	52.9	35.836	0	323.31	1149000000000	2182	sp|P00355|G3P_PIG	sp|P00355|G3P_PIG	sp|P00355|G3P_PIG Glyceraldehyde-3-phosphate dehydrogenase OS=Sus scrofa OX=9823 GN=GAPDH PE=1 SV=4
31.3047	31.233	30.5421	31.2173	31.0528	31.0659	31.2509	31.3732	30.5587	31.3393	30.9241	31.1804	31.1476	31.1394	31.3804	31.9568	31.0734	31.445	31.2318	31.5527	30.9725	31.1531	31.299	31.4965				17	17	17	41.2	41.2	41.2	61.397	0	323.31	71411000000	811	sp|P00367|DHE3_HUMAN;sp|P00367-3|DHE3_HUMAN;sp|P00367-2|DHE3_HUMAN;sp|P49448|DHE4_HUMAN	sp|P00367|DHE3_HUMAN;sp|P00367-3|DHE3_HUMAN;sp|P00367-2|DHE3_HUMAN;sp|P49448|DHE4_HUMAN	sp|P00367|DHE3_HUMAN Glutamate dehydrogenase 1, mitochondrial OS=Homo sapiens OX=9606 GN=GLUD1 PE=1 SV=2;sp|P00367-3|DHE3_HUMAN Isoform 3 of Glutamate dehydrogenase 1, mitochondrial OS=Homo sapiens OX=9606 GN=GLUD1;sp|P00367-2|DHE3_HUMAN Isoform 2 of Gluta
26.3825	24.83	28.3903	26.7439	25.6789	25.3045	26.93	25.4435	24.6995	26.1751	26.4117	25.9117	25.6905	24.5211	25.6739	23.6018	25.3434	25.1539	25.5883	24.5953	27.3828	25.2024	24.7194	24.2828				6	6	6	9.1	9.1	9.1	122.2	0	22.823	1503800000	127	sp|P00450|CERU_HUMAN;CON__ENSEMBL:ENSBTAP00000031900	sp|P00450|CERU_HUMAN	sp|P00450|CERU_HUMAN Ceruloplasmin OS=Homo sapiens OX=9606 GN=CP PE=1 SV=1
27.581	25.3804	26.8768	26.1689	27.222	26.9705	27.7157	26.9727	27.5631	27.3011	26.76	26.4594	27.7168	26.9942	26.2873	27.3338	26.7038	27.0389	26.9434	27.537	26.2101	27.2075	26.8365	27.9983				4	4	4	20.8	20.8	20.8	32.118	0	119.14	5113900000	178	sp|P00491|PNPH_HUMAN	sp|P00491|PNPH_HUMAN	sp|P00491|PNPH_HUMAN Purine nucleoside phosphorylase OS=Homo sapiens OX=9606 GN=PNP PE=1 SV=2
31.0812	30.977	30.5918	31.1481	31.2426	31.2566	30.7595	30.9186	31.1665	31.2311	30.8261	30.9688	31.1916	31.4519	30.8501	31.3494	31.7658	31.4706	31.6359	31.6953	31.005	31.329	31.0329	31.0343				14	14	14	55.9	55.9	55.9	46.474	0	323.31	61410000000	490	sp|P00503|AATC_PIG;sp|P17174|AATC_HUMAN;sp|P17174-2|AATC_HUMAN	sp|P00503|AATC_PIG	sp|P00503|AATC_PIG Aspartate aminotransferase, cytoplasmic OS=Sus scrofa OX=9823 GN=GOT1 PE=1 SV=3
33.0062	33.0042	33.1621	34.5157	33.646	33.127	32.482	32.9324	33.9778	33.0101	33.8763	33.0346	32.8377	33.9454	32.7448	33.5638	33.4768	33.5223	33.721	33.9322	33.0689	33.379	33.5308	33.0639				14	14	10	52.1	52.1	42.1	47.436	0	323.31	256530000000	1252	sp|P00506|AATM_PIG	sp|P00506|AATM_PIG	sp|P00506|AATM_PIG Aspartate aminotransferase, mitochondrial OS=Sus scrofa OX=9823 GN=GOT2 PE=1 SV=2
28.6291	29.1122	28.6059	28.5777	28.6617	28.7495	28.8487	29.134	28.8307	28.8656	28.747	28.7195	29.0871	29.0814	28.6252	28.4039	28.5092	28.5048	28.9694	28.6248	28.8935	29.1226	29.0676	28.7391				8	8	7	52.1	52.1	47.4	21.639	0	166.58	11961000000	267	sp|P00571|KAD1_PIG;sp|P00568|KAD1_HUMAN;sp|Q9Y6K8-2|KAD5_HUMAN	sp|P00571|KAD1_PIG;sp|P00568|KAD1_HUMAN	sp|P00571|KAD1_PIG Adenylate kinase isoenzyme 1 OS=Sus scrofa OX=9823 GN=AK1 PE=1 SV=1;sp|P00568|KAD1_HUMAN Adenylate kinase isoenzyme 1 OS=Homo sapiens OX=9606 GN=AK1 PE=1 SV=3
31.1707	30.8491	29.7357	30.9788	30.4924	30.1371	31.6987	30.014	30.3978	30.6772	30.8131	31.0971	31.0001	30.4204	31.5583	30.7982	30.3681	30.477	30.3208	30.3637	31.0715	30.2007	30.73	30.8732				10	10	10	43.8	43.8	43.8	37.294	0	271.25	54825000000	541	sp|P00795|CATD_PIG;sp|P07339|CATD_HUMAN	sp|P00795|CATD_PIG	sp|P00795|CATD_PIG Cathepsin D OS=Sus scrofa OX=9823 GN=CTSD PE=1 SV=2
30.7788	31.0722	30.1059	30.7222	31.3897	31.3421	30.4404	30.8515	30.5108	30.902	30.4405	30.8498	30.6328	30.9817	30.9305	30.8814	31.0685	31.0324	30.4601	31.2534	30.3498	30.8366	30.6697	30.9911				12	12	6	41.2	41.2	28	51.629	0	189.02	45177000000	994	sp|P00889|CISY_PIG	sp|P00889|CISY_PIG	sp|P00889|CISY_PIG Citrate synthase, mitochondrial OS=Sus scrofa OX=9823 GN=CS PE=1 SV=2
24.9082	22.8654	26.5168	25.4698	23.3213	NaN	24.7947	23.3155	NaN	24.093	24.7939	25.2173	24.2985	23.9652	25.2167	NaN	23.6103	22.2507	23.9474	22.5389	25.5929	22.658	23.4364	23.2409				2	2	2	7.3	7.3	7.3	52.602	0	71.885	421630000	29	sp|P01008|ANT3_HUMAN	sp|P01008|ANT3_HUMAN	sp|P01008|ANT3_HUMAN Antithrombin-III OS=Homo sapiens OX=9606 GN=SERPINC1 PE=1 SV=1
28.143	26.4282	30.0691	28.6413	27.7038	27.014	30.0025	27.399	26.2561	27.6989	29.5464	27.733	28.2342	26.891	28.2155	20.8773	29.2669	27.5185	28.5379	27.6887	31.4645	27.3271	27.1686	26.9431				40	40	40	39.4	39.4	39.4	186.8	0	323.31	8976100000	450	sp|P01025|CO3_PIG;CON__Q2UVX4;sp|P01024|CO3_HUMAN	sp|P01025|CO3_PIG	sp|P01025|CO3_PIG Complement C3 OS=Sus scrofa OX=9823 GN=C3 PE=1 SV=2
26.9121	27.0879	26.4403	26.6338	27.4741	27.5263	26.2149	26.8722	26.6199	27.1299	26.8961	27.8128	27.0729	27.1274	26.9537	27.1795	26.1806	26.9586	26.8411	27.3339	27.1668	26.9422	26.0617	26.7368				6	6	2	54.8	54.8	13.3	21.424	0	247.6	2524600000	154	sp|P01116-2|RASK_HUMAN;sp|P01116|RASK_HUMAN	sp|P01116-2|RASK_HUMAN;sp|P01116|RASK_HUMAN	sp|P01116-2|RASK_HUMAN Isoform 2B of GTPase KRas OS=Homo sapiens OX=9606 GN=KRAS;sp|P01116|RASK_HUMAN GTPase KRas OS=Homo sapiens OX=9606 GN=KRAS PE=1 SV=1
29.9176	28.4946	31.9549	31.1864	29.6579	28.7502	32.2331	28.598	28.2813	30.3096	31.8619	29.5887	30.3676	28.6555	29.6175	28.2934	30.2033	28.7455	29.1323	29.3819	30.1932	28.484	29.5205	28.5481				4	4	4	68.6	68.6	68.6	11.003	0	323.31	37031000000	462	sp|P01846|LAC_PIG	sp|P01846|LAC_PIG	sp|P01846|LAC_PIG Ig lambda chain C region OS=Sus scrofa OX=9823 PE=1 SV=1
34.262	34.7705	34.8176	35.2166	33.1208	33.3901	34.3754	34.3566	34.0886	33.5285	31.9462	33.6131	35.1783	33.7189	33.8644	33.0679	33.5267	33.4284	35.0382	33.6952	33.4317	34.0531	33.9874	34.8472				5	5	5	61.7	61.7	61.7	15.039	0	323.31	586750000000	1030	sp|P01965|HBA_PIG;CON__P01966	sp|P01965|HBA_PIG	sp|P01965|HBA_PIG Hemoglobin subunit alpha OS=Sus scrofa OX=9823 GN=HBA PE=1 SV=1
32.9414	33.571	33.7845	34.0836	32.8628	33.3597	32.6637	33.443	34.5859	32.972	33.2259	33.0552	35.6054	32.8633	34.61	32.4739	33.7642	33.429	34.3262	33.0849	32.8078	32.8686	33.8794	33.9863				7	7	5	58.5	58.5	42.9	16.165	0	323.31	402210000000	1115	sp|P02067|HBB_PIG;sp|P04246|HBT_PIG;sp|P69892|HBG2_HUMAN;sp|P69891|HBG1_HUMAN;sp|P02101|HBE_PIG;sp|P02100|HBE_HUMAN	sp|P02067|HBB_PIG	sp|P02067|HBB_PIG Hemoglobin subunit beta OS=Sus scrofa OX=9823 GN=HBB PE=1 SV=3
36.4999	35.0292	36.3706	36.2793	35.1243	35.0883	36.8626	35.673	35.0804	35.4451	35.973	35.4222	35.463	34.2146	35.7475	34.3048	35.3982	34.1548	35.1483	34.0502	36.4251	34.8299	35.8898	34.7762				23	23	20	53.4	53.4	47	53.667	0	323.31	1353100000000	5306	sp|P02543|VIME_PIG;sp|P08670|VIME_HUMAN	sp|P02543|VIME_PIG;sp|P08670|VIME_HUMAN	sp|P02543|VIME_PIG Vimentin OS=Sus scrofa OX=9823 GN=VIM PE=1 SV=2;sp|P08670|VIME_HUMAN Vimentin OS=Homo sapiens OX=9606 GN=VIM PE=1 SV=4
27.9104	29.0399	27.7988	27.6276	28.8343	28.652	28.0347	29.5729	29.7608	30.1933	27.8851	29.4206	29.5345	28.9695	29.4026	29.3041	30.1888	29.7762	29.5006	29.5001	28.3921	28.1543	28.7507	29.4601				12	10	4	34.4	30.8	12.8	62.071	0	323.31	19210000000	510	sp|P02547|NFL_PIG;sp|P17661|DESM_HUMAN	sp|P02547|NFL_PIG	sp|P02547|NFL_PIG Neurofilament light polypeptide OS=Sus scrofa OX=9823 GN=NEFL PE=1 SV=3
27.0827	24.3413	29.8672	26.2235	22.5881	NaN	27.9462	26.7623	25.7594	NaN	27.4918	26.0171	28.5192	25.9959	28.0049	NaN	26.0511	26.2539	27.0851	26.091	28.6363	24.6113	25.9464	25.3486				2	2	2	9.8	9.8	9.8	49.496	0	40.722	3686700000	34	sp|P02679-2|FIBG_HUMAN;sp|P02679|FIBG_HUMAN	sp|P02679-2|FIBG_HUMAN;sp|P02679|FIBG_HUMAN	sp|P02679-2|FIBG_HUMAN Isoform Gamma-A of Fibrinogen gamma chain OS=Homo sapiens OX=9606 GN=FGG;sp|P02679|FIBG_HUMAN Fibrinogen gamma chain OS=Homo sapiens OX=9606 GN=FGG PE=1 SV=3
23.6158	NaN	21.1576	25.4077	24.5822	23.9215	22.4389	22.2297	24.2831	NaN	23.7971	23.5957	23.6461	24.0093	22.9403	24.2977	22.8436	NaN	24.785	23.3445	23.6921	23.426	24.3732	23.904				2	2	2	10.1	10.1	10.1	39.135	0.00035663	4.9235	282370000	27	sp|P03999|OPSB_HUMAN	sp|P03999|OPSB_HUMAN	sp|P03999|OPSB_HUMAN Short-wave-sensitive opsin 1 OS=Homo sapiens OX=9606 GN=OPN1SW PE=1 SV=1
23.4384	23.864	21.9541	25.0063	22.9455	23.0511	23.5761	23.1809	23.4347	23.5174	23.0958	22.555	23.4024	22.279	23.9589	NaN	23.4029	22.3908	22.7178	22.8899	24.2539	23.3828	23.19	22.8894				2	2	2	4.7	4.7	4.7	53.688	0	8.2282	410250000	37	sp|P04066|FUCO_HUMAN	sp|P04066|FUCO_HUMAN	sp|P04066|FUCO_HUMAN Tissue alpha-L-fucosidase OS=Homo sapiens OX=9606 GN=FUCA1 PE=1 SV=4
29.6538	29.5143	30.4617	30.7373	30.0401	29.8961	29.9417	30.2663	32.0045	30.5328	29.9575	29.7926	30.3744	30.4996	29.9304	30.451	29.9028	30.6284	30.3449	30.5539	30.4798	30.7797	30.8504	30.7165				9	7	7	39	31.3	31.3	39.42	0	240.03	37365000000	164	sp|P04075|ALDOA_HUMAN;sp|P04075-2|ALDOA_HUMAN	sp|P04075|ALDOA_HUMAN;sp|P04075-2|ALDOA_HUMAN	sp|P04075|ALDOA_HUMAN Fructose-bisphosphate aldolase A OS=Homo sapiens OX=9606 GN=ALDOA PE=1 SV=2;sp|P04075-2|ALDOA_HUMAN Isoform 2 of Fructose-bisphosphate aldolase A OS=Homo sapiens OX=9606 GN=ALDOA
26.0657	26.0738	25.6331	25.3357	25.8848	25.7826	26.094	25.6194	26.1539	26.0918	26.2261	26.4253	25.8344	25.9168	26.1326	26.1885	26.3222	26.4126	25.6327	25.9834	26.0727	25.6817	26.0802	25.8063				8	8	8	21.8	21.8	21.8	76.832	0	123.79	1575000000	155	sp|P04175|NCPR_PIG;sp|P16435|NCPR_HUMAN	sp|P04175|NCPR_PIG;sp|P16435|NCPR_HUMAN	sp|P04175|NCPR_PIG NADPH--cytochrome P450 reductase OS=Sus scrofa OX=9823 GN=POR PE=1 SV=2;sp|P16435|NCPR_HUMAN NADPH--cytochrome P450 reductase OS=Homo sapiens OX=9606 GN=POR PE=1 SV=2
30.1746	30.2885	31.0721	29.5257	30.038	30.1659	30.1628	30.8358	30.1111	29.1225	30.5299	30.0333	28.6972	30.277	29.6045	29.2744	29.3459	29.0219	29.2452	29.0843	30.2308	29.9691	29.7205	30.4292				5	5	5	60.8	60.8	60.8	15.892	0	216.42	28847000000	593	sp|P04178|SODC_PIG	sp|P04178|SODC_PIG	sp|P04178|SODC_PIG Superoxide dismutase [Cu-Zn] OS=Sus scrofa OX=9823 GN=SOD1 PE=1 SV=2
28.1842	28.6164	26.1386	25.8193	27.4846	28.0658	27.8813	28.3137	29.8424	28.4538	27.4675	28.2437	27.7593	28.6286	27.0288	28.7592	27.65	28.2871	28.2415	27.8817	27.5643	27.9997	28.5967	28.3324				2	2	2	14.9	14.9	14.9	17.935	0	133.91	6764000000	69	sp|P04216|THY1_HUMAN	sp|P04216|THY1_HUMAN	sp|P04216|THY1_HUMAN Thy-1 membrane glycoprotein OS=Homo sapiens OX=9606 GN=THY1 PE=1 SV=2
28.6369	29.3121	29.1518	28.9826	29.2749	29.0137	28.8604	29.4982	29.3373	29.8492	29.2878	28.7152	28.9057	29.681	28.4547	29.6239	29.7026	30.1747	29.5326	29.6044	28.9234	29.506	28.9929	29.1855				19	3	2	68.5	11.5	7.4	49.585	0	323.31	14707000000	168	sp|P04350|TBB4A_HUMAN	sp|P04350|TBB4A_HUMAN	sp|P04350|TBB4A_HUMAN Tubulin beta-4A chain OS=Homo sapiens OX=9606 GN=TUBB4A PE=1 SV=2
23.8749	24.8492	25.1127	22.9053	25.2473	24.1781	22.4375	23.8616	24.9206	24.3693	21.2945	24.7845	23.0243	24.235	24.8719	23.8573	23.7371	25.7493	23.1718	24.6639	24.0441	24.2034	23.101	24.0741				5	2	2	24.2	11.9	11.9	31.548	0	23.799	873860000	105	sp|P04406-2|G3P_HUMAN;sp|P04406|G3P_HUMAN	sp|P04406-2|G3P_HUMAN;sp|P04406|G3P_HUMAN	sp|P04406-2|G3P_HUMAN Isoform 2 of Glyceraldehyde-3-phosphate dehydrogenase OS=Homo sapiens OX=9606 GN=GAPDH;sp|P04406|G3P_HUMAN Glyceraldehyde-3-phosphate dehydrogenase OS=Homo sapiens OX=9606 GN=GAPDH PE=1 SV=3
27.8086	26.5291	26.9941	26.7037	26.3866	27.0154	27.2688	26.8517	26.7613	27.6863	26.8454	25.9693	26.676	26.6172	26.723	25.7303	26.2916	27.276	26.8627	26.9846	27.5665	26.4734	26.5265	26.4144				8	8	8	68	68	68	28.068	0	308.1	2799900000	293	sp|P04574|CPNS1_PIG;sp|P04632|CPNS1_HUMAN;sp|Q96L46|CPNS2_HUMAN	sp|P04574|CPNS1_PIG;sp|P04632|CPNS1_HUMAN	sp|P04574|CPNS1_PIG Calpain small subunit 1 OS=Sus scrofa OX=9823 GN=CAPNS1 PE=1 SV=1;sp|P04632|CPNS1_HUMAN Calpain small subunit 1 OS=Homo sapiens OX=9606 GN=CAPNS1 PE=1 SV=1
29.2794	28.7934	29.7746	29.4886	29.3496	28.6731	29.256	28.6689	29.3718	28.9041	29.0366	29.1705	28.5971	28.7152	29.435	29.1638	29.7516	28.4756	28.9364	29.0218	29.7432	28.7419	28.7742	28.6946				9	6	5	36.9	26.8	22.5	40.45	0	323.31	13108000000	726	sp|P04899|GNAI2_HUMAN;sp|P04899-6|GNAI2_HUMAN;sp|P04899-3|GNAI2_HUMAN;sp|P04899-5|GNAI2_HUMAN;sp|P04899-2|GNAI2_HUMAN;sp|P04899-4|GNAI2_HUMAN	sp|P04899|GNAI2_HUMAN;sp|P04899-6|GNAI2_HUMAN;sp|P04899-3|GNAI2_HUMAN;sp|P04899-5|GNAI2_HUMAN;sp|P04899-2|GNAI2_HUMAN;sp|P04899-4|GNAI2_HUMAN	sp|P04899|GNAI2_HUMAN Guanine nucleotide-binding protein G(i) subunit alpha-2 OS=Homo sapiens OX=9606 GN=GNAI2 PE=1 SV=3;sp|P04899-6|GNAI2_HUMAN Isoform 6 of Guanine nucleotide-binding protein G(i) subunit alpha-2 OS=Homo sapiens OX=9606 GN=GNAI2;sp|P04899
29.4816	29.9716	28.5285	29.0557	30.4675	29.9432	29.5777	29.4983	29.1326	30.2849	29.6786	30.4455	29.7457	29.95	29.6199	30.2568	29.1668	29.9461	29.6104	30.7705	29.4793	29.5609	29.0557	29.7422				6	6	6	27.7	27.7	27.7	35.158	0	230.52	24164000000	250	sp|P05027|AT1B1_PIG	sp|P05027|AT1B1_PIG	sp|P05027|AT1B1_PIG Sodium/potassium-transporting ATPase subunit beta-1 OS=Sus scrofa OX=9823 GN=ATP1B1 PE=1 SV=2
30.5033	30.9435	29.9173	29.4889	30.0707	29.2069	30.0977	30.5497	29.7826	29.5111	29.833	30.1219	30.5003	30.2609	29.8766	31.3936	30.4661	29.8319	30.2336	30.0646	30.0338	30.7603	30.5633	31.0806				11	7	6	34.2	21.8	16.1	32.852	0	323.31	43985000000	806	sp|P05141|ADT2_HUMAN;sp|Q9H0C2|ADT4_HUMAN	sp|P05141|ADT2_HUMAN	sp|P05141|ADT2_HUMAN ADP/ATP translocase 2 OS=Homo sapiens OX=9606 GN=SLC25A5 PE=1 SV=7
23.7211	23.9245	23.6468	23.7823	25.2936	24.6485	24.0954	23.4325	24.2125	23.4646	23.1784	23.8141	23.8378	23.6251	24.1029	24.7955	23.5861	24.9589	24.6349	25.8368	21.7967	24.1577	24.1476	23.8561				3	3	3	7.9	7.9	7.9	75.001	0	6.4905	487160000	66	sp|P05165-3|PCCA_HUMAN;sp|P05165-2|PCCA_HUMAN;sp|P05165|PCCA_HUMAN	sp|P05165-3|PCCA_HUMAN;sp|P05165-2|PCCA_HUMAN;sp|P05165|PCCA_HUMAN	sp|P05165-3|PCCA_HUMAN Isoform 3 of Propionyl-CoA carboxylase alpha chain, mitochondrial OS=Homo sapiens OX=9606 GN=PCCA;sp|P05165-2|PCCA_HUMAN Isoform 2 of Propionyl-CoA carboxylase alpha chain, mitochondrial OS=Homo sapiens OX=9606 GN=PCCA;sp|P05165|PCCA
20.9636	17.9951	22.9347	21.1284	20.0757	21.1423	20.0717	20.0453	21.6915	21.9874	20.7478	20.8182	20.7326	20.8723	20.9949	NaN	20	21.8548	20.9474	20.7881	20.4202	21.0068	21.2017	20.8388				2	2	2	4.7	4.7	4.7	48.908	0.00061881	3.0805	39413000	17	sp|P05186-2|PPBT_HUMAN;sp|P05186-3|PPBT_HUMAN;sp|P05186|PPBT_HUMAN	sp|P05186-2|PPBT_HUMAN;sp|P05186-3|PPBT_HUMAN;sp|P05186|PPBT_HUMAN	sp|P05186-2|PPBT_HUMAN Isoform 2 of Alkaline phosphatase, tissue-nonspecific isozyme OS=Homo sapiens OX=9606 GN=ALPL;sp|P05186-3|PPBT_HUMAN Isoform 3 of Alkaline phosphatase, tissue-nonspecific isozyme OS=Homo sapiens OX=9606 GN=ALPL;sp|P05186|PPBT_HUMAN A
25.4648	24.345	25.5878	25.0212	25.2413	25.2648	25.1486	24.1898	26.1443	25.2997	26.4665	24.3012	24.4927	24.6516	24.4204	24.9583	24.9805	24.76	24.9862	24.633	22.3087	25.0802	25.8517	24.244				6	6	6	23.2	23.2	23.2	36.112	0	29.862	1039900000	81	sp|P05198|IF2A_HUMAN	sp|P05198|IF2A_HUMAN	sp|P05198|IF2A_HUMAN Eukaryotic translation initiation factor 2 subunit 1 OS=Homo sapiens OX=9606 GN=EIF2S1 PE=1 SV=3
26.0666	25.6942	26.2166	25.4768	26.0514	26.448	25.7531	25.6522	25.7753	25.8803	24.8306	25.1324	25.3185	25.79	25.2628	24.8798	25.2964	26.7186	25.678	25.3864	26.3244	25.9547	25.1537	25.4297				7	3	3	41.1	15.7	15.7	39.379	0	181.4	1403300000	80	sp|P22694-4|KAPCB_HUMAN;sp|P22694-3|KAPCB_HUMAN;sp|P22694|KAPCB_HUMAN;sp|P05383|KAPCB_PIG;sp|P22694-5|KAPCB_HUMAN;sp|P22694-7|KAPCB_HUMAN;sp|P22694-6|KAPCB_HUMAN;sp|P22694-9|KAPCB_HUMAN;sp|P22694-2|KAPCB_HUMAN;sp|P22694-10|KAPCB_HUMAN;sp|P22694-8|KAPCB_HUMAN	sp|P22694-4|KAPCB_HUMAN;sp|P22694-3|KAPCB_HUMAN;sp|P22694|KAPCB_HUMAN;sp|P05383|KAPCB_PIG;sp|P22694-5|KAPCB_HUMAN;sp|P22694-7|KAPCB_HUMAN;sp|P22694-6|KAPCB_HUMAN;sp|P22694-9|KAPCB_HUMAN;sp|P22694-2|KAPCB_HUMAN;sp|P22694-10|KAPCB_HUMAN;sp|P22694-8|KAPCB_HUMAN	sp|P22694-4|KAPCB_HUMAN Isoform 4 of cAMP-dependent protein kinase catalytic subunit beta OS=Homo sapiens OX=9606 GN=PRKACB;sp|P22694-3|KAPCB_HUMAN Isoform 3 of cAMP-dependent protein kinase catalytic subunit beta OS=Homo sapiens OX=9606 GN=PRKACB;sp|P2269
29.8869	29.8044	29.7993	30.3988	30.6787	30.0048	29.1577	28.7291	29.3087	30.21	29.527	30.0217	30.0563	29.6437	29.857	26.3368	29.1872	29.99	29.7238	29.6979	29.6877	29.426	29.5076	29.6652				4	3	3	57	42.1	42.1	11.514	0	144.63	16964000000	118	sp|P05386|RLA1_HUMAN	sp|P05386|RLA1_HUMAN	sp|P05386|RLA1_HUMAN 60S acidic ribosomal protein P1 OS=Homo sapiens OX=9606 GN=RPLP1 PE=1 SV=1
29.6139	29.6353	30.5583	30.2385	29.4649	29.8212	30.0453	29.8365	29.4391	29.7913	29.7016	29.1561	29.3591	29.8457	29.9875	29.6606	29.9058	29.2738	29.6517	28.2148	29.782	29.5245	29.6875	29.9608				5	5	3	67.8	67.8	42.6	11.665	0	205.69	20554000000	133	sp|P05387|RLA2_HUMAN;sp|P05386-2|RLA1_HUMAN	sp|P05387|RLA2_HUMAN	sp|P05387|RLA2_HUMAN 60S acidic ribosomal protein P2 OS=Homo sapiens OX=9606 GN=RPLP2 PE=1 SV=1
26.7741	26.76	26.925	25.66	26.5274	26.7981	26.65	25.9886	26.2842	25.5203	26.5238	26.5793	26.255	26.3678	25.8349	24.7953	27.0154	25.7303	24.7658	25.8733	26.6171	26.5967	26.0637	25.8268				2	2	2	7.1	7.1	7.1	46.836	0.00036483	5.4191	2295400000	99	sp|P05455|LA_HUMAN	sp|P05455|LA_HUMAN	sp|P05455|LA_HUMAN Lupus La protein OS=Homo sapiens OX=9606 GN=SSB PE=1 SV=2
28.2208	28.0693	27.4342	27.9229	28.0274	28.0801	27.9071	28.2604	28.3312	28.3474	27.903	28.205	27.8108	27.5608	28.8307	28.0388	28.0952	27.8525	27.9054	27.8989	27.8008	28.0275	27.3492	27.8388				8	7	7	44.8	40.6	40.6	30.025	0	323.31	7518400000	133	sp|P05937|CALB1_HUMAN;sp|P05937-2|CALB1_HUMAN	sp|P05937|CALB1_HUMAN;sp|P05937-2|CALB1_HUMAN	sp|P05937|CALB1_HUMAN Calbindin OS=Homo sapiens OX=9606 GN=CALB1 PE=1 SV=2;sp|P05937-2|CALB1_HUMAN Isoform 2 of Calbindin OS=Homo sapiens OX=9606 GN=CALB1
25.839	25.2636	25.1444	24.5709	25.2397	24.825	25.5846	24.9719	24.322	25.5729	24.5507	25.2065	24.9851	25.5469	25.3225	24.9161	24.907	25.1474	24.9108	25.8464	25.1703	24.7081	25.2172	25.4032				5	5	5	18.5	18.5	18.5	40.786	0	25.502	1519200000	133	sp|P06132|DCUP_HUMAN	sp|P06132|DCUP_HUMAN	sp|P06132|DCUP_HUMAN Uroporphyrinogen decarboxylase OS=Homo sapiens OX=9606 GN=UROD PE=1 SV=2
28.9389	28.9776	28.8637	27.3065	27.7645	27.2538	28.5934	29.0644	28.7793	27.9479	28.1692	27.9188	28.4855	27.3933	27.566	25.932	27.9643	28.1188	28.8939	27.5495	28.6928	28.5953	29.2076	29.2525				2	2	2	15.5	15.5	15.5	12.074	0	210.48	9627400000	93	sp|P06454-2|PTMA_HUMAN;sp|P06454|PTMA_HUMAN	sp|P06454-2|PTMA_HUMAN;sp|P06454|PTMA_HUMAN	sp|P06454-2|PTMA_HUMAN Isoform 2 of Prothymosin alpha OS=Homo sapiens OX=9606 GN=PTMA;sp|P06454|PTMA_HUMAN Prothymosin alpha OS=Homo sapiens OX=9606 GN=PTMA PE=1 SV=2
33.6881	34.1647	33.7153	34.1972	34.3882	34.1805	33.2787	33.9857	34.2194	34.5054	33.8694	34.3415	33.8941	34.2649	34.0137	33.9478	34.0921	34.0772	34.0827	34.1783	33.3594	34.093	34.088	34.1346				24	24	24	65.4	65.4	65.4	56.559	0	323.31	463310000000	3379	sp|P06576|ATPB_HUMAN	sp|P06576|ATPB_HUMAN	sp|P06576|ATPB_HUMAN ATP synthase subunit beta, mitochondrial OS=Homo sapiens OX=9606 GN=ATP5F1B PE=1 SV=3
26.5497	25.2644	24.8353	26.3595	25.8088	25.8341	24.8217	24.6976	24.2358	25.6037	25.1936	26.3434	25.9831	25.9522	25.9982	NaN	25.475	26.6211	NaN	26.768	25.8708	25.2556	25.9439	26.1549				5	5	5	39.6	39.6	39.6	25.097	0	109.24	1077200000	74	sp|P06730|IF4E_HUMAN;sp|P06730-3|IF4E_HUMAN;sp|P06730-2|IF4E_HUMAN	sp|P06730|IF4E_HUMAN;sp|P06730-3|IF4E_HUMAN;sp|P06730-2|IF4E_HUMAN	sp|P06730|IF4E_HUMAN Eukaryotic translation initiation factor 4E OS=Homo sapiens OX=9606 GN=EIF4E PE=1 SV=2;sp|P06730-3|IF4E_HUMAN Isoform 3 of Eukaryotic translation initiation factor 4E OS=Homo sapiens OX=9606 GN=EIF4E;sp|P06730-2|IF4E_HUMAN Isoform 2 of
34.9054	34.4378	34.099	33.6024	31.6921	33.8937	34.5593	34.2732	34.3052	33.6728	34.5849	33.9774	34.5213	34.099	35.1673	28.8237	32.4721	33.3527	31.2651	34.9868	34.5147	33.6818	34.7769	34.9513				12	8	7	35.7	21.7	20	47.168	0	323.31	550330000000	816	sp|P06733|ENOA_HUMAN;sp|P06733-2|ENOA_HUMAN	sp|P06733|ENOA_HUMAN;sp|P06733-2|ENOA_HUMAN	sp|P06733|ENOA_HUMAN Alpha-enolase OS=Homo sapiens OX=9606 GN=ENO1 PE=1 SV=2;sp|P06733-2|ENOA_HUMAN Isoform MBP-1 of Alpha-enolase OS=Homo sapiens OX=9606 GN=ENO1
29.1501	28.3259	29.1563	28.4591	28.5393	28.1547	29.2983	28.7867	29.1037	28.6446	28.7126	28.6595	28.6282	28.1847	28.7379	29.1981	29.3454	29.054	29.1859	28.6424	29.0546	28.7823	29.0755	29.0549				13	10	10	21	15.9	15.9	93.133	0	323.31	12299000000	329	sp|P06737-2|PYGL_HUMAN;sp|P06737|PYGL_HUMAN	sp|P06737-2|PYGL_HUMAN;sp|P06737|PYGL_HUMAN	sp|P06737-2|PYGL_HUMAN Isoform 2 of Glycogen phosphorylase, liver form OS=Homo sapiens OX=9606 GN=PYGL;sp|P06737|PYGL_HUMAN Glycogen phosphorylase, liver form OS=Homo sapiens OX=9606 GN=PYGL PE=1 SV=4
28.7884	28.4935	28.0113	29.2509	29.4811	28.5156	28.4943	28.4052	28.6148	28.7346	28.5804	29.3672	28.615	28.4419	29.1323	29.4323	28.0971	28.4444	28.6453	29.0126	28.4499	28.3592	28.2022	28.6442				5	5	5	32.8	32.8	32.8	29.464	0	323.31	14690000000	489	sp|P06748-2|NPM_HUMAN;sp|P06748|NPM_HUMAN;sp|P06748-3|NPM_HUMAN	sp|P06748-2|NPM_HUMAN;sp|P06748|NPM_HUMAN;sp|P06748-3|NPM_HUMAN	sp|P06748-2|NPM_HUMAN Isoform 2 of Nucleophosmin OS=Homo sapiens OX=9606 GN=NPM1;sp|P06748|NPM_HUMAN Nucleophosmin OS=Homo sapiens OX=9606 GN=NPM1 PE=1 SV=2;sp|P06748-3|NPM_HUMAN Isoform 3 of Nucleophosmin OS=Homo sapiens OX=9606 GN=NPM1
26.3886	26.7932	26.4615	26.1553	26.8845	26.7075	25.8641	26.8723	25.7987	27.1769	26.9439	26.6714	26.7628	26.7502	26.5882	26.7651	26.4927	26.6165	26.2658	25.8251	26.7391	26.3949	26.411	26.3827				10	10	10	16.8	16.8	16.8	111.13	0	201.14	2539400000	188	sp|P06756-3|ITAV_HUMAN;sp|P06756|ITAV_HUMAN;sp|P06756-2|ITAV_HUMAN	sp|P06756-3|ITAV_HUMAN;sp|P06756|ITAV_HUMAN;sp|P06756-2|ITAV_HUMAN	sp|P06756-3|ITAV_HUMAN Isoform 3 of Integrin alpha-V OS=Homo sapiens OX=9606 GN=ITGAV;sp|P06756|ITAV_HUMAN Integrin alpha-V OS=Homo sapiens OX=9606 GN=ITGAV PE=1 SV=2;sp|P06756-2|ITAV_HUMAN Isoform 2 of Integrin alpha-V OS=Homo sapiens OX=9606 GN=ITGAV
27.0041	28.8348	26.6636	25.4464	27.8808	27.0782	27.543	29.0839	28.4758	29.2447	27.22	27.5795	27.7376	27.3767	27.994	27.929	28.0728	27.6025	28.2976	27.81	26.4451	27.6877	27.2033	29.13				12	4	4	31.9	9.9	9.9	61.516	0	120.23	7716600000	306	sp|P07196|NFL_HUMAN	sp|P07196|NFL_HUMAN	sp|P07196|NFL_HUMAN Neurofilament light polypeptide OS=Homo sapiens OX=9606 GN=NEFL PE=1 SV=3
28.1123	30.3116	27.2565	27.4567	28.9346	29.9064	29.0259	30.8095	30.4789	30.3225	27.9244	31.331	29.877	29.6352	29.8543	30.9271	30.552	29.94	30.5421	29.4658	29.0055	29.7435	29.4698	30.8276				13	12	4	19	18	6.3	102.47	0	323.31	25624000000	295	sp|P07197|NFM_HUMAN;sp|P07197-2|NFM_HUMAN	sp|P07197|NFM_HUMAN	sp|P07197|NFM_HUMAN Neurofilament medium polypeptide OS=Homo sapiens OX=9606 GN=NEFM PE=1 SV=3
29.5364	29.5281	29.8634	29.7748	28.9001	28.4147	29.8101	30.2207	29.8599	28.6164	29.6276	29.2158	29.4606	29.3709	28.6504	29.2012	29.1589	29.1353	29.6597	29.2407	29.6958	29.7555	29.5896	29.5952				7	7	7	16.1	16.1	16.1	57.116	0	303.68	18362000000	199	sp|P07237|PDIA1_HUMAN	sp|P07237|PDIA1_HUMAN	sp|P07237|PDIA1_HUMAN Protein disulfide-isomerase OS=Homo sapiens OX=9606 GN=P4HB PE=1 SV=3
31.5851	31.2433	32.5751	32.5136	32.229	31.8742	31.77	31.9391	32.0444	31.9692	31.9162	32.1244	31.2818	31.6382	31.766	30.4034	32.0712	31.5407	31.4451	31.7757	32.3012	31.6396	31.4365	31.4453				18	3	3	63.7	13.3	13.3	49.67	0	323.31	112920000000	491	sp|Q767L7|TBB5_PIG;sp|P07437|TBB5_HUMAN	sp|Q767L7|TBB5_PIG;sp|P07437|TBB5_HUMAN	sp|Q767L7|TBB5_PIG Tubulin beta chain OS=Sus scrofa OX=9823 GN=TUBB PE=2 SV=1;sp|P07437|TBB5_HUMAN Tubulin beta chain OS=Homo sapiens OX=9606 GN=TUBB PE=1 SV=2
28.358	27.9947	28.4307	25.5957	28.3086	27.1941	28.9229	28.4166	28.1806	26.8037	28.6455	27.8813	27.9387	27.481	27.2063	27.0113	26.877	27.9163	28.3593	27.6621	28.4115	27.4356	29.0622	28.2896				2	2	2	3.8	3.8	3.8	58.112	0	6.0956	7138500000	59	sp|P07602|SAP_HUMAN;sp|P07602-2|SAP_HUMAN;sp|P07602-3|SAP_HUMAN	sp|P07602|SAP_HUMAN;sp|P07602-2|SAP_HUMAN;sp|P07602-3|SAP_HUMAN	sp|P07602|SAP_HUMAN Prosaposin OS=Homo sapiens OX=9606 GN=PSAP PE=1 SV=2;sp|P07602-2|SAP_HUMAN Isoform Sap-mu-6 of Prosaposin OS=Homo sapiens OX=9606 GN=PSAP;sp|P07602-3|SAP_HUMAN Isoform Sap-mu-9 of Prosaposin OS=Homo sapiens OX=9606 GN=PSAP
27.1233	27.1723	26.876	26.3635	27.407	25.6961	26.4473	25.8488	25.7939	25.6985	26.9539	25.9888	25.8451	25.826	26.4225	27.0622	NaN	26.7468	25.949	26.2185	26.0837	26.795	26.4066	26.8097				4	4	4	18.7	18.7	18.7	42.921	0	268.84	1980800000	68	sp|P07802|KAP0_PIG;sp|P10644|KAP0_HUMAN;sp|P10644-2|KAP0_HUMAN	sp|P07802|KAP0_PIG;sp|P10644|KAP0_HUMAN;sp|P10644-2|KAP0_HUMAN	sp|P07802|KAP0_PIG cAMP-dependent protein kinase type I-alpha regulatory subunit OS=Sus scrofa OX=9823 GN=PRKAR1A PE=1 SV=2;sp|P10644|KAP0_HUMAN cAMP-dependent protein kinase type I-alpha regulatory subunit OS=Homo sapiens OX=9606 GN=PRKAR1A PE=1 SV=1;sp|P
26.4585	26.5461	26.6807	26.5925	25.7701	26.0295	26.2719	26.4169	26.2303	26.9861	27.4028	26.6701	26.075	26.5529	26.5129	28.5271	26.8277	26.5214	26.4951	26.995	26.1429	25.8726	26.1424	26.3486				10	10	10	9.7	9.7	9.7	170.59	0	30.628	2149000000	113	sp|P07814|SYEP_HUMAN	sp|P07814|SYEP_HUMAN	sp|P07814|SYEP_HUMAN Bifunctional glutamate/proline--tRNA ligase OS=Homo sapiens OX=9606 GN=EPRS PE=1 SV=5
24.9427	24.6361	24.8143	23.1823	25.4542	24.5694	24.3975	24.4943	23.2823	25.6115	23.0143	27.0114	24.7849	22.8988	25.9584	NaN	22.8499	24.6816	NaN	25.0289	24.7605	24.5643	24.4511	24.35				2	2	2	10.8	10.8	10.8	43.363	0	152.29	478680000	16	sp|P07902|GALT_HUMAN;sp|P07902-2|GALT_HUMAN	sp|P07902|GALT_HUMAN;sp|P07902-2|GALT_HUMAN	sp|P07902|GALT_HUMAN Galactose-1-phosphate uridylyltransferase OS=Homo sapiens OX=9606 GN=GALT PE=1 SV=3;sp|P07902-2|GALT_HUMAN Isoform 2 of Galactose-1-phosphate uridylyltransferase OS=Homo sapiens OX=9606 GN=GALT
28.7771	29.0074	29.1336	29.6681	28.9068	28.1588	29.534	28.8811	29.0162	28.2555	28.873	28.6461	28.63	28.2896	28.8717	28.7902	27.9403	28.2591	28.9012	28.4193	28.7148	27.5794	28.6434	28.5443				7	7	4	26.2	26.2	17.7	28.684	0	109.14	11140000000	125	sp|P07951-3|TPM2_HUMAN;sp|P07951-2|TPM2_HUMAN	sp|P07951-3|TPM2_HUMAN;sp|P07951-2|TPM2_HUMAN	sp|P07951-3|TPM2_HUMAN Isoform 3 of Tropomyosin beta chain OS=Homo sapiens OX=9606 GN=TPM2;sp|P07951-2|TPM2_HUMAN Isoform 2 of Tropomyosin beta chain OS=Homo sapiens OX=9606 GN=TPM2
29.5022	29.2773	28.8424	29.8766	29.4972	29.6761	28.792	29.2106	30.2795	29.708	29.0734	29.1575	29.4116	29.5272	29.7309	29.9023	29.7475	29.2567	29.6392	29.1942	28.4728	29.3499	29.3343	29.85				10	10	3	37.3	37.3	8.8	50.212	0	323.31	18685000000	431	sp|P07954-2|FUMH_HUMAN;sp|P07954|FUMH_HUMAN	sp|P07954-2|FUMH_HUMAN;sp|P07954|FUMH_HUMAN	sp|P07954-2|FUMH_HUMAN Isoform Cytoplasmic of Fumarate hydratase, mitochondrial OS=Homo sapiens OX=9606 GN=FH;sp|P07954|FUMH_HUMAN Fumarate hydratase, mitochondrial OS=Homo sapiens OX=9606 GN=FH PE=1 SV=3
32.527	32.6593	32.6298	32.3859	32.561	32.6809	32.1207	32.8477	32.5996	32.5833	32.2934	32.2565	32.722	32.768	32.1579	32.3513	32.7326	32.4257	32.418	32.5945	32.3134	32.8795	32.8881	32.7729				18	18	7	52.2	52.2	25.3	63.125	0	323.31	166150000000	2097	sp|P08059|G6PI_PIG;sp|P06744|G6PI_HUMAN;sp|P06744-2|G6PI_HUMAN	sp|P08059|G6PI_PIG	sp|P08059|G6PI_PIG Glucose-6-phosphate isomerase OS=Sus scrofa OX=9823 GN=GPI PE=1 SV=3
26.6586	26.9079	28.4192	27.3063	27.8266	28.0789	26.8612	26.5613	27.0644	27.133	27.7541	27.9365	28.593	28.1495	27.9549	28.2206	27.041	27.6915	27.7371	26.1894	28.2488	27.0287	26.8172	26.6637				4	4	4	6.2	6.2	6.2	154.79	0	15.153	3344400000	27	sp|P08069|IGF1R_HUMAN;sp|Q29000|IGF1R_PIG	sp|P08069|IGF1R_HUMAN;sp|Q29000|IGF1R_PIG	sp|P08069|IGF1R_HUMAN Insulin-like growth factor 1 receptor OS=Homo sapiens OX=9606 GN=IGF1R PE=1 SV=1;sp|Q29000|IGF1R_PIG Insulin-like growth factor 1 receptor (Fragments) OS=Sus scrofa OX=9823 GN=IGF1R PE=2 SV=2
24.3191	23.6536	25.3034	24.8212	25.0232	24.308	24.1061	24.0681	23.8867	23.2669	24.6101	24.7276	24.3811	22.9563	24.056	22.5109	NaN	22.5925	23.9605	22.496	24.8952	23.8366	23.4897	22.9262				5	4	4	24.5	22.3	22.3	35.828	0	77.395	374150000	74	sp|P08132|ANXA4_PIG;sp|P09525-2|ANXA4_HUMAN;sp|P09525|ANXA4_HUMAN	sp|P08132|ANXA4_PIG;sp|P09525-2|ANXA4_HUMAN;sp|P09525|ANXA4_HUMAN	sp|P08132|ANXA4_PIG Annexin A4 OS=Sus scrofa OX=9823 GN=ANXA4 PE=1 SV=2;sp|P09525-2|ANXA4_HUMAN Isoform 2 of Annexin A4 OS=Homo sapiens OX=9606 GN=ANXA4;sp|P09525|ANXA4_HUMAN Annexin A4 OS=Homo sapiens OX=9606 GN=ANXA4 PE=1 SV=4
27.5634	29.0848	27.6857	28.2811	27.164	26.9083	28.8163	28.517	27.8576	28.1305	27.629	28.8501	27.9054	28.0681	27.5066	28.0324	27.9353	27.1932	27.816	27.8547	26.8756	27.6129	28.5373	28.4718				10	10	10	15.9	15.9	15.9	72.423	0	107.37	7872700000	237	sp|P08133-2|ANXA6_HUMAN;sp|P08133|ANXA6_HUMAN	sp|P08133-2|ANXA6_HUMAN;sp|P08133|ANXA6_HUMAN	sp|P08133-2|ANXA6_HUMAN Isoform 2 of Annexin A6 OS=Homo sapiens OX=9606 GN=ANXA6;sp|P08133|ANXA6_HUMAN Annexin A6 OS=Homo sapiens OX=9606 GN=ANXA6 PE=1 SV=3
28.5079	28.0336	27.9103	28.5026	27.7876	28.5899	28.4201	28.0279	28.2314	28.3104	28.3407	28.7342	28.1651	28.412	28.7246	28.0403	27.7241	28.8188	27.8863	27.768	28.0441	28.045	27.9878	27.995				6	6	2	54.9	54.9	18.7	22.006	0	301.65	7573900000	202	sp|P08134|RHOC_HUMAN	sp|P08134|RHOC_HUMAN	sp|P08134|RHOC_HUMAN Rho-related GTP-binding protein RhoC OS=Homo sapiens OX=9606 GN=RHOC PE=1 SV=1
26.1112	24.7329	25.725	26.2994	24.9089	26.5072	27.0995	24.6697	26.0908	27.0465	26.1541	25.0811	25.3221	24.6884	26.1605	25.7683	26.2391	26.7176	26.3179	27.7347	25.7448	25.3093	25.2865	25.4616				4	4	4	26.4	26.4	26.4	35.766	0	19.845	1336800000	50	sp|P08138-2|TNR16_HUMAN;sp|P08138|TNR16_HUMAN	sp|P08138-2|TNR16_HUMAN;sp|P08138|TNR16_HUMAN	sp|P08138-2|TNR16_HUMAN Isoform 2 of Tumor necrosis factor receptor superfamily member 16 OS=Homo sapiens OX=9606 GN=NGFR;sp|P08138|TNR16_HUMAN Tumor necrosis factor receptor superfamily member 16 OS=Homo sapiens OX=9606 GN=NGFR PE=1 SV=1
30.1819	30.3424	29.6859	30.6586	30.4244	30.1524	30.1841	30.5904	30.5996	31.0011	30.3334	30.2959	30.2104	30.9461	30.4503	30.5815	30.0002	30.5389	30.431	30.3597	30.2581	30.5785	30.539	30.3112				22	14	14	44.1	26.8	26.8	83.263	0	323.31	40427000000	933	sp|P08238|HS90B_HUMAN;sp|Q58FF7|H90B3_HUMAN;sp|Q58FG1|HS904_HUMAN	sp|P08238|HS90B_HUMAN	sp|P08238|HS90B_HUMAN Heat shock protein HSP 90-beta OS=Homo sapiens OX=9606 GN=HSP90AB1 PE=1 SV=4
24.9353	24.0265	25.604	25.8021	24.858	25.0021	24.9044	23.5867	25.9232	23.966	25.01	24.6176	25.1905	24.7906	25.2755	24.7869	24.8798	25.3716	24.9592	24.8926	24.8907	23.8736	24.9178	23.4322				7	7	7	21.1	21.1	21.1	66.558	0	133.98	587820000	63	sp|P08240-2|SRPRA_HUMAN;sp|P08240|SRPRA_HUMAN	sp|P08240-2|SRPRA_HUMAN;sp|P08240|SRPRA_HUMAN	sp|P08240-2|SRPRA_HUMAN Isoform 2 of Signal recognition particle receptor subunit alpha OS=Homo sapiens OX=9606 GN=SRPRA;sp|P08240|SRPRA_HUMAN Signal recognition particle receptor subunit alpha OS=Homo sapiens OX=9606 GN=SRPRA PE=1 SV=2
27.0716	26.9844	27.1558	27.8786	27.9049	27.389	26.2806	27.4229	28.2669	28.2318	27.7419	27.6202	27.2789	27.0131	27.3693	27.9443	28.8721	28.8153	28.2291	NaN	27.3906	27.4682	27.1974	26.9041				5	5	5	36.9	36.9	36.9	35.422	0	190.47	6297000000	94	sp|P08574|CY1_HUMAN	sp|P08574|CY1_HUMAN	sp|P08574|CY1_HUMAN Cytochrome c1, heme protein, mitochondrial OS=Homo sapiens OX=9606 GN=CYC1 PE=1 SV=3
24.9723	24.4947	24.9537	23.9031	23.2093	23.6518	24.5755	24.0842	25.3298	24.032	24.2766	23.8938	24.4442	24.5207	24.2101	25.3649	23.9316	25.4396	25.1541	26.5174	24.6961	24.4469	24.5414	25.0315				3	2	2	20	16.4	16.4	25.486	0	9.1871	558020000	40	sp|P08579|RU2B_HUMAN	sp|P08579|RU2B_HUMAN	sp|P08579|RU2B_HUMAN U2 small nuclear ribonucleoprotein B OS=Homo sapiens OX=9606 GN=SNRPB2 PE=1 SV=1
26.5086	25.749	25.7231	26.0208	25.8871	25.5387	25.9148	25.5484	24.7131	25.8006	25.4642	25.5983	26.238	25.6343	25.9563	26.0546	27.0037	26.7246	25.864	26.7767	26.0532	25.8472	26.5697	25.686				3	3	3	21.1	21.1	21.1	19.79	0.00035063	4.633	1884100000	51	sp|P08621-3|RU17_HUMAN;sp|P08621-2|RU17_HUMAN;sp|P08621|RU17_HUMAN	sp|P08621-3|RU17_HUMAN;sp|P08621-2|RU17_HUMAN;sp|P08621|RU17_HUMAN	sp|P08621-3|RU17_HUMAN Isoform 3 of U1 small nuclear ribonucleoprotein 70 kDa OS=Homo sapiens OX=9606 GN=SNRNP70;sp|P08621-2|RU17_HUMAN Isoform 2 of U1 small nuclear ribonucleoprotein 70 kDa OS=Homo sapiens OX=9606 GN=SNRNP70;sp|P08621|RU17_HUMAN U1 small
27.8285	27.1657	27.8313	27.9201	27.6389	27.7744	27.5838	27.2635	27.2875	27.7618	27.8291	27.881	26.6589	27.0727	28.0186	27.6144	27.0171	27.7238	27.6762	27.6283	27.5921	26.5146	27.1802	27.4341				4	4	4	41.5	41.5	41.5	15.524	0	194.29	4667100000	139	sp|Q6QAP7|RS17_PIG;sp|P08708|RS17_HUMAN	sp|Q6QAP7|RS17_PIG;sp|P08708|RS17_HUMAN	sp|Q6QAP7|RS17_PIG 40S ribosomal protein S17 OS=Sus scrofa OX=9823 GN=RPS17 PE=1 SV=3;sp|P08708|RS17_HUMAN 40S ribosomal protein S17 OS=Homo sapiens OX=9606 GN=RPS17 PE=1 SV=2
23.9729	23.324	23.474	23.6489	24.0051	23.9412	22.8326	24.1632	23.3807	24.2878	24.6497	24.5874	23.858	24.5771	24.0699	22.6287	24.2319	24.4777	23.6262	24.6678	24.2629	23.7654	24.0415	23.5687				6	3	3	30.8	20.1	20.1	40.532	0	104.89	365680000	86	sp|P08754|GNAI3_HUMAN	sp|P08754|GNAI3_HUMAN	sp|P08754|GNAI3_HUMAN Guanine nucleotide-binding protein G(k) subunit alpha OS=Homo sapiens OX=9606 GN=GNAI3 PE=1 SV=3
31.0231	30.107	31.5467	30.9354	30.3864	30.5389	31.6681	30.3677	30.128	30.8062	31.1673	31.069	30.7679	29.677	30.8895	29.039	30.1427	29.9775	30.1017	29.7669	31.5031	29.7417	30.6295	29.9361				13	13	12	46.6	46.6	46.6	35.936	0	323.31	40008000000	595	sp|P08758|ANXA5_HUMAN	sp|P08758|ANXA5_HUMAN	sp|P08758|ANXA5_HUMAN Annexin A5 OS=Homo sapiens OX=9606 GN=ANXA5 PE=1 SV=2
33.6182	32.3751	35.398	34.4742	32.9115	32.6567	34.4875	33.3225	32.7946	33.2062	34.2609	33.4815	33.2508	31.4141	32.8607	32.0613	34.1112	32.2161	32.8726	31.9003	34.8131	31.6971	32.7136	32.7356				26	26	26	44	44	44	69.691	0	323.31	265200000000	1352	sp|P08835|ALBU_PIG;CON__P02769	sp|P08835|ALBU_PIG	sp|P08835|ALBU_PIG Serum albumin OS=Sus scrofa OX=9823 GN=ALB PE=1 SV=2
29.558	29.6242	29.3616	29.3537	29.2531	29.1721	29.4611	29.3528	29.5828	29.4906	28.7356	30.0387	29.8867	29.4349	29.5977	29.7528	29.8709	29.7589	29.4158	29.4904	28.6993	29.3461	29.4505	29.6638				12	12	12	54.2	54.2	54.2	32.928	0	323.31	20341000000	390	sp|Q4GWZ2|RSSA_PIG;sp|P08865|RSSA_HUMAN	sp|Q4GWZ2|RSSA_PIG;sp|P08865|RSSA_HUMAN	sp|Q4GWZ2|RSSA_PIG 40S ribosomal protein SA OS=Sus scrofa OX=9823 GN=RPSA PE=1 SV=3;sp|P08865|RSSA_HUMAN 40S ribosomal protein SA OS=Homo sapiens OX=9606 GN=RPSA PE=1 SV=4
33.3575	33.7896	33.2615	33.9527	34.3774	34.1672	33.42	33.6748	33.8306	33.863	33.6735	34.2279	33.7595	33.9636	33.794	33.9221	33.8502	33.9889	33.6987	33.9886	33.2824	33.9311	33.661	34.0503				13	13	9	56	56	41.9	47.268	0	323.31	472870000000	5965	sp|P09104|ENOG_HUMAN;sp|P09104-2|ENOG_HUMAN	sp|P09104|ENOG_HUMAN;sp|P09104-2|ENOG_HUMAN	sp|P09104|ENOG_HUMAN Gamma-enolase OS=Homo sapiens OX=9606 GN=ENO2 PE=1 SV=3;sp|P09104-2|ENOG_HUMAN Isoform 2 of Gamma-enolase OS=Homo sapiens OX=9606 GN=ENO2
28.4165	28.5389	28.5618	27.7974	28.3487	29.9643	28.2015	28.0942	27.2918	29.5654	29.0784	29.786	28.1006	28.8252	27.962	26.7884	28.574	27.9168	28.4163	27.5756	27.0242	27.9856	27.736	27.5025				3	3	3	14.8	14.8	14.8	34.664	0	47.168	6200600000	51	sp|P09110-2|THIK_HUMAN;sp|P09110|THIK_HUMAN	sp|P09110-2|THIK_HUMAN;sp|P09110|THIK_HUMAN	sp|P09110-2|THIK_HUMAN Isoform 2 of 3-ketoacyl-CoA thiolase, peroxisomal OS=Homo sapiens OX=9606 GN=ACAA1;sp|P09110|THIK_HUMAN 3-ketoacyl-CoA thiolase, peroxisomal OS=Homo sapiens OX=9606 GN=ACAA1 PE=1 SV=2
26.8675	26.1991	27.1083	27.1192	25.8379	25.917	26.3716	26.4883	26.7696	25.3949	26.1344	25.7883	26.7424	25.7049	25.9505	26.8799	NaN	27.0128	25.803	NaN	27.1398	26.48	26.3117	26.0406				2	2	2	18.9	18.9	18.9	17.394	0	10.157	2003400000	35	sp|P09234|RU1C_HUMAN	sp|P09234|RU1C_HUMAN	sp|P09234|RU1C_HUMAN U1 small nuclear ribonucleoprotein C OS=Homo sapiens OX=9606 GN=SNRPC PE=1 SV=1
29.7328	29.7955	29.8556	29.903	29.4174	29.3378	29.2222	29.7012	29.4839	28.707	28.209	29.1875	29.1834	28.8683	28.7914	29.8479	29.6498	29.6523	28.9748	29.5601	29.4397	29.2826	29.7	29.8807				3	3	3	19.1	19.1	19.1	24.917	0	256.43	17077000000	99	sp|P12682|HMGB1_PIG;sp|P09429|HMGB1_HUMAN;sp|P26583|HMGB2_HUMAN;sp|P17741|HMGB2_PIG;sp|B2RPK0|HGB1A_HUMAN	sp|P12682|HMGB1_PIG;sp|P09429|HMGB1_HUMAN	sp|P12682|HMGB1_PIG High mobility group protein B1 OS=Sus scrofa OX=9823 GN=HMGB1 PE=2 SV=3;sp|P09429|HMGB1_HUMAN High mobility group protein B1 OS=Homo sapiens OX=9606 GN=HMGB1 PE=1 SV=3
27.0902	28.5336	28.5218	27.0385	26.5948	28.1027	27.8911	28.2363	27.9274	27.2855	29.0034	27.2734	27.3473	27.7272	27.7673	25.7019	27.1618	25.1129	27.4379	27.3147	26.6498	27.0034	27.8024	26.3561				3	3	3	27.4	27.4	27.4	15.85	0	12.799	5197400000	93	sp|P09455|RET1_HUMAN;sp|P09455-2|RET1_HUMAN;sp|P09455-3|RET1_HUMAN	sp|P09455|RET1_HUMAN;sp|P09455-2|RET1_HUMAN;sp|P09455-3|RET1_HUMAN	sp|P09455|RET1_HUMAN Retinol-binding protein 1 OS=Homo sapiens OX=9606 GN=RBP1 PE=1 SV=2;sp|P09455-2|RET1_HUMAN Isoform 2 of Retinol-binding protein 1 OS=Homo sapiens OX=9606 GN=RBP1;sp|P09455-3|RET1_HUMAN Isoform 3 of Retinol-binding protein 1 OS=Homo sap
31.3469	31.3897	30.1619	31.2293	30.9841	31.163	31.003	31.0083	31.6158	31.0254	30.7215	31.0137	30.7892	31.1979	31.029	31.2275	31.4223	31.1754	31.2413	31.1631	30.7116	31.0973	31.2546	31.8252				12	12	3	56.2	56.2	16.9	40.05	0	323.31	60238000000	608	sp|P09471|GNAO_HUMAN	sp|P09471|GNAO_HUMAN	sp|P09471|GNAO_HUMAN Guanine nucleotide-binding protein G(o) subunit alpha OS=Homo sapiens OX=9606 GN=GNAO1 PE=1 SV=4
27.6763	27.5664	27.1876	25.304	27.2691	27.7975	28.0094	27.2874	27.1168	25.4584	27.8442	25.2675	27.1016	26.5916	26.8265	26.7064	27.4335	26.8509	27.2718	26.8284	28.0803	27.1362	26.9332	26.3298				2	2	2	16.6	16.6	16.6	21.252	0	251.22	3275000000	67	sp|P09488-2|GSTM1_HUMAN;sp|Q03013-2|GSTM4_HUMAN;sp|Q03013|GSTM4_HUMAN;sp|P09488|GSTM1_HUMAN;sp|Q03013-3|GSTM4_HUMAN;sp|P28161-2|GSTM2_HUMAN;sp|P46439|GSTM5_HUMAN;sp|P28161|GSTM2_HUMAN	sp|P09488-2|GSTM1_HUMAN;sp|Q03013-2|GSTM4_HUMAN;sp|Q03013|GSTM4_HUMAN;sp|P09488|GSTM1_HUMAN;sp|Q03013-3|GSTM4_HUMAN;sp|P28161-2|GSTM2_HUMAN;sp|P46439|GSTM5_HUMAN;sp|P28161|GSTM2_HUMAN	sp|P09488-2|GSTM1_HUMAN Isoform 2 of Glutathione S-transferase Mu 1 OS=Homo sapiens OX=9606 GN=GSTM1;sp|Q03013-2|GSTM4_HUMAN Isoform 2 of Glutathione S-transferase Mu 4 OS=Homo sapiens OX=9606 GN=GSTM4;sp|Q03013|GSTM4_HUMAN Glutathione S-transferase Mu 4 O
31.4699	30.6934	33.2511	31.9221	31.2565	30.8643	31.756	31.0123	31.1889	31.1167	31.5579	31.5163	31.0205	30.1484	31.031	31.0644	31.8447	30.4273	31.6129	30.9114	32.1498	30.6634	31.0001	31.3007				20	20	17	42.7	42.7	36.5	76.967	0	323.31	65064000000	1029	sp|P09571|TRFE_PIG;sp|P02787|TRFE_HUMAN	sp|P09571|TRFE_PIG	sp|P09571|TRFE_PIG Serotransferrin OS=Sus scrofa OX=9823 GN=TF PE=1 SV=2
28.3835	27.77	27.7277	28.841	29.1713	28.7716	27.4857	27.7897	28.4248	28.8258	27.5272	28.6555	28.242	28.5024	28.4948	28.4711	28.6309	29.1446	28.2388	29.5412	28.2021	28.7317	28.2343	28.422				9	9	3	34.6	34.6	16.7	54.185	0	323.31	11246000000	469	sp|P09623|DLDH_PIG	sp|P09623|DLDH_PIG	sp|P09623|DLDH_PIG Dihydrolipoyl dehydrogenase, mitochondrial OS=Sus scrofa OX=9823 GN=DLD PE=1 SV=1
30.0039	30.0686	30.4705	30.2695	29.7449	29.798	30.3847	30.0898	30.7039	30.1421	29.5113	30.0189	29.6756	30.0597	30.1133	29.945	29.8901	29.8496	30.3372	30.0774	30.3641	30.0204	30.3515	29.9974				6	6	6	22.1	22.1	22.1	29.386	0	323.31	33236000000	457	sp|P09651-3|ROA1_HUMAN;sp|Q32P51|RA1L2_HUMAN;sp|P09651-2|ROA1_HUMAN;sp|P09651|ROA1_HUMAN	sp|P09651-3|ROA1_HUMAN;sp|Q32P51|RA1L2_HUMAN;sp|P09651-2|ROA1_HUMAN;sp|P09651|ROA1_HUMAN	sp|P09651-3|ROA1_HUMAN Isoform 2 of Heterogeneous nuclear ribonucleoprotein A1 OS=Homo sapiens OX=9606 GN=HNRNPA1;sp|Q32P51|RA1L2_HUMAN Heterogeneous nuclear ribonucleoprotein A1-like 2 OS=Homo sapiens OX=9606 GN=HNRNPA1L2 PE=2 SV=2;sp|P09651-2|ROA1_HUMAN
27.2415	27.3845	26.8735	26.945	27.9565	28.2739	27.082	26.9068	28.1491	28.004	28.0067	27.9998	27.9079	27.6657	27.442	27.1876	26.31	27.3509	27.5319	27.644	26.7761	27.2347	27.3903	27.5379				7	7	7	42.7	42.7	42.7	28.415	0	323.31	4451100000	162	sp|P09661|RU2A_HUMAN	sp|P09661|RU2A_HUMAN	sp|P09661|RU2A_HUMAN U2 small nuclear ribonucleoprotein A OS=Homo sapiens OX=9606 GN=SNRPA1 PE=1 SV=2
27.9379	28.0597	27.7287	28.0889	27.9226	28.1051	28.009	28.3248	28.2548	28.2555	28.0025	27.8633	28.2672	28.0046	27.7589	27.9704	28.2625	27.7463	27.9952	27.6531	28.0149	27.933	28.3189	28.0577				14	14	14	20.7	20.7	20.7	113.08	0	323.31	6417700000	274	sp|P09874|PARP1_HUMAN	sp|P09874|PARP1_HUMAN	sp|P09874|PARP1_HUMAN Poly [ADP-ribose] polymerase 1 OS=Homo sapiens OX=9606 GN=PARP1 PE=1 SV=4
27.3255	27.4269	28.0736	28.3021	27.02	26.8005	27.6042	26.7854	27.4842	27.2843	26.4389	26.6499	26.5661	27.0196	27.5715	26.8416	27.036	27.1651	26.98	26.8785	28.0066	27.0712	27.1065	27.4126				6	6	6	16.7	16.7	16.7	66.851	0	148.33	3972400000	161	sp|P09960-4|LKHA4_HUMAN;sp|P09960|LKHA4_HUMAN;sp|P09960-3|LKHA4_HUMAN;sp|P09960-2|LKHA4_HUMAN	sp|P09960-4|LKHA4_HUMAN;sp|P09960|LKHA4_HUMAN;sp|P09960-3|LKHA4_HUMAN;sp|P09960-2|LKHA4_HUMAN	sp|P09960-4|LKHA4_HUMAN Isoform 4 of Leukotriene A-4 hydrolase OS=Homo sapiens OX=9606 GN=LTA4H;sp|P09960|LKHA4_HUMAN Leukotriene A-4 hydrolase OS=Homo sapiens OX=9606 GN=LTA4H PE=1 SV=2;sp|P09960-3|LKHA4_HUMAN Isoform 3 of Leukotriene A-4 hydrolase OS=Hom
32.3441	32.7927	32.4294	32.7128	32.8084	32.9534	32.4259	33.012	32.6239	33.1359	32.4158	32.8644	32.7679	32.8138	32.5532	32.9388	32.4399	33.459	33.2997	32.8917	32.9284	32.9389	32.6848	32.642				10	10	8	36.8	36.8	29.1	39.455	0	323.31	214020000000	793	sp|P09972|ALDOC_HUMAN	sp|P09972|ALDOC_HUMAN	sp|P09972|ALDOC_HUMAN Fructose-bisphosphate aldolase C OS=Homo sapiens OX=9606 GN=ALDOC PE=1 SV=2
29.044	30.097	29.5909	30.4824	29.9304	29.2248	30.7413	29.6484	29.8211	30.828	29.7746	28.9025	30.4364	30.2856	29.4577	29.1829	31.0224	28.6532	28.86	28.3955	30.5323	30.4354	29.6628	30.379				3	2	2	42.1	34.2	34.2	12.146	0	242.36	27018000000	82	sp|Q71UI9-2|H2AV_HUMAN;sp|Q71UI9|H2AV_HUMAN;sp|P0C0S5|H2AZ_HUMAN;sp|Q71UI9-4|H2AV_HUMAN;sp|Q71UI9-3|H2AV_HUMAN	sp|Q71UI9-2|H2AV_HUMAN;sp|Q71UI9|H2AV_HUMAN;sp|P0C0S5|H2AZ_HUMAN;sp|Q71UI9-4|H2AV_HUMAN	sp|Q71UI9-2|H2AV_HUMAN Isoform 2 of Histone H2A.V OS=Homo sapiens OX=9606 GN=H2AFV;sp|Q71UI9|H2AV_HUMAN Histone H2A.V OS=Homo sapiens OX=9606 GN=H2AFV PE=1 SV=3;sp|P0C0S5|H2AZ_HUMAN Histone H2A.Z OS=Homo sapiens OX=9606 GN=H2AFZ PE=1 SV=2;sp|Q71UI9-4|H2AV_
24.03	25.2366	25.6644	25.8646	24.2771	24.2827	24.8048	24.3508	NaN	25.9969	25.0205	24.3683	25.2635	24.6918	25.9226	NaN	24.8664	24.63	24.6598	25.6261	NaN	23.8008	24.9207	24.8085				5	5	5	27.2	27.2	27.2	39.827	0	7.6441	680620000	16	sp|P0C5I2|GMPPB_PIG;sp|Q9Y5P6|GMPPB_HUMAN;sp|Q9Y5P6-2|GMPPB_HUMAN	sp|P0C5I2|GMPPB_PIG;sp|Q9Y5P6|GMPPB_HUMAN;sp|Q9Y5P6-2|GMPPB_HUMAN	sp|P0C5I2|GMPPB_PIG Mannose-1-phosphate guanyltransferase beta OS=Sus scrofa OX=9823 GN=GMPPB PE=1 SV=1;sp|Q9Y5P6|GMPPB_HUMAN Mannose-1-phosphate guanyltransferase beta OS=Homo sapiens OX=9606 GN=GMPPB PE=1 SV=2;sp|Q9Y5P6-2|GMPPB_HUMAN Isoform 2 of Mannose
25.2203	25.9305	24.8207	24.5008	25.677	25.8536	25.0738	25.9774	26.1339	26.1175	25.8884	25.8315	25.809	26.0333	25.295	26.2483	25.6323	26.0115	25.9938	25.8387	25.6519	25.7404	25.9454	25.8082				4	4	4	79	79	79	10.775	0	224.38	1255100000	105	sp|P0C8B5|GON7_PIG	sp|P0C8B5|GON7_PIG	sp|P0C8B5|GON7_PIG EKC/KEOPS complex subunit GON7 OS=Sus scrofa OX=9823 GN=GON7 PE=3 SV=1
25.2825	25.9807	25.3053	27.4152	26.4109	26.7259	25.7144	26.0621	27.917	27.6364	26.0877	26.6466	26.3482	26.343	26.0039	26.3387	26.8323	25.8364	26.0607	25.9478	25.6857	25.8779	25.933	25.912				4	4	4	26.7	26.7	26.7	27.872	0	148.98	2171300000	71	sp|Q01081|U2AF1_HUMAN;sp|P0DN76|U2AF5_HUMAN;sp|Q01081-2|U2AF1_HUMAN;sp|Q01081-3|U2AF1_HUMAN;sp|Q29350|U2AF1_PIG;sp|Q8WU68-3|U2AF4_HUMAN;sp|Q8WU68-2|U2AF4_HUMAN;sp|Q8WU68|U2AF4_HUMAN;sp|Q01081-4|U2AF1_HUMAN	sp|Q01081|U2AF1_HUMAN;sp|P0DN76|U2AF5_HUMAN;sp|Q01081-2|U2AF1_HUMAN;sp|Q01081-3|U2AF1_HUMAN;sp|Q29350|U2AF1_PIG;sp|Q8WU68-3|U2AF4_HUMAN;sp|Q8WU68-2|U2AF4_HUMAN;sp|Q8WU68|U2AF4_HUMAN	sp|Q01081|U2AF1_HUMAN Splicing factor U2AF 35 kDa subunit OS=Homo sapiens OX=9606 GN=U2AF1 PE=1 SV=3;sp|P0DN76|U2AF5_HUMAN Splicing factor U2AF 35 kDa subunit-like protein OS=Homo sapiens OX=9606 GN=U2AF1L5 PE=1 SV=1;sp|Q01081-2|U2AF1_HUMAN Isoform 2 of Sp
31.899	31.9915	31.7616	31.2988	31.7634	31.8382	31.4074	31.4818	32.5647	33.1626	31.5187	31.6868	31.5778	32.2154	31.3897	32.0534	32.1226	32.429	31.7857	31.8406	31.2751	31.6754	31.5358	31.4946				7	7	7	70.5	70.5	70.5	16.837	0	323.31	101290000000	991	sp|P0DP25|CALM3_HUMAN;sp|P0DP24|CALM2_HUMAN;sp|P0DP23|CALM1_HUMAN;sp|P27482|CALL3_HUMAN	sp|P0DP25|CALM3_HUMAN;sp|P0DP24|CALM2_HUMAN;sp|P0DP23|CALM1_HUMAN	sp|P0DP25|CALM3_HUMAN Calmodulin-3 OS=Homo sapiens OX=9606 GN=CALM3 PE=1 SV=1;sp|P0DP24|CALM2_HUMAN Calmodulin-2 OS=Homo sapiens OX=9606 GN=CALM2 PE=1 SV=1;sp|P0DP23|CALM1_HUMAN Calmodulin-1 OS=Homo sapiens OX=9606 GN=CALM1 PE=1 SV=1
26.7474	26.2162	27.1434	27.4727	26.9817	27.3521	26.6232	27.356	26.4713	27.6353	27.0714	27.0922	26.3539	26.3701	26.7272	26.5176	26.1719	26.2681	26.58	25.9396	26.5938	26.9997	26.6535	26.9731				5	5	5	14.3	14.3	14.3	60.67	0	141.88	3667900000	264	sp|P10155|RO60_HUMAN;sp|P10155-3|RO60_HUMAN;sp|P10155-5|RO60_HUMAN;sp|P10155-4|RO60_HUMAN;sp|P10155-2|RO60_HUMAN	sp|P10155|RO60_HUMAN;sp|P10155-3|RO60_HUMAN;sp|P10155-5|RO60_HUMAN;sp|P10155-4|RO60_HUMAN	sp|P10155|RO60_HUMAN 60 kDa SS-A/Ro ribonucleoprotein OS=Homo sapiens OX=9606 GN=TROVE2 PE=1 SV=2;sp|P10155-3|RO60_HUMAN Isoform 3 of 60 kDa SS-A/Ro ribonucleoprotein OS=Homo sapiens OX=9606 GN=TROVE2;sp|P10155-5|RO60_HUMAN Isoform 5 of 60 kDa SS-A/Ro ribo
23.7068	23.327	23.5032	22.4195	22.7859	24.6592	22.406	23.7373	24.2451	24.479	22.2646	24.2263	23.8734	22.0334	23.7333	23.6881	NaN	24.2021	23.0692	23.825	22.8604	24.1761	23.1806	23.1432				9	2	2	39.9	11.4	11.4	50.009	0.00035765	4.9836	355280000	38	sp|P10173|FUMH_PIG	sp|P10173|FUMH_PIG	sp|P10173|FUMH_PIG Fumarate hydratase, mitochondrial OS=Sus scrofa OX=9823 GN=FH PE=1 SV=1
28.4485	29.1958	27.7576	27.9984	28.7641	28.7276	28.3358	28.6106	27.7477	28.6918	28.1581	28.7723	28.6514	28.2939	28.561	29.0646	28.6158	28.7014	28.7741	28.06	28.3964	28.8168	28.5542	28.6821				7	7	7	15.3	15.3	15.3	68.996	0	63.399	11911000000	364	sp|P10515|ODP2_HUMAN	sp|P10515|ODP2_HUMAN	sp|P10515|ODP2_HUMAN Dihydrolipoyllysine-residue acetyltransferase component of pyruvate dehydrogenase complex, mitochondrial OS=Homo sapiens OX=9606 GN=DLAT PE=1 SV=3
32.1312	32.169	32.2381	32.5705	32.0868	31.7352	31.9831	32.1311	32.0158	32.432	32.6137	31.8653	31.5472	31.4686	31.8994	31.5618	31.2365	31.0941	32.0232	31.8221	32.4328	32.1798	31.7356	32.243				8	8	2	55.4	55.4	10.2	18.518	0	323.31	108830000000	732	sp|P10668|COF1_PIG	sp|P10668|COF1_PIG	sp|P10668|COF1_PIG Cofilin-1 OS=Sus scrofa OX=9823 GN=CFL1 PE=1 SV=3
28.4444	29.5575	27.1895	28.7552	28.6505	27.5861	27.9456	30.0977	28.684	29.3305	28.2654	28.5972	28.5915	29.0782	27.6655	29.4773	28.2338	28.6579	28.1178	28.5742	28.0654	29.4776	28.9847	29.6068				3	3	3	3.2	3.2	3.2	135.36	0	36.692	17008000000	134	sp|P10745|RET3_HUMAN	sp|P10745|RET3_HUMAN	sp|P10745|RET3_HUMAN Retinol-binding protein 3 OS=Homo sapiens OX=9606 GN=RBP3 PE=1 SV=2
29.4266	28.8491	30.1137	29.0939	29.0108	29.0739	29.2351	28.9582	29.0483	29.6335	29.6725	29.4873	29.3252	28.8574	29.086	29.0621	29.4959	29.5594	29.3861	29.274	29.9323	29.225	29.2207	29.0967				15	15	15	57.9	57.9	57.9	49.023	0	323.31	16244000000	406	sp|P10775|RINI_PIG	sp|P10775|RINI_PIG	sp|P10775|RINI_PIG Ribonuclease inhibitor OS=Sus scrofa OX=9823 GN=RNH1 PE=1 SV=1
30.9859	31.1724	30.4503	31.0295	30.9161	31.0573	30.7176	30.7201	30.9676	31.1793	30.6	30.9826	30.8823	30.9942	30.6812	31.4745	31.1642	31.1851	31.1998	31.1519	30.8194	31.3377	31.1222	31.1584				22	22	22	50.1	50.1	50.1	61.054	0	323.31	55888000000	1352	sp|P10809|CH60_HUMAN;sp|P10809-2|CH60_HUMAN	sp|P10809|CH60_HUMAN	sp|P10809|CH60_HUMAN 60 kDa heat shock protein, mitochondrial OS=Homo sapiens OX=9606 GN=HSPD1 PE=1 SV=2
31.9265	31.5484	32.0689	31.9169	31.2261	31.2713	31.9366	31.6272	31.7398	31.4746	31.6832	31.2448	31.5596	31.5345	31.7958	31.5196	31.6725	31.7124	31.5679	31.4431	31.7913	31.0908	31.6514	31.7049				19	18	18	41.1	41.1	41.1	72.332	0	323.31	84601000000	783	sp|P11021|BIP_HUMAN;sp|P34935|BIP_PIG	sp|P11021|BIP_HUMAN	sp|P11021|BIP_HUMAN Endoplasmic reticulum chaperone BiP OS=Homo sapiens OX=9606 GN=HSPA5 PE=1 SV=2
26.0273	25.359	27.1481	26.2438	25.4082	25.4616	25.9018	25.1794	25.1603	25.9723	25.1607	25.6175	25.3865	25.1854	26.0657	25.9703	26.5031	25.1234	26.1903	25.331	25.7598	25.5862	25.7366	25.2502				11	11	11	10.1	10.1	10.1	177.6	0	46.621	1344200000	71	sp|P11047|LAMC1_HUMAN	sp|P11047|LAMC1_HUMAN	sp|P11047|LAMC1_HUMAN Laminin subunit gamma-1 OS=Homo sapiens OX=9606 GN=LAMC1 PE=1 SV=3
28.7978	28.9184	28.055	28.7726	28.0097	27.6125	28.8301	28.7566	28.7052	28.2796	27.6765	28.1666	28.8815	28.9003	28.4516	28.8369	29.0109	29.3944	29.0492	28.1896	28.0168	28.9496	28.609	28.8649				14	14	14	15	15	15	199.08	0	323.31	11073000000	333	sp|P11137-3|MTAP2_HUMAN;sp|P11137|MTAP2_HUMAN;sp|P11137-2|MTAP2_HUMAN;sp|P11137-4|MTAP2_HUMAN	sp|P11137-3|MTAP2_HUMAN;sp|P11137|MTAP2_HUMAN	sp|P11137-3|MTAP2_HUMAN Isoform 3 of Microtubule-associated protein 2 OS=Homo sapiens OX=9606 GN=MAP2;sp|P11137|MTAP2_HUMAN Microtubule-associated protein 2 OS=Homo sapiens OX=9606 GN=MAP2 PE=1 SV=4
33.4489	33.6179	33.6053	33.8359	33.4178	33.2282	33.279	33.4032	33.3955	33.0469	33.2642	33.3904	33.7376	33.6855	33.4382	33.7613	33.4351	33.7401	33.5848	33.2007	33.2586	33.4766	33.5575	33.5387				25	25	16	62.2	62.2	45.4	70.897	0	323.31	314760000000	3701	sp|P11142|HSP7C_HUMAN;sp|P11142-2|HSP7C_HUMAN	sp|P11142|HSP7C_HUMAN;sp|P11142-2|HSP7C_HUMAN	sp|P11142|HSP7C_HUMAN Heat shock cognate 71 kDa protein OS=Homo sapiens OX=9606 GN=HSPA8 PE=1 SV=1;sp|P11142-2|HSP7C_HUMAN Isoform 2 of Heat shock cognate 71 kDa protein OS=Homo sapiens OX=9606 GN=HSPA8
31.0918	31.3783	30.8769	30.5538	30.8876	30.3968	30.4193	31.0335	30.742	30.6697	30.643	30.8571	31.0192	30.9383	30.3482	31.1562	30.7753	30.4368	30.9491	31.0748	31.0923	31.1909	30.5208	31.3627				8	8	8	22.2	22.2	22.2	54.035	0	167.4	49836000000	427	sp|P20303|GTR1_PIG;sp|P11166|GTR1_HUMAN	sp|P20303|GTR1_PIG;sp|P11166|GTR1_HUMAN	sp|P20303|GTR1_PIG Solute carrier family 2, facilitated glucose transporter member 1 OS=Sus scrofa OX=9823 GN=SLC2A1 PE=2 SV=2;sp|P11166|GTR1_HUMAN Solute carrier family 2, facilitated glucose transporter member 1 OS=Homo sapiens OX=9606 GN=SLC2A1 PE=1 SV=
24.4373	24.8092	24.5882	24.5481	24.2507	NaN	23.9584	24.1197	23.7927	NaN	24.9797	22.2465	24.1289	23.9585	23.7879	NaN	23.2237	23.8717	22.5576	25.9098	NaN	25.0098	23.1222	24.4244				3	3	3	11.1	11.1	11.1	53.924	0	6.7457	611110000	44	sp|P11169|GTR3_HUMAN;sp|Q8TDB8-4|GTR14_HUMAN;sp|Q8TDB8-2|GTR14_HUMAN;sp|Q8TDB8|GTR14_HUMAN;sp|Q8TDB8-5|GTR14_HUMAN	sp|P11169|GTR3_HUMAN	sp|P11169|GTR3_HUMAN Solute carrier family 2, facilitated glucose transporter member 3 OS=Homo sapiens OX=9606 GN=SLC2A3 PE=1 SV=1
25.9706	26.641	25.8245	26.3968	27.2336	27.2371	26.3766	28.2256	26.0822	27.7693	26.5142	27.2057	27.4048	25.9606	27.1288	26.9159	26.1974	27.6065	27.9637	26.1231	25.8188	27.21	26.4662	27.0858				5	5	5	17.3	17.3	17.3	37.514	0	70.861	3951000000	133	sp|P11177-3|ODPB_HUMAN;sp|P11177-2|ODPB_HUMAN;sp|P11177|ODPB_HUMAN	sp|P11177-3|ODPB_HUMAN;sp|P11177-2|ODPB_HUMAN;sp|P11177|ODPB_HUMAN	sp|P11177-3|ODPB_HUMAN Isoform 3 of Pyruvate dehydrogenase E1 component subunit beta, mitochondrial OS=Homo sapiens OX=9606 GN=PDHB;sp|P11177-2|ODPB_HUMAN Isoform 2 of Pyruvate dehydrogenase E1 component subunit beta, mitochondrial OS=Homo sapiens OX=9606
29.7864	29.7834	29.2233	29.2542	29.0772	28.5409	29.6884	29.2995	29.5629	29.4656	28.8653	29.0479	29.4728	29.2861	28.945	29.0876	29.6698	29.1201	29.6281	28.7091	28.4996	29.286	29.4474	29.8602				15	15	11	25.6	25.6	19.6	96.695	0	323.31	18256000000	360	sp|P11216|PYGB_HUMAN	sp|P11216|PYGB_HUMAN	sp|P11216|PYGB_HUMAN Glycogen phosphorylase, brain form OS=Homo sapiens OX=9606 GN=PYGB PE=1 SV=5
26.1155	26.2431	25.5971	26.831	26.265	26.5361	25.779	25.8198	26.0477	26.1963	26.478	26.3689	26.5401	26.9941	26.7132	27.0981	26.3572	26.962	27.0291	25.8425	27.0469	26.4584	26.4262	25.8992				6	6	2	39.3	39.3	13.6	23.408	0	323.31	1798900000	188	sp|P11234|RALB_HUMAN;sp|P11234-2|RALB_HUMAN;sp|P11234-3|RALB_HUMAN	sp|P11234|RALB_HUMAN;sp|P11234-2|RALB_HUMAN;sp|P11234-3|RALB_HUMAN	sp|P11234|RALB_HUMAN Ras-related protein Ral-B OS=Homo sapiens OX=9606 GN=RALB PE=1 SV=1;sp|P11234-2|RALB_HUMAN Isoform 2 of Ras-related protein Ral-B OS=Homo sapiens OX=9606 GN=RALB;sp|P11234-3|RALB_HUMAN Isoform 3 of Ras-related protein Ral-B OS=Homo sap
23.8735	25.2263	24.051	24.5439	24.5243	23.2306	24.335	23.962	24.6741	25.7052	22.426	24.2836	25.1571	24.2603	23.4515	25.177	NaN	23.8823	25.41	24.2735	24.2342	24.3026	23.4991	24.8346				11	9	9	7.3	6.4	6.4	242.8	0	42.62	533970000	95	sp|P11277-3|SPTB1_HUMAN;sp|P11277|SPTB1_HUMAN;sp|P11277-2|SPTB1_HUMAN	sp|P11277-3|SPTB1_HUMAN;sp|P11277|SPTB1_HUMAN;sp|P11277-2|SPTB1_HUMAN	sp|P11277-3|SPTB1_HUMAN Isoform 3 of Spectrin beta chain, erythrocytic OS=Homo sapiens OX=9606 GN=SPTB;sp|P11277|SPTB1_HUMAN Spectrin beta chain, erythrocytic OS=Homo sapiens OX=9606 GN=SPTB PE=1 SV=5;sp|P11277-2|SPTB1_HUMAN Isoform 2 of Spectrin beta chai
27.4812	27.4194	27.922	26.6141	27.0892	26.8332	27.2292	27.2584	26.7659	26.7572	27.1455	27.604	27.795	24.1686	26.756	23.44	26.4225	27.9634	26.6845	26.2276	24.6012	26.8835	26.9864	26.4612				6	6	6	13.8	13.8	13.8	59.256	0	68.542	3069300000	134	sp|P11413|G6PD_HUMAN;sp|P11413-3|G6PD_HUMAN;sp|P11413-2|G6PD_HUMAN	sp|P11413|G6PD_HUMAN;sp|P11413-3|G6PD_HUMAN;sp|P11413-2|G6PD_HUMAN	sp|P11413|G6PD_HUMAN Glucose-6-phosphate 1-dehydrogenase OS=Homo sapiens OX=9606 GN=G6PD PE=1 SV=4;sp|P11413-3|G6PD_HUMAN Isoform 3 of Glucose-6-phosphate 1-dehydrogenase OS=Homo sapiens OX=9606 GN=G6PD;sp|P11413-2|G6PD_HUMAN Isoform Long of Glucose-6-phos
31.2654	31.5472	30.3511	31.7454	31.8751	32.0639	30.8797	32.092	32.7312	31.9809	31.3696	31.872	31.5914	31.575	31.3946	31.8302	32.3783	32.3226	32.3209	31.9819	31.0808	31.8466	32.2695	32.3117				11	10	9	50.3	47.1	43.7	40.04	0	323.31	103550000000	1803	sp|P11488|GNAT1_HUMAN;sp|A8MTJ3|GNAT3_HUMAN	sp|P11488|GNAT1_HUMAN	sp|P11488|GNAT1_HUMAN Guanine nucleotide-binding protein G(t) subunit alpha-1 OS=Homo sapiens OX=9606 GN=GNAT1 PE=1 SV=5
28.4087	28.2062	28.0816	27.7131	28.0718	28.3832	28.4681	28.1939	28.7402	28.3428	27.9234	28.6243	27.8073	28.085	28.2296	27.6792	28.1575	28.2802	28.2181	28.5699	28.0623	28.1075	28.2906	28.4014				17	17	17	25	25	25	129.63	0	323.31	7335000000	270	sp|P11498|PYC_HUMAN;sp|P11498-2|PYC_HUMAN	sp|P11498|PYC_HUMAN	sp|P11498|PYC_HUMAN Pyruvate carboxylase, mitochondrial OS=Homo sapiens OX=9606 GN=PC PE=1 SV=2
27.1461	26.2454	26.9917	27.166	26.5535	26.2356	27.2912	26.0307	26.9416	25.9163	26.5605	26.0547	26.3075	25.6127	26.834	26.8749	24.3414	25.9285	26.6656	26.4363	26.6963	26.1565	25.9968	25.9284				9	9	9	17.1	17.1	17.1	101.56	0	14.571	2259200000	83	sp|P11586|C1TC_HUMAN	sp|P11586|C1TC_HUMAN	sp|P11586|C1TC_HUMAN C-1-tetrahydrofolate synthase, cytoplasmic OS=Homo sapiens OX=9606 GN=MTHFD1 PE=1 SV=3
29.5461	29.1833	29.1042	29.3401	29.4443	29.2282	29.1575	29.1484	29.5122	29.3153	29.3412	29.3669	29.197	29.3693	28.8272	28.9022	28.9168	29.2791	29.1458	29.1292	29.308	29.2865	29.1065	29.3363				23	23	23	37.8	37.8	37.8	109.72	0	323.31	14891000000	657	sp|P11607-2|AT2A2_PIG;sp|P11607|AT2A2_PIG;sp|P16615-5|AT2A2_HUMAN;sp|P16615-2|AT2A2_HUMAN;sp|P16615-3|AT2A2_HUMAN;sp|P16615|AT2A2_HUMAN;sp|P16615-4|AT2A2_HUMAN;sp|O14983-3|AT2A1_HUMAN;sp|O14983-2|AT2A1_HUMAN;sp|O14983|AT2A1_HUMAN;sp|Q93084-4|AT2A3_HUMAN;sp|Q93084-2|AT2A3_HUMAN;sp|Q93084-3|AT2A3_HUMAN;sp|Q93084-7|AT2A3_HUMAN;sp|Q93084|AT2A3_HUMAN;sp|Q93084-6|AT2A3_HUMAN;sp|Q93084-5|AT2A3_HUMAN	sp|P11607-2|AT2A2_PIG;sp|P11607|AT2A2_PIG;sp|P16615-5|AT2A2_HUMAN;sp|P16615-2|AT2A2_HUMAN;sp|P16615-3|AT2A2_HUMAN;sp|P16615|AT2A2_HUMAN;sp|P16615-4|AT2A2_HUMAN	sp|P11607-2|AT2A2_PIG Isoform 2 of Sarcoplasmic/endoplasmic reticulum calcium ATPase 2 OS=Sus scrofa OX=9823 GN=ATP2A2;sp|P11607|AT2A2_PIG Sarcoplasmic/endoplasmic reticulum calcium ATPase 2 OS=Sus scrofa OX=9823 GN=ATP2A2 PE=1 SV=1;sp|P16615-5|AT2A2_HUMAN
31.9731	32.2961	32.1482	32.7438	32.1395	32.1805	31.7586	32.4619	32.2523	32.4855	31.9262	32.4871	32.0195	32.4951	32.5783	32.4285	32.1599	32.5856	32.3838	32.0954	31.9062	32.17	32.0981	32.1427				11	11	11	61.1	61.1	61.1	36.454	0	323.31	130840000000	888	sp|P11708|MDHC_PIG;sp|P40925|MDHC_HUMAN;sp|P40925-3|MDHC_HUMAN;sp|P40925-2|MDHC_HUMAN	sp|P11708|MDHC_PIG	sp|P11708|MDHC_PIG Malate dehydrogenase, cytoplasmic OS=Sus scrofa OX=9823 GN=MDH1 PE=1 SV=4
28.6245	27.8234	26.8417	28.4049	27.5853	27.0013	28.5317	27.9395	25.9831	27.7343	28.8009	27.3362	27.9538	28.055	28.3217	27.4969	28.0567	28.2116	28.041	28.3853	27.4609	28.4607	27.8544	27.8265				3	3	3	12.8	12.8	12.8	39.724	0	14.981	7261100000	89	sp|P11766|ADHX_HUMAN	sp|P11766|ADHX_HUMAN	sp|P11766|ADHX_HUMAN Alcohol dehydrogenase class-3 OS=Homo sapiens OX=9606 GN=ADH5 PE=1 SV=4
28.0373	28.45	28.0088	28.1125	28.1992	28.062	28.1236	28.1913	28.5077	28.7209	28.2532	27.9803	28.1494	28.0836	28.0212	28.1236	27.8224	28.4806	27.996	28.5302	28.0292	28.205	28.1217	28.231				11	11	5	31.4	31.4	16.7	70.67	0	323.31	7271700000	348	sp|P11940|PABP1_HUMAN;sp|P11940-2|PABP1_HUMAN;sp|Q9H361|PABP3_HUMAN;sp|Q4VXU2|PAP1L_HUMAN;sp|Q4VXU2-2|PAP1L_HUMAN	sp|P11940|PABP1_HUMAN;sp|P11940-2|PABP1_HUMAN	sp|P11940|PABP1_HUMAN Polyadenylate-binding protein 1 OS=Homo sapiens OX=9606 GN=PABPC1 PE=1 SV=2;sp|P11940-2|PABP1_HUMAN Isoform 2 of Polyadenylate-binding protein 1 OS=Homo sapiens OX=9606 GN=PABPC1
23.709	22.6974	22.3539	23.4169	24.6234	24.1598	NaN	22.7494	25.0624	24.8938	24.973	24.3498	23.9714	24.0858	24.5599	24.6531	23.6565	23.7603	24.6086	23.6242	22.5495	23.8323	23.235	22.993				3	3	3	24.1	24.1	24.1	28.768	0	15.802	307570000	38	sp|P12004|PCNA_HUMAN	sp|P12004|PCNA_HUMAN	sp|P12004|PCNA_HUMAN Proliferating cell nuclear antigen OS=Homo sapiens OX=9606 GN=PCNA PE=1 SV=1
32.9348	31.6781	32.9768	32.9692	32.834	32.5834	32.5908	32.4725	32.7053	33.0994	32.7291	31.6724	32.5666	32.4425	32.8082	31.6838	33.0021	31.8901	33.1303	32.9906	32.487	31.8728	33.203	31.9236				3	3	3	48.3	48.3	48.3	9.8962	0	74.721	170630000000	97	sp|P12026|ACBP_PIG	sp|P12026|ACBP_PIG	sp|P12026|ACBP_PIG Acyl-CoA-binding protein OS=Sus scrofa OX=9823 GN=DBI PE=1 SV=2
26.0977	27.4416	NaN	26.121	26.6917	28.7778	26.9728	27.7009	27.7988	27.681	26.5769	28.4571	26.942	27.3619	27.3891	28.3808	28.7909	27.9646	27.981	28.0191	27.7096	27.2526	27.8448	28.0453				5	3	3	7.6	5.5	5.5	105.64	0	34.816	7128100000	99	sp|P12036-2|NFH_HUMAN;sp|P12036|NFH_HUMAN;sp|P12037|NFH_PIG	sp|P12036-2|NFH_HUMAN;sp|P12036|NFH_HUMAN	sp|P12036-2|NFH_HUMAN Isoform 2 of Neurofilament heavy polypeptide OS=Homo sapiens OX=9606 GN=NEFH;sp|P12036|NFH_HUMAN Neurofilament heavy polypeptide OS=Homo sapiens OX=9606 GN=NEFH PE=1 SV=4
26.3854	26.3438	26.1511	26.6031	26.5851	25.5967	26.4829	26.3213	25.1677	26.5323	26.0948	25.883	26.0453	26.1882	25.7293	26.2525	25.4544	25.017	26.0258	25.1823	25.7423	26.285	26.425	25.9507				10	10	6	27.8	27.8	19.8	54.846	0	43.648	1811000000	156	sp|P12081-4|SYHC_HUMAN;sp|P12081|SYHC_HUMAN;sp|P12081-3|SYHC_HUMAN;sp|P12081-2|SYHC_HUMAN	sp|P12081-4|SYHC_HUMAN;sp|P12081|SYHC_HUMAN;sp|P12081-3|SYHC_HUMAN;sp|P12081-2|SYHC_HUMAN	sp|P12081-4|SYHC_HUMAN Isoform 4 of Histidine--tRNA ligase, cytoplasmic OS=Homo sapiens OX=9606 GN=HARS;sp|P12081|SYHC_HUMAN Histidine--tRNA ligase, cytoplasmic OS=Homo sapiens OX=9606 GN=HARS PE=1 SV=2;sp|P12081-3|SYHC_HUMAN Isoform 3 of Histidine--tRNA l
26.6583	26.6911	27.0371	27.7705	26.7427	21.5982	26.9691	26.9535	26.7152	28.5442	27.9825	27.6356	25.8495	24.9816	26.0876	25.0977	25.6642	26.0814	26.2407	NaN	24.8354	27.2135	26.1248	26.9434				9	2	2	35.9	6	6	33.064	0.00035051	4.6274	3150700000	46	sp|P12235|ADT1_HUMAN	sp|P12235|ADT1_HUMAN	sp|P12235|ADT1_HUMAN ADP/ATP translocase 1 OS=Homo sapiens OX=9606 GN=SLC25A4 PE=1 SV=4
26.8805	27.2873	27.7688	27.4829	26.8088	27.1738	26.5589	26.9448	26.3171	26.896	26.4882	26.577	26.4409	26.3634	26.6469	26.9995	26.6702	27.1777	26.1712	26.5639	27.2416	26.9759	27.1083	27.3245				7	7	7	21	21	21	55.804	0	37.771	2941800000	124	sp|P12268|IMDH2_HUMAN	sp|P12268|IMDH2_HUMAN	sp|P12268|IMDH2_HUMAN Inosine-5-monophosphate dehydrogenase 2 OS=Homo sapiens OX=9606 GN=IMPDH2 PE=1 SV=2
27.1987	27.1696	26.7231	27.4694	26.8526	26.7048	27.3129	27.1361	27.0843	26.9859	26.6122	26.1577	26.7392	26.7607	26.9422	27.9904	27.6172	26.8779	26.7784	27.1807	27.2328	27.2637	27.0488	26.8835				17	17	17	9.9	9.9	9.9	267.29	0	288.28	3277500000	234	sp|P12270|TPR_HUMAN;sp|P12270-2|TPR_HUMAN	sp|P12270|TPR_HUMAN	sp|P12270|TPR_HUMAN Nucleoprotein TPR OS=Homo sapiens OX=9606 GN=TPR PE=1 SV=3
31.2661	31.0851	31.293	31.6352	30.8871	31.5725	30.9098	31.3444	31.734	31.1725	31.3202	30.3306	31.8756	30.8262	30.627	30.5403	31.6942	31.1503	31.3583	31.119	31.1908	31.383	30.9873	31.2647				4	4	4	14.5	14.5	14.5	36.474	0	323.31	72422000000	288	sp|P12271|RLBP1_HUMAN	sp|P12271|RLBP1_HUMAN	sp|P12271|RLBP1_HUMAN Retinaldehyde-binding protein 1 OS=Homo sapiens OX=9606 GN=RLBP1 PE=1 SV=2
27.3125	27.3236	28.486	29.0529	26.8687	24.7811	27.7682	26.3808	28.4333	27.3598	27.8392	26.9385	27.9391	27.3754	27.783	NaN	27.112	26.1139	27.0854	27.1296	28.9083	25.6456	27.7363	26.302				3	3	3	38.7	38.7	38.7	11.828	0	219.89	3904400000	66	sp|P12309|GLRX1_PIG	sp|P12309|GLRX1_PIG	sp|P12309|GLRX1_PIG Glutaredoxin-1 OS=Sus scrofa OX=9823 GN=GLRX PE=1 SV=2
23.6652	23.8647	23.7818	24.3431	24.8373	23.335	23.6669	24.543	24.0799	24.3394	23.6574	23.0468	23.885	24.4113	23.8271	24.1348	NaN	24.0699	25.2336	24.7895	24.2321	23.9521	23.6932	24.2605				4	4	4	18.4	18.4	18.4	50.47	0	39.353	373920000	42	sp|P12694|ODBA_HUMAN;sp|P12694-2|ODBA_HUMAN	sp|P12694|ODBA_HUMAN;sp|P12694-2|ODBA_HUMAN	sp|P12694|ODBA_HUMAN 2-oxoisovalerate dehydrogenase subunit alpha, mitochondrial OS=Homo sapiens OX=9606 GN=BCKDHA PE=1 SV=2;sp|P12694-2|ODBA_HUMAN Isoform 2 of 2-oxoisovalerate dehydrogenase subunit alpha, mitochondrial OS=Homo sapiens OX=9606 GN=BCKDHA
27.4043	26.8417	28.6359	28.3881	27.0809	27.4037	27.2364	27.7783	27.5568	27.824	27.9062	27.4216	27.6443	26.8979	27.8355	26.6046	27.8764	27.0929	27.5467	27.1284	27.7159	26.6257	27.3622	26.9536				29	19	19	49.9	38	38	103.06	0	323.31	4022700000	279	sp|P12814|ACTN1_HUMAN;sp|P12814-2|ACTN1_HUMAN;sp|P12814-3|ACTN1_HUMAN;sp|P12814-4|ACTN1_HUMAN;sp|P35609-2|ACTN2_HUMAN;sp|P35609|ACTN2_HUMAN;sp|Q08043|ACTN3_HUMAN	sp|P12814|ACTN1_HUMAN;sp|P12814-2|ACTN1_HUMAN;sp|P12814-3|ACTN1_HUMAN;sp|P12814-4|ACTN1_HUMAN	sp|P12814|ACTN1_HUMAN Alpha-actinin-1 OS=Homo sapiens OX=9606 GN=ACTN1 PE=1 SV=2;sp|P12814-2|ACTN1_HUMAN Isoform 2 of Alpha-actinin-1 OS=Homo sapiens OX=9606 GN=ACTN1;sp|P12814-3|ACTN1_HUMAN Isoform 3 of Alpha-actinin-1 OS=Homo sapiens OX=9606 GN=ACTN1;sp|
23.7457	23.5394	23.9788	23.0835	23.9483	24.0805	23.3519	23.4215	23.2192	NaN	23.7681	24.124	23.6403	24.0471	23.0468	NaN	23.9269	23.983	NaN	23.4653	22.6873	23.5142	24.2064	23.8219				5	4	4	15.1	13.6	13.6	59.834	0	198.88	285260000	43	sp|P12931|SRC_HUMAN;sp|P12931-2|SRC_HUMAN	sp|P12931|SRC_HUMAN;sp|P12931-2|SRC_HUMAN	sp|P12931|SRC_HUMAN Proto-oncogene tyrosine-protein kinase Src OS=Homo sapiens OX=9606 GN=SRC PE=1 SV=3;sp|P12931-2|SRC_HUMAN Isoform 2 of Proto-oncogene tyrosine-protein kinase Src OS=Homo sapiens OX=9606 GN=SRC
25.6848	26.7174	26.5577	25.6311	25.4444	25.0374	25.6787	26.0124	26.6592	25.4659	25.6438	24.8756	25.2447	25.0266	25.4738	24.829	24.6032	24.8641	25.117	25.0364	25.5894	26.066	25.655	25.2371				2	2	2	5.8	5.8	5.8	47.261	0	83.659	1072100000	57	sp|P12955-3|PEPD_HUMAN;sp|P12955|PEPD_HUMAN;sp|P12955-2|PEPD_HUMAN	sp|P12955-3|PEPD_HUMAN;sp|P12955|PEPD_HUMAN;sp|P12955-2|PEPD_HUMAN	sp|P12955-3|PEPD_HUMAN Isoform 3 of Xaa-Pro dipeptidase OS=Homo sapiens OX=9606 GN=PEPD;sp|P12955|PEPD_HUMAN Xaa-Pro dipeptidase OS=Homo sapiens OX=9606 GN=PEPD PE=1 SV=3;sp|P12955-2|PEPD_HUMAN Isoform 2 of Xaa-Pro dipeptidase OS=Homo sapiens OX=9606 GN=PE
29.6758	30.0553	29.5173	30.3565	30.2096	30.1633	29.869	29.976	30.2105	30.0404	30.4063	29.8206	29.8824	30.0842	29.863	30.4302	29.7077	29.7962	29.7908	30.1174	29.8413	30.2111	29.8548	30.3604				6	6	6	14.5	14.5	14.5	80.311	0	177.74	30627000000	322	sp|P13591-4|NCAM1_HUMAN;sp|P13591-3|NCAM1_HUMAN;sp|P13591-1|NCAM1_HUMAN;sp|P13591|NCAM1_HUMAN;sp|P13591-5|NCAM1_HUMAN;sp|P13591-6|NCAM1_HUMAN	sp|P13591-4|NCAM1_HUMAN;sp|P13591-3|NCAM1_HUMAN;sp|P13591-1|NCAM1_HUMAN;sp|P13591|NCAM1_HUMAN;sp|P13591-5|NCAM1_HUMAN;sp|P13591-6|NCAM1_HUMAN	sp|P13591-4|NCAM1_HUMAN Isoform 4 of Neural cell adhesion molecule 1 OS=Homo sapiens OX=9606 GN=NCAM1;sp|P13591-3|NCAM1_HUMAN Isoform 3 of Neural cell adhesion molecule 1 OS=Homo sapiens OX=9606 GN=NCAM1;sp|P13591-1|NCAM1_HUMAN Isoform 2 of Neural cell adh
27.3752	28.4326	27.2658	28.1924	28.9463	28.5767	27.9621	27.8377	28.1655	29.3368	28.1493	29.3599	28.3364	27.8866	27.8909	29.396	28.1765	28.8931	28.6031	27.6925	27.6043	28.8734	27.8163	27.8609				5	5	5	63.2	63.2	63.2	8.9299	0	29.202	9800500000	106	sp|P13618|ATP5J_PIG	sp|P13618|ATP5J_PIG	sp|P13618|ATP5J_PIG ATP synthase-coupling factor 6, mitochondrial OS=Sus scrofa OX=9823 GN=ATP5PF PE=1 SV=1
32.7968	33.0875	32.5408	33.1378	33.3517	33.2893	32.7849	33.3631	33.7639	32.831	33.0369	33.575	32.9966	33.2814	33.0947	33.5081	33.5537	33.3988	33.5413	33.3919	32.6441	33.1785	33.4426	33.4348				24	24	14	39.2	39.2	25.3	111.75	0	323.31	254460000000	2182	sp|P13637|AT1A3_HUMAN;sp|P13637-2|AT1A3_HUMAN;sp|P13637-3|AT1A3_HUMAN	sp|P13637|AT1A3_HUMAN;sp|P13637-2|AT1A3_HUMAN;sp|P13637-3|AT1A3_HUMAN	sp|P13637|AT1A3_HUMAN Sodium/potassium-transporting ATPase subunit alpha-3 OS=Homo sapiens OX=9606 GN=ATP1A3 PE=1 SV=3;sp|P13637-2|AT1A3_HUMAN Isoform 2 of Sodium/potassium-transporting ATPase subunit alpha-3 OS=Homo sapiens OX=9606 GN=ATP1A3;sp|P13637-3|A
30.5998	30.4964	30.85	30.3733	30.2321	30.3696	30.6363	30.2996	30.6875	30.4639	30.8364	30.6344	30.5507	30.3746	30.479	30.3056	30.5247	30.5029	30.4294	30.3108	30.9489	30.3739	30.535	30.3889				24	24	24	38.1	38.1	38.1	95.337	0	323.31	36256000000	876	sp|P13639|EF2_HUMAN	sp|P13639|EF2_HUMAN	sp|P13639|EF2_HUMAN Elongation factor 2 OS=Homo sapiens OX=9606 GN=EEF2 PE=1 SV=4
27.4237	26.0581	26.132	27.2374	26.9455	25.9011	27.2923	26.9193	26.1936	26.9677	26.8948	26.4767	27.1122	26.7323	26.9306	26.5427	26.9425	26.6214	26.6676	26.6889	27.2941	26.3193	26.5112	26.5264				3	3	3	6.4	6.4	6.4	72.932	0	42.585	3667700000	153	sp|P13667|PDIA4_HUMAN	sp|P13667|PDIA4_HUMAN	sp|P13667|PDIA4_HUMAN Protein disulfide-isomerase A4 OS=Homo sapiens OX=9606 GN=PDIA4 PE=1 SV=2
26.7963	25.1816	26.3904	26.687	26.6283	26.7873	26.3035	26.0199	25.7551	26.87	26.4204	26.9432	26.7243	26.6082	27.0404	27.0468	26.7015	26.9901	26.8695	26.452	26.8253	26.4502	25.8664	26.3584				8	8	8	30.1	30.1	30.1	61.049	0	67.968	2170900000	138	sp|P13674|P4HA1_HUMAN;sp|P13674-2|P4HA1_HUMAN;sp|P13674-3|P4HA1_HUMAN	sp|P13674|P4HA1_HUMAN;sp|P13674-2|P4HA1_HUMAN;sp|P13674-3|P4HA1_HUMAN	sp|P13674|P4HA1_HUMAN Prolyl 4-hydroxylase subunit alpha-1 OS=Homo sapiens OX=9606 GN=P4HA1 PE=1 SV=2;sp|P13674-2|P4HA1_HUMAN Isoform 2 of Prolyl 4-hydroxylase subunit alpha-1 OS=Homo sapiens OX=9606 GN=P4HA1;sp|P13674-3|P4HA1_HUMAN Isoform 3 of Prolyl 4-h
26.9213	26.9935	27.0583	26.4194	25.9011	25.6759	26.2228	26.5818	26.7142	27.4187	26.6246	26.2279	26.7879	25.9228	25.9813	27.1555	26.0907	27.354	26.0257	25.7691	26.3437	26.8144	26.7859	26.2693				3	3	3	28.5	28.5	28.5	19.595	0	7.1671	4113600000	120	sp|P61288|TCTP_PIG;sp|P13693|TCTP_HUMAN;sp|P13693-2|TCTP_HUMAN	sp|P61288|TCTP_PIG;sp|P13693|TCTP_HUMAN	sp|P61288|TCTP_PIG Translationally-controlled tumor protein OS=Sus scrofa OX=9823 GN=TPT1 PE=2 SV=1;sp|P13693|TCTP_HUMAN Translationally-controlled tumor protein OS=Homo sapiens OX=9606 GN=TPT1 PE=1 SV=1
27.0847	26.2596	27.9293	27.0227	26.6751	25.8654	27.55	26.1847	23.7617	26.1471	26.5088	26.6241	27.6004	24.9507	27.5131	NaN	24.1415	23.532	26.4078	23.7439	27.1298	24.2927	26.7951	25.6543				11	8	8	26.5	21.5	21.5	70.288	0	38.251	2050200000	98	sp|P13796|PLSL_HUMAN;sp|P13796-2|PLSL_HUMAN	sp|P13796|PLSL_HUMAN	sp|P13796|PLSL_HUMAN Plastin-2 OS=Homo sapiens OX=9606 GN=LCP1 PE=1 SV=6
26.9365	25.5234	26.9708	26.9986	26.0077	26.0809	27.2946	26.7652	23.9471	26.8184	27.3696	27.4669	27.1572	26.6761	27.0642	25.0223	26.7411	26.3481	26.6955	25.9887	27.3212	25.8444	26.6439	26.3922				14	14	10	33.3	33.3	26.2	70.81	0	182.69	2755800000	171	sp|P13797|PLST_HUMAN;sp|P13797-3|PLST_HUMAN;sp|P13797-2|PLST_HUMAN	sp|P13797|PLST_HUMAN;sp|P13797-3|PLST_HUMAN;sp|P13797-2|PLST_HUMAN	sp|P13797|PLST_HUMAN Plastin-3 OS=Homo sapiens OX=9606 GN=PLS3 PE=1 SV=4;sp|P13797-3|PLST_HUMAN Isoform 3 of Plastin-3 OS=Homo sapiens OX=9606 GN=PLS3;sp|P13797-2|PLST_HUMAN Isoform 2 of Plastin-3 OS=Homo sapiens OX=9606 GN=PLS3
28.8578	28.8161	28.2739	28.6482	28.833	28.8135	28.2922	28.0657	29.3775	28.9795	29.0458	29.1727	29.3598	29.1144	28.3217	30.1836	29.5145	29.2173	29.4513	29.0042	28.2012	28.7833	29.2181	28.5912				6	6	6	29.7	29.7	29.7	35.079	0	267.24	11522000000	128	sp|P13804|ETFA_HUMAN;sp|P13804-2|ETFA_HUMAN	sp|P13804|ETFA_HUMAN;sp|P13804-2|ETFA_HUMAN	sp|P13804|ETFA_HUMAN Electron transfer flavoprotein subunit alpha, mitochondrial OS=Homo sapiens OX=9606 GN=ETFA PE=1 SV=1;sp|P13804-2|ETFA_HUMAN Isoform 2 of Electron transfer flavoprotein subunit alpha, mitochondrial OS=Homo sapiens OX=9606 GN=ETFA
24.7685	24.4635	24.5472	23.5447	25.421	24.5337	24.6286	25.1772	23.8016	25.052	25.5017	25.3364	24.4549	22.5121	24.982	23.966	24.3713	NaN	NaN	24.4053	25.0719	24.8883	24.4239	24.7719				7	7	7	17.1	17.1	17.1	83.785	0	15.103	610820000	84	sp|P13807|GYS1_HUMAN;sp|P13807-2|GYS1_HUMAN	sp|P13807|GYS1_HUMAN;sp|P13807-2|GYS1_HUMAN	sp|P13807|GYS1_HUMAN Glycogen [starch] synthase, muscle OS=Homo sapiens OX=9606 GN=GYS1 PE=1 SV=2;sp|P13807-2|GYS1_HUMAN Isoform 2 of Glycogen [starch] synthase, muscle OS=Homo sapiens OX=9606 GN=GYS1
29.8808	29.6809	29.4533	29.8193	29.2221	29.9892	29.4867	29.6834	29.6557	29.2255	29.7776	29.8444	29.7082	29.5898	29.8564	30.0381	29.2852	30.3957	29.5647	30.0089	29.362	29.9112	29.8997	30.0832				10	10	8	33.8	33.8	26.2	43.066	0	323.31	22163000000	414	sp|P13861-2|KAP2_HUMAN;sp|P13861|KAP2_HUMAN;sp|P05207|KAP2_PIG	sp|P13861-2|KAP2_HUMAN;sp|P13861|KAP2_HUMAN	sp|P13861-2|KAP2_HUMAN Isoform 2 of cAMP-dependent protein kinase type II-alpha regulatory subunit OS=Homo sapiens OX=9606 GN=PRKAR2A;sp|P13861|KAP2_HUMAN cAMP-dependent protein kinase type II-alpha regulatory subunit OS=Homo sapiens OX=9606 GN=PRKAR2A PE=
33.5501	32.9387	33.6194	33.8653	32.0219	31.7015	33.5262	31.9827	32.8056	32.5993	32.4721	32.3786	33.1295	31.6912	33.16	31.2921	32.898	32.6416	32.835	30.9534	32.6598	31.195	31.7397	31.8882				6	6	6	13.4	13.4	13.4	49.88	0	163.83	165040000000	277	sp|P14136|GFAP_HUMAN;sp|P14136-3|GFAP_HUMAN;sp|P14136-2|GFAP_HUMAN	sp|P14136|GFAP_HUMAN;sp|P14136-3|GFAP_HUMAN;sp|P14136-2|GFAP_HUMAN	sp|P14136|GFAP_HUMAN Glial fibrillary acidic protein OS=Homo sapiens OX=9606 GN=GFAP PE=1 SV=1;sp|P14136-3|GFAP_HUMAN Isoform 3 of Glial fibrillary acidic protein OS=Homo sapiens OX=9606 GN=GFAP;sp|P14136-2|GFAP_HUMAN Isoform 2 of Glial fibrillary acidic p
27.1035	25.792	27.192	28.5007	27.2868	26.5542	26.9342	26.9187	26.8604	26.6724	27.7513	26.8469	26.4643	24.822	26.423	25.5373	27.4622	NaN	27.6447	26.1173	27.7259	25.7456	26.9453	26.4497				4	4	4	23.1	23.1	23.1	33.668	0	101.26	2537800000	75	sp|P14287|OSTP_PIG	sp|P14287|OSTP_PIG	sp|P14287|OSTP_PIG Osteopontin OS=Sus scrofa OX=9823 GN=SPP1 PE=1 SV=1
25.8887	25.9405	26.2784	25.4795	NaN	25.3266	26.0897	26.2105	26.1902	26.4296	25.3242	25.534	25.7819	24.8851	25.153	24.5846	25.4747	25.464	26.0154	25.8958	25.557	25.8896	NaN	25.8082				2	2	2	5.5	5.5	5.5	59.177	0	26.66	1633500000	32	sp|P14314-2|GLU2B_HUMAN;sp|P14314|GLU2B_HUMAN	sp|P14314-2|GLU2B_HUMAN;sp|P14314|GLU2B_HUMAN	sp|P14314-2|GLU2B_HUMAN Isoform 2 of Glucosidase 2 subunit beta OS=Homo sapiens OX=9606 GN=PRKCSH;sp|P14314|GLU2B_HUMAN Glucosidase 2 subunit beta OS=Homo sapiens OX=9606 GN=PRKCSH PE=1 SV=2
26.1019	26.327	26.4829	25.5052	26.7902	25.871	26.6826	26.367	25.75	26.5886	26.8167	26.0053	26.3546	25.8768	26.9465	NaN	26.5259	26.2543	26.1736	26.3098	27.4672	25.8518	26.0985	25.7079				6	5	5	37.2	28	28	27.805	0	86.875	1786500000	105	sp|P14332|6PGD_PIG	sp|P14332|6PGD_PIG	sp|P14332|6PGD_PIG 6-phosphogluconate dehydrogenase, decarboxylating (Fragment) OS=Sus scrofa OX=9823 GN=PGD PE=2 SV=3
25.723	NaN	25.7487	24.0376	26.3589	24.6714	24.7842	24.3473	25.2333	26.2762	24.8337	26.3647	25.9677	25.6898	26.0439	26.7103	25.4164	25.8521	26.8042	NaN	26.1745	23.8313	26.3174	25.2699				2	2	2	10	10	10	33.367	0	114.68	1159700000	44	sp|P14415|AT1B2_HUMAN	sp|P14415|AT1B2_HUMAN	sp|P14415|AT1B2_HUMAN Sodium/potassium-transporting ATPase subunit beta-2 OS=Homo sapiens OX=9606 GN=ATP1B2 PE=1 SV=3
29.6896	29.8596	30.5578	28.0682	28.7716	28.2867	30.1813	30.0931	29.195	30.0441	28.742	29.3334	29.4531	30.106	29.7788	28.3472	29.6173	29.1912	30.0272	29.8483	29.965	29.9071	29.7396	29.1946				20	3	3	40.5	5.3	5.3	57.936	0	57.998	29104000000	194	sp|P14618|KPYM_HUMAN;sp|P14618-3|KPYM_HUMAN;sp|P30613-2|KPYR_HUMAN	sp|P14618|KPYM_HUMAN;sp|P14618-3|KPYM_HUMAN	sp|P14618|KPYM_HUMAN Pyruvate kinase PKM OS=Homo sapiens OX=9606 GN=PKM PE=1 SV=4;sp|P14618-3|KPYM_HUMAN Isoform 3 of Pyruvate kinase PKM OS=Homo sapiens OX=9606 GN=PKM
34.1423	34.1634	34.3999	34.1925	34.539	34.34	34.0465	34.5171	34.1205	34.4542	33.8523	33.8812	34.4107	34.3231	34.1481	34.1858	34.2388	34.3304	34.2899	34.1698	33.9434	34.736	34.5327	34.6914				20	20	3	43.3	43.3	8.1	58.061	0	323.31	605820000000	3069	sp|P14618-2|KPYM_HUMAN	sp|P14618-2|KPYM_HUMAN	sp|P14618-2|KPYM_HUMAN Isoform M1 of Pyruvate kinase PKM OS=Homo sapiens OX=9606 GN=PKM
26.9204	26.5948	25.9628	27.0876	26.2232	26.0201	26.8382	26.563	27.5742	26.6462	26.6755	26.4998	26.998	24.3617	23.9145	25.5847	26.3967	26.5995	25.9519	23.6704	26.3894	26.6821	26.3742	25.7322				5	5	5	26.8	26.8	26.8	23.656	0	74.628	2593200000	88	sp|P14678-2|RSMB_HUMAN;sp|P14678|RSMB_HUMAN;sp|P63162|RSMN_HUMAN;sp|P63162-2|RSMN_HUMAN;sp|P14678-3|RSMB_HUMAN	sp|P14678-2|RSMB_HUMAN;sp|P14678|RSMB_HUMAN;sp|P63162|RSMN_HUMAN;sp|P63162-2|RSMN_HUMAN;sp|P14678-3|RSMB_HUMAN	sp|P14678-2|RSMB_HUMAN Isoform SM-B of Small nuclear ribonucleoprotein-associated proteins B and B OS=Homo sapiens OX=9606 GN=SNRPB;sp|P14678|RSMB_HUMAN Small nuclear ribonucleoprotein-associated proteins B and B OS=Homo sapiens OX=9606 GN=SNRPB PE=1 SV=
23.835	24.1134	24.4586	23.7793	23.1574	23.8915	23.7762	23.7508	24.5959	23.639	25.2259	23.8728	23.4578	24.48	24.3326	23.9426	24.9234	24.52	23.9998	24.036	23.84	24.2072	24.2711	23.6884				4	4	4	5.2	5.2	5.2	117.97	0	7.5777	401560000	65	sp|P14735|IDE_HUMAN	sp|P14735|IDE_HUMAN	sp|P14735|IDE_HUMAN Insulin-degrading enzyme OS=Homo sapiens OX=9606 GN=IDE PE=1 SV=4
29.3373	29.0451	29.5013	29.7441	29.3987	29.5968	29.1271	28.9389	29.0498	29.9803	29.5496	29.7778	29.3947	29.3397	29.4498	29.1692	29.5936	29.9429	29.7975	29.8918	29.6491	29.3607	29.4638	29.0913				13	13	13	49.1	49.1	49.1	64.132	0	323.31	21044000000	563	sp|P14866|HNRPL_HUMAN;sp|P14866-2|HNRPL_HUMAN	sp|P14866|HNRPL_HUMAN;sp|P14866-2|HNRPL_HUMAN	sp|P14866|HNRPL_HUMAN Heterogeneous nuclear ribonucleoprotein L OS=Homo sapiens OX=9606 GN=HNRNPL PE=1 SV=2;sp|P14866-2|HNRPL_HUMAN Isoform 2 of Heterogeneous nuclear ribonucleoprotein L OS=Homo sapiens OX=9606 GN=HNRNPL
27.6942	27.8569	27.9241	27.1222	26.6874	27.0984	27.7315	27.8877	28.0607	25.0908	27.4307	27.0965	27.3046	27.3735	27.6639	27.3856	26.8644	27.5068	26.4598	27.3245	27.525	27.3664	27.0153	27.2825				8	8	8	18	18	18	57.136	0	151.81	4613800000	161	sp|P14868|SYDC_HUMAN;sp|P14868-2|SYDC_HUMAN	sp|P14868|SYDC_HUMAN;sp|P14868-2|SYDC_HUMAN	sp|P14868|SYDC_HUMAN Aspartate--tRNA ligase, cytoplasmic OS=Homo sapiens OX=9606 GN=DARS PE=1 SV=2;sp|P14868-2|SYDC_HUMAN Isoform 2 of Aspartate--tRNA ligase, cytoplasmic OS=Homo sapiens OX=9606 GN=DARS
27.9229	27.3709	29.6728	28.8565	28.378	27.8377	27.9006	27.8843	28.381	28.8284	29.1043	27.7727	28.1205	28.2344	28.6415	28.2591	28.2708	27.6353	28.3653	28.3453	28.7164	28.2348	27.5276	27.2249				24	24	24	42.7	42.7	42.7	108.83	0	323.31	7284200000	538	sp|P15145|AMPN_PIG	sp|P15145|AMPN_PIG	sp|P15145|AMPN_PIG Aminopeptidase N OS=Sus scrofa OX=9823 GN=ANPEP PE=1 SV=4
23.9483	24.4914	25.4433	24.2368	23.8879	25.6268	24.9821	23.5748	24.0894	26.4959	25.223	NaN	24.5406	NaN	24.9653	24.3996	NaN	25.0613	22.7203	24.1592	24.0915	24.4288	23.6818	23.238				2	2	2	10	10	10	55.755	0	13.145	605590000	44	sp|P15170|ERF3A_HUMAN;sp|P15170-2|ERF3A_HUMAN;sp|P15170-3|ERF3A_HUMAN	sp|P15170|ERF3A_HUMAN;sp|P15170-2|ERF3A_HUMAN;sp|P15170-3|ERF3A_HUMAN	sp|P15170|ERF3A_HUMAN Eukaryotic peptide chain release factor GTP-binding subunit ERF3A OS=Homo sapiens OX=9606 GN=GSPT1 PE=1 SV=1;sp|P15170-2|ERF3A_HUMAN Isoform 2 of Eukaryotic peptide chain release factor GTP-binding subunit ERF3A OS=Homo sapiens OX=960
26.126	25.4608	25.9842	25.703	25.2156	25.4603	26.141	25.2701	25.4602	25.4474	26.7429	25.9541	26.0073	24.9464	26.4099	24.1413	25.237	25.2843	25.3824	27.8659	26.2126	25.3148	25.9934	25.0593				10	4	4	19.6	10.4	10.4	69.412	0	191.15	1443200000	158	sp|P15311|EZRI_HUMAN	sp|P15311|EZRI_HUMAN	sp|P15311|EZRI_HUMAN Ezrin OS=Homo sapiens OX=9606 GN=EZR PE=1 SV=4
28.3589	28.5216	28.6779	27.4895	28.3321	28.5096	28.3867	28.5702	27.9922	28.1139	28.6453	28.313	27.8251	27.8755	28.2035	28.9726	28.2088	27.6654	28.0633	28.0974	28.2482	28.3486	28.705	28.349				7	7	7	29.7	29.7	29.7	31.324	0	212.21	7778200000	205	sp|P15880|RS2_HUMAN	sp|P15880|RS2_HUMAN	sp|P15880|RS2_HUMAN 40S ribosomal protein S2 OS=Homo sapiens OX=9606 GN=RPS2 PE=1 SV=2
24.2082	24.1021	24.4768	23.4339	24.5348	24.0267	24.1661	24.321	24.2879	23.9245	24.6524	24.2184	23.6441	23.1486	24.369	23.9482	24.0301	NaN	23.9522	24.1164	24.0732	23.964	24.2417	23.8914				4	4	4	12.9	12.9	12.9	50.033	0	9.0716	402050000	73	sp|P15882-3|CHIN_HUMAN;sp|P15882|CHIN_HUMAN;sp|P15882-2|CHIN_HUMAN	sp|P15882-3|CHIN_HUMAN;sp|P15882|CHIN_HUMAN;sp|P15882-2|CHIN_HUMAN	sp|P15882-3|CHIN_HUMAN Isoform 3 of N-chimaerin OS=Homo sapiens OX=9606 GN=CHN1;sp|P15882|CHIN_HUMAN N-chimaerin OS=Homo sapiens OX=9606 GN=CHN1 PE=1 SV=3;sp|P15882-2|CHIN_HUMAN Isoform Alpha-1 of N-chimaerin OS=Homo sapiens OX=9606 GN=CHN1
32.5784	32.9815	32.1621	28.831	32.9909	32.8608	32.5942	32.6504	31.6677	31.8448	32.3011	33.0434	32.363	31.5818	32.8762	33.2591	32.2968	32.1494	33.2286	32.1831	32.941	33.0872	32.3886	32.7613				5	5	2	53.8	53.8	22.4	15.144	0	323.31	162410000000	690	sp|P16104|H2AX_HUMAN;sp|Q8IUE6|H2A2B_HUMAN;sp|Q96QV6|H2A1A_HUMAN	sp|P16104|H2AX_HUMAN;sp|Q8IUE6|H2A2B_HUMAN;sp|Q96QV6|H2A1A_HUMAN	sp|P16104|H2AX_HUMAN Histone H2AX OS=Homo sapiens OX=9606 GN=H2AFX PE=1 SV=2;sp|Q8IUE6|H2A2B_HUMAN Histone H2A type 2-B OS=Homo sapiens OX=9606 GN=HIST2H2AB PE=1 SV=3;sp|Q96QV6|H2A1A_HUMAN Histone H2A type 1-A OS=Homo sapiens OX=9606 GN=HIST1H2AA PE=1 SV=3
25.212	24.8027	25.4996	25.4278	25.2202	26.6661	25.6271	26.3012	25.5218	25.9047	24.5348	25.8593	25.3872	26.0255	25.5277	26.2831	26.5836	25.8508	26.4595	26.5613	24.6949	25.7823	25.8514	26.2582				12	12	12	12.9	12.9	12.9	166.48	0	110.55	1532100000	98	sp|P16157-2|ANK1_HUMAN;sp|P16157-11|ANK1_HUMAN;sp|P16157-9|ANK1_HUMAN;sp|P16157-6|ANK1_HUMAN;sp|P16157-7|ANK1_HUMAN;sp|P16157-4|ANK1_HUMAN;sp|P16157-13|ANK1_HUMAN;sp|P16157-10|ANK1_HUMAN;sp|P16157-15|ANK1_HUMAN;sp|P16157-8|ANK1_HUMAN;sp|P16157-5|ANK1_HUMAN;sp|P16157-16|ANK1_HUMAN;sp|P16157-3|ANK1_HUMAN;sp|P16157|ANK1_HUMAN;sp|P16157-21|ANK1_HUMAN;sp|P16157-12|ANK1_HUMAN;sp|P16157-14|ANK1_HUMAN	sp|P16157-2|ANK1_HUMAN;sp|P16157-11|ANK1_HUMAN;sp|P16157-9|ANK1_HUMAN;sp|P16157-6|ANK1_HUMAN;sp|P16157-7|ANK1_HUMAN;sp|P16157-4|ANK1_HUMAN;sp|P16157-13|ANK1_HUMAN;sp|P16157-10|ANK1_HUMAN;sp|P16157-15|ANK1_HUMAN;sp|P16157-8|ANK1_HUMAN;sp|P16157-5|ANK1_HUMAN;sp|P16157-16|ANK1_HUMAN;sp|P16157-3|ANK1_HUMAN;sp|P16157|ANK1_HUMAN;sp|P16157-21|ANK1_HUMAN;sp|P16157-12|ANK1_HUMAN;sp|P16157-14|ANK1_HUMAN	sp|P16157-2|ANK1_HUMAN Isoform Er16 of Ankyrin-1 OS=Homo sapiens OX=9606 GN=ANK1;sp|P16157-11|ANK1_HUMAN Isoform Er10 of Ankyrin-1 OS=Homo sapiens OX=9606 GN=ANK1;sp|P16157-9|ANK1_HUMAN Isoform Er8 of Ankyrin-1 OS=Homo sapiens OX=9606 GN=ANK1;sp|P16157-6|A
31.3399	31.7162	31.058	31.2591	31.3338	31.7668	31.1408	31.6981	32.0922	31.4711	31.5103	31.0854	31.3548	31.7459	31.496	31.7063	31.8896	31.8458	31.8302	32.1027	31.2154	31.6504	31.677	31.8197				28	28	9	47.4	47.4	16.1	85.76	0	323.31	77144000000	933	sp|P16276|ACON_PIG	sp|P16276|ACON_PIG	sp|P16276|ACON_PIG Aconitate hydratase, mitochondrial OS=Sus scrofa OX=9823 GN=ACO2 PE=1 SV=1
29.4445	28.9581	27.9928	28.7104	27.9238	27.8287	29.1275	29.1894	28.9895	27.6371	28.4719	27.5638	28.1046	27.8674	27.5638	27.3199	28.3702	28.5394	NaN	27.1707	28.1083	29.1478	29.0265	28.3229				2	2	2	9.3	9.3	9.3	22.58	0.00036337	5.3137	10388000000	30	sp|P16401|H15_HUMAN	sp|P16401|H15_HUMAN	sp|P16401|H15_HUMAN Histone H1.5 OS=Homo sapiens OX=9606 GN=HIST1H1B PE=1 SV=3
27.2628	28.0352	27.0335	26.7223	27.8098	27.2996	26.9792	27.8802	26.7453	27.6129	26.645	27.7	27.4579	27.7396	27.0815	27.0965	28.2295	27.4576	27.7121	27.3771	27.2972	27.7235	27.6259	27.6571				13	8	8	19	12.3	12.3	99.546	0	323.31	5178000000	293	sp|P16499|PDE6A_HUMAN	sp|P16499|PDE6A_HUMAN	sp|P16499|PDE6A_HUMAN Rod cGMP-specific 3,5-cyclic phosphodiesterase subunit alpha OS=Homo sapiens OX=9606 GN=PDE6A PE=1 SV=4
28.2498	27.6805	27.8326	28.1201	28.5478	28.8533	27.0372	27.5976	28.5776	28.8514	29.353	28.7628	27.9364	28.4687	27.8448	28.0695	27.913	28.3559	28.4537	28.2459	28.1145	28.0702	28.0477	28.0798				5	5	5	33.5	33.5	33.5	37.221	0	317.54	8218600000	417	sp|P16520|GBB3_HUMAN;sp|P16520-2|GBB3_HUMAN	sp|P16520|GBB3_HUMAN;sp|P16520-2|GBB3_HUMAN	sp|P16520|GBB3_HUMAN Guanine nucleotide-binding protein G(I)/G(S)/G(T) subunit beta-3 OS=Homo sapiens OX=9606 GN=GNB3 PE=1 SV=1;sp|P16520-2|GBB3_HUMAN Isoform 2 of Guanine nucleotide-binding protein G(I)/G(S)/G(T) subunit beta-3 OS=Homo sapiens OX=9606 GN=
28.3895	28.9443	27.7739	28.8753	27.5943	29.0064	29.5067	28.961	28.6379	28.0468	27.4845	28.148	27.923	28.3128	28.4794	28.1335	28.2033	27.8199	27.984	27.4308	27.9071	28.2752	28.3708	28.2101				4	4	3	24.2	24.2	18.1	17.302	0	59.486	9120900000	102	sp|Q6DUB7|STMN1_PIG;sp|P16949|STMN1_HUMAN;sp|P16949-2|STMN1_HUMAN	sp|Q6DUB7|STMN1_PIG;sp|P16949|STMN1_HUMAN;sp|P16949-2|STMN1_HUMAN	sp|Q6DUB7|STMN1_PIG Stathmin OS=Sus scrofa OX=9823 GN=STMN1 PE=2 SV=3;sp|P16949|STMN1_HUMAN Stathmin OS=Homo sapiens OX=9606 GN=STMN1 PE=1 SV=3;sp|P16949-2|STMN1_HUMAN Isoform 2 of Stathmin OS=Homo sapiens OX=9606 GN=STMN1
26.3559	25.3886	28.2716	NaN	23.9983	25.8029	26.9309	26.4442	26.3606	26.0555	27.5342	25.5358	25.9406	23.053	26.545	23.8811	25.9852	23.0713	26.0723	24.8977	28.8487	24.7482	22.0866	24.3773				5	5	5	1.9	1.9	1.9	565.33	0.0033012	2.1728	1841000000	23	sp|P16960|RYR1_PIG;sp|P21817-2|RYR1_HUMAN;sp|P21817|RYR1_HUMAN;sp|P21817-3|RYR1_HUMAN	sp|P16960|RYR1_PIG;sp|P21817-2|RYR1_HUMAN;sp|P21817|RYR1_HUMAN	sp|P16960|RYR1_PIG Ryanodine receptor 1 OS=Sus scrofa OX=9823 GN=RYR1 PE=2 SV=2;sp|P21817-2|RYR1_HUMAN Isoform 2 of Ryanodine receptor 1 OS=Homo sapiens OX=9606 GN=RYR1;sp|P21817|RYR1_HUMAN Ryanodine receptor 1 OS=Homo sapiens OX=9606 GN=RYR1 PE=1 SV=3
27.7679	27.1882	27.8999	26.9192	27.2322	27.5351	26.9809	27.1277	27.3057	27.6654	26.9588	27.1588	27.0806	27.1536	27.4176	27.1675	27.7767	27.6574	27.5424	28.1456	27.3361	27.0712	27.3253	27.2231				10	10	6	23.2	23.2	13.4	76.749	0	229.92	4226700000	253	sp|P17252|KPCA_HUMAN;sp|P05129-2|KPCG_HUMAN;sp|P05129|KPCG_HUMAN	sp|P17252|KPCA_HUMAN	sp|P17252|KPCA_HUMAN Protein kinase C alpha type OS=Homo sapiens OX=9606 GN=PRKCA PE=1 SV=4
24.8406	23.7242	24.7817	24.8868	24.4151	24.0964	24.3817	25.1531	25.2225	24.039	23.0579	24.358	24.3034	24.1156	23.8507	NaN	24.587	24.5173	24.9679	23.6597	22.2728	24.3217	24.6309	24.2835				6	6	6	7.6	7.6	7.6	129.29	0	31.36	483470000	60	sp|P17301|ITA2_HUMAN	sp|P17301|ITA2_HUMAN	sp|P17301|ITA2_HUMAN Integrin alpha-2 OS=Homo sapiens OX=9606 GN=ITGA2 PE=1 SV=1
28.6483	28.9369	27.7292	28.5901	28.2073	28.1137	28.7438	28.6549	29.1397	28.8005	28.1891	28.2875	28.6791	28.9455	28.4842	28.6497	29.0558	29.1875	28.8123	29.338	28.6624	28.8381	28.9636	29.239				14	14	12	27.2	27.2	23.8	74.111	0	310.75	13348000000	280	sp|P17600|SYN1_HUMAN;sp|P17600-2|SYN1_HUMAN	sp|P17600|SYN1_HUMAN;sp|P17600-2|SYN1_HUMAN	sp|P17600|SYN1_HUMAN Synapsin-1 OS=Homo sapiens OX=9606 GN=SYN1 PE=1 SV=3;sp|P17600-2|SYN1_HUMAN Isoform IB of Synapsin-1 OS=Homo sapiens OX=9606 GN=SYN1
27.0861	27.275	27.0256	26.5876	27.3133	27.3654	26.8694	26.9649	27.3119	27.2502	27.387	27.2789	26.4476	26.6832	26.8142	26.5474	27.3364	26.613	27.0742	27.6592	26.8171	27.4987	27.1961	26.8952				7	7	3	34.1	34.1	9	39.821	0	210.38	4094700000	218	sp|P17612-2|KAPCA_HUMAN;sp|P36887|KAPCA_PIG;sp|P17612|KAPCA_HUMAN	sp|P17612-2|KAPCA_HUMAN;sp|P36887|KAPCA_PIG;sp|P17612|KAPCA_HUMAN	sp|P17612-2|KAPCA_HUMAN Isoform 2 of cAMP-dependent protein kinase catalytic subunit alpha OS=Homo sapiens OX=9606 GN=PRKACA;sp|P36887|KAPCA_PIG cAMP-dependent protein kinase catalytic subunit alpha OS=Sus scrofa OX=9823 GN=PRKACA PE=1 SV=4;sp|P17612|KAPCA
26.9857	26.515	26.891	26.6168	26.4368	26.7533	26.7323	26.4205	25.7814	27.1715	26.7201	26.6784	26.0945	25.8676	26.8234	27.8256	26.8897	26.4723	26.3391	26.1641	26.9492	26.3182	26.4583	25.9436				10	10	5	21.7	21.7	10.6	71.475	0	63.074	1999500000	197	sp|P17655-2|CAN2_HUMAN;sp|P17655|CAN2_HUMAN	sp|P17655-2|CAN2_HUMAN;sp|P17655|CAN2_HUMAN	sp|P17655-2|CAN2_HUMAN Isoform 2 of Calpain-2 catalytic subunit OS=Homo sapiens OX=9606 GN=CAPN2;sp|P17655|CAN2_HUMAN Calpain-2 catalytic subunit OS=Homo sapiens OX=9606 GN=CAPN2 PE=1 SV=6
27.6775	27.5237	27.7007	27.7134	25.757	27.0581	27.6203	27.5221	27.8522	27.6939	27.7073	26.4002	27.0866	26.8987	28.0159	27.281	27.4942	27.4584	27.4699	27.7266	27.8797	26.8355	27.4593	27.4387				16	11	11	37.5	28	28	69.147	0	191.82	4481700000	165	sp|P17844|DDX5_HUMAN;sp|P17844-2|DDX5_HUMAN	sp|P17844|DDX5_HUMAN;sp|P17844-2|DDX5_HUMAN	sp|P17844|DDX5_HUMAN Probable ATP-dependent RNA helicase DDX5 OS=Homo sapiens OX=9606 GN=DDX5 PE=1 SV=1;sp|P17844-2|DDX5_HUMAN Isoform 2 of Probable ATP-dependent RNA helicase DDX5 OS=Homo sapiens OX=9606 GN=DDX5
29.7324	28.8734	29.3719	29.3965	28.5639	28.9149	29.0449	29.6235	29.9031	29.4493	28.8667	28.7427	29.2916	29.0289	29.2007	28.9342	29.6918	29.6041	29.8581	29.3336	28.7792	29.6144	29.5992	29.1267				9	8	7	19.4	18.2	15.8	85.018	0	323.31	18450000000	295	sp|P17858|PFKAL_HUMAN;sp|P17858-2|PFKAL_HUMAN	sp|P17858|PFKAL_HUMAN;sp|P17858-2|PFKAL_HUMAN	sp|P17858|PFKAL_HUMAN ATP-dependent 6-phosphofructokinase, liver type OS=Homo sapiens OX=9606 GN=PFKL PE=1 SV=6;sp|P17858-2|PFKAL_HUMAN Isoform 2 of ATP-dependent 6-phosphofructokinase, liver type OS=Homo sapiens OX=9606 GN=PFKL
28.2079	27.6468	28.3877	27.8374	28.1548	28.0189	27.989	27.9671	28.2222	28.0504	28.2901	28.0179	27.622	27.7841	27.8215	27.9301	28.2741	27.7652	28.2633	27.8628	27.9044	27.746	27.7556	27.9197				13	13	13	47.6	47.6	47.6	49.203	0	323.31	6527100000	422	sp|P17980|PRS6A_HUMAN	sp|P17980|PRS6A_HUMAN	sp|P17980|PRS6A_HUMAN 26S proteasome regulatory subunit 6A OS=Homo sapiens OX=9606 GN=PSMC3 PE=1 SV=3
29.9242	30.0556	29.7419	29.7315	29.9622	30.0842	29.9303	29.7838	30.1978	29.5673	29.5444	30.1745	30.0461	29.7771	30.0411	30.1594	29.4715	30.0883	29.5158	29.727	30.0101	29.8542	29.8617	29.9313				16	16	16	45.5	45.5	45.5	60.343	0	323.31	25921000000	764	sp|P17987|TCPA_HUMAN	sp|P17987|TCPA_HUMAN	sp|P17987|TCPA_HUMAN T-complex protein 1 subunit alpha OS=Homo sapiens OX=9606 GN=TCP1 PE=1 SV=1
24.9012	25.0338	24.8229	24.3136	22.999	24.8597	24.7229	24.9956	24.511	24.2332	25.3122	25.4276	24.2648	24.025	23.7937	NaN	22.5387	24.5649	23.8326	23.27	24.4945	24.7974	24.1512	24.8771				5	5	5	11.3	11.3	11.3	88.053	0	12.396	686300000	66	sp|P18084|ITB5_HUMAN	sp|P18084|ITB5_HUMAN	sp|P18084|ITB5_HUMAN Integrin beta-5 OS=Homo sapiens OX=9606 GN=ITGB5 PE=1 SV=1
24.9444	24.2664	25.4351	24.8487	26.1972	25.6256	24.9853	25.4117	25.5108	26.555	26.5139	25.8058	25.9161	25.9924	25.2263	NaN	25.3711	24.9293	26.6619	25.2249	25.27	24.7853	25.4502	24.5164				6	2	2	52.8	23.9	23.9	20.511	0	98.84	1323100000	86	sp|P18085|ARF4_HUMAN	sp|P18085|ARF4_HUMAN	sp|P18085|ARF4_HUMAN ADP-ribosylation factor 4 OS=Homo sapiens OX=9606 GN=ARF4 PE=1 SV=3
26.6865	26.3414	27.8616	27.4876	27.201	27.4398	27.1064	27.1218	27.4753	26.8451	26.4936	26.3403	25.7775	26.87	27.9205	26.4239	26.5664	26.7308	26.8272	27.5302	26.8764	27.2954	26.8638	26.2899				4	4	4	21.4	21.4	21.4	29.225	0	24.882	3620600000	127	sp|P18124|RL7_HUMAN	sp|P18124|RL7_HUMAN	sp|P18124|RL7_HUMAN 60S ribosomal protein L7 OS=Homo sapiens OX=9606 GN=RPL7 PE=1 SV=1
28.8132	28.3443	28.8912	28.9963	28.5189	28.5546	29.0304	28.6703	29.0706	28.5768	28.7896	28.0247	28.5538	27.9826	28.4918	28.0188	28.2388	28.3978	28.4142	28.0212	29.1179	28.281	28.5676	28.5943				21	21	21	35.6	35.6	35.6	116.72	0	323.31	9775100000	438	sp|P18206-2|VINC_HUMAN;sp|P26234-2|VINC_PIG;sp|P18206|VINC_HUMAN;sp|P26234|VINC_PIG;sp|P18206-3|VINC_HUMAN	sp|P18206-2|VINC_HUMAN;sp|P26234-2|VINC_PIG;sp|P18206|VINC_HUMAN;sp|P26234|VINC_PIG	sp|P18206-2|VINC_HUMAN Isoform 1 of Vinculin OS=Homo sapiens OX=9606 GN=VCL;sp|P26234-2|VINC_PIG Isoform 1 of Vinculin OS=Sus scrofa OX=9823 GN=VCL;sp|P18206|VINC_HUMAN Vinculin OS=Homo sapiens OX=9606 GN=VCL PE=1 SV=4;sp|P26234|VINC_PIG Vinculin OS=Sus sc
24.1881	24.4389	24.8231	23.7415	25.4501	23.949	24.5055	24.2132	24.1994	24.2037	24.1662	25.073	24.1701	24.4395	23.8632	24.684	24.2019	23.593	24.2666	24.2199	24.3467	24.6701	24.2896	24.4661				8	8	8	17	17	17	89.702	0	18.869	547510000	81	sp|P18433-6|PTPRA_HUMAN;sp|P18433|PTPRA_HUMAN	sp|P18433-6|PTPRA_HUMAN;sp|P18433|PTPRA_HUMAN	sp|P18433-6|PTPRA_HUMAN Isoform 2 of Receptor-type tyrosine-protein phosphatase alpha OS=Homo sapiens OX=9606 GN=PTPRA;sp|P18433|PTPRA_HUMAN Receptor-type tyrosine-protein phosphatase alpha OS=Homo sapiens OX=9606 GN=PTPRA PE=1 SV=3
29.6739	28.7591	31.8524	30.0178	28.4441	28.9863	31.9009	29.0908	28.5848	29.0084	30.4021	29.4247	29.2501	28.3969	29.5274	29.153	28.9827	28.2348	29.0005	28.1	31.8159	28.8083	28.8804	28.9179				13	13	13	48.7	48.7	48.7	30.325	0	323.31	24260000000	326	sp|P18648|APOA1_PIG;CON__P15497;sp|P02647|APOA1_HUMAN	sp|P18648|APOA1_PIG	sp|P18648|APOA1_PIG Apolipoprotein A-I OS=Sus scrofa OX=9823 GN=APOA1 PE=1 SV=4
33.2388	32.9527	33.4204	33.016	33.0328	33.0227	32.9374	32.9868	33.2108	32.8193	32.3072	32.4462	32.5915	32.9875	32.9209	32.8758	33.7123	33.211	33.25	32.9274	33.2026	33.129	32.9033	33.0223				12	12	12	64.6	64.6	64.6	28.804	0	323.31	209500000000	1489	sp|P18669|PGAM1_HUMAN;sp|Q8N0Y7|PGAM4_HUMAN;sp|P15259|PGAM2_HUMAN	sp|P18669|PGAM1_HUMAN	sp|P18669|PGAM1_HUMAN Phosphoglycerate mutase 1 OS=Homo sapiens OX=9606 GN=PGAM1 PE=1 SV=2
23.3485	23.4142	24.5291	24.0699	25.7016	24.8471	23.6176	24.3104	26.0076	25.2537	23.8142	25.2545	25.2897	24.5605	24.5205	24.9044	24.1393	NaN	NaN	30.216	24.6093	24.6757	24.478	24.0567				4	4	4	17.3	17.3	17.3	44.969	0	52.835	909970000	30	sp|P18754|RCC1_HUMAN;sp|P18754-2|RCC1_HUMAN	sp|P18754|RCC1_HUMAN;sp|P18754-2|RCC1_HUMAN	sp|P18754|RCC1_HUMAN Regulator of chromosome condensation OS=Homo sapiens OX=9606 GN=RCC1 PE=1 SV=1;sp|P18754-2|RCC1_HUMAN Isoform 2 of Regulator of chromosome condensation OS=Homo sapiens OX=9606 GN=RCC1
28.6172	27.3778	28.639	28.6053	28.7955	28.2147	28.2723	28.0263	28.2957	28.6422	28.6633	28.5603	28.4107	28.369	29.2412	28.4949	28.2687	28.2964	28.15	28.6703	29.0456	27.8378	28.1371	27.9319				12	12	12	25	25	25	97.039	0	222.41	7949500000	264	sp|P19022-2|CADH2_HUMAN;sp|P19022|CADH2_HUMAN;sp|P55283-2|CADH4_HUMAN;sp|P55283|CADH4_HUMAN	sp|P19022-2|CADH2_HUMAN;sp|P19022|CADH2_HUMAN	sp|P19022-2|CADH2_HUMAN Isoform 2 of Cadherin-2 OS=Homo sapiens OX=9606 GN=CDH2;sp|P19022|CADH2_HUMAN Cadherin-2 OS=Homo sapiens OX=9606 GN=CDH2 PE=1 SV=4
27.0292	26.3155	27.3342	27.0133	26.9896	27.2641	26.3409	27.0942	27.2458	26.5848	26.8861	27.2942	26.6734	26.9301	27.7197	26.9938	27.9374	26.397	26.7025	26.5961	26.2717	27.0991	25.9845	27.4994				5	5	5	27	27	27	40.923	0	117.66	3385700000	127	sp|P19086|GNAZ_HUMAN	sp|P19086|GNAZ_HUMAN	sp|P19086|GNAZ_HUMAN Guanine nucleotide-binding protein G(z) subunit alpha OS=Homo sapiens OX=9606 GN=GNAZ PE=1 SV=3
27.6318	27.4004	27.7648	27.7354	27.5376	27.6531	27.3451	27.8315	27.4229	27.2087	27.7193	27.5211	27.4584	27.4101	27.7514	27.9489	25.9572	27.5273	27.5546	27.8897	27.365	27.3963	27.6234	27.6584				18	18	13	49.3	49.3	38	81.243	0	182.5	4577300000	362	sp|P19205|ACPH_PIG	sp|P19205|ACPH_PIG	sp|P19205|ACPH_PIG Acylamino-acid-releasing enzyme OS=Sus scrofa OX=9823 GN=APEH PE=1 SV=2
29.6682	29.7322	28.9722	29.5353	29.3662	29.0332	29.2904	29.5423	30.0447	29.1694	29.3568	29.385	29.0987	28.908	29.2598	29.659	29.5291	29.2591	29.229	29.3087	28.5129	29.4429	29.1839	29.5183				6	6	6	8.5	8.5	8.5	76.613	0	108.52	18752000000	443	sp|P19338|NUCL_HUMAN	sp|P19338|NUCL_HUMAN	sp|P19338|NUCL_HUMAN Nucleolin OS=Homo sapiens OX=9606 GN=NCL PE=1 SV=3
30.7733	31.3401	30.253	31.2224	31.1127	31.1057	30.5191	30.8227	31.1839	30.7775	30.8128	31.2076	31.0614	31.1077	30.5556	30.9043	30.9083	31.2566	30.9751	31.2692	30.5776	31.0708	30.9883	31.4844				16	16	12	26	26	21.4	102.48	0	323.31	54663000000	830	sp|P19367|HXK1_HUMAN;sp|P19367-4|HXK1_HUMAN;sp|P19367-2|HXK1_HUMAN;sp|P19367-3|HXK1_HUMAN;sp|P52790|HXK3_HUMAN	sp|P19367|HXK1_HUMAN;sp|P19367-4|HXK1_HUMAN;sp|P19367-2|HXK1_HUMAN;sp|P19367-3|HXK1_HUMAN	sp|P19367|HXK1_HUMAN Hexokinase-1 OS=Homo sapiens OX=9606 GN=HK1 PE=1 SV=3;sp|P19367-4|HXK1_HUMAN Isoform 4 of Hexokinase-1 OS=Homo sapiens OX=9606 GN=HK1;sp|P19367-2|HXK1_HUMAN Isoform 2 of Hexokinase-1 OS=Homo sapiens OX=9606 GN=HK1;sp|P19367-3|HXK1_HUMA
24.9237	24.9532	24.2382	24.3992	24.7774	25.1879	24.192	25.0412	24.3376	25.1543	24.9661	25.1116	24.9863	24.7301	24.6838	NaN	25.2885	24.7588	23.1585	23.9788	22.5734	25.0433	25.0067	25.2				4	4	4	32.4	32.4	32.4	31.441	0	56.295	587170000	66	sp|P19387|RPB3_HUMAN	sp|P19387|RPB3_HUMAN	sp|P19387|RPB3_HUMAN DNA-directed RNA polymerase II subunit RPB3 OS=Homo sapiens OX=9606 GN=POLR2C PE=1 SV=2
24.3479	23.8802	23.9702	23.546	24.4933	24.533	23.9082	24.1567	24.4869	24.4911	25.1128	24.8562	24.3773	23.7618	25.5822	24.8329	25.2899	24.4491	24.4423	24.48	24.2759	24.1924	24.7661	24.3084				3	3	3	28.6	28.6	28.6	24.551	0	66.192	435440000	43	sp|P19388|RPAB1_HUMAN	sp|P19388|RPAB1_HUMAN	sp|P19388|RPAB1_HUMAN DNA-directed RNA polymerases I, II, and III subunit RPABC1 OS=Homo sapiens OX=9606 GN=POLR2E PE=1 SV=4
28.4886	28.7602	28.3339	29.2233	28.6178	28.4761	28.5026	28.5244	29.1998	28.2056	28.4303	28.6995	28.214	28.911	27.8685	28.507	28.881	28.6906	28.902	29.1605	28.1942	28.9339	28.8146	29.1028				9	9	9	37.8	37.8	37.8	27.391	0	323.31	10060000000	233	sp|P19404|NDUV2_HUMAN	sp|P19404|NDUV2_HUMAN	sp|P19404|NDUV2_HUMAN NADH dehydrogenase [ubiquinone] flavoprotein 2, mitochondrial OS=Homo sapiens OX=9606 GN=NDUFV2 PE=1 SV=2
30.044	27.9204	30.5548	29.6924	28.6826	28.8294	30.1981	28.6551	29.3661	29.6058	29.6913	29.1467	29.124	28.0185	29.7761	28.5199	28.7426	28.2048	28.5405	27.8405	30.129	27.7475	29.5828	28.3346				12	12	12	39.9	39.9	39.9	38.759	0	323.31	13881000000	492	sp|P19619|ANXA1_PIG;sp|P04083|ANXA1_HUMAN	sp|P19619|ANXA1_PIG	sp|P19619|ANXA1_PIG Annexin A1 OS=Sus scrofa OX=9823 GN=ANXA1 PE=1 SV=3
31.1228	29.3692	31.4341	30.9291	30.2646	30.1716	31.456	29.9488	30.1894	30.694	31.0111	30.6861	30.2482	29.0072	30.9067	28.9707	30.6069	29.7196	29.7554	29.278	31.234	29.0154	30.5512	29.6927				13	13	13	48.7	48.7	48.7	38.422	0	323.31	34070000000	433	sp|P19620|ANXA2_PIG;sp|P07355|ANXA2_HUMAN;sp|P07355-2|ANXA2_HUMAN;sp|A6NMY6|AXA2L_HUMAN	sp|P19620|ANXA2_PIG;sp|P07355|ANXA2_HUMAN;sp|P07355-2|ANXA2_HUMAN	sp|P19620|ANXA2_PIG Annexin A2 OS=Sus scrofa OX=9823 GN=ANXA2 PE=1 SV=4;sp|P07355|ANXA2_HUMAN Annexin A2 OS=Homo sapiens OX=9606 GN=ANXA2 PE=1 SV=2;sp|P07355-2|ANXA2_HUMAN Isoform 2 of Annexin A2 OS=Homo sapiens OX=9606 GN=ANXA2
24.4237	23.9433	24.0203	24.887	24.7675	24.7344	24.6666	24.7446	25.2596	25.487	25.0146	25.4539	24.3604	24.7447	25.9459	25.6473	25.3551	23.2763	24.4891	25.1037	24.62	24.7632	25.02	25.254				7	7	7	29.1	29.1	29.1	41.213	0	17.924	815460000	47	sp|P19784|CSK22_HUMAN	sp|P19784|CSK22_HUMAN	sp|P19784|CSK22_HUMAN Casein kinase II subunit alpha OS=Homo sapiens OX=9606 GN=CSNK2A2 PE=1 SV=1
25.9198	25.9432	26.1105	25.8785	24.704	25.1887	26.1973	25.5924	25.1326	25.0212	25.6633	25.4734	25.7995	25.3284	25.4821	25.5982	25.8872	25.5876	25.416	25.7364	26.0137	25.7924	25.401	25.5414				3	3	3	11.1	11.1	11.1	38.388	0	52.617	1229500000	73	sp|P20042|IF2B_HUMAN	sp|P20042|IF2B_HUMAN	sp|P20042|IF2B_HUMAN Eukaryotic translation initiation factor 2 subunit 2 OS=Homo sapiens OX=9606 GN=EIF2S2 PE=1 SV=2
25.6013	25.5849	25.5575	25.8523	23.9925	23.4838	26.677	25.5217	24.6308	25.3064	25.0559	25.7675	25.4423	24.6508	25.1416	NaN	26.2816	24.8862	25.3189	26.1112	25.343	25.5663	25.2272	25.8405				3	3	3	7.1	7.1	7.1	50.315	0	14.007	1261900000	96	sp|P20073-2|ANXA7_HUMAN;sp|P20073|ANXA7_HUMAN	sp|P20073-2|ANXA7_HUMAN;sp|P20073|ANXA7_HUMAN	sp|P20073-2|ANXA7_HUMAN Isoform 2 of Annexin A7 OS=Homo sapiens OX=9606 GN=ANXA7;sp|P20073|ANXA7_HUMAN Annexin A7 OS=Homo sapiens OX=9606 GN=ANXA7 PE=1 SV=3
24.5194	24.7336	25.2834	24.8995	25.3278	25.3106	24.6085	24.8716	24.8641	25.3845	25.6332	25.3731	24.7481	24.4648	24.4128	24.142	25.454	25.1418	24.6765	24.4689	25.174	24.0629	24.4611	24.6372				5	5	5	26.3	26.3	26.3	34.239	0	36.698	661810000	46	sp|P20112|SPRC_PIG;sp|P09486|SPRC_HUMAN	sp|P20112|SPRC_PIG;sp|P09486|SPRC_HUMAN	sp|P20112|SPRC_PIG SPARC OS=Sus scrofa OX=9823 GN=SPARC PE=1 SV=2;sp|P09486|SPRC_HUMAN SPARC OS=Homo sapiens OX=9606 GN=SPARC PE=1 SV=1
24.8896	24.5927	25.0388	24.0331	24.7688	25.0621	24.1984	24.2552	24.7273	25.5754	24.3608	25.4669	24.8675	24.9011	24.7742	25.8098	24.5044	25.2898	24.3911	25.6065	25.2623	24.5442	24.6992	24.3415				4	4	4	48.8	48.8	48.8	17.699	0	39.696	828570000	116	sp|P20290-2|BTF3_HUMAN;sp|P20290|BTF3_HUMAN	sp|P20290-2|BTF3_HUMAN;sp|P20290|BTF3_HUMAN	sp|P20290-2|BTF3_HUMAN Isoform 2 of Transcription factor BTF3 OS=Homo sapiens OX=9606 GN=BTF3;sp|P20290|BTF3_HUMAN Transcription factor BTF3 OS=Homo sapiens OX=9606 GN=BTF3 PE=1 SV=1
31.1331	30.1386	30.7611	30.8193	30.4954	30.4055	31.1606	30.376	30.2158	30.9813	31.1733	30.6688	30.6527	30.2499	31.0392	30.148	30.6451	30.631	30.6672	30.3867	31.5666	29.9554	30.4658	30.0224				19	19	8	54.2	54.2	21.9	80.738	0	323.31	38130000000	698	sp|P20305-2|GELS_PIG;sp|P20305|GELS_PIG	sp|P20305-2|GELS_PIG;sp|P20305|GELS_PIG	sp|P20305-2|GELS_PIG Isoform 2 of Gelsolin OS=Sus scrofa OX=9823 GN=GSN;sp|P20305|GELS_PIG Gelsolin (Fragment) OS=Sus scrofa OX=9823 GN=GSN PE=1 SV=1
29.2405	29.4571	28.3657	29.0849	28.5869	29.1867	28.4517	29.5125	29.1114	28.6923	29.2955	29.5154	29.0481	29.1311	28.8673	28.7269	28.4615	29.3654	29.4844	29.3606	29.1684	30.0712	29.7259	29.7453				5	5	3	40.9	40.9	19.5	24.97	0	323.31	16826000000	310	sp|Q06AU3|RAB3A_PIG;sp|P20336|RAB3A_HUMAN	sp|Q06AU3|RAB3A_PIG;sp|P20336|RAB3A_HUMAN	sp|Q06AU3|RAB3A_PIG Ras-related protein Rab-3A OS=Sus scrofa OX=9823 GN=RAB3A PE=2 SV=1;sp|P20336|RAB3A_HUMAN Ras-related protein Rab-3A OS=Homo sapiens OX=9606 GN=RAB3A PE=1 SV=1
23.0936	22.478	23.5471	22.8704	NaN	24.1585	23.5876	23.3897	23.532	24.5208	23.2134	23.5956	23.8765	24.3324	22.3111	NaN	23.1682	23.4759	23.564	23.5311	22.7732	23.5789	23.5407	23.646				4	4	3	32.6	32.6	26.1	24.389	0	22.313	345770000	61	sp|P20338|RAB4A_HUMAN	sp|P20338|RAB4A_HUMAN	sp|P20338|RAB4A_HUMAN Ras-related protein Rab-4A OS=Homo sapiens OX=9606 GN=RAB4A PE=1 SV=3
28.9867	29.0354	28.7121	28.9379	28.9252	29.1958	28.9559	28.8086	29.2355	29.4224	28.5965	29.0023	29.2928	28.8642	29.0407	28.9917	29.2059	29.5191	28.8761	29.3868	28.8165	28.9636	29.0299	28.9452				7	7	5	56.3	56.3	46	23.747	0	134.5	13228000000	279	sp|Q06AU6|RAB5A_PIG;sp|P20339|RAB5A_HUMAN;sp|P20339-2|RAB5A_HUMAN	sp|Q06AU6|RAB5A_PIG;sp|P20339|RAB5A_HUMAN;sp|P20339-2|RAB5A_HUMAN	sp|Q06AU6|RAB5A_PIG Ras-related protein Rab-5A OS=Sus scrofa OX=9823 GN=RAB5A PE=2 SV=1;sp|P20339|RAB5A_HUMAN Ras-related protein Rab-5A OS=Homo sapiens OX=9606 GN=RAB5A PE=1 SV=2;sp|P20339-2|RAB5A_HUMAN Isoform 2 of Ras-related protein Rab-5A OS=Homo sapi
26.2606	26.5335	NaN	25.6469	26.2382	25.9068	26.5565	25.8695	26.0898	26.3456	NaN	25.4522	26.712	25.1729	26.2591	27.0983	27.0955	26.3957	26.1545	25.651	24.9021	25.5211	25.2254	26.9498				3	3	3	19.1	19.1	19.1	12.059	0	128.49	1751700000	62	sp|P20472|PRVA_HUMAN	sp|P20472|PRVA_HUMAN	sp|P20472|PRVA_HUMAN Parvalbumin alpha OS=Homo sapiens OX=9606 GN=PVALB PE=1 SV=2
27.3699	27.7392	27.2818	26.695	27.5256	27.1581	27.1954	27.2636	27.2307	27.6543	27.625	27.2696	27.6647	27.3491	27.5728	27.922	27.4608	27.318	27.6489	26.8809	28.1403	27.8442	27.1746	27.1505				6	6	6	36.5	36.5	36.5	26.489	0	123.18	3800500000	116	sp|P20618|PSB1_HUMAN	sp|P20618|PSB1_HUMAN	sp|P20618|PSB1_HUMAN Proteasome subunit beta type-1 OS=Homo sapiens OX=9606 GN=PSMB1 PE=1 SV=2
26.4716	25.1974	26.1096	27.5608	28.6196	28.5234	27.199	26.077	26.537	29.7591	27.5572	NaN	28.4977	27.198	27.9778	29.1209	28.1147	28.3933	27.7713	29.0059	26.9855	27.2099	27.6098	26.1684				3	3	3	30.7	30.7	30.7	16.762	0	56.578	5203800000	62	sp|P20674|COX5A_HUMAN	sp|P20674|COX5A_HUMAN	sp|P20674|COX5A_HUMAN Cytochrome c oxidase subunit 5A, mitochondrial OS=Homo sapiens OX=9606 GN=COX5A PE=1 SV=2
30.2532	29.8505	29.904	29.9507	29.7141	29.8544	29.6395	29.7733	30.7252	29.6409	29.5261	29.4966	29.9932	29.4768	29.9338	30.2507	30.5008	30.342	30.1645	30.1119	30.1167	29.7876	29.9948	30.1501				9	9	9	22	22	22	66.408	0	323.31	25782000000	386	sp|P20700|LMNB1_HUMAN	sp|P20700|LMNB1_HUMAN	sp|P20700|LMNB1_HUMAN Lamin-B1 OS=Homo sapiens OX=9606 GN=LMNB1 PE=1 SV=2
29.675	30.2462	29.5812	30.1326	29.8571	29.7158	29.3725	30.5351	30.2815	30.1891	29.5596	30.1372	29.9539	30.1501	30.1002	30.5813	30.4117	30.2667	30.0601	30.3803	29.7105	30.1974	30.5192	30.1308				11	11	11	33.3	33.3	33.3	55.405	0	253.6	35323000000	461	sp|P20839|IMDH1_HUMAN;sp|P20839-3|IMDH1_HUMAN;sp|P20839-7|IMDH1_HUMAN;sp|P20839-5|IMDH1_HUMAN;sp|P20839-6|IMDH1_HUMAN;sp|P20839-2|IMDH1_HUMAN;sp|P20839-4|IMDH1_HUMAN	sp|P20839|IMDH1_HUMAN;sp|P20839-3|IMDH1_HUMAN;sp|P20839-7|IMDH1_HUMAN;sp|P20839-5|IMDH1_HUMAN;sp|P20839-6|IMDH1_HUMAN;sp|P20839-2|IMDH1_HUMAN;sp|P20839-4|IMDH1_HUMAN	sp|P20839|IMDH1_HUMAN Inosine-5-monophosphate dehydrogenase 1 OS=Homo sapiens OX=9606 GN=IMPDH1 PE=1 SV=2;sp|P20839-3|IMDH1_HUMAN Isoform 3 of Inosine-5-monophosphate dehydrogenase 1 OS=Homo sapiens OX=9606 GN=IMPDH1;sp|P20839-7|IMDH1_HUMAN Isoform 7 of
25.8126	25.3585	25.0984	25.3074	24.5311	24.6553	26.2305	25.2126	25.4561	23.2002	24.4257	24.9737	25.0536	25.8819	26.2556	25.7685	24.6844	23.6199	25.3436	24.1227	23.8595	25.2019	23.9662	24.9311				12	12	12	20	20	20	100.4	0	22.185	929770000	106	sp|P20936-2|RASA1_HUMAN;sp|P20936-4|RASA1_HUMAN;sp|P20936|RASA1_HUMAN;sp|P20936-3|RASA1_HUMAN	sp|P20936-2|RASA1_HUMAN;sp|P20936-4|RASA1_HUMAN;sp|P20936|RASA1_HUMAN	sp|P20936-2|RASA1_HUMAN Isoform 2 of Ras GTPase-activating protein 1 OS=Homo sapiens OX=9606 GN=RASA1;sp|P20936-4|RASA1_HUMAN Isoform 4 of Ras GTPase-activating protein 1 OS=Homo sapiens OX=9606 GN=RASA1;sp|P20936|RASA1_HUMAN Ras GTPase-activating protein
31.1289	31.2647	30.6614	30.7537	31.1933	31.4734	30.8406	31.2406	31.4442	31.7228	31.0426	31.2705	31.1057	31.454	31.001	31.7558	31.0614	31.6447	31.0739	31.3788	31.0471	31.4456	31.2805	31.4254				19	19	19	63.2	63.2	63.2	56.5	0	323.31	64539000000	1046	sp|P21281|VATB2_HUMAN;sp|P15313|VATB1_HUMAN	sp|P21281|VATB2_HUMAN	sp|P21281|VATB2_HUMAN V-type proton ATPase subunit B, brain isoform OS=Homo sapiens OX=9606 GN=ATP6V1B2 PE=1 SV=3
28.2541	28.6766	28.1698	27.6287	28.024	28.0577	28.3622	28.6543	28.5127	28.2232	27.6743	27.7683	28.0912	28.262	28.4924	27.5114	28.572	28.1728	28.0508	28.7158	28.7994	28.6614	28.6271	28.6451				14	14	13	42.9	42.9	40.8	43.941	0	323.31	8761200000	392	sp|P21283|VATC1_HUMAN	sp|P21283|VATC1_HUMAN	sp|P21283|VATC1_HUMAN V-type proton ATPase subunit C 1 OS=Homo sapiens OX=9606 GN=ATP6V1C1 PE=1 SV=4
31.1344	30.2208	31.3591	31.2617	30.4843	30.2459	31.2054	30.3972	30.8331	30.9002	31.1041	30.475	30.6128	29.5827	30.9104	29.7054	30.3657	29.8171	30.5216	29.6194	31.3326	29.8948	30.5815	30.157				42	42	37	28.9	28.9	26.3	280.01	0	323.31	37916000000	959	sp|P21333-2|FLNA_HUMAN;sp|P21333|FLNA_HUMAN	sp|P21333-2|FLNA_HUMAN;sp|P21333|FLNA_HUMAN	sp|P21333-2|FLNA_HUMAN Isoform 2 of Filamin-A OS=Homo sapiens OX=9606 GN=FLNA;sp|P21333|FLNA_HUMAN Filamin-A OS=Homo sapiens OX=9606 GN=FLNA PE=1 SV=4
22.2429	24.0373	23.2078	22.7766	23.2063	24.2273	23.5693	23.5804	22.9125	24.0623	22.9209	23.012	23.3673	24.1724	23.6608	23.0502	21.7268	22.0524	24.0278	23.9486	24.925	24.5235	23.373	23.3671				6	6	6	4.1	4.1	4.1	317.03	0	10.307	247620000	41	sp|P21359-2|NF1_HUMAN;sp|P21359-6|NF1_HUMAN;sp|P21359|NF1_HUMAN;sp|P21359-4|NF1_HUMAN;sp|P21359-3|NF1_HUMAN;sp|P21359-5|NF1_HUMAN	sp|P21359-2|NF1_HUMAN;sp|P21359-6|NF1_HUMAN;sp|P21359|NF1_HUMAN;sp|P21359-4|NF1_HUMAN	sp|P21359-2|NF1_HUMAN Isoform 1 of Neurofibromin OS=Homo sapiens OX=9606 GN=NF1;sp|P21359-6|NF1_HUMAN Isoform 6 of Neurofibromin OS=Homo sapiens OX=9606 GN=NF1;sp|P21359|NF1_HUMAN Neurofibromin OS=Homo sapiens OX=9606 GN=NF1 PE=1 SV=2;sp|P21359-4|NF1_HUMAN
28.1963	27.6348	28.2813	28.0758	27.6784	28.1345	27.8322	28.0425	27.6962	28.3819	28.0737	28.2131	28.032	27.5771	27.965	26.838	26.851	27.8219	27.7014	27.1688	28.1381	27.4428	27.761	28.0441				9	9	9	16.4	16.4	16.4	98.398	0	130.61	5049000000	218	sp|P21399|ACOC_HUMAN	sp|P21399|ACOC_HUMAN	sp|P21399|ACOC_HUMAN Cytoplasmic aconitate hydratase OS=Homo sapiens OX=9606 GN=ACO1 PE=1 SV=3
30.584	31.0043	29.964	30.3109	30.242	30.5355	30.1808	30.7321	31.5113	30.2768	30.3266	30.8693	30.4368	30.9733	30.78	31.1205	29.9912	30.8589	30.5254	31.2521	30.5429	30.5227	30.8551	31.0193				14	14	12	44.1	44.1	39.1	47.573	0	323.31	45334000000	540	sp|P21579|SYT1_HUMAN;sp|Q8N9I0|SYT2_HUMAN	sp|P21579|SYT1_HUMAN	sp|P21579|SYT1_HUMAN Synaptotagmin-1 OS=Homo sapiens OX=9606 GN=SYT1 PE=1 SV=1
24.607	24.8621	24.5026	24.6282	25.4592	25.2035	24.1376	24.5095	24.4532	24.7809	23.4939	25.2552	25.5291	24.9061	23.9409	25.3032	24.6514	23.5634	24.7071	24.9387	25.2224	25.1302	24.2143	25.2594				5	5	5	20.2	20.2	20.2	43.122	0	24.72	701990000	95	sp|P21953|ODBB_HUMAN;sp|P21953-2|ODBB_HUMAN	sp|P21953|ODBB_HUMAN;sp|P21953-2|ODBB_HUMAN	sp|P21953|ODBB_HUMAN 2-oxoisovalerate dehydrogenase subunit beta, mitochondrial OS=Homo sapiens OX=9606 GN=BCKDHB PE=1 SV=2;sp|P21953-2|ODBB_HUMAN Isoform 2 of 2-oxoisovalerate dehydrogenase subunit beta, mitochondrial OS=Homo sapiens OX=9606 GN=BCKDHB
22.6574	22.3254	22.0866	24.5607	21.6016	23.5835	23.2494	22.4108	23.9115	25.6433	23.6402	22.9629	23.8938	23.4085	23.5531	NaN	24.0055	23.4551	24.3617	22.3871	NaN	23.6078	23.3484	23.1481				4	4	3	7.6	7.6	5.6	89.42	0	14.972	276610000	28	sp|P22059|OSBP1_HUMAN;sp|Q969R2-4|OSBP2_HUMAN;sp|Q969R2-6|OSBP2_HUMAN;sp|Q969R2-3|OSBP2_HUMAN;sp|Q969R2-2|OSBP2_HUMAN;sp|Q969R2|OSBP2_HUMAN	sp|P22059|OSBP1_HUMAN	sp|P22059|OSBP1_HUMAN Oxysterol-binding protein 1 OS=Homo sapiens OX=9606 GN=OSBP PE=1 SV=1
27.6526	26.4878	26.7288	27.3362	27.6093	27.4424	27.8433	27.459	28.2522	28.0166	26.7575	28.487	28.2777	28.3138	27.9335	27.9967	27.1975	28.3795	27.9608	28.1326	27.2823	27.5862	27.4653	28.0409				5	5	5	41.9	41.9	41.9	24.646	0	323.31	6403400000	165	sp|P80895|PIMT_PIG;sp|P22061|PIMT_HUMAN;sp|P22061-2|PIMT_HUMAN	sp|P80895|PIMT_PIG;sp|P22061|PIMT_HUMAN;sp|P22061-2|PIMT_HUMAN	sp|P80895|PIMT_PIG Protein-L-isoaspartate(D-aspartate) O-methyltransferase OS=Sus scrofa OX=9823 GN=PCMT1 PE=1 SV=3;sp|P22061|PIMT_HUMAN Protein-L-isoaspartate(D-aspartate) O-methyltransferase OS=Homo sapiens OX=9606 GN=PCMT1 PE=1 SV=4;sp|P22061-2|PIMT_HUM
26.5097	26.5955	26.5432	26.026	27.2877	26.6678	26.307	26.5881	26.734	26.4907	26.8181	25.8696	25.6844	26.6773	26.2946	26.6195	25.9765	26.1306	26.5141	27.0878	25.7807	26.8709	26.7211	26.4601				5	5	4	31.8	31.8	28.3	33.784	0	19.621	2665700000	90	sp|P22087|FBRL_HUMAN	sp|P22087|FBRL_HUMAN	sp|P22087|FBRL_HUMAN rRNA 2-O-methyltransferase fibrillarin OS=Homo sapiens OX=9606 GN=FBL PE=1 SV=2
24.4595	24.6057	24.7834	23.8376	24.3015	24.5085	24.8704	24.3195	24.3922	24.7953	25.3164	23.6696	24.0645	25.0176	24.3975	25.3524	24.2671	24.8974	24.5814	24.4391	NaN	24.4358	24.239	23.41				6	6	6	11	11	11	107.77	0	9.9067	604790000	49	sp|P22102|PUR2_HUMAN;sp|P22102-2|PUR2_HUMAN	sp|P22102|PUR2_HUMAN	sp|P22102|PUR2_HUMAN Trifunctional purine biosynthetic protein adenosine-3 OS=Homo sapiens OX=9606 GN=GART PE=1 SV=1
26.3829	25.5373	26.3819	26.6415	25.4031	26.2291	26.0292	26.396	25.9718	26.7145	26.3275	25.9047	25.8944	25.9082	26.2571	26.2074	25.5572	26.3443	25.9466	25.5763	26.1367	26.0659	25.8896	25.7955				6	6	6	18.4	18.4	18.4	47.079	0	58.328	1685800000	165	sp|P22234|PUR6_HUMAN;sp|P22234-2|PUR6_HUMAN	sp|P22234|PUR6_HUMAN;sp|P22234-2|PUR6_HUMAN	sp|P22234|PUR6_HUMAN Multifunctional protein ADE2 OS=Homo sapiens OX=9606 GN=PAICS PE=1 SV=3;sp|P22234-2|PUR6_HUMAN Isoform 2 of Multifunctional protein ADE2 OS=Homo sapiens OX=9606 GN=PAICS
22.5852	23.3805	22.6969	NaN	23.0346	23.7724	23.2559	22.8246	22.6903	23.4202	23.5711	23.2361	22.7694	23.3819	22.7508	22.2607	NaN	24.1759	23.3885	NaN	23.6123	23.9359	22.8637	23.4472				3	3	3	6.8	6.8	6.8	67.795	0.00033613	4.001	261120000	17	sp|P22303|ACES_HUMAN;sp|P22303-3|ACES_HUMAN;sp|P22303-4|ACES_HUMAN;sp|P22303-2|ACES_HUMAN	sp|P22303|ACES_HUMAN;sp|P22303-3|ACES_HUMAN;sp|P22303-4|ACES_HUMAN;sp|P22303-2|ACES_HUMAN	sp|P22303|ACES_HUMAN Acetylcholinesterase OS=Homo sapiens OX=9606 GN=ACHE PE=1 SV=1;sp|P22303-3|ACES_HUMAN Isoform 4 of Acetylcholinesterase OS=Homo sapiens OX=9606 GN=ACHE;sp|P22303-4|ACES_HUMAN Isoform R of Acetylcholinesterase OS=Homo sapiens OX=9606 GN
31.3058	30.8704	30.5842	30.9557	30.8887	31.0722	30.8349	31.0209	31.0769	30.9975	30.9653	31.1276	30.9742	30.8495	30.9017	31.0446	31.0678	31.1998	31.0198	30.8981	31.0772	31.0044	30.9778	30.9303				27	27	27	47.4	47.4	47.4	113.8	0	323.31	54237000000	1045	sp|P22314-2|UBA1_HUMAN;sp|P22314|UBA1_HUMAN	sp|P22314-2|UBA1_HUMAN;sp|P22314|UBA1_HUMAN	sp|P22314-2|UBA1_HUMAN Isoform 2 of Ubiquitin-like modifier-activating enzyme 1 OS=Homo sapiens OX=9606 GN=UBA1;sp|P22314|UBA1_HUMAN Ubiquitin-like modifier-activating enzyme 1 OS=Homo sapiens OX=9606 GN=UBA1 PE=1 SV=3
31.8422	31.8821	31.7038	32.2214	32.0374	31.2817	32.0249	32.0321	32.046	31.3541	31.7596	31.6968	31.9328	32.102	31.548	32.0742	32.0394	32.1373	31.9559	32.1761	31.8141	31.7962	31.7609	32.4145				10	10	10	36.4	36.4	36.4	36.006	0	323.31	110500000000	722	sp|P22626-2|ROA2_HUMAN;sp|P22626|ROA2_HUMAN	sp|P22626-2|ROA2_HUMAN;sp|P22626|ROA2_HUMAN	sp|P22626-2|ROA2_HUMAN Isoform A2 of Heterogeneous nuclear ribonucleoproteins A2/B1 OS=Homo sapiens OX=9606 GN=HNRNPA2B1;sp|P22626|ROA2_HUMAN Heterogeneous nuclear ribonucleoproteins A2/B1 OS=Homo sapiens OX=9606 GN=HNRNPA2B1 PE=1 SV=2
31.0183	31.4247	30.5713	30.8936	31.2333	30.8595	30.9923	31.6324	31.2558	31.4294	31.0365	30.4218	31.3946	31.4891	30.3849	30.872	31.528	31.7664	31.5302	30.4778	30.5368	31.0923	31.0344	31.291				9	9	8	40.6	40.6	36.5	31.54	0	323.31	60315000000	435	sp|P22676|CALB2_HUMAN	sp|P22676|CALB2_HUMAN	sp|P22676|CALB2_HUMAN Calretinin OS=Homo sapiens OX=9606 GN=CALB2 PE=2 SV=2
28.8986	28.6412	27.4476	29.4637	27.981	28.522	28.1844	28.8394	29.0064	27.7108	28.2044	28.7879	28.1507	28.7352	28.1786	27.9664	28.9326	28.1786	29.3901	29.8923	28.8681	28.8896	28.6096	29.1436				2	2	2	6.8	6.8	6.8	48.442	0	186.43	13013000000	119	sp|P22695|QCR2_HUMAN	sp|P22695|QCR2_HUMAN	sp|P22695|QCR2_HUMAN Cytochrome b-c1 complex subunit 2, mitochondrial OS=Homo sapiens OX=9606 GN=UQCRC2 PE=1 SV=3
23.1553	23.8163	24.3251	24.1613	23.556	23.295	23.8473	24.0669	25.1059	23.8826	24.0889	NaN	24.4003	24.0501	23.4593	24.2847	26.6013	26.0021	25.001	23.321	24.8159	25.2594	25.1872	24.5212				3	3	3	13.6	13.6	13.6	33.969	0	7.3973	589160000	46	sp|P23193|TCEA1_HUMAN;sp|P23193-2|TCEA1_HUMAN	sp|P23193|TCEA1_HUMAN	sp|P23193|TCEA1_HUMAN Transcription elongation factor A protein 1 OS=Homo sapiens OX=9606 GN=TCEA1 PE=1 SV=2
29.4518	29.3389	28.777	29.2312	29.4594	30.0196	28.9454	29.0936	29.6024	29.5588	29.3035	29.0834	29.0341	29.318	29.1697	29.7427	29.5099	29.6512	29.5836	29.3899	29.3161	29.6964	29.3412	29.5041				21	21	3	24.2	24.2	4.8	134.71	0	323.31	15300000000	401	sp|P23220|AT2B1_PIG	sp|P23220|AT2B1_PIG	sp|P23220|AT2B1_PIG Plasma membrane calcium-transporting ATPase 1 OS=Sus scrofa OX=9823 GN=ATP2B1 PE=2 SV=1
29.4838	29.9259	30.2952	29.2077	29.6762	29.8834	29.5819	29.9481	29.9328	30.075	30.1469	30.2041	29.9078	29.8537	30.1846	30.9044	30.1319	29.8069	29.8941	29.3957	29.6999	29.6983	29.9284	29.3413				6	6	6	14.7	14.7	14.7	76.149	0	282.64	23251000000	187	sp|P23246|SFPQ_HUMAN;sp|P23246-2|SFPQ_HUMAN	sp|P23246|SFPQ_HUMAN;sp|P23246-2|SFPQ_HUMAN	sp|P23246|SFPQ_HUMAN Splicing factor, proline- and glutamine-rich OS=Homo sapiens OX=9606 GN=SFPQ PE=1 SV=2;sp|P23246-2|SFPQ_HUMAN Isoform Short of Splicing factor, proline- and glutamine-rich OS=Homo sapiens OX=9606 GN=SFPQ
26.4112	25.8845	26.2672	25.2939	26.1109	26.2165	25.7732	25.868	25.9117	26.3166	26.1783	26.7992	24.9948	26.3426	25.7709	22.7603	25.5865	26.2126	25.5385	26.1431	24.9657	25.4118	25.7025	26.212				13	13	13	61.4	61.4	61.4	51.169	0	64.019	1461100000	147	sp|P23258|TBG1_HUMAN;sp|Q9NRH3|TBG2_HUMAN	sp|P23258|TBG1_HUMAN;sp|Q9NRH3|TBG2_HUMAN	sp|P23258|TBG1_HUMAN Tubulin gamma-1 chain OS=Homo sapiens OX=9606 GN=TUBG1 PE=1 SV=2;sp|Q9NRH3|TBG2_HUMAN Tubulin gamma-2 chain OS=Homo sapiens OX=9606 GN=TUBG2 PE=2 SV=1
29.4508	29.1951	27.5436	29.3616	28.4015	28.7714	29.1909	29.8147	28.9038	28.2094	28.5405	29.2889	28.4832	28.1345	29.2287	28.5665	26.772	27.6179	28.9016	27.8509	28.2898	28.6199	28.7235	29.196				5	5	5	26.4	26.4	26.4	23.742	0	240.14	11722000000	184	sp|P23284|PPIB_HUMAN	sp|P23284|PPIB_HUMAN	sp|P23284|PPIB_HUMAN Peptidyl-prolyl cis-trans isomerase B OS=Homo sapiens OX=9606 GN=PPIB PE=1 SV=2
32.8017	33.9221	32.7428	32.6251	33.3683	33.754	33.0967	33.6981	32.5867	32.5951	33.3078	33.2495	33.6961	31.8961	33.1496	28.5922	30.7351	31.4163	32.303	31.9715	31.7146	32.8212	33.1638	33.249				4	4	4	75.5	75.5	75.5	10.546	0	323.31	323450000000	772	sp|P23297|S10A1_HUMAN	sp|P23297|S10A1_HUMAN	sp|P23297|S10A1_HUMAN Protein S100-A1 OS=Homo sapiens OX=9606 GN=S100A1 PE=1 SV=2
24.7167	25.1489	24.4799	24.0888	25.325	24.8269	24.2205	23.8247	24.0223	26.0172	24.4003	24.802	23.9982	24.1565	24.4971	NaN	23.8034	24.6583	24.1723	24.6877	23.4038	24.4156	24.0047	23.8562				6	6	6	17.5	17.5	17.5	53.586	0	62.606	564680000	73	sp|P23368-2|MAOM_HUMAN;sp|P23368|MAOM_HUMAN	sp|P23368-2|MAOM_HUMAN;sp|P23368|MAOM_HUMAN	sp|P23368-2|MAOM_HUMAN Isoform 2 of NAD-dependent malic enzyme, mitochondrial OS=Homo sapiens OX=9606 GN=ME2;sp|P23368|MAOM_HUMAN NAD-dependent malic enzyme, mitochondrial OS=Homo sapiens OX=9606 GN=ME2 PE=1 SV=1
24.3164	24.6263	24.2844	24.8541	25.0899	NaN	24.3443	24.2475	23.5591	24.8313	25.3992	24.4299	24.4464	24.6369	26.0958	24.0299	NaN	NaN	25.1018	24.3469	23.8007	23.9047	24.225	24.3812				5	5	5	6.5	6.5	6.5	112.73	0	12.778	578590000	64	sp|P23378|GCSP_HUMAN	sp|P23378|GCSP_HUMAN	sp|P23378|GCSP_HUMAN Glycine dehydrogenase (decarboxylating), mitochondrial OS=Homo sapiens OX=9606 GN=GLDC PE=1 SV=2
26.4089	25.7057	27.1023	26.6123	25.222	24.879	26.784	26.2254	24.949	26.1385	25.7441	26.5828	25.7279	26.0611	26.4356	25.7503	26.8167	25.6278	25.9274	25.6078	25.9483	25.4926	26.4468	25.4424				5	5	5	18.4	18.4	18.4	48.851	0	64.177	1674700000	114	sp|P23381-2|SYWC_HUMAN;sp|P23381|SYWC_HUMAN	sp|P23381-2|SYWC_HUMAN;sp|P23381|SYWC_HUMAN	sp|P23381-2|SYWC_HUMAN Isoform 2 of Tryptophan--tRNA ligase, cytoplasmic OS=Homo sapiens OX=9606 GN=WARS;sp|P23381|SYWC_HUMAN Tryptophan--tRNA ligase, cytoplasmic OS=Homo sapiens OX=9606 GN=WARS PE=1 SV=2
29.5798	29.961	29.1134	28.9977	28.8338	28.5657	29.4834	29.4724	29.9676	28.431	29.1928	29.4266	29.7362	29.391	28.9163	29.6929	28.8628	29.124	29.322	29.1978	29.0181	29.3219	29.1931	29.4613				10	10	10	49.8	49.8	49.8	26.688	0	95.374	17255000000	230	sp|Q0Z8U2|RS3_PIG;sp|P23396|RS3_HUMAN;sp|P23396-2|RS3_HUMAN	sp|Q0Z8U2|RS3_PIG;sp|P23396|RS3_HUMAN;sp|P23396-2|RS3_HUMAN	sp|Q0Z8U2|RS3_PIG 40S ribosomal protein S3 OS=Sus scrofa OX=9823 GN=RPS3 PE=1 SV=1;sp|P23396|RS3_HUMAN 40S ribosomal protein S3 OS=Homo sapiens OX=9606 GN=RPS3 PE=1 SV=2;sp|P23396-2|RS3_HUMAN Isoform 2 of 40S ribosomal protein S3 OS=Homo sapiens OX=9606 GN
24.4342	26.7928	26.0838	25.1608	25.5084	25.2816	25.9842	24.6295	26.0553	25.2915	25.9126	24.571	25.6461	25.5823	25.0597	NaN	24.5343	25.9757	26.2971	25.9809	25.573	25.4809	25.1482	25.5537				3	3	3	41	41	41	18.884	0	99.035	1430100000	67	sp|P23434|GCSH_HUMAN	sp|P23434|GCSH_HUMAN	sp|P23434|GCSH_HUMAN Glycine cleavage system H protein, mitochondrial OS=Homo sapiens OX=9606 GN=GCSH PE=1 SV=2
25.2495	25.4557	24.6999	24.3263	26.0798	25.3314	24.7794	25.1843	24.8265	25.8391	24.9092	25.3322	25.1553	25.3906	25.5705	26.1486	24.8074	25.2932	25.0566	25.8125	24.7631	25.1189	25.2493	26.0997				13	13	8	11.5	11.5	8	212.13	0	35.224	1058800000	71	sp|P23468-2|PTPRD_HUMAN;sp|P23468|PTPRD_HUMAN;sp|P23468-3|PTPRD_HUMAN;sp|P23468-7|PTPRD_HUMAN;sp|P23468-5|PTPRD_HUMAN;sp|P23468-4|PTPRD_HUMAN;sp|P23468-6|PTPRD_HUMAN	sp|P23468-2|PTPRD_HUMAN;sp|P23468|PTPRD_HUMAN;sp|P23468-3|PTPRD_HUMAN;sp|P23468-7|PTPRD_HUMAN;sp|P23468-5|PTPRD_HUMAN;sp|P23468-4|PTPRD_HUMAN;sp|P23468-6|PTPRD_HUMAN	sp|P23468-2|PTPRD_HUMAN Isoform 2 of Receptor-type tyrosine-protein phosphatase delta OS=Homo sapiens OX=9606 GN=PTPRD;sp|P23468|PTPRD_HUMAN Receptor-type tyrosine-protein phosphatase delta OS=Homo sapiens OX=9606 GN=PTPRD PE=1 SV=2;sp|P23468-3|PTPRD_HUMAN
23.6008	22.0538	NaN	22.8632	21.3842	23.8146	23.5138	23.5509	23.7768	24.2459	22.0507	22.5814	22.6379	24.4248	24.9012	23.731	23.8184	23.6575	24.4319	24.0456	24.1697	23.4079	23.268	23.255				3	3	3	2.8	2.8	2.8	253.67	0	226.4	202120000	22	sp|P23471-2|PTPRZ_HUMAN;sp|P23471|PTPRZ_HUMAN;sp|P23471-3|PTPRZ_HUMAN	sp|P23471-2|PTPRZ_HUMAN;sp|P23471|PTPRZ_HUMAN;sp|P23471-3|PTPRZ_HUMAN	sp|P23471-2|PTPRZ_HUMAN Isoform 2 of Receptor-type tyrosine-protein phosphatase zeta OS=Homo sapiens OX=9606 GN=PTPRZ1;sp|P23471|PTPRZ_HUMAN Receptor-type tyrosine-protein phosphatase zeta OS=Homo sapiens OX=9606 GN=PTPRZ1 PE=1 SV=4;sp|P23471-3|PTPRZ_HUMAN
25.7623	25.6693	26.2193	27.9444	25.6042	24.8553	25.3398	24.6286	24.0664	26.6404	NaN	24.9297	25.6809	25.7421	25.4474	NaN	24.8794	25.5827	25.952	25.5704	25.1139	25.2929	25.1755	25.0648				3	3	3	7.4	7.4	7.4	69.15	0	32.938	792880000	20	sp|P23588|IF4B_HUMAN;sp|P23588-2|IF4B_HUMAN	sp|P23588|IF4B_HUMAN	sp|P23588|IF4B_HUMAN Eukaryotic translation initiation factor 4B OS=Homo sapiens OX=9606 GN=EIF4B PE=1 SV=2
25.2918	24.9571	25.3243	25.2677	25.2743	25.8839	25.6654	25.4161	25.6122	21.1247	25.9433	23.8378	24.9077	25.2378	25.3591	25.3793	26.1624	25.1567	26.5753	25.8007	NaN	25.935	24.9429	24.9818				11	4	4	12.8	5.8	5.8	132.59	0	11.518	1104800000	52	sp|P23634-7|AT2B4_HUMAN;sp|P23634-6|AT2B4_HUMAN;sp|P23634-8|AT2B4_HUMAN;sp|P23634|AT2B4_HUMAN;sp|P23634-5|AT2B4_HUMAN;sp|P23634-4|AT2B4_HUMAN;sp|P23634-3|AT2B4_HUMAN;sp|P23634-2|AT2B4_HUMAN	sp|P23634-7|AT2B4_HUMAN;sp|P23634-6|AT2B4_HUMAN;sp|P23634-8|AT2B4_HUMAN;sp|P23634|AT2B4_HUMAN;sp|P23634-5|AT2B4_HUMAN;sp|P23634-4|AT2B4_HUMAN;sp|P23634-3|AT2B4_HUMAN;sp|P23634-2|AT2B4_HUMAN	sp|P23634-7|AT2B4_HUMAN Isoform ZB of Plasma membrane calcium-transporting ATPase 4 OS=Homo sapiens OX=9606 GN=ATP2B4;sp|P23634-6|AT2B4_HUMAN Isoform XB of Plasma membrane calcium-transporting ATPase 4 OS=Homo sapiens OX=9606 GN=ATP2B4;sp|P23634-8|AT2B4_HU
29.124	28.8531	29.2142	29.3872	29.131	29.4043	28.7727	28.9869	29.4492	29.1325	29.0875	29.1466	29.1133	28.8921	29.2433	29.201	29.1263	28.9821	29.4075	29.2241	28.8959	29.0525	29.1815	28.9974				25	25	25	49.9	49.9	49.9	80.769	0	323.31	13782000000	653	sp|P23687|PPCE_PIG;sp|P48147|PPCE_HUMAN	sp|P23687|PPCE_PIG;sp|P48147|PPCE_HUMAN	sp|P23687|PPCE_PIG Prolyl endopeptidase OS=Sus scrofa OX=9823 GN=PREP PE=1 SV=1;sp|P48147|PPCE_HUMAN Prolyl endopeptidase OS=Homo sapiens OX=9606 GN=PREP PE=1 SV=2
22.363	22.9612	22.7734	21.5287	23.1059	22.0069	22.4536	22.4238	22.0206	22.4706	23.4059	22.2884	21.1355	22.259	22.3638	22.7428	22.0033	22.656	21.6745	NaN	22.9674	22.6344	22.492	22.4201				5	5	5	12.9	12.9	12.9	90.069	0	7.297	134770000	29	sp|P23921|RIR1_HUMAN	sp|P23921|RIR1_HUMAN	sp|P23921|RIR1_HUMAN Ribonucleoside-diphosphate reductase large subunit OS=Homo sapiens OX=9606 GN=RRM1 PE=1 SV=1
26.6274	27.5524	26.5826	26.3792	26.3248	26.8187	26.4614	27.6262	27.4277	27.5622	27.1143	26.4893	27.118	27.2777	26.7112	27.6284	26.807	26.8719	27.4403	28.3299	25.6003	27.9157	26.715	27.5395				3	3	3	9	9	9	39.186	0	147.94	4509400000	215	sp|P23942|PRPH2_HUMAN	sp|P23942|PRPH2_HUMAN	sp|P23942|PRPH2_HUMAN Peripherin-2 OS=Homo sapiens OX=9606 GN=PRPH2 PE=1 SV=1
29.1227	29.2308	29.2879	29.5431	29.8326	29.6347	28.7279	28.9537	29.5746	29.2809	29.8606	30.1871	29.2124	29.0527	28.8089	28.6245	28.3814	29.1777	28.8076	28.4959	28.7605	28.7354	29.0008	29.2793				6	6	6	37.8	37.8	37.8	24.763	0	211.66	13662000000	136	sp|P24534|EF1B_HUMAN;sp|P29412|EF1B_PIG	sp|P24534|EF1B_HUMAN	sp|P24534|EF1B_HUMAN Elongation factor 1-beta OS=Homo sapiens OX=9606 GN=EEF1B2 PE=1 SV=3
25.3454	26.0758	25.5625	26.9485	25.3929	25.8499	25.0563	26.5046	26.1328	26.2485	25.8059	26.6518	25.584	25.7115	24.9764	26.2048	24.785	24.5466	27.1635	26.8961	NaN	26.0986	25.572	26.5313				2	2	2	19.1	19.1	19.1	17.175	0	117.71	1456500000	44	sp|P24752-2|THIL_HUMAN;sp|P24752|THIL_HUMAN	sp|P24752-2|THIL_HUMAN;sp|P24752|THIL_HUMAN	sp|P24752-2|THIL_HUMAN Isoform 2 of Acetyl-CoA acetyltransferase, mitochondrial OS=Homo sapiens OX=9606 GN=ACAT1;sp|P24752|THIL_HUMAN Acetyl-CoA acetyltransferase, mitochondrial OS=Homo sapiens OX=9606 GN=ACAT1 PE=1 SV=1
25.8793	25.0986	25.8324	25.8852	25.9801	25.6105	25.5591	26.3114	25.351	25.9009	25.3739	25.5605	25.5573	24.9986	26.1942	24.622	25.4948	25.5231	25.1952	25.3726	25.794	25.3366	25.7742	25.6489				10	10	10	10.5	10.5	10.5	217.17	0	241.84	1156300000	149	sp|P24928|RPB1_HUMAN;sp|P24928-2|RPB1_HUMAN	sp|P24928|RPB1_HUMAN	sp|P24928|RPB1_HUMAN DNA-directed RNA polymerase II subunit RPB1 OS=Homo sapiens OX=9606 GN=POLR2A PE=1 SV=2
28.4631	28.7307	29.3816	28.539	28.6084	28.5461	28.6823	29.1705	29.6288	28.1086	28.5125	28.1258	28.7482	29.0163	28.1713	29.3482	29.61	28.5181	29.4723	28.3895	28.6958	28.8604	29.34	28.876				4	4	4	40.9	40.9	40.9	14.515	0	323.31	12408000000	169	sp|P46405|RS12_PIG;sp|P25398|RS12_HUMAN	sp|P46405|RS12_PIG;sp|P25398|RS12_HUMAN	sp|P46405|RS12_PIG 40S ribosomal protein S12 OS=Sus scrofa OX=9823 GN=RPS12 PE=2 SV=2;sp|P25398|RS12_HUMAN 40S ribosomal protein S12 OS=Homo sapiens OX=9606 GN=RPS12 PE=1 SV=3
25.5894	25.7057	25.3251	25.8857	25.4391	25.5101	25.9196	25.6154	NaN	25.6912	26.0382	25.527	25.768	25.5583	25.1958	25.626	26.2315	26.2089	25.7766	25.3797	26.4056	25.8438	25.4966	25.7657				5	5	4	20.3	20.3	16.8	38.044	0	40.965	1206400000	100	sp|P25685|DNJB1_HUMAN;sp|P25685-2|DNJB1_HUMAN	sp|P25685|DNJB1_HUMAN;sp|P25685-2|DNJB1_HUMAN	sp|P25685|DNJB1_HUMAN DnaJ homolog subfamily B member 1 OS=Homo sapiens OX=9606 GN=DNAJB1 PE=1 SV=4;sp|P25685-2|DNJB1_HUMAN Isoform 2 of DnaJ homolog subfamily B member 1 OS=Homo sapiens OX=9606 GN=DNAJB1
24.7317	25.3626	24.5673	22.5378	24.8441	25.8518	24.9043	25.2448	24.3512	25.4751	25.3095	24.6891	24.6393	25.1334	24.9976	24.3958	20.9591	NaN	NaN	24.6573	25.3457	24.4499	24.7519	24.9658				3	3	3	17.3	17.3	17.3	30.568	0	232.03	829610000	73	sp|P25686-2|DNJB2_HUMAN;sp|P25686|DNJB2_HUMAN	sp|P25686-2|DNJB2_HUMAN;sp|P25686|DNJB2_HUMAN	sp|P25686-2|DNJB2_HUMAN Isoform 2 of DnaJ homolog subfamily B member 2 OS=Homo sapiens OX=9606 GN=DNAJB2;sp|P25686|DNJB2_HUMAN DnaJ homolog subfamily B member 2 OS=Homo sapiens OX=9606 GN=DNAJB2 PE=1 SV=3
27.3021	27.1248	27.937	27.6232	28.0354	27.535	27.5657	27.262	27.9092	27.4395	28.1873	27.9959	27.6186	27.0029	27.5042	26.4816	27.6625	27.4536	27.5738	27.4612	27.7075	27.332	27.2477	27.5321				6	6	6	44.9	44.9	44.9	29.555	0	143.37	4306700000	169	sp|P25786|PSA1_HUMAN;sp|P25786-2|PSA1_HUMAN	sp|P25786|PSA1_HUMAN;sp|P25786-2|PSA1_HUMAN	sp|P25786|PSA1_HUMAN Proteasome subunit alpha type-1 OS=Homo sapiens OX=9606 GN=PSMA1 PE=1 SV=1;sp|P25786-2|PSA1_HUMAN Isoform Long of Proteasome subunit alpha type-1 OS=Homo sapiens OX=9606 GN=PSMA1
27.8692	27.9349	27.9411	27.4146	27.4407	27.5631	27.6729	27.6859	27.2589	27.4613	27.2918	27.8535	26.8439	27.3856	27.798	26.3724	27.6495	27.3465	27.5368	27.4012	27.855	27.6815	27.2054	27.6025				5	5	5	38	38	38	25.898	0	58.258	4288000000	201	sp|P25787|PSA2_HUMAN	sp|P25787|PSA2_HUMAN	sp|P25787|PSA2_HUMAN Proteasome subunit alpha type-2 OS=Homo sapiens OX=9606 GN=PSMA2 PE=1 SV=2
26.1848	26.4418	26.3443	26.9904	26.3765	27.0412	25.9402	26.3285	26.689	26.4393	26.4215	26.0262	26.6716	26.1904	25.8474	27.2989	26.2509	26.3052	26.0764	25.8033	26.5692	26.6296	26.4175	26.5882				4	4	4	21	21	21	27.647	0	26.825	2423600000	89	sp|P25788-2|PSA3_HUMAN;sp|P25788|PSA3_HUMAN	sp|P25788-2|PSA3_HUMAN;sp|P25788|PSA3_HUMAN	sp|P25788-2|PSA3_HUMAN Isoform 2 of Proteasome subunit alpha type-3 OS=Homo sapiens OX=9606 GN=PSMA3;sp|P25788|PSA3_HUMAN Proteasome subunit alpha type-3 OS=Homo sapiens OX=9606 GN=PSMA3 PE=1 SV=2
27.4023	27.8064	27.6863	27.66	27.721	28.0323	27.7952	27.2384	28.3782	27.8471	28.5617	27.5466	27.5517	27.5899	27.2892	26.7432	27.9001	27.5337	27.4233	27.7723	27.6572	26.9607	27.4447	26.8364				7	7	7	52.5	52.5	52.5	29.483	0	139.21	4701400000	163	sp|P25789|PSA4_HUMAN;sp|P25789-2|PSA4_HUMAN	sp|P25789|PSA4_HUMAN;sp|P25789-2|PSA4_HUMAN	sp|P25789|PSA4_HUMAN Proteasome subunit alpha type-4 OS=Homo sapiens OX=9606 GN=PSMA4 PE=1 SV=1;sp|P25789-2|PSA4_HUMAN Isoform 2 of Proteasome subunit alpha type-4 OS=Homo sapiens OX=9606 GN=PSMA4
22.8163	23.1319	23.096	21.9925	23.9474	23.0262	22.6861	22.6689	22.4362	22.8514	23.0671	22.4438	23.0108	22.677	22.7371	NaN	23.0209	22.0747	22.2276	22.107	23.1653	22.2746	22.6817	22.1316				3	3	3	7.6	7.6	7.6	71.283	0.00064914	3.5555	136020000	23	sp|P26012-2|ITB8_HUMAN;sp|P26012|ITB8_HUMAN	sp|P26012-2|ITB8_HUMAN;sp|P26012|ITB8_HUMAN	sp|P26012-2|ITB8_HUMAN Isoform 2 of Integrin beta-8 OS=Homo sapiens OX=9606 GN=ITGB8;sp|P26012|ITB8_HUMAN Integrin beta-8 OS=Homo sapiens OX=9606 GN=ITGB8 PE=2 SV=1
29.4773	28.7002	29.0276	29.0983	28.6258	28.0093	29.7156	28.7033	28.3937	29.1041	28.7588	29.3656	29.1973	28.6326	29.0825	28.8987	28.5526	27.9265	28.2814	28.5284	29.3577	28.4414	28.6854	28.3402				14	14	8	29.8	29.8	20.5	67.819	0	281.87	11953000000	363	sp|P26038|MOES_HUMAN;sp|P26042|MOES_PIG	sp|P26038|MOES_HUMAN;sp|P26042|MOES_PIG	sp|P26038|MOES_HUMAN Moesin OS=Homo sapiens OX=9606 GN=MSN PE=1 SV=3;sp|P26042|MOES_PIG Moesin OS=Sus scrofa OX=9823 GN=MSN PE=2 SV=3
26.6134	26.1403	26.8601	26.6894	25.4136	26.5275	26.4385	26.141	25.3329	26.6432	26.8266	26.8496	26.5993	26.6088	27.084	27.0924	26.3925	25.9494	26.8362	26.7286	26.8982	26.0953	26.2693	26.1848				12	6	6	26.4	17.2	17.2	68.563	0	242.98	2155600000	206	sp|P35241|RADI_HUMAN;sp|P26044|RADI_PIG;sp|P35241-5|RADI_HUMAN;sp|P35241-4|RADI_HUMAN;sp|P35241-3|RADI_HUMAN;sp|P35241-2|RADI_HUMAN	sp|P35241|RADI_HUMAN;sp|P26044|RADI_PIG;sp|P35241-5|RADI_HUMAN;sp|P35241-4|RADI_HUMAN	sp|P35241|RADI_HUMAN Radixin OS=Homo sapiens OX=9606 GN=RDX PE=1 SV=1;sp|P26044|RADI_PIG Radixin OS=Sus scrofa OX=9823 GN=RDX PE=2 SV=1;sp|P35241-5|RADI_HUMAN Isoform 5 of Radixin OS=Homo sapiens OX=9606 GN=RDX;sp|P35241-4|RADI_HUMAN Isoform 4 of Radixin O
27.2959	27.4618	27.7652	27.5513	28.4837	27.6048	27.6281	27.3853	28.163	27.6996	27.6342	27.8412	27.7913	28.0293	27.2983	27.6877	27.4161	27.5782	27.5258	27.6611	27.2474	27.7836	27.9474	27.4916				12	12	12	36.2	36.2	36.2	54.416	0	323.31	5884200000	260	sp|P26196|DDX6_HUMAN	sp|P26196|DDX6_HUMAN	sp|P26196|DDX6_HUMAN Probable ATP-dependent RNA helicase DDX6 OS=Homo sapiens OX=9606 GN=DDX6 PE=1 SV=2
26.5699	26.9957	26.2767	26.6002	26.7542	27.6051	26.5944	26.9267	27.2432	27.4786	27.3972	27.0851	27.387	27.3641	26.9037	23.6132	26.8953	27.5289	27.0923	26.9659	27.3147	26.6184	26.8381	27.2552				19	15	15	36.6	30.9	30.9	100.45	0	161.06	3130900000	236	sp|P26232-2|CTNA2_HUMAN;sp|P26232-5|CTNA2_HUMAN;sp|P26232|CTNA2_HUMAN;sp|P26232-3|CTNA2_HUMAN;sp|P26232-4|CTNA2_HUMAN;sp|P26232-6|CTNA2_HUMAN	sp|P26232-2|CTNA2_HUMAN;sp|P26232-5|CTNA2_HUMAN;sp|P26232|CTNA2_HUMAN;sp|P26232-3|CTNA2_HUMAN	sp|P26232-2|CTNA2_HUMAN Isoform 2 of Catenin alpha-2 OS=Homo sapiens OX=9606 GN=CTNNA2;sp|P26232-5|CTNA2_HUMAN Isoform 5 of Catenin alpha-2 OS=Homo sapiens OX=9606 GN=CTNNA2;sp|P26232|CTNA2_HUMAN Catenin alpha-2 OS=Homo sapiens OX=9606 GN=CTNNA2 PE=1 SV=5;
29.0146	29.0503	29.263	29.3169	28.5131	28.9489	28.552	28.7283	28.8421	28.8288	28.623	28.951	28.8271	29.0724	28.5296	29.0189	28.6991	28.7143	28.7532	28.8575	28.898	28.6909	28.8846	28.7927				12	12	12	44.8	44.8	44.8	53.12	0	323.31	12789000000	526	sp|P26368-2|U2AF2_HUMAN;sp|P26368|U2AF2_HUMAN	sp|P26368-2|U2AF2_HUMAN;sp|P26368|U2AF2_HUMAN	sp|P26368-2|U2AF2_HUMAN Isoform 2 of Splicing factor U2AF 65 kDa subunit OS=Homo sapiens OX=9606 GN=U2AF2;sp|P26368|U2AF2_HUMAN Splicing factor U2AF 65 kDa subunit OS=Homo sapiens OX=9606 GN=U2AF2 PE=1 SV=4
25.4825	24.4384	24.82	26.6047	26.431	26.4313	25.067	23.9213	24.6168	26.1929	26.2045	25.8051	25.5854	25.9801	25.5268	25.1669	26.2112	25.3371	25.3863	25.6607	25.951	25.2049	25.4872	24.6903				4	4	4	21.1	21.1	21.1	42.724	0	142.74	1149200000	91	sp|P26440-2|IVD_HUMAN;sp|P26440|IVD_HUMAN	sp|P26440-2|IVD_HUMAN;sp|P26440|IVD_HUMAN	sp|P26440-2|IVD_HUMAN Isoform 2 of Isovaleryl-CoA dehydrogenase, mitochondrial OS=Homo sapiens OX=9606 GN=IVD;sp|P26440|IVD_HUMAN Isovaleryl-CoA dehydrogenase, mitochondrial OS=Homo sapiens OX=9606 GN=IVD PE=1 SV=1
27.1722	27.3603	26.2137	26.8865	26.1931	26.7278	27.7669	27.3096	27.8327	26.4864	27.0403	26.9721	26.8369	26.8841	26.2879	27.2192	27.9947	27.7594	27.1879	27.2645	25.985	26.9468	26.7791	26.5958				9	9	8	15.9	15.9	14.8	83.434	0	98.426	3833400000	173	sp|P26639|SYTC_HUMAN;sp|P26639-2|SYTC_HUMAN	sp|P26639|SYTC_HUMAN;sp|P26639-2|SYTC_HUMAN	sp|P26639|SYTC_HUMAN Threonine--tRNA ligase, cytoplasmic OS=Homo sapiens OX=9606 GN=TARS PE=1 SV=3;sp|P26639-2|SYTC_HUMAN Isoform 2 of Threonine--tRNA ligase, cytoplasmic OS=Homo sapiens OX=9606 GN=TARS
27.3846	27.263	27.7918	27.96	27.4894	28.0094	27.139	27.2695	27.8165	28.1097	27.805	27.7757	27.4693	27.7909	27.5452	28.2731	27.8582	27.5805	27.8176	27.7585	27.814	27.2713	27.6987	27.5895				10	10	10	15	15	15	140.47	0	94.066	4907200000	239	sp|P26640|SYVC_HUMAN;sp|P26640-2|SYVC_HUMAN	sp|P26640|SYVC_HUMAN	sp|P26640|SYVC_HUMAN Valine--tRNA ligase OS=Homo sapiens OX=9606 GN=VARS PE=1 SV=4
27.6076	27.025	27.3145	26.9932	27.027	27.1901	27.2077	27.2654	27.3763	27.5925	27.4245	26.9775	26.8461	27.5592	27.0778	27.2538	27.5078	27.5923	27.4298	27.6503	28.019	27.1479	26.9475	27.404				4	4	4	48.6	48.6	48.6	15.649	0	34.711	4338500000	199	sp|P26885|FKBP2_HUMAN	sp|P26885|FKBP2_HUMAN	sp|P26885|FKBP2_HUMAN Peptidyl-prolyl cis-trans isomerase FKBP2 OS=Homo sapiens OX=9606 GN=FKBP2 PE=1 SV=2
23.7986	22.5224	23.0315	22.9343	23.5596	24.0737	23.045	22.624	23.8904	24.0867	22.8361	22.1754	23.2952	23.1967	24.1598	24.0698	24.1874	24.335	21.3974	23.9487	24.4851	23.645	23.4852	23.1115				3	3	3	11.3	11.3	11.3	40.633	0.0003499	4.5953	292840000	31	sp|P26992|CNTFR_HUMAN	sp|P26992|CNTFR_HUMAN	sp|P26992|CNTFR_HUMAN Ciliary neurotrophic factor receptor subunit alpha OS=Homo sapiens OX=9606 GN=CNTFR PE=1 SV=2
25.1327	24.4047	25.4646	23.967	24.5326	24.2534	24.9198	24.324	24.4586	24.8991	24.9025	24.5628	24.6633	24.0977	24.812	24.9893	24.3231	23.9664	24.9216	23.6108	25.5226	23.7875	24.69	23.9098				4	4	4	21.9	21.9	21.9	31.73	0	213.82	555880000	74	sp|P27105|STOM_HUMAN;sp|P27105-2|STOM_HUMAN	sp|P27105|STOM_HUMAN;sp|P27105-2|STOM_HUMAN	sp|P27105|STOM_HUMAN Erythrocyte band 7 integral membrane protein OS=Homo sapiens OX=9606 GN=STOM PE=1 SV=3;sp|P27105-2|STOM_HUMAN Isoform 2 of Erythrocyte band 7 integral membrane protein OS=Homo sapiens OX=9606 GN=STOM
30.0025	30.2206	30.2084	30.6229	30.1295	30.1845	29.7723	30.1831	29.9251	30.4089	30.3262	30.1923	30.0209	30.281	30.2309	30.1006	30.3755	30.1968	30.0746	30.3399	30.2582	29.4395	29.8301	29.7619				11	7	7	58.8	49	49	27.764	0	323.31	25556000000	362	sp|P27348|1433T_HUMAN;sp|P31947-2|1433S_HUMAN;sp|P31947|1433S_HUMAN	sp|P27348|1433T_HUMAN	sp|P27348|1433T_HUMAN 14-3-3 protein theta OS=Homo sapiens OX=9606 GN=YWHAQ PE=1 SV=1
26.5773	25.4412	28.04	27.3577	26.1802	26.0349	26.4294	25.6365	25.992	26.6328	26.6167	26.5005	26.8837	26.0789	25.9967	NaN	27.1401	26.4577	25.9033	25.3986	26.5806	26.023	26.194	26.5491				6	4	4	35.6	24.6	24.6	40.088	0	9.9401	2437000000	37	sp|P27361-3|MK03_HUMAN;sp|P27361|MK03_HUMAN;sp|P27361-2|MK03_HUMAN	sp|P27361-3|MK03_HUMAN;sp|P27361|MK03_HUMAN;sp|P27361-2|MK03_HUMAN	sp|P27361-3|MK03_HUMAN Isoform 3 of Mitogen-activated protein kinase 3 OS=Homo sapiens OX=9606 GN=MAPK3;sp|P27361|MK03_HUMAN Mitogen-activated protein kinase 3 OS=Homo sapiens OX=9606 GN=MAPK3 PE=1 SV=4;sp|P27361-2|MK03_HUMAN Isoform 2 of Mitogen-activated
24.9727	24.4748	23.1696	NaN	23.7097	24.2574	23.8334	23.7217	23.803	24.5835	23.5883	22.931	23.9686	24.8	25.3143	NaN	NaN	24.1905	24.0863	21.0116	23.8156	24.0515	23.8675	24.7647				4	4	4	8.3	8.3	8.3	79.875	0	13.835	455400000	50	sp|P27448-6|MARK3_HUMAN;sp|P27448-3|MARK3_HUMAN;sp|P27448-4|MARK3_HUMAN;sp|P27448-2|MARK3_HUMAN;sp|P27448|MARK3_HUMAN;sp|P27448-7|MARK3_HUMAN;sp|Q7KZI7-10|MARK2_HUMAN;sp|Q7KZI7-13|MARK2_HUMAN;sp|Q7KZI7-7|MARK2_HUMAN;sp|Q7KZI7-2|MARK2_HUMAN;sp|Q7KZI7-15|MARK2_HUMAN;sp|Q7KZI7-5|MARK2_HUMAN;sp|Q7KZI7-16|MARK2_HUMAN;sp|Q7KZI7-4|MARK2_HUMAN;sp|Q7KZI7-9|MARK2_HUMAN;sp|Q7KZI7-12|MARK2_HUMAN;sp|Q7KZI7-14…	sp|P27448-6|MARK3_HUMAN;sp|P27448-3|MARK3_HUMAN;sp|P27448-4|MARK3_HUMAN;sp|P27448-2|MARK3_HUMAN;sp|P27448|MARK3_HUMAN;sp|P27448-7|MARK3_HUMAN;sp|Q7KZI7-10|MARK2_HUMAN;sp|Q7KZI7-13|MARK2_HUMAN;sp|Q7KZI7-7|MARK2_HUMAN;sp|Q7KZI7-2|MARK2_HUMAN;sp|Q7KZI7-15|MARK2_HUMAN;sp|Q7KZI7-5|MARK2_HUMAN;sp|Q7KZI7-16|MARK2_HUMAN;sp|Q7KZI7-4|MARK2_HUMAN;sp|Q7KZI7-9|MARK2_HUMAN;sp|Q7KZI7-12|MARK2_HUMAN;sp|Q7KZI7-14…	sp|P27448-6|MARK3_HUMAN Isoform 5 of MAP/microtubule affinity-regulating kinase 3 OS=Homo sapiens OX=9606 GN=MARK3;sp|P27448-3|MARK3_HUMAN Isoform 3 of MAP/microtubule affinity-regulating kinase 3 OS=Homo sapiens OX=9606 GN=MARK3;sp|P27448-4|MARK3_HUMAN Is
29.5099	26.4573	29.4632	24.3076	28.6528	28.0416	30.3409	25.9606	27.6055	22.4259	29.3912	28.7259	28.3804	28.4395	28.8163	25.5318	23.906	23.5323	24.6733	25.4734	29.2346	27.4015	27.3606	26.5172				21	21	20	53.1	53.1	53.1	75.586	0	323.31	7526100000	245	sp|P27594|MX1_PIG;sp|P20591|MX1_HUMAN;sp|P20591-2|MX1_HUMAN;sp|P20592-2|MX2_HUMAN;sp|P20592|MX2_HUMAN	sp|P27594|MX1_PIG	sp|P27594|MX1_PIG Interferon-induced GTP-binding protein Mx1 OS=Sus scrofa OX=9823 GN=MX1 PE=2 SV=1
28.8905	28.8789	29.8863	29.2976	29.3156	29.3075	29.3083	29.7429	28.9002	29.062	29.0759	29.1143	29.1784	28.9562	28.8108	28.6733	28.9553	28.8206	29.177	29.5832	28.9762	29.1916	29.1102	28.8315				10	10	10	40.6	40.6	40.6	35.554	0	201.64	12653000000	172	sp|P27695|APEX1_HUMAN	sp|P27695|APEX1_HUMAN	sp|P27695|APEX1_HUMAN DNA-(apurinic or apyrimidinic site) lyase OS=Homo sapiens OX=9606 GN=APEX1 PE=1 SV=2
25.8647	25.8319	25.9531	25.7526	26.0084	26.0128	26.1483	25.6206	25.8256	25.9548	26.0205	25.3783	25.2955	24.389	25.9127	24.1958	25.5673	25.1397	24.7864	24.8992	26.0048	25.8737	25.3252	25.0551				18	18	18	13	13	13	242.98	0	33.64	1278700000	187	sp|P27708|PYR1_HUMAN	sp|P27708|PYR1_HUMAN	sp|P27708|PYR1_HUMAN CAD protein OS=Homo sapiens OX=9606 GN=CAD PE=1 SV=3
25.9595	25.8101	25.422	25.7089	24.7828	23.8277	26.2076	24.1372	25.4609	24.2386	24.7949	25.2229	23.4485	26.7814	26.6044	NaN	25.6701	24.6654	24.3152	24.7546	NaN	24.932	25.1651	24.2861				3	3	3	4.8	4.8	4.8	102.9	0	129.07	1100300000	52	sp|P27816-2|MAP4_HUMAN;sp|P27816|MAP4_HUMAN;sp|P27816-7|MAP4_HUMAN;sp|P27816-5|MAP4_HUMAN;sp|P27816-6|MAP4_HUMAN;sp|P27816-4|MAP4_HUMAN	sp|P27816-2|MAP4_HUMAN;sp|P27816|MAP4_HUMAN;sp|P27816-7|MAP4_HUMAN;sp|P27816-5|MAP4_HUMAN;sp|P27816-6|MAP4_HUMAN	sp|P27816-2|MAP4_HUMAN Isoform 2 of Microtubule-associated protein 4 OS=Homo sapiens OX=9606 GN=MAP4;sp|P27816|MAP4_HUMAN Microtubule-associated protein 4 OS=Homo sapiens OX=9606 GN=MAP4 PE=1 SV=3;sp|P27816-7|MAP4_HUMAN Isoform 7 of Microtubule-associated
30.9488	30.788	30.1835	30.5625	30.6417	30.1801	30.689	29.4369	29.9814	30.7123	30.2543	29.8606	30.6025	29.9807	30.9137	30.9622	30.5715	30.273	30.4419	30.6545	30.5058	29.9961	29.9718	30.5374				7	7	7	20.6	20.6	20.6	67.567	0	65.556	39629000000	273	sp|P27824|CALX_HUMAN;sp|P27824-2|CALX_HUMAN;sp|P27824-3|CALX_HUMAN	sp|P27824|CALX_HUMAN;sp|P27824-2|CALX_HUMAN;sp|P27824-3|CALX_HUMAN	sp|P27824|CALX_HUMAN Calnexin OS=Homo sapiens OX=9606 GN=CANX PE=1 SV=2;sp|P27824-2|CALX_HUMAN Isoform 2 of Calnexin OS=Homo sapiens OX=9606 GN=CANX;sp|P27824-3|CALX_HUMAN Isoform 3 of Calnexin OS=Homo sapiens OX=9606 GN=CANX
27.5592	27.2848	28.5746	28.0058	27.81	27.4369	27.7794	27.7166	28.6488	27.4701	27.5145	28.1302	27.0274	27.2266	27.6759	27.8237	27.0445	27.3682	27.4356	26.5467	27.7102	27.8492	27.5653	27.3854				7	7	3	48.1	48.1	18.7	26.411	0	203.74	6380000000	213	sp|P28066|PSA5_HUMAN	sp|P28066|PSA5_HUMAN	sp|P28066|PSA5_HUMAN Proteasome subunit alpha type-5 OS=Homo sapiens OX=9606 GN=PSMA5 PE=1 SV=3
26.5654	26.3941	25.9709	24.6694	24.4724	27.4796	26.3847	26.7231	26.7286	24.014	24.0217	28.0423	26.2588	26.1639	25.4532	25.2305	27.6636	26.3503	26.0448	NaN	27.1183	26.8539	25.3376	26.6021				2	2	2	20.5	20.5	20.5	25.357	0	8.7406	1762700000	55	sp|P28072|PSB6_HUMAN	sp|P28072|PSB6_HUMAN	sp|P28072|PSB6_HUMAN Proteasome subunit beta type-6 OS=Homo sapiens OX=9606 GN=PSMB6 PE=1 SV=4
24.7718	24.0706	24.0878	24.4855	24.6566	24.9116	23.8569	24.4557	24.3353	25.6973	24.057	24.6085	24.324	24.5179	24.3369	24.9215	24.9928	24.5454	25.3233	24.9204	23.6805	24.6534	24.7278	24.1774				3	3	3	23.2	23.2	23.2	28.48	0	23.484	883450000	156	sp|P28074|PSB5_HUMAN;sp|P28074-3|PSB5_HUMAN;sp|P28074-2|PSB5_HUMAN	sp|P28074|PSB5_HUMAN;sp|P28074-3|PSB5_HUMAN	sp|P28074|PSB5_HUMAN Proteasome subunit beta type-5 OS=Homo sapiens OX=9606 GN=PSMB5 PE=1 SV=3;sp|P28074-3|PSB5_HUMAN Isoform 3 of Proteasome subunit beta type-5 OS=Homo sapiens OX=9606 GN=PSMB5
24.5471	24.2417	24.7617	23.7738	24.6198	24.6862	24.2823	24.7132	24.8561	25.1067	25.2102	24.678	24.7067	24.3282	23.434	23.6614	24.646	24.1476	24.6208	24.1758	24.6242	24.4249	24.1734	24.1813				4	4	4	10.7	10.7	10.7	62.725	0	37.75	666170000	91	sp|P28288-2|ABCD3_HUMAN;sp|P28288|ABCD3_HUMAN;sp|P28288-3|ABCD3_HUMAN	sp|P28288-2|ABCD3_HUMAN;sp|P28288|ABCD3_HUMAN;sp|P28288-3|ABCD3_HUMAN	sp|P28288-2|ABCD3_HUMAN Isoform 2 of ATP-binding cassette sub-family D member 3 OS=Homo sapiens OX=9606 GN=ABCD3;sp|P28288|ABCD3_HUMAN ATP-binding cassette sub-family D member 3 OS=Homo sapiens OX=9606 GN=ABCD3 PE=1 SV=1;sp|P28288-3|ABCD3_HUMAN Isoform 3 o
28.9649	29.4002	28.401	29.3252	29.2857	29.4728	28.9638	29.573	30.7325	29.4315	28.7895	29.2738	29.3106	29.6737	28.7496	29.4284	29.8772	29.3194	29.7775	29.6444	27.9944	29.569	29.2134	29.8052				11	11	11	23.1	23.1	23.1	79.467	0	323.31	18159000000	271	sp|P28331|NDUS1_HUMAN;sp|P28331-2|NDUS1_HUMAN;sp|P28331-4|NDUS1_HUMAN;sp|P28331-3|NDUS1_HUMAN;sp|P28331-5|NDUS1_HUMAN	sp|P28331|NDUS1_HUMAN;sp|P28331-2|NDUS1_HUMAN;sp|P28331-4|NDUS1_HUMAN;sp|P28331-3|NDUS1_HUMAN;sp|P28331-5|NDUS1_HUMAN	sp|P28331|NDUS1_HUMAN NADH-ubiquinone oxidoreductase 75 kDa subunit, mitochondrial OS=Homo sapiens OX=9606 GN=NDUFS1 PE=1 SV=3;sp|P28331-2|NDUS1_HUMAN Isoform 2 of NADH-ubiquinone oxidoreductase 75 kDa subunit, mitochondrial OS=Homo sapiens OX=9606 GN=NDUF
29.07	29.0034	28.5913	28.7958	29.1054	28.9418	29.3032	29.1172	28.7611	29.5084	29.3192	29.0288	28.9869	29.0204	29.2614	28.9815	29.0459	28.6967	29.0298	29.3036	29.2243	29.0269	28.6588	28.5265				13	13	11	56.9	56.9	46.1	41.389	0	323.31	14843000000	536	sp|P28482|MK01_HUMAN;sp|P28482-2|MK01_HUMAN	sp|P28482|MK01_HUMAN;sp|P28482-2|MK01_HUMAN	sp|P28482|MK01_HUMAN Mitogen-activated protein kinase 1 OS=Homo sapiens OX=9606 GN=MAPK1 PE=1 SV=3;sp|P28482-2|MK01_HUMAN Isoform 2 of Mitogen-activated protein kinase 1 OS=Homo sapiens OX=9606 GN=MAPK1
31.3652	30.8234	31.021	31.3568	31.3505	31.2318	31.1282	30.8955	31.1445	31.2053	31.5389	31.4706	31.4487	31.7215	31.5545	31.4081	30.8497	31.607	31.3718	30.7818	31.5545	30.8526	31.0331	30.9776				11	11	11	50.8	50.8	50.8	48.287	0	323.31	62943000000	624	sp|P28491|CALR_PIG;sp|P27797|CALR_HUMAN	sp|P28491|CALR_PIG;sp|P27797|CALR_HUMAN	sp|P28491|CALR_PIG Calreticulin OS=Sus scrofa OX=9823 GN=CALR PE=1 SV=3;sp|P27797|CALR_HUMAN Calreticulin OS=Homo sapiens OX=9606 GN=CALR PE=1 SV=1
25.779	25.5253	26.1493	25.6612	25.0255	24.7186	25.5911	25.7982	26.3343	24.6158	25.0239	NaN	25.5711	25.4396	25.3539	26.3442	25.451	NaN	NaN	25.2729	25.6796	24.8864	26.0503	26.4063				2	2	2	23.6	23.6	23.6	15.638	0	31.529	1226300000	34	sp|P28768|SODM_PIG	sp|P28768|SODM_PIG	sp|P28768|SODM_PIG Superoxide dismutase [Mn], mitochondrial (Fragment) OS=Sus scrofa OX=9823 GN=SOD2 PE=2 SV=1
26.1726	26.5816	26.2101	26.4595	25.7394	26.6362	27.3001	26.9569	27.457	25.6583	26.9091	26.5034	26.4188	25.9285	25.857	24.3456	27.1255	26.4702	26.7381	25.9921	25.4446	26.6767	25.6649	23.7567				5	5	5	11.7	11.7	11.7	52.771	0	11.58	2353700000	91	sp|P28838-2|AMPL_HUMAN;sp|P28838|AMPL_HUMAN;sp|P28839|AMPL_PIG	sp|P28838-2|AMPL_HUMAN;sp|P28838|AMPL_HUMAN	sp|P28838-2|AMPL_HUMAN Isoform 2 of Cytosol aminopeptidase OS=Homo sapiens OX=9606 GN=LAP3;sp|P28838|AMPL_HUMAN Cytosol aminopeptidase OS=Homo sapiens OX=9606 GN=LAP3 PE=1 SV=3
23.5745	23.9954	24.34	22.6075	22.1248	23.3122	23.7796	24.0428	23.1204	24.2493	23.264	22.749	23.211	23.4072	23.4826	NaN	NaN	24.2854	22.087	23.9835	23.4448	23.687	23.9607	23.7237				7	7	7	11.9	11.9	11.9	138.35	0	8.1845	306620000	14	sp|P29144|TPP2_HUMAN	sp|P29144|TPP2_HUMAN	sp|P29144|TPP2_HUMAN Tripeptidyl-peptidase 2 OS=Homo sapiens OX=9606 GN=TPP2 PE=1 SV=4
26.7226	26.3778	26.4178	26.5603	26.721	26.4814	26.9686	26.6592	26.1475	27.1141	26.5629	25.9462	27.0468	26.4869	27.3488	27.2915	27.0095	26.3491	26.0898	22.8865	27.5731	26.8972	26.877	27.1407				13	13	12	23.2	23.2	22.1	109.87	0	210.38	2662600000	154	sp|P29323-2|EPHB2_HUMAN;sp|P29323-3|EPHB2_HUMAN;sp|P29323|EPHB2_HUMAN;sp|P54762-5|EPHB1_HUMAN;sp|P54762|EPHB1_HUMAN	sp|P29323-2|EPHB2_HUMAN;sp|P29323-3|EPHB2_HUMAN;sp|P29323|EPHB2_HUMAN	sp|P29323-2|EPHB2_HUMAN Isoform 2 of Ephrin type-B receptor 2 OS=Homo sapiens OX=9606 GN=EPHB2;sp|P29323-3|EPHB2_HUMAN Isoform 3 of Ephrin type-B receptor 2 OS=Homo sapiens OX=9606 GN=EPHB2;sp|P29323|EPHB2_HUMAN Ephrin type-B receptor 2 OS=Homo sapiens OX=
22.0642	NaN	22.4518	21.2703	21.7876	22.2403	22.3095	22.5422	22.4039	NaN	23.1649	22.6471	22.2118	22.2019	22.1825	22.4512	22.0164	23.8981	22.7563	22.8405	23.79	22.7669	21.2087	24.2143				4	4	4	11.2	11.2	11.2	63.124	0	6.5373	152700000	22	sp|P29350-2|PTN6_HUMAN;sp|P29350|PTN6_HUMAN;sp|P29350-3|PTN6_HUMAN;sp|P29350-4|PTN6_HUMAN	sp|P29350-2|PTN6_HUMAN;sp|P29350|PTN6_HUMAN;sp|P29350-3|PTN6_HUMAN;sp|P29350-4|PTN6_HUMAN	sp|P29350-2|PTN6_HUMAN Isoform 3 of Tyrosine-protein phosphatase non-receptor type 6 OS=Homo sapiens OX=9606 GN=PTPN6;sp|P29350|PTN6_HUMAN Tyrosine-protein phosphatase non-receptor type 6 OS=Homo sapiens OX=9606 GN=PTPN6 PE=1 SV=1;sp|P29350-3|PTN6_HUMAN Is
28.7498	28.7206	28.7754	28.851	28.4342	29.0795	28.6187	28.5101	28.7065	28.3223	28.7658	28.5466	28.4811	28.5851	28.4864	28.0412	28.1836	28.4546	28.5074	27.9487	28.0596	28.2541	28.0183	28.3735				9	9	9	28.1	28.1	28.1	67.877	0	283.88	9537400000	279	sp|P29401|TKT_HUMAN;sp|P29401-2|TKT_HUMAN	sp|P29401|TKT_HUMAN;sp|P29401-2|TKT_HUMAN	sp|P29401|TKT_HUMAN Transketolase OS=Homo sapiens OX=9606 GN=TKT PE=1 SV=3;sp|P29401-2|TKT_HUMAN Isoform 2 of Transketolase OS=Homo sapiens OX=9606 GN=TKT
24.6888	23.9561	24.3125	25.5106	24.7615	25.2763	23.6431	25.1219	23.3233	25.9954	25.3598	24.4167	24.2623	24.2359	24.2425	24.2865	24.7112	24.2313	23.935	24.1437	24.2708	24.1998	24.1948	23.9795				2	2	2	6.5	6.5	6.5	71.407	0	6.8552	493410000	29	sp|P29692-2|EF1D_HUMAN;sp|P29692-3|EF1D_HUMAN;sp|P29692-4|EF1D_HUMAN;sp|P29692|EF1D_HUMAN	sp|P29692-2|EF1D_HUMAN;sp|P29692-3|EF1D_HUMAN;sp|P29692-4|EF1D_HUMAN;sp|P29692|EF1D_HUMAN	sp|P29692-2|EF1D_HUMAN Isoform 2 of Elongation factor 1-delta OS=Homo sapiens OX=9606 GN=EEF1D;sp|P29692-3|EF1D_HUMAN Isoform 3 of Elongation factor 1-delta OS=Homo sapiens OX=9606 GN=EEF1D;sp|P29692-4|EF1D_HUMAN Isoform 4 of Elongation factor 1-delta OS=H
27.5884	25.7751	29.4664	29.0863	28.2324	27.4273	28.6739	25.1959	26.9563	27.5807	27.986	25.8139	26.9203	25.7126	28.3047	26.9621	26.3884	26.1794	27.7334	26.8364	29.077	26.5545	25.9812	26.6594				5	5	5	27.6	27.6	27.6	38.424	0	214.01	5283200000	115	sp|P29700|FETUA_PIG	sp|P29700|FETUA_PIG	sp|P29700|FETUA_PIG Alpha-2-HS-glycoprotein (Fragment) OS=Sus scrofa OX=9823 GN=AHSG PE=1 SV=1
27.709	28.4248	28.3308	28.2782	28.6109	27.0648	27.462	28.4009	28.5419	28.1172	28.1873	27.7666	28.3718	28.5544	27.3432	26.9633	28.6151	28.3908	28.5056	28.1651	28.4006	28.0385	28.2785	28.6147				3	3	3	28.5	28.5	28.5	15.565	0	116.44	7713800000	211	sp|P29762|RABP1_HUMAN	sp|P29762|RABP1_HUMAN	sp|P29762|RABP1_HUMAN Cellular retinoic acid-binding protein 1 OS=Homo sapiens OX=9606 GN=CRABP1 PE=1 SV=2
29.0359	29.6476	28.7672	29.7806	29.8944	29.7032	28.9156	29.5151	29.8733	29.5044	29.299	29.2882	29.2595	29.5909	29.2107	29.3187	29.4058	29.2902	29.3678	29.4203	28.9614	29.5632	29.2221	29.8861				12	12	12	44.2	44.2	44.2	43.121	0	148.82	17543000000	349	sp|P29804|ODPA_PIG;sp|P08559|ODPA_HUMAN;sp|P08559-4|ODPA_HUMAN;sp|P08559-3|ODPA_HUMAN;sp|P08559-2|ODPA_HUMAN;sp|P29803|ODPAT_HUMAN	sp|P29804|ODPA_PIG;sp|P08559|ODPA_HUMAN;sp|P08559-4|ODPA_HUMAN;sp|P08559-3|ODPA_HUMAN;sp|P08559-2|ODPA_HUMAN	sp|P29804|ODPA_PIG Pyruvate dehydrogenase E1 component subunit alpha, somatic form, mitochondrial (Fragment) OS=Sus scrofa OX=9823 GN=PDHA1 PE=1 SV=1;sp|P08559|ODPA_HUMAN Pyruvate dehydrogenase E1 component subunit alpha, somatic form, mitochondrial OS=Hom
25.3105	26.179	24.2508	25.5621	26.4398	26.2852	25.2952	26.0813	26.2227	25.7412	25.4331	26.1593	27.0401	26.4716	25.858	29.7109	26.5238	26.2285	22.2904	25.5745	NaN	26.7821	26.5613	26.7914				6	6	6	11.7	11.7	11.7	79.585	0	85.163	2248500000	134	sp|P29973|CNGA1_HUMAN;sp|P29973-2|CNGA1_HUMAN	sp|P29973|CNGA1_HUMAN;sp|P29973-2|CNGA1_HUMAN	sp|P29973|CNGA1_HUMAN cGMP-gated cation channel alpha-1 OS=Homo sapiens OX=9606 GN=CNGA1 PE=1 SV=3;sp|P29973-2|CNGA1_HUMAN Isoform 2 of cGMP-gated cation channel alpha-1 OS=Homo sapiens OX=9606 GN=CNGA1
27.8922	27.5162	26.3978	27.6673	28.063	27.1078	27.5145	27.2445	27.842	27.4792	26.7557	27.2291	27.0919	27.0432	27.539	27.4436	27.4597	27.1245	27.4748	27.2776	26.5134	27.4361	26.9472	26.9845				4	4	4	21.8	21.8	21.8	28.993	0	210.13	5222100000	191	sp|P30040|ERP29_HUMAN	sp|P30040|ERP29_HUMAN	sp|P30040|ERP29_HUMAN Endoplasmic reticulum resident protein 29 OS=Homo sapiens OX=9606 GN=ERP29 PE=1 SV=4
25.2426	24.1276	24.9098	25.5742	25.219	25.4741	24.9714	25.3891	24.9424	25.9129	24.9621	25.8675	25.222	24.7928	25.8622	25.3834	NaN	24.3782	27.1555	25.1122	25.4362	25.0269	25.1038	25.6914				2	2	2	18.9	18.9	18.9	22.119	0	27.534	1247700000	71	sp|P30043|BLVRB_HUMAN	sp|P30043|BLVRB_HUMAN	sp|P30043|BLVRB_HUMAN Flavin reductase (NADPH) OS=Homo sapiens OX=9606 GN=BLVRB PE=1 SV=3
30.1017	30.0826	29.4883	29.2228	29.7166	29.7855	30.0829	30.3711	29.3668	29.4509	29.7696	29.7768	30.0364	30.2238	29.2629	30.2457	30.2027	29.5021	29.9964	29.1139	29.6488	29.0321	29.4285	29.7259				5	5	5	40.7	40.7	40.7	17.031	0	208.53	22946000000	182	sp|P30044-2|PRDX5_HUMAN;sp|P30044|PRDX5_HUMAN;sp|P30044-3|PRDX5_HUMAN;sp|P30044-4|PRDX5_HUMAN	sp|P30044-2|PRDX5_HUMAN;sp|P30044|PRDX5_HUMAN;sp|P30044-3|PRDX5_HUMAN	sp|P30044-2|PRDX5_HUMAN Isoform Cytoplasmic+peroxisomal of Peroxiredoxin-5, mitochondrial OS=Homo sapiens OX=9606 GN=PRDX5;sp|P30044|PRDX5_HUMAN Peroxiredoxin-5, mitochondrial OS=Homo sapiens OX=9606 GN=PRDX5 PE=1 SV=4;sp|P30044-3|PRDX5_HUMAN Isoform 3 of
27.4955	26.9117	28.834	28.1683	28.2467	26.6444	27.3639	27.5448	28.9921	28.2999	25.9764	27.8628	27.3441	27.9352	25.7436	NaN	28.6453	27.401	27.304	26.8024	26.0671	27.6656	27.0016	27.2327				3	3	3	24.8	24.8	24.8	25.838	0	25.499	5760700000	104	sp|P30048-2|PRDX3_HUMAN;sp|P30048|PRDX3_HUMAN	sp|P30048-2|PRDX3_HUMAN;sp|P30048|PRDX3_HUMAN	sp|P30048-2|PRDX3_HUMAN Isoform 2 of Thioredoxin-dependent peroxide reductase, mitochondrial OS=Homo sapiens OX=9606 GN=PRDX3;sp|P30048|PRDX3_HUMAN Thioredoxin-dependent peroxide reductase, mitochondrial OS=Homo sapiens OX=9606 GN=PRDX3 PE=1 SV=3
27.8075	27.8499	27.4883	28.4398	27.1989	27.713	27.626	27.934	28.4768	27.2134	27.5529	27.1438	27.4515	27.514	27.7142	27.7756	26.8522	27.212	27.4026	25.8471	27.3253	27.2247	27.803	28.2155				4	4	4	35.8	35.8	35.8	17.818	0	118.31	5089900000	110	sp|P30050|RL12_HUMAN;sp|P30050-2|RL12_HUMAN	sp|P30050|RL12_HUMAN;sp|P30050-2|RL12_HUMAN	sp|P30050|RL12_HUMAN 60S ribosomal protein L12 OS=Homo sapiens OX=9606 GN=RPL12 PE=1 SV=1;sp|P30050-2|RL12_HUMAN Isoform 2 of 60S ribosomal protein L12 OS=Homo sapiens OX=9606 GN=RPL12
30.2687	31.3808	32.4982	31.996	31.5737	31.8521	31.7877	31.5608	31.1508	31.3433	28.1601	30.6672	31.3354	31.2928	31.6662	30.7855	30.7435	31.3942	31.0042	31.3929	30.2238	31.3059	31.475	31.2807				4	4	4	24.6	24.6	24.6	21.057	0	323.31	66198000000	272	sp|P30086|PEBP1_HUMAN	sp|P30086|PEBP1_HUMAN	sp|P30086|PEBP1_HUMAN Phosphatidylethanolamine-binding protein 1 OS=Homo sapiens OX=9606 GN=PEBP1 PE=1 SV=3
30.45	30.2545	30.5251	30.7357	29.9283	29.8584	30.393	30.415	30.7099	30.3877	30.2169	30.2415	29.75	30.1365	30.178	29.9276	30.8157	30.1487	29.759	29.8657	29.8904	30.3457	30.2017	29.8035				12	12	12	30.7	30.7	30.7	56.782	0	323.31	30803000000	515	sp|P30101|PDIA3_HUMAN	sp|P30101|PDIA3_HUMAN	sp|P30101|PDIA3_HUMAN Protein disulfide-isomerase A3 OS=Homo sapiens OX=9606 GN=PDIA3 PE=1 SV=4
26.0762	25.9982	25.8468	25.3205	26.8118	25.9782	25.9139	25.8808	25.4809	26.0439	25.9784	26.0555	26.2389	26.2805	26.2816	25.7002	26.2413	26.2317	25.7633	26.3149	25.8549	25.8548	25.7604	25.5153				8	8	8	32.5	32.5	32.5	48.14	0	207.54	1422500000	180	sp|P30419-2|NMT1_HUMAN;sp|P30419|NMT1_HUMAN;sp|O60551|NMT2_HUMAN	sp|P30419-2|NMT1_HUMAN;sp|P30419|NMT1_HUMAN	sp|P30419-2|NMT1_HUMAN Isoform Short of Glycylpeptide N-tetradecanoyltransferase 1 OS=Homo sapiens OX=9606 GN=NMT1;sp|P30419|NMT1_HUMAN Glycylpeptide N-tetradecanoyltransferase 1 OS=Homo sapiens OX=9606 GN=NMT1 PE=1 SV=2
24.2542	25.3939	24.1794	25.2665	25.3985	25.0377	24.108	25.4515	25.0975	24.6728	24.7058	24.9301	24.6649	25.4349	23.6279	NaN	25.749	25.0513	25.751	25.306	25.3909	25.3659	24.9065	24.5342				3	3	2	15.3	15.3	11.1	32.837	0	60.405	838050000	43	sp|P30519-2|HMOX2_HUMAN;sp|P30519|HMOX2_HUMAN	sp|P30519-2|HMOX2_HUMAN;sp|P30519|HMOX2_HUMAN	sp|P30519-2|HMOX2_HUMAN Isoform 2 of Heme oxygenase 2 OS=Homo sapiens OX=9606 GN=HMOX2;sp|P30519|HMOX2_HUMAN Heme oxygenase 2 OS=Homo sapiens OX=9606 GN=HMOX2 PE=1 SV=2
27.4311	26.7769	27.8069	27.4891	27.0901	26.3661	27.3345	27.095	27.8719	27.9477	27.4169	26.3202	26.9085	26.4692	26.8103	26.9534	27.1223	27.0065	27.6326	26.8975	28.3519	26.826	27.0688	26.7989				8	8	8	46.4	46.4	46.4	20.345	0	147.63	4236900000	170	sp|P30626-2|SORCN_HUMAN;sp|P30626|SORCN_HUMAN;sp|P30626-3|SORCN_HUMAN	sp|P30626-2|SORCN_HUMAN;sp|P30626|SORCN_HUMAN;sp|P30626-3|SORCN_HUMAN	sp|P30626-2|SORCN_HUMAN Isoform 2 of Sorcin OS=Homo sapiens OX=9606 GN=SRI;sp|P30626|SORCN_HUMAN Sorcin OS=Homo sapiens OX=9606 GN=SRI PE=1 SV=1;sp|P30626-3|SORCN_HUMAN Isoform 3 of Sorcin OS=Homo sapiens OX=9606 GN=SRI
26.3463	25.753	25.6221	25.5085	25.3861	25.8896	25.6971	26.3316	26.3607	26.4285	26.0324	26.0772	25.4225	26.0752	26.0313	NaN	26.3345	25.4109	25.6138	25.6261	25.9573	25.6356	26.2399	26.3473				7	7	7	11	11	11	133.9	0	50.068	1632400000	119	sp|P30876|RPB2_HUMAN	sp|P30876|RPB2_HUMAN	sp|P30876|RPB2_HUMAN DNA-directed RNA polymerase II subunit RPB2 OS=Homo sapiens OX=9606 GN=POLR2B PE=1 SV=1
29.7443	30.3297	29.9382	29.8647	30.4903	30.7386	29.6737	30.3412	30.516	30.8185	30.0153	30.5455	30.4814	30.3279	30.4075	30.5502	30.332	30.4997	29.9671	30.84	30.1087	30.2977	30.4752	30.5431				7	7	7	49	49	49	21.921	0	272.82	33294000000	406	sp|P31006|KGUA_PIG;sp|Q16774|KGUA_HUMAN;sp|Q16774-2|KGUA_HUMAN;sp|Q16774-3|KGUA_HUMAN	sp|P31006|KGUA_PIG	sp|P31006|KGUA_PIG Guanylate kinase OS=Sus scrofa OX=9823 GN=GUK1 PE=1 SV=2
29.9055	29.8659	29.8235	29.7352	29.9542	30.0474	30.067	29.5618	29.7068	30.0605	30.0549	30.0883	30.1673	30.428	30.4565	30.293	29.4741	30.2529	30.412	30.8128	29.9271	29.9884	29.5605	29.9566				18	12	10	55.9	42.5	36.2	50.582	0	323.31	33938000000	780	sp|P31150|GDIA_HUMAN	sp|P31150|GDIA_HUMAN	sp|P31150|GDIA_HUMAN Rab GDP dissociation inhibitor alpha OS=Homo sapiens OX=9606 GN=GDI1 PE=1 SV=2
27.969	27.6069	28.4815	27.9637	27.0914	27.5485	28.0288	27.5379	28.2539	27.6168	27.7116	27.6497	27.4344	27.3243	27.9853	27.4626	27.8331	27.6992	27.3341	28.2334	27.3924	27.2038	27.9328	28.1163				9	9	9	40.8	40.8	40.8	43.66	0	43.31	5195800000	128	sp|P31153|METK2_HUMAN;sp|P31153-2|METK2_HUMAN;sp|Q00266|METK1_HUMAN	sp|P31153|METK2_HUMAN;sp|P31153-2|METK2_HUMAN	sp|P31153|METK2_HUMAN S-adenosylmethionine synthase isoform type-2 OS=Homo sapiens OX=9606 GN=MAT2A PE=1 SV=1;sp|P31153-2|METK2_HUMAN Isoform 2 of S-adenosylmethionine synthase isoform type-2 OS=Homo sapiens OX=9606 GN=MAT2A
27.1234	27.3934	27.2714	26.7277	26.7081	26.8891	27.0234	27.0346	27.7021	27.4028	26.8579	27.2789	27.3748	27.5151	27.2584	27.6921	27.8183	27.3109	27.627	27.4583	27.2531	27.3146	26.9897	27.4367				10	8	8	37.8	30.9	30.9	46.302	0	323.31	4080800000	250	sp|P31323|KAP3_HUMAN	sp|P31323|KAP3_HUMAN	sp|P31323|KAP3_HUMAN cAMP-dependent protein kinase type II-beta regulatory subunit OS=Homo sapiens OX=9606 GN=PRKAR2B PE=1 SV=3
25.3728	25.0951	24.1911	25.408	23.2183	24.1522	25.5728	24.4522	NaN	22.6449	23.2624	25.4181	25.4136	25.016	25.1171	NaN	24.2746	23.6564	NaN	23.7196	24.8973	23.7656	24.5515	24.8				5	5	3	21.3	21.3	11.7	41.8	0	60.415	720960000	51	sp|P31483-2|TIA1_HUMAN;sp|P31483|TIA1_HUMAN;sp|P31483-3|TIA1_HUMAN	sp|P31483-2|TIA1_HUMAN;sp|P31483|TIA1_HUMAN;sp|P31483-3|TIA1_HUMAN	sp|P31483-2|TIA1_HUMAN Isoform Short of Nucleolysin TIA-1 isoform p40 OS=Homo sapiens OX=9606 GN=TIA1;sp|P31483|TIA1_HUMAN Nucleolysin TIA-1 isoform p40 OS=Homo sapiens OX=9606 GN=TIA1 PE=1 SV=3;sp|P31483-3|TIA1_HUMAN Isoform 3 of Nucleolysin TIA-1 isoform
25.771	26.4531	26.5019	26.5261	26.6178	26.7562	25.761	26.6305	27.7056	27.283	26.6433	26.2352	26.7829	26.6337	27.177	24.9667	27.447	26.8482	25.739	25.8934	26.4806	27.0596	26.8991	26.0895				8	8	8	39.5	39.5	39.5	44.868	0	88.303	2771800000	158	sp|P31689|DNJA1_HUMAN;sp|P31689-2|DNJA1_HUMAN	sp|P31689|DNJA1_HUMAN;sp|P31689-2|DNJA1_HUMAN	sp|P31689|DNJA1_HUMAN DnaJ homolog subfamily A member 1 OS=Homo sapiens OX=9606 GN=DNAJA1 PE=1 SV=2;sp|P31689-2|DNJA1_HUMAN Isoform 2 of DnaJ homolog subfamily A member 1 OS=Homo sapiens OX=9606 GN=DNAJA1
24.1216	24.4733	23.0259	24.7328	24.3991	NaN	24.4665	23.5032	23.3927	25.0548	25.0083	24.3941	25.1289	23.8873	24.1514	25.1471	NaN	NaN	23.7556	24.8224	24.709	24.3045	23.7668	23.6708				6	6	4	19.3	19.3	12.9	55.768	0	104.13	511600000	58	sp|P31751|AKT2_HUMAN;sp|P31751-2|AKT2_HUMAN	sp|P31751|AKT2_HUMAN;sp|P31751-2|AKT2_HUMAN	sp|P31751|AKT2_HUMAN RAC-beta serine/threonine-protein kinase OS=Homo sapiens OX=9606 GN=AKT2 PE=1 SV=2;sp|P31751-2|AKT2_HUMAN Isoform 2 of RAC-beta serine/threonine-protein kinase OS=Homo sapiens OX=9606 GN=AKT2
24.79	25.7371	24.9681	21.7141	24.7762	25.3383	24.9085	25.5285	24.8837	25.6538	24.1242	25.3617	25.1776	25.3385	24.5791	26.068	26.2714	24.7745	25.7495	25.1998	25.4342	25.6454	25.4156	25.4221				4	4	4	19.9	19.9	19.9	35.329	0	54.143	1013300000	82	sp|P31937|3HIDH_HUMAN	sp|P31937|3HIDH_HUMAN	sp|P31937|3HIDH_HUMAN 3-hydroxyisobutyrate dehydrogenase, mitochondrial OS=Homo sapiens OX=9606 GN=HIBADH PE=1 SV=2
28.5822	28.0206	27.5546	28.6888	28.2408	27.9609	28.2875	26.9738	28.2705	28.5567	27.9928	28.1761	28.2204	28.1273	28.6035	28.7828	28.303	28.8949	28.2306	28.4571	28.3455	27.4877	28.021	28.6188				8	8	8	41	41	41	36.926	0	323.31	7920600000	208	sp|P31942|HNRH3_HUMAN;sp|P31942-3|HNRH3_HUMAN;sp|P31942-2|HNRH3_HUMAN;sp|P31942-4|HNRH3_HUMAN;sp|P31942-5|HNRH3_HUMAN;sp|P31942-6|HNRH3_HUMAN	sp|P31942|HNRH3_HUMAN;sp|P31942-3|HNRH3_HUMAN;sp|P31942-2|HNRH3_HUMAN;sp|P31942-4|HNRH3_HUMAN;sp|P31942-5|HNRH3_HUMAN	sp|P31942|HNRH3_HUMAN Heterogeneous nuclear ribonucleoprotein H3 OS=Homo sapiens OX=9606 GN=HNRNPH3 PE=1 SV=2;sp|P31942-3|HNRH3_HUMAN Isoform 3 of Heterogeneous nuclear ribonucleoprotein H3 OS=Homo sapiens OX=9606 GN=HNRNPH3;sp|P31942-2|HNRH3_HUMAN Isoform
30.8952	30.7749	30.5516	30.8661	30.8452	30.4867	30.5614	30.696	31.0519	30.6247	30.4248	30.7574	30.3417	30.3553	30.7798	30.3299	30.7267	30.8153	30.573	30.8812	30.6303	30.7379	30.9386	30.7342				13	13	10	45.7	45.7	35.2	49.229	0	323.31	42751000000	542	sp|P31943|HNRH1_HUMAN	sp|P31943|HNRH1_HUMAN	sp|P31943|HNRH1_HUMAN Heterogeneous nuclear ribonucleoprotein H OS=Homo sapiens OX=9606 GN=HNRNPH1 PE=1 SV=4
30.4337	30.8602	31.0806	30.7836	30.3997	30.7768	30.4118	30.5062	30.3491	30.6474	30.811	30.3691	31.0443	30.8961	31.0654	30.5013	30.8529	31.0093	31.0833	31.1452	30.6522	30.4935	30.4212	30.713				10	5	5	45.9	27.9	27.9	27.85	0	323.31	37339000000	303	sp|P31946-2|1433B_HUMAN;sp|P31946|1433B_HUMAN	sp|P31946-2|1433B_HUMAN;sp|P31946|1433B_HUMAN	sp|P31946-2|1433B_HUMAN Isoform Short of 14-3-3 protein beta/alpha OS=Homo sapiens OX=9606 GN=YWHAB;sp|P31946|1433B_HUMAN 14-3-3 protein beta/alpha OS=Homo sapiens OX=9606 GN=YWHAB PE=1 SV=3
29.0412	28.417	28.5657	29.3638	28.3772	28.0397	28.7423	28.8325	28.951	28.7184	28.0376	28.7593	28.8502	28.7129	28.9727	28.9238	27.6459	28.3472	28.986	28.8706	29.0182	28.8775	28.9652	29.3352				8	8	8	16.4	16.4	16.4	62.639	0	323.31	12729000000	299	sp|P31948|STIP1_HUMAN;sp|P31948-3|STIP1_HUMAN;sp|P31948-2|STIP1_HUMAN	sp|P31948|STIP1_HUMAN;sp|P31948-3|STIP1_HUMAN;sp|P31948-2|STIP1_HUMAN	sp|P31948|STIP1_HUMAN Stress-induced-phosphoprotein 1 OS=Homo sapiens OX=9606 GN=STIP1 PE=1 SV=1;sp|P31948-3|STIP1_HUMAN Isoform 3 of Stress-induced-phosphoprotein 1 OS=Homo sapiens OX=9606 GN=STIP1;sp|P31948-2|STIP1_HUMAN Isoform 2 of Stress-induced-phosp
28.6855	28.0253	29.3028	27.0362	27.4292	27.7048	29.6064	27.958	26.7843	28.0164	26.7265	28.3193	28.3984	26.8057	28.8003	27.1907	28.2248	26.2678	28.208	27.2867	28.5988	27.1654	27.7212	26.9562				4	4	4	62.6	62.6	62.6	11.18	0	323.31	5936500000	201	sp|P31950|S10AB_PIG	sp|P31950|S10AB_PIG	sp|P31950|S10AB_PIG Protein S100-A11 OS=Sus scrofa OX=9823 GN=S100A11 PE=1 SV=1
31.4663	31.0899	31.7735	31.1925	31.7438	31.7424	31.3038	31.3247	30.1402	30.8807	31.7641	30.7052	31.021	31.2243	31.8067	30.6576	31.0587	31.5254	31.2852	30.872	31.3417	30.5314	31.6868	31.3672				4	3	2	29.3	25.3	19.7	21.892	0	104.12	57537000000	95	sp|P32119|PRDX2_HUMAN	sp|P32119|PRDX2_HUMAN	sp|P32119|PRDX2_HUMAN Peroxiredoxin-2 OS=Homo sapiens OX=9606 GN=PRDX2 PE=1 SV=5
23.7593	24.8233	23.5175	23.6222	24.1879	24.1557	24.7515	24.8776	23.9596	NaN	24.2669	24.269	24.4207	25.1919	24.0819	26.1185	24.7377	25.0578	24.5725	25.1282	NaN	24.5811	24.8641	24.4353				4	4	2	13.4	13.4	5.7	57.488	0	5.7547	588110000	33	sp|P32189-1|GLPK_HUMAN;sp|P32189-4|GLPK_HUMAN;sp|P32189-2|GLPK_HUMAN;sp|P32189|GLPK_HUMAN;sp|Q14409|GLPK3_HUMAN	sp|P32189-1|GLPK_HUMAN;sp|P32189-4|GLPK_HUMAN;sp|P32189-2|GLPK_HUMAN;sp|P32189|GLPK_HUMAN;sp|Q14409|GLPK3_HUMAN	sp|P32189-1|GLPK_HUMAN Isoform 1 of Glycerol kinase OS=Homo sapiens OX=9606 GN=GK;sp|P32189-4|GLPK_HUMAN Isoform 4 of Glycerol kinase OS=Homo sapiens OX=9606 GN=GK;sp|P32189-2|GLPK_HUMAN Isoform 2 of Glycerol kinase OS=Homo sapiens OX=9606 GN=GK;sp|P32189|
24.0492	24.0752	23.668	23.8609	23.9426	24.1623	23.3689	24.1033	23.5566	23.7721	23.5479	23.7665	23.4748	23.068	23.0823	NaN	NaN	23.8749	23.8582	23.9885	23.068	24.362	23.8434	23.7646				4	4	4	7.5	7.5	7.5	108.55	0	70.035	337230000	49	sp|P32418|NAC1_HUMAN;sp|P32418-2|NAC1_HUMAN;sp|P32418-3|NAC1_HUMAN;sp|P32418-4|NAC1_HUMAN;sp|P32418-5|NAC1_HUMAN	sp|P32418|NAC1_HUMAN;sp|P32418-2|NAC1_HUMAN;sp|P32418-3|NAC1_HUMAN;sp|P32418-4|NAC1_HUMAN;sp|P32418-5|NAC1_HUMAN	sp|P32418|NAC1_HUMAN Sodium/calcium exchanger 1 OS=Homo sapiens OX=9606 GN=SLC8A1 PE=1 SV=3;sp|P32418-2|NAC1_HUMAN Isoform 3 of Sodium/calcium exchanger 1 OS=Homo sapiens OX=9606 GN=SLC8A1;sp|P32418-3|NAC1_HUMAN Isoform 7 of Sodium/calcium exchanger 1 OS=H
26.8087	28.0919	28.0271	29.5894	28.3068	28.0076	28.0621	28.0509	28.282	28.814	27.9442	28.2775	28.5857	28.3274	27.9258	27.7752	27.9299	28.2089	28.786	27.8292	28.4279	28.8241	28.5198	28.2885				5	5	5	47.9	47.9	47.9	21.863	0	323.31	7661400000	105	sp|P32969|RL9_HUMAN	sp|P32969|RL9_HUMAN	sp|P32969|RL9_HUMAN 60S ribosomal protein L9 OS=Homo sapiens OX=9606 GN=RPL9 PE=1 SV=1
27.8673	27.5843	27.7877	27.4933	28.0055	27.6744	28.0428	27.7207	27.5712	27.3743	27.3738	27.8261	27.8051	27.4271	27.592	27.8647	27.9931	27.7002	27.3088	27.9418	27.8622	27.6203	27.7125	27.9354				15	15	11	22.5	22.5	16.3	109.68	0	323.31	5208700000	260	sp|P33176|KINH_HUMAN	sp|P33176|KINH_HUMAN	sp|P33176|KINH_HUMAN Kinesin-1 heavy chain OS=Homo sapiens OX=9606 GN=KIF5B PE=1 SV=1
28.7599	28.7519	28.7374	29.0279	27.8948	28.1698	28.8689	28.4865	28.5929	28.4173	27.5605	28.0048	27.7774	27.9805	28.6345	28.4753	28.8914	27.8412	27.1135	27.2916	28.2262	28.6108	28.1634	28.1276				12	12	11	36.1	36.1	34	47.526	0	323.31	9042700000	321	sp|P33198|IDHP_PIG;sp|P48735-2|IDHP_HUMAN;sp|P48735|IDHP_HUMAN	sp|P33198|IDHP_PIG;sp|P48735-2|IDHP_HUMAN;sp|P48735|IDHP_HUMAN	sp|P33198|IDHP_PIG Isocitrate dehydrogenase [NADP], mitochondrial (Fragment) OS=Sus scrofa OX=9823 GN=IDH2 PE=1 SV=1;sp|P48735-2|IDHP_HUMAN Isoform 2 of Isocitrate dehydrogenase [NADP], mitochondrial OS=Homo sapiens OX=9606 GN=IDH2;sp|P48735|IDHP_HUMAN Iso
26.2089	25.6724	25.6453	26.3055	26.2699	26.1044	25.4338	26.3632	25.7404	25.991	25.9901	26.4632	26.3337	25.9891	25.9222	24.7997	25.9444	26.0547	25.6153	25.8044	25.8111	25.6342	26.1093	25.8614				7	7	3	21.4	21.4	10.4	59.251	0	111.76	1486100000	150	sp|P33240-2|CSTF2_HUMAN;sp|P33240|CSTF2_HUMAN	sp|P33240-2|CSTF2_HUMAN;sp|P33240|CSTF2_HUMAN	sp|P33240-2|CSTF2_HUMAN Isoform 2 of Cleavage stimulation factor subunit 2 OS=Homo sapiens OX=9606 GN=CSTF2;sp|P33240|CSTF2_HUMAN Cleavage stimulation factor subunit 2 OS=Homo sapiens OX=9606 GN=CSTF2 PE=1 SV=1
25.597	24.3563	25.0308	24.7711	25.3749	25.5317	23.4353	25.0426	24.9337	25.9142	25.8981	25.2213	24.6215	25.3203	NaN	24.1403	24.8812	24.8584	24.7714	22.9422	25.5916	25.7126	24.7256	24.3273				4	4	3	13	13	10.1	53.454	0	31.534	798360000	38	sp|P34897-3|GLYM_HUMAN;sp|P34897-2|GLYM_HUMAN;sp|P34897|GLYM_HUMAN;sp|P34896-4|GLYC_HUMAN	sp|P34897-3|GLYM_HUMAN;sp|P34897-2|GLYM_HUMAN;sp|P34897|GLYM_HUMAN	sp|P34897-3|GLYM_HUMAN Isoform 3 of Serine hydroxymethyltransferase, mitochondrial OS=Homo sapiens OX=9606 GN=SHMT2;sp|P34897-2|GLYM_HUMAN Isoform 2 of Serine hydroxymethyltransferase, mitochondrial OS=Homo sapiens OX=9606 GN=SHMT2;sp|P34897|GLYM_HUMAN Ser
30.0882	29.7146	29.5737	30.1816	29.7686	30.0053	29.6367	29.9964	30.2223	29.9624	30.0383	30.256	30.1411	30.3133	29.9773	29.9245	30.2884	30.2237	30.3767	30.353	30.0918	29.9296	30.194	29.9568				20	20	18	37.1	37.1	33.6	94.33	0	323.31	26843000000	678	sp|P34932|HSP74_HUMAN;sp|P34932-2|HSP74_HUMAN	sp|P34932|HSP74_HUMAN	sp|P34932|HSP74_HUMAN Heat shock 70 kDa protein 4 OS=Homo sapiens OX=9606 GN=HSPA4 PE=1 SV=4
25.6576	27.1516	24.6648	27.1485	24.5495	27.2584	26.0448	26.7859	25.6023	25.5906	24.3008	24.7692	25.9954	25.8214	25.2857	26.229	26.2686	25.0944	25.8651	25.1341	25.0059	26.8535	25.7926	25.8561				3	3	3	6.4	6.4	6.4	46.655	0	18.93	1651000000	54	sp|P34949|MPI_HUMAN;sp|P34949-2|MPI_HUMAN	sp|P34949|MPI_HUMAN	sp|P34949|MPI_HUMAN Mannose-6-phosphate isomerase OS=Homo sapiens OX=9606 GN=MPI PE=1 SV=2
28.2153	27.9555	28.0083	27.7858	27.8979	27.5633	28.4331	27.4297	27.0412	27.7608	27.8882	28.268	27.9566	27.4033	27.9807	26.0175	27.3546	26.0605	28.5997	27.3568	28.4247	27.7978	27.9452	27.7152				6	6	2	47.9	47.9	7.1	15.088	0	101.43	6684900000	186	sp|P35080-2|PROF2_HUMAN	sp|P35080-2|PROF2_HUMAN	sp|P35080-2|PROF2_HUMAN Isoform IIb of Profilin-2 OS=Homo sapiens OX=9606 GN=PFN2
29.4032	29.0282	29.7692	29.7613	29.4034	29.4122	29.7704	29.3433	29.3738	29.7352	29.7788	29.6025	29.1282	28.9393	29.4955	29.3827	29.2897	29.0402	29.2889	28.5792	29.556	28.9516	29.5994	29.1694				23	23	19	46.8	46.8	41.2	100.07	0	323.31	16213000000	699	sp|P35221|CTNA1_HUMAN;sp|P35221-2|CTNA1_HUMAN;sp|P35221-3|CTNA1_HUMAN;sp|Q9UI47|CTNA3_HUMAN	sp|P35221|CTNA1_HUMAN;sp|P35221-2|CTNA1_HUMAN;sp|P35221-3|CTNA1_HUMAN	sp|P35221|CTNA1_HUMAN Catenin alpha-1 OS=Homo sapiens OX=9606 GN=CTNNA1 PE=1 SV=1;sp|P35221-2|CTNA1_HUMAN Isoform 2 of Catenin alpha-1 OS=Homo sapiens OX=9606 GN=CTNNA1;sp|P35221-3|CTNA1_HUMAN Isoform 3 of Catenin alpha-1 OS=Homo sapiens OX=9606 GN=CTNNA1
29.326	28.3878	29.1658	28.9829	28.6832	28.6076	29.412	28.5936	28.6219	29.0103	28.7458	29.1311	28.5608	28.3224	28.9266	28.4696	28.1528	28.5964	28.3402	28.5208	29.3924	28.4135	28.8523	28.7833				20	20	16	42.5	42.5	38	85.496	0	323.31	11351000000	479	sp|P35222|CTNB1_HUMAN	sp|P35222|CTNB1_HUMAN	sp|P35222|CTNB1_HUMAN Catenin beta-1 OS=Homo sapiens OX=9606 GN=CTNNB1 PE=1 SV=1
29.5844	30.0816	29.7797	29.6024	29.594	29.6337	29.4679	29.832	29.9066	29.3113	29.4793	29.2388	29.5781	29.4054	29.5978	29.4211	29.256	29.0937	29.4709	29.5147	28.8858	29.6868	29.5894	29.8308				12	12	12	68.4	68.4	68.4	29.804	0	323.31	17471000000	325	sp|P35232|PHB_HUMAN;sp|P35232-2|PHB_HUMAN	sp|P35232|PHB_HUMAN;sp|P35232-2|PHB_HUMAN	sp|P35232|PHB_HUMAN Prohibitin OS=Homo sapiens OX=9606 GN=PHB PE=1 SV=1;sp|P35232-2|PHB_HUMAN Isoform 2 of Prohibitin OS=Homo sapiens OX=9606 GN=PHB
30.1011	31.0908	30.2665	30.2781	31.0638	30.5544	29.9704	30.3295	32.0178	29.8343	29.8094	30.5115	30.1567	30.1865	30.0352	29.5339	29.9814	30.448	30.481	30.3189	29.2215	30.234	30.4641	30.3835				2	2	2	14.5	14.5	14.5	23.13	0	323.31	34802000000	328	sp|P35243|RECO_HUMAN	sp|P35243|RECO_HUMAN	sp|P35243|RECO_HUMAN Recoverin OS=Homo sapiens OX=9606 GN=RCVRN PE=1 SV=2
28.3902	27.4079	27.9633	27.9811	28.025	27.3039	27.9848	27.6181	28.1238	27.597	28.4705	27.4498	27.6488	27.7674	28.077	27.3906	27.7166	27.7808	28.2768	27.745	27.8223	27.487	28.0594	27.3681				3	3	3	40.6	40.6	40.6	14.759	0	115.61	6481000000	186	sp|P67985|RL22_PIG;sp|P35268|RL22_HUMAN	sp|P67985|RL22_PIG;sp|P35268|RL22_HUMAN	sp|P67985|RL22_PIG 60S ribosomal protein L22 OS=Sus scrofa OX=9823 GN=RPL22 PE=1 SV=2;sp|P35268|RL22_HUMAN 60S ribosomal protein L22 OS=Homo sapiens OX=9606 GN=RPL22 PE=1 SV=2
28.5214	28.8605	28.2105	28.2852	28.2309	28.8522	28.3282	29.3096	28.1809	28.7053	28.2591	28.5799	28.7561	28.4462	28.0917	29.3245	28.9181	29.093	28.324	28.5194	28.598	29.1024	28.9077	29.4051				23	23	23	19.4	19.4	19.4	174.76	0	323.31	11172000000	467	sp|P35573|GDE_HUMAN;sp|P35573-2|GDE_HUMAN;sp|P35573-3|GDE_HUMAN	sp|P35573|GDE_HUMAN;sp|P35573-2|GDE_HUMAN;sp|P35573-3|GDE_HUMAN	sp|P35573|GDE_HUMAN Glycogen debranching enzyme OS=Homo sapiens OX=9606 GN=AGL PE=1 SV=3;sp|P35573-2|GDE_HUMAN Isoform 5 of Glycogen debranching enzyme OS=Homo sapiens OX=9606 GN=AGL;sp|P35573-3|GDE_HUMAN Isoform 6 of Glycogen debranching enzyme OS=Homo sa
30.3863	29.4067	30.5853	30.1752	29.9624	29.8241	30.7251	29.7899	30.2561	30.3489	30.4174	30.2115	29.8195	29.3303	30.5699	29.5888	29.8281	29.3564	30.096	29.8597	30.4102	29.0929	29.6697	29.4637				35	35	29	24.8	24.8	20.6	226.53	0	323.31	24513000000	801	sp|P35579|MYH9_HUMAN;sp|P35579-2|MYH9_HUMAN	sp|P35579|MYH9_HUMAN;sp|P35579-2|MYH9_HUMAN	sp|P35579|MYH9_HUMAN Myosin-9 OS=Homo sapiens OX=9606 GN=MYH9 PE=1 SV=4;sp|P35579-2|MYH9_HUMAN Isoform 2 of Myosin-9 OS=Homo sapiens OX=9606 GN=MYH9
28.9433	28.9351	28.708	28.7704	29.0931	28.7787	28.9114	28.962	28.7096	29.2676	28.9998	29.2915	28.7026	29.2159	29.2438	29.2016	29.0327	29.1421	29.0965	29.0774	28.9667	28.8774	28.7835	28.9559				31	27	23	23	19.6	16.9	229	0	323.31	11485000000	627	sp|P35580|MYH10_HUMAN;sp|P35580-5|MYH10_HUMAN;sp|P35580-2|MYH10_HUMAN;sp|P35580-3|MYH10_HUMAN;sp|P35580-4|MYH10_HUMAN	sp|P35580|MYH10_HUMAN;sp|P35580-5|MYH10_HUMAN;sp|P35580-2|MYH10_HUMAN;sp|P35580-3|MYH10_HUMAN;sp|P35580-4|MYH10_HUMAN	sp|P35580|MYH10_HUMAN Myosin-10 OS=Homo sapiens OX=9606 GN=MYH10 PE=1 SV=3;sp|P35580-5|MYH10_HUMAN Isoform 5 of Myosin-10 OS=Homo sapiens OX=9606 GN=MYH10;sp|P35580-2|MYH10_HUMAN Isoform 2 of Myosin-10 OS=Homo sapiens OX=9606 GN=MYH10;sp|P35580-3|MYH10_HUM
27.9999	28.0689	28.2463	28.1614	27.6786	28.0329	28.2626	27.8559	28.4172	28.248	28.1924	28.2958	27.9185	27.8053	27.9977	28.179	27.5048	27.7387	27.5726	27.2024	28.2042	27.9318	27.9275	28.2633				17	17	17	31.2	31.2	31.2	102.49	0	241.54	6077100000	305	sp|P35606|COPB2_HUMAN;sp|P35606-2|COPB2_HUMAN	sp|P35606|COPB2_HUMAN;sp|P35606-2|COPB2_HUMAN	sp|P35606|COPB2_HUMAN Coatomer subunit beta OS=Homo sapiens OX=9606 GN=COPB2 PE=1 SV=2;sp|P35606-2|COPB2_HUMAN Isoform 2 of Coatomer subunit beta OS=Homo sapiens OX=9606 GN=COPB2
27.3884	26.7032	27.5449	26.6153	27.1399	26.7277	26.8486	26.6966	26.7272	27.1229	27.4075	26.7813	26.606	26.6157	27.2323	27.7982	27.0915	26.9162	26.733	26.824	27.3449	27.261	27.211	26.3497				5	5	5	19.3	19.3	19.3	69.984	0	251.61	4077800000	188	sp|P35611-2|ADDA_HUMAN;sp|P35611-6|ADDA_HUMAN;sp|P35611-4|ADDA_HUMAN;sp|P35611|ADDA_HUMAN;sp|P35611-3|ADDA_HUMAN;sp|P35611-5|ADDA_HUMAN	sp|P35611-2|ADDA_HUMAN;sp|P35611-6|ADDA_HUMAN;sp|P35611-4|ADDA_HUMAN;sp|P35611|ADDA_HUMAN;sp|P35611-3|ADDA_HUMAN;sp|P35611-5|ADDA_HUMAN	sp|P35611-2|ADDA_HUMAN Isoform 2 of Alpha-adducin OS=Homo sapiens OX=9606 GN=ADD1;sp|P35611-6|ADDA_HUMAN Isoform 6 of Alpha-adducin OS=Homo sapiens OX=9606 GN=ADD1;sp|P35611-4|ADDA_HUMAN Isoform 4 of Alpha-adducin OS=Homo sapiens OX=9606 GN=ADD1;sp|P35611|
25.5471	26.5393	24.8948	26.1238	26.2556	25.9165	26.4932	26.8504	24.9097	26.2674	25.8697	27.0401	26.5992	27.1778	26.4478	27.907	26.4984	26.8754	25.7421	25.5314	26.3271	25.9297	26.5668	27.6987				8	8	8	21.3	21.3	21.3	62.466	0	204.96	2290900000	106	sp|P35612-2|ADDB_HUMAN;sp|P35612-8|ADDB_HUMAN;sp|P35612-9|ADDB_HUMAN;sp|P35612-4|ADDB_HUMAN;sp|P35612-3|ADDB_HUMAN;sp|P35612|ADDB_HUMAN;sp|P35612-5|ADDB_HUMAN;sp|P35612-6|ADDB_HUMAN;sp|P35612-7|ADDB_HUMAN	sp|P35612-2|ADDB_HUMAN;sp|P35612-8|ADDB_HUMAN;sp|P35612-9|ADDB_HUMAN;sp|P35612-4|ADDB_HUMAN;sp|P35612-3|ADDB_HUMAN;sp|P35612|ADDB_HUMAN	sp|P35612-2|ADDB_HUMAN Isoform 2 of Beta-adducin OS=Homo sapiens OX=9606 GN=ADD2;sp|P35612-8|ADDB_HUMAN Isoform 8 of Beta-adducin OS=Homo sapiens OX=9606 GN=ADD2;sp|P35612-9|ADDB_HUMAN Isoform 9 of Beta-adducin OS=Homo sapiens OX=9606 GN=ADD2;sp|P35612-4|A
28.0672	28.2117	21.6454	28.373	28.758	28.4595	28.4706	28.0754	28.8208	28.781	29.0166	28.0646	28.4109	28.0089	28.0096	28.2266	28.2671	28.6366	28.3611	28.231	28.6481	27.619	27.8882	28.0564				4	4	3	12.8	12.8	11	53.354	0	47.844	6264800000	138	sp|P35637-2|FUS_HUMAN;sp|P35637|FUS_HUMAN	sp|P35637-2|FUS_HUMAN;sp|P35637|FUS_HUMAN	sp|P35637-2|FUS_HUMAN Isoform Short of RNA-binding protein FUS OS=Homo sapiens OX=9606 GN=FUS;sp|P35637|FUS_HUMAN RNA-binding protein FUS OS=Homo sapiens OX=9606 GN=FUS PE=1 SV=1
27.1114	27.5441	26.8772	27.1486	26.6851	26.2583	27.3931	26.8806	27.0711	26.8706	26.9055	26.7523	27.1527	26.6509	27.2725	27.2507	26.0753	26.6098	27.2031	27.0035	26.821	27.1675	26.9688	27.248				3	3	3	10.3	10.3	10.3	38.704	0	156.51	3969400000	110	sp|P35659-2|DEK_HUMAN;sp|P35659|DEK_HUMAN	sp|P35659-2|DEK_HUMAN;sp|P35659|DEK_HUMAN	sp|P35659-2|DEK_HUMAN Isoform 2 of Protein DEK OS=Homo sapiens OX=9606 GN=DEK;sp|P35659|DEK_HUMAN Protein DEK OS=Homo sapiens OX=9606 GN=DEK PE=1 SV=1
27.8621	26.9698	27.5501	27.8056	27.4985	27.9266	27.7716	27.2709	27.2975	28.3297	27.6732	27.9477	27.7951	26.7925	28.1564	26.3638	26.9803	27.8774	27.2244	27.4479	27.6272	27.2689	27.4357	27.383				24	24	24	52.9	52.9	52.9	81.738	0	201.92	4717100000	364	sp|P35750|CAN1_PIG;sp|P07384|CAN1_HUMAN	sp|P35750|CAN1_PIG	sp|P35750|CAN1_PIG Calpain-1 catalytic subunit OS=Sus scrofa OX=9823 GN=CAPN1 PE=2 SV=3
27.9112	28.9758	27.7703	28.265	29.7131	28.2544	27.5319	28.9388	28.6216	29.1383	28.7378	28.8017	28.7875	28.3456	28.655	29.0657	29.4064	29.1148	28.8405	29.1262	27.4878	29.2463	29.0492	29.2276				17	17	12	23.1	23.1	16.4	98.236	0	323.31	12251000000	632	sp|P35913-2|PDE6B_HUMAN;sp|P35913|PDE6B_HUMAN;sp|P35913-3|PDE6B_HUMAN	sp|P35913-2|PDE6B_HUMAN;sp|P35913|PDE6B_HUMAN;sp|P35913-3|PDE6B_HUMAN	sp|P35913-2|PDE6B_HUMAN Isoform 2 of Rod cGMP-specific 3,5-cyclic phosphodiesterase subunit beta OS=Homo sapiens OX=9606 GN=PDE6B;sp|P35913|PDE6B_HUMAN Rod cGMP-specific 3,5-cyclic phosphodiesterase subunit beta OS=Homo sapiens OX=9606 GN=PDE6B PE=1 SV
28.6631	29.427	31.0121	28.5639	29.4051	29.7887	22.4952	22.0896	22.0918	22.9118	25.3736	25.8121	25.1366	25.2926	26.0695	NaN	21.6208	25.742	23.394	25.2814	25.2184	22.893	24.77	23.3233				7	7	7	8.6	8.6	8.6	151.53	0	289.16	4892300000	159	sp|P35968|VGFR2_HUMAN;sp|P35968-2|VGFR2_HUMAN;sp|P35968-3|VGFR2_HUMAN	sp|P35968|VGFR2_HUMAN;sp|P35968-2|VGFR2_HUMAN;sp|P35968-3|VGFR2_HUMAN	sp|P35968|VGFR2_HUMAN Vascular endothelial growth factor receptor 2 OS=Homo sapiens OX=9606 GN=KDR PE=1 SV=2;sp|P35968-2|VGFR2_HUMAN Isoform 2 of Vascular endothelial growth factor receptor 2 OS=Homo sapiens OX=9606 GN=KDR;sp|P35968-3|VGFR2_HUMAN Isoform 3
27.98	27.4705	27.5834	27.7114	28.1722	27.5923	27.6389	27.6576	27.5939	27.9788	27.416	28.0752	27.3724	27.3894	28.3509	28.098	28.1011	27.3772	27.6455	27.9042	27.5827	27.6039	27.5314	27.5431				14	14	14	42.5	42.5	42.5	48.633	0	132.02	5712600000	325	sp|P35998|PRS7_HUMAN;sp|P35998-2|PRS7_HUMAN	sp|P35998|PRS7_HUMAN;sp|P35998-2|PRS7_HUMAN	sp|P35998|PRS7_HUMAN 26S proteasome regulatory subunit 7 OS=Homo sapiens OX=9606 GN=PSMC2 PE=1 SV=3;sp|P35998-2|PRS7_HUMAN Isoform 2 of 26S proteasome regulatory subunit 7 OS=Homo sapiens OX=9606 GN=PSMC2
29.3512	29.6051	29.1267	29.1778	28.9698	29.7585	29.2107	29.5271	29.4925	29.4866	29.2113	29.059	29.4794	29.1889	29.1816	29.0968	28.007	29.2856	29.0979	29.4362	28.3883	29.441	29.3521	29.4977				10	10	10	73.6	73.6	73.6	20.483	0	323.31	16922000000	271	sp|Q52NJ4|ARL3_PIG;sp|P36405|ARL3_HUMAN	sp|Q52NJ4|ARL3_PIG;sp|P36405|ARL3_HUMAN	sp|Q52NJ4|ARL3_PIG ADP-ribosylation factor-like protein 3 OS=Sus scrofa OX=9823 GN=ARL3 PE=2 SV=1;sp|P36405|ARL3_HUMAN ADP-ribosylation factor-like protein 3 OS=Homo sapiens OX=9606 GN=ARL3 PE=1 SV=2
28.2715	28.4568	27.9248	27.4045	28.174	27.7307	27.4154	28.0651	27.9344	27.9692	27.7155	28.9172	27.5603	27.7841	28.2609	29.292	28.2756	27.6451	28.0742	28.603	28.1836	28.0739	28.0787	28.3169				5	5	5	29.6	29.6	29.6	26.145	0	74.751	7527400000	170	sp|P36543|VATE1_HUMAN;sp|P36543-2|VATE1_HUMAN;sp|P36543-3|VATE1_HUMAN;sp|Q96A05|VATE2_HUMAN	sp|P36543|VATE1_HUMAN;sp|P36543-2|VATE1_HUMAN	sp|P36543|VATE1_HUMAN V-type proton ATPase subunit E 1 OS=Homo sapiens OX=9606 GN=ATP6V1E1 PE=1 SV=1;sp|P36543-2|VATE1_HUMAN Isoform 2 of V-type proton ATPase subunit E 1 OS=Homo sapiens OX=9606 GN=ATP6V1E1
24.5807	23.5816	25.3527	NaN	24.3415	23.8885	24.024	24.5557	25.3067	25.5785	24.2743	23.5253	NaN	25.3752	24.5013	25.1552	22.6061	23.9104	23.6508	21.9912	23.7392	24.6465	23.8792	24.2594				6	6	6	18.9	18.9	18.9	50.151	0	22.371	655830000	70	sp|P36551|HEM6_HUMAN	sp|P36551|HEM6_HUMAN	sp|P36551|HEM6_HUMAN Oxygen-dependent coproporphyrinogen-III oxidase, mitochondrial OS=Homo sapiens OX=9606 GN=CPOX PE=1 SV=3
28.5927	28.1918	29.23	27.8563	28.1601	28.2999	28.8197	28.3347	28.911	28.8822	27.6508	28.6766	28.1661	27.8809	28.5376	28.5756	28.0352	28.8113	28.1435	28.5277	27.8556	28.3238	28.27	27.9719				7	7	7	22	22	22	47.697	0	169.19	9174500000	172	sp|P36578|RL4_HUMAN	sp|P36578|RL4_HUMAN	sp|P36578|RL4_HUMAN 60S ribosomal protein L4 OS=Homo sapiens OX=9606 GN=RPL4 PE=1 SV=5
26.3136	27.1229	26.5422	26.9773	27.3498	27.2232	26.4939	26.9403	27.2575	27.1785	27.1754	27.1808	27.0269	27.738	27.051	27.2437	27.9827	27.2739	27.1444	28.0089	26.7788	26.8017	26.6652	26.3478				8	8	8	18.9	18.9	18.9	85.64	0	323.31	3081700000	188	sp|P36776-3|LONM_HUMAN;sp|P36776-2|LONM_HUMAN;sp|P36776|LONM_HUMAN	sp|P36776-3|LONM_HUMAN;sp|P36776-2|LONM_HUMAN;sp|P36776|LONM_HUMAN	sp|P36776-3|LONM_HUMAN Isoform 3 of Lon protease homolog, mitochondrial OS=Homo sapiens OX=9606 GN=LONP1;sp|P36776-2|LONM_HUMAN Isoform 2 of Lon protease homolog, mitochondrial OS=Homo sapiens OX=9606 GN=LONP1;sp|P36776|LONM_HUMAN Lon protease homolog, mit
30.1726	30.1405	30.4743	30.1441	30.4354	30.4521	30.2878	30.5559	30.6658	30.9218	30.1972	29.9261	30.3257	30.325	30.2	30.504	30.8571	30.3986	30.4861	30.3417	30.1636	30.587	30.4716	30.0775				11	11	11	37.2	37.2	37.2	61.448	0	323.31	32775000000	324	sp|P36871|PGM1_HUMAN;sp|P36871-2|PGM1_HUMAN;sp|P36871-3|PGM1_HUMAN	sp|P36871|PGM1_HUMAN;sp|P36871-2|PGM1_HUMAN;sp|P36871-3|PGM1_HUMAN	sp|P36871|PGM1_HUMAN Phosphoglucomutase-1 OS=Homo sapiens OX=9606 GN=PGM1 PE=1 SV=3;sp|P36871-2|PGM1_HUMAN Isoform 2 of Phosphoglucomutase-1 OS=Homo sapiens OX=9606 GN=PGM1;sp|P36871-3|PGM1_HUMAN Isoform 3 of Phosphoglucomutase-1 OS=Homo sapiens OX=9606 GN
28.9783	28.9618	28.9656	28.7712	28.685	28.7616	29.0316	28.9712	28.9893	28.6719	28.6158	28.8606	28.8922	28.9545	28.9658	28.6571	29.4527	28.8443	29.3197	29.2273	29.2221	28.9912	28.8139	28.8517				12	12	3	54.2	54.2	14.6	36.983	0	323.31	11883000000	353	sp|P36873|PP1G_HUMAN;sp|P36873-2|PP1G_HUMAN	sp|P36873|PP1G_HUMAN;sp|P36873-2|PP1G_HUMAN	sp|P36873|PP1G_HUMAN Serine/threonine-protein phosphatase PP1-gamma catalytic subunit OS=Homo sapiens OX=9606 GN=PPP1CC PE=1 SV=1;sp|P36873-2|PP1G_HUMAN Isoform Gamma-2 of Serine/threonine-protein phosphatase PP1-gamma catalytic subunit OS=Homo sapiens OX=
25.8294	25.8319	25.0712	23.6779	25.3105	24.1634	25.5307	25.434	25.0546	25.6006	25.2978	25.7369	24.7286	22.658	25.1234	NaN	24.3153	25.6247	24.6488	23.5889	23.7756	25.881	24.9569	25.9147				6	6	6	16.1	16.1	16.1	68.66	0	75.33	888140000	78	sp|P36915|GNL1_HUMAN;sp|P36915-2|GNL1_HUMAN	sp|P36915|GNL1_HUMAN;sp|P36915-2|GNL1_HUMAN	sp|P36915|GNL1_HUMAN Guanine nucleotide-binding protein-like 1 OS=Homo sapiens OX=9606 GN=GNL1 PE=1 SV=2;sp|P36915-2|GNL1_HUMAN Isoform 2 of Guanine nucleotide-binding protein-like 1 OS=Homo sapiens OX=9606 GN=GNL1
24.9051	25.1971	25.5066	25.4832	24.7704	25.3106	25.8775	25.9875	23.7553	25.6442	25.5714	22.8598	25.249	24.1395	25.3349	24.8844	NaN	24.9824	25.0943	24.7072	24.7785	25.3515	25.1328	26.1841				4	4	2	13.6	13.6	7.4	46.312	0	51.797	1028500000	82	sp|P36955|PEDF_HUMAN	sp|P36955|PEDF_HUMAN	sp|P36955|PEDF_HUMAN Pigment epithelium-derived factor OS=Homo sapiens OX=9606 GN=SERPINF1 PE=1 SV=4
22.4967	23.41	23.6942	24.2513	24.3371	NaN	22.5584	23.6726	NaN	23.2733	24.5996	23.4563	22.5386	22.0567	23.393	NaN	22.2474	21.9135	22.84	22.2333	23.0103	23.0601	23.2145	22.9607				3	3	3	20.3	20.3	20.3	37.418	0	6.4365	266040000	31	sp|P36959|GMPR1_HUMAN	sp|P36959|GMPR1_HUMAN	sp|P36959|GMPR1_HUMAN GMP reductase 1 OS=Homo sapiens OX=9606 GN=GMPR PE=1 SV=1
27.9924	28.258	26.8425	28.1748	28.0758	25.0401	28.2554	28.8268	27.5509	26.654	27.3732	27.8697	28.7352	28.2612	28.5825	28.823	28.7254	28.968	28.1153	28.3113	28.1474	27.9365	27.8097	28.2182				2	2	2	14.7	14.7	14.7	19.491	0.00034435	4.3238	7727700000	40	sp|P36968-2|GPX4_PIG;sp|P36968|GPX4_PIG;sp|P36969-2|GPX4_HUMAN;sp|P36969|GPX4_HUMAN	sp|P36968-2|GPX4_PIG;sp|P36968|GPX4_PIG;sp|P36969-2|GPX4_HUMAN;sp|P36969|GPX4_HUMAN	sp|P36968-2|GPX4_PIG Isoform Cytoplasmic of Phospholipid hydroperoxide glutathione peroxidase OS=Sus scrofa OX=9823 GN=GPX4;sp|P36968|GPX4_PIG Phospholipid hydroperoxide glutathione peroxidase OS=Sus scrofa OX=9823 GN=GPX4 PE=1 SV=3;sp|P36969-2|GPX4_HUMAN
28.0024	28.3073	27.3468	27.9912	27.7336	28.0394	27.4693	28.0524	28.0273	27.6655	28.0086	27.9935	28.0634	27.9334	27.76	28.4835	28.1042	27.7884	28.3713	28.1175	27.8677	27.7489	28.1874	27.8122				10	10	10	50.6	50.6	50.6	45.347	0	272.77	5744900000	210	sp|P37111|ACY1_PIG;sp|Q03154-3|ACY1_HUMAN;sp|Q03154-4|ACY1_HUMAN;sp|Q03154|ACY1_HUMAN	sp|P37111|ACY1_PIG	sp|P37111|ACY1_PIG Aminoacylase-1 OS=Sus scrofa OX=9823 GN=ACY1 PE=1 SV=2
28.9491	27.5153	29.1117	28.6293	27.8803	28.0175	29.0001	28.0368	27.6596	28.1444	28.6929	28.6535	27.6627	26.9376	28.9299	25.8395	27.9992	27.3638	28.0497	27.1568	28.9509	26.9317	27.9041	27.351				6	6	6	42.7	42.7	42.7	22.391	0	323.31	7191400000	197	sp|P37802|TAGL2_HUMAN;sp|P37802-2|TAGL2_HUMAN	sp|P37802|TAGL2_HUMAN;sp|P37802-2|TAGL2_HUMAN	sp|P37802|TAGL2_HUMAN Transgelin-2 OS=Homo sapiens OX=9606 GN=TAGLN2 PE=1 SV=3;sp|P37802-2|TAGL2_HUMAN Isoform 2 of Transgelin-2 OS=Homo sapiens OX=9606 GN=TAGLN2
26.0136	25.8092	26.4342	25.0676	26.4382	24.8032	25.9248	25.6198	26.0216	26.1008	23.6823	25.3453	24.783	24.9438	25.3593	23.0859	27.1539	25.3789	24.8819	24.8157	25.9968	26.2106	25.1217	26.2928				2	2	2	14.5	14.5	14.5	37.54	0	9.8077	1389500000	244	sp|P37837|TALDO_HUMAN	sp|P37837|TALDO_HUMAN	sp|P37837|TALDO_HUMAN Transaldolase OS=Homo sapiens OX=9606 GN=TALDO1 PE=1 SV=2
29.6124	29.7578	29.1497	29.158	29.1459	29.9742	29.4808	29.5692	29.6035	28.3159	28.9111	29.1506	29.3039	29.3937	29.0415	29.2137	29.6124	28.4616	29.1751	28.6317	28.0659	29.1323	28.8148	29.9519				3	3	3	17.9	17.9	17.9	22.172	0	201.48	16232000000	144	sp|P38159-3|RBMX_HUMAN;sp|P38159|RBMX_HUMAN;sp|P38159-2|RBMX_HUMAN;sp|Q96E39|RMXL1_HUMAN;sp|O75526|RMXL2_HUMAN;sp|Q8N7X1|RMXL3_HUMAN	sp|P38159-3|RBMX_HUMAN;sp|P38159|RBMX_HUMAN;sp|P38159-2|RBMX_HUMAN;sp|Q96E39|RMXL1_HUMAN;sp|O75526|RMXL2_HUMAN	sp|P38159-3|RBMX_HUMAN Isoform 3 of RNA-binding motif protein, X chromosome OS=Homo sapiens OX=9606 GN=RBMX;sp|P38159|RBMX_HUMAN RNA-binding motif protein, X chromosome OS=Homo sapiens OX=9606 GN=RBMX PE=1 SV=3;sp|P38159-2|RBMX_HUMAN Isoform 2 of RNA-bindi
30.4615	30.7716	30.2987	30.3973	30.5544	30.6702	30.265	30.4221	30.6708	30.7391	30.3564	30.491	30.6487	30.6374	30.718	30.4595	30.5204	30.9021	30.5586	31.2607	30.1496	30.4921	30.5287	30.7294				27	27	4	66	66	11.2	68.303	0	323.31	37557000000	890	sp|P38606|VATA_HUMAN;sp|P38606-2|VATA_HUMAN	sp|P38606|VATA_HUMAN;sp|P38606-2|VATA_HUMAN	sp|P38606|VATA_HUMAN V-type proton ATPase catalytic subunit A OS=Homo sapiens OX=9606 GN=ATP6V1A PE=1 SV=2;sp|P38606-2|VATA_HUMAN Isoform 2 of V-type proton ATPase catalytic subunit A OS=Homo sapiens OX=9606 GN=ATP6V1A
29.7943	30.0701	29.694	29.7998	30.1197	29.836	29.6716	30.1737	30.4467	29.5597	29.9111	30.0414	29.9614	30.2832	29.6859	30.2506	30.1961	30.1665	30.1287	30.4154	29.6952	29.9898	29.8128	30.2717				13	13	13	35.2	35.2	35.2	73.68	0	323.31	26618000000	613	sp|P38646|GRP75_HUMAN	sp|P38646|GRP75_HUMAN	sp|P38646|GRP75_HUMAN Stress-70 protein, mitochondrial OS=Homo sapiens OX=9606 GN=HSPA9 PE=1 SV=2
27.9758	27.858	28.2753	27.0293	27.761	27.6625	27.797	27.5268	28.046	27.4872	27.4446	28.0362	28.2419	27.3694	27.1507	27.6679	27.0274	26.9614	27.2011	27.4832	30.2671	27.841	27.8045	27.2				4	4	4	24.3	24.3	24.3	14.984	0	91.08	5650500000	61	sp|Q29308|RS19_PIG;sp|P39019|RS19_HUMAN	sp|Q29308|RS19_PIG;sp|P39019|RS19_HUMAN	sp|Q29308|RS19_PIG 40S ribosomal protein S19 (Fragment) OS=Sus scrofa OX=9823 GN=RPS19 PE=2 SV=3;sp|P39019|RS19_HUMAN 40S ribosomal protein S19 OS=Homo sapiens OX=9606 GN=RPS19 PE=1 SV=2
26.7406	26.4257	27.071	26.6751	26.8598	27.1834	26.6253	26.6863	27.7095	27.5411	26.8776	27.0618	26.7415	26.6598	26.8483	26.2146	28.5975	26.71	27.1682	26.6041	26.9271	27.3378	26.5166	25.8972				3	3	3	11.9	11.9	11.9	46.108	0	181.88	4373300000	170	sp|P39023|RL3_HUMAN	sp|P39023|RL3_HUMAN	sp|P39023|RL3_HUMAN 60S ribosomal protein L3 OS=Homo sapiens OX=9606 GN=RPL3 PE=1 SV=2
25.6895	24.9784	26.7046	25.601	26.9889	26.3388	25.4583	23.8978	NaN	25.3889	25.8772	25.7636	26.8601	25.2394	26.2505	23.3094	NaN	25.134	25.745	25.3032	25.5548	26.043	25.8033	25.4333				8	2	2	30.9	8.8	8.8	50.8	0	6.1188	1287500000	33	sp|P39656|OST48_HUMAN;sp|P39656-2|OST48_HUMAN;sp|P39656-3|OST48_HUMAN	sp|P39656|OST48_HUMAN;sp|P39656-2|OST48_HUMAN;sp|P39656-3|OST48_HUMAN	sp|P39656|OST48_HUMAN Dolichyl-diphosphooligosaccharide--protein glycosyltransferase 48 kDa subunit OS=Homo sapiens OX=9606 GN=DDOST PE=1 SV=4;sp|P39656-2|OST48_HUMAN Isoform 2 of Dolichyl-diphosphooligosaccharide--protein glycosyltransferase 48 kDa subuni
24.9797	24.1852	24.4754	25.6393	24.7392	25.1859	24.9073	23.8031	26.2378	25.4083	25.4229	24.3008	25.1623	24.6942	24.8927	24.8051	NaN	23.145	23.7992	24.069	25.0466	23.4886	24.1733	23.8966				2	2	2	12.1	12.1	12.1	38.498	0	86.024	752330000	52	sp|P40121|CAPG_HUMAN;sp|P40121-2|CAPG_HUMAN	sp|P40121|CAPG_HUMAN;sp|P40121-2|CAPG_HUMAN	sp|P40121|CAPG_HUMAN Macrophage-capping protein OS=Homo sapiens OX=9606 GN=CAPG PE=1 SV=2;sp|P40121-2|CAPG_HUMAN Isoform 2 of Macrophage-capping protein OS=Homo sapiens OX=9606 GN=CAPG
29.1485	29.0418	28.7933	28.9342	30.1615	29.4926	28.8724	29.1568	28.9172	29.4697	29.1592	29.6741	29.0259	29.529	29.1604	28.8682	29.6786	29.1031	28.9071	30.0113	29.2149	29.3232	29.2883	29.1857				8	8	8	27.9	27.9	27.9	58.024	0	323.31	15591000000	372	sp|P40227|TCPZ_HUMAN;sp|P40227-2|TCPZ_HUMAN;sp|Q92526-2|TCPW_HUMAN;sp|Q92526|TCPW_HUMAN;sp|Q29236|TCPZ_PIG;sp|Q92526-3|TCPW_HUMAN	sp|P40227|TCPZ_HUMAN;sp|P40227-2|TCPZ_HUMAN	sp|P40227|TCPZ_HUMAN T-complex protein 1 subunit zeta OS=Homo sapiens OX=9606 GN=CCT6A PE=1 SV=3;sp|P40227-2|TCPZ_HUMAN Isoform 2 of T-complex protein 1 subunit zeta OS=Homo sapiens OX=9606 GN=CCT6A
26.2529	26.3987	26.3206	27.0619	26.4521	26.0651	26.4434	26.8114	25.9165	25.8531	26.5881	26.0222	26.0569	25.87	25.3607	24.0308	26.0106	26.0191	26.2527	25.6316	26.434	26.525	26.8632	26.2399				5	5	5	44.5	44.5	44.5	18.565	0	323.31	2021400000	144	sp|P40616-2|ARL1_HUMAN;sp|P40616|ARL1_HUMAN	sp|P40616-2|ARL1_HUMAN;sp|P40616|ARL1_HUMAN	sp|P40616-2|ARL1_HUMAN Isoform 2 of ADP-ribosylation factor-like protein 1 OS=Homo sapiens OX=9606 GN=ARL1;sp|P40616|ARL1_HUMAN ADP-ribosylation factor-like protein 1 OS=Homo sapiens OX=9606 GN=ARL1 PE=1 SV=1
27.3638	26.1751	27.6486	27.421	26.986	26.6151	26.5409	26.297	26.0597	26.0319	26.9623	26.8184	27.2502	26.5416	27.1383	27.7803	28.0827	26.9183	26.7934	27.5016	26.887	26.8236	27.3527	27.7231				7	7	7	26.3	26.3	26.3	51.109	0	48.209	3149700000	111	sp|P41091|IF2G_HUMAN;sp|Q2VIR3|IF2GL_HUMAN;sp|Q2VIR3-2|IF2GL_HUMAN	sp|P41091|IF2G_HUMAN;sp|Q2VIR3|IF2GL_HUMAN	sp|P41091|IF2G_HUMAN Eukaryotic translation initiation factor 2 subunit 3 OS=Homo sapiens OX=9606 GN=EIF2S3 PE=1 SV=3;sp|Q2VIR3|IF2GL_HUMAN Putative eukaryotic translation initiation factor 2 subunit 3-like protein OS=Homo sapiens OX=9606 GN=EIF2S3L PE=5 S
23.1399	23.6947	20.0406	24.3806	24.8489	23.5601	24.2087	23.5762	23.394	22.9037	23.313	24.2104	23.5442	22.6718	22.2444	23.6838	22.9922	NaN	NaN	21.9003	23.6084	23.6302	22.7361	22.8666				4	4	4	25.7	25.7	25.7	17	0	8.5625	350600000	58	sp|P41223|BUD31_HUMAN;sp|P41223-2|BUD31_HUMAN	sp|P41223|BUD31_HUMAN;sp|P41223-2|BUD31_HUMAN	sp|P41223|BUD31_HUMAN Protein BUD31 homolog OS=Homo sapiens OX=9606 GN=BUD31 PE=1 SV=2;sp|P41223-2|BUD31_HUMAN Isoform 2 of Protein BUD31 homolog OS=Homo sapiens OX=9606 GN=BUD31
26.2318	26.3341	26.5433	26.0789	26.2311	26.3869	26.2346	25.9755	26.4351	26.9518	26.3074	26.1104	25.8875	25.799	26.5881	25.2177	25.7022	26.3627	25.1452	25.7922	25.9919	26.198	25.777	26.0234				9	9	9	22.7	22.7	22.7	83.165	0	98.48	1623000000	140	sp|P41250|GARS_HUMAN	sp|P41250|GARS_HUMAN	sp|P41250|GARS_HUMAN Glycine--tRNA ligase OS=Homo sapiens OX=9606 GN=GARS PE=1 SV=3
26.5566	25.6523	25.8515	26.076	26.1025	26.1061	25.5782	26.4165	25.8098	24.0034	25.2336	26.176	25.7233	25.6864	24.5971	24.5229	23.0336	NaN	25.3207	24.5668	25.5024	25.9762	25.8853	24.8631				11	11	11	14	14	14	144.5	0	20.266	1400100000	78	sp|P41252|SYIC_HUMAN	sp|P41252|SYIC_HUMAN	sp|P41252|SYIC_HUMAN Isoleucine--tRNA ligase, cytoplasmic OS=Homo sapiens OX=9606 GN=IARS PE=1 SV=2
27.1879	25.4931	26.6064	26.1662	26.6273	26.5356	26.7085	26.0913	25.4494	25.7901	26.6716	26.6592	26.0547	26.1966	25.5378	25.0506	26.5799	26.6652	26.2791	27.4137	26.313	26.495	27.5603	27.0401				7	7	6	26.8	26.8	24.7	46.485	0	106.49	2214200000	134	sp|P41367|ACADM_PIG	sp|P41367|ACADM_PIG	sp|P41367|ACADM_PIG Medium-chain specific acyl-CoA dehydrogenase, mitochondrial OS=Sus scrofa OX=9823 GN=ACADM PE=1 SV=3
26.5322	26.3114	26.2753	26.1414	26.3314	26.6442	26.1529	26.9925	26.4264	26.9525	26.0124	26.3306	26.8371	26.0579	26.7574	26.5508	26.7776	26.1894	26.2955	26.7214	26.1455	26.2959	26.2327	26.0087				6	3	3	74.3	40.7	40.7	12.732	0	41.782	1811500000	90	sp|P41567|EIF1_HUMAN	sp|P41567|EIF1_HUMAN	sp|P41567|EIF1_HUMAN Eukaryotic translation initiation factor 1 OS=Homo sapiens OX=9606 GN=EIF1 PE=1 SV=1
26.2241	25.8962	26.4047	25.4486	26.6409	26.6364	26.2676	27.0312	26.6082	26.9459	26.5008	26.4955	26.1707	26.582	26.3186	25.375	25.7366	25.9697	26.8494	25.8959	26.2986	26.0427	26.5557	26.6918				6	3	3	29	16	16	42.293	0	57.263	2256600000	107	sp|P42025|ACTY_HUMAN	sp|P42025|ACTY_HUMAN	sp|P42025|ACTY_HUMAN Beta-centractin OS=Homo sapiens OX=9606 GN=ACTR1B PE=1 SV=1
28.9478	28.8127	29.2344	28.8345	28.9231	28.7601	28.8908	28.9298	29.0566	28.4831	29.0634	29.1742	28.5953	28.6327	28.9497	29.3755	29.281	29.222	29.031	29.115	29.3134	28.7274	29.1474	29.5142				4	4	4	21.4	21.4	21.4	38.737	0	323.31	11535000000	144	sp|P42167-2|LAP2B_HUMAN;sp|P42167|LAP2B_HUMAN;sp|P42167-3|LAP2B_HUMAN;sp|P42166|LAP2A_HUMAN	sp|P42167-2|LAP2B_HUMAN;sp|P42167|LAP2B_HUMAN;sp|P42167-3|LAP2B_HUMAN;sp|P42166|LAP2A_HUMAN	sp|P42167-2|LAP2B_HUMAN Isoform Gamma of Lamina-associated polypeptide 2, isoforms beta/gamma OS=Homo sapiens OX=9606 GN=TMPO;sp|P42167|LAP2B_HUMAN Lamina-associated polypeptide 2, isoforms beta/gamma OS=Homo sapiens OX=9606 GN=TMPO PE=1 SV=2;sp|P42167-3|L
24.5729	24.7154	24.4967	24.3191	23.3784	24.1455	24.3467	24.1442	23.7363	24.7512	24.7335	23.2252	24.0336	23.5973	23.8741	NaN	24.0846	22.6569	23.7146	24.6837	24.2079	24.5803	23.6243	24.0997				8	8	8	12.5	12.5	12.5	117.8	0	23.773	499470000	67	sp|P42285|MTREX_HUMAN	sp|P42285|MTREX_HUMAN	sp|P42285|MTREX_HUMAN Exosome RNA helicase MTR4 OS=Homo sapiens OX=9606 GN=MTREX PE=1 SV=3
25.8165	25.5007	25.4579	25.3117	24.6029	26.061	25.3044	25.8015	25.8672	25.5863	25.7002	26.0326	25.3824	25.3015	25.8354	NaN	25.5267	25.4212	25.4637	25.4526	24.8369	25.5607	25.3654	25.0513				21	21	21	15.3	15.3	15.3	288.89	0	66.301	917320000	179	sp|P42345|MTOR_HUMAN	sp|P42345|MTOR_HUMAN	sp|P42345|MTOR_HUMAN Serine/threonine-protein kinase mTOR OS=Homo sapiens OX=9606 GN=MTOR PE=1 SV=1
24.4841	24.4138	24.3885	25.6356	25.6103	25.0453	24.4194	25.0506	24.6208	25.535	25.3589	24.6791	24.6122	24.9346	24.5448	23.999	23.9817	24.6103	23.8947	25.144	24.2176	24.2177	24.5662	24.713				10	10	10	8	8	8	236.83	0	29.157	703750000	86	sp|P42356|PI4KA_HUMAN;sp|P42356-2|PI4KA_HUMAN;sp|Q8N8J0|PI4P1_HUMAN;sp|A4QPH2-2|PI4P2_HUMAN;sp|A4QPH2-4|PI4P2_HUMAN;sp|A4QPH2|PI4P2_HUMAN	sp|P42356|PI4KA_HUMAN	sp|P42356|PI4KA_HUMAN Phosphatidylinositol 4-kinase alpha OS=Homo sapiens OX=9606 GN=PI4KA PE=1 SV=4
24.2174	23.6243	24.2024	24.4852	22.6237	23.5519	24.3243	22.8749	24.3825	22.4931	24.1383	23.9359	24.5588	23.5644	23.7081	22.372	25.8771	24.041	23.2772	NaN	24.0513	24.0439	23.872	24.8319				4	4	4	5.7	5.7	5.7	98.655	0	46.757	398680000	32	sp|P42566|EPS15_HUMAN;sp|P42566-2|EPS15_HUMAN	sp|P42566|EPS15_HUMAN	sp|P42566|EPS15_HUMAN Epidermal growth factor receptor substrate 15 OS=Homo sapiens OX=9606 GN=EPS15 PE=1 SV=2
25.7935	26.135	24.8129	24.4167	24.8109	24.9107	25.3423	26.0568	25.1171	23.8476	24.561	24.4449	24.8721	25.3098	25.3878	26.1704	24.7395	24.2134	25.1378	25.2462	25.3541	25.3181	25.1536	26.2653				5	5	5	3.8	3.8	3.8	157.9	0	235.35	1222400000	96	sp|P42704|LPPRC_HUMAN	sp|P42704|LPPRC_HUMAN	sp|P42704|LPPRC_HUMAN Leucine-rich PPR motif-containing protein, mitochondrial OS=Homo sapiens OX=9606 GN=LRPPRC PE=1 SV=3
23.4944	23.7038	22.6248	23.4091	22.8829	24.5463	23.285	22.9244	24.2616	23.1861	23.2084	22.606	21.8631	24.0682	23.078	NaN	NaN	22.6533	22.7144	21.8249	23.377	23.057	22.6535	22.1483				7	7	7	3.8	3.8	3.8	347.6	0	13.209	199780000	31	sp|P42858|HD_HUMAN	sp|P42858|HD_HUMAN	sp|P42858|HD_HUMAN Huntingtin OS=Homo sapiens OX=9606 GN=HTT PE=1 SV=2
30.7604	30.3181	30.5326	30.2932	29.8891	30.0581	30.8671	30.2331	30.1481	30.8712	30.1084	30.634	29.8071	30.6855	30.4698	30.4515	30.6762	29.7391	30.4188	30.3183	29.4305	29.8252	30.5388	29.9985				6	6	6	19.1	19.1	19.1	55.148	0	323.31	39592000000	409	sp|P43003-2|EAA1_HUMAN;sp|P43003|EAA1_HUMAN;sp|P48664-2|EAA4_HUMAN;sp|P48664|EAA4_HUMAN	sp|P43003-2|EAA1_HUMAN;sp|P43003|EAA1_HUMAN	sp|P43003-2|EAA1_HUMAN Isoform 2 of Excitatory amino acid transporter 1 OS=Homo sapiens OX=9606 GN=SLC1A3;sp|P43003|EAA1_HUMAN Excitatory amino acid transporter 1 OS=Homo sapiens OX=9606 GN=SLC1A3 PE=1 SV=1
24.6873	25.1529	24.3514	22.0155	24.6438	23.8679	24.7928	24.682	22.5161	25.1552	24.3078	24.0827	23.8998	24.1896	25.5788	NaN	23.8899	24.5022	23.4556	24.4831	NaN	24.7953	24.2961	23.5155				5	5	5	13.9	13.9	13.9	61.007	0	254.68	556610000	102	sp|P43004-3|EAA2_HUMAN;sp|P43004-2|EAA2_HUMAN;sp|P43004|EAA2_HUMAN	sp|P43004-3|EAA2_HUMAN;sp|P43004-2|EAA2_HUMAN;sp|P43004|EAA2_HUMAN	sp|P43004-3|EAA2_HUMAN Isoform 3 of Excitatory amino acid transporter 2 OS=Homo sapiens OX=9606 GN=SLC1A2;sp|P43004-2|EAA2_HUMAN Isoform 2 of Excitatory amino acid transporter 2 OS=Homo sapiens OX=9606 GN=SLC1A2;sp|P43004|EAA2_HUMAN Excitatory amino acid t
25.9304	26.2603	25.0193	24.294	26.2743	25.6419	25.7399	25.8863	26.184	26.3367	25.568	25.9116	25.4903	26.3087	25.8117	NaN	25.6279	26.1931	25.0337	26.8002	25.4501	25.6646	25.2893	26.2861				5	5	5	13.7	13.7	13.7	55.722	0	26.097	1601100000	135	sp|P43007|SATT_HUMAN;sp|P43007-2|SATT_HUMAN	sp|P43007|SATT_HUMAN	sp|P43007|SATT_HUMAN Neutral amino acid transporter A OS=Homo sapiens OX=9606 GN=SLC1A4 PE=1 SV=1
26.6535	25.9664	26.5533	26.0307	25.8767	25.6842	26.5538	26.1036	26.4275	26.7058	26.7307	26.1055	25.7696	25.5584	26.0048	NaN	26.9327	25.5507	26.8598	26.1459	26.0901	26.103	26.6255	26.3443				6	6	6	24.1	24.1	24.1	46.654	0	30.663	1710100000	33	sp|Q9GL51|LIS1_PIG;sp|P43034|LIS1_HUMAN;sp|P43034-2|LIS1_HUMAN	sp|Q9GL51|LIS1_PIG;sp|P43034|LIS1_HUMAN	sp|Q9GL51|LIS1_PIG Platelet-activating factor acetylhydrolase IB subunit alpha OS=Sus scrofa OX=9823 GN=PAFAH1B1 PE=2 SV=3;sp|P43034|LIS1_HUMAN Platelet-activating factor acetylhydrolase IB subunit alpha OS=Homo sapiens OX=9606 GN=PAFAH1B1 PE=1 SV=2
25.2278	24.2233	NaN	25.4759	25.0498	25.365	24.7712	25.2527	NaN	22.5919	25.0285	24.927	25.0301	25.4153	24.9169	25.3976	24.5831	26.0849	24.5716	25.1028	24.4991	24.3819	24.5999	25.9651				2	2	2	12.9	12.9	12.9	22.919	0	323.31	901630000	73	sp|P43080|GUC1A_HUMAN	sp|P43080|GUC1A_HUMAN	sp|P43080|GUC1A_HUMAN Guanylyl cyclase-activating protein 1 OS=Homo sapiens OX=9606 GN=GUCA1A PE=1 SV=3
30.3683	30.2588	30.0335	30.1075	29.5762	30.6154	30.1693	30.063	30.3817	29.8017	30.1284	30.1433	29.4584	29.2896	30.2317	29.3016	30.1671	29.6551	29.9509	29.3933	30.1035	29.8406	29.8351	30.0173				10	10	10	21.6	21.6	21.6	94.622	0	323.31	28104000000	357	sp|P43243|MATR3_HUMAN;sp|P43243-2|MATR3_HUMAN	sp|P43243|MATR3_HUMAN;sp|P43243-2|MATR3_HUMAN	sp|P43243|MATR3_HUMAN Matrin-3 OS=Homo sapiens OX=9606 GN=MATR3 PE=1 SV=2;sp|P43243-2|MATR3_HUMAN Isoform 2 of Matrin-3 OS=Homo sapiens OX=9606 GN=MATR3
24.4914	24.0573	NaN	24.7058	25.1643	25.0139	24.6228	25.1003	24.4213	25.1705	25.0442	24.8506	24.4276	24.5772	24.727	23.2245	24.9895	24.1336	23.6503	24.5125	23.6996	24.7101	24.1317	23.9162				7	7	7	13.2	13.2	13.2	104.74	0	53.763	461130000	104	sp|P43246|MSH2_HUMAN;sp|P43246-2|MSH2_HUMAN	sp|P43246|MSH2_HUMAN;sp|P43246-2|MSH2_HUMAN	sp|P43246|MSH2_HUMAN DNA mismatch repair protein Msh2 OS=Homo sapiens OX=9606 GN=MSH2 PE=1 SV=1;sp|P43246-2|MSH2_HUMAN Isoform 2 of DNA mismatch repair protein Msh2 OS=Homo sapiens OX=9606 GN=MSH2
26.2291	26.8403	26.4272	26.4019	27.2814	26.5659	26.1614	27.1107	26.0002	26.1604	26.3341	26.8175	26.4571	26.6875	26.3971	26.8364	25.4262	26.7452	26.9774	26.1511	25.4905	26.663	26.7192	26.5023				11	11	11	27.1	27.1	27.1	67.531	0	118.24	2370600000	216	sp|P43304-2|GPDM_HUMAN;sp|P43304|GPDM_HUMAN	sp|P43304-2|GPDM_HUMAN;sp|P43304|GPDM_HUMAN	sp|P43304-2|GPDM_HUMAN Isoform 2 of Glycerol-3-phosphate dehydrogenase, mitochondrial OS=Homo sapiens OX=9606 GN=GPD2;sp|P43304|GPDM_HUMAN Glycerol-3-phosphate dehydrogenase, mitochondrial OS=Homo sapiens OX=9606 GN=GPD2 PE=1 SV=3
27.2403	25.6063	25.5634	28.2527	25.4504	25.2911	27.1966	26.2447	25.6931	27.8306	25.8681	25.5879	25.6585	26.5549	25.6225	26.1887	27.7694	26.8861	26.5314	27.0704	28.0344	28.1428	26.9337	27.1797				4	4	4	26.8	26.8	26.8	23.38	0	198.52	2748100000	102	sp|P43320|CRBB2_HUMAN	sp|P43320|CRBB2_HUMAN	sp|P43320|CRBB2_HUMAN Beta-crystallin B2 OS=Homo sapiens OX=9606 GN=CRYBB2 PE=1 SV=2
25.5534	24.6908	24.7005	24.0419	24.5436	25.1818	25.3321	24.9291	NaN	24.6584	24.4361	26.5257	24.715	24.7666	25.2709	24.4012	24.6091	25.6689	25.6203	24.6714	25.0689	23.9944	24.3546	24.3886				9	4	4	47.2	25.9	25.9	37.808	0	44.118	626900000	62	sp|P43367|CAN2_PIG	sp|P43367|CAN2_PIG	sp|P43367|CAN2_PIG Calpain-2 catalytic subunit (Fragment) OS=Sus scrofa OX=9823 GN=CAPN2 PE=2 SV=2
26.6523	27.4346	27.3057	26.6037	26.8192	26.9428	26.1225	27.1529	27.0876	27.0087	27.5241	27.4792	27.0716	27.0003	27	26.6763	27.5491	27.6542	27.8965	27.4498	27.7354	27.4385	27.1303	27.5088				2	2	2	11	11	11	23.239	0	26.435	4174500000	59	sp|P43487-2|RANG_HUMAN;sp|P43487|RANG_HUMAN	sp|P43487-2|RANG_HUMAN;sp|P43487|RANG_HUMAN	sp|P43487-2|RANG_HUMAN Isoform 2 of Ran-specific GTPase-activating protein OS=Homo sapiens OX=9606 GN=RANBP1;sp|P43487|RANG_HUMAN Ran-specific GTPase-activating protein OS=Homo sapiens OX=9606 GN=RANBP1 PE=1 SV=1
28.0899	27.9336	28.1472	28.1802	28.2345	28.1384	27.8119	27.7565	27.7958	28.3151	28.2671	28.6975	27.7574	28.1641	27.8995	27.77	28.0762	28.1315	27.7647	28.199	28.0146	27.8067	27.8601	27.7771				11	11	11	49.3	49.3	49.3	47.366	0	248.21	6400800000	330	sp|P43686|PRS6B_HUMAN;sp|P43686-2|PRS6B_HUMAN	sp|P43686|PRS6B_HUMAN;sp|P43686-2|PRS6B_HUMAN	sp|P43686|PRS6B_HUMAN 26S proteasome regulatory subunit 6B OS=Homo sapiens OX=9606 GN=PSMC4 PE=1 SV=2;sp|P43686-2|PRS6B_HUMAN Isoform 2 of 26S proteasome regulatory subunit 6B OS=Homo sapiens OX=9606 GN=PSMC4
29.1987	29.0072	29.4646	28.6059	29.1215	29.1711	29.0963	29.0323	28.7281	29.3116	29.5432	29.0674	28.7228	29.2875	29.0267	29.1485	28.7921	28.7248	28.6553	28.4657	28.7956	28.6748	28.6524	28.6398				18	18	17	38	38	36.8	93.307	0	323.31	12345000000	573	sp|P45974-2|UBP5_HUMAN;sp|P45974|UBP5_HUMAN	sp|P45974-2|UBP5_HUMAN;sp|P45974|UBP5_HUMAN	sp|P45974-2|UBP5_HUMAN Isoform Short of Ubiquitin carboxyl-terminal hydrolase 5 OS=Homo sapiens OX=9606 GN=USP5;sp|P45974|UBP5_HUMAN Ubiquitin carboxyl-terminal hydrolase 5 OS=Homo sapiens OX=9606 GN=USP5 PE=1 SV=2
25.3827	25.3236	25.1375	24.6792	25.2052	25.4369	24.8611	24.9048	24.9625	25.8534	25.9065	25.7924	25.1247	25.3932	25.8261	NaN	25.6073	24.9916	25.4131	25.4865	25.7094	25.3095	25.0762	25.3363				6	6	6	22.6	22.6	22.6	44.287	0	322.13	803040000	131	sp|P45985|MP2K4_HUMAN;sp|P45985-2|MP2K4_HUMAN	sp|P45985|MP2K4_HUMAN;sp|P45985-2|MP2K4_HUMAN	sp|P45985|MP2K4_HUMAN Dual specificity mitogen-activated protein kinase kinase 4 OS=Homo sapiens OX=9606 GN=MAP2K4 PE=1 SV=1;sp|P45985-2|MP2K4_HUMAN Isoform 2 of Dual specificity mitogen-activated protein kinase kinase 4 OS=Homo sapiens OX=9606 GN=MAP2K4
26.7187	26.6041	26.2561	26.2907	27.2152	26.5218	26.6948	26.3822	26.559	26.4988	26.6648	26.9358	26.5529	26.6356	26.5145	27.3472	26.3227	26.3325	26.7052	26.8647	26.7369	26.6004	26.0365	26.4579				5	5	5	25.7	25.7	25.7	33.83	0	200.54	2276900000	122	sp|P46108|CRK_HUMAN;sp|P46108-2|CRK_HUMAN	sp|P46108|CRK_HUMAN;sp|P46108-2|CRK_HUMAN	sp|P46108|CRK_HUMAN Adapter molecule crk OS=Homo sapiens OX=9606 GN=CRK PE=1 SV=2;sp|P46108-2|CRK_HUMAN Isoform Crk-I of Adapter molecule crk OS=Homo sapiens OX=9606 GN=CRK
26.6373	26.574	27.0408	26.4282	25.7606	26.2291	26.5782	26.2436	24.7803	26.631	26.3782	26.175	25.8811	26.3994	26.7434	26.2999	25.409	26.03	26.3043	25.9294	26.7976	26.2723	26.6729	26.2343				7	7	7	32.7	32.7	32.7	33.777	0	29.024	1991000000	160	sp|P46109|CRKL_HUMAN	sp|P46109|CRKL_HUMAN	sp|P46109|CRKL_HUMAN Crk-like protein OS=Homo sapiens OX=9606 GN=CRKL PE=1 SV=1
33.4248	33.7819	32.2289	33.6306	33.7027	33.7747	33.225	33.5406	34.289	33.9305	33.2901	33.8073	33.8069	34.0648	33.7613	34.3762	34.2317	34.0769	33.9476	34.3874	33.1683	34.2193	33.6732	34.2346				11	11	5	49.6	49.6	26.8	42.03	0	323.31	411670000000	1528	sp|P46410|GLNA_PIG	sp|P46410|GLNA_PIG	sp|P46410|GLNA_PIG Glutamine synthetase OS=Sus scrofa OX=9823 GN=GLUL PE=2 SV=3
30.4632	30.5968	29.551	30.4474	30.2521	30.5203	30.2536	30.7106	30.5869	30.4972	30.1389	29.8053	30.4132	30.7619	30.2664	30.8071	30.7985	30.5635	30.9283	30.5537	30.6049	30.6909	30.5147	30.8863				21	21	21	44.8	44.8	44.8	82.593	0	323.31	40445000000	585	sp|P46459|NSF_HUMAN;sp|P46459-2|NSF_HUMAN	sp|P46459|NSF_HUMAN;sp|P46459-2|NSF_HUMAN	sp|P46459|NSF_HUMAN Vesicle-fusing ATPase OS=Homo sapiens OX=9606 GN=NSF PE=1 SV=3;sp|P46459-2|NSF_HUMAN Isoform 2 of Vesicle-fusing ATPase OS=Homo sapiens OX=9606 GN=NSF
27.5168	27.7466	26.8919	25.9483	26.0275	27.0721	27.9319	27.6883	26.6498	27.8093	26.1229	28.3527	27.6674	27.1938	26.6112	26.3786	23.1137	26.3713	27.4109	25.9131	25.7869	25.9868	27.3869	27.5827				2	2	2	14.2	14.2	14.2	16.561	0.00035398	4.804	4313400000	56	sp|P46776|RL27A_HUMAN	sp|P46776|RL27A_HUMAN	sp|P46776|RL27A_HUMAN 60S ribosomal protein L27a OS=Homo sapiens OX=9606 GN=RPL27A PE=1 SV=2
27.173	26.4327	26.492	26.8399	26.3403	26.5992	27.1779	27.4404	27.2253	26.8174	26.2636	26.44	26.7363	26.8497	27.1355	26.4454	26.741	26.8171	27.1366	27.2046	27.0327	26.6304	27.3945	26.8303				4	4	4	26.9	26.9	26.9	34.362	0	158.56	3418200000	100	sp|P46777|RL5_HUMAN;sp|Q95276|RL5_PIG	sp|P46777|RL5_HUMAN;sp|Q95276|RL5_PIG	sp|P46777|RL5_HUMAN 60S ribosomal protein L5 OS=Homo sapiens OX=9606 GN=RPL5 PE=1 SV=3;sp|Q95276|RL5_PIG 60S ribosomal protein L5 (Fragment) OS=Sus scrofa OX=9823 GN=RPL5 PE=2 SV=3
27.3348	28.3067	26.508	27.2874	26.0732	25.6956	27.9275	27.6075	27.0077	26.0967	26.6242	26.1645	27.7409	26.9828	26.1113	26.4318	NaN	27.1606	26.1544	25.913	25.6725	26.5288	26.9851	27.1311				4	4	4	14.9	14.9	14.9	22.591	0	7.349	3619100000	78	sp|P46781|RS9_HUMAN;sp|Q29197|RS9_PIG	sp|P46781|RS9_HUMAN;sp|Q29197|RS9_PIG	sp|P46781|RS9_HUMAN 40S ribosomal protein S9 OS=Homo sapiens OX=9606 GN=RPS9 PE=1 SV=3;sp|Q29197|RS9_PIG 40S ribosomal protein S9 (Fragment) OS=Sus scrofa OX=9823 GN=RPS9 PE=2 SV=1
27.8476	27.5917	28.1099	28.3053	27.5176	27.6243	27.4651	27.589	28.2515	28.1464	27.8987	28.0692	26.9802	27.7669	28.208	27.5509	27.9774	28.8844	27.4996	27.5923	27.76	27.5186	27.8618	27.5009				4	4	4	31.9	31.9	31.9	22.876	0	323.31	5468300000	151	sp|P46782|RS5_HUMAN	sp|P46782|RS5_HUMAN	sp|P46782|RS5_HUMAN 40S ribosomal protein S5 OS=Homo sapiens OX=9606 GN=RPS5 PE=1 SV=4
26.8586	27.0459	28.0073	27.5172	25.4706	27.7624	26.7201	27.2619	27.7359	26.1112	25.5605	25.9902	25.866	26.6209	26.2412	25.7017	26.8686	26.1747	26.5614	26.8674	27.0905	26.7038	25.9642	26.137				4	4	4	32.1	32.1	32.1	18.898	0	31.206	3207100000	143	sp|P46783|RS10_HUMAN;sp|Q9NQ39|RS10L_HUMAN	sp|P46783|RS10_HUMAN	sp|P46783|RS10_HUMAN 40S ribosomal protein S10 OS=Homo sapiens OX=9606 GN=RPS10 PE=1 SV=1
31.2781	31.2104	31.3961	31.4394	31.0428	31.1935	31.2447	31.3535	31.448	31.3026	31.3411	31.3416	31.0946	31.0972	31.3744	31.2791	31.2629	31.0558	31.2791	30.9874	31.4765	30.8807	31.3966	31.169				29	29	28	19	19	18.6	270.63	0	323.31	61026000000	1091	sp|P46821|MAP1B_HUMAN	sp|P46821|MAP1B_HUMAN	sp|P46821|MAP1B_HUMAN Microtubule-associated protein 1B OS=Homo sapiens OX=9606 GN=MAP1B PE=1 SV=2
28.6411	27.6136	29.1836	28.8612	27.7859	27.8569	28.5699	27.6591	27.8145	27.994	28.8027	27.861	27.7129	26.946	28.477	27.5267	27.4381	27.1711	27.9744	27.314	28.3777	27.4931	27.9415	27.7312				27	27	26	24.1	24.1	23.5	189.25	0	323.31	5868100000	317	sp|P46940|IQGA1_HUMAN;sp|Q86VI3|IQGA3_HUMAN	sp|P46940|IQGA1_HUMAN	sp|P46940|IQGA1_HUMAN Ras GTPase-activating-like protein IQGAP1 OS=Homo sapiens OX=9606 GN=IQGAP1 PE=1 SV=1
26.6394	26.1628	25.9171	25.8417	26.5032	26.2983	26.6829	26.1802	25.4282	27.7138	26.7199	26.0334	26.341	25.4999	26.0922	26.4651	26.2075	24.3793	25.8739	25.7417	27.307	26.8171	26.7548	26.6931				3	3	3	10.8	10.8	10.8	37.478	0	99.045	2152500000	114	sp|P46976-2|GLYG_HUMAN;sp|P46976|GLYG_HUMAN;sp|P46976-3|GLYG_HUMAN	sp|P46976-2|GLYG_HUMAN;sp|P46976|GLYG_HUMAN	sp|P46976-2|GLYG_HUMAN Isoform GN-1 of Glycogenin-1 OS=Homo sapiens OX=9606 GN=GYG1;sp|P46976|GLYG_HUMAN Glycogenin-1 OS=Homo sapiens OX=9606 GN=GYG1 PE=1 SV=4
26.0087	26.0955	26.3741	25.2084	26.7979	26.6436	26.4757	25.98	25.7464	27.478	26.5578	25.2928	25.8703	26.6972	25.721	27.8606	26.685	26.0712	26.2351	24.9121	26.0103	26.4994	26.0995	25.622				9	9	9	16	16	16	80.529	0	60.156	1942100000	106	sp|P46977|STT3A_HUMAN;sp|P46977-2|STT3A_HUMAN	sp|P46977|STT3A_HUMAN;sp|P46977-2|STT3A_HUMAN	sp|P46977|STT3A_HUMAN Dolichyl-diphosphooligosaccharide--protein glycosyltransferase subunit STT3A OS=Homo sapiens OX=9606 GN=STT3A PE=1 SV=2;sp|P46977-2|STT3A_HUMAN Isoform 2 of Dolichyl-diphosphooligosaccharide--protein glycosyltransferase subunit STT3A
25.2117	25.9732	25.7799	25.5025	26.013	25.8289	25.4914	25.3219	25.9499	26.183	25.1692	26.1633	25.2254	27.0311	26.1022	28.1501	25.8277	25.4987	26.0404	26.1311	25.8985	25.9338	25.539	25.4899				9	9	9	25.6	25.6	25.6	73.361	0	107.94	1658100000	109	sp|P47736|RPGP1_HUMAN;sp|P47736-3|RPGP1_HUMAN;sp|P47736-4|RPGP1_HUMAN;sp|P47736-2|RPGP1_HUMAN	sp|P47736|RPGP1_HUMAN;sp|P47736-3|RPGP1_HUMAN;sp|P47736-4|RPGP1_HUMAN;sp|P47736-2|RPGP1_HUMAN	sp|P47736|RPGP1_HUMAN Rap1 GTPase-activating protein 1 OS=Homo sapiens OX=9606 GN=RAP1GAP PE=1 SV=2;sp|P47736-3|RPGP1_HUMAN Isoform 3 of Rap1 GTPase-activating protein 1 OS=Homo sapiens OX=9606 GN=RAP1GAP;sp|P47736-4|RPGP1_HUMAN Isoform 4 of Rap1 GTPase-ac
28.2807	28.602	28.9709	28.0614	28.4103	28.2213	28.4201	28.3769	29.0557	28.337	28.4002	28.2108	28.4896	28.1217	28.3187	26.6799	28.2787	28.3124	28.3355	28.5705	28.7329	27.9909	28.3922	28.5674				9	9	9	47.8	47.8	47.8	30.628	0	109.56	7804300000	176	sp|P47756-2|CAPZB_HUMAN;sp|P47756|CAPZB_HUMAN;sp|A0PFK7|CAPZB_PIG	sp|P47756-2|CAPZB_HUMAN;sp|P47756|CAPZB_HUMAN;sp|A0PFK7|CAPZB_PIG	sp|P47756-2|CAPZB_HUMAN Isoform 2 of F-actin-capping protein subunit beta OS=Homo sapiens OX=9606 GN=CAPZB;sp|P47756|CAPZB_HUMAN F-actin-capping protein subunit beta OS=Homo sapiens OX=9606 GN=CAPZB PE=1 SV=4;sp|A0PFK7|CAPZB_PIG F-actin-capping protein sub
27.5096	26.7827	27.3277	26.9045	26.4536	27.2424	27.0271	26.6106	27.7926	27.9562	27.1787	26.7684	26.7125	26.7057	27.1465	23.7183	26.9372	27.3125	27.0675	24.9705	27.4597	26.9859	27.0078	27.2399				10	10	10	22.9	22.9	22.9	78.143	0	323.31	3382100000	159	sp|P47788|THOP1_PIG;sp|P52888|THOP1_HUMAN	sp|P47788|THOP1_PIG	sp|P47788|THOP1_PIG Thimet oligopeptidase OS=Sus scrofa OX=9823 GN=THOP1 PE=2 SV=2
28.6821	29.3644	27.7167	28.8195	26.9265	26.7125	28.8174	29.2018	31.4462	27.4317	26.0477	29.2739	28.1778	28.1365	27.3384	28.7941	27.5701	27.9778	28.3311	28.0424	28.4465	29.0833	28.719	29.5029				2	2	2	14.8	14.8	14.8	31.874	0.00062383	3.1781	14877000000	64	sp|P47804|RGR_HUMAN;sp|P47804-2|RGR_HUMAN;sp|P47804-3|RGR_HUMAN	sp|P47804|RGR_HUMAN;sp|P47804-2|RGR_HUMAN;sp|P47804-3|RGR_HUMAN	sp|P47804|RGR_HUMAN RPE-retinal G protein-coupled receptor OS=Homo sapiens OX=9606 GN=RGR PE=1 SV=1;sp|P47804-2|RGR_HUMAN Isoform 2 of RPE-retinal G protein-coupled receptor OS=Homo sapiens OX=9606 GN=RGR;sp|P47804-3|RGR_HUMAN Isoform 3 of RPE-retinal G pr
23.3251	23.3317	23.7316	23.3577	24.1153	24.1493	22.9331	23.662	24.0613	23.9773	23.0876	25.7872	23.0631	24.9919	23.8264	24.4266	23.8197	24.0984	24.55	23.9616	NaN	24.2192	23.5789	23.9898				4	4	2	9.1	9.1	5.5	54.606	0.00035348	4.7689	394830000	42	sp|P47870-1|GBRB2_HUMAN;sp|P47870|GBRB2_HUMAN;sp|P47870-3|GBRB2_HUMAN;sp|P47870-4|GBRB2_HUMAN;sp|P18505|GBRB1_HUMAN	sp|P47870-1|GBRB2_HUMAN;sp|P47870|GBRB2_HUMAN;sp|P47870-3|GBRB2_HUMAN;sp|P47870-4|GBRB2_HUMAN;sp|P18505|GBRB1_HUMAN	sp|P47870-1|GBRB2_HUMAN Isoform 2 of Gamma-aminobutyric acid receptor subunit beta-2 OS=Homo sapiens OX=9606 GN=GABRB2;sp|P47870|GBRB2_HUMAN Gamma-aminobutyric acid receptor subunit beta-2 OS=Homo sapiens OX=9606 GN=GABRB2 PE=1 SV=2;sp|P47870-3|GBRB2_HUMAN
26.0956	26.3576	24.9418	26.5929	25.6292	26.096	26.6143	26.0212	25.6395	24.4378	26.1642	26.2225	25.9198	25.9417	25.2287	NaN	25.0722	24.9763	26.5737	25.6286	26.0831	25.646	25.9217	26.6002				5	5	5	9.2	9.2	9.2	86.578	0	10.253	1828800000	71	sp|P47897-2|SYQ_HUMAN;sp|P47897|SYQ_HUMAN	sp|P47897-2|SYQ_HUMAN;sp|P47897|SYQ_HUMAN	sp|P47897-2|SYQ_HUMAN Isoform 2 of Glutamine--tRNA ligase OS=Homo sapiens OX=9606 GN=QARS;sp|P47897|SYQ_HUMAN Glutamine--tRNA ligase OS=Homo sapiens OX=9606 GN=QARS PE=1 SV=1
25.8964	23.7112	22.8444	25.9509	26.498	25.27	25.7135	24.6631	26.5511	26.3938	22.9762	26.2706	23.6559	23.4244	24.875	27.4835	26.4941	26.2028	NaN	25.8056	24.1538	25.9595	26.3641	25.8465				3	3	3	6.8	6.8	6.8	70.605	0	64.865	1847200000	45	sp|P48066|S6A11_HUMAN;sp|P48066-2|S6A11_HUMAN	sp|P48066|S6A11_HUMAN	sp|P48066|S6A11_HUMAN Sodium- and chloride-dependent GABA transporter 3 OS=Homo sapiens OX=9606 GN=SLC6A11 PE=2 SV=1
24.4098	24.5215	23.5506	24.5027	25.4942	25.2217	23.6475	24.2588	24.7055	25.1762	23.636	25.146	23.9698	25.8185	25.0069	25.1068	25.0839	25.6479	24.2536	26.4003	24.7095	24.5701	23.5087	24.457				9	9	9	31.1	31.1	31.1	66.894	0	91.417	577140000	85	sp|P48319|DCE1_PIG;sp|Q99259|DCE1_HUMAN;sp|Q99259-4|DCE1_HUMAN;sp|Q99259-3|DCE1_HUMAN	sp|P48319|DCE1_PIG;sp|Q99259|DCE1_HUMAN	sp|P48319|DCE1_PIG Glutamate decarboxylase 1 OS=Sus scrofa OX=9823 GN=GAD1 PE=2 SV=1;sp|Q99259|DCE1_HUMAN Glutamate decarboxylase 1 OS=Homo sapiens OX=9606 GN=GAD1 PE=1 SV=1
25.7716	26.1626	25.3316	25.7038	27.1457	26.9372	25.5041	26.2032	26.1801	26.3315	26.6174	26.7709	26.0809	26.9805	27.2431	26.9402	26.8748	27.3605	25.9666	26.7783	25.9552	26.4217	26.3216	26.256				11	11	11	47	47	47	65.388	0	199.4	1853000000	146	sp|P48321|DCE2_PIG;sp|Q05329|DCE2_HUMAN	sp|P48321|DCE2_PIG;sp|Q05329|DCE2_HUMAN	sp|P48321|DCE2_PIG Glutamate decarboxylase 2 OS=Sus scrofa OX=9823 GN=GAD2 PE=2 SV=1;sp|Q05329|DCE2_HUMAN Glutamate decarboxylase 2 OS=Homo sapiens OX=9606 GN=GAD2 PE=1 SV=1
26.3689	25.7907	25.8966	26.226	27.1738	25.2032	26.2646	25.5322	25.6055	26.9059	25.9543	25.8959	25.564	26.505	26.3302	25.8623	25.6242	26.3139	25.7155	26.3293	24.8539	26.3297	25.8138	26.0765				8	8	8	23.3	23.3	23.3	57.21	0	118.83	1773300000	138	sp|P48444|COPD_HUMAN;sp|P48444-2|COPD_HUMAN	sp|P48444|COPD_HUMAN;sp|P48444-2|COPD_HUMAN	sp|P48444|COPD_HUMAN Coatomer subunit delta OS=Homo sapiens OX=9606 GN=ARCN1 PE=1 SV=1;sp|P48444-2|COPD_HUMAN Isoform 2 of Coatomer subunit delta OS=Homo sapiens OX=9606 GN=ARCN1
24.1835	24.8575	25.0269	25.4985	24.7229	25.2878	24.5911	24.4734	25.3041	24.7228	24.4198	24.9211	24.4882	24.8261	24.1222	NaN	24.2368	23.8631	25.7022	24.2892	24.9838	23.745	24.8876	24.1835				8	8	8	17.4	17.4	17.4	72.765	0	68.302	686310000	59	sp|P48506|GSH1_HUMAN	sp|P48506|GSH1_HUMAN	sp|P48506|GSH1_HUMAN Glutamate--cysteine ligase catalytic subunit OS=Homo sapiens OX=9606 GN=GCLC PE=1 SV=2
25.5362	26.0591	26.2262	25.4403	27.1046	24.7353	25.7386	25.042	25.5418	24.7013	25.62	25.7533	25.7642	25.8752	26.615	25.3227	27.2835	26.0083	25.9491	26.1748	25.709	23.6788	25.1093	25.923				2	2	2	27.4	27.4	27.4	6.7913	0	323.31	1349500000	68	sp|P48539|PCP4_HUMAN	sp|P48539|PCP4_HUMAN	sp|P48539|PCP4_HUMAN Calmodulin regulator protein PCP4 OS=Homo sapiens OX=9606 GN=PCP4 PE=1 SV=3
26.5698	25.2936	26.5342	24.7665	25.2897	25.0402	25.893	25.9899	26.2282	25.6112	26.109	25.5665	25.821	26.4312	26.4138	26.3363	26.1186	25.9794	26.3631	26.3077	26.2134	25.4838	26.116	25.9057				5	5	5	23.1	23.1	23.1	39.611	0	25.44	1321500000	74	sp|P48556|PSMD8_HUMAN	sp|P48556|PSMD8_HUMAN	sp|P48556|PSMD8_HUMAN 26S proteasome non-ATPase regulatory subunit 8 OS=Homo sapiens OX=9606 GN=PSMD8 PE=1 SV=2
29.3793	29.2749	29.2905	28.7773	28.8542	29.4127	29.4467	29.253	29.5735	28.8379	29.3171	29.5863	29.1702	29.5524	29.5629	28.2379	29.3241	30.5472	29.4792	29.2881	28.6595	29.2915	29.9774	29.3128				14	14	14	44.2	44.2	44.2	59.67	0	323.31	18647000000	431	sp|P48643|TCPE_HUMAN;sp|P48643-2|TCPE_HUMAN	sp|P48643|TCPE_HUMAN;sp|P48643-2|TCPE_HUMAN	sp|P48643|TCPE_HUMAN T-complex protein 1 subunit epsilon OS=Homo sapiens OX=9606 GN=CCT5 PE=1 SV=1;sp|P48643-2|TCPE_HUMAN Isoform 2 of T-complex protein 1 subunit epsilon OS=Homo sapiens OX=9606 GN=CCT5
26.0576	25.8479	26.1029	26.7961	22.4683	25.0801	24.754	26.769	24.9842	25.4458	26.0657	26.4909	24.4337	26.284	25.3731	NaN	24.7282	25.7621	22.7715	25.7674	24.7403	24.8239	25.662	24.1954				3	3	3	25.1	25.1	25.1	31.54	0	7.8388	1302400000	29	sp|P48739|PIPNB_HUMAN;sp|P48739-2|PIPNB_HUMAN;sp|P48739-3|PIPNB_HUMAN	sp|P48739|PIPNB_HUMAN;sp|P48739-2|PIPNB_HUMAN;sp|P48739-3|PIPNB_HUMAN	sp|P48739|PIPNB_HUMAN Phosphatidylinositol transfer protein beta isoform OS=Homo sapiens OX=9606 GN=PITPNB PE=1 SV=2;sp|P48739-2|PIPNB_HUMAN Isoform 2 of Phosphatidylinositol transfer protein beta isoform OS=Homo sapiens OX=9606 GN=PITPNB;sp|P48739-3|PIPNB
27.9711	27.3309	28.1282	26.9829	26.4024	26.8933	28.1712	27.5177	27.7831	26.3851	26.943	27.1124	27.5204	26.9637	27.6939	27.8285	29.0038	28.6171	27.7273	27.9911	27.9993	25.9897	28.3825	28.7655				3	3	3	9.2	9.2	9.2	46.454	0	50.374	4975300000	75	sp|P49189-2|AL9A1_HUMAN;sp|P49189|AL9A1_HUMAN	sp|P49189-2|AL9A1_HUMAN;sp|P49189|AL9A1_HUMAN	sp|P49189-2|AL9A1_HUMAN Isoform 2 of 4-trimethylaminobutyraldehyde dehydrogenase OS=Homo sapiens OX=9606 GN=ALDH9A1;sp|P49189|AL9A1_HUMAN 4-trimethylaminobutyraldehyde dehydrogenase OS=Homo sapiens OX=9606 GN=ALDH9A1 PE=1 SV=3
21.4158	24.0306	24.0187	22.6317	22.7644	22.8201	23.326	24.1923	23.1436	23.1118	24.2304	24.3539	24.1977	23.0325	23.4035	24.1474	18.7507	24.1162	24.6069	NaN	NaN	24.0304	24.0205	23.6054				3	3	3	14.3	14.3	14.3	48.804	0	26.036	277870000	36	sp|P49321-2|NASP_HUMAN;sp|P49321|NASP_HUMAN;sp|P49321-3|NASP_HUMAN;sp|P49321-4|NASP_HUMAN	sp|P49321-2|NASP_HUMAN;sp|P49321|NASP_HUMAN;sp|P49321-3|NASP_HUMAN	sp|P49321-2|NASP_HUMAN Isoform 2 of Nuclear autoantigenic sperm protein OS=Homo sapiens OX=9606 GN=NASP;sp|P49321|NASP_HUMAN Nuclear autoantigenic sperm protein OS=Homo sapiens OX=9606 GN=NASP PE=1 SV=2;sp|P49321-3|NASP_HUMAN Isoform 3 of Nuclear autoantig
26.7832	26.4054	26.7196	26.9463	26.2129	25.6724	26.5995	26.437	26.3657	25.3184	26.7892	26.3052	26.5902	25.9653	26.8784	27.8289	26.5009	26.8975	26.4122	25.6104	27.8284	26.8936	26.4127	27.1634				5	5	5	2.7	2.7	2.7	273.42	0	160.11	2914700000	134	sp|P49327|FAS_HUMAN	sp|P49327|FAS_HUMAN	sp|P49327|FAS_HUMAN Fatty acid synthase OS=Homo sapiens OX=9606 GN=FASN PE=1 SV=3
24.7747	23.9598	25.4756	24.3085	24.3733	24.3375	25.1627	24.8996	24.5463	25.2206	24.8166	24.2784	24.1193	24.4185	25.0324	23.6546	25.8275	NaN	23.7094	23.1048	24.4102	24.6431	24.3871	24.4458				3	3	3	13.5	13.5	13.5	36.492	0	50.666	554190000	78	sp|P49354-2|FNTA_HUMAN;sp|P49354|FNTA_HUMAN	sp|P49354-2|FNTA_HUMAN;sp|P49354|FNTA_HUMAN	sp|P49354-2|FNTA_HUMAN Isoform 2 of Protein farnesyltransferase/geranylgeranyltransferase type-1 subunit alpha OS=Homo sapiens OX=9606 GN=FNTA;sp|P49354|FNTA_HUMAN Protein farnesyltransferase/geranylgeranyltransferase type-1 subunit alpha OS=Homo sapiens O
24.6423	24.7138	24.421	24.3384	NaN	25.0225	24.2195	24.8022	24.8269	24.4897	24.5933	24.5965	24.1132	24.7673	24.6327	NaN	25.6982	24.7083	24.7959	24.7459	23.9822	24.7893	24.9203	24.5561				4	4	4	17.6	17.6	17.6	40.97	0	31.21	556220000	44	sp|P49366|DHYS_HUMAN;sp|P49366-2|DHYS_HUMAN;sp|P49366-3|DHYS_HUMAN	sp|P49366|DHYS_HUMAN;sp|P49366-2|DHYS_HUMAN;sp|P49366-3|DHYS_HUMAN	sp|P49366|DHYS_HUMAN Deoxyhypusine synthase OS=Homo sapiens OX=9606 GN=DHPS PE=1 SV=1;sp|P49366-2|DHYS_HUMAN Isoform Short of Deoxyhypusine synthase OS=Homo sapiens OX=9606 GN=DHPS;sp|P49366-3|DHYS_HUMAN Isoform 3 of Deoxyhypusine synthase OS=Homo sapiens
29.9816	30.1473	29.4635	30.2288	29.6138	29.5651	30.0806	30.0235	30.0942	30.0581	29.6721	29.7959	29.9762	30.1775	29.5162	30.015	29.5865	30.1427	29.8707	29.9134	29.3879	29.8279	30.07	30.0761				12	12	12	32.3	32.3	32.3	60.533	0	115.75	27641000000	442	sp|P49368|TCPG_HUMAN;sp|P49368-2|TCPG_HUMAN;sp|Q29068|TCPG_PIG	sp|P49368|TCPG_HUMAN;sp|P49368-2|TCPG_HUMAN	sp|P49368|TCPG_HUMAN T-complex protein 1 subunit gamma OS=Homo sapiens OX=9606 GN=CCT3 PE=1 SV=4;sp|P49368-2|TCPG_HUMAN Isoform 2 of T-complex protein 1 subunit gamma OS=Homo sapiens OX=9606 GN=CCT3
23.937	25.0595	24.9945	24.5068	25.6791	25.5978	25.3688	25.1283	23.3649	NaN	25.5433	23.7196	23.6922	24.8673	24.5472	NaN	24.5326	24.3322	23.5436	23.534	24.2905	24.5019	24.7935	24.473				6	6	6	28.5	28.5	28.5	46.308	0	60.67	625670000	76	sp|P49407-2|ARRB1_HUMAN;sp|P49407|ARRB1_HUMAN	sp|P49407-2|ARRB1_HUMAN;sp|P49407|ARRB1_HUMAN	sp|P49407-2|ARRB1_HUMAN Isoform 1B of Beta-arrestin-1 OS=Homo sapiens OX=9606 GN=ARRB1;sp|P49407|ARRB1_HUMAN Beta-arrestin-1 OS=Homo sapiens OX=9606 GN=ARRB1 PE=1 SV=2
27.216	27.3786	25.6366	27.0454	26.668	26.2172	26.3539	26.8826	27.3122	26.9611	26.1317	26.1771	27.1229	26.8069	27.0493	27.1849	27.2258	26.732	26.9199	26.2626	25.4834	27.3513	27.139	26.6577				6	6	6	19	19	19	49.541	0	139.46	3442400000	203	sp|P49411|EFTU_HUMAN	sp|P49411|EFTU_HUMAN	sp|P49411|EFTU_HUMAN Elongation factor Tu, mitochondrial OS=Homo sapiens OX=9606 GN=TUFM PE=1 SV=2
28.792	29.1198	28.6936	28.2805	28.5886	28.8214	28.4945	29.1859	29.0485	28.9874	28.6066	29.2853	29.1193	29.3405	29.1867	29.9604	29.2654	29.1936	29.0749	29.255	28.5742	28.7261	28.7867	29.0906				10	10	10	24.3	24.3	24.3	71.928	0	317.69	11403000000	323	sp|P49418-2|AMPH_HUMAN;sp|P49418|AMPH_HUMAN	sp|P49418-2|AMPH_HUMAN;sp|P49418|AMPH_HUMAN	sp|P49418-2|AMPH_HUMAN Isoform 2 of Amphiphysin OS=Homo sapiens OX=9606 GN=AMPH;sp|P49418|AMPH_HUMAN Amphiphysin OS=Homo sapiens OX=9606 GN=AMPH PE=1 SV=1
28.9996	28.3099	29.2452	28.4895	28.602	28.7345	28.854	28.1178	28.4158	28.7052	28.669	28.7558	28.495	28.1357	28.6507	29.038	28.5988	27.5176	28.2393	27.9283	29.0143	28.5058	28.3148	28.6696				13	13	13	40.3	40.3	40.3	55.366	0	323.31	8662900000	329	sp|P49419-2|AL7A1_HUMAN;sp|P49419|AL7A1_HUMAN;sp|P49419-4|AL7A1_HUMAN	sp|P49419-2|AL7A1_HUMAN;sp|P49419|AL7A1_HUMAN;sp|P49419-4|AL7A1_HUMAN	sp|P49419-2|AL7A1_HUMAN Isoform 2 of Alpha-aminoadipic semialdehyde dehydrogenase OS=Homo sapiens OX=9606 GN=ALDH7A1;sp|P49419|AL7A1_HUMAN Alpha-aminoadipic semialdehyde dehydrogenase OS=Homo sapiens OX=9606 GN=ALDH7A1 PE=1 SV=5;sp|P49419-4|AL7A1_HUMAN Iso
28.8407	28.7171	29.1283	29.0871	28.7285	28.4955	28.641	28.6962	28.5955	28.5525	28.6871	28.7879	28.3169	28.5341	29.2252	29.35	29.0268	29.2078	28.4402	29.1658	28.9565	28.7112	28.8163	28.945				15	15	15	27.3	27.3	27.3	106.81	0	323.31	9862100000	433	sp|P49588|SYAC_HUMAN;sp|P49588-2|SYAC_HUMAN	sp|P49588|SYAC_HUMAN;sp|P49588-2|SYAC_HUMAN	sp|P49588|SYAC_HUMAN Alanine--tRNA ligase, cytoplasmic OS=Homo sapiens OX=9606 GN=AARS PE=1 SV=2;sp|P49588-2|SYAC_HUMAN Isoform 2 of Alanine--tRNA ligase, cytoplasmic OS=Homo sapiens OX=9606 GN=AARS
27.2668	27.4345	27.5573	27.651	27.2136	27.3866	27.7617	27.5159	27.5894	27.5101	26.7321	27.2625	27.0712	27.2619	27.4221	27.3467	27.3229	26.729	27.1496	27.0162	27.3043	27.0258	27.2425	27.4452				10	10	10	23	23	23	58.777	0	243.79	4050600000	174	sp|P49591|SYSC_HUMAN	sp|P49591|SYSC_HUMAN	sp|P49591|SYSC_HUMAN Serine--tRNA ligase, cytoplasmic OS=Homo sapiens OX=9606 GN=SARS PE=1 SV=3
23.8384	23.7682	24.7575	24.3625	24.1259	24.3826	23.22	24.8416	23.7348	24.5696	23.4221	23.9883	23.6148	24.0418	24.8073	24.2954	NaN	24.4148	24.2767	23.8977	23.4472	24.0055	23.7519	23.7917				3	3	3	9.4	9.4	9.4	82.785	0	19.751	377440000	38	sp|P49711|CTCF_HUMAN	sp|P49711|CTCF_HUMAN	sp|P49711|CTCF_HUMAN Transcriptional repressor CTCF OS=Homo sapiens OX=9606 GN=CTCF PE=1 SV=1
27.5955	27.2916	26.831	26.7869	27.1132	26.9108	27.4176	27.1435	27.0413	27.2133	27.4368	28.0899	26.5291	26.4336	27.1871	27.0284	27.0645	26.1101	27.234	26.2055	27.7874	26.9344	26.585	26.8126				4	4	4	26.8	26.8	26.8	22.949	0	100.65	3447100000	94	sp|P49720|PSB3_HUMAN	sp|P49720|PSB3_HUMAN	sp|P49720|PSB3_HUMAN Proteasome subunit beta type-3 OS=Homo sapiens OX=9606 GN=PSMB3 PE=1 SV=2
26.9114	26.9303	27.4227	26.5108	26.9741	27.1798	26.6261	26.7305	26.4566	26.9013	26.6573	26.6584	26.8599	26.389	27.0134	26.0809	27.5745	27.0547	26.3723	27.442	27.7457	26.9952	26.3505	26.5818				6	6	6	54.7	54.7	54.7	22.836	0	55.92	2539600000	179	sp|P49721|PSB2_HUMAN	sp|P49721|PSB2_HUMAN	sp|P49721|PSB2_HUMAN Proteasome subunit beta type-2 OS=Homo sapiens OX=9606 GN=PSMB2 PE=1 SV=1
25.1142	25.3743	26.6486	26.6115	25.3944	25.7804	26.0366	25.0063	26.3674	26.4581	26.6479	25.178	25.6878	25.2197	24.7437	25.1191	25.853	26.5057	25.6565	24.2858	25.4188	26.1486	26.2165	25.6832				3	3	3	12.8	12.8	12.8	24.976	0	311.61	1694100000	100	sp|P49755|TMEDA_HUMAN	sp|P49755|TMEDA_HUMAN	sp|P49755|TMEDA_HUMAN Transmembrane emp24 domain-containing protein 10 OS=Homo sapiens OX=9606 GN=TMED10 PE=1 SV=2
25.3897	25.2563	25.281	25.6734	26.5009	26.2203	25.0559	25.3095	24.8669	25.8928	26.2972	26.1415	25.1039	24.8721	24.8959	24.2541	24.6141	25.3566	25.044	26.5972	25.0608	25.6747	25.2153	25.4956				4	4	4	10.2	10.2	10.2	100.18	0	43.809	1071500000	84	sp|P49756|RBM25_HUMAN;sp|P49756-2|RBM25_HUMAN;sp|P49756-3|RBM25_HUMAN	sp|P49756|RBM25_HUMAN	sp|P49756|RBM25_HUMAN RNA-binding protein 25 OS=Homo sapiens OX=9606 GN=RBM25 PE=1 SV=3
25.1347	25.7435	25.0908	24.6012	26.0239	25.9507	25.1425	26.0395	26.5163	25.7607	26.6468	25.367	25.1978	24.9936	25.2393	25.5664	25.0988	25.6811	25.7012	27.1778	23.9722	25.4951	25.4863	25.5109				6	6	5	25.2	25.2	22.4	49.519	0	78.777	1018400000	75	sp|P49758-6|RGS6_HUMAN;sp|P49758-11|RGS6_HUMAN;sp|P49758-7|RGS6_HUMAN;sp|P49758-10|RGS6_HUMAN;sp|P49758-9|RGS6_HUMAN;sp|P49758-16|RGS6_HUMAN;sp|P49758-5|RGS6_HUMAN;sp|P49758-8|RGS6_HUMAN;sp|P49758|RGS6_HUMAN;sp|P49758-13|RGS6_HUMAN;sp|P49758-14|RGS6_HUMAN;sp|P49758-15|RGS6_HUMAN;sp|P49758-2|RGS6_HUMAN;sp|P49758-3|RGS6_HUMAN;sp|P49758-12|RGS6_HUMAN	sp|P49758-6|RGS6_HUMAN;sp|P49758-11|RGS6_HUMAN;sp|P49758-7|RGS6_HUMAN;sp|P49758-10|RGS6_HUMAN;sp|P49758-9|RGS6_HUMAN;sp|P49758-16|RGS6_HUMAN;sp|P49758-5|RGS6_HUMAN;sp|P49758-8|RGS6_HUMAN;sp|P49758|RGS6_HUMAN;sp|P49758-13|RGS6_HUMAN;sp|P49758-14|RGS6_HUMAN;sp|P49758-15|RGS6_HUMAN;sp|P49758-2|RGS6_HUMAN;sp|P49758-3|RGS6_HUMAN;sp|P49758-12|RGS6_HUMAN	sp|P49758-6|RGS6_HUMAN Isoform 6 of Regulator of G-protein signaling 6 OS=Homo sapiens OX=9606 GN=RGS6;sp|P49758-11|RGS6_HUMAN Isoform 11 of Regulator of G-protein signaling 6 OS=Homo sapiens OX=9606 GN=RGS6;sp|P49758-7|RGS6_HUMAN Isoform 7 of Regulator of
24.2473	24.0343	24.7312	23.1309	20.9917	23.8925	23.812	24.1133	NaN	23.5272	23.0711	24.31	23.0002	23.9067	23.2302	NaN	23.0862	21.3938	NaN	22.1431	23.0065	24.3139	23.7492	23.9405				2	2	2	14.5	14.5	14.5	38.989	0.00034542	4.3677	237050000	17	sp|P49770|EI2BB_HUMAN	sp|P49770|EI2BB_HUMAN	sp|P49770|EI2BB_HUMAN Translation initiation factor eIF-2B subunit beta OS=Homo sapiens OX=9606 GN=EIF2B2 PE=1 SV=3
23.5957	24.1777	23.7563	23.3966	23.9654	24.6263	23.4089	23.2673	23.2081	23.5954	24.1561	24.181	23.1365	26.1207	NaN	25.1599	23.8441	23.8372	23.7242	NaN	23.177	23.9197	23.8864	24.0728				5	4	4	18.8	16.2	16.2	54.684	0	45.616	356340000	38	sp|P49802-2|RGS7_HUMAN;sp|P49802-3|RGS7_HUMAN;sp|P49802-5|RGS7_HUMAN;sp|P49802|RGS7_HUMAN;sp|P49802-4|RGS7_HUMAN	sp|P49802-2|RGS7_HUMAN;sp|P49802-3|RGS7_HUMAN;sp|P49802-5|RGS7_HUMAN;sp|P49802|RGS7_HUMAN;sp|P49802-4|RGS7_HUMAN	sp|P49802-2|RGS7_HUMAN Isoform 2 of Regulator of G-protein signaling 7 OS=Homo sapiens OX=9606 GN=RGS7;sp|P49802-3|RGS7_HUMAN Isoform 3 of Regulator of G-protein signaling 7 OS=Homo sapiens OX=9606 GN=RGS7;sp|P49802-5|RGS7_HUMAN Isoform 5 of Regulator of G
27.6452	27.9157	27.6846	27.7122	28.0133	28.2873	27.0349	28.0453	28.4632	28.5507	27.7127	28.3073	28.4602	28.3969	28.044	28.3707	28.3844	28.8435	28.5582	28.8528	27.8989	27.999	27.9617	28.1505				8	8	8	38.2	38.2	38.2	49.867	0	323.31	6986000000	254	sp|P49821-2|NDUV1_HUMAN;sp|P49821|NDUV1_HUMAN	sp|P49821-2|NDUV1_HUMAN;sp|P49821|NDUV1_HUMAN	sp|P49821-2|NDUV1_HUMAN Isoform 2 of NADH dehydrogenase [ubiquinone] flavoprotein 1, mitochondrial OS=Homo sapiens OX=9606 GN=NDUFV1;sp|P49821|NDUV1_HUMAN NADH dehydrogenase [ubiquinone] flavoprotein 1, mitochondrial OS=Homo sapiens OX=9606 GN=NDUFV1 PE=1
26.9313	27.1311	27.5657	27.7145	26.5507	27.2493	26.8051	26.8466	26.9783	26.4367	26.8383	27.6884	26.1463	26.7581	27.1146	27.0001	26.9423	26.8039	26.3296	26.771	27.344	26.6794	26.7752	26.6724				9	9	9	27.1	27.1	27.1	61.44	0	108.47	2960600000	172	sp|P49902-2|5NTC_HUMAN;sp|P49902|5NTC_HUMAN	sp|P49902-2|5NTC_HUMAN;sp|P49902|5NTC_HUMAN	sp|P49902-2|5NTC_HUMAN Isoform 2 of Cytosolic purine 5-nucleotidase OS=Homo sapiens OX=9606 GN=NT5C2;sp|P49902|5NTC_HUMAN Cytosolic purine 5-nucleotidase OS=Homo sapiens OX=9606 GN=NT5C2 PE=1 SV=1
25.95	24.8758	26.2527	26.3273	25.7508	25.8407	26.1227	25.4532	26.859	26.4681	27.0538	26.9063	25.8742	25.178	26.0779	25.7376	26.9982	25.4188	25.791	25.5096	25.1523	25.1347	26.132	26.3293				8	8	8	37	37	37	42.91	0	58.069	1579200000	117	sp|P49903|SPS1_HUMAN;sp|P49903-2|SPS1_HUMAN;sp|P49903-4|SPS1_HUMAN;sp|P49903-3|SPS1_HUMAN	sp|P49903|SPS1_HUMAN;sp|P49903-2|SPS1_HUMAN;sp|P49903-4|SPS1_HUMAN;sp|P49903-3|SPS1_HUMAN	sp|P49903|SPS1_HUMAN Selenide, water dikinase 1 OS=Homo sapiens OX=9606 GN=SEPHS1 PE=1 SV=2;sp|P49903-2|SPS1_HUMAN Isoform 2 of Selenide, water dikinase 1 OS=Homo sapiens OX=9606 GN=SEPHS1;sp|P49903-4|SPS1_HUMAN Isoform 4 of Selenide, water dikinase 1 OS=H
25.8579	26.3571	25.6385	25.3451	25.9659	26.5655	26.1311	25.9495	26.0141	26.1203	26.166	26.1496	26.2233	26.4162	26.0669	25.0795	26.069	26.2	26.0363	26.492	25.8496	26.0474	26.091	26.168				10	10	10	27.8	27.8	27.8	76.715	0	126.5	1668000000	172	sp|P49915|GUAA_HUMAN;sp|P49915-2|GUAA_HUMAN	sp|P49915|GUAA_HUMAN;sp|P49915-2|GUAA_HUMAN	sp|P49915|GUAA_HUMAN GMP synthase [glutamine-hydrolyzing] OS=Homo sapiens OX=9606 GN=GMPS PE=1 SV=1;sp|P49915-2|GUAA_HUMAN Isoform 2 of GMP synthase [glutamine-hydrolyzing] OS=Homo sapiens OX=9606 GN=GMPS
27.816	27.8606	28.1797	27.7029	27.6972	27.5853	27.6465	28.0801	28.3009	28.3262	28.0096	27.7727	27.5345	27.5835	27.4241	28.1612	27.7391	28.1847	27.7325	27.9234	28.2774	28.0841	27.9829	27.7904				10	10	6	41.2	41.2	26.2	42.142	0	42.352	5679900000	213	sp|Q2PKF4|GNAQ_PIG;sp|P50148|GNAQ_HUMAN	sp|Q2PKF4|GNAQ_PIG;sp|P50148|GNAQ_HUMAN	sp|Q2PKF4|GNAQ_PIG Guanine nucleotide-binding protein G(q) subunit alpha OS=Sus scrofa OX=9823 GN=GNAQ PE=2 SV=3;sp|P50148|GNAQ_HUMAN Guanine nucleotide-binding protein G(q) subunit alpha OS=Homo sapiens OX=9606 GN=GNAQ PE=1 SV=4
27.0037	26.5876	27.071	27.7024	27.97	26.6776	26.5066	26.4136	26.2496	27.7347	26.6819	27.4447	25.7139	26.1326	26.4808	26.4969	27.4746	26.8215	26.4873	27.4058	26.574	27.1989	26.492	27.141				3	3	3	68	68	68	8.3887	0	5.6981	2903500000	50	sp|P50150|GBG4_HUMAN	sp|P50150|GBG4_HUMAN	sp|P50150|GBG4_HUMAN Guanine nucleotide-binding protein G(I)/G(S)/G(O) subunit gamma-4 OS=Homo sapiens OX=9606 GN=GNG4 PE=1 SV=1
28.8721	29.6691	28.4115	29.7654	29.5057	29.2661	29.0682	29.8572	30.2301	29.7763	28.987	29.276	29.749	29.8229	29.2778	30.1209	29.4145	29.5162	29.3228	30.0741	28.7891	29.5719	29.5987	29.7055				6	6	6	33	33	33	31.381	0	323.31	20441000000	281	sp|P50213-2|IDH3A_HUMAN;sp|P50213|IDH3A_HUMAN	sp|P50213-2|IDH3A_HUMAN;sp|P50213|IDH3A_HUMAN	sp|P50213-2|IDH3A_HUMAN Isoform 2 of Isocitrate dehydrogenase [NAD] subunit alpha, mitochondrial OS=Homo sapiens OX=9606 GN=IDH3A;sp|P50213|IDH3A_HUMAN Isocitrate dehydrogenase [NAD] subunit alpha, mitochondrial OS=Homo sapiens OX=9606 GN=IDH3A PE=1 SV=1
28.0534	28.2616	28.9705	28.2149	27.985	28.2143	28.7212	27.7483	23.2939	27.2702	27.5283	27.7718	27.2916	27.0199	27.5841	27.5287	28.586	27.2611	28.5953	27.8412	28.5571	27.781	27.3918	27.7869				4	4	4	48.7	48.7	48.7	16.081	0	76.87	6574000000	134	sp|P50390|TTHY_PIG	sp|P50390|TTHY_PIG	sp|P50390|TTHY_PIG Transthyretin OS=Sus scrofa OX=9823 GN=TTR PE=1 SV=1
27.6666	28.3375	NaN	29.1445	23.2218	24.5968	27.5966	NaN	27.2272	28.0921	24.788	26.6615	28.7047	29.3026	26.9686	NaN	26.1035	25.1762	25.8984	25.8465	25.7011	25.7525	26.8186	27.48				17	3	3	53	7.9	7.9	50.663	0	36.388	4663700000	32	sp|P50395|GDIB_HUMAN;sp|P50395-2|GDIB_HUMAN	sp|P50395|GDIB_HUMAN;sp|P50395-2|GDIB_HUMAN	sp|P50395|GDIB_HUMAN Rab GDP dissociation inhibitor beta OS=Homo sapiens OX=9606 GN=GDI2 PE=1 SV=2;sp|P50395-2|GDIB_HUMAN Isoform 2 of Rab GDP dissociation inhibitor beta OS=Homo sapiens OX=9606 GN=GDI2
26.4472	25.5634	27.5479	28.13	26.2246	25.6893	27.5839	26.1813	26.3541	25.7624	27.6333	27.0436	26.1937	25.4901	26.9272	25.5785	26.5871	27.0352	25.9006	25.7733	29.3958	26.316	25.7769	27.72				9	9	9	41.6	41.6	41.6	47.194	0	164.81	2942600000	104	sp|P50447|A1AT_PIG;CON__P34955	sp|P50447|A1AT_PIG	sp|P50447|A1AT_PIG Alpha-1-antitrypsin OS=Sus scrofa OX=9823 GN=SERPINA1 PE=2 SV=1
30.1544	29.9828	30.4997	29.9208	29.3514	29.6077	30.6994	29.6335	29.6745	29.8071	29.5601	28.9683	29.9719	29.4637	30.0342	29.9756	28.9451	29.1785	30.0087	29.263	30.488	29.7197	29.8669	29.815				11	11	11	35.6	35.6	35.6	46.44	0	323.31	26443000000	351	sp|P50454|SERPH_HUMAN	sp|P50454|SERPH_HUMAN	sp|P50454|SERPH_HUMAN Serpin H1 OS=Homo sapiens OX=9606 GN=SERPINH1 PE=1 SV=2
28.8659	28.662	27.9607	29.1315	28.49	28.1693	29.212	29.8122	29.538	28.1722	28.0423	27.875	28.9946	28.7421	28.6735	29.1954	28.9857	28.8297	29.3888	29.4362	28.8086	28.8279	28.8892	27.2521				4	4	4	14.1	14.1	14.1	41.331	0	38.122	12647000000	91	sp|P50502|F10A1_HUMAN;sp|Q8IZP2|ST134_HUMAN;sp|Q8NFI4|F10A5_HUMAN	sp|P50502|F10A1_HUMAN;sp|Q8IZP2|ST134_HUMAN;sp|Q8NFI4|F10A5_HUMAN	sp|P50502|F10A1_HUMAN Hsc70-interacting protein OS=Homo sapiens OX=9606 GN=ST13 PE=1 SV=2;sp|Q8IZP2|ST134_HUMAN Putative protein FAM10A4 OS=Homo sapiens OX=9606 GN=ST13P4 PE=5 SV=1;sp|Q8NFI4|F10A5_HUMAN Putative protein FAM10A5 OS=Homo sapiens OX=9606 GN=S
28.8522	29.0344	28.7184	28.9552	28.3745	28.9131	29.1512	28.6605	28.9242	29.3583	29.0439	28.4147	28.7147	28.4924	29.2486	28.8116	28.7802	28.3956	28.327	28.4267	29.0205	28.649	28.8495	29.1251				8	8	3	32.6	32.6	10.2	36.539	0	112.41	11123000000	217	sp|P50578|AK1A1_PIG	sp|P50578|AK1A1_PIG	sp|P50578|AK1A1_PIG Alcohol dehydrogenase [NADP(+)] OS=Sus scrofa OX=9823 GN=AKR1A1 PE=1 SV=2
29.9717	30.1794	29.4103	29.1521	30.2133	30.1168	29.2387	29.3799	29.2805	29.747	29.5664	30.4392	29.7467	29.5343	29.7215	28.5385	29.6414	29.6435	28.9324	30.9534	29.8527	29.6421	29.4431	30.1877				4	4	4	36	36	36	26.184	0	269.01	34757000000	368	sp|P50667|COX2_PIG	sp|P50667|COX2_PIG	sp|P50667|COX2_PIG Cytochrome c oxidase subunit 2 OS=Sus scrofa OX=9823 GN=MT-CO2 PE=3 SV=1
26.762	24.9127	28.5409	26.5413	26.5114	26.5634	26.6904	26.0054	26.4823	26.7038	27.8789	26.7001	26.7777	25.8797	25.5829	24.4201	26.1819	25.7213	26.9059	26.6783	28.0694	25.2634	25.253	26.0855				7	7	7	29.8	29.8	29.8	51.305	0	126.77	2520900000	114	sp|P50828|HEMO_PIG	sp|P50828|HEMO_PIG	sp|P50828|HEMO_PIG Hemopexin OS=Sus scrofa OX=9823 GN=HPX PE=1 SV=1
26.8988	26.732	26.9373	27.2928	27.6484	27.6252	27.3302	26.3013	26.9524	27.222	27.6319	26.5939	26.4239	26.415	26.6193	26.8978	27.0103	26.579	27.5595	26.5989	26.3908	26.6963	26.5743	27.0363				4	4	4	15.4	15.4	15.4	34.193	0	78.845	2868100000	112	sp|P50897|PPT1_HUMAN;sp|P50897-2|PPT1_HUMAN	sp|P50897|PPT1_HUMAN	sp|P50897|PPT1_HUMAN Palmitoyl-protein thioesterase 1 OS=Homo sapiens OX=9606 GN=PPT1 PE=1 SV=1
29.896	29.9676	29.9991	29.8209	29.3809	29.5031	29.7673	29.8459	29.9487	29.7472	29.8153	30.6527	29.9828	29.8076	30.0888	30.3155	30.0363	30.1965	30.088	30.0907	29.7725	29.9901	30.1518	30.02				15	15	15	43.4	43.4	43.4	59.62	0	323.31	24581000000	580	sp|P50990|TCPQ_HUMAN;sp|P50990-2|TCPQ_HUMAN;sp|P50990-3|TCPQ_HUMAN	sp|P50990|TCPQ_HUMAN;sp|P50990-2|TCPQ_HUMAN;sp|P50990-3|TCPQ_HUMAN	sp|P50990|TCPQ_HUMAN T-complex protein 1 subunit theta OS=Homo sapiens OX=9606 GN=CCT8 PE=1 SV=4;sp|P50990-2|TCPQ_HUMAN Isoform 2 of T-complex protein 1 subunit theta OS=Homo sapiens OX=9606 GN=CCT8;sp|P50990-3|TCPQ_HUMAN Isoform 3 of T-complex protein 1 s
30.0331	30.0677	30.1966	30.0786	30.2089	30.4383	30.1107	30.1125	30.107	30.3322	30.2344	30.3892	30.0814	30.2387	30.1911	30.4579	30.4104	30.5672	30.3338	30.1695	29.8927	30.2586	30.2039	30.2607				13	13	13	36.9	36.9	36.9	57.924	0	323.31	29363000000	522	sp|P50991|TCPD_HUMAN;sp|P50991-2|TCPD_HUMAN	sp|P50991|TCPD_HUMAN;sp|P50991-2|TCPD_HUMAN	sp|P50991|TCPD_HUMAN T-complex protein 1 subunit delta OS=Homo sapiens OX=9606 GN=CCT4 PE=1 SV=4;sp|P50991-2|TCPD_HUMAN Isoform 2 of T-complex protein 1 subunit delta OS=Homo sapiens OX=9606 GN=CCT4
24.1638	23.0338	24.0597	24.8508	23.4054	23.2068	24.1839	23.2085	23.6225	23.4549	23.9435	23.9594	23.8342	22.7588	24.5259	23.3851	24.3446	23.3127	23.9332	NaN	23.5759	23.2764	23.6319	23.0349				3	3	3	8.7	8.7	8.7	51.242	0	5.8069	372860000	38	sp|P50995-2|ANX11_HUMAN;sp|P50995|ANX11_HUMAN	sp|P50995-2|ANX11_HUMAN;sp|P50995|ANX11_HUMAN	sp|P50995-2|ANX11_HUMAN Isoform 2 of Annexin A11 OS=Homo sapiens OX=9606 GN=ANXA11;sp|P50995|ANX11_HUMAN Annexin A11 OS=Homo sapiens OX=9606 GN=ANXA11 PE=1 SV=1
26.0887	25.4568	26.4627	24.7141	26.4009	26.1925	26.0279	26.1368	25.1189	24.1408	26.0687	25.7237	25.458	26.1313	24.8922	25.3667	25.7018	25.4649	25.5304	25.7326	25.6683	25.6245	25.7473	25.9777				5	5	5	17.7	17.7	17.7	59.919	0	223.59	1231700000	58	sp|P51114-3|FXR1_HUMAN;sp|P51114-2|FXR1_HUMAN;sp|P51114|FXR1_HUMAN	sp|P51114-3|FXR1_HUMAN;sp|P51114-2|FXR1_HUMAN;sp|P51114|FXR1_HUMAN	sp|P51114-3|FXR1_HUMAN Isoform 3 of Fragile X mental retardation syndrome-related protein 1 OS=Homo sapiens OX=9606 GN=FXR1;sp|P51114-2|FXR1_HUMAN Isoform 2 of Fragile X mental retardation syndrome-related protein 1 OS=Homo sapiens OX=9606 GN=FXR1;sp|P5111
25.1648	24.298	24.5018	24.0976	24.1301	24.2207	24.6846	24.8156	25.9008	24.1391	24.2804	25.5622	24.6382	23.6492	24.6041	25.6911	24.751	NaN	25.3362	24.6102	24.7475	24.7329	24.3781	23.2087				6	6	5	19.9	19.9	17.1	74.222	0	20.439	549720000	67	sp|P51116|FXR2_HUMAN	sp|P51116|FXR2_HUMAN	sp|P51116|FXR2_HUMAN Fragile X mental retardation syndrome-related protein 2 OS=Homo sapiens OX=9606 GN=FXR2 PE=1 SV=2
26.2274	26.296	27.1584	26.5082	25.7041	26.1539	25.7635	26.8417	25.9973	25.6173	26.0695	25.9585	26.2114	26.1674	26.5273	26.6656	23.3964	26.5687	25.273	26.2114	23.8771	26.2075	25.9598	26.1361				6	4	4	44.9	34.7	34.7	23.482	0	131.64	1871600000	126	sp|P51148|RAB5C_HUMAN;sp|P51148-2|RAB5C_HUMAN	sp|P51148|RAB5C_HUMAN;sp|P51148-2|RAB5C_HUMAN	sp|P51148|RAB5C_HUMAN Ras-related protein Rab-5C OS=Homo sapiens OX=9606 GN=RAB5C PE=1 SV=2;sp|P51148-2|RAB5C_HUMAN Isoform 2 of Ras-related protein Rab-5C OS=Homo sapiens OX=9606 GN=RAB5C
28.6726	29.1322	28.6006	29.2692	28.1713	28.2158	29.196	29.3049	29.0842	28.7452	28.7894	28.9427	28.8566	28.9145	28.7297	29.5884	27.9317	28.7332	28.5819	28.6898	29.0901	28.819	28.9293	29.2044				11	11	11	60.9	60.9	60.9	23.489	0	323.31	13400000000	319	sp|P51149|RAB7A_HUMAN	sp|P51149|RAB7A_HUMAN	sp|P51149|RAB7A_HUMAN Ras-related protein Rab-7a OS=Homo sapiens OX=9606 GN=RAB7A PE=1 SV=1
24.8639	26.1667	24.6618	26.1393	26.2975	25.7285	25.3029	26.0652	25.3078	24.7322	26.3243	25.7928	24.4276	26.7623	25.3837	25.537	25.5363	25.3025	25.4307	25.8323	24.3014	25.9714	25.9796	26.8331				9	8	8	13.8	12	12	99.146	0	323.31	1330900000	78	sp|P51160|PDE6C_HUMAN	sp|P51160|PDE6C_HUMAN	sp|P51160|PDE6C_HUMAN Cone cGMP-specific 3,5-cyclic phosphodiesterase subunit alpha OS=Homo sapiens OX=9606 GN=PDE6C PE=1 SV=2
24.9374	23.87	24.1664	24.2353	23.7029	21.9382	25.4419	23.4233	21.6931	25.1261	25.1043	23.9407	24.3949	22.8009	25.4531	24.8496	24.6186	NaN	23.8939	24.2628	24.7443	23.5512	24.3734	23.3128				4	4	4	6.5	6.5	6.5	85.664	0	222.87	476010000	52	sp|P51178|PLCD1_HUMAN;sp|P51178-2|PLCD1_HUMAN	sp|P51178|PLCD1_HUMAN;sp|P51178-2|PLCD1_HUMAN	sp|P51178|PLCD1_HUMAN 1-phosphatidylinositol 4,5-bisphosphate phosphodiesterase delta-1 OS=Homo sapiens OX=9606 GN=PLCD1 PE=1 SV=2;sp|P51178-2|PLCD1_HUMAN Isoform 2 of 1-phosphatidylinositol 4,5-bisphosphate phosphodiesterase delta-1 OS=Homo sapiens OX=960
26.1291	26.3157	25.3881	25.4897	25.2875	26.2858	25.6045	25.6946	26.3065	25.384	25.6545	24.9048	25.3764	25.3758	25.9988	25.1221	26.5408	26.2507	26.648	NaN	22.1287	26.1621	25.9103	25.1089				4	4	4	29.2	29.2	29.2	20.478	0	85.074	1301900000	71	sp|P51452|DUS3_HUMAN;sp|P51452-2|DUS3_HUMAN	sp|P51452|DUS3_HUMAN;sp|P51452-2|DUS3_HUMAN	sp|P51452|DUS3_HUMAN Dual specificity protein phosphatase 3 OS=Homo sapiens OX=9606 GN=DUSP3 PE=1 SV=1;sp|P51452-2|DUS3_HUMAN Isoform 2 of Dual specificity protein phosphatase 3 OS=Homo sapiens OX=9606 GN=DUSP3
24.2115	24.6335	23.2042	23.1181	22.1255	24.1465	23.8844	24.3186	23.212	23.5513	23.918	24.8943	24.1574	23.8712	24.3989	NaN	23.7526	23.6246	23.8513	23.6131	23.2009	24.0897	24.4302	24.3953				5	3	3	16.8	11.4	11.4	49.252	0	6.8864	299440000	26	sp|P51513-5|NOVA1_HUMAN;sp|P51513-3|NOVA1_HUMAN;sp|P51513-4|NOVA1_HUMAN;sp|P51513|NOVA1_HUMAN;sp|P51513-2|NOVA1_HUMAN	sp|P51513-5|NOVA1_HUMAN;sp|P51513-3|NOVA1_HUMAN;sp|P51513-4|NOVA1_HUMAN;sp|P51513|NOVA1_HUMAN	sp|P51513-5|NOVA1_HUMAN Isoform 5 of RNA-binding protein Nova-1 OS=Homo sapiens OX=9606 GN=NOVA1;sp|P51513-3|NOVA1_HUMAN Isoform 3 of RNA-binding protein Nova-1 OS=Homo sapiens OX=9606 GN=NOVA1;sp|P51513-4|NOVA1_HUMAN Isoform 4 of RNA-binding protein Nova-
24.7442	23.9453	23.6633	24.0814	24.7726	23.7062	24.2791	24.459	25.6524	23.1316	24.7907	24.5792	23.4464	24.6868	24.7225	23.7998	24.8593	25.0848	NaN	25.3848	24.5602	24.0193	24.6429	23.6629				9	5	5	9.7	6.2	6.2	179.28	0	10.841	513050000	37	sp|P51531-2|SMCA2_HUMAN;sp|P51531|SMCA2_HUMAN	sp|P51531-2|SMCA2_HUMAN;sp|P51531|SMCA2_HUMAN	sp|P51531-2|SMCA2_HUMAN Isoform Short of Probable global transcription activator SNF2L2 OS=Homo sapiens OX=9606 GN=SMARCA2;sp|P51531|SMCA2_HUMAN Probable global transcription activator SNF2L2 OS=Homo sapiens OX=9606 GN=SMARCA2 PE=1 SV=2
25.7964	25.2789	25.8768	24.2654	26.0307	24.4237	25.256	25.2757	24.5835	23.0317	25.6419	25.1874	24.2395	24.8167	25.2065	NaN	24.4569	23.5546	24.7372	21.394	24.0443	25.3141	25.1598	25.0889				10	10	6	9.2	9.2	5.8	181.26	0	25.812	790740000	62	sp|P51532-5|SMCA4_HUMAN;sp|P51532-2|SMCA4_HUMAN;sp|P51532-3|SMCA4_HUMAN;sp|P51532-4|SMCA4_HUMAN;sp|P51532|SMCA4_HUMAN	sp|P51532-5|SMCA4_HUMAN;sp|P51532-2|SMCA4_HUMAN;sp|P51532-3|SMCA4_HUMAN;sp|P51532-4|SMCA4_HUMAN;sp|P51532|SMCA4_HUMAN	sp|P51532-5|SMCA4_HUMAN Isoform 5 of Transcription activator BRG1 OS=Homo sapiens OX=9606 GN=SMARCA4;sp|P51532-2|SMCA4_HUMAN Isoform 2 of Transcription activator BRG1 OS=Homo sapiens OX=9606 GN=SMARCA4;sp|P51532-3|SMCA4_HUMAN Isoform 3 of Transcription act
27.0043	27.178	24.8363	26.906	27.1294	26.4467	26.5069	27.1179	28.0165	26.8836	26.9158	27.1193	26.4422	27.093	26.6483	26.8309	27.6111	26.2286	27.0847	27.4678	26.2445	27.8448	27.4713	27.3344				5	5	3	26.1	26.1	17.4	41.468	0	16.251	3799100000	107	sp|P51553-2|IDH3G_HUMAN;sp|P51553|IDH3G_HUMAN	sp|P51553-2|IDH3G_HUMAN;sp|P51553|IDH3G_HUMAN	sp|P51553-2|IDH3G_HUMAN Isoform 2 of Isocitrate dehydrogenase [NAD] subunit gamma, mitochondrial OS=Homo sapiens OX=9606 GN=IDH3G;sp|P51553|IDH3G_HUMAN Isocitrate dehydrogenase [NAD] subunit gamma, mitochondrial OS=Homo sapiens OX=9606 GN=IDH3G PE=1 SV=1
26.1628	25.7684	26.2426	25.8676	25.9023	25.1384	26.7112	26.5852	24.6095	26.7631	25.7789	26.2821	26.2128	26.0266	24.2414	26.4386	27.3629	24.5893	26.1326	25.3881	25.9146	26.2328	25.705	25.3802				2	2	2	8.1	8.1	8.1	27.991	0	87.525	2119400000	64	sp|P51572|BAP31_HUMAN;sp|P51572-2|BAP31_HUMAN	sp|P51572|BAP31_HUMAN;sp|P51572-2|BAP31_HUMAN	sp|P51572|BAP31_HUMAN B-cell receptor-associated protein 31 OS=Homo sapiens OX=9606 GN=BCAP31 PE=1 SV=3;sp|P51572-2|BAP31_HUMAN Isoform 2 of B-cell receptor-associated protein 31 OS=Homo sapiens OX=9606 GN=BCAP31
28.9238	29.0136	28.5969	28.4885	28.4507	28.8614	28.8001	28.7311	28.3714	28.2752	28.102	28.2904	28.9905	28.409	28.2807	28.9275	28.9304	28.8782	29.2822	29.1358	28.6027	28.5026	28.6129	29.2381				7	7	7	16.3	16.3	16.3	52.44	0	315.22	11396000000	209	sp|P51608|MECP2_HUMAN;sp|P51608-2|MECP2_HUMAN	sp|P51608|MECP2_HUMAN;sp|P51608-2|MECP2_HUMAN	sp|P51608|MECP2_HUMAN Methyl-CpG-binding protein 2 OS=Homo sapiens OX=9606 GN=MECP2 PE=1 SV=1;sp|P51608-2|MECP2_HUMAN Isoform B of Methyl-CpG-binding protein 2 OS=Homo sapiens OX=9606 GN=MECP2
26.8329	26.2607	25.4421	27.2775	27.0392	26.6826	26.3817	26.3047	27.6675	27.0093	26.8207	26.6176	26.2407	26.5513	26.0205	26.4466	26.9442	25.7381	26.4988	26.8841	27.0007	26.3851	26.7794	26.8099				11	11	11	10.4	10.4	10.4	208.73	0	69.108	2552400000	138	sp|P51610|HCFC1_HUMAN;sp|P51610-4|HCFC1_HUMAN;sp|P51610-2|HCFC1_HUMAN;sp|P51610-3|HCFC1_HUMAN	sp|P51610|HCFC1_HUMAN;sp|P51610-4|HCFC1_HUMAN;sp|P51610-2|HCFC1_HUMAN	sp|P51610|HCFC1_HUMAN Host cell factor 1 OS=Homo sapiens OX=9606 GN=HCFC1 PE=1 SV=2;sp|P51610-4|HCFC1_HUMAN Isoform 4 of Host cell factor 1 OS=Homo sapiens OX=9606 GN=HCFC1;sp|P51610-2|HCFC1_HUMAN Isoform 2 of Host cell factor 1 OS=Homo sapiens OX=9606 GN=
25.8783	25.2489	25.2155	24.0471	25.3051	25.4701	25.0722	25.8949	25.2911	25.7857	25.4895	26.8186	26.1988	24.7919	24.9238	25.5955	25.5143	26.4236	25.0807	25.4432	24.7225	25.523	25.3196	25.258				2	2	2	7.1	7.1	7.1	57.214	0	22.468	1186600000	95	sp|P51649|SSDH_HUMAN;sp|P51649-2|SSDH_HUMAN	sp|P51649|SSDH_HUMAN;sp|P51649-2|SSDH_HUMAN	sp|P51649|SSDH_HUMAN Succinate-semialdehyde dehydrogenase, mitochondrial OS=Homo sapiens OX=9606 GN=ALDH5A1 PE=1 SV=2;sp|P51649-2|SSDH_HUMAN Isoform 2 of Succinate-semialdehyde dehydrogenase, mitochondrial OS=Homo sapiens OX=9606 GN=ALDH5A1
27.8993	27.2924	27.4164	28.6243	28.0457	27.328	27.4757	27.1471	27.3002	27.7799	27.9947	27.7848	27.6257	27.2392	27.9804	27.8136	28.1478	27.9052	27.801	27.7108	27.7264	27.0976	27.6258	27.428				8	8	8	51.2	51.2	51.2	37.025	0	102.05	4186900000	212	sp|P51665|PSMD7_HUMAN	sp|P51665|PSMD7_HUMAN	sp|P51665|PSMD7_HUMAN 26S proteasome non-ATPase regulatory subunit 7 OS=Homo sapiens OX=9606 GN=PSMD7 PE=1 SV=2
28.1167	28.8231	27.8622	28.8727	27.9249	28.1808	28.8979	28.8899	NaN	27.782	28.196	28.3364	28.5729	28.5829	27.9341	27.6624	28.3967	27.9743	29.5783	27.528	29.3971	29.2129	28.7505	28.961				3	3	3	13.9	13.9	13.9	29.905	0	42.198	8923400000	58	sp|P51674-3|GPM6A_HUMAN;sp|P51674-2|GPM6A_HUMAN;sp|P51674|GPM6A_HUMAN	sp|P51674-3|GPM6A_HUMAN;sp|P51674-2|GPM6A_HUMAN;sp|P51674|GPM6A_HUMAN	sp|P51674-3|GPM6A_HUMAN Isoform 3 of Neuronal membrane glycoprotein M6-a OS=Homo sapiens OX=9606 GN=GPM6A;sp|P51674-2|GPM6A_HUMAN Isoform 2 of Neuronal membrane glycoprotein M6-a OS=Homo sapiens OX=9606 GN=GPM6A;sp|P51674|GPM6A_HUMAN Neuronal membrane glyc
28.2885	28.6532	28.2492	28.9813	28.8072	28.5917	28.3926	28.2651	27.9278	26.9494	28.5139	28.9214	28.4803	28.3086	28.6914	28.7367	29.5278	28.4377	28.4321	28.6655	28.2238	28.3488	28.1639	28.7083				4	4	4	18.5	18.5	18.5	25.537	0	323.31	10369000000	117	sp|P51858-2|HDGF_HUMAN;sp|P51858|HDGF_HUMAN;sp|P51858-3|HDGF_HUMAN	sp|P51858-2|HDGF_HUMAN;sp|P51858|HDGF_HUMAN;sp|P51858-3|HDGF_HUMAN	sp|P51858-2|HDGF_HUMAN Isoform 2 of Hepatoma-derived growth factor OS=Homo sapiens OX=9606 GN=HDGF;sp|P51858|HDGF_HUMAN Hepatoma-derived growth factor OS=Homo sapiens OX=9606 GN=HDGF PE=1 SV=1;sp|P51858-3|HDGF_HUMAN Isoform 3 of Hepatoma-derived growth fac
30.2264	29.9906	29.8495	29.9806	29.7	29.6525	30.1375	28.8879	30.5215	29.8412	29.7674	29.572	29.9625	29.3632	30.0692	29.7663	30.9772	30.3449	30.0069	29.8296	30.0478	30.0311	30.4992	29.9854				9	9	9	24.4	24.4	24.4	37.029	0	323.31	25387000000	257	sp|P51991-2|ROA3_HUMAN;sp|P51991|ROA3_HUMAN	sp|P51991-2|ROA3_HUMAN;sp|P51991|ROA3_HUMAN	sp|P51991-2|ROA3_HUMAN Isoform 2 of Heterogeneous nuclear ribonucleoprotein A3 OS=Homo sapiens OX=9606 GN=HNRNPA3;sp|P51991|ROA3_HUMAN Heterogeneous nuclear ribonucleoprotein A3 OS=Homo sapiens OX=9606 GN=HNRNPA3 PE=1 SV=2
28.9652	28.6511	28.8845	29.1611	29.2208	29.0146	28.7897	28.4301	28.8038	29.1622	29.0341	28.709	27.429	29.2497	29.4858	27.0153	28.4051	28.952	29.3477	28.5537	29.0286	28.5056	29.0106	28.7181				7	7	6	31.5	31.5	26.7	53.139	0	323.31	10240000000	176	sp|P52209|6PGD_HUMAN;sp|P52209-2|6PGD_HUMAN	sp|P52209|6PGD_HUMAN;sp|P52209-2|6PGD_HUMAN	sp|P52209|6PGD_HUMAN 6-phosphogluconate dehydrogenase, decarboxylating OS=Homo sapiens OX=9606 GN=PGD PE=1 SV=3;sp|P52209-2|6PGD_HUMAN Isoform 2 of 6-phosphogluconate dehydrogenase, decarboxylating OS=Homo sapiens OX=9606 GN=PGD
29.733	29.1211	29.4597	29.7265	29.7431	29.5577	29.8623	29.7059	29.5654	29.6974	29.528	29.6864	29.6386	29.3884	29.6601	29.5662	29.2772	30.1085	29.6347	29.2284	29.6361	29.1293	29.4879	29.5382				14	14	14	35.9	35.9	35.9	73.62	0	323.31	21714000000	535	sp|P52272-2|HNRPM_HUMAN;sp|P52272|HNRPM_HUMAN	sp|P52272-2|HNRPM_HUMAN;sp|P52272|HNRPM_HUMAN	sp|P52272-2|HNRPM_HUMAN Isoform 2 of Heterogeneous nuclear ribonucleoprotein M OS=Homo sapiens OX=9606 GN=HNRNPM;sp|P52272|HNRPM_HUMAN Heterogeneous nuclear ribonucleoprotein M OS=Homo sapiens OX=9606 GN=HNRNPM PE=1 SV=3
25.882	25.3696	25.4085	25.6775	26.3378	25.7858	25.437	25.6111	24.7953	25.9865	25.8584	25.4799	25.7209	25.3297	25.5412	23.988	26.3707	25.8251	26.403	25.6383	25.6237	25.4705	25.8392	25.8623				9	6	6	33.6	26.4	26.4	60.221	0	323.31	1254800000	153	sp|P52294|IMA5_HUMAN	sp|P52294|IMA5_HUMAN	sp|P52294|IMA5_HUMAN Importin subunit alpha-5 OS=Homo sapiens OX=9606 GN=KPNA1 PE=1 SV=3
28.7768	28.6166	28.4145	28.7524	28.8117	28.8269	28.6618	28.7387	28.863	28.6194	28.9193	28.948	28.4971	28.5489	28.8923	28.1034	28.8994	29.0609	28.9278	28.8043	28.6911	28.6414	28.5075	28.6983				11	11	3	35.7	35.7	9.1	61.036	0	323.31	10604000000	389	sp|P52306-2|GDS1_HUMAN;sp|P52306-3|GDS1_HUMAN;sp|P52306|GDS1_HUMAN;sp|P52306-5|GDS1_HUMAN;sp|P52306-6|GDS1_HUMAN	sp|P52306-2|GDS1_HUMAN;sp|P52306-3|GDS1_HUMAN;sp|P52306|GDS1_HUMAN;sp|P52306-5|GDS1_HUMAN;sp|P52306-6|GDS1_HUMAN	sp|P52306-2|GDS1_HUMAN Isoform 2 of Rap1 GTPase-GDP dissociation stimulator 1 OS=Homo sapiens OX=9606 GN=RAP1GDS1;sp|P52306-3|GDS1_HUMAN Isoform 3 of Rap1 GTPase-GDP dissociation stimulator 1 OS=Homo sapiens OX=9606 GN=RAP1GDS1;sp|P52306|GDS1_HUMAN Rap1 GT
27.2092	27.2393	26.5541	26.9899	27.0933	27.4535	26.6828	26.4283	26.6527	27.362	27.221	26.8742	27.7985	26.4974	27.3656	26.9568	27.7094	27.2546	26.7188	27.1007	25.4039	26.4719	26.6179	27.0912				5	5	5	18.2	18.2	18.2	63.926	0	76.049	3436500000	132	sp|P52429|DGKE_HUMAN	sp|P52429|DGKE_HUMAN	sp|P52429|DGKE_HUMAN Diacylglycerol kinase epsilon OS=Homo sapiens OX=9606 GN=DGKE PE=1 SV=1
24.8432	22.5475	23.9278	23.8361	24.7288	23.6481	23.9994	23.6193	23.9123	24.9833	24.548	24.1145	24.9992	25.7046	24.9914	24.9149	25.2127	24.666	24.7426	25.0488	24.7233	24.3998	24.4339	24.3855				3	3	3	49.6	49.6	49.6	13.092	0	70.819	469410000	45	sp|Q9H1A7|RPB1C_HUMAN;sp|Q9GZM3|RPB1B_HUMAN;sp|P52435|RPB11_HUMAN;sp|Q9GZM3-2|RPB1B_HUMAN	sp|Q9H1A7|RPB1C_HUMAN;sp|Q9GZM3|RPB1B_HUMAN;sp|P52435|RPB11_HUMAN	sp|Q9H1A7|RPB1C_HUMAN DNA-directed RNA polymerase II subunit RPB11-b2 OS=Homo sapiens OX=9606 GN=POLR2J3 PE=3 SV=1;sp|Q9GZM3|RPB1B_HUMAN DNA-directed RNA polymerase II subunit RPB11-b1 OS=Homo sapiens OX=9606 GN=POLR2J2 PE=1 SV=2;sp|P52435|RPB11_HUMAN DNA-
31.813	32.3776	29.6197	31.3406	30.5937	28.966	31.0982	32.3488	31.3543	30.5739	29.498	31.67	31.4586	31.9054	30.8853	31.0481	31.4948	29.8656	32.3831	31.3938	31.1857	31.9076	31.0904	31.9362				4	4	3	27.6	27.6	21.3	13.723	0	58.641	84019000000	270	sp|P52552|PRDX2_PIG	sp|P52552|PRDX2_PIG	sp|P52552|PRDX2_PIG Peroxiredoxin-2 (Fragment) OS=Sus scrofa OX=9823 GN=PRDX2 PE=2 SV=1
24.2524	24.0518	24.741	23.9971	22.0048	22.9189	23.7052	23.8155	23.3592	23.8239	23.3936	23.743	23.6697	23.4385	24.9304	24.4686	22.5504	23.6023	23.6154	NaN	NaN	23.8493	23.8848	24.5599				4	4	4	20.9	20.9	20.9	31.339	0	50.498	437000000	28	sp|P52564-2|MP2K6_HUMAN;sp|P52564|MP2K6_HUMAN	sp|P52564-2|MP2K6_HUMAN;sp|P52564|MP2K6_HUMAN	sp|P52564-2|MP2K6_HUMAN Isoform 2 of Dual specificity mitogen-activated protein kinase kinase 6 OS=Homo sapiens OX=9606 GN=MAP2K6;sp|P52564|MP2K6_HUMAN Dual specificity mitogen-activated protein kinase kinase 6 OS=Homo sapiens OX=9606 GN=MAP2K6 PE=1 SV=1
27.6969	26.0353	27.484	28.8025	27.8994	27.9417	28.2846	27.2875	29.4505	26.1948	28.3036	28.6825	27.7253	27.1387	NaN	27.3446	26.5051	26.7671	28.508	26.8584	30.2158	26.7816	28.9295	27.7611				2	2	2	30	30	30	18.232	0	182.21	4498900000	31	sp|P52565-2|GDIR1_HUMAN;sp|P52565|GDIR1_HUMAN	sp|P52565-2|GDIR1_HUMAN;sp|P52565|GDIR1_HUMAN	sp|P52565-2|GDIR1_HUMAN Isoform 2 of Rho GDP-dissociation inhibitor 1 OS=Homo sapiens OX=9606 GN=ARHGDIA;sp|P52565|GDIR1_HUMAN Rho GDP-dissociation inhibitor 1 OS=Homo sapiens OX=9606 GN=ARHGDIA PE=1 SV=3
23.6771	23.7928	23.6172	23.4532	23.5086	23.9198	23.7262	23.8745	23.5828	NaN	22.8902	23.1086	23.0579	23.9623	23.443	22.3132	22.2898	23.4655	23.9671	22.9775	22.8865	23.7334	23.0696	23.9741				3	3	3	9.4	9.4	9.4	54.181	0	40.575	244810000	57	sp|P52594-2|AGFG1_HUMAN;sp|P52594-3|AGFG1_HUMAN;sp|P52594|AGFG1_HUMAN;sp|P52594-4|AGFG1_HUMAN	sp|P52594-2|AGFG1_HUMAN;sp|P52594-3|AGFG1_HUMAN;sp|P52594|AGFG1_HUMAN;sp|P52594-4|AGFG1_HUMAN	sp|P52594-2|AGFG1_HUMAN Isoform 2 of Arf-GAP domain and FG repeat-containing protein 1 OS=Homo sapiens OX=9606 GN=AGFG1;sp|P52594-3|AGFG1_HUMAN Isoform 3 of Arf-GAP domain and FG repeat-containing protein 1 OS=Homo sapiens OX=9606 GN=AGFG1;sp|P52594|AGFG1_
28.1605	27.9226	27.7334	27.8127	28.1759	27.7301	28.0299	27.8994	28.2871	28.4349	28.0848	28.1144	27.8538	28.0029	28.3942	28.7641	27.4317	27.4182	27.374	28.1228	27.6231	27.5443	27.7083	27.7575				6	5	5	22.7	18.6	18.6	45.671	0	321.18	7066600000	222	sp|P52597|HNRPF_HUMAN	sp|P52597|HNRPF_HUMAN	sp|P52597|HNRPF_HUMAN Heterogeneous nuclear ribonucleoprotein F OS=Homo sapiens OX=9606 GN=HNRNPF PE=1 SV=3
23.0626	22.7457	23.9041	23.4705	23.8691	23.2821	24.3899	23.7058	23.4328	22.9572	23.6795	23.1351	24.0994	24.3823	23.1889	23.8287	24.5793	23.8419	23.264	23.781	22.9566	23.8397	23.4887	23.9584				2	2	2	7.4	7.4	7.4	41.513	0	18.263	416570000	62	sp|P52655|TF2AA_HUMAN	sp|P52655|TF2AA_HUMAN	sp|P52655|TF2AA_HUMAN Transcription initiation factor IIA subunit 1 OS=Homo sapiens OX=9606 GN=GTF2A1 PE=1 SV=1
23.4356	22.4002	23.9902	23.4669	23.1417	23.1569	22.8961	22.7169	23.1126	23.3023	23.2066	23.2874	23.9229	23.3164	23.9296	NaN	23.7325	24.0515	22.2583	22.9297	NaN	22.8724	23.1377	21.9828				2	2	2	46.8	46.8	46.8	12.457	0	34.429	183260000	36	sp|P52657|T2AG_HUMAN	sp|P52657|T2AG_HUMAN	sp|P52657|T2AG_HUMAN Transcription initiation factor IIA subunit 2 OS=Homo sapiens OX=9606 GN=GTF2A2 PE=1 SV=1
26.6084	26.4537	25.7601	27.11	27.2056	26.7526	26.3338	26.3464	26.519	26.6529	27.0582	27.1069	26.572	27.1423	26.7269	27.3154	26.3161	27.0622	26.8246	27.0513	26.8436	26.1773	26.5708	26.6019				10	10	10	53.3	53.3	53.3	41.268	0	134.91	2172200000	186	sp|P52788|SPSY_HUMAN;sp|P52788-2|SPSY_HUMAN	sp|P52788|SPSY_HUMAN;sp|P52788-2|SPSY_HUMAN	sp|P52788|SPSY_HUMAN Spermine synthase OS=Homo sapiens OX=9606 GN=SMS PE=1 SV=2;sp|P52788-2|SPSY_HUMAN Isoform 2 of Spermine synthase OS=Homo sapiens OX=9606 GN=SMS
24.6492	25.4169	25.7389	24.6139	24.9623	24.3985	25.578	25.379	25.7952	25.3195	24.5393	24.6911	26.39	25.537	25.5853	26.4283	25.3793	NaN	25.512	26.3782	25.656	25.2469	25.7733	25.9692				3	3	3	17.7	17.7	17.7	21.348	0	153.09	919850000	47	sp|P52815|RM12_HUMAN	sp|P52815|RM12_HUMAN	sp|P52815|RM12_HUMAN 39S ribosomal protein L12, mitochondrial OS=Homo sapiens OX=9606 GN=MRPL12 PE=1 SV=2
27.2675	26.4954	28.631	28.0294	26.366	26.5158	27.8228	27.2464	26.7964	27.0076	26.8904	26.5863	26.7872	26.5575	27.5123	27.7551	26.2518	26.1585	26.8743	27.1146	26.3962	26.9084	27.6291	26.6871				5	4	4	28.7	25.2	25.2	32.922	0	41.922	3920200000	82	sp|P52907|CAZA1_HUMAN	sp|P52907|CAZA1_HUMAN	sp|P52907|CAZA1_HUMAN F-actin-capping protein subunit alpha-1 OS=Homo sapiens OX=9606 GN=CAPZA1 PE=1 SV=3
25.7929	26.4279	22.9807	25.5416	24.7273	25.0372	25.6325	26.5258	25.7009	22.2069	24.9806	24.9158	25.4619	25.1715	25.4585	24.9722	24.1947	24.0646	25.3841	26.1511	23.8153	25.2788	25.8659	24.907				3	3	3	13.2	13.2	13.2	33.428	0	19.328	1104900000	68	sp|P53004|BIEA_HUMAN	sp|P53004|BIEA_HUMAN	sp|P53004|BIEA_HUMAN Biliverdin reductase A OS=Homo sapiens OX=9606 GN=BLVRA PE=1 SV=2
25.9213	26.3036	25.4495	25.9689	25.1145	25.2811	26.2435	26.6367	25.6175	26.1399	25.5798	26.3092	25.4383	26.3695	25.9357	25.1909	25.6562	25.1865	25.1166	24.6691	25.7326	25.7847	26.1157	25.8431				4	4	4	26.7	26.7	26.7	34.012	0	21.876	1386000000	89	sp|P53007|TXTP_HUMAN	sp|P53007|TXTP_HUMAN	sp|P53007|TXTP_HUMAN Tricarboxylate transport protein, mitochondrial OS=Homo sapiens OX=9606 GN=SLC25A1 PE=1 SV=2
25.4215	24.4989	24.8941	26.1042	26.0855	25.5003	24.946	24.2775	25.4503	23.6467	26.0635	25.806	25.6169	25.5998	25.7395	25.9098	25.9048	26.6418	25.5457	25.4025	24.8521	25.686	25.0803	25.2797				6	6	6	19.8	19.8	19.8	56.878	0	200.93	1358800000	103	sp|P53041|PPP5_HUMAN	sp|P53041|PPP5_HUMAN	sp|P53041|PPP5_HUMAN Serine/threonine-protein phosphatase 5 OS=Homo sapiens OX=9606 GN=PPP5C PE=1 SV=1
24.216	NaN	23.858	24.782	24.2349	24.2715	24.4991	23.3799	25.331	23.7631	24.1161	NaN	24.4937	23.353	NaN	24.3422	23.6885	24.7632	25.7472	25.4503	22.7591	24.2824	25.3913	24.7436				4	4	4	23.8	23.8	23.8	29.044	0	87.494	564700000	37	sp|P53365-2|ARFP2_HUMAN;sp|P53365-3|ARFP2_HUMAN;sp|P53365|ARFP2_HUMAN	sp|P53365-2|ARFP2_HUMAN;sp|P53365-3|ARFP2_HUMAN;sp|P53365|ARFP2_HUMAN	sp|P53365-2|ARFP2_HUMAN Isoform 2 of Arfaptin-2 OS=Homo sapiens OX=9606 GN=ARFIP2;sp|P53365-3|ARFP2_HUMAN Isoform 3 of Arfaptin-2 OS=Homo sapiens OX=9606 GN=ARFIP2;sp|P53365|ARFP2_HUMAN Arfaptin-2 OS=Homo sapiens OX=9606 GN=ARFIP2 PE=1 SV=1
27.6117	27.5298	27.667	28.0671	27.9778	28.1475	27.5818	27.7517	28.2188	28.1458	28.0472	27.838	27.4915	28.1185	27.838	28.2021	27.7529	27.7952	27.6016	27.4321	27.721	27.9111	27.7159	27.8714				24	24	24	33.3	33.3	33.3	119.77	0	323.31	6595400000	391	sp|P53396-2|ACLY_HUMAN;sp|P53396|ACLY_HUMAN;sp|P53396-3|ACLY_HUMAN	sp|P53396-2|ACLY_HUMAN;sp|P53396|ACLY_HUMAN;sp|P53396-3|ACLY_HUMAN	sp|P53396-2|ACLY_HUMAN Isoform 2 of ATP-citrate synthase OS=Homo sapiens OX=9606 GN=ACLY;sp|P53396|ACLY_HUMAN ATP-citrate synthase OS=Homo sapiens OX=9606 GN=ACLY PE=1 SV=3;sp|P53396-3|ACLY_HUMAN Isoform 3 of ATP-citrate synthase OS=Homo sapiens OX=9606 GN
26.3522	25.8243	26.3236	26.2955	26.0118	26.5833	26.1348	25.5244	25.8953	26.2958	27.1096	26.6481	26.7939	25.7504	26.8845	27.2395	24.15	26.6636	26.399	26.5411	26.3402	25.7251	25.3758	25.3917				10	9	9	42.3	40.6	40.6	46.802	0	248.32	1678200000	133	sp|P53590|SUCB2_PIG;sp|Q96I99|SUCB2_HUMAN;sp|Q96I99-2|SUCB2_HUMAN	sp|P53590|SUCB2_PIG;sp|Q96I99|SUCB2_HUMAN;sp|Q96I99-2|SUCB2_HUMAN	sp|P53590|SUCB2_PIG Succinate--CoA ligase [GDP-forming] subunit beta, mitochondrial (Fragment) OS=Sus scrofa OX=9823 GN=SUCLG2 PE=1 SV=2;sp|Q96I99|SUCB2_HUMAN Succinate--CoA ligase [GDP-forming] subunit beta, mitochondrial OS=Homo sapiens OX=9606 GN=SUCLG2
[truncated: 1,162 more rows]
